# Supplementary material
Source: PubMed Central journal article supplement (PMC4399556)

# Supplemental Figure 3.

## Lu3 INV

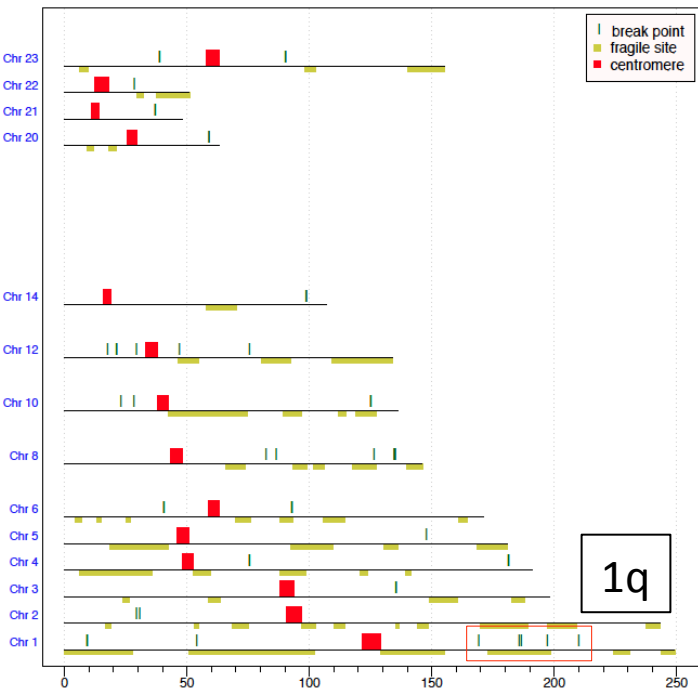

## Lu3 L

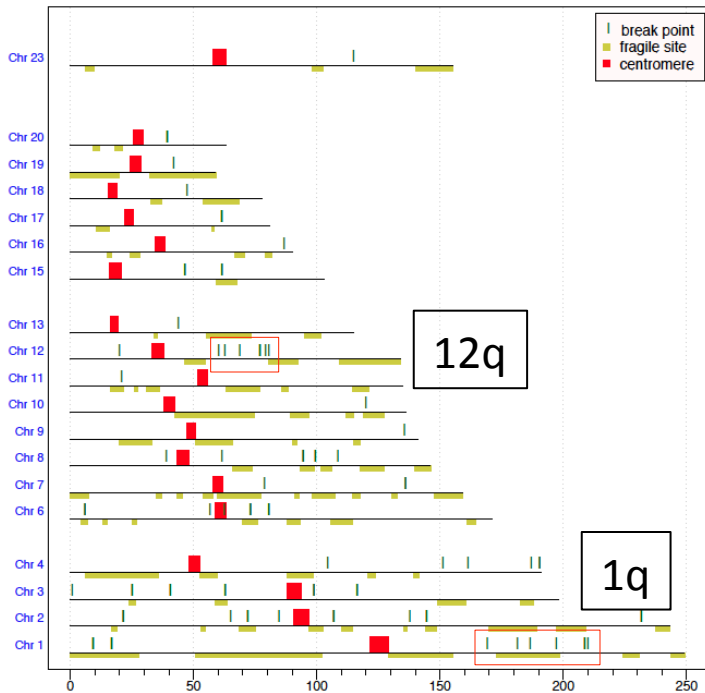

## Lu4 INV

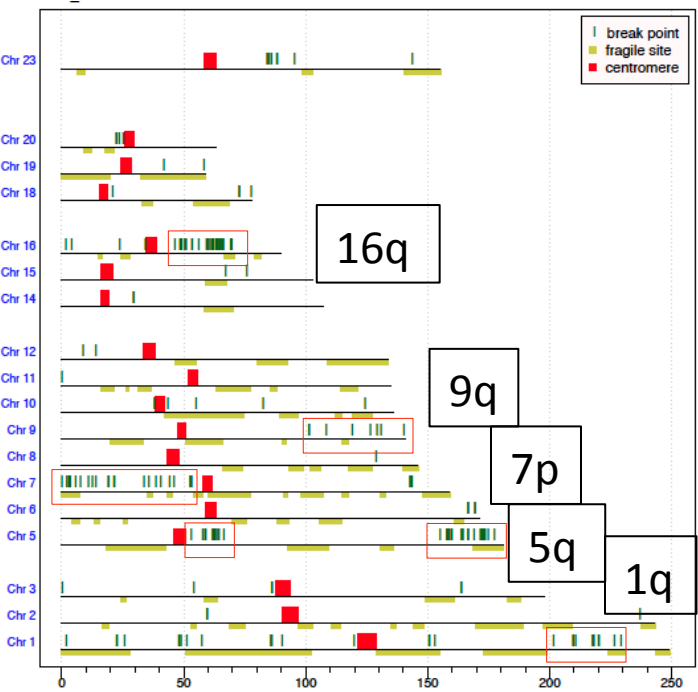

## Lu4 L

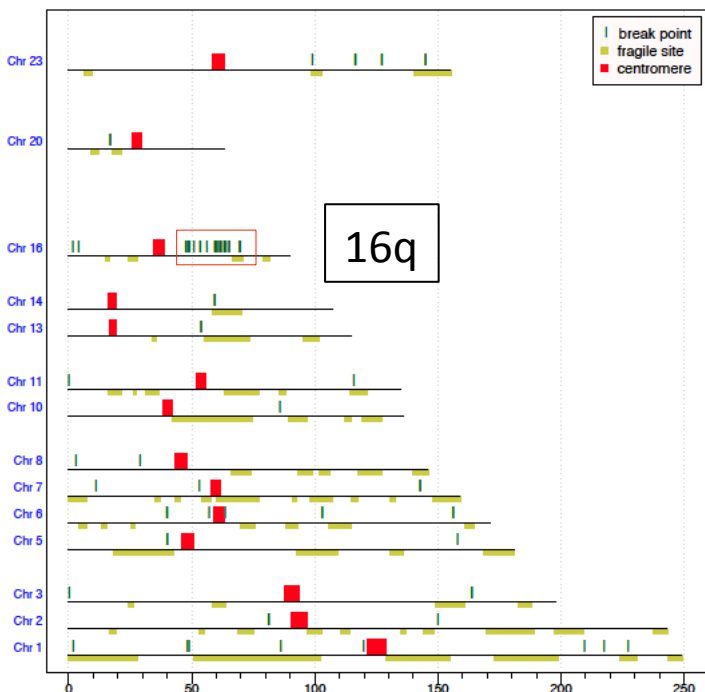

## Lu5 INV

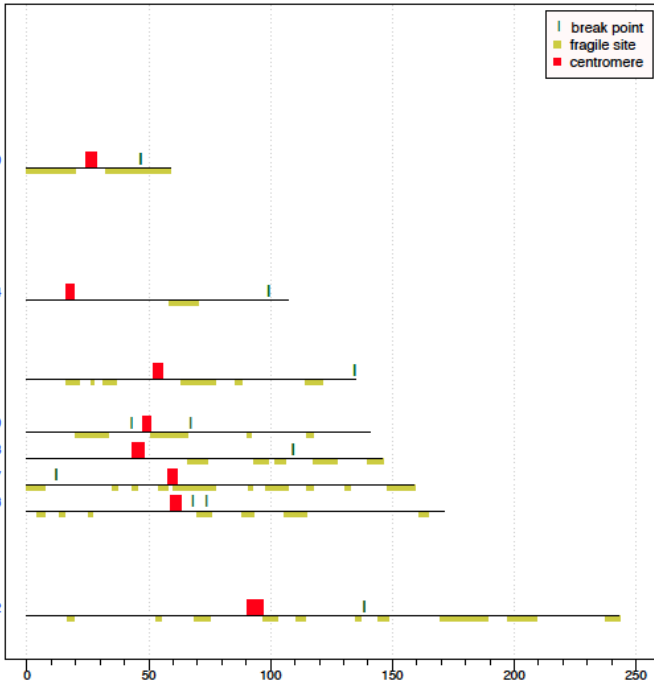

## Lu5 L

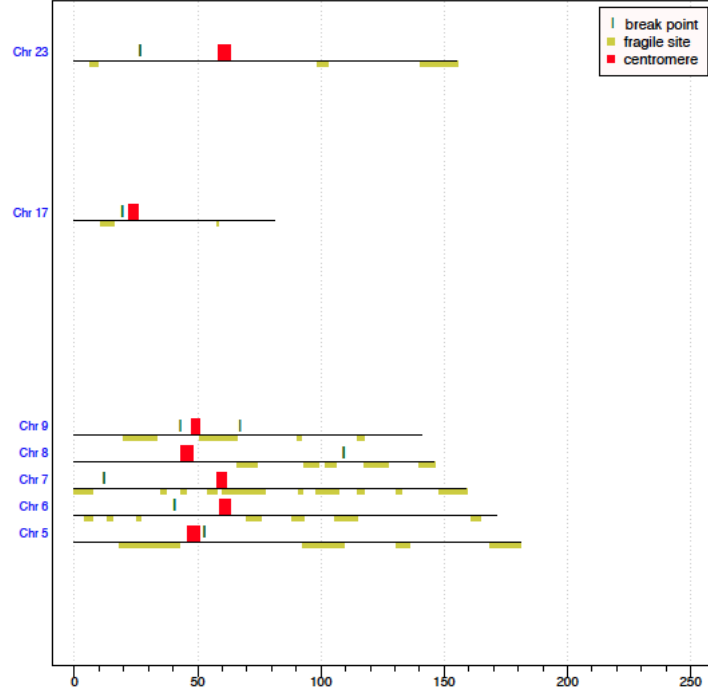

## Lu6 INV

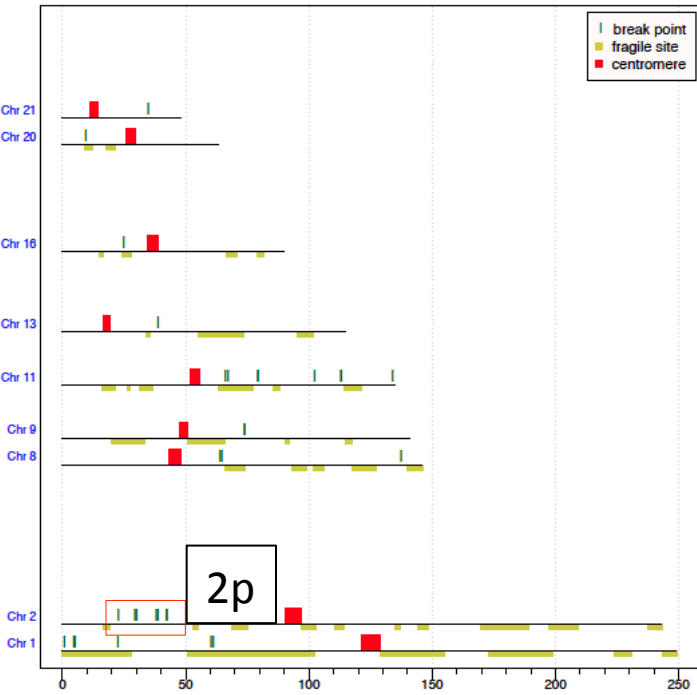

## Lu6 L

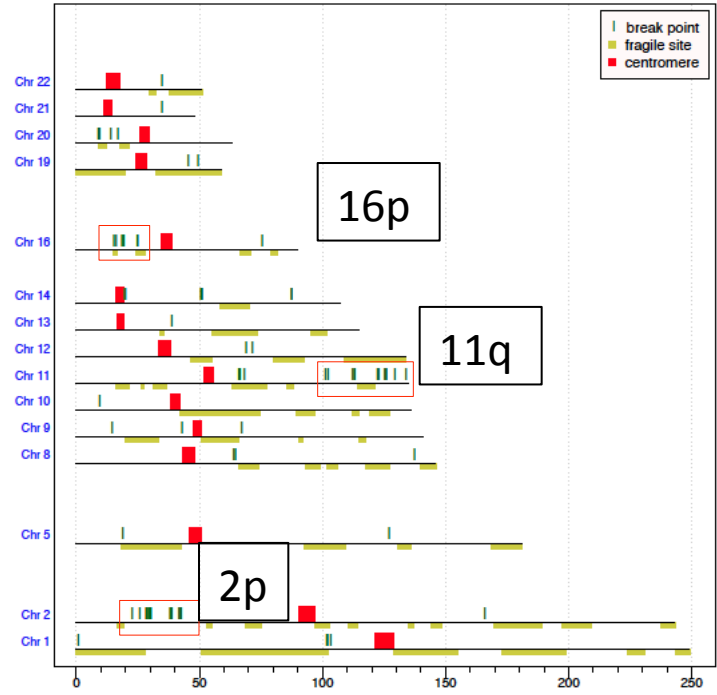

# Lu7 INV

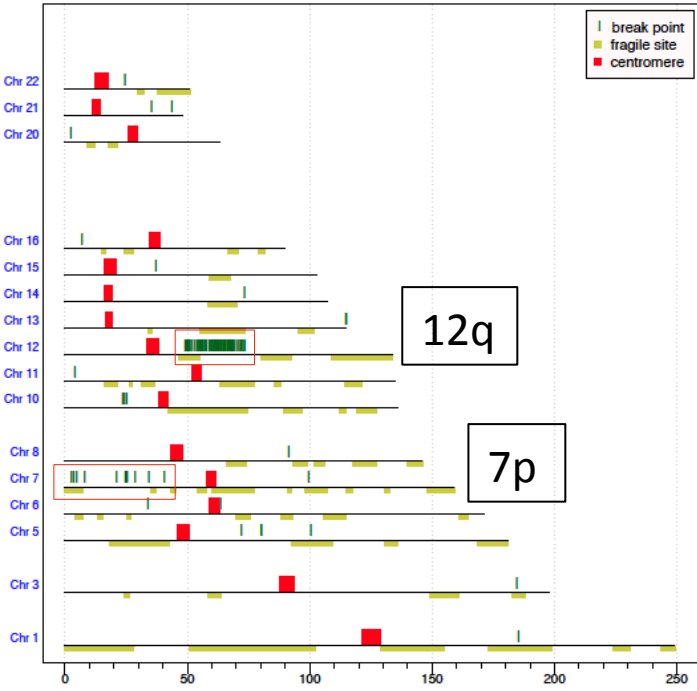

# Lu7 L

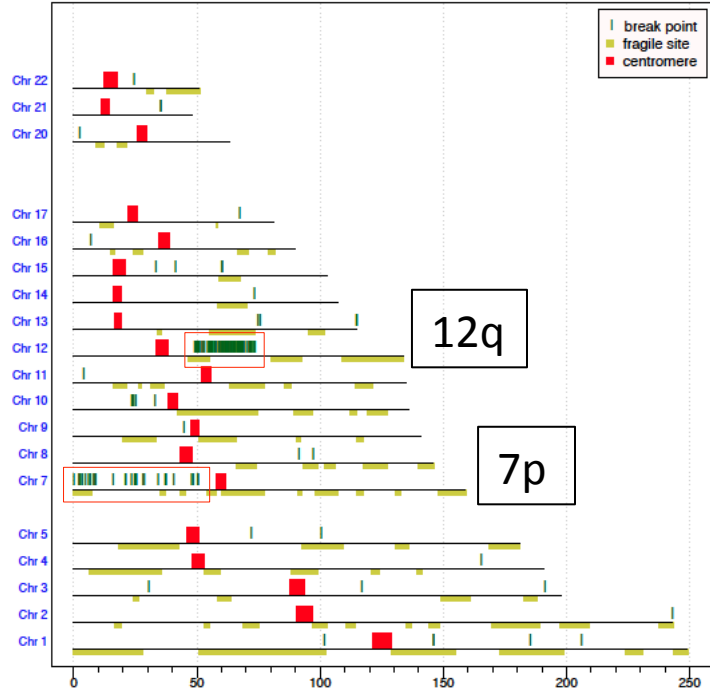

# Lu8 INV

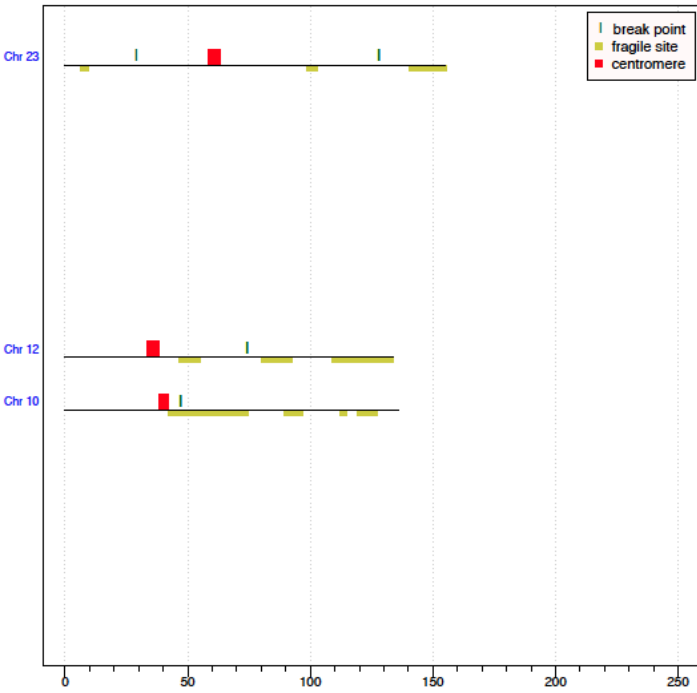

# Lu8 L

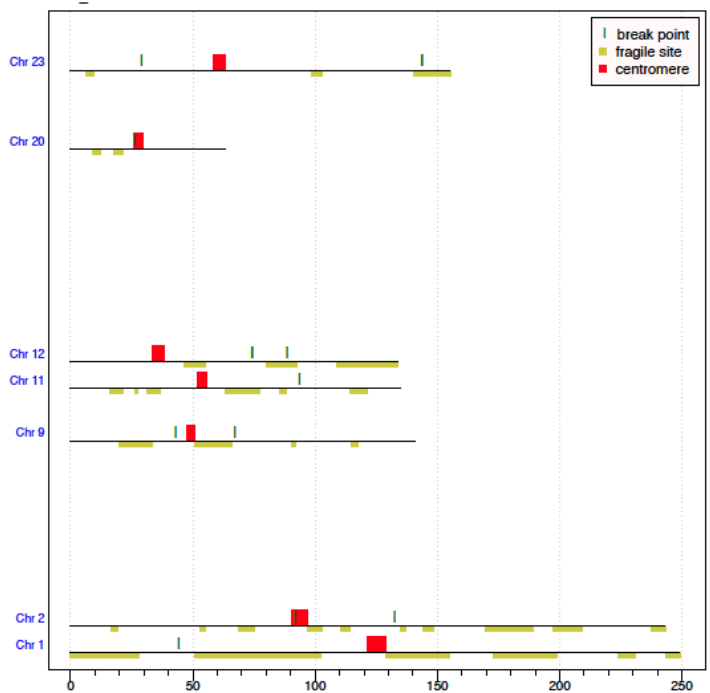

# Lu11 INV

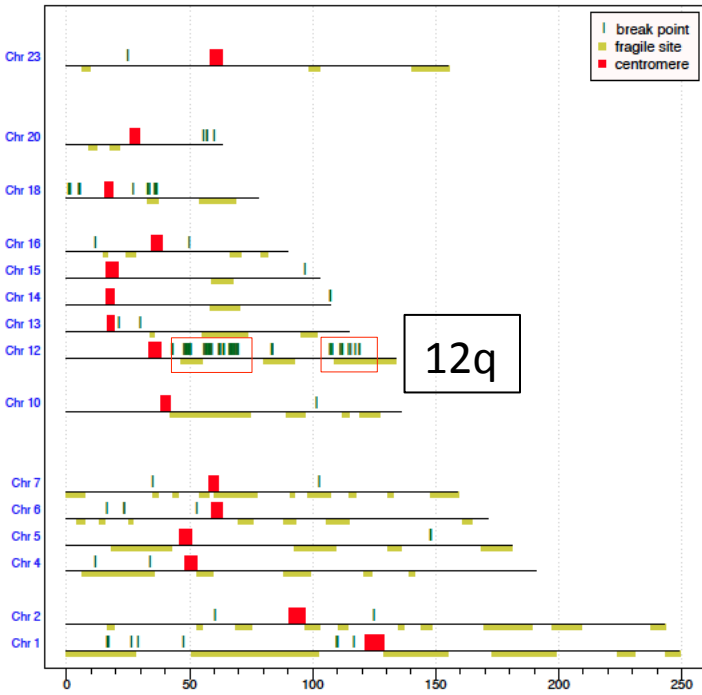

# Lu11 L

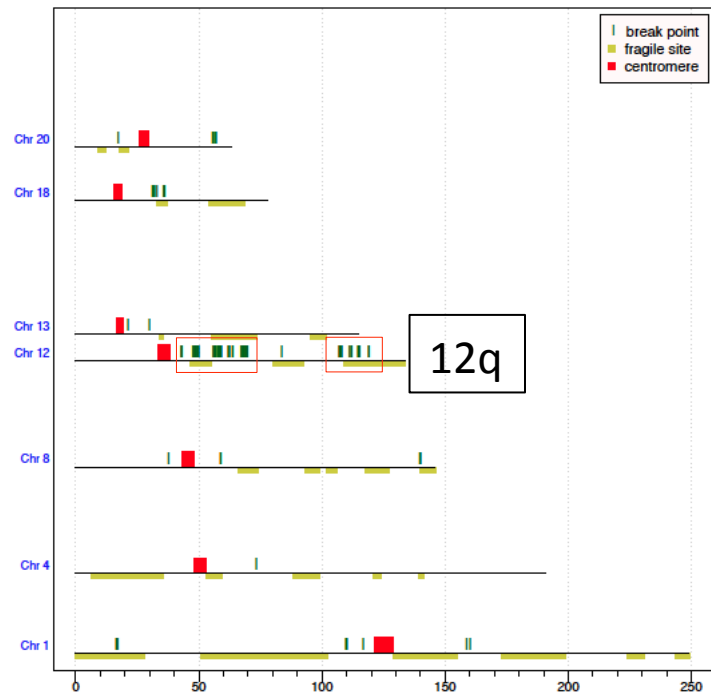

# Lu12 INV

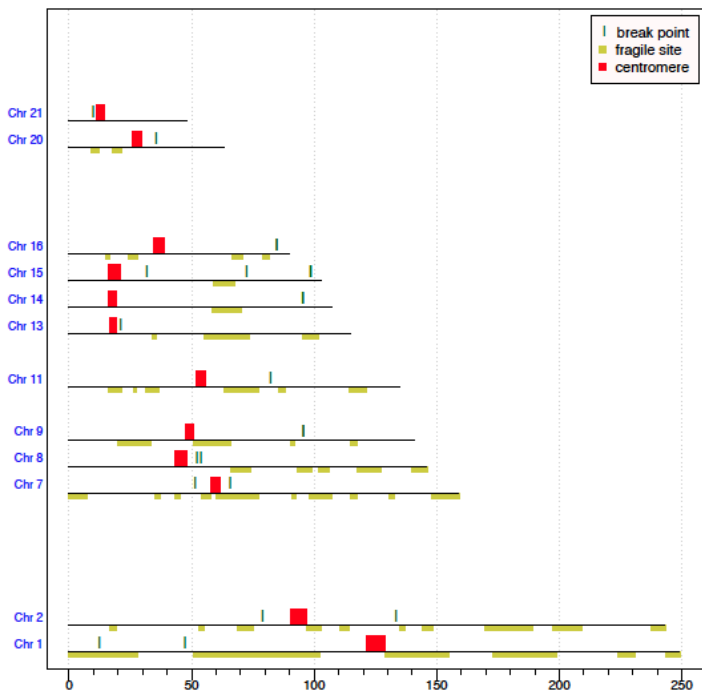

# Lu12 L

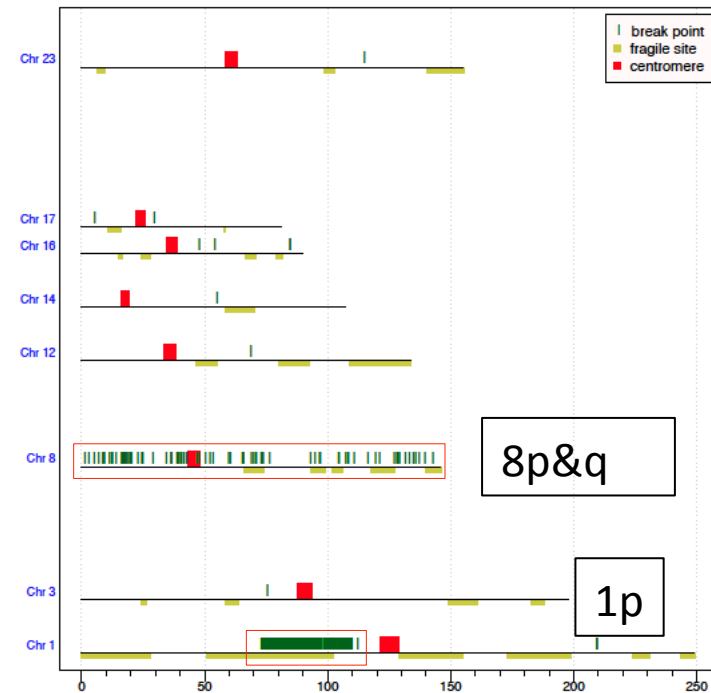

### Lu14 INV

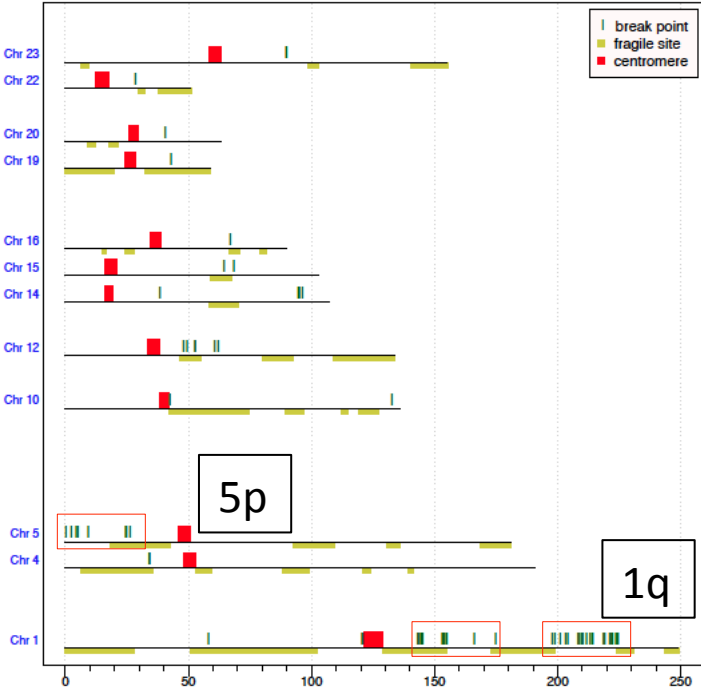

### Lu14 L

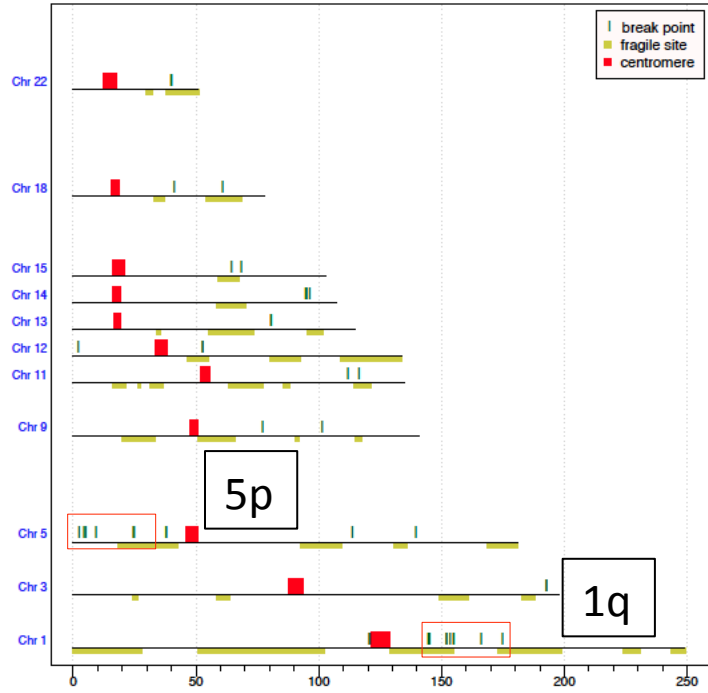

### Lu15 INV

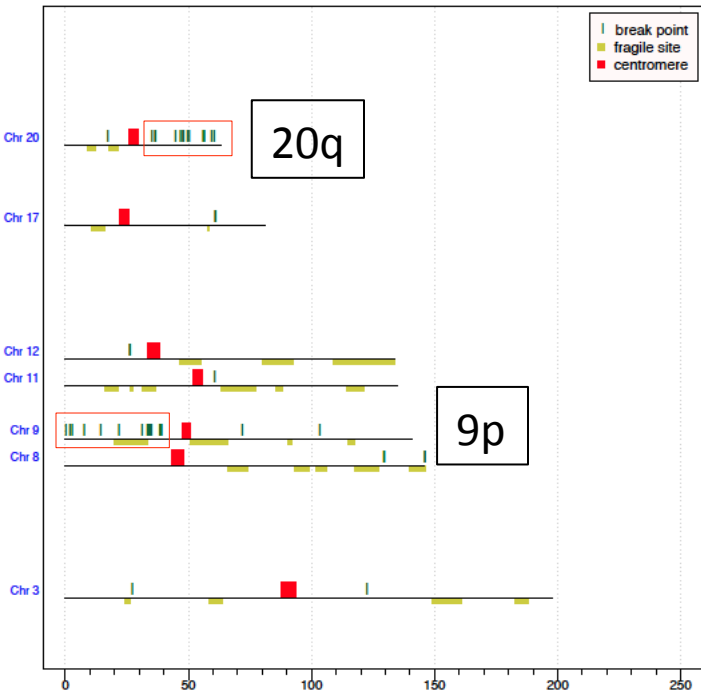

### Lu15 L

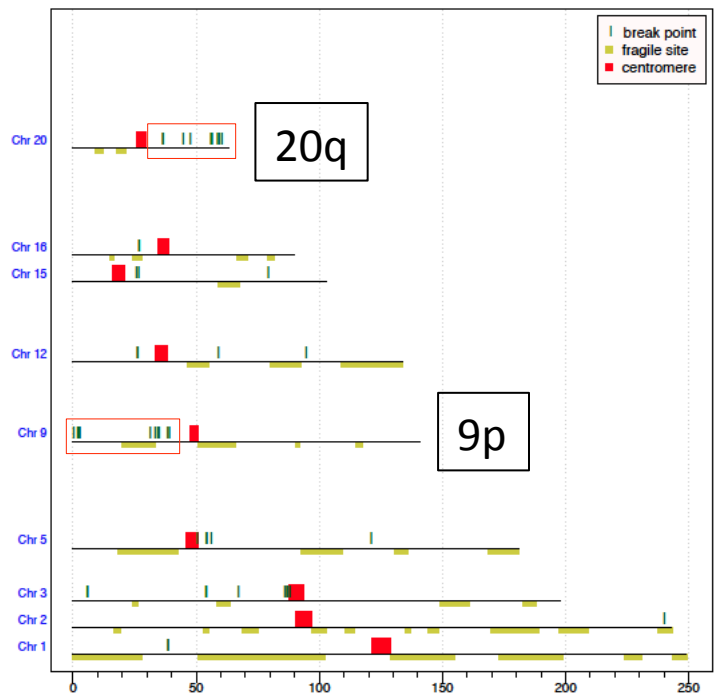

### Lu16 INV

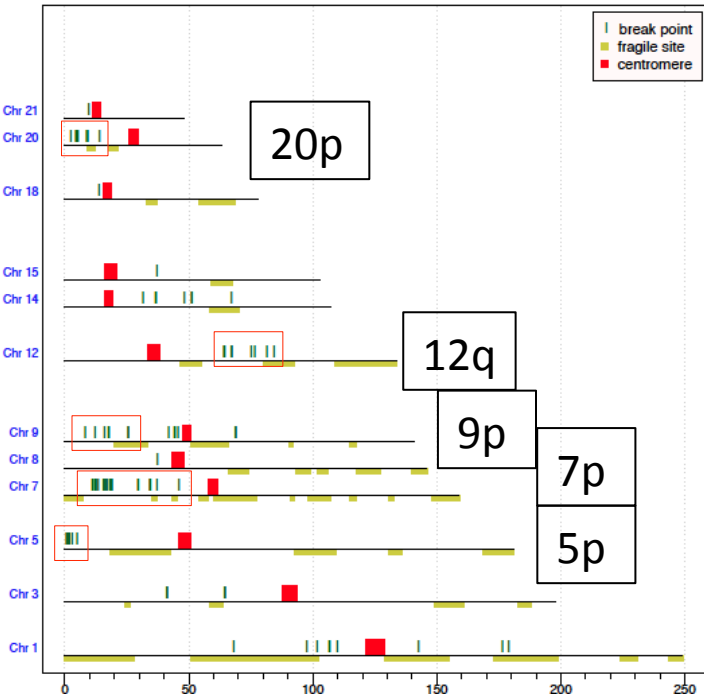

### Lu16 L

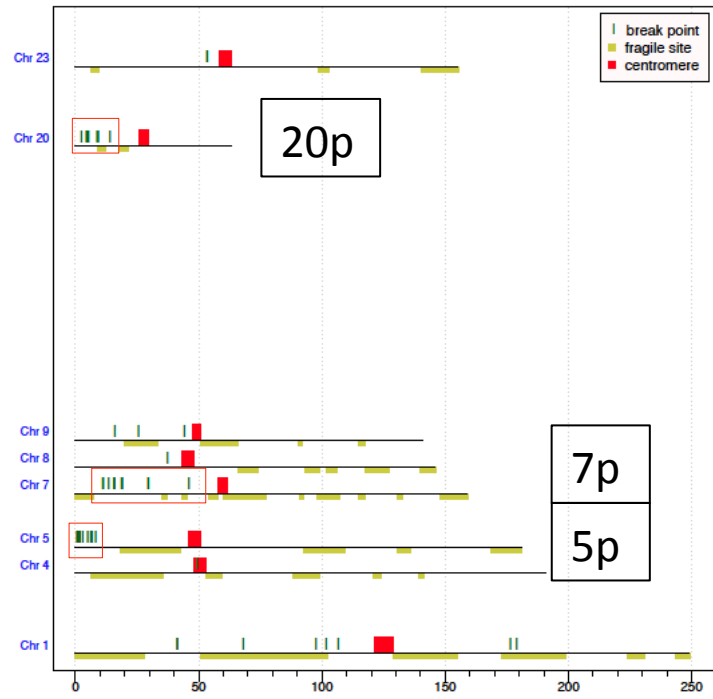

### Lu18 INV

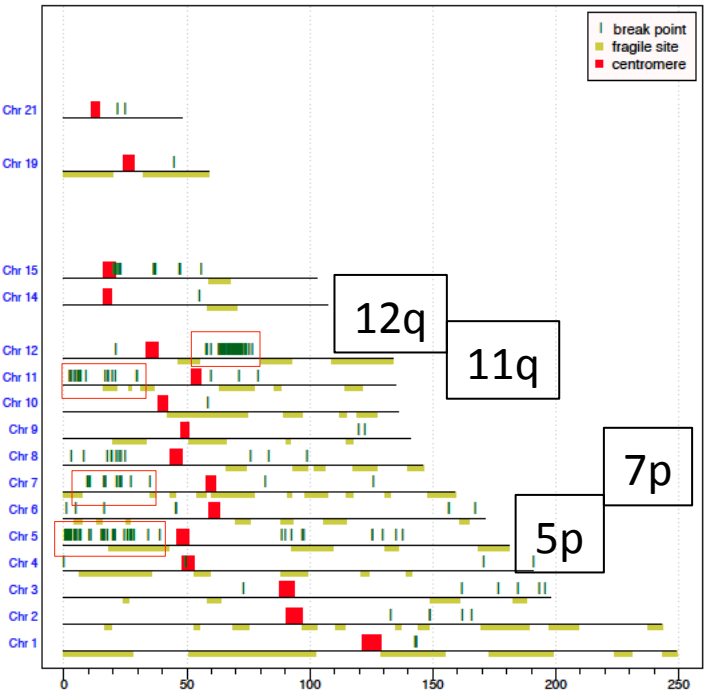

### Lu18 L

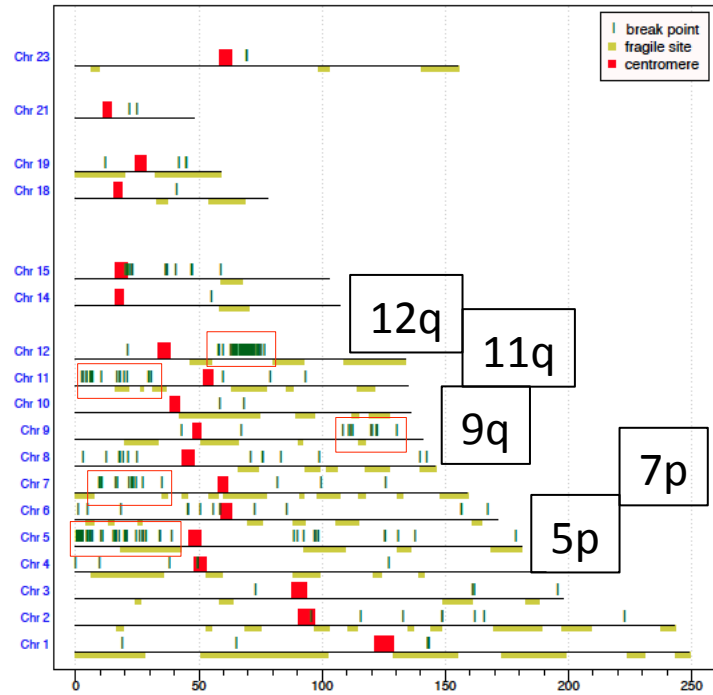

# Lu20 INV

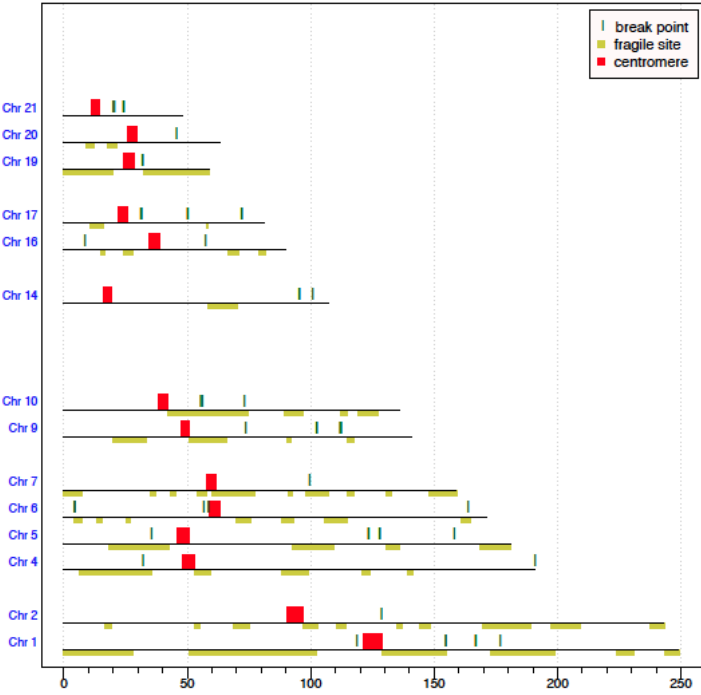

# Lu20 L

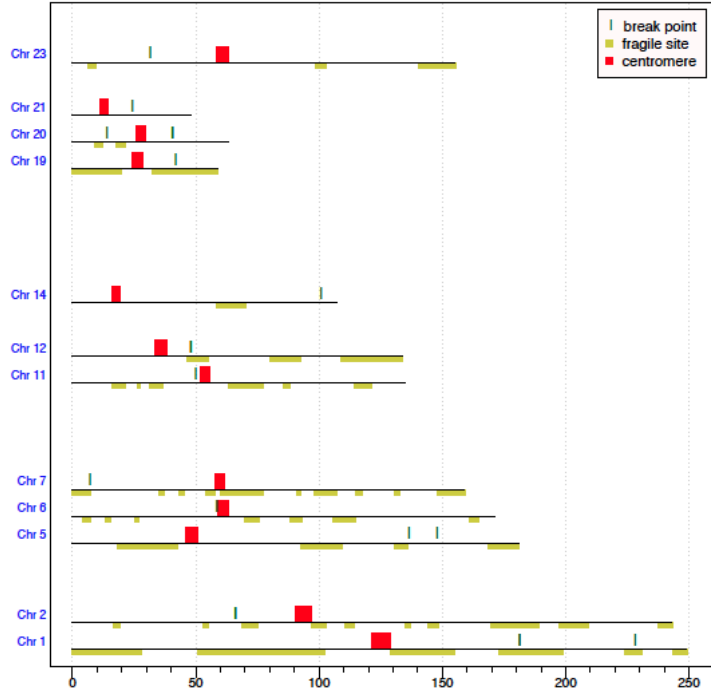

# Lu21 INV

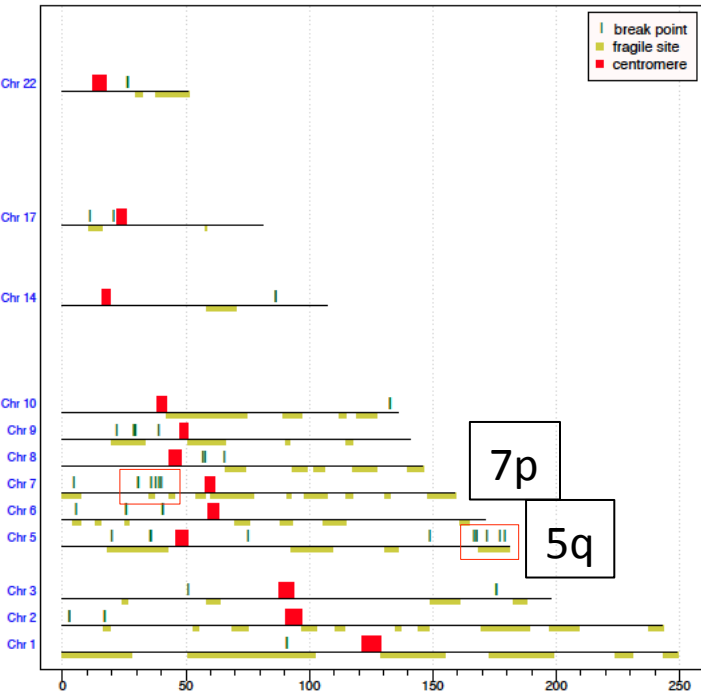

# Lu21 L

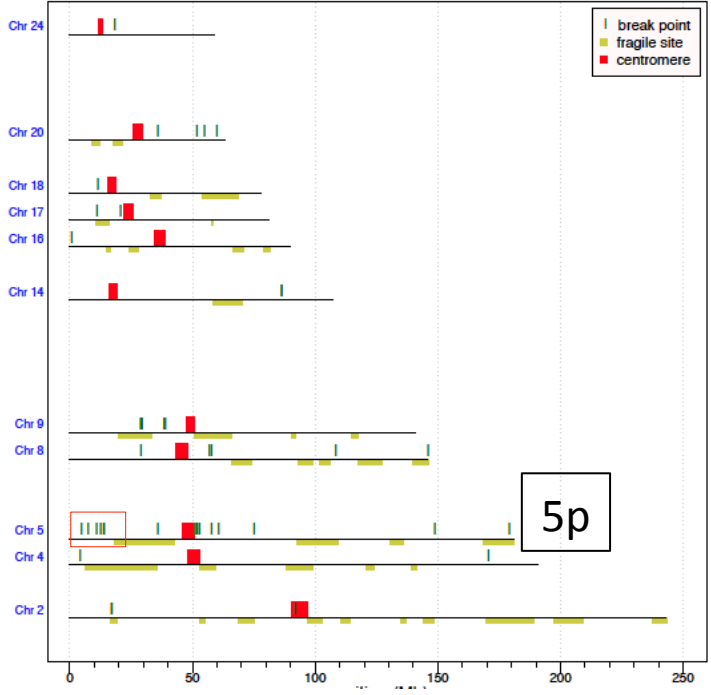

Supplement: NIHMS660173-supplement-s3.pdf [file NIHMS660173-supplement-s3.pdf]
