# Supplementary material
Source: PubMed Central journal article supplement (PMC4399556)

# Supplementary Figure 4.

## a. Additional Break Point Validations

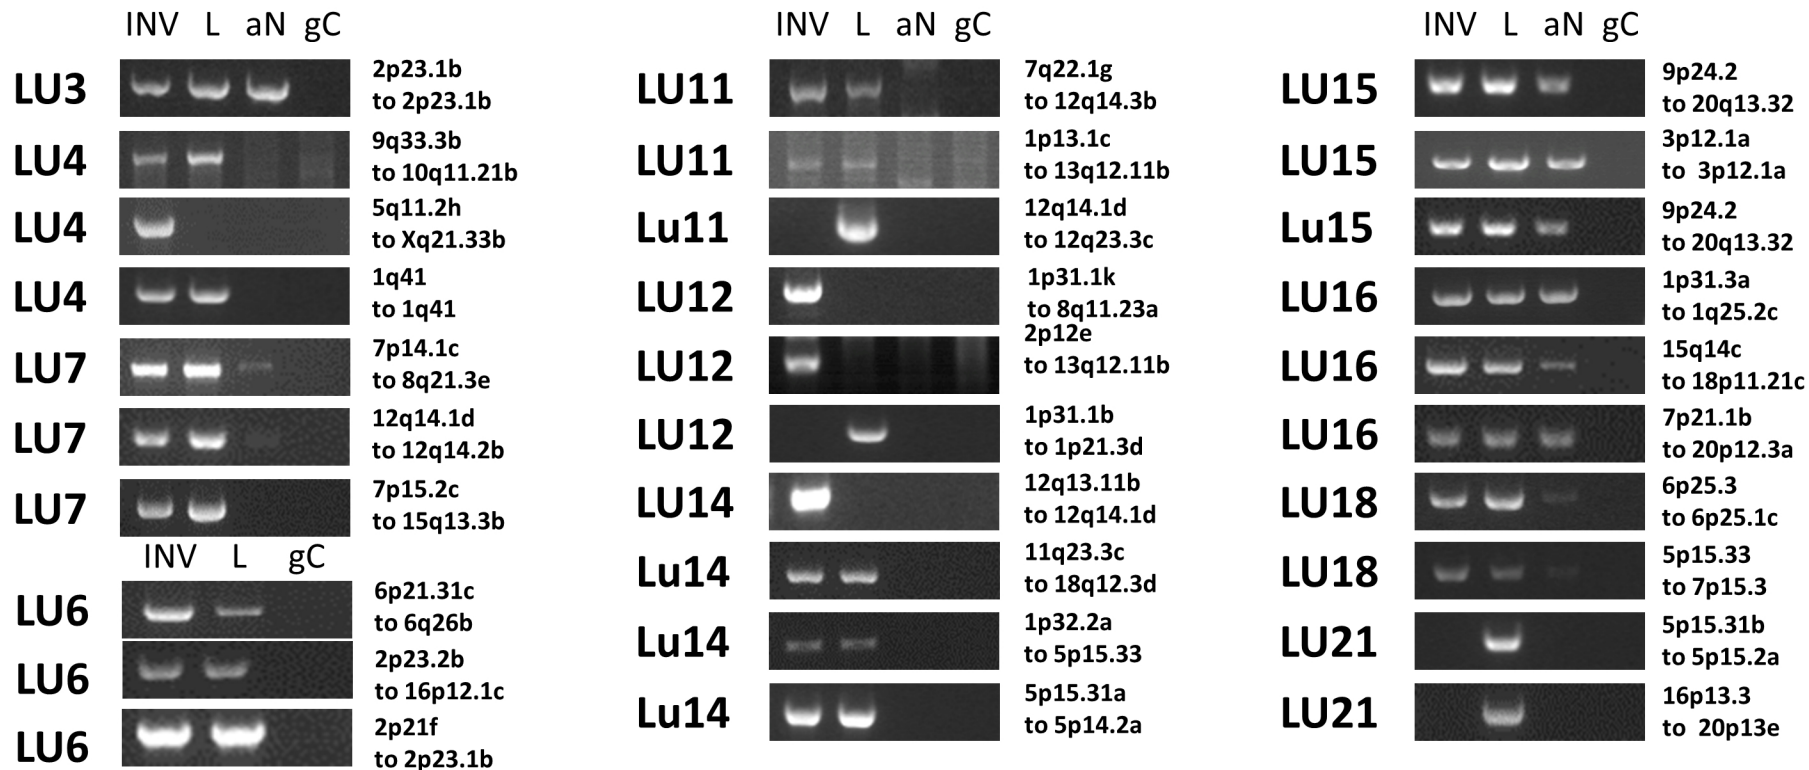

## b. GAPDH – Sample Quantification.

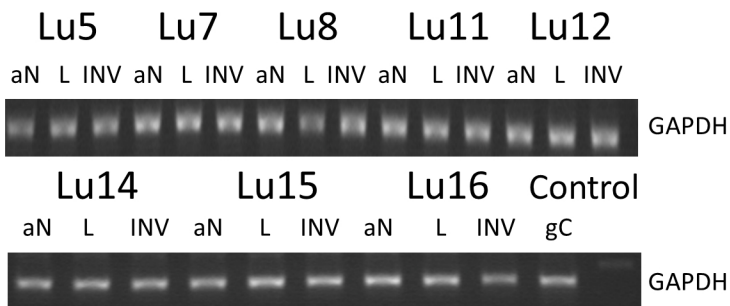

## c. Non-Saturating PCR Lu12: 16q24.1a to 16q24.1a.

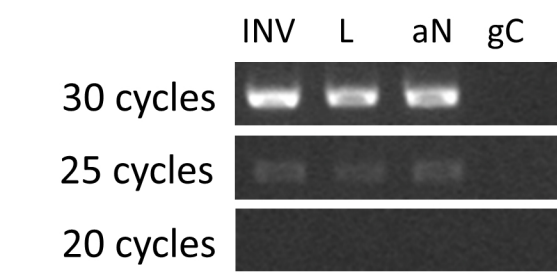

## d. Quantitative PCR Lu15: 9p13.1b to 20q13.31a.

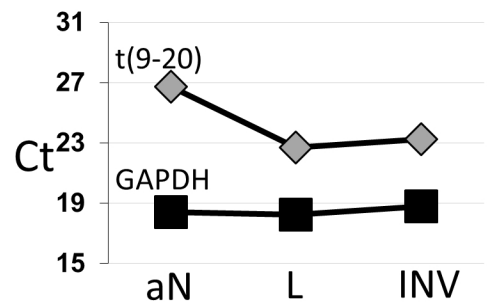

Supplement: NIHMS660173-supplement-s4.pdf [file NIHMS660173-supplement-s4.pdf]
