# Supplementary material
Source: PubMed Central journal article supplement (PMC4399556)
Supplement: NIHMS660173-supplement-st1.pdf [file NIHMS660173-supplement-st1.pdf]

Supplementary Table 1.

| sample    | NGS Platform | # Lanes | Total Reads | Non Mapping<br>(0 hits) | 0 hits % | Replication | Bridged<br>Coverage | bp Coverage |
|-----------|--------------|---------|-------------|-------------------------|----------|-------------|---------------------|-------------|
| LU3_INV   | HiSeq        | 1       | 93,551,937  | 3,086,999               | 3.3      | 40.6        | 40.2                | 3.5         |
| LU3_IS    | HiSeq        | 1       | 105,514,858 | 2,872,155               | 2.7      | 41.4        | 45.4                | 3.9         |
| LU4_INV   | HiSeq        | 1       | 110,035,229 | 3,383,526               | 3.1      | 32.2        | 46.7                | 4.6         |
| LU4_IS    | HiSeq        | 1       | 105,635,100 | 3,095,397               | 2.9      | 46.9        | 39.7                | 3.4         |
| LU05_INV  | HiSeq+       | 0.5     | 73,506,352  | 2,364,282               | 3.2      | 48.4        | 28.1                | 2.5         |
| LU05_IS   | HiSeq+       | 0.5     | 99,574,182  | 2,796,229               | 2.8      | 48.0        | 37.3                | 3.4         |
| LU06_INV  | HiSeq+       | 0.5     | 76,737,923  | 1,422,301               | 1.9      | 82.5        | 10.0                | 0.9         |
| LU06_IS   | HiSeq+       | 0.5     | 69,288,351  | 2,117,179               | 3.1      | 48.8        | 24.8                | 2.3         |
| LU07_INV  | HiSeq+       | 0.5     | 95,150,352  | 3,744,094               | 3.9      | 50.0        | 34.1                | 3.0         |
| LU07_IS   | HiSeq+       | 0.5     | 77,835,171  | 4,319,867               | 5.6      | 36.4        | 31.0                | 3.0         |
| LU08_INV  | HiSeq+       | 0.5     | 72,852,366  | 4,842,825               | 6.6      | 40.2        | 24.0                | 2.6         |
| LU08_IS   | HiSeq+       | 0.5     | 99,822,126  | 4,519,446               | 4.5      | 37.2        | 37.2                | 3.9         |
| LU11_INV  | HiSeq+       | 0.5     | 102,302,098 | 7,980,882               | 7.8      | 44.1        | 27.8                | 3.5         |
| LU11_IS   | HiSeq+       | 0.5     | 15,461,318  | 1,091,642               | 7.1      | 8.0         | 7.7                 | 0.9         |
| LU12_INV  | HiSeq+       | 0.5     | 75,243,391  | 6,767,822               | 9.0      | 31.4        | 27.7                | 3.1         |
| LU12_IS   | HiSeq+       | 0.5     | 80,308,511  | 5,319,598               | 6.6      | 23.7        | 27.6                | 3.7         |
| LU14_INV  | HiSeq+       | 0.5     | 62,513,249  | 4,494,005               | 7.2      | 33.8        | 20.2                | 2.5         |
| LU14_IS   | HiSeq+       | 0.5     | 68,216,914  | 6,074,610               | 8.9      | 36.8        | 25.0                | 2.6         |
| LU15_INV  | HiSeq+       | 0.5     | 67,915,143  | 6,100,583               | 9.0      | 40.3        | 19.1                | 2.5         |
| LU15_IS   | HiSeq+       | 0.5     | 73,088,755  | 6,666,080               | 9.1      | 22.1        | 28.9                | 3.5         |
| LU16_INV  | HiSeq+       | 0.5     | 55,000,796  | 6,215,383               | 11.3     | 16.2        | 22.0                | 2.6         |
| LU16_IS   | HiSeq+       | 0.5     | 62,931,208  | 5,896,540               | 9.4      | 28.2        | 23.1                | 2.7         |
| LU18_INV  | HiSeq+       | 0.5     | 97,640,109  | 5,094,470               | 5.2      | 27.9        | 32.0                | 4.3         |
| LU18_IS   | HiSeq+       | 0.5     | 106,295,054 | 5,260,045               | 4.9      | 22.2        | 36.1                | 5.1         |
| LU20_INVA | HiSeq+       | 0.5     | 115,075,943 | 6,816,738               | 5.9      | 24.5        | 33.3                | 5.3         |
| LU20_IS   | HiSeq+       | 0.5     | 94,918,433  | 5,705,610               | 6.0      | 40.6        | 27.9                | 3.5         |
| LU21_INV  | HiSeq+       | 0.5     | 81,233,484  | 6,366,998               | 7.8      | 24.4        | 29.7                | 3.8         |
| LU21_IS   | HiSeq+       | 0.5     | 105,935,093 | 24,479,150              | 23.1     | 24.4        | 25.3                | 4.1         |

|                  |                   |                  |          |           |           |          |
|------------------|-------------------|------------------|----------|-----------|-----------|----------|
| <b>AVERAGES:</b> | <b>83,699,409</b> | <b>5,317,659</b> | <b>7</b> | <b>36</b> | <b>29</b> | <b>3</b> |
|------------------|-------------------|------------------|----------|-----------|-----------|----------|
