# Supplementary material
Source: PubMed Central journal article supplement (PMC4399556)
Supplement: NIHMS660173-supplement-st2.pdf [file NIHMS660173-supplement-st2.pdf]

| SampleID | #Associated MPs | Chr A | Chr B | Position A  | Position B  | Locus A | Locus B  |
|----------|-----------------|-------|-------|-------------|-------------|---------|----------|
| LU16_L   | 7               | 9     | 9     | 17,810,837  | 17,659,799  | 9p22.2  | 9p22.2   |
| LU14_AD  | 8               | 11    | 18    | 116,537,479 | 41,206,947  | 11q23.3 | 18q12.3  |
| LU18_L   | 4               | 7     | 11    | 23,019,585  | 8,974,407   | 7p15.3  | 11p15.4  |
| LU4_L    | 5               | 9     | 10    | 129,402,935 | 43,626,041  | 9q33.3  | 10q11.21 |
| LU4_L    | 2               | 1     | 1     | 220,206,504 | 220,436,833 | 1q41    | 1q41     |
| LU15_L   | 17              | 3     | 3     | 87,032,778  | 87,065,227  | 3p12.1  | 3p12.1   |
| LU15_AD  | 4               | 3     | 3     | 87,032,778  | 87,065,227  | 3p12.1  | 3p12.1   |
| LU15_L   | 9               | 4     | 22    | 46,968,354  | 29,065,838  | 4p12    | 22q12.1  |
| LU15_AD  | 2               | 4     | 22    | 46,968,296  | 29,065,728  | 4p12    | 22q12.1  |
| LU15_AD  | 7               | 6     | 6     | 163,132,616 | 163,469,612 | 6q26    | 6q26     |
| LU15_L   | 3               | 6     | 6     | 163,132,296 | 163,471,395 | 6q26    | 6q26     |
| LU16_L   | 4               | 7     | 7     | 12,240,895  | 37,243,964  | 7p21.3  | 7p14.1   |
| LU16_L   | 2               | 9     | 9     | 8,308,047   | 17,633,787  | 9p24.1  | 9p22.2   |
| LU16_L   | 2               | 9     | 9     | 8,382,864   | 44,228,869  | 9p24.1  | 9p11.2   |
| LU7_L    | 3               | 10    | 10    | 26,032,905  | 33,022,512  | 10p12.1 | 10p11.22 |
| LU16_L   | 2               | 15    | 18    | 37,285,575  | 13,796,827  | 15q14   | 18p11.21 |
| LU7_L    | 9               | 7     | 15    | 25,535,698  | 32,330,967  | 7p15.2  | 15q13.3  |
| LU15_AD  | 25              | 9     | 9     | 341,257     | 1,853,856   | 9p24.3  | 9p24.3   |
| LU15_L   | 12              | 9     | 9     | 341,611     | 1,854,017   | 9p24.3  | 9p24.3   |
| LU18_AD  | 8               | 5     | 7     | 821,042     | 21,495,954  | 5p15.33 | 7p15.3   |
| LU18_L   | 4               | 5     | 7     | 822,447     | 21,496,140  | 5p15.33 | 7p15.3   |
| LU21_L   | 7               | 16    | 20    | 847,599     | 51,868,943  | 16p13.3 | 20q13.2  |
| LU18_L   | 21              | 6     | 6     | 1,148,107   | 4,882,818   | 6p25.3  | 6p25.1   |
| LU18_AD  | 9               | 6     | 6     | 1,148,879   | 4,882,339   | 6p25.3  | 6p25.1   |
| LU15_L   | 10              | 9     | 20    | 2,574,835   | 58,778,096  | 9p24.2  | 20q13.33 |
| LU15_AD  | 16              | 9     | 20    | 2,810,915   | 56,583,209  | 9p24.2  | 20q13.32 |
| LU15_L   | 7               | 9     | 20    | 2,812,050   | 56,584,482  | 9p24.2  | 20q13.32 |
| LU16_L   | 18              | 5     | 7     | 3,026,617   | 19,206,398  | 5p15.33 | 7p21.1   |
| LU16_AD  | 74              | 5     | 7     | 3,027,779   | 19,206,396  | 5p15.33 | 7p21.1   |
| LU7_AD   | 14              | 7     | 7     | 4,250,651   | 25,361,155  | 7p22.2  | 7p15.3   |
| LU7_L    | 14              | 7     | 7     | 4,251,049   | 25,360,560  | 7p22.2  | 7p15.3   |
| LU21_L   | 11              | 5     | 5     | 7,517,666   | 13,801,629  | 5p15.31 | 5p15.2   |
| LU16_AD  | 45              | 9     | 9     | 8,306,208   | 17,630,619  | 9p24.1  | 9p22.2   |
| LU16_AD  | 19              | 9     | 9     | 8,380,924   | 44,227,709  | 9p24.1  | 9p11.2   |
| LU14_L   | 27              | 5     | 5     | 9,387,351   | 24,484,223  | 5p15.31 | 5p14.2   |
| LU14_AD  | 22              | 5     | 5     | 9,389,717   | 24,484,216  | 5p15.31 | 5p14.2   |
| LU18_AD  | 4               | 5     | 15    | 11,163,957  | 22,168,810  | 5p15.2  | 15q11.2  |
| LU18_L   | 4               | 5     | 15    | 11,164,109  | 22,167,555  | 5p15.2  | 15q11.2  |
| LU16_AD  | 35              | 7     | 7     | 12,237,314  | 37,241,362  | 7p21.3  | 7p14.1   |
| LU16_AD  | 34              | 20    | 20    | 14,893,627  | 15,002,856  | 20p12.1 | 20p12.1  |
| LU16_L   | 23              | 20    | 20    | 14,893,724  | 15,003,097  | 20p12.1 | 20p12.1  |

|          |    |    |    |            |             |          |          |
|----------|----|----|----|------------|-------------|----------|----------|
| LU16_AD  | 16 | 7  | 9  | 15,788,957 | 25,711,677  | 7p21.2   | 9p21.2   |
| LU16_L   | 5  | 7  | 9  | 15,789,248 | 25,711,475  | 7p21.2   | 9p21.2   |
| LU16_AD  | 28 | 9  | 9  | 15,997,279 | 44,233,967  | 9p22.3   | 9p11.2   |
| LU16_L   | 5  | 9  | 9  | 15,999,462 | 44,233,160  | 9p22.3   | 9p11.2   |
| LU11_L   | 5  | 1  | 1  | 16,554,128 | 110,171,291 | 1p36.13  | 1p13.3   |
| LU11_AD  | 11 | 1  | 1  | 16,555,148 | 110,167,882 | 1p36.13  | 1p13.3   |
| LU16_AD  | 11 | 9  | 9  | 17,810,589 | 17,658,331  | 9p22.2   | 9p22.2   |
| LU16_AD  | 30 | 7  | 20 | 18,700,228 | 8,850,324   | 7p21.1   | 20p12.3  |
| LU16_L   | 22 | 7  | 20 | 18,700,769 | 8,850,708   | 7p21.1   | 20p12.3  |
| LU4_AD   | 5  | 7  | 7  | 21,544,327 | 21,588,176  | 7p15.3   | 7p15.3   |
| LU4_L    | 10 | 1  | 16 | 22,843,106 | 62,176,373  | 1p36.12  | 16q21    |
| LU4_AD   | 26 | 1  | 16 | 22,844,213 | 62,174,891  | 1p36.12  | 16q21    |
| LU18_AD  | 12 | 7  | 11 | 23,016,559 | 8,974,736   | 7p15.3   | 11p15.4  |
| LU20_ADb | 12 | 21 | 21 | 24,238,073 | 24,290,171  | 21q21.2  | 21q21.2  |
| LU20_L   | 5  | 21 | 21 | 24,240,354 | 24,290,366  | 21q21.2  | 21q21.2  |
| LU7_AD   | 5  | 10 | 10 | 26,032,737 | 33,022,720  | 10p12.1  | 10p11.22 |
| LU6_L    | 9  | 2  | 16 | 28,454,159 | 24,873,710  | 2p23.2   | 16p12.1  |
| LU6_AD   | 4  | 2  | 16 | 28,459,106 | 24,876,338  | 2p23.2   | 16p12.1  |
| LU6_L    | 15 | 2  | 2  | 29,550,885 | 42,554,761  | 2p23.2   | 2p21     |
| LU6_AD   | 9  | 2  | 2  | 29,551,088 | 42,555,236  | 2p23.2   | 2p21     |
| LU3_L    | 33 | 2  | 2  | 30,807,910 | 30,850,200  | 2p23.1   | 2p23.1   |
| LU3_AD   | 21 | 2  | 2  | 30,807,978 | 30,850,337  | 2p23.1   | 2p23.1   |
| LU11_AD  | 12 | 7  | 12 | 35,145,693 | 66,180,578  | 7p14.2   | 12q14.3  |
| LU6_AD   | 5  | 6  | 6  | 35,209,676 | 163,125,662 | 6p21.31  | 6q26     |
| LU16_AD  | 19 | 7  | 7  | 37,164,951 | 46,084,645  | 7p14.2   | 7p12.3   |
| LU16_L   | 5  | 7  | 7  | 37,167,116 | 46,084,108  | 7p14.2   | 7p12.3   |
| LU16_AD  | 8  | 15 | 18 | 37,281,951 | 13,797,657  | 15q14    | 18p11.21 |
| LU6_L    | 9  | 2  | 2  | 38,172,570 | 42,426,471  | 2p22.2   | 2p21     |
| LU15_L   | 20 | 9  | 20 | 39,193,993 | 56,049,437  | 9p13.1   | 20q13.31 |
| LU15_AD  | 9  | 9  | 20 | 39,194,846 | 56,049,550  | 9p13.1   | 20q13.31 |
| LU5_L    | 20 | 2  | 2  | 40,542,438 | 40,576,474  | 2p22.1   | 2p22.1   |
| LU5_L    | 20 | 2  | 2  | 40,576,474 | 40,542,438  | 2p22.1   | 2p22.1   |
| LU7_AD   | 8  | 7  | 8  | 40,736,377 | 91,451,851  | 7p14.1   | 8q21.3   |
| LU7_L    | 6  | 7  | 8  | 40,737,341 | 91,452,664  | 7p14.1   | 8q21.3   |
| LU6_AD   | 4  | 2  | 2  | 42,504,489 | 28,581,687  | 2p21     | 2p23.2   |
| LU6_L    | 6  | 2  | 2  | 42,504,928 | 28,581,202  | 2p21     | 2p23.2   |
| LU6_L    | 6  | 2  | 2  | 42,505,709 | 30,243,513  | 2p21     | 2p23.1   |
| LU8_AD   | 10 | 1  | 1  | 44,312,571 | 44,342,727  | 1p34.1   | 1p34.1   |
| LU8_L    | 8  | 1  | 1  | 44,313,500 | 44,343,936  | 1p34.1   | 1p34.1   |
| LU16_L   | 5  | 7  | 7  | 46,084,108 | 37,167,116  | 7p12.3   | 7p14.2   |
| LU16_AD  | 19 | 7  | 7  | 46,084,645 | 37,164,951  | 7p12.3   | 7p14.2   |
| LU14_AD  | 15 | 12 | 12 | 48,024,712 | 62,233,799  | 12q13.11 | 12q14.1  |
| LU11_AD  | 18 | 12 | 18 | 48,892,820 | 33,700,767  | 12q13.11 | 18q12.2  |
| LU11_L   | 7  | 12 | 12 | 49,100,538 | 56,554,514  | 12q13.12 | 12q13.2  |

|          |    |    |    |             |             |          |          |
|----------|----|----|----|-------------|-------------|----------|----------|
| LU7_L    | 13 | 12 | 12 | 50,605,720  | 56,553,510  | 12q13.12 | 12q13.2  |
| LU7_AD   | 11 | 12 | 12 | 50,606,910  | 56,548,878  | 12q13.12 | 12q13.2  |
| LU21_L   | 10 | 5  | 5  | 57,922,349  | 60,760,783  | 5q11.2   | 5q12.1   |
| LU21_AD  | 3  | 5  | 5  | 57,924,191  | 60,762,052  | 5q11.2   | 5q12.1   |
| LU14_L   | 5  | 1  | 5  | 58,207,135  | 382,824     | 1p32.2   | 5p15.33  |
| LU14_AD  | 14 | 1  | 5  | 58,212,043  | 378,117     | 1p32.2   | 5p15.33  |
| LU4_AD   | 13 | 5  | 23 | 58,705,286  | 95,389,614  | 5q11.2   | Xq21.33  |
| LU7_L    | 8  | 12 | 12 | 62,222,439  | 64,819,124  | 12q14.1  | 12q14.2  |
| LU7_AD   | 4  | 12 | 12 | 62,224,953  | 64,815,732  | 12q14.1  | 12q14.2  |
| LU11_L   | 6  | 12 | 12 | 62,226,487  | 107,370,009 | 12q14.1  | 12q23.3  |
| LU7_L    | 36 | 12 | 12 | 62,238,172  | 69,070,535  | 12q14.1  | 12q15    |
| LU7_AD   | 20 | 12 | 12 | 62,238,173  | 69,070,485  | 12q14.1  | 12q15    |
| LU16_L   | 4  | 12 | 12 | 64,458,615  | 81,499,617  | 12q14.2  | 12q21.31 |
| LU16_AD  | 36 | 12 | 12 | 64,458,975  | 81,496,923  | 12q14.2  | 12q21.31 |
| LU16_L   | 14 | 1  | 1  | 68,105,195  | 179,096,259 | 1p31.3   | 1q25.2   |
| LU16_AD  | 6  | 1  | 1  | 68,105,687  | 179,096,417 | 1p31.3   | 1q25.2   |
| LU12_AD  | 5  | 1  | 8  | 70,669,783  | 52,658,862  | 1p31.1   | 8q11.23  |
| LU12_AD  | 8  | 2  | 13 | 78,998,352  | 21,237,228  | 2p12     | 13q12.11 |
| LU16_AD  | 18 | 12 | 14 | 81,494,081  | 67,312,537  | 12q21.31 | 14q23.3  |
| LU12_L   | 20 | 1  | 1  | 82,304,737  | 95,352,590  | 1p31.1   | 1p21.3   |
| LU12_L   | 9  | 16 | 16 | 84,812,202  | 84,907,115  | 16q24.1  | 16q24.1  |
| LU12_AD  | 13 | 16 | 16 | 84,812,350  | 84,908,385  | 16q24.1  | 16q24.1  |
| LU14_L   | 10 | 14 | 14 | 94,815,797  | 94,961,627  | 14q32.13 | 14q32.13 |
| LU14_AD  | 10 | 14 | 14 | 94,816,150  | 94,962,623  | 14q32.13 | 14q32.13 |
| LU20_ADb | 9  | 14 | 14 | 100,854,358 | 100,924,665 | 14q32.2  | 14q32.2  |
| LU20_L   | 6  | 14 | 14 | 100,854,426 | 100,925,440 | 14q32.2  | 14q32.2  |
| LU11_AD  | 6  | 7  | 12 | 102,839,170 | 66,179,474  | 7q22.1   | 12q14.3  |
| LU14_L   | 6  | 11 | 18 | 112,024,650 | 60,928,545  | 11q23.1  | 18q21.33 |
| LU14_AD  | 4  | 11 | 18 | 112,027,682 | 60,927,738  | 11q23.1  | 18q21.33 |
| LU14_L   | 9  | 11 | 18 | 116,534,389 | 41,202,388  | 11q23.3  | 18q12.3  |
| LU4_AD   | 13 | 9  | 10 | 129,401,997 | 43,624,198  | 9q33.3   | 10q11.21 |
| LU4_AD   | 7  | 5  | 5  | 158,613,190 | 166,902,741 | 5q33.3   | 5q34     |
| LU4_L    | 16 | 3  | 3  | 163,868,461 | 163,930,258 | 3q26.1   | 3q26.1   |
| LU4_AD   | 11 | 3  | 3  | 163,869,007 | 163,931,476 | 3q26.1   | 3q26.1   |
| LU14_L   | 7  | 1  | 1  | 166,166,750 | 174,933,818 | 1q24.1   | 1q25.1   |
| LU14_AD  | 18 | 1  | 1  | 166,167,904 | 174,933,021 | 1q24.1   | 1q25.1   |
| LU4_AD   | 15 | 6  | 6  | 166,457,616 | 166,747,376 | 6q27     | 6q27     |
| LU3_AD   | 15 | 1  | 1  | 169,308,180 | 197,253,236 | 1q24.2   | 1q31.3   |
| LU3_L    | 8  | 1  | 1  | 169,308,357 | 197,255,014 | 1q24.2   | 1q31.3   |
| LU14_AD  | 18 | 1  | 1  | 174,933,021 | 166,167,904 | 1q25.1   | 1q24.1   |
| LU14_L   | 7  | 1  | 1  | 174,933,818 | 166,166,750 | 1q25.1   | 1q24.1   |
| LU7_L    | 17 | 1  | 16 | 185,445,329 | 7,036,260   | 1q25.3   | 16p13.3  |
| LU7_AD   | 8  | 1  | 16 | 185,446,341 | 7,042,190   | 1q25.3   | 16p13.3  |
| LU14_AD  | 6  | 1  | 22 | 208,266,490 | 28,616,068  | 1q32.2   | 22q12.1  |

| LU4_AD  | 6  | 1  | 1  | 220,203,979 | 220,434,022 | 1q41     | 1q41     |
|---------|----|----|----|-------------|-------------|----------|----------|
| LU4_AD  | 3  | 4  | 1  | 12,626      | 48,315,958  | 4p16.3   | 1p33     |
| LU18_L  | 36 | 4  | 5  | 12,893      | 520,041     | 4p16.3   | 5p15.33  |
| LU18_AD | 27 | 4  | 5  | 12,918      | 519,452     | 4p16.3   | 5p15.33  |
| LU20_AD | 3  | 18 | 12 | 46,338      | 34,315,131  | 18p11.32 | 12p11.1  |
| LU18_AD | 5  | 4  | 12 | 66,667      | 65,181,915  | 4p16.3   | 12q14.3  |
| LU15_AD | 3  | 5  | 5  | 67,270      | 115,317     | 5p15.33  | 5p15.33  |
| LU4_AD  | 13 | 7  | 7  | 77,157      | 44,299,564  | 7p22.3   | 7p13     |
| LU7_AD  | 4  | 7  | 7  | 77,854      | 22,900,555  | 7p22.3   | 7p15.3   |
| LU21_L  | 3  | 4  | 19 | 87,123      | 22,937,430  | 4p16.3   | 19p12    |
| LU14_AD | 5  | 18 | 1  | 107,045     | 144,966,629 | 18p11.32 | 1q21.1   |
| LU4_AD  | 3  | 1  | 1  | 114,440     | 174,022     | 1p36.33  | 1p36.33  |
| LU15_AD | 3  | 5  | 5  | 115,317     | 67,270      | 5p15.33  | 5p15.33  |
| LU12_AD | 3  | 8  | 15 | 119,738     | 102,494,133 | 8p23.3   | 15q26.3  |
| LU8_L   | 4  | 4  | 18 | 127,335     | 14,123,187  | 4p16.3   | 18p11.21 |
| LU15_L  | 3  | 9  | 9  | 134,036     | 2,392,461   | 9p24.3   | 9p24.2   |
| LU4_AD  | 5  | 6  | 1  | 149,281     | 48,315,482  | 6p25.3   | 1p33     |
| LU4_L   | 3  | 9  | 9  | 157,521     | 70,462,393  | 9p24.3   | 9q21.11  |
| LU4_AD  | 3  | 1  | 1  | 174,022     | 114,440     | 1p36.33  | 1p36.33  |
| LU7_L   | 6  | 7  | 7  | 181,319     | 37,341,357  | 7p22.3   | 7p14.1   |
| LU4_AD  | 13 | 11 | 1  | 191,196     | 48,314,688  | 11p15.5  | 1p33     |
| LU4_L   | 10 | 11 | 1  | 191,492     | 48,314,716  | 11p15.5  | 1p33     |
| LU4_AD  | 5  | 16 | 16 | 202,449     | 61,268,802  | 16p13.3  | 16q21    |
| LU4_AD  | 4  | 16 | 5  | 207,022     | 169,941,847 | 16p13.3  | 5q35.1   |
| LU12_L  | 3  | 19 | 4  | 211,211     | 119,539,508 | 19p13.3  | 4q26     |
| LU21_AD | 5  | 7  | 1  | 213,872     | 550,599     | 7p22.3   | 1p36.33  |
| LU6_L   | 4  | 12 | 1  | 216,467     | 152,452,425 | 12p13.33 | 1q21.3   |
| LU7_AD  | 3  | 19 | 4  | 225,556     | 119,524,869 | 19p13.3  | 4q26     |
| LU4_AD  | 14 | 1  | 1  | 231,205     | 48,313,516  | 1p36.33  | 1p33     |
| LU3_L   | 3  | 1  | 4  | 253,565     | 165,178,108 | 1p36.33  | 4q32.3   |
| LU20_AD | 4  | 2  | 1  | 277,906     | 233,970,940 | 2p25.3   | 1q42.2   |
| LU4_L   | 23 | 3  | 3  | 279,434     | 318,816     | 3p26.3   | 3p26.3   |
| LU4_AD  | 21 | 3  | 3  | 279,758     | 318,888     | 3p26.3   | 3p26.3   |
| LU4_L   | 23 | 3  | 3  | 318,816     | 279,434     | 3p26.3   | 3p26.3   |
| LU4_AD  | 21 | 3  | 3  | 318,888     | 279,758     | 3p26.3   | 3p26.3   |
| LU4_AD  | 4  | 1  | 1  | 337,369     | 222,686,567 | 1p36.33  | 1q41     |
| LU4_AD  | 5  | 1  | 3  | 338,891     | 197,913,518 | 1p36.33  | 3q29     |
| LU14_AD | 14 | 5  | 1  | 378,117     | 58,212,043  | 5p15.33  | 1p32.2   |
| LU14_L  | 5  | 5  | 1  | 382,824     | 58,207,135  | 5p15.33  | 1p32.2   |
| LU15_AD | 3  | 7  | 7  | 385,078     | 424,416     | 7p22.3   | 7p22.3   |
| LU20_L  | 3  | 1  | 15 | 392,517     | 102,478,589 | 1p36.33  | 15q26.3  |
| LU8_L   | 5  | 3  | 3  | 414,223     | 443,975     | 3p26.3   | 3p26.3   |
| LU15_AD | 3  | 7  | 7  | 424,416     | 385,078     | 7p22.3   | 7p22.3   |
| LU8_L   | 5  | 3  | 3  | 443,975     | 414,223     | 3p26.3   | 3p26.3   |

|         |     |    |    |         |             |         |          |
|---------|-----|----|----|---------|-------------|---------|----------|
| LU7_AD  | 3   | 5  | 10 | 470,395 | 102,143,065 | 5p15.33 | 10q24.31 |
| LU12_AD | 4   | 4  | 4  | 503,992 | 538,177     | 4p16.3  | 4p16.3   |
| LU18_AD | 27  | 5  | 4  | 519,452 | 12,918      | 5p15.33 | 4p16.3   |
| LU18_L  | 36  | 5  | 4  | 520,041 | 12,893      | 5p15.33 | 4p16.3   |
| LU18_L  | 83  | 5  | 5  | 531,221 | 27,532,549  | 5p15.33 | 5p14.1   |
| LU18_AD | 103 | 5  | 5  | 533,109 | 27,528,281  | 5p15.33 | 5p14.1   |
| LU18_AD | 23  | 5  | 12 | 536,886 | 69,513,985  | 5p15.33 | 12q15    |
| LU18_L  | 22  | 5  | 12 | 537,600 | 69,514,020  | 5p15.33 | 12q15    |
| LU12_AD | 4   | 4  | 4  | 538,177 | 503,992     | 4p16.3  | 4p16.3   |
| LU18_L  | 9   | 5  | 15 | 541,225 | 20,591,197  | 5p15.33 | 15q11.1  |
| LU18_AD | 4   | 5  | 5  | 542,125 | 671,481     | 5p15.33 | 5p15.33  |
| LU18_AD | 11  | 5  | 5  | 542,268 | 667,657     | 5p15.33 | 5p15.33  |
| LU18_L  | 14  | 5  | 5  | 542,507 | 667,172     | 5p15.33 | 5p15.33  |
| LU18_AD | 34  | 5  | 12 | 543,683 | 63,933,251  | 5p15.33 | 12q14.2  |
| LU18_L  | 24  | 5  | 12 | 544,248 | 63,933,248  | 5p15.33 | 12q14.2  |
| LU18_L  | 12  | 5  | 12 | 546,743 | 69,532,842  | 5p15.33 | 12q15    |
| LU21_AD | 5   | 1  | 7  | 550,599 | 213,872     | 1p36.33 | 7p22.3   |
| LU18_AD | 3   | 5  | 5  | 551,433 | 27,527,513  | 5p15.33 | 5p14.1   |
| LU18_L  | 15  | 5  | 12 | 566,401 | 68,834,858  | 5p15.33 | 12q15    |
| LU18_AD | 13  | 5  | 12 | 566,584 | 68,834,970  | 5p15.33 | 12q15    |
| LU18_AD | 3   | 5  | 5  | 572,799 | 917,471     | 5p15.33 | 5p15.33  |
| LU18_AD | 5   | 5  | 5  | 573,271 | 916,509     | 5p15.33 | 5p15.33  |
| LU18_AD | 3   | 5  | 5  | 573,598 | 917,416     | 5p15.33 | 5p15.33  |
| LU18_AD | 3   | 5  | 5  | 573,777 | 915,033     | 5p15.33 | 5p15.33  |
| LU18_AD | 37  | 5  | 12 | 600,125 | 71,196,018  | 5p15.33 | 12q15    |
| LU18_L  | 45  | 5  | 12 | 600,771 | 71,195,834  | 5p15.33 | 12q15    |
| LU18_AD | 3   | 5  | 12 | 612,987 | 69,501,341  | 5p15.33 | 12q15    |
| LU18_AD | 17  | 5  | 12 | 615,924 | 68,442,186  | 5p15.33 | 12q15    |
| LU18_L  | 26  | 5  | 12 | 616,074 | 68,443,146  | 5p15.33 | 12q15    |
| LU18_AD | 8   | 5  | 15 | 624,268 | 22,746,067  | 5p15.33 | 15q11.2  |
| LU18_AD | 40  | 5  | 12 | 633,095 | 67,571,123  | 5p15.33 | 12q14.3  |
| LU18_L  | 6   | 5  | 12 | 648,405 | 69,491,295  | 5p15.33 | 12q15    |
| LU18_AD | 3   | 5  | 12 | 649,322 | 69,490,926  | 5p15.33 | 12q15    |
| LU18_AD | 8   | 5  | 12 | 660,515 | 71,244,421  | 5p15.33 | 12q15    |
| LU18_L  | 3   | 5  | 12 | 660,998 | 71,244,110  | 5p15.33 | 12q15    |
| LU18_L  | 4   | 5  | 12 | 661,114 | 66,773,619  | 5p15.33 | 12q14.3  |
| LU18_AD | 4   | 5  | 12 | 661,420 | 66,772,978  | 5p15.33 | 12q14.3  |
| LU20_AD | 3   | 1  | 3  | 664,882 | 197,918,637 | 1p36.33 | 3q29     |
| LU18_L  | 14  | 5  | 5  | 667,172 | 542,507     | 5p15.33 | 5p15.33  |
| LU18_AD | 7   | 5  | 15 | 667,266 | 20,590,632  | 5p15.33 | 15q11.1  |
| LU18_AD | 11  | 5  | 5  | 667,657 | 542,268     | 5p15.33 | 5p15.33  |
| LU18_AD | 4   | 5  | 5  | 671,481 | 542,125     | 5p15.33 | 5p15.33  |
| LU18_AD | 6   | 5  | 12 | 674,277 | 70,727,402  | 5p15.33 | 12q15    |
| LU11_AD | 3   | 10 | 10 | 681,232 | 719,800     | 10p15.3 | 10p15.3  |

|         |    |    |    |         |             |          |          |
|---------|----|----|----|---------|-------------|----------|----------|
| LU18_L  | 21 | 5  | 15 | 685,504 | 20,003,985  | 5p15.33  | 15q11.1  |
| LU18_AD | 22 | 5  | 15 | 686,514 | 20,004,172  | 5p15.33  | 15q11.1  |
| LU18_L  | 6  | 5  | 12 | 689,580 | 67,824,430  | 5p15.33  | 12q15    |
| LU18_AD | 5  | 5  | 12 | 690,448 | 67,825,530  | 5p15.33  | 12q15    |
| LU18_L  | 10 | 5  | 5  | 692,288 | 1,345,520   | 5p15.33  | 5p15.33  |
| LU18_AD | 74 | 5  | 12 | 698,259 | 71,220,679  | 5p15.33  | 12q15    |
| LU18_L  | 74 | 5  | 12 | 698,536 | 71,220,646  | 5p15.33  | 12q15    |
| LU18_AD | 20 | 5  | 12 | 708,756 | 71,190,350  | 5p15.33  | 12q15    |
| LU18_L  | 22 | 5  | 12 | 711,988 | 71,187,983  | 5p15.33  | 12q15    |
| LU16_AD | 34 | 5  | 7  | 716,442 | 11,220,305  | 5p15.33  | 7p21.3   |
| LU16_L  | 15 | 5  | 7  | 716,988 | 11,221,089  | 5p15.33  | 7p21.3   |
| LU11_AD | 3  | 10 | 10 | 719,800 | 681,232     | 10p15.3  | 10p15.3  |
| LU18_AD | 3  | 5  | 7  | 731,049 | 21,496,042  | 5p15.33  | 7p15.3   |
| LU18_AD | 8  | 5  | 15 | 741,481 | 46,973,072  | 5p15.33  | 15q21.1  |
| LU18_L  | 5  | 5  | 15 | 743,212 | 46,973,575  | 5p15.33  | 15q21.1  |
| LU18_L  | 14 | 5  | 15 | 751,751 | 40,732,617  | 5p15.33  | 15q15.1  |
| LU18_L  | 38 | 5  | 5  | 756,879 | 26,025,229  | 5p15.33  | 5p14.1   |
| LU18_AD | 46 | 5  | 5  | 757,025 | 26,024,522  | 5p15.33  | 5p14.1   |
| LU18_AD | 15 | 5  | 12 | 767,603 | 69,985,077  | 5p15.33  | 12q15    |
| LU18_L  | 23 | 5  | 12 | 768,539 | 69,984,073  | 5p15.33  | 12q15    |
| LU18_AD | 29 | 5  | 15 | 773,034 | 37,240,871  | 5p15.33  | 15q14    |
| LU4_AD  | 3  | 20 | 23 | 773,607 | 148,957,855 | 20p13    | Xq28     |
| LU18_L  | 24 | 5  | 15 | 777,043 | 37,236,463  | 5p15.33  | 15q14    |
| LU18_AD | 4  | 5  | 15 | 778,666 | 20,004,450  | 5p15.33  | 15q11.1  |
| LU18_AD | 8  | 5  | 12 | 789,969 | 71,220,800  | 5p15.33  | 12q15    |
| LU18_AD | 3  | 5  | 12 | 797,879 | 71,187,371  | 5p15.33  | 12q15    |
| LU16_AD | 5  | 5  | 7  | 801,515 | 11,220,508  | 5p15.33  | 7p21.3   |
| LU7_L   | 3  | 1  | 10 | 802,915 | 135,506,367 | 1p36.33  | 10q26.3  |
| LU18_AD | 4  | 5  | 7  | 822,348 | 26,971,109  | 5p15.33  | 7p15.2   |
| LU21_L  | 3  | 16 | 16 | 847,884 | 5,164,061   | 16p13.3  | 16p13.3  |
| LU16_L  | 5  | 5  | 5  | 851,119 | 882,142     | 5p15.33  | 5p15.33  |
| LU18_AD | 3  | 5  | 5  | 859,440 | 908,330     | 5p15.33  | 5p15.33  |
| LU11_AD | 8  | 18 | 18 | 865,374 | 1,037,798   | 18p11.32 | 18p11.32 |
| LU18_AD | 6  | 5  | 15 | 873,571 | 37,181,252  | 5p15.33  | 15q14    |
| LU18_L  | 4  | 5  | 15 | 874,833 | 37,179,914  | 5p15.33  | 15q14    |
| LU6_L   | 7  | 1  | 11 | 876,006 | 113,117,768 | 1p36.33  | 11q23.2  |
| LU6_AD  | 6  | 1  | 11 | 877,326 | 113,116,372 | 1p36.33  | 11q23.2  |
| LU18_AD | 15 | 5  | 12 | 877,387 | 69,985,429  | 5p15.33  | 12q15    |
| LU18_L  | 14 | 5  | 12 | 877,479 | 69,984,753  | 5p15.33  | 12q15    |
| LU16_L  | 5  | 5  | 5  | 882,142 | 851,119     | 5p15.33  | 5p15.33  |
| LU18_AD | 20 | 5  | 12 | 891,047 | 67,803,224  | 5p15.33  | 12q15    |
| LU18_L  | 15 | 5  | 12 | 891,237 | 67,803,303  | 5p15.33  | 12q15    |
| LU3_L   | 6  | 3  | 2  | 894,344 | 65,111,009  | 3p26.3   | 2p14     |
| LU18_AD | 3  | 5  | 5  | 908,330 | 859,440     | 5p15.33  | 5p15.33  |

|         |    |    |    |           |             |          |          |
|---------|----|----|----|-----------|-------------|----------|----------|
| LU18_AD | 14 | 5  | 12 | 912,009   | 58,216,636  | 5p15.33  | 12q14.1  |
| LU18_L  | 11 | 5  | 12 | 912,090   | 58,217,077  | 5p15.33  | 12q14.1  |
| LU18_AD | 11 | 5  | 12 | 914,913   | 70,972,560  | 5p15.33  | 12q15    |
| LU18_AD | 3  | 5  | 5  | 915,033   | 573,777     | 5p15.33  | 5p15.33  |
| LU18_L  | 16 | 5  | 12 | 915,040   | 70,972,572  | 5p15.33  | 12q15    |
| LU18_AD | 5  | 5  | 5  | 916,509   | 573,271     | 5p15.33  | 5p15.33  |
| LU15_L  | 5  | 2  | 10 | 917,156   | 130,722,642 | 2p25.3   | 10q26.3  |
| LU18_AD | 3  | 5  | 5  | 917,416   | 573,598     | 5p15.33  | 5p15.33  |
| LU18_AD | 3  | 5  | 5  | 917,471   | 572,799     | 5p15.33  | 5p15.33  |
| LU18_L  | 15 | 5  | 5  | 992,986   | 4,884,130   | 5p15.33  | 5p15.32  |
| LU18_AD | 20 | 5  | 5  | 994,099   | 4,884,036   | 5p15.33  | 5p15.32  |
| LU18_L  | 12 | 5  | 12 | 1,008,524 | 63,584,320  | 5p15.33  | 12q14.2  |
| LU18_AD | 14 | 5  | 12 | 1,009,042 | 63,584,827  | 5p15.33  | 12q14.2  |
| LU18_L  | 85 | 5  | 5  | 1,017,481 | 1,930,100   | 5p15.33  | 5p15.33  |
| LU18_AD | 76 | 5  | 5  | 1,018,348 | 1,930,190   | 5p15.33  | 5p15.33  |
| LU11_AD | 28 | 18 | 18 | 1,022,900 | 5,204,385   | 18p11.32 | 18p11.31 |
| LU18_L  | 10 | 5  | 12 | 1,034,578 | 71,274,490  | 5p15.33  | 12q15    |
| LU18_AD | 5  | 5  | 12 | 1,035,190 | 71,274,178  | 5p15.33  | 12q15    |
| LU11_AD | 8  | 18 | 18 | 1,037,798 | 865,374     | 18p11.32 | 18p11.32 |
| LU18_L  | 7  | 5  | 12 | 1,073,578 | 70,975,421  | 5p15.33  | 12q15    |
| LU18_AD | 5  | 5  | 12 | 1,074,215 | 70,976,755  | 5p15.33  | 12q15    |
| LU18_AD | 3  | 5  | 12 | 1,078,794 | 69,787,639  | 5p15.33  | 12q15    |
| LU18_L  | 8  | 5  | 5  | 1,081,481 | 2,193,321   | 5p15.33  | 5p15.33  |
| LU18_L  | 8  | 5  | 15 | 1,081,484 | 20,885,972  | 5p15.33  | 15q11.2  |
| LU18_AD | 4  | 5  | 5  | 1,104,732 | 1,604,153   | 5p15.33  | 5p15.33  |
| LU18_L  | 5  | 5  | 5  | 1,105,185 | 1,604,587   | 5p15.33  | 5p15.33  |
| LU18_L  | 11 | 5  | 12 | 1,121,349 | 69,332,949  | 5p15.33  | 12q15    |
| LU18_AD | 18 | 5  | 5  | 1,125,987 | 2,559,973   | 5p15.33  | 5p15.33  |
| LU18_L  | 15 | 5  | 5  | 1,126,065 | 2,559,541   | 5p15.33  | 5p15.33  |
| LU18_AD | 70 | 5  | 12 | 1,132,839 | 67,715,757  | 5p15.33  | 12q15    |
| LU18_L  | 79 | 5  | 12 | 1,132,896 | 67,716,629  | 5p15.33  | 12q15    |
| LU18_AD | 24 | 5  | 12 | 1,134,039 | 65,768,507  | 5p15.33  | 12q14.3  |
| LU18_L  | 25 | 5  | 12 | 1,134,838 | 65,768,650  | 5p15.33  | 12q14.3  |
| LU18_L  | 46 | 5  | 12 | 1,149,256 | 69,483,640  | 5p15.33  | 12q15    |
| LU18_AD | 44 | 5  | 12 | 1,149,936 | 69,481,147  | 5p15.33  | 12q15    |
| LU18_L  | 19 | 5  | 12 | 1,153,164 | 71,060,341  | 5p15.33  | 12q15    |
| LU18_AD | 74 | 5  | 12 | 1,156,048 | 70,111,687  | 5p15.33  | 12q15    |
| LU18_L  | 54 | 5  | 12 | 1,156,123 | 70,111,975  | 5p15.33  | 12q15    |
| LU18_AD | 10 | 5  | 12 | 1,156,958 | 71,057,053  | 5p15.33  | 12q15    |
| LU18_AD | 24 | 5  | 12 | 1,185,326 | 67,098,733  | 5p15.33  | 12q14.3  |
| LU18_L  | 20 | 5  | 12 | 1,186,424 | 67,098,890  | 5p15.33  | 12q14.3  |
| LU18_L  | 19 | 5  | 5  | 1,196,588 | 1,263,360   | 5p15.33  | 5p15.33  |
| LU18_AD | 18 | 5  | 5  | 1,197,462 | 1,262,788   | 5p15.33  | 5p15.33  |
| LU18_AD | 12 | 5  | 1  | 1,206,184 | 143,389,562 | 5p15.33  | 1q21.1   |

|         |     |    |    |           |             |          |          |
|---------|-----|----|----|-----------|-------------|----------|----------|
| LU18_L  | 9   | 5  | 1  | 1,206,187 | 143,389,674 | 5p15.33  | 1q21.1   |
| LU18_AD | 20  | 5  | 1  | 1,206,232 | 142,838,166 | 5p15.33  | 1q21.1   |
| LU18_L  | 23  | 5  | 25 | 1,206,294 | 570,517     | 5p15.33  | 25       |
| LU18_L  | 5   | 5  | 1  | 1,206,339 | 142,701,075 | 5p15.33  | 1q21.1   |
| LU18_L  | 6   | 5  | 25 | 1,206,350 | 163,355     | 5p15.33  | 25       |
| LU18_AD | 21  | 5  | 25 | 1,206,472 | 570,534     | 5p15.33  | 25       |
| LU18_L  | 15  | 5  | 1  | 1,206,607 | 142,837,623 | 5p15.33  | 1q21.1   |
| LU18_AD | 3   | 5  | 4  | 1,206,987 | 49,491,069  | 5p15.33  | 4p11     |
| LU18_AD | 10  | 5  | 5  | 1,228,672 | 1,262,797   | 5p15.33  | 5p15.33  |
| LU20_AD | 3   | 9  | 9  | 1,234,151 | 1,264,038   | 9p24.3   | 9p24.3   |
| LU18_AD | 18  | 5  | 5  | 1,262,788 | 1,197,462   | 5p15.33  | 5p15.33  |
| LU18_AD | 10  | 5  | 5  | 1,262,797 | 1,228,672   | 5p15.33  | 5p15.33  |
| LU18_L  | 19  | 5  | 5  | 1,263,360 | 1,196,588   | 5p15.33  | 5p15.33  |
| LU20_AD | 3   | 9  | 9  | 1,264,038 | 1,234,151   | 9p24.3   | 9p24.3   |
| LU18_L  | 22  | 5  | 12 | 1,272,543 | 71,477,717  | 5p15.33  | 12q15    |
| LU18_AD | 32  | 5  | 12 | 1,272,945 | 71,474,763  | 5p15.33  | 12q15    |
| LU18_AD | 154 | 5  | 5  | 1,311,231 | 4,214,854   | 5p15.33  | 5p15.33  |
| LU18_L  | 137 | 5  | 5  | 1,314,110 | 4,214,933   | 5p15.33  | 5p15.33  |
| LU11_AD | 7   | 18 | 18 | 1,332,773 | 5,328,689   | 18p11.32 | 18p11.31 |
| LU18_L  | 5   | 5  | 15 | 1,340,329 | 22,918,340  | 5p15.33  | 15q11.2  |
| LU18_AD | 5   | 5  | 15 | 1,340,380 | 22,918,240  | 5p15.33  | 15q11.2  |
| LU18_L  | 10  | 5  | 5  | 1,345,520 | 692,288     | 5p15.33  | 5p15.33  |
| LU18_L  | 5   | 5  | 5  | 1,357,551 | 1,432,438   | 5p15.33  | 5p15.33  |
| LU18_AD | 4   | 5  | 5  | 1,368,730 | 1,889,832   | 5p15.33  | 5p15.33  |
| LU18_AD | 3   | 5  | 5  | 1,371,010 | 1,890,263   | 5p15.33  | 5p15.33  |
| LU18_AD | 4   | 5  | 5  | 1,383,805 | 1,878,340   | 5p15.33  | 5p15.33  |
| LU18_L  | 4   | 5  | 5  | 1,384,150 | 1,879,638   | 5p15.33  | 5p15.33  |
| LU7_L   | 3   | 7  | 7  | 1,391,180 | 1,654,074   | 7p22.3   | 7p22.3   |
| LU18_L  | 4   | 5  | 7  | 1,399,292 | 146,849,957 | 5p15.33  | 7q35     |
| LU12_L  | 8   | 8  | 8  | 1,422,744 | 65,889,530  | 8p23.3   | 8q12.3   |
| LU18_AD | 12  | 5  | 5  | 1,425,436 | 2,038,312   | 5p15.33  | 5p15.33  |
| LU18_L  | 11  | 5  | 5  | 1,425,450 | 2,040,776   | 5p15.33  | 5p15.33  |
| LU12_L  | 15  | 8  | 8  | 1,426,628 | 128,456,563 | 8p23.3   | 8q24.21  |
| LU18_L  | 17  | 5  | 5  | 1,427,067 | 20,438,704  | 5p15.33  | 5p14.3   |
| LU18_AD | 20  | 5  | 5  | 1,427,984 | 20,438,135  | 5p15.33  | 5p14.3   |
| LU18_L  | 5   | 5  | 5  | 1,432,438 | 1,357,551   | 5p15.33  | 5p15.33  |
| LU18_L  | 3   | 5  | 12 | 1,444,537 | 70,255,023  | 5p15.33  | 12q15    |
| LU18_L  | 5   | 5  | 12 | 1,447,881 | 69,175,757  | 5p15.33  | 12q15    |
| LU11_AD | 12  | 18 | 18 | 1,510,047 | 5,096,416   | 18p11.32 | 18p11.31 |
| LU5_AD  | 3   | 10 | 10 | 1,538,000 | 1,569,982   | 10p15.3  | 10p15.3  |
| LU5_AD  | 3   | 10 | 10 | 1,569,982 | 1,538,000   | 10p15.3  | 10p15.3  |
| LU18_AD | 6   | 5  | 3  | 1,578,543 | 184,731,057 | 5p15.33  | 3q27.2   |
| LU18_AD | 3   | 5  | 4  | 1,578,831 | 74,236,597  | 5p15.33  | 4q13.3   |
| LU8_L   | 3   | 5  | 4  | 1,579,275 | 74,234,453  | 5p15.33  | 4q13.3   |



|         |    |    |    |           |             |          |          |
|---------|----|----|----|-----------|-------------|----------|----------|
| LU18_AD | 4  | 5  | 14 | 1,579,368 | 103,705,008 | 5p15.33  | 14q32.32 |
| LU18_L  | 14 | 5  | 4  | 1,579,402 | 127,055,732 | 5p15.33  | 4q28.1   |
| LU18_L  | 5  | 5  | 10 | 1,580,032 | 132,089,348 | 5p15.33  | 10q26.3  |
| LU18_L  | 4  | 5  | 4  | 1,580,785 | 92,618,075  | 5p15.33  | 4q22.1   |
| LU18_L  | 3  | 5  | 8  | 1,585,090 | 47,191,805  | 5p15.33  | 8q11.1   |
| LU18_AD | 4  | 5  | 5  | 1,604,153 | 1,104,732   | 5p15.33  | 5p15.33  |
| LU18_L  | 5  | 5  | 5  | 1,604,587 | 1,105,185   | 5p15.33  | 5p15.33  |
| LU18_L  | 14 | 5  | 3  | 1,613,472 | 73,114,729  | 5p15.33  | 3p13     |
| LU18_AD | 12 | 5  | 3  | 1,613,503 | 73,112,801  | 5p15.33  | 3p13     |
| LU16_AD | 13 | 5  | 7  | 1,616,951 | 29,756,227  | 5p15.33  | 7p14.3   |
| LU16_L  | 10 | 5  | 7  | 1,617,617 | 29,754,840  | 5p15.33  | 7p14.3   |
| LU18_L  | 16 | 5  | 12 | 1,632,163 | 67,132,476  | 5p15.33  | 12q14.3  |
| LU18_AD | 26 | 5  | 12 | 1,632,929 | 67,129,761  | 5p15.33  | 12q14.3  |
| LU7_L   | 3  | 7  | 7  | 1,654,074 | 1,391,180   | 7p22.3   | 7p22.3   |
| LU21_L  | 5  | 18 | 20 | 1,672,161 | 54,825,378  | 18p11.32 | 20q13.2  |
| LU4_L   | 8  | 16 | 16 | 1,722,558 | 64,006,946  | 16p13.3  | 16q21    |
| LU16_L  | 7  | 5  | 7  | 1,723,953 | 13,498,507  | 5p15.33  | 7p21.3   |
| LU4_AD  | 25 | 16 | 16 | 1,724,150 | 64,004,909  | 16p13.3  | 16q21    |
| LU16_AD | 39 | 5  | 7  | 1,727,588 | 13,493,241  | 5p15.33  | 7p21.3   |
| LU18_L  | 31 | 5  | 5  | 1,729,318 | 2,332,673   | 5p15.33  | 5p15.33  |
| LU18_AD | 22 | 5  | 5  | 1,729,768 | 2,332,600   | 5p15.33  | 5p15.33  |
| LU16_AD | 60 | 5  | 7  | 1,732,585 | 11,335,694  | 5p15.33  | 7p21.3   |
| LU16_L  | 9  | 5  | 7  | 1,732,844 | 11,338,142  | 5p15.33  | 7p21.3   |
| LU16_AD | 4  | 5  | 7  | 1,738,863 | 16,516,173  | 5p15.33  | 7p21.1   |
| LU16_AD | 9  | 5  | 1  | 1,753,356 | 142,667,341 | 5p15.33  | 1q21.1   |
| LU18_AD | 3  | 5  | 12 | 1,768,300 | 71,265,516  | 5p15.33  | 12q15    |
| LU16_AD | 40 | 5  | 7  | 1,792,205 | 46,079,623  | 5p15.33  | 7p12.3   |
| LU16_L  | 5  | 5  | 7  | 1,796,862 | 46,079,607  | 5p15.33  | 7p12.3   |
| LU16_AD | 5  | 5  | 7  | 1,797,157 | 15,749,341  | 5p15.33  | 7p21.2   |
| LU20_AD | 3  | 12 | 2  | 1,823,755 | 47,329,949  | 12p13.33 | 2p21     |
| LU16_AD | 7  | 5  | 20 | 1,840,851 | 2,512,873   | 5p15.33  | 20p13    |
| LU16_L  | 6  | 5  | 20 | 1,842,731 | 2,513,700   | 5p15.33  | 20p13    |
| LU15_AD | 25 | 9  | 9  | 1,853,856 | 341,257     | 9p24.3   | 9p24.3   |
| LU15_L  | 12 | 9  | 9  | 1,854,017 | 341,611     | 9p24.3   | 9p24.3   |
| LU18_AD | 4  | 5  | 5  | 1,878,340 | 1,383,805   | 5p15.33  | 5p15.33  |
| LU18_L  | 4  | 5  | 5  | 1,879,638 | 1,384,150   | 5p15.33  | 5p15.33  |
| LU18_AD | 4  | 5  | 5  | 1,889,832 | 1,368,730   | 5p15.33  | 5p15.33  |
| LU18_AD | 3  | 5  | 5  | 1,890,263 | 1,371,010   | 5p15.33  | 5p15.33  |
| LU20_AD | 4  | 4  | 12 | 1,923,432 | 40,353,936  | 4p16.3   | 12q12    |
| LU18_L  | 85 | 5  | 5  | 1,930,100 | 1,017,481   | 5p15.33  | 5p15.33  |
| LU18_AD | 76 | 5  | 5  | 1,930,190 | 1,018,348   | 5p15.33  | 5p15.33  |
| LU18_L  | 17 | 5  | 5  | 2,014,381 | 2,089,873   | 5p15.33  | 5p15.33  |
| LU18_AD | 13 | 5  | 5  | 2,015,742 | 2,092,012   | 5p15.33  | 5p15.33  |
| LU18_AD | 4  | 5  | 5  | 2,016,598 | 2,090,436   | 5p15.33  | 5p15.33  |

|         |    |    |    |           |             |          |          |
|---------|----|----|----|-----------|-------------|----------|----------|
| LU4_AD  | 27 | 1  | 16 | 2,035,656 | 69,737,043  | 1p36.33  | 16q22.1  |
| LU4_L   | 19 | 1  | 16 | 2,036,448 | 69,736,454  | 1p36.33  | 16q22.1  |
| LU18_AD | 12 | 5  | 5  | 2,038,312 | 1,425,436   | 5p15.33  | 5p15.33  |
| LU18_L  | 11 | 5  | 5  | 2,040,776 | 1,425,450   | 5p15.33  | 5p15.33  |
| LU18_AD | 74 | 5  | 12 | 2,057,753 | 67,795,485  | 5p15.33  | 12q15    |
| LU18_L  | 67 | 5  | 12 | 2,058,241 | 67,796,636  | 5p15.33  | 12q15    |
| LU5_AD  | 3  | 2  | 2  | 2,059,445 | 2,092,789   | 2p25.3   | 2p25.3   |
| LU18_L  | 71 | 5  | 5  | 2,083,138 | 2,587,550   | 5p15.33  | 5p15.33  |
| LU18_AD | 80 | 5  | 5  | 2,083,978 | 2,587,935   | 5p15.33  | 5p15.33  |
| LU21_AD | 3  | 6  | 6  | 2,089,167 | 2,120,742   | 6p25.3   | 6p25.3   |
| LU18_L  | 17 | 5  | 5  | 2,089,873 | 2,014,381   | 5p15.33  | 5p15.33  |
| LU18_AD | 4  | 5  | 5  | 2,090,436 | 2,016,598   | 5p15.33  | 5p15.33  |
| LU18_AD | 13 | 5  | 5  | 2,092,012 | 2,015,742   | 5p15.33  | 5p15.33  |
| LU5_AD  | 3  | 2  | 2  | 2,092,789 | 2,059,445   | 2p25.3   | 2p25.3   |
| LU21_AD | 3  | 6  | 6  | 2,120,742 | 2,089,167   | 6p25.3   | 6p25.3   |
| LU7_L   | 7  | 7  | 12 | 2,178,343 | 58,665,692  | 7p22.3   | 12q14.1  |
| LU18_L  | 15 | 5  | 15 | 2,192,717 | 20,885,998  | 5p15.33  | 15q11.2  |
| LU18_L  | 8  | 5  | 5  | 2,193,321 | 1,081,481   | 5p15.33  | 5p15.33  |
| LU18_AD | 10 | 5  | 15 | 2,193,450 | 20,885,587  | 5p15.33  | 15q11.2  |
| LU4_AD  | 4  | 7  | 7  | 2,209,522 | 2,294,631   | 7p22.3   | 7p22.3   |
| LU4_AD  | 10 | 7  | 23 | 2,209,919 | 84,393,892  | 7p22.3   | Xq21.1   |
| LU18_L  | 17 | 5  | 5  | 2,221,577 | 2,589,686   | 5p15.33  | 5p15.33  |
| LU18_AD | 11 | 5  | 5  | 2,224,550 | 2,585,856   | 5p15.33  | 5p15.33  |
| LU18_AD | 17 | 5  | 5  | 2,227,256 | 2,831,836   | 5p15.33  | 5p15.33  |
| LU18_L  | 18 | 5  | 5  | 2,227,759 | 2,831,058   | 5p15.33  | 5p15.33  |
| LU14_L  | 10 | 12 | 12 | 2,229,551 | 2,260,197   | 12p13.33 | 12p13.33 |
| LU18_AD | 78 | 5  | 5  | 2,246,734 | 2,285,074   | 5p15.33  | 5p15.33  |
| LU18_L  | 20 | 5  | 5  | 2,249,195 | 2,284,822   | 5p15.33  | 5p15.33  |
| LU18_L  | 53 | 5  | 5  | 2,251,610 | 2,285,114   | 5p15.33  | 5p15.33  |
| LU14_L  | 10 | 12 | 12 | 2,260,197 | 2,229,551   | 12p13.33 | 12p13.33 |
| LU18_L  | 20 | 5  | 5  | 2,284,822 | 2,249,195   | 5p15.33  | 5p15.33  |
| LU18_AD | 78 | 5  | 5  | 2,285,074 | 2,246,734   | 5p15.33  | 5p15.33  |
| LU18_L  | 53 | 5  | 5  | 2,285,114 | 2,251,610   | 5p15.33  | 5p15.33  |
| LU4_AD  | 4  | 7  | 7  | 2,294,631 | 2,209,522   | 7p22.3   | 7p22.3   |
| LU4_AD  | 3  | 6  | 1  | 2,307,055 | 247,872,399 | 6p25.2   | 1q44     |
| LU21_L  | 3  | 6  | 4  | 2,314,700 | 92,965,289  | 6p25.2   | 4q22.1   |
| LU18_AD | 6  | 11 | 7  | 2,317,489 | 22,961,612  | 11p15.5  | 7p15.3   |
| LU18_AD | 22 | 5  | 5  | 2,332,600 | 1,729,768   | 5p15.33  | 5p15.33  |
| LU18_L  | 31 | 5  | 5  | 2,332,673 | 1,729,318   | 5p15.33  | 5p15.33  |
| LU18_AD | 10 | 11 | 12 | 2,380,674 | 75,446,462  | 11p15.5  | 12q21.1  |
| LU18_L  | 9  | 11 | 12 | 2,381,189 | 75,446,258  | 11p15.5  | 12q21.1  |
| LU15_L  | 3  | 9  | 9  | 2,392,461 | 134,036     | 9p24.2   | 9p24.3   |
| LU18_L  | 3  | 5  | 5  | 2,398,069 | 2,454,906   | 5p15.33  | 5p15.33  |
| LU18_L  | 5  | 5  | 5  | 2,403,624 | 2,460,268   | 5p15.33  | 5p15.33  |

|         |    |    |    |           |             |         |          |
|---------|----|----|----|-----------|-------------|---------|----------|
| LU18_L  | 3  | 5  | 5  | 2,454,906 | 2,398,069   | 5p15.33 | 5p15.33  |
| LU18_L  | 5  | 5  | 5  | 2,460,268 | 2,403,624   | 5p15.33 | 5p15.33  |
| LU15_L  | 7  | 9  | 9  | 2,472,867 | 31,385,771  | 9p24.2  | 9p21.1   |
| LU14_AD | 4  | 5  | 14 | 2,473,432 | 95,200,473  | 5p15.33 | 14q32.13 |
| LU14_L  | 3  | 5  | 14 | 2,473,953 | 95,199,013  | 5p15.33 | 14q32.13 |
| LU15_L  | 3  | 9  | 20 | 2,481,256 | 59,315,490  | 9p24.2  | 20q13.33 |
| LU14_AD | 11 | 5  | 15 | 2,481,699 | 68,580,449  | 5p15.33 | 15q23    |
| LU14_L  | 6  | 5  | 15 | 2,482,154 | 68,580,056  | 5p15.33 | 15q23    |
| LU16_AD | 7  | 20 | 5  | 2,512,873 | 1,840,851   | 20p13   | 5p15.33  |
| LU16_L  | 6  | 20 | 5  | 2,513,700 | 1,842,731   | 20p13   | 5p15.33  |
| LU18_AD | 26 | 5  | 12 | 2,520,786 | 69,306,554  | 5p15.33 | 12q15    |
| LU18_L  | 44 | 5  | 12 | 2,524,107 | 69,307,567  | 5p15.33 | 12q15    |
| LU18_L  | 50 | 5  | 12 | 2,525,335 | 67,035,186  | 5p15.33 | 12q14.3  |
| LU18_AD | 48 | 5  | 12 | 2,525,895 | 67,035,327  | 5p15.33 | 12q14.3  |
| LU7_AD  | 5  | 20 | 14 | 2,527,625 | 73,357,682  | 20p13   | 14q24.2  |
| LU7_L   | 10 | 20 | 14 | 2,532,334 | 73,361,574  | 20p13   | 14q24.2  |
| LU18_L  | 15 | 5  | 5  | 2,559,541 | 1,126,065   | 5p15.33 | 5p15.33  |
| LU18_AD | 18 | 5  | 5  | 2,559,973 | 1,125,987   | 5p15.33 | 5p15.33  |
| LU7_AD  | 8  | 7  | 12 | 2,585,586 | 68,275,994  | 7p22.3  | 12q15    |
| LU18_AD | 11 | 5  | 5  | 2,585,856 | 2,224,550   | 5p15.33 | 5p15.33  |
| LU7_L   | 14 | 7  | 12 | 2,585,968 | 68,276,387  | 7p22.3  | 12q15    |
| LU18_L  | 71 | 5  | 5  | 2,587,550 | 2,083,138   | 5p15.33 | 5p15.33  |
| LU18_AD | 80 | 5  | 5  | 2,587,935 | 2,083,978   | 5p15.33 | 5p15.33  |
| LU18_L  | 17 | 5  | 5  | 2,589,686 | 2,221,577   | 5p15.33 | 5p15.33  |
| LU7_L   | 7  | 7  | 12 | 2,600,065 | 64,216,120  | 7p22.3  | 12q14.2  |
| LU7_L   | 4  | 7  | 7  | 2,602,033 | 16,045,939  | 7p22.3  | 7p21.2   |
| LU18_L  | 34 | 5  | 12 | 2,603,674 | 69,312,446  | 5p15.33 | 12q15    |
| LU18_AD | 32 | 5  | 12 | 2,603,682 | 69,311,333  | 5p15.33 | 12q15    |
| LU4_AD  | 3  | 11 | 11 | 2,605,176 | 2,642,433   | 11p15.5 | 11p15.5  |
| LU18_L  | 28 | 5  | 4  | 2,639,660 | 49,312,237  | 5p15.33 | 4p11     |
| LU18_AD | 6  | 5  | 4  | 2,639,746 | 49,516,834  | 5p15.33 | 4p11     |
| LU18_L  | 23 | 5  | 2  | 2,639,919 | 162,138,215 | 5p15.33 | 2q24.2   |
| LU18_AD | 13 | 5  | 2  | 2,640,017 | 162,138,146 | 5p15.33 | 2q24.2   |
| LU18_L  | 8  | 5  | 2  | 2,640,074 | 133,040,171 | 5p15.33 | 2q21.2   |
| LU18_L  | 4  | 5  | 21 | 2,640,271 | 9,829,462   | 5p15.33 | 21p11.2  |
| LU18_AD | 22 | 5  | 1  | 2,640,272 | 143,283,169 | 5p15.33 | 1q21.1   |
| LU18_L  | 9  | 5  | 19 | 2,640,292 | 44,913,952  | 5p15.33 | 19q13.31 |
| LU18_L  | 17 | 5  | 1  | 2,640,302 | 143,283,183 | 5p15.33 | 1q21.1   |
| LU18_AD | 10 | 5  | 19 | 2,640,505 | 44,913,976  | 5p15.33 | 19q13.31 |
| LU18_AD | 23 | 5  | 4  | 2,640,891 | 49,311,102  | 5p15.33 | 4p11     |
| LU18_AD | 7  | 5  | 2  | 2,641,089 | 133,040,160 | 5p15.33 | 2q21.2   |
| LU18_L  | 8  | 5  | 4  | 2,641,303 | 49,515,019  | 5p15.33 | 4p11     |
| LU4_AD  | 3  | 11 | 11 | 2,642,433 | 2,605,176   | 11p15.5 | 11p15.5  |
| LU3_L   | 3  | 9  | 9  | 2,663,162 | 2,693,465   | 9p24.2  | 9p24.2   |

|         |     |    |    |           |             |          |          |
|---------|-----|----|----|-----------|-------------|----------|----------|
| LU3_L   | 3   | 9  | 9  | 2,693,465 | 2,663,162   | 9p24.2   | 9p24.2   |
| LU18_AD | 14  | 5  | 5  | 2,727,901 | 4,436,945   | 5p15.33  | 5p15.33  |
| LU18_L  | 26  | 5  | 5  | 2,729,989 | 4,435,385   | 5p15.33  | 5p15.33  |
| LU18_AD | 4   | 5  | 12 | 2,735,709 | 66,440,788  | 5p15.33  | 12q14.3  |
| LU7_L   | 3   | 3  | 3  | 2,747,698 | 2,783,037   | 3p26.3   | 3p26.3   |
| LU3_L   | 3   | 24 | 11 | 2,754,821 | 61,816,741  | Yp11.31  | 11q12.3  |
| LU7_L   | 4   | 7  | 7  | 2,757,643 | 145,136,762 | 7p22.3   | 7q35     |
| LU18_AD | 5   | 2  | 2  | 2,759,179 | 7,300,090   | 2p25.3   | 2p25.1   |
| LU7_L   | 3   | 3  | 3  | 2,783,037 | 2,747,698   | 3p26.3   | 3p26.3   |
| LU18_L  | 14  | 5  | 12 | 2,813,708 | 69,892,725  | 5p15.33  | 12q15    |
| LU18_AD | 17  | 5  | 12 | 2,814,435 | 69,892,598  | 5p15.33  | 12q15    |
| LU18_AD | 4   | 5  | 12 | 2,822,963 | 64,208,194  | 5p15.33  | 12q14.2  |
| LU7_AD  | 4   | 12 | 20 | 2,829,911 | 19,660,383  | 12p13.33 | 20p11.23 |
| LU18_L  | 18  | 5  | 5  | 2,831,058 | 2,227,759   | 5p15.33  | 5p15.33  |
| LU18_AD | 17  | 5  | 5  | 2,831,836 | 2,227,256   | 5p15.33  | 5p15.33  |
| LU18_AD | 40  | 5  | 12 | 2,852,013 | 70,665,956  | 5p15.33  | 12q15    |
| LU18_L  | 45  | 5  | 12 | 2,852,446 | 70,665,897  | 5p15.33  | 12q15    |
| LU18_AD | 56  | 5  | 12 | 2,879,340 | 67,079,638  | 5p15.33  | 12q14.3  |
| LU18_L  | 15  | 5  | 12 | 2,881,087 | 64,806,729  | 5p15.33  | 12q14.2  |
| LU18_AD | 6   | 5  | 12 | 2,881,400 | 64,806,576  | 5p15.33  | 12q14.2  |
| LU18_L  | 44  | 5  | 12 | 2,881,540 | 67,077,350  | 5p15.33  | 12q14.3  |
| LU18_L  | 5   | 5  | 15 | 2,890,848 | 29,064,814  | 5p15.33  | 15q13.1  |
| LU18_L  | 104 | 5  | 12 | 2,922,988 | 69,080,467  | 5p15.33  | 12q15    |
| LU18_AD | 92  | 5  | 12 | 2,923,426 | 69,080,472  | 5p15.33  | 12q15    |
| LU4_AD  | 5   | 10 | 10 | 2,950,164 | 2,981,456   | 10p15.3  | 10p15.3  |
| LU4_AD  | 3   | 23 | 7  | 2,971,512 | 19,361,067  | Xp22.33  | 7p21.1   |
| LU12_L  | 12  | 8  | 8  | 2,974,570 | 134,958,983 | 8p23.2   | 8q24.22  |
| LU12_L  | 15  | 8  | 8  | 2,975,819 | 104,706,094 | 8p23.2   | 8q22.3   |
| LU4_AD  | 5   | 10 | 10 | 2,981,456 | 2,950,164   | 10p15.3  | 10p15.3  |
| LU16_AD | 75  | 5  | 7  | 3,022,173 | 15,770,672  | 5p15.33  | 7p21.2   |
| LU16_L  | 13  | 5  | 7  | 3,022,637 | 15,770,932  | 5p15.33  | 7p21.2   |
| LU4_AD  | 4   | 23 | 7  | 3,052,483 | 12,609,099  | Xp22.33  | 7p21.3   |
| LU4_AD  | 5   | 2  | 2  | 3,083,838 | 3,114,759   | 2p25.3   | 2p25.3   |
| LU4_AD  | 9   | 7  | 7  | 3,087,878 | 7,755,924   | 7p22.2   | 7p21.3   |
| LU4_AD  | 10  | 23 | 7  | 3,089,196 | 34,775,379  | Xp22.33  | 7p14.3   |
| LU11_AD | 3   | 8  | 21 | 3,098,843 | 27,603,204  | 8p23.2   | 21q21.3  |
| LU4_AD  | 6   | 7  | 7  | 3,110,811 | 3,660,414   | 7p22.2   | 7p22.2   |
| LU4_AD  | 5   | 2  | 2  | 3,114,759 | 3,083,838   | 2p25.3   | 2p25.3   |
| LU4_AD  | 6   | 7  | 23 | 3,123,033 | 86,034,537  | 7p22.2   | Xq21.2   |
| LU18_L  | 7   | 11 | 11 | 3,245,419 | 6,791,450   | 11p15.4  | 11p15.4  |
| LU18_AD | 3   | 11 | 11 | 3,247,140 | 6,792,232   | 11p15.4  | 11p15.4  |
| LU18_AD | 6   | 11 | 11 | 3,249,463 | 6,816,121   | 11p15.4  | 11p15.4  |
| LU18_L  | 6   | 11 | 11 | 3,251,286 | 6,815,514   | 11p15.4  | 11p15.4  |
| LU4_L   | 5   | 16 | 1  | 3,266,841 | 153,073,736 | 16p13.3  | 1q21.3   |

|         |     |    |    |           |             |          |          |
|---------|-----|----|----|-----------|-------------|----------|----------|
| LU4_AD  | 8   | 7  | 7  | 3,310,248 | 3,631,116   | 7p22.2   | 7p22.2   |
| LU18_AD | 3   | 5  | 2  | 3,323,691 | 239,393,785 | 5p15.33  | 2q37.3   |
| LU21_AD | 3   | 10 | 10 | 3,360,574 | 3,392,870   | 10p15.2  | 10p15.2  |
| LU21_AD | 3   | 10 | 10 | 3,392,870 | 3,360,574   | 10p15.2  | 10p15.2  |
| LU12_AD | 3   | 11 | 4  | 3,405,615 | 3,901,102   | 11p15.4  | 4p16.3   |
| LU12_AD | 3   | 20 | 5  | 3,420,813 | 37,574,850  | 20p13    | 5p13.2   |
| LU12_L  | 4   | 20 | 5  | 3,420,905 | 37,574,926  | 20p13    | 5p13.2   |
| LU3_AD  | 5   | 9  | 9  | 3,476,124 | 3,508,236   | 9p24.2   | 9p24.2   |
| LU3_AD  | 5   | 9  | 9  | 3,508,236 | 3,476,124   | 9p24.2   | 9p24.2   |
| LU11_AD | 3   | 11 | 8  | 3,596,434 | 11,866,809  | 11p15.4  | 8p23.1   |
| LU4_AD  | 7   | 7  | 7  | 3,597,635 | 5,751,300   | 7p22.2   | 7p22.1   |
| LU3_AD  | 3   | 6  | 6  | 3,602,442 | 3,634,827   | 6p25.2   | 6p25.2   |
| LU21_AD | 5   | 11 | 4  | 3,614,359 | 3,888,006   | 11p15.4  | 4p16.3   |
| LU4_AD  | 8   | 7  | 7  | 3,631,116 | 3,310,248   | 7p22.2   | 7p22.2   |
| LU3_AD  | 3   | 6  | 6  | 3,634,827 | 3,602,442   | 6p25.2   | 6p25.2   |
| LU4_AD  | 13  | 7  | 7  | 3,647,248 | 7,750,242   | 7p22.2   | 7p21.3   |
| LU4_AD  | 6   | 7  | 7  | 3,660,414 | 3,110,811   | 7p22.2   | 7p22.2   |
| LU18_L  | 5   | 23 | 23 | 3,735,743 | 3,848,602   | Xp22.33  | Xp22.33  |
| LU3_L   | 5   | 12 | 6  | 3,746,597 | 14,387,555  | 12p13.32 | 6p23     |
| LU18_L  | 5   | 23 | 23 | 3,848,602 | 3,735,743   | Xp22.33  | Xp22.33  |
| LU4_AD  | 3   | 4  | 12 | 3,883,047 | 8,559,786   | 4p16.3   | 12p13.31 |
| LU21_L  | 4   | 4  | 8  | 3,883,418 | 6,939,920   | 4p16.3   | 8p23.1   |
| LU21_AD | 5   | 4  | 11 | 3,888,006 | 3,614,359   | 4p16.3   | 11p15.4  |
| LU12_AD | 3   | 4  | 11 | 3,901,102 | 3,405,615   | 4p16.3   | 11p15.4  |
| LU18_AD | 10  | 8  | 7  | 3,943,200 | 27,156,624  | 8p23.2   | 7p15.2   |
| LU18_L  | 17  | 8  | 7  | 3,943,249 | 27,157,716  | 8p23.2   | 7p15.2   |
| LU18_L  | 13  | 8  | 5  | 3,952,442 | 16,169,472  | 8p23.2   | 5p15.1   |
| LU18_AD | 17  | 8  | 5  | 3,952,589 | 16,169,668  | 8p23.2   | 5p15.1   |
| LU4_AD  | 3   | 4  | 5  | 4,047,721 | 40,107,508  | 4p16.3   | 5p13.1   |
| LU4_AD  | 3   | 6  | 6  | 4,103,577 | 4,146,878   | 6p25.2   | 6p25.2   |
| LU12_L  | 4   | 4  | 16 | 4,115,879 | 5,259,210   | 4p16.3   | 16p13.3  |
| LU18_L  | 3   | 4  | 3  | 4,130,246 | 8,728,437   | 4p16.3   | 3p25.3   |
| LU4_AD  | 3   | 4  | 2  | 4,133,528 | 159,707,493 | 4p16.3   | 2q24.1   |
| LU4_L   | 4   | 4  | 3  | 4,134,397 | 8,716,432   | 4p16.3   | 3p25.3   |
| LU4_AD  | 3   | 6  | 6  | 4,146,878 | 4,103,577   | 6p25.2   | 6p25.2   |
| LU18_AD | 3   | 4  | 4  | 4,167,116 | 9,101,248   | 4p16.3   | 4p16.1   |
| LU18_AD | 3   | 4  | 9  | 4,175,441 | 93,504,404  | 4p16.3   | 9q22.2   |
| LU4_AD  | 12  | 16 | 16 | 4,179,466 | 62,133,074  | 16p13.3  | 16q21    |
| LU4_L   | 13  | 16 | 16 | 4,180,489 | 62,131,211  | 16p13.3  | 16q21    |
| LU7_L   | 8   | 11 | 22 | 4,183,044 | 24,551,019  | 11p15.4  | 22q11.23 |
| LU7_AD  | 5   | 11 | 22 | 4,183,238 | 24,549,099  | 11p15.4  | 22q11.23 |
| LU3_L   | 3   | 11 | 11 | 4,185,052 | 4,225,106   | 11p15.4  | 11p15.4  |
| LU18_AD | 154 | 5  | 5  | 4,214,854 | 1,311,231   | 5p15.33  | 5p15.33  |
| LU18_L  | 137 | 5  | 5  | 4,214,933 | 1,314,110   | 5p15.33  | 5p15.33  |

|         |     |    |    |           |             |          |          |
|---------|-----|----|----|-----------|-------------|----------|----------|
| LU3_L   | 3   | 11 | 11 | 4,225,106 | 4,185,052   | 11p15.4  | 11p15.4  |
| LU20_AD | 3   | 1  | 3  | 4,246,967 | 97,911,418  | 1p36.32  | 3q11.2   |
| LU3_L   | 3   | 23 | 24 | 4,251,303 | 19,278,782  | Xp22.33  | Yq11.221 |
| LU21_L  | 6   | 4  | 2  | 4,311,051 | 91,854,945  | 4p16.3   | 2p11.1   |
| LU16_L  | 5   | 20 | 7  | 4,377,366 | 29,748,368  | 20p13    | 7p14.3   |
| LU16_AD | 6   | 20 | 7  | 4,378,577 | 29,748,533  | 20p13    | 7p14.3   |
| LU20_AD | 6   | 6  | 2  | 4,384,733 | 128,795,121 | 6p25.1   | 2q14.3   |
| LU18_AD | 11  | 5  | 5  | 4,389,458 | 4,425,271   | 5p15.33  | 5p15.33  |
| LU18_AD | 11  | 5  | 5  | 4,425,271 | 4,389,458   | 5p15.33  | 5p15.33  |
| LU18_L  | 26  | 5  | 5  | 4,435,385 | 2,729,989   | 5p15.33  | 5p15.33  |
| LU18_AD | 14  | 5  | 5  | 4,436,945 | 2,727,901   | 5p15.33  | 5p15.33  |
| LU7_L   | 3   | 20 | 20 | 4,452,895 | 4,485,381   | 20p13    | 20p13    |
| LU7_L   | 3   | 20 | 20 | 4,485,381 | 4,452,895   | 20p13    | 20p13    |
| LU18_AD | 35  | 11 | 5  | 4,513,664 | 19,870,748  | 11p15.4  | 5p14.3   |
| LU18_L  | 38  | 11 | 5  | 4,514,363 | 19,870,009  | 11p15.4  | 5p14.3   |
| LU14_L  | 3   | 5  | 25 | 4,519,848 | 2,438,234   | 5p15.32  | 25       |
| LU14_AD | 24  | 5  | 1  | 4,521,840 | 144,965,042 | 5p15.32  | 1q21.1   |
| LU14_AD | 43  | 5  | 1  | 4,522,098 | 144,689,265 | 5p15.32  | 1q21.1   |
| LU14_L  | 11  | 5  | 1  | 4,522,777 | 144,964,958 | 5p15.32  | 1q21.1   |
| LU14_L  | 31  | 5  | 1  | 4,523,015 | 144,689,520 | 5p15.32  | 1q21.1   |
| LU14_AD | 4   | 5  | 25 | 4,523,792 | 969,640     | 5p15.32  | 25       |
| LU18_L  | 68  | 11 | 11 | 4,525,068 | 30,744,514  | 11p15.4  | 11p14.1  |
| LU18_AD | 107 | 11 | 11 | 4,527,626 | 30,741,184  | 11p15.4  | 11p14.1  |
| LU18_L  | 5   | 11 | 12 | 4,530,266 | 73,387,926  | 11p15.4  | 12q21.1  |
| LU18_AD | 4   | 11 | 7  | 4,530,546 | 16,519,573  | 11p15.4  | 7p21.1   |
| LU18_L  | 4   | 11 | 7  | 4,531,374 | 16,520,255  | 11p15.4  | 7p21.1   |
| LU14_L  | 32  | 5  | 1  | 4,532,365 | 145,062,086 | 5p15.32  | 1q21.1   |
| LU14_AD | 16  | 5  | 1  | 4,532,761 | 145,062,116 | 5p15.32  | 1q21.1   |
| LU14_AD | 24  | 5  | 1  | 4,532,766 | 145,065,327 | 5p15.32  | 1q21.1   |
| LU14_AD | 7   | 5  | 1  | 4,537,275 | 144,825,492 | 5p15.32  | 1q21.1   |
| LU3_AD  | 3   | 2  | 2  | 4,549,040 | 4,581,332   | 2p25.2   | 2p25.2   |
| LU3_AD  | 3   | 2  | 2  | 4,581,332 | 4,549,040   | 2p25.2   | 2p25.2   |
| LU6_AD  | 8   | 1  | 1  | 4,616,031 | 5,244,550   | 1p36.32  | 1p36.32  |
| LU6_L   | 3   | 1  | 1  | 4,616,166 | 5,245,962   | 1p36.32  | 1p36.32  |
| LU21_AD | 6   | 7  | 7  | 4,640,434 | 35,913,697  | 7p22.1   | 7p14.2   |
| LU4_AD  | 5   | 18 | 6  | 4,683,590 | 84,155,026  | 18p11.31 | 6q14.2   |
| LU4_L   | 4   | 3  | 3  | 4,738,588 | 4,769,880   | 3p26.1   | 3p26.1   |
| LU21_L  | 7   | 5  | 5  | 4,755,839 | 52,949,889  | 5p15.32  | 5q11.2   |
| LU7_AD  | 6   | 7  | 12 | 4,756,196 | 65,092,345  | 7p22.1   | 12q14.2  |
| LU7_L   | 7   | 7  | 12 | 4,756,431 | 65,092,105  | 7p22.1   | 12q14.2  |
| LU4_L   | 4   | 18 | 18 | 4,764,731 | 5,656,148   | 18p11.31 | 18p11.31 |
| LU4_L   | 4   | 3  | 3  | 4,769,880 | 4,738,588   | 3p26.1   | 3p26.1   |
| LU18_AD | 5   | 5  | 12 | 4,783,868 | 71,295,902  | 5p15.32  | 12q15    |
| LU18_AD | 6   | 5  | 12 | 4,784,833 | 64,268,838  | 5p15.32  | 12q14.2  |

|         |    |    |    |           |             |          |          |
|---------|----|----|----|-----------|-------------|----------|----------|
| LU20_AD | 4  | 6  | 6  | 4,796,553 | 4,829,543   | 6p25.1   | 6p25.1   |
| LU20_AD | 4  | 6  | 6  | 4,829,543 | 4,796,553   | 6p25.1   | 6p25.1   |
| LU4_AD  | 3  | 3  | 3  | 4,829,984 | 4,862,324   | 3p26.1   | 3p26.1   |
| LU16_L  | 10 | 20 | 20 | 4,860,399 | 5,120,151   | 20p13    | 20p12.3  |
| LU16_AD | 14 | 20 | 20 | 4,861,984 | 5,120,280   | 20p13    | 20p12.3  |
| LU4_AD  | 3  | 3  | 3  | 4,862,324 | 4,829,984   | 3p26.1   | 3p26.1   |
| LU16_L  | 9  | 20 | 25 | 4,863,273 | 1,604,958   | 20p13    | 25       |
| LU16_AD | 8  | 20 | 25 | 4,864,836 | 1,603,342   | 20p13    | 25       |
| LU18_AD | 9  | 6  | 6  | 4,882,339 | 1,148,879   | 6p25.1   | 6p25.3   |
| LU18_L  | 21 | 6  | 6  | 4,882,818 | 1,148,107   | 6p25.1   | 6p25.3   |
| LU18_AD | 20 | 5  | 5  | 4,884,036 | 994,099     | 5p15.32  | 5p15.33  |
| LU18_L  | 15 | 5  | 5  | 4,884,130 | 992,986     | 5p15.32  | 5p15.33  |
| LU18_AD | 67 | 5  | 1  | 4,896,130 | 142,839,597 | 5p15.32  | 1q21.1   |
| LU18_AD | 7  | 5  | 1  | 4,896,700 | 143,390,096 | 5p15.32  | 1q21.1   |
| LU18_L  | 78 | 5  | 1  | 4,898,055 | 142,838,272 | 5p15.32  | 1q21.1   |
| LU18_L  | 8  | 5  | 25 | 4,898,529 | 1,701,107   | 5p15.32  | 25       |
| LU18_L  | 9  | 5  | 1  | 4,899,368 | 143,390,092 | 5p15.32  | 1q21.1   |
| LU18_AD | 3  | 9  | 2  | 4,944,438 | 201,928,656 | 9p24.1   | 2q33.1   |
| LU8_L   | 5  | 7  | 7  | 4,952,602 | 5,148,462   | 7p22.1   | 7p22.1   |
| LU16_AD | 9  | 5  | 7  | 4,959,208 | 29,656,928  | 5p15.32  | 7p14.3   |
| LU16_L  | 8  | 5  | 7  | 4,968,824 | 29,651,313  | 5p15.32  | 7p14.3   |
| LU7_L   | 3  | 7  | 7  | 4,989,897 | 25,121,011  | 7p22.1   | 7p15.3   |
| LU18_L  | 6  | 5  | 12 | 4,990,342 | 67,018,029  | 5p15.32  | 12q14.3  |
| LU18_AD | 11 | 5  | 12 | 4,990,573 | 67,017,662  | 5p15.32  | 12q14.3  |
| LU12_AD | 3  | 11 | 11 | 5,016,820 | 5,052,964   | 11p15.4  | 11p15.4  |
| LU12_AD | 3  | 11 | 11 | 5,052,964 | 5,016,820   | 11p15.4  | 11p15.4  |
| LU21_AD | 3  | 18 | 1  | 5,085,905 | 87,271,712  | 18p11.31 | 1p22.3   |
| LU20_L  | 3  | 10 | 11 | 5,094,717 | 42,901,704  | 10p15.1  | 11p12    |
| LU8_L   | 3  | 9  | 1  | 5,096,353 | 238,104,233 | 9p24.1   | 1q43     |
| LU11_AD | 12 | 18 | 18 | 5,096,416 | 1,510,047   | 18p11.31 | 18p11.32 |
| LU20_AD | 3  | 10 | 1  | 5,097,194 | 119,719,571 | 10p15.1  | 1p12     |
| LU4_AD  | 4  | 10 | 13 | 5,097,959 | 27,791,002  | 10p15.1  | 13q12.13 |
| LU16_L  | 10 | 20 | 20 | 5,120,151 | 4,860,399   | 20p12.3  | 20p13    |
| LU16_AD | 14 | 20 | 20 | 5,120,280 | 4,861,984   | 20p12.3  | 20p13    |
| LU18_L  | 3  | 2  | 12 | 5,141,404 | 68,166,171  | 2p25.2   | 12q15    |
| LU8_L   | 5  | 7  | 7  | 5,148,462 | 4,952,602   | 7p22.1   | 7p22.1   |
| LU18_L  | 3  | 19 | 10 | 5,157,487 | 22,433,806  | 19p13.3  | 10p12.31 |
| LU21_L  | 3  | 16 | 16 | 5,164,061 | 847,884     | 16p13.3  | 16p13.3  |
| LU4_AD  | 3  | 19 | 11 | 5,164,137 | 110,267,837 | 19p13.3  | 11q22.3  |
| LU14_AD | 17 | 5  | 1  | 5,171,365 | 145,143,543 | 5p15.32  | 1q21.1   |
| LU14_AD | 20 | 5  | 1  | 5,171,495 | 120,673,427 | 5p15.32  | 1p11.2   |
| LU14_L  | 13 | 5  | 1  | 5,173,032 | 120,672,931 | 5p15.32  | 1p11.2   |
| LU20_AD | 3  | 18 | 18 | 5,180,233 | 5,213,888   | 18p11.31 | 18p11.31 |
| LU11_AD | 3  | 16 | 8  | 5,184,480 | 12,354,388  | 16p13.3  | 8p23.1   |

|         |    |    |    |           |             |          |          |
|---------|----|----|----|-----------|-------------|----------|----------|
| LU12_L  | 22 | 8  | 8  | 5,199,396 | 59,819,840  | 8p23.2   | 8q12.1   |
| LU12_L  | 12 | 8  | 8  | 5,202,803 | 24,661,430  | 8p23.2   | 8p21.2   |
| LU12_L  | 14 | 8  | 8  | 5,202,949 | 20,445,825  | 8p23.2   | 8p21.3   |
| LU11_AD | 28 | 18 | 18 | 5,204,385 | 1,022,900   | 18p11.31 | 18p11.32 |
| LU14_L  | 26 | 5  | 1  | 5,204,523 | 145,087,089 | 5p15.32  | 1q21.1   |
| LU14_AD | 28 | 5  | 1  | 5,205,543 | 145,086,879 | 5p15.32  | 1q21.1   |
| LU12_L  | 26 | 8  | 8  | 5,205,741 | 128,614,772 | 8p23.2   | 8q24.21  |
| LU20_AD | 3  | 18 | 18 | 5,213,888 | 5,180,233   | 18p11.31 | 18p11.31 |
| LU11_AD | 12 | 18 | 18 | 5,217,343 | 5,410,453   | 18p11.31 | 18p11.31 |
| LU6_AD  | 8  | 1  | 1  | 5,244,550 | 4,616,031   | 1p36.32  | 1p36.32  |
| LU6_L   | 3  | 1  | 1  | 5,245,962 | 4,616,166   | 1p36.32  | 1p36.32  |
| LU12_L  | 7  | 17 | 17 | 5,254,565 | 29,613,705  | 17p13.2  | 17q11.2  |
| LU12_L  | 4  | 16 | 4  | 5,259,210 | 4,115,879   | 16p13.3  | 4p16.3   |
| LU3_L   | 3  | 20 | 6  | 5,280,563 | 165,873,195 | 20p12.3  | 6q27     |
| LU11_AD | 7  | 18 | 18 | 5,328,689 | 1,332,773   | 18p11.31 | 18p11.32 |
| LU20_AD | 3  | 5  | 3  | 5,374,711 | 183,960,344 | 5p15.32  | 3q27.1   |
| LU16_AD | 12 | 20 | 20 | 5,393,800 | 9,370,288   | 20p12.3  | 20p12.2  |
| LU16_L  | 12 | 20 | 20 | 5,394,426 | 9,370,912   | 20p12.3  | 20p12.2  |
| LU11_AD | 12 | 18 | 18 | 5,410,453 | 5,217,343   | 18p11.31 | 18p11.31 |
| LU14_L  | 3  | 5  | 5  | 5,428,454 | 5,478,678   | 5p15.32  | 5p15.32  |
| LU14_L  | 3  | 5  | 5  | 5,478,678 | 5,428,454   | 5p15.32  | 5p15.32  |
| LU21_AD | 3  | 16 | 16 | 5,486,888 | 5,517,494   | 16p13.3  | 16p13.3  |
| LU21_AD | 3  | 16 | 16 | 5,517,494 | 5,486,888   | 16p13.3  | 16p13.3  |
| LU3_L   | 3  | 3  | 3  | 5,531,492 | 5,565,365   | 3p26.1   | 3p26.1   |
| LU3_L   | 3  | 3  | 3  | 5,565,365 | 5,531,492   | 3p26.1   | 3p26.1   |
| LU11_AD | 7  | 8  | 2  | 5,580,389 | 171,005,635 | 8p23.2   | 2q31.1   |
| LU18_AD | 6  | 11 | 12 | 5,595,619 | 73,385,458  | 11p15.4  | 12q21.1  |
| LU18_L  | 3  | 11 | 7  | 5,603,699 | 14,916,289  | 11p15.4  | 7p21.2   |
| LU4_L   | 4  | 18 | 18 | 5,656,148 | 4,764,731   | 18p11.31 | 18p11.31 |
| LU14_L  | 4  | 12 | 12 | 5,680,849 | 5,736,073   | 12p13.31 | 12p13.31 |
| LU14_L  | 4  | 12 | 12 | 5,736,073 | 5,680,849   | 12p13.31 | 12p13.31 |
| LU7_L   | 4  | 7  | 12 | 5,748,915 | 58,669,543  | 7p22.1   | 12q14.1  |
| LU4_AD  | 7  | 7  | 7  | 5,751,300 | 3,597,635   | 7p22.1   | 7p22.2   |
| LU3_L   | 3  | 19 | 9  | 5,829,600 | 125,664,613 | 19p13.3  | 9q33.2   |
| LU18_L  | 6  | 11 | 8  | 5,904,722 | 18,131,323  | 11p15.4  | 8p22     |
| LU18_AD | 4  | 11 | 8  | 5,904,804 | 18,130,838  | 11p15.4  | 8p22     |
| LU18_L  | 4  | 11 | 11 | 5,931,877 | 6,901,286   | 11p15.4  | 11p15.4  |
| LU18_AD | 4  | 23 | 24 | 5,948,562 | 16,833,242  | Xp22.32  | Yq11.221 |
| LU7_AD  | 4  | 7  | 7  | 5,949,976 | 8,736,936   | 7p22.1   | 7p21.3   |
| LU6_L   | 4  | 6  | 15 | 5,973,660 | 72,499,003  | 6p25.1   | 15q23    |
| LU18_AD | 7  | 11 | 8  | 5,981,572 | 8,083,933   | 11p15.4  | 8p23.1   |
| LU18_L  | 5  | 18 | 18 | 5,985,644 | 6,019,245   | 18p11.31 | 18p11.31 |
| LU18_L  | 4  | 11 | 11 | 5,989,190 | 6,823,614   | 11p15.4  | 11p15.4  |
| LU18_AD | 10 | 11 | 11 | 5,993,456 | 17,029,836  | 11p15.4  | 11p15.1  |



|         |    |    |    |           |             |          |          |
|---------|----|----|----|-----------|-------------|----------|----------|
| LU18_L  | 5  | 11 | 11 | 5,993,548 | 17,029,895  | 11p15.4  | 11p15.1  |
| LU3_AD  | 5  | 17 | 17 | 5,998,076 | 6,028,495   | 17p13.2  | 17p13.2  |
| LU18_L  | 5  | 18 | 18 | 6,019,245 | 5,985,644   | 18p11.31 | 18p11.31 |
| LU18_AD | 3  | 23 | 24 | 6,028,182 | 16,772,112  | Xp22.31  | Yq11.221 |
| LU3_AD  | 5  | 17 | 17 | 6,028,495 | 5,998,076   | 17p13.2  | 17p13.2  |
| LU18_AD | 5  | 6  | 8  | 6,063,234 | 75,958,368  | 6p25.1   | 8q21.11  |
| LU7_AD  | 4  | 7  | 7  | 6,070,836 | 47,883,554  | 7p22.1   | 7p12.3   |
| LU7_L   | 10 | 7  | 7  | 6,071,948 | 47,882,638  | 7p22.1   | 7p12.3   |
| LU6_AD  | 3  | 11 | 1  | 6,076,676 | 92,821,218  | 11p15.4  | 1p22.1   |
| LU18_AD | 10 | 5  | 8  | 6,089,243 | 25,045,322  | 5p15.32  | 8p21.2   |
| LU18_L  | 11 | 5  | 8  | 6,090,973 | 25,042,581  | 5p15.32  | 8p21.2   |
| LU3_L   | 6  | 6  | 6  | 6,103,782 | 6,136,506   | 6p25.1   | 6p25.1   |
| LU21_L  | 3  | 24 | 24 | 6,114,501 | 6,172,377   | Yp11.2   | Yp11.2   |
| LU3_L   | 6  | 6  | 6  | 6,136,506 | 6,103,782   | 6p25.1   | 6p25.1   |
| LU14_L  | 3  | 20 | 23 | 6,139,092 | 90,320,620  | 20p12.3  | Xq21.31  |
| LU21_L  | 3  | 24 | 24 | 6,172,377 | 6,114,501   | Yp11.2   | Yp11.2   |
| LU18_L  | 6  | 11 | 11 | 6,177,785 | 93,308,177  | 11p15.4  | 11q21    |
| LU18_L  | 3  | 11 | 11 | 6,204,018 | 56,616,886  | 11p15.4  | 11q12.1  |
| LU18_AD | 5  | 11 | 11 | 6,206,175 | 56,617,112  | 11p15.4  | 11q12.1  |
| LU3_AD  | 3  | 6  | 6  | 6,230,647 | 6,263,931   | 6p25.1   | 6p25.1   |
| LU11_AD | 4  | 1  | 1  | 6,252,915 | 95,424,411  | 1p36.31  | 1p21.3   |
| LU3_AD  | 3  | 6  | 6  | 6,263,931 | 6,230,647   | 6p25.1   | 6p25.1   |
| LU16_AD | 4  | 5  | 4  | 6,303,511 | 49,312,439  | 5p15.31  | 4p11     |
| LU16_L  | 8  | 5  | 25 | 6,304,553 | 2,197,262   | 5p15.31  | 25       |
| LU16_L  | 7  | 5  | 4  | 6,305,529 | 49,312,658  | 5p15.31  | 4p11     |
| LU16_AD | 12 | 5  | 25 | 6,305,696 | 2,196,943   | 5p15.31  | 25       |
| LU16_AD | 4  | 5  | 4  | 6,306,149 | 49,515,707  | 5p15.31  | 4p11     |
| LU4_AD  | 5  | 24 | 23 | 6,401,745 | 90,862,132  | Yp11.2   | Xq21.31  |
| LU18_L  | 4  | 3  | 3  | 6,436,630 | 166,223,415 | 3p26.1   | 3q26.1   |
| LU18_AD | 3  | 11 | 11 | 6,482,430 | 9,644,228   | 11p15.4  | 11p15.4  |
| LU21_L  | 3  | 5  | 5  | 6,483,944 | 12,684,683  | 5p15.31  | 5p15.2   |
| LU18_AD | 4  | 11 | 8  | 6,503,288 | 8,167,459   | 11p15.4  | 8p23.1   |
| LU18_L  | 4  | 11 | 8  | 6,504,013 | 8,167,283   | 11p15.4  | 8p23.1   |
| LU18_AD | 4  | 2  | 2  | 6,645,130 | 8,264,921   | 2p25.2   | 2p25.1   |
| LU18_L  | 4  | 11 | 15 | 6,647,180 | 40,660,559  | 11p15.4  | 15q15.1  |
| LU18_L  | 32 | 11 | 21 | 6,740,066 | 21,902,047  | 11p15.4  | 21q21.1  |
| LU18_AD | 29 | 11 | 21 | 6,740,199 | 21,900,579  | 11p15.4  | 21q21.1  |
| LU21_L  | 3  | 17 | 12 | 6,778,881 | 103,058,217 | 17p13.1  | 12q23.2  |
| LU18_AD | 5  | 11 | 11 | 6,789,577 | 15,424,617  | 11p15.4  | 11p15.2  |
| LU18_L  | 3  | 11 | 11 | 6,789,620 | 15,425,773  | 11p15.4  | 11p15.2  |
| LU18_L  | 7  | 11 | 11 | 6,791,450 | 3,245,419   | 11p15.4  | 11p15.4  |
| LU18_AD | 3  | 11 | 11 | 6,792,232 | 3,247,140   | 11p15.4  | 11p15.4  |
| LU18_L  | 6  | 11 | 11 | 6,815,514 | 3,251,286   | 11p15.4  | 11p15.4  |
| LU18_AD | 6  | 11 | 11 | 6,816,121 | 3,249,463   | 11p15.4  | 11p15.4  |

|         |    |    |    |           |             |          |          |
|---------|----|----|----|-----------|-------------|----------|----------|
| LU18_L  | 4  | 11 | 11 | 6,823,614 | 5,989,190   | 11p15.4  | 11p15.4  |
| LU18_AD | 4  | 11 | 11 | 6,824,764 | 18,392,743  | 11p15.4  | 11p15.1  |
| LU7_L   | 13 | 7  | 7  | 6,850,151 | 8,738,295   | 7p22.1   | 7p21.3   |
| LU7_AD  | 4  | 7  | 7  | 6,850,825 | 8,738,101   | 7p22.1   | 7p21.3   |
| LU4_AD  | 5  | 7  | 7  | 6,869,392 | 79,101,113  | 7p22.1   | 7q21.11  |
| LU3_L   | 3  | 7  | 8  | 6,875,283 | 12,542,349  | 7p22.1   | 8p23.1   |
| LU20_L  | 3  | 2  | 2  | 6,901,204 | 6,937,167   | 2p25.2   | 2p25.2   |
| LU18_L  | 4  | 11 | 11 | 6,901,286 | 5,931,877   | 11p15.4  | 11p15.4  |
| LU18_L  | 3  | 5  | 15 | 6,907,994 | 21,188,592  | 5p15.31  | 15q11.2  |
| LU18_AD | 13 | 5  | 12 | 6,936,700 | 72,260,051  | 5p15.31  | 12q21.1  |
| LU20_L  | 3  | 2  | 2  | 6,937,167 | 6,901,204   | 2p25.2   | 2p25.2   |
| LU21_L  | 4  | 8  | 4  | 6,939,920 | 3,883,418   | 8p23.1   | 4p16.3   |
| LU18_L  | 16 | 5  | 12 | 6,939,995 | 72,259,066  | 5p15.31  | 12q21.1  |
| LU16_L  | 8  | 5  | 5  | 6,946,623 | 8,165,643   | 5p15.31  | 5p15.31  |
| LU12_L  | 29 | 8  | 8  | 6,983,610 | 11,408,263  | 8p23.1   | 8p23.1   |
| LU7_L   | 17 | 16 | 1  | 7,036,260 | 185,445,329 | 16p13.3  | 1q25.3   |
| LU7_AD  | 8  | 16 | 1  | 7,042,190 | 185,446,341 | 16p13.3  | 1q25.3   |
| LU3_L   | 5  | 7  | 7  | 7,233,189 | 7,263,382   | 7p22.1   | 7p22.1   |
| LU5_L   | 3  | 5  | 4  | 7,260,207 | 118,174,192 | 5p15.31  | 4q26     |
| LU3_L   | 5  | 7  | 7  | 7,263,382 | 7,233,189   | 7p22.1   | 7p22.1   |
| LU7_L   | 3  | 8  | 8  | 7,265,261 | 128,440,461 | 8p23.1   | 8q24.21  |
| LU18_AD | 5  | 2  | 2  | 7,300,090 | 2,759,179   | 2p25.1   | 2p25.3   |
| LU20_L  | 3  | 3  | 3  | 7,352,044 | 7,396,914   | 3p26.1   | 3p26.1   |
| LU5_AD  | 3  | 8  | 1  | 7,361,164 | 155,601,703 | 8p23.1   | 1q22     |
| LU3_AD  | 5  | 16 | 16 | 7,374,698 | 7,406,761   | 16p13.3  | 16p13.3  |
| LU20_AD | 3  | 2  | 2  | 7,375,219 | 7,409,145   | 2p25.1   | 2p25.1   |
| LU20_L  | 3  | 3  | 3  | 7,396,914 | 7,352,044   | 3p26.1   | 3p26.1   |
| LU3_AD  | 5  | 16 | 16 | 7,406,761 | 7,374,698   | 16p13.3  | 16p13.3  |
| LU20_AD | 3  | 2  | 2  | 7,409,145 | 7,375,219   | 2p25.1   | 2p25.1   |
| LU20_AD | 3  | 9  | 18 | 7,426,519 | 51,533,876  | 9p24.1   | 18q21.2  |
| LU12_AD | 3  | 18 | 18 | 7,496,513 | 7,527,525   | 18p11.23 | 18p11.23 |
| LU21_L  | 5  | 5  | 5  | 7,500,750 | 12,624,103  | 5p15.31  | 5p15.2   |
| LU12_AD | 3  | 18 | 18 | 7,527,525 | 7,496,513   | 18p11.23 | 18p11.23 |
| LU3_L   | 5  | 16 | 16 | 7,530,453 | 7,567,217   | 16p13.3  | 16p13.3  |
| LU3_L   | 5  | 16 | 16 | 7,567,217 | 7,530,453   | 16p13.3  | 16p13.3  |
| LU4_L   | 5  | 7  | 7  | 7,723,478 | 7,757,641   | 7p21.3   | 7p21.3   |
| LU4_AD  | 13 | 7  | 7  | 7,750,242 | 3,647,248   | 7p21.3   | 7p22.2   |
| LU4_AD  | 9  | 7  | 7  | 7,755,924 | 3,087,878   | 7p21.3   | 7p22.2   |
| LU4_L   | 5  | 7  | 7  | 7,757,641 | 7,723,478   | 7p21.3   | 7p21.3   |
| LU15_AD | 6  | 9  | 9  | 7,842,218 | 14,435,872  | 9p24.1   | 9p22.3   |
| LU7_L   | 3  | 6  | 7  | 7,986,993 | 159,024,244 | 6p24.3   | 7q36.3   |
| LU14_AD | 3  | 8  | 8  | 7,989,769 | 12,340,714  | 8p23.1   | 8p23.1   |
| LU12_AD | 3  | 8  | 4  | 8,027,757 | 104,478,374 | 8p23.1   | 4q24     |
| LU21_AD | 3  | 24 | 24 | 8,033,514 | 24,888,365  | Yp11.2   | Yq11.223 |

|         |    |    |    |           |             |          |          |
|---------|----|----|----|-----------|-------------|----------|----------|
| LU18_AD | 7  | 8  | 11 | 8,083,933 | 5,981,572   | 8p23.1   | 11p15.4  |
| LU7_AD  | 6  | 7  | 12 | 8,085,885 | 68,273,056  | 7p21.3   | 12q15    |
| LU7_L   | 9  | 7  | 12 | 8,086,508 | 68,272,077  | 7p21.3   | 12q15    |
| LU16_L  | 8  | 5  | 5  | 8,165,643 | 6,946,623   | 5p15.31  | 5p15.31  |
| LU18_L  | 4  | 8  | 11 | 8,167,283 | 6,504,013   | 8p23.1   | 11p15.4  |
| LU18_AD | 4  | 8  | 11 | 8,167,459 | 6,503,288   | 8p23.1   | 11p15.4  |
| LU6_AD  | 3  | 5  | 5  | 8,216,720 | 8,585,487   | 5p15.31  | 5p15.31  |
| LU16_AD | 3  | 23 | 7  | 8,254,909 | 37,174,966  | Xp22.31  | 7p14.2   |
| LU18_AD | 4  | 2  | 2  | 8,264,921 | 6,645,130   | 2p25.1   | 2p25.2   |
| LU20_AD | 3  | 18 | 18 | 8,364,852 | 8,425,966   | 18p11.23 | 18p11.23 |
| LU16_AD | 16 | 9  | 9  | 8,373,985 | 41,942,156  | 9p24.1   | 9p12     |
| LU16_AD | 27 | 9  | 9  | 8,383,159 | 44,414,232  | 9p24.1   | 9p11.2   |
| LU20_AD | 3  | 18 | 18 | 8,425,966 | 8,364,852   | 18p11.23 | 18p11.23 |
| LU15_AD | 3  | 24 | 24 | 8,433,398 | 9,586,882   | Yp11.2   | Yp11.2   |
| LU12_L  | 6  | 8  | 8  | 8,555,678 | 22,907,082  | 8p23.1   | 8p21.3   |
| LU4_AD  | 3  | 12 | 4  | 8,559,786 | 3,883,047   | 12p13.31 | 4p16.3   |
| LU6_AD  | 3  | 5  | 5  | 8,585,487 | 8,216,720   | 5p15.31  | 5p15.31  |
| LU21_L  | 5  | 7  | 7  | 8,603,214 | 8,641,296   | 7p21.3   | 7p21.3   |
| LU12_L  | 3  | 16 | 16 | 8,625,638 | 8,689,357   | 16p13.2  | 16p13.2  |
| LU21_L  | 5  | 7  | 7  | 8,641,296 | 8,603,214   | 7p21.3   | 7p21.3   |
| LU5_L   | 3  | 24 | 1  | 8,673,824 | 186,888,903 | Yp11.2   | 1q31.1   |
| LU12_L  | 3  | 16 | 16 | 8,689,357 | 8,625,638   | 16p13.2  | 16p13.2  |
| LU6_L   | 3  | 3  | 4  | 8,716,344 | 9,760,694   | 3p25.3   | 4p16.1   |
| LU4_L   | 4  | 3  | 4  | 8,716,432 | 4,134,397   | 3p25.3   | 4p16.3   |
| LU18_L  | 3  | 3  | 4  | 8,728,437 | 4,130,246   | 3p25.3   | 4p16.3   |
| LU7_AD  | 4  | 7  | 7  | 8,736,936 | 5,949,976   | 7p21.3   | 7p22.1   |
| LU7_AD  | 4  | 7  | 7  | 8,738,101 | 6,850,825   | 7p21.3   | 7p22.1   |
| LU7_L   | 13 | 7  | 7  | 8,738,295 | 6,850,151   | 7p21.3   | 7p22.1   |
| LU21_AD | 3  | 3  | 12 | 8,739,278 | 79,872,963  | 3p25.3   | 12q21.2  |
| LU12_L  | 3  | 3  | 11 | 8,742,055 | 89,673,387  | 3p25.3   | 11q14.3  |
| LU16_AD | 30 | 20 | 7  | 8,850,324 | 18,700,228  | 20p12.3  | 7p21.1   |
| LU16_L  | 22 | 20 | 7  | 8,850,708 | 18,700,769  | 20p12.3  | 7p21.1   |
| LU18_AD | 3  | 11 | 7  | 8,908,117 | 21,489,717  | 11p15.4  | 7p15.3   |
| LU20_AD | 3  | 12 | 3  | 8,918,716 | 150,574,870 | 12p13.31 | 3q25.1   |
| LU4_AD  | 3  | 12 | 24 | 8,940,290 | 25,231,357  | 12p13.31 | Yq11.223 |
| LU12_L  | 36 | 8  | 8  | 8,946,105 | 41,635,000  | 8p23.1   | 8p11.21  |
| LU3_L   | 3  | 6  | 6  | 8,964,297 | 8,995,282   | 6p24.3   | 6p24.3   |
| LU18_AD | 12 | 11 | 7  | 8,974,736 | 23,016,559  | 11p15.4  | 7p15.3   |
| LU4_L   | 3  | 7  | 7  | 8,979,883 | 9,012,560   | 7p21.3   | 7p21.3   |
| LU18_L  | 3  | 16 | 5  | 8,993,936 | 107,062,651 | 16p13.2  | 5q21.3   |
| LU3_L   | 3  | 6  | 6  | 8,995,282 | 8,964,297   | 6p24.3   | 6p24.3   |
| LU7_AD  | 5  | 7  | 7  | 8,996,322 | 16,050,681  | 7p21.3   | 7p21.2   |
| LU7_L   | 12 | 7  | 7  | 8,997,765 | 16,050,448  | 7p21.3   | 7p21.2   |
| LU4_L   | 3  | 7  | 7  | 9,012,560 | 8,979,883   | 7p21.3   | 7p21.3   |

|         |    |    |    |           |             |          |          |
|---------|----|----|----|-----------|-------------|----------|----------|
| LU6_L   | 5  | 20 | 10 | 9,020,551 | 9,590,391   | 20p12.3  | 10p14    |
| LU4_AD  | 4  | 3  | 3  | 9,026,189 | 9,055,731   | 3p25.3   | 3p25.3   |
| LU21_AD | 3  | 2  | 5  | 9,039,237 | 42,111,362  | 2p25.1   | 5p13.1   |
| LU4_AD  | 4  | 3  | 3  | 9,055,731 | 9,026,189   | 3p25.3   | 3p25.3   |
| LU18_AD | 3  | 4  | 4  | 9,101,248 | 4,167,116   | 4p16.1   | 4p16.3   |
| LU18_AD | 3  | 1  | 7  | 9,151,422 | 129,956,778 | 1p36.23  | 7q32.2   |
| LU15_L  | 3  | 24 | 24 | 9,153,922 | 24,557,763  | Yp11.2   | Yq11.223 |
| LU21_L  | 3  | 24 | 24 | 9,155,346 | 9,865,233   | Yp11.2   | Yp11.2   |
| LU18_AD | 5  | 11 | 8  | 9,245,692 | 13,279,322  | 11p15.4  | 8p22     |
| LU18_L  | 3  | 11 | 8  | 9,246,344 | 13,279,511  | 11p15.4  | 8p22     |
| LU12_L  | 18 | 8  | 8  | 9,280,005 | 19,699,420  | 8p23.1   | 8p21.3   |
| LU12_L  | 9  | 8  | 8  | 9,282,956 | 38,841,279  | 8p23.1   | 8p11.22  |
| LU18_AD | 5  | 6  | 4  | 9,288,305 | 190,538,109 | 6p24.3   | 4q35.2   |
| LU3_AD  | 17 | 1  | 1  | 9,319,332 | 9,399,555   | 1p36.22  | 1p36.22  |
| LU3_L   | 24 | 1  | 1  | 9,319,728 | 9,398,859   | 1p36.22  | 1p36.22  |
| LU14_AD | 14 | 5  | 1  | 9,320,976 | 120,893,079 | 5p15.31  | 1p11.2   |
| LU14_L  | 5  | 5  | 1  | 9,321,852 | 120,892,978 | 5p15.31  | 1p11.2   |
| LU4_AD  | 5  | 3  | 23 | 9,370,196 | 136,297,640 | 3p25.3   | Xq26.3   |
| LU16_AD | 12 | 20 | 20 | 9,370,288 | 5,393,800   | 20p12.2  | 20p12.3  |
| LU16_L  | 12 | 20 | 20 | 9,370,912 | 5,394,426   | 20p12.2  | 20p12.3  |
| LU6_L   | 3  | 24 | 24 | 9,393,088 | 9,740,176   | Yp11.2   | Yp11.2   |
| LU3_L   | 24 | 1  | 1  | 9,398,859 | 9,319,728   | 1p36.22  | 1p36.22  |
| LU3_AD  | 17 | 1  | 1  | 9,399,555 | 9,319,332   | 1p36.22  | 1p36.22  |
| LU3_L   | 3  | 24 | 24 | 9,404,581 | 9,732,402   | Yp11.2   | Yp11.2   |
| LU6_AD  | 4  | 1  | 1  | 9,438,179 | 13,351,642  | 1p36.22  | 1p36.21  |
| LU16_L  | 3  | 4  | 7  | 9,455,426 | 97,582,299  | 4p16.1   | 7q21.3   |
| LU5_L   | 3  | 12 | 12 | 9,472,134 | 11,651,388  | 12p13.31 | 12p13.2  |
| LU21_AD | 3  | 21 | 15 | 9,479,778 | 20,100,707  | 21p11.2  | 15q11.1  |
| LU14_L  | 3  | 23 | 23 | 9,502,302 | 9,537,182   | Xp22.2   | Xp22.2   |
| LU6_AD  | 14 | 20 | 8  | 9,511,629 | 137,373,527 | 20p12.2  | 8q24.23  |
| LU11_AD | 3  | 4  | 9  | 9,512,034 | 93,517,987  | 4p16.1   | 9q22.2   |
| LU6_L   | 12 | 20 | 8  | 9,513,117 | 137,374,676 | 20p12.2  | 8q24.23  |
| LU18_L  | 8  | 7  | 12 | 9,529,254 | 76,608,296  | 7p21.3   | 12q21.2  |
| LU18_AD | 13 | 7  | 12 | 9,529,537 | 76,606,823  | 7p21.3   | 12q21.2  |
| LU16_L  | 4  | 3  | 7  | 9,534,211 | 127,901,325 | 3p25.3   | 7q32.1   |
| LU14_L  | 3  | 23 | 23 | 9,537,182 | 9,502,302   | Xp22.2   | Xp22.2   |
| LU15_AD | 3  | 24 | 24 | 9,586,882 | 8,433,398   | Yp11.2   | Yp11.2   |
| LU6_L   | 5  | 10 | 20 | 9,590,391 | 9,020,551   | 10p14    | 20p12.3  |
| LU18_AD | 3  | 11 | 11 | 9,644,228 | 6,482,430   | 11p15.4  | 11p15.4  |
| LU7_AD  | 3  | 4  | 11 | 9,647,158 | 67,608,174  | 4p16.1   | 11q13.2  |
| LU8_L   | 3  | 4  | 1  | 9,664,702 | 166,578,717 | 4p16.1   | 1q24.1   |
| LU5_L   | 5  | 12 | 7  | 9,719,610 | 149,729,870 | 12p13.31 | 7q36.1   |
| LU3_L   | 3  | 24 | 24 | 9,732,402 | 9,404,581   | Yp11.2   | Yp11.2   |
| LU6_L   | 3  | 24 | 24 | 9,740,176 | 9,393,088   | Yp11.2   | Yp11.2   |

|         |    |    |    |            |             |          |          |
|---------|----|----|----|------------|-------------|----------|----------|
| LU11_AD | 3  | 19 | 4  | 9,750,067  | 137,533,940 | 19p13.2  | 4q28.3   |
| LU8_L   | 3  | 4  | 2  | 9,752,045  | 71,238,738  | 4p16.1   | 2p13.3   |
| LU6_L   | 3  | 4  | 3  | 9,760,694  | 8,716,344   | 4p16.1   | 3p25.3   |
| LU6_L   | 3  | 6  | 6  | 9,792,597  | 9,826,161   | 6p24.3   | 6p24.3   |
| LU3_L   | 4  | 19 | 15 | 9,823,125  | 89,772,149  | 19p13.2  | 15q26.1  |
| LU4_AD  | 3  | 19 | 5  | 9,824,058  | 86,806,724  | 19p13.2  | 5q14.3   |
| LU5_L   | 3  | 19 | 12 | 9,825,325  | 52,127,596  | 19p13.2  | 12q13.13 |
| LU6_L   | 3  | 6  | 6  | 9,826,161  | 9,792,597   | 6p24.3   | 6p24.3   |
| LU16_AD | 18 | 21 | 14 | 9,827,915  | 48,235,362  | 21p11.2  | 14q21.3  |
| LU18_L  | 4  | 21 | 5  | 9,829,462  | 2,640,271   | 21p11.2  | 5p15.33  |
| LU20_AD | 4  | 19 | 3  | 9,837,654  | 79,826,839  | 19p13.2  | 3p12.2   |
| LU3_L   | 3  | 21 | 4  | 9,864,184  | 130,055,821 | 21p11.2  | 4q28.2   |
| LU21_L  | 3  | 24 | 24 | 9,865,233  | 9,155,346   | Yp11.2   | Yp11.2   |
| LU18_AD | 11 | 7  | 11 | 9,892,357  | 18,059,629  | 7p21.3   | 11p15.1  |
| LU18_L  | 17 | 7  | 11 | 9,895,413  | 18,059,435  | 7p21.3   | 11p15.1  |
| LU12_AD | 6  | 21 | 15 | 9,915,740  | 98,619,945  | 21p11.2  | 15q26.3  |
| LU18_L  | 6  | 7  | 11 | 10,035,910 | 29,821,503  | 7p21.3   | 11p14.1  |
| LU18_L  | 3  | 2  | 1  | 10,070,063 | 89,693,029  | 2p25.1   | 1p22.2   |
| LU12_AD | 3  | 16 | 16 | 10,085,182 | 10,135,686  | 16p13.2  | 16p13.2  |
| LU12_L  | 5  | 21 | 16 | 10,096,033 | 47,916,652  | 21p11.2  | 16q12.1  |
| LU12_AD | 3  | 16 | 16 | 10,135,686 | 10,085,182  | 16p13.2  | 16p13.2  |
| LU15_AD | 3  | 16 | 16 | 10,135,829 | 10,173,130  | 16p13.2  | 16p13.2  |
| LU20_AD | 4  | 21 | 2  | 10,137,939 | 34,142,498  | 21p11.2  | 2p22.3   |
| LU21_L  | 4  | 21 | 12 | 10,140,630 | 105,701,821 | 21p11.2  | 12q23.3  |
| LU18_AD | 3  | 21 | 4  | 10,144,358 | 102,824,039 | 21p11.2  | 4q24     |
| LU15_AD | 3  | 16 | 16 | 10,173,130 | 10,135,829  | 16p13.2  | 16p13.2  |
| LU3_L   | 5  | 18 | 5  | 10,216,442 | 114,373,650 | 18p11.22 | 5q22.3   |
| LU18_AD | 5  | 5  | 8  | 10,278,518 | 17,605,438  | 5p15.2   | 8p22     |
| LU18_L  | 6  | 5  | 8  | 10,278,568 | 17,605,255  | 5p15.2   | 8p22     |
| LU5_AD  | 4  | 10 | 1  | 10,331,587 | 48,905,454  | 10p14    | 1p33     |
| LU3_AD  | 3  | 20 | 20 | 10,344,711 | 10,387,342  | 20p12.2  | 20p12.2  |
| LU3_AD  | 3  | 20 | 20 | 10,387,342 | 10,344,711  | 20p12.2  | 20p12.2  |
| LU18_L  | 3  | 7  | 7  | 10,409,039 | 10,452,525  | 7p21.3   | 7p21.3   |
| LU12_L  | 3  | 8  | 3  | 10,430,650 | 125,585,319 | 8p23.1   | 3q21.2   |
| LU21_L  | 5  | 16 | 9  | 10,440,186 | 12,775,612  | 16p13.2  | 9p23     |
| LU18_L  | 3  | 7  | 7  | 10,452,525 | 10,409,039  | 7p21.3   | 7p21.3   |
| LU5_AD  | 3  | 3  | 3  | 10,455,709 | 10,512,820  | 3p25.3   | 3p25.3   |
| LU5_AD  | 3  | 3  | 3  | 10,512,820 | 10,455,709  | 3p25.3   | 3p25.3   |
| LU11_AD | 3  | 12 | 6  | 10,518,836 | 161,212,810 | 12p13.2  | 6q26     |
| LU16_L  | 3  | 11 | 3  | 10,529,558 | 96,336,024  | 11p15.4  | 3q11.2   |
| LU18_AD | 5  | 11 | 11 | 10,546,017 | 17,903,031  | 11p15.4  | 11p15.1  |
| LU18_L  | 12 | 11 | 11 | 10,548,340 | 17,902,846  | 11p15.4  | 11p15.1  |
| LU18_AD | 6  | 7  | 12 | 10,603,140 | 75,447,147  | 7p21.3   | 12q21.1  |
| LU18_L  | 6  | 7  | 5  | 10,603,810 | 16,195,920  | 7p21.3   | 5p15.1   |

|         |    |    |    |            |             |          |          |
|---------|----|----|----|------------|-------------|----------|----------|
| LU18_AD | 13 | 7  | 5  | 10,603,812 | 16,195,717  | 7p21.3   | 5p15.1   |
| LU18_L  | 5  | 7  | 5  | 10,636,875 | 15,408,669  | 7p21.3   | 5p15.1   |
| LU18_AD | 10 | 7  | 5  | 10,639,389 | 15,408,844  | 7p21.3   | 5p15.1   |
| LU4_AD  | 4  | 5  | 11 | 10,650,362 | 48,989,828  | 5p15.2   | 11p11.12 |
| LU18_AD | 4  | 7  | 11 | 10,662,845 | 22,928,093  | 7p21.3   | 11p14.3  |
| LU3_L   | 3  | 8  | 8  | 10,723,303 | 10,755,550  | 8p23.1   | 8p23.1   |
| LU3_L   | 3  | 8  | 8  | 10,755,550 | 10,723,303  | 8p23.1   | 8p23.1   |
| LU18_AD | 3  | 7  | 11 | 10,760,059 | 22,895,112  | 7p21.3   | 11p14.3  |
| LU18_AD | 3  | 7  | 5  | 10,762,046 | 21,666,747  | 7p21.3   | 5p14.3   |
| LU18_L  | 3  | 16 | 8  | 10,793,686 | 12,565,296  | 16p13.13 | 8p23.1   |
| LU20_L  | 3  | 16 | 16 | 10,796,671 | 18,577,547  | 16p13.13 | 16p12.3  |
| LU8_L   | 3  | 20 | 20 | 10,804,275 | 10,833,871  | 20p12.2  | 20p12.2  |
| LU8_L   | 3  | 20 | 20 | 10,833,871 | 10,804,275  | 20p12.2  | 20p12.2  |
| LU4_AD  | 7  | 7  | 23 | 10,978,318 | 86,037,384  | 7p21.3   | Xq21.2   |
| LU18_AD | 14 | 5  | 12 | 11,009,899 | 67,414,820  | 5p15.2   | 12q14.3  |
| LU4_AD  | 5  | 20 | 20 | 11,063,665 | 11,094,007  | 20p12.2  | 20p12.2  |
| LU4_AD  | 5  | 20 | 20 | 11,094,007 | 11,063,665  | 20p12.2  | 20p12.2  |
| LU18_AD | 10 | 5  | 25 | 11,160,180 | 1,651,866   | 5p15.2   | 25       |
| LU18_L  | 8  | 5  | 25 | 11,160,930 | 1,651,821   | 5p15.2   | 25       |
| LU21_AD | 9  | 17 | 17 | 11,163,177 | 20,844,856  | 17p12    | 17p11.2  |
| LU21_L  | 5  | 17 | 17 | 11,163,405 | 20,844,656  | 17p12    | 17p11.2  |
| LU18_AD | 4  | 5  | 15 | 11,163,531 | 21,157,170  | 5p15.2   | 15q11.2  |
| LU18_L  | 6  | 5  | 15 | 11,164,093 | 21,157,784  | 5p15.2   | 15q11.2  |
| LU16_AD | 34 | 7  | 5  | 11,220,305 | 716,442     | 7p21.3   | 5p15.33  |
| LU16_AD | 5  | 7  | 5  | 11,220,508 | 801,515     | 7p21.3   | 5p15.33  |
| LU16_L  | 15 | 7  | 5  | 11,221,089 | 716,988     | 7p21.3   | 5p15.33  |
| LU21_L  | 11 | 5  | 5  | 11,239,452 | 50,920,653  | 5p15.2   | 5q11.2   |
| LU16_AD | 60 | 7  | 5  | 11,335,694 | 1,732,585   | 7p21.3   | 5p15.33  |
| LU16_L  | 9  | 7  | 5  | 11,338,142 | 1,732,844   | 7p21.3   | 5p15.33  |
| LU12_L  | 7  | 8  | 3  | 11,407,532 | 75,585,360  | 8p23.1   | 3p12.3   |
| LU12_L  | 29 | 8  | 8  | 11,408,263 | 6,983,610   | 8p23.1   | 8p23.1   |
| LU21_L  | 3  | 18 | 20 | 11,442,744 | 34,447,733  | 18p11.21 | 20q11.23 |
| LU21_L  | 6  | 18 | 20 | 11,457,327 | 36,019,402  | 18p11.21 | 20q11.23 |
| LU5_L   | 4  | 7  | 7  | 11,465,437 | 11,497,759  | 7p21.3   | 7p21.3   |
| LU21_L  | 3  | 11 | 11 | 11,477,680 | 11,508,086  | 11p15.3  | 11p15.3  |
| LU5_L   | 4  | 7  | 7  | 11,497,759 | 11,465,437  | 7p21.3   | 7p21.3   |
| LU21_L  | 3  | 11 | 11 | 11,508,086 | 11,477,680  | 11p15.3  | 11p15.3  |
| LU5_L   | 3  | 12 | 12 | 11,651,388 | 9,472,134   | 12p13.2  | 12p13.31 |
| LU11_AD | 6  | 4  | 4  | 11,682,470 | 33,978,685  | 4p15.33  | 4p15.1   |
| LU3_AD  | 4  | 19 | 19 | 11,716,386 | 52,710,695  | 19p13.2  | 19q13.41 |
| LU16_AD | 3  | 6  | 6  | 11,717,521 | 11,759,540  | 6p24.1   | 6p24.1   |
| LU4_AD  | 3  | 10 | 15 | 11,725,971 | 43,347,705  | 10p14    | 15q15.2  |
| LU16_AD | 3  | 6  | 6  | 11,759,540 | 11,717,521  | 6p24.1   | 6p24.1   |
| LU12_AD | 3  | 8  | 1  | 11,775,157 | 247,284,392 | 8p23.1   | 1q44     |

|         |    |    |    |            |             |          |          |
|---------|----|----|----|------------|-------------|----------|----------|
| LU11_AD | 8  | 16 | 16 | 11,779,500 | 49,942,212  | 16p13.13 | 16q12.1  |
| LU18_L  | 3  | 8  | 13 | 11,782,530 | 68,480,528  | 8p23.1   | 13q21.32 |
| LU14_L  | 3  | 6  | 6  | 11,845,029 | 11,892,885  | 6p24.1   | 6p24.1   |
| LU11_AD | 3  | 8  | 11 | 11,866,809 | 3,596,434   | 8p23.1   | 11p15.4  |
| LU14_L  | 3  | 6  | 6  | 11,892,885 | 11,845,029  | 6p24.1   | 6p24.1   |
| LU16_AD | 3  | 8  | 3  | 11,990,438 | 129,829,343 | 8p23.1   | 3q22.1   |
| LU11_AD | 3  | 8  | 8  | 11,990,454 | 12,049,547  | 8p23.1   | 8p23.1   |
| LU18_L  | 6  | 19 | 6  | 11,991,153 | 85,677,918  | 19p13.2  | 6q14.3   |
| LU11_AD | 3  | 8  | 8  | 12,049,547 | 11,990,454  | 8p23.1   | 8p23.1   |
| LU20_AD | 3  | 3  | 3  | 12,065,208 | 12,104,080  | 3p25.2   | 3p25.2   |
| LU5_AD  | 23 | 7  | 7  | 12,085,260 | 12,128,987  | 7p21.3   | 7p21.3   |
| LU5_L   | 21 | 7  | 7  | 12,085,860 | 12,128,586  | 7p21.3   | 7p21.3   |
| LU20_AD | 3  | 3  | 3  | 12,104,080 | 12,065,208  | 3p25.2   | 3p25.2   |
| LU5_L   | 21 | 7  | 7  | 12,128,586 | 12,085,860  | 7p21.3   | 7p21.3   |
| LU5_AD  | 23 | 7  | 7  | 12,128,987 | 12,085,260  | 7p21.3   | 7p21.3   |
| LU3_AD  | 3  | 20 | 20 | 12,153,666 | 12,186,168  | 20p12.1  | 20p12.1  |
| LU3_AD  | 3  | 20 | 20 | 12,186,168 | 12,153,666  | 20p12.1  | 20p12.1  |
| LU16_AD | 17 | 9  | 7  | 12,202,921 | 34,546,308  | 9p23     | 7p14.3   |
| LU16_AD | 5  | 9  | 9  | 12,289,989 | 46,709,995  | 9p23     | 9p11.2   |
| LU3_AD  | 3  | 17 | 17 | 12,315,413 | 12,349,101  | 17p12    | 17p12    |
| LU14_AD | 3  | 8  | 8  | 12,340,714 | 7,989,769   | 8p23.1   | 8p23.1   |
| LU12_L  | 13 | 8  | 8  | 12,346,884 | 17,177,858  | 8p23.1   | 8p22     |
| LU3_AD  | 3  | 17 | 17 | 12,349,101 | 12,315,413  | 17p12    | 17p12    |
| LU11_AD | 3  | 8  | 16 | 12,354,388 | 5,184,480   | 8p23.1   | 16p13.3  |
| LU12_L  | 3  | 4  | 1  | 12,428,673 | 91,669,445  | 4p15.33  | 1p22.2   |
| LU12_AD | 10 | 1  | 20 | 12,473,414 | 35,628,396  | 1p36.22  | 20q11.23 |
| LU18_L  | 3  | 8  | 25 | 12,510,836 | 2,008,235   | 8p23.1   | 25       |
| LU3_L   | 3  | 8  | 7  | 12,542,349 | 6,875,283   | 8p23.1   | 7p22.1   |
| LU18_L  | 3  | 8  | 16 | 12,565,296 | 10,793,686  | 8p23.1   | 16p13.13 |
| LU4_AD  | 10 | 7  | 7  | 12,565,500 | 35,675,781  | 7p21.3   | 7p14.2   |
| LU5_AD  | 5  | 8  | 1  | 12,574,674 | 247,285,957 | 8p23.1   | 1q44     |
| LU12_L  | 21 | 8  | 8  | 12,595,431 | 40,284,330  | 8p23.1   | 8p11.21  |
| LU16_AD | 6  | 7  | 7  | 12,595,657 | 17,599,985  | 7p21.3   | 7p21.1   |
| LU16_AD | 6  | 7  | 7  | 12,601,371 | 12,697,814  | 7p21.3   | 7p21.3   |
| LU4_AD  | 4  | 7  | 23 | 12,609,099 | 3,052,483   | 7p21.3   | Xp22.33  |
| LU21_L  | 5  | 5  | 5  | 12,624,103 | 7,500,750   | 5p15.2   | 5p15.31  |
| LU21_L  | 7  | 5  | 5  | 12,626,319 | 13,992,512  | 5p15.2   | 5p15.2   |
| LU14_AD | 3  | 7  | 10 | 12,629,328 | 73,714,512  | 7p21.3   | 10q22.1  |
| LU4_AD  | 4  | 11 | 4  | 12,635,201 | 174,699,234 | 11p15.3  | 4q34.1   |
| LU18_AD | 3  | 6  | 8  | 12,668,476 | 146,184,261 | 6p24.1   | 8q24.3   |
| LU21_L  | 5  | 5  | 5  | 12,675,224 | 51,798,360  | 5p15.2   | 5q11.2   |
| LU21_L  | 3  | 5  | 5  | 12,684,683 | 6,483,944   | 5p15.2   | 5p15.31  |
| LU7_L   | 3  | 7  | 7  | 12,695,033 | 19,255,399  | 7p21.3   | 7p21.1   |
| LU7_AD  | 4  | 7  | 7  | 12,697,185 | 19,253,594  | 7p21.3   | 7p21.1   |

|         |    |    |    |            |             |          |          |
|---------|----|----|----|------------|-------------|----------|----------|
| LU16_AD | 6  | 7  | 7  | 12,697,814 | 12,601,371  | 7p21.3   | 7p21.3   |
| LU7_L   | 3  | 7  | 12 | 12,703,867 | 20,330,254  | 7p21.3   | 12p12.2  |
| LU8_L   | 3  | 2  | 2  | 12,714,849 | 16,973,419  | 2p24.3   | 2p24.2   |
| LU3_L   | 3  | 2  | 2  | 12,719,096 | 16,973,902  | 2p24.3   | 2p24.2   |
| LU3_AD  | 5  | 11 | 11 | 12,753,801 | 12,792,022  | 11p15.2  | 11p15.2  |
| LU21_L  | 5  | 9  | 16 | 12,775,612 | 10,440,186  | 9p23     | 16p13.2  |
| LU3_AD  | 5  | 11 | 11 | 12,792,022 | 12,753,801  | 11p15.2  | 11p15.2  |
| LU4_AD  | 3  | 1  | 1  | 12,840,988 | 160,668,310 | 1p36.21  | 1q23.3   |
| LU21_AD | 3  | 5  | 5  | 13,001,563 | 13,034,318  | 5p15.2   | 5p15.2   |
| LU21_AD | 3  | 5  | 5  | 13,034,318 | 13,001,563  | 5p15.2   | 5p15.2   |
| LU18_AD | 3  | 4  | 4  | 13,116,109 | 13,164,355  | 4p15.33  | 4p15.33  |
| LU18_AD | 3  | 4  | 4  | 13,164,355 | 13,116,109  | 4p15.33  | 4p15.33  |
| LU4_L   | 3  | 23 | 23 | 13,266,951 | 13,296,783  | Xp22.2   | Xp22.2   |
| LU18_L  | 4  | 24 | 9  | 13,269,870 | 43,140,344  | Yq11.1   | 9p12     |
| LU18_AD | 5  | 8  | 11 | 13,279,322 | 9,245,692   | 8p22     | 11p15.4  |
| LU18_L  | 3  | 8  | 11 | 13,279,511 | 9,246,344   | 8p22     | 11p15.4  |
| LU3_L   | 4  | 24 | 9  | 13,282,103 | 83,465,388  | Yq11.1   | 9q21.31  |
| LU4_L   | 3  | 23 | 23 | 13,296,783 | 13,266,951  | Xp22.2   | Xp22.2   |
| LU18_AD | 4  | 8  | 11 | 13,302,529 | 16,990,970  | 8p22     | 11p15.1  |
| LU20_L  | 3  | 24 | 9  | 13,324,091 | 67,926,726  | Yq11.1   | 9q13     |
| LU3_L   | 3  | 24 | 2  | 13,340,635 | 132,833,612 | Yq11.1   | 2q21.2   |
| LU6_AD  | 4  | 1  | 1  | 13,351,642 | 9,438,179   | 1p36.21  | 1p36.22  |
| LU4_AD  | 4  | 7  | 7  | 13,373,808 | 13,406,896  | 7p21.3   | 7p21.3   |
| LU4_AD  | 4  | 7  | 7  | 13,406,896 | 13,373,808  | 7p21.3   | 7p21.3   |
| LU18_AD | 4  | 5  | 5  | 13,406,969 | 18,245,128  | 5p15.2   | 5p15.1   |
| LU18_L  | 4  | 12 | 5  | 13,417,373 | 18,536,665  | 12p13.1  | 5p14.3   |
| LU20_L  | 3  | 1  | 13 | 13,433,187 | 51,733,452  | 1p36.21  | 13q14.3  |
| LU20_L  | 3  | 11 | 12 | 13,441,045 | 53,144,619  | 11p15.2  | 12q13.13 |
| LU16_AD | 39 | 7  | 5  | 13,493,241 | 1,727,588   | 7p21.3   | 5p15.33  |
| LU18_L  | 4  | 11 | 12 | 13,494,896 | 70,533,010  | 11p15.2  | 12q15    |
| LU16_L  | 7  | 7  | 5  | 13,498,507 | 1,723,953   | 7p21.3   | 5p15.33  |
| LU20_L  | 3  | 18 | 18 | 13,530,465 | 13,560,800  | 18p11.21 | 18p11.21 |
| LU20_L  | 3  | 18 | 18 | 13,560,800 | 13,530,465  | 18p11.21 | 18p11.21 |
| LU18_L  | 4  | 5  | 25 | 13,561,071 | 2,320,702   | 5p15.2   | 25       |
| LU16_AD | 3  | 6  | 6  | 13,600,357 | 16,950,271  | 6p23     | 6p22.3   |
| LU14_L  | 4  | 24 | 17 | 13,637,183 | 25,289,604  | Yq11.21  | 17q11.1  |
| LU18_L  | 3  | 4  | 4  | 13,708,486 | 13,739,887  | 4p15.33  | 4p15.33  |
| LU18_L  | 3  | 4  | 4  | 13,739,887 | 13,708,486  | 4p15.33  | 4p15.33  |
| LU16_AD | 8  | 18 | 15 | 13,797,657 | 37,281,951  | 18p11.21 | 15q14    |
| LU21_L  | 11 | 5  | 5  | 13,801,629 | 7,517,666   | 5p15.2   | 5p15.31  |
| LU3_L   | 3  | 20 | 23 | 13,932,591 | 124,700,471 | 20p12.1  | Xq25     |
| LU21_L  | 7  | 5  | 5  | 13,992,512 | 12,626,319  | 5p15.2   | 5p15.2   |
| LU21_L  | 7  | 5  | 5  | 13,997,705 | 51,736,688  | 5p15.2   | 5q11.2   |
| LU4_AD  | 6  | 7  | 7  | 14,067,271 | 33,705,262  | 7p21.2   | 7p14.3   |



|         |    |    |    |            |             |          |          |
|---------|----|----|----|------------|-------------|----------|----------|
| LU12_L  | 13 | 8  | 8  | 14,083,327 | 17,776,652  | 8p22     | 8p22     |
| LU16_AD | 5  | 17 | 5  | 14,084,482 | 96,094,682  | 17p12    | 5q15     |
| LU8_L   | 4  | 18 | 4  | 14,123,187 | 127,335     | 18p11.21 | 4p16.3   |
| LU6_L   | 5  | 20 | 20 | 14,127,812 | 17,095,287  | 20p12.1  | 20p12.1  |
| LU18_L  | 4  | 17 | 17 | 14,140,026 | 20,482,628  | 17p12    | 17p11.2  |
| LU20_AD | 3  | 7  | 7  | 14,149,467 | 14,179,535  | 7p21.2   | 7p21.2   |
| LU21_L  | 3  | 18 | 16 | 14,173,303 | 33,515,639  | 18p11.21 | 16p11.2  |
| LU20_AD | 3  | 7  | 7  | 14,179,535 | 14,149,467  | 7p21.2   | 7p21.2   |
| LU3_AD  | 3  | 3  | 3  | 14,237,988 | 14,269,913  | 3p25.1   | 3p25.1   |
| LU3_AD  | 3  | 3  | 3  | 14,269,913 | 14,237,988  | 3p25.1   | 3p25.1   |
| LU18_L  | 3  | 8  | 14 | 14,306,559 | 19,392,906  | 8p22     | 14q11.2  |
| LU18_AD | 3  | 18 | 8  | 14,380,030 | 73,932,898  | 18p11.21 | 8q21.11  |
| LU3_L   | 5  | 6  | 12 | 14,387,555 | 3,746,597   | 6p23     | 12p13.32 |
| LU15_AD | 6  | 9  | 9  | 14,435,872 | 7,842,218   | 9p22.3   | 9p24.1   |
| LU20_L  | 3  | 18 | 21 | 14,476,084 | 18,939,570  | 18p11.21 | 21q21.1  |
| LU3_L   | 4  | 4  | 4  | 14,512,737 | 14,548,850  | 4p15.33  | 4p15.33  |
| LU3_L   | 4  | 1  | 1  | 14,516,230 | 14,568,193  | 1p36.21  | 1p36.21  |
| LU3_L   | 4  | 4  | 4  | 14,548,850 | 14,512,737  | 4p15.33  | 4p15.33  |
| LU3_L   | 4  | 1  | 1  | 14,568,193 | 14,516,230  | 1p36.21  | 1p36.21  |
| LU6_L   | 6  | 9  | 2  | 14,605,064 | 165,976,047 | 9p22.3   | 2q24.3   |
| LU12_L  | 17 | 8  | 8  | 14,618,879 | 18,162,549  | 8p22     | 8p22     |
| LU12_L  | 5  | 12 | 11 | 14,637,444 | 55,813,653  | 12p13.1  | 11q12.1  |
| LU18_L  | 5  | 5  | 12 | 14,769,991 | 70,363,345  | 5p15.2   | 12q15    |
| LU18_AD | 3  | 5  | 12 | 14,770,255 | 70,363,125  | 5p15.2   | 12q15    |
| LU7_L   | 5  | 7  | 7  | 14,794,434 | 15,021,103  | 7p21.2   | 7p21.2   |
| LU3_L   | 4  | 21 | 14 | 14,816,008 | 20,637,233  | 21q11.2  | 14q11.2  |
| LU18_AD | 5  | 11 | 22 | 14,822,455 | 22,306,854  | 11p15.2  | 22q11.22 |
| LU18_L  | 5  | 7  | 11 | 14,913,978 | 30,750,995  | 7p21.2   | 11p14.1  |
| LU18_L  | 3  | 7  | 11 | 14,916,289 | 5,603,699   | 7p21.2   | 11p15.4  |
| LU18_AD | 3  | 16 | 5  | 14,919,622 | 98,529,711  | 16p13.11 | 5q21.1   |
| LU7_L   | 3  | 9  | 8  | 14,966,969 | 108,585,374 | 9p22.3   | 8q23.1   |
| LU20_L  | 4  | 2  | 2  | 14,975,395 | 15,017,027  | 2p24.3   | 2p24.3   |
| LU3_AD  | 3  | 4  | 4  | 14,978,206 | 15,007,789  | 4p15.33  | 4p15.33  |
| LU18_L  | 3  | 21 | 14 | 14,995,327 | 19,568,071  | 21q11.2  | 14q11.2  |
| LU20_L  | 3  | 16 | 16 | 15,002,783 | 70,044,595  | 16p13.11 | 16q22.1  |
| LU16_AD | 34 | 20 | 20 | 15,002,856 | 14,893,627  | 20p12.1  | 20p12.1  |
| LU16_L  | 23 | 20 | 20 | 15,003,097 | 14,893,724  | 20p12.1  | 20p12.1  |
| LU8_L   | 3  | 16 | 16 | 15,007,620 | 70,045,083  | 16p13.11 | 16q22.1  |
| LU3_AD  | 3  | 4  | 4  | 15,007,789 | 14,978,206  | 4p15.33  | 4p15.33  |
| LU20_L  | 4  | 2  | 2  | 15,017,027 | 14,975,395  | 2p24.3   | 2p24.3   |
| LU12_L  | 34 | 8  | 8  | 15,018,600 | 39,582,797  | 8p22     | 8p11.22  |
| LU7_L   | 5  | 7  | 7  | 15,021,103 | 14,794,434  | 7p21.2   | 7p21.2   |
| LU4_AD  | 3  | 1  | 1  | 15,105,360 | 15,144,150  | 1p36.21  | 1p36.21  |
| LU4_AD  | 3  | 1  | 1  | 15,144,150 | 15,105,360  | 1p36.21  | 1p36.21  |

|         |    |    |    |            |             |          |          |
|---------|----|----|----|------------|-------------|----------|----------|
| LU16_AD | 3  | 18 | 10 | 15,198,597 | 38,892,850  | 18p11.21 | 10p11.1  |
| LU7_L   | 3  | 19 | 12 | 15,250,316 | 65,661,516  | 19p13.12 | 12q14.3  |
| LU6_L   | 6  | 16 | 5  | 15,272,833 | 18,895,614  | 16p13.11 | 5p14.3   |
| LU6_L   | 4  | 16 | 2  | 15,274,376 | 27,934,825  | 16p13.11 | 2p23.2   |
| LU6_L   | 3  | 16 | 2  | 15,283,405 | 25,840,735  | 16p13.11 | 2p23.3   |
| LU8_AD  | 5  | 17 | 17 | 15,329,706 | 15,361,639  | 17p12    | 17p12    |
| LU8_AD  | 5  | 17 | 17 | 15,361,639 | 15,329,706  | 17p12    | 17p12    |
| LU18_L  | 5  | 5  | 7  | 15,408,669 | 10,636,875  | 5p15.1   | 7p21.3   |
| LU18_AD | 10 | 5  | 7  | 15,408,844 | 10,639,389  | 5p15.1   | 7p21.3   |
| LU18_AD | 8  | 5  | 7  | 15,423,489 | 21,498,170  | 5p15.1   | 7p15.3   |
| LU18_AD | 5  | 11 | 11 | 15,424,617 | 6,789,577   | 11p15.2  | 11p15.4  |
| LU18_L  | 3  | 11 | 11 | 15,425,773 | 6,789,620   | 11p15.2  | 11p15.4  |
| LU8_L   | 3  | 21 | 10 | 15,429,244 | 42,726,484  | 21q11.2  | 10q11.21 |
| LU18_AD | 5  | 5  | 8  | 15,538,639 | 25,933,239  | 5p15.1   | 8p21.2   |
| LU12_AD | 3  | 17 | 5  | 15,687,689 | 55,265,407  | 17p12    | 5q11.2   |
| LU16_AD | 32 | 7  | 7  | 15,749,119 | 46,079,970  | 7p21.2   | 7p12.3   |
| LU16_AD | 5  | 7  | 5  | 15,749,341 | 1,797,157   | 7p21.2   | 5p15.33  |
| LU16_L  | 6  | 7  | 7  | 15,749,588 | 46,079,925  | 7p21.2   | 7p12.3   |
| LU7_AD  | 3  | 19 | 19 | 15,760,600 | 16,102,917  | 19p13.12 | 19p13.12 |
| LU16_AD | 75 | 7  | 5  | 15,770,672 | 3,022,173   | 7p21.2   | 5p15.33  |
| LU16_L  | 13 | 7  | 5  | 15,770,932 | 3,022,637   | 7p21.2   | 5p15.33  |
| LU5_AD  | 3  | 20 | 20 | 15,789,297 | 15,823,395  | 20p12.1  | 20p12.1  |
| LU5_AD  | 3  | 20 | 20 | 15,823,395 | 15,789,297  | 20p12.1  | 20p12.1  |
| LU18_AD | 4  | 5  | 15 | 15,824,709 | 21,143,433  | 5p15.1   | 15q11.2  |
| LU18_L  | 3  | 11 | 11 | 15,888,078 | 15,918,747  | 11p15.2  | 11p15.2  |
| LU18_L  | 3  | 11 | 11 | 15,918,747 | 15,888,078  | 11p15.2  | 11p15.2  |
| LU3_L   | 3  | 5  | 5  | 15,939,916 | 15,973,500  | 5p15.1   | 5p15.1   |
| LU18_L  | 4  | 20 | 1  | 15,960,954 | 171,571,646 | 20p12.1  | 1q24.3   |
| LU3_L   | 3  | 5  | 5  | 15,973,500 | 15,939,916  | 5p15.1   | 5p15.1   |
| LU21_L  | 3  | 19 | 19 | 15,986,752 | 16,053,828  | 19p13.12 | 19p13.12 |
| LU16_AD | 3  | 9  | 9  | 15,999,498 | 41,942,816  | 9p22.3   | 9p12     |
| LU3_L   | 4  | 24 | 1  | 16,004,217 | 175,068,466 | Yq11.221 | 1q25.1   |
| LU21_L  | 3  | 24 | 10 | 16,008,622 | 37,564,937  | Yq11.221 | 10p11.21 |
| LU7_L   | 4  | 7  | 7  | 16,045,939 | 2,602,033   | 7p21.2   | 7p22.3   |
| LU7_L   | 12 | 7  | 7  | 16,050,448 | 8,997,765   | 7p21.2   | 7p21.3   |
| LU7_AD  | 5  | 7  | 7  | 16,050,681 | 8,996,322   | 7p21.2   | 7p21.3   |
| LU21_L  | 3  | 19 | 19 | 16,053,828 | 15,986,752  | 19p13.12 | 19p13.12 |
| LU7_AD  | 3  | 19 | 19 | 16,102,917 | 15,760,600  | 19p13.12 | 19p13.12 |
| LU3_L   | 3  | 20 | 20 | 16,109,313 | 16,142,282  | 20p12.1  | 20p12.1  |
| LU21_L  | 3  | 11 | 11 | 16,112,573 | 16,144,338  | 11p15.2  | 11p15.2  |
| LU21_L  | 3  | 21 | 16 | 16,127,660 | 57,499,816  | 21q11.2  | 16q21    |
| LU3_L   | 3  | 20 | 20 | 16,142,282 | 16,109,313  | 20p12.1  | 20p12.1  |
| LU21_L  | 3  | 11 | 11 | 16,144,338 | 16,112,573  | 11p15.2  | 11p15.2  |
| LU18_L  | 5  | 5  | 5  | 16,148,849 | 34,104,209  | 5p15.1   | 5p13.2   |

|         |    |    |    |            |             |          |         |
|---------|----|----|----|------------|-------------|----------|---------|
| LU18_AD | 20 | 5  | 12 | 16,155,208 | 70,367,670  | 5p15.1   | 12q15   |
| LU18_L  | 19 | 5  | 12 | 16,155,324 | 70,367,310  | 5p15.1   | 12q15   |
| LU18_L  | 13 | 5  | 8  | 16,169,472 | 3,952,442   | 5p15.1   | 8p23.2  |
| LU18_AD | 17 | 5  | 8  | 16,169,668 | 3,952,589   | 5p15.1   | 8p23.2  |
| LU12_L  | 19 | 8  | 8  | 16,190,529 | 17,118,698  | 8p22     | 8p22    |
| LU18_AD | 13 | 5  | 7  | 16,195,717 | 10,603,812  | 5p15.1   | 7p21.3  |
| LU18_L  | 6  | 5  | 7  | 16,195,920 | 10,603,810  | 5p15.1   | 7p21.3  |
| LU18_L  | 3  | 22 | 13 | 16,204,700 | 19,171,368  | 22q11.1  | 13q11   |
| LU3_L   | 5  | 9  | 9  | 16,211,476 | 16,243,246  | 9p22.3   | 9p22.3  |
| LU18_L  | 41 | 5  | 5  | 16,226,889 | 20,778,032  | 5p15.1   | 5p14.3  |
| LU18_AD | 31 | 5  | 5  | 16,226,898 | 20,778,524  | 5p15.1   | 5p14.3  |
| LU3_L   | 5  | 9  | 9  | 16,243,246 | 16,211,476  | 9p22.3   | 9p22.3  |
| LU16_L  | 4  | 21 | 9  | 16,250,584 | 33,051,774  | 21q11.2  | 9p21.1  |
| LU18_AD | 5  | 7  | 11 | 16,264,386 | 16,995,607  | 7p21.2   | 11p15.1 |
| LU21_AD | 4  | 24 | 8  | 16,273,074 | 87,941,013  | Yq11.221 | 8q21.3  |
| LU3_L   | 4  | 22 | 14 | 16,287,533 | 19,986,715  | 22q11.1  | 14q11.2 |
| LU3_AD  | 5  | 22 | 14 | 16,289,218 | 19,985,022  | 22q11.1  | 14q11.2 |
| LU6_L   | 6  | 16 | 2  | 16,307,037 | 28,594,188  | 16p13.11 | 2p23.2  |
| LU18_L  | 32 | 5  | 11 | 16,373,825 | 19,636,698  | 5p15.1   | 11p15.1 |
| LU18_AD | 31 | 5  | 11 | 16,375,429 | 19,634,856  | 5p15.1   | 11p15.1 |
| LU18_L  | 3  | 3  | 3  | 16,392,887 | 16,454,059  | 3p24.3   | 3p24.3  |
| LU18_L  | 29 | 7  | 21 | 16,398,586 | 24,881,835  | 7p21.2   | 21q21.2 |
| LU18_AD | 22 | 7  | 21 | 16,399,306 | 24,881,272  | 7p21.2   | 21q21.2 |
| LU11_AD | 10 | 6  | 6  | 16,425,134 | 52,963,528  | 6p22.3   | 6p12.1  |
| LU20_AD | 4  | 1  | 5  | 16,430,454 | 34,783,039  | 1p36.13  | 5p13.2  |
| LU12_AD | 3  | 1  | 10 | 16,432,667 | 132,091,204 | 1p36.13  | 10q26.3 |
| LU4_AD  | 4  | 1  | 8  | 16,432,800 | 49,877,071  | 1p36.13  | 8q11.21 |
| LU18_L  | 3  | 3  | 3  | 16,454,059 | 16,392,887  | 3p24.3   | 3p24.3  |
| LU18_AD | 14 | 5  | 11 | 16,468,643 | 29,696,076  | 5p15.1   | 11p14.1 |
| LU18_L  | 17 | 5  | 11 | 16,469,266 | 29,695,938  | 5p15.1   | 11p14.1 |
| LU8_AD  | 3  | 5  | 5  | 16,496,842 | 16,529,445  | 5p15.1   | 5p15.1  |
| LU21_L  | 5  | 3  | 3  | 16,506,525 | 16,537,992  | 3p24.3   | 3p24.3  |
| LU16_AD | 4  | 7  | 5  | 16,516,173 | 1,738,863   | 7p21.1   | 5p15.33 |
| LU18_AD | 4  | 7  | 11 | 16,519,573 | 4,530,546   | 7p21.1   | 11p15.4 |
| LU18_L  | 4  | 7  | 11 | 16,520,255 | 4,531,374   | 7p21.1   | 11p15.4 |
| LU8_AD  | 3  | 5  | 5  | 16,529,445 | 16,496,842  | 5p15.1   | 5p15.1  |
| LU21_L  | 5  | 3  | 3  | 16,537,992 | 16,506,525  | 3p24.3   | 3p24.3  |
| LU11_AD | 9  | 1  | 1  | 16,555,228 | 29,125,897  | 1p36.13  | 1p35.3  |
| LU11_AD | 10 | 1  | 1  | 16,571,538 | 110,092,118 | 1p36.13  | 1p13.3  |
| LU11_L  | 7  | 1  | 1  | 16,571,575 | 110,091,892 | 1p36.13  | 1p13.3  |
| LU12_L  | 7  | 8  | 8  | 16,638,349 | 42,575,552  | 8p22     | 8p11.21 |
| LU12_L  | 3  | 8  | 8  | 16,642,943 | 41,425,711  | 8p22     | 8p11.21 |
| LU16_AD | 8  | 7  | 7  | 16,648,775 | 34,495,874  | 7p21.1   | 7p14.3  |
| LU12_L  | 8  | 8  | 8  | 16,685,419 | 16,894,703  | 8p22     | 8p22    |

|         |    |    |    |            |             |          |          |
|---------|----|----|----|------------|-------------|----------|----------|
| LU18_L  | 3  | 7  | 8  | 16,760,641 | 19,547,896  | 7p21.1   | 8p21.3   |
| LU18_AD | 8  | 7  | 8  | 16,760,771 | 19,545,925  | 7p21.1   | 8p21.3   |
| LU18_AD | 3  | 24 | 23 | 16,772,112 | 6,028,182   | Yq11.221 | Xp22.31  |
| LU15_L  | 6  | 17 | 17 | 16,783,939 | 16,826,894  | 17p11.2  | 17p11.2  |
| LU7_AD  | 4  | 17 | 25 | 16,791,096 | 263,130     | 17p11.2  | 25       |
| LU18_L  | 20 | 11 | 12 | 16,814,006 | 70,369,535  | 11p15.1  | 12q15    |
| LU18_AD | 23 | 11 | 12 | 16,815,364 | 70,369,492  | 11p15.1  | 12q15    |
| LU15_L  | 6  | 17 | 17 | 16,826,894 | 16,783,939  | 17p11.2  | 17p11.2  |
| LU12_L  | 4  | 1  | 1  | 16,830,283 | 147,852,382 | 1p36.13  | 1q21.2   |
| LU18_AD | 4  | 24 | 23 | 16,833,242 | 5,948,562   | Yq11.221 | Xp22.32  |
| LU18_AD | 9  | 11 | 12 | 16,846,954 | 70,761,545  | 11p15.1  | 12q15    |
| LU18_L  | 4  | 11 | 12 | 16,848,079 | 70,762,591  | 11p15.1  | 12q15    |
| LU4_L   | 3  | 22 | 2  | 16,876,725 | 132,566,667 | 22q11.1  | 2q21.2   |
| LU18_L  | 19 | 7  | 12 | 16,894,626 | 71,818,470  | 7p21.1   | 12q21.1  |
| LU12_L  | 8  | 8  | 8  | 16,894,703 | 16,685,419  | 8p22     | 8p22     |
| LU18_AD | 17 | 7  | 12 | 16,895,238 | 71,818,734  | 7p21.1   | 12q21.1  |
| LU16_L  | 3  | 7  | 12 | 16,919,058 | 86,373,487  | 7p21.1   | 12q21.31 |
| LU6_L   | 10 | 20 | 22 | 16,923,567 | 34,916,813  | 20p12.1  | 22q12.3  |
| LU3_L   | 10 | 1  | 1  | 16,923,987 | 16,966,927  | 1p36.13  | 1p36.13  |
| LU6_AD  | 4  | 20 | 22 | 16,925,574 | 34,915,045  | 20p12.1  | 22q12.3  |
| LU3_L   | 3  | 1  | 3  | 16,925,906 | 49,728,243  | 1p36.13  | 3p21.31  |
| LU16_AD | 3  | 6  | 6  | 16,950,271 | 13,600,357  | 6p22.3   | 6p23     |
| LU3_L   | 10 | 1  | 1  | 16,966,927 | 16,923,987  | 1p36.13  | 1p36.13  |
| LU8_L   | 3  | 2  | 2  | 16,973,419 | 12,714,849  | 2p24.2   | 2p24.3   |
| LU3_L   | 3  | 2  | 2  | 16,973,902 | 12,719,096  | 2p24.2   | 2p24.3   |
| LU18_AD | 4  | 11 | 8  | 16,990,970 | 13,302,529  | 11p15.1  | 8p22     |
| LU18_AD | 5  | 11 | 7  | 16,995,607 | 16,264,386  | 11p15.1  | 7p21.2   |
| LU18_AD | 10 | 11 | 11 | 17,029,836 | 5,993,456   | 11p15.1  | 11p15.4  |
| LU18_L  | 5  | 11 | 11 | 17,029,895 | 5,993,548   | 11p15.1  | 11p15.4  |
| LU11_AD | 7  | 1  | 1  | 17,050,568 | 109,819,374 | 1p36.13  | 1p13.3   |
| LU11_L  | 5  | 1  | 1  | 17,051,882 | 109,818,885 | 1p36.13  | 1p13.3   |
| LU4_AD  | 4  | 10 | 12 | 17,059,985 | 92,780,843  | 10p13    | 12q22    |
| LU12_L  | 3  | 1  | 1  | 17,063,582 | 143,717,107 | 1p36.13  | 1q21.1   |
| LU6_L   | 5  | 20 | 20 | 17,095,287 | 14,127,812  | 20p12.1  | 20p12.1  |
| LU12_L  | 19 | 8  | 8  | 17,118,698 | 16,190,529  | 8p22     | 8p22     |
| LU16_AD | 6  | 7  | 7  | 17,173,370 | 18,308,254  | 7p21.1   | 7p21.1   |
| LU12_L  | 13 | 8  | 8  | 17,177,858 | 12,346,884  | 8p22     | 8p23.1   |
| LU3_AD  | 4  | 16 | 16 | 17,207,204 | 17,246,992  | 16p12.3  | 16p12.3  |
| LU18_L  | 4  | 22 | 20 | 17,228,958 | 25,782,943  | 22q11.1  | 20p11.1  |
| LU3_AD  | 3  | 22 | 20 | 17,230,042 | 25,783,843  | 22q11.1  | 20p11.1  |
| LU3_AD  | 4  | 16 | 16 | 17,246,992 | 17,207,204  | 16p12.3  | 16p12.3  |
| LU15_AD | 14 | 20 | 20 | 17,254,862 | 17,295,727  | 20p12.1  | 20p12.1  |
| LU15_L  | 29 | 20 | 20 | 17,255,086 | 17,293,798  | 20p12.1  | 20p12.1  |
| LU15_L  | 29 | 20 | 20 | 17,293,798 | 17,255,086  | 20p12.1  | 20p12.1  |

|         |    |    |    |            |             |         |         |
|---------|----|----|----|------------|-------------|---------|---------|
| LU15_AD | 14 | 20 | 20 | 17,295,727 | 17,254,862  | 20p12.1 | 20p12.1 |
| LU7_L   | 5  | 7  | 7  | 17,316,728 | 19,181,921  | 7p21.1  | 7p21.1  |
| LU11_AD | 3  | 23 | 16 | 17,327,816 | 26,476,981  | Xp22.13 | 16p12.1 |
| LU11_L  | 6  | 20 | 12 | 17,434,826 | 68,097,323  | 20p12.1 | 12q15   |
| LU4_AD  | 3  | 12 | 17 | 17,449,943 | 50,675,452  | 12p12.3 | 17q22   |
| LU7_L   | 3  | 3  | 3  | 17,519,162 | 17,576,515  | 3p24.3  | 3p24.3  |
| LU21_L  | 4  | 2  | 6  | 17,525,019 | 144,439,461 | 2p24.2  | 6q24.2  |
| LU7_L   | 3  | 3  | 3  | 17,576,515 | 17,519,162  | 3p24.3  | 3p24.3  |
| LU16_AD | 6  | 7  | 7  | 17,599,985 | 12,595,657  | 7p21.1  | 7p21.3  |
| LU7_L   | 3  | 6  | 6  | 17,600,615 | 32,520,438  | 6p22.3  | 6p21.32 |
| LU5_L   | 3  | 6  | 6  | 17,601,249 | 32,520,917  | 6p22.3  | 6p21.32 |
| LU18_L  | 6  | 8  | 5  | 17,605,255 | 10,278,568  | 8p22    | 5p15.2  |
| LU18_AD | 5  | 8  | 5  | 17,605,438 | 10,278,518  | 8p22    | 5p15.2  |
| LU16_AD | 22 | 9  | 9  | 17,614,314 | 44,423,046  | 9p22.2  | 9p11.2  |
| LU16_AD | 45 | 9  | 9  | 17,630,619 | 8,306,208   | 9p22.2  | 9p24.1  |
| LU16_AD | 11 | 9  | 9  | 17,657,227 | 17,810,532  | 9p22.2  | 9p22.2  |
| LU18_L  | 31 | 5  | 11 | 17,661,424 | 21,031,615  | 5p15.1  | 11p15.1 |
| LU18_L  | 14 | 5  | 11 | 17,661,678 | 21,029,451  | 5p15.1  | 11p15.1 |
| LU18_AD | 51 | 5  | 11 | 17,662,440 | 21,028,139  | 5p15.1  | 11p15.1 |
| LU12_L  | 9  | 8  | 8  | 17,663,169 | 19,914,918  | 8p22    | 8p21.3  |
| LU18_AD | 8  | 5  | 5  | 17,705,214 | 97,033,313  | 5p15.1  | 5q15    |
| LU18_L  | 6  | 5  | 5  | 17,706,155 | 97,033,966  | 5p15.1  | 5q15    |
| LU3_AD  | 15 | 12 | 12 | 17,709,902 | 75,614,678  | 12p12.3 | 12q21.1 |
| LU12_L  | 13 | 8  | 8  | 17,776,652 | 14,083,327  | 8p22    | 8p22    |
| LU16_AD | 3  | 3  | 3  | 17,813,035 | 34,565,177  | 3p24.3  | 3p22.3  |
| LU21_L  | 3  | 16 | 16 | 17,828,203 | 17,998,782  | 16p12.3 | 16p12.3 |
| LU18_L  | 12 | 11 | 11 | 17,902,846 | 10,548,340  | 11p15.1 | 11p15.4 |
| LU18_AD | 5  | 11 | 11 | 17,903,031 | 10,546,017  | 11p15.1 | 11p15.4 |
| LU18_AD | 34 | 11 | 7  | 17,973,223 | 21,613,756  | 11p15.1 | 7p15.3  |
| LU18_L  | 27 | 11 | 7  | 17,973,476 | 21,617,551  | 11p15.1 | 7p15.3  |
| LU18_L  | 8  | 11 | 15 | 17,975,285 | 47,257,266  | 11p15.1 | 15q21.1 |
| LU18_AD | 5  | 11 | 15 | 17,975,967 | 47,256,998  | 11p15.1 | 15q21.1 |
| LU20_L  | 4  | 3  | 3  | 17,985,590 | 18,021,595  | 3p24.3  | 3p24.3  |
| LU21_L  | 3  | 16 | 16 | 17,998,782 | 17,828,203  | 16p12.3 | 16p12.3 |
| LU20_L  | 4  | 3  | 3  | 18,021,595 | 17,985,590  | 3p24.3  | 3p24.3  |
| LU18_L  | 17 | 11 | 7  | 18,059,435 | 9,895,413   | 11p15.1 | 7p21.3  |
| LU18_AD | 11 | 11 | 7  | 18,059,629 | 9,892,357   | 11p15.1 | 7p21.3  |
| LU12_AD | 3  | 5  | 5  | 18,085,649 | 18,115,502  | 5p15.1  | 5p15.1  |
| LU4_AD  | 3  | 7  | 7  | 18,103,074 | 21,619,589  | 7p21.1  | 7p15.3  |
| LU12_AD | 3  | 5  | 5  | 18,115,502 | 18,085,649  | 5p15.1  | 5p15.1  |
| LU18_AD | 4  | 8  | 11 | 18,130,838 | 5,904,804   | 8p22    | 11p15.4 |
| LU18_L  | 6  | 8  | 11 | 18,131,323 | 5,904,722   | 8p22    | 11p15.4 |
| LU12_L  | 17 | 8  | 8  | 18,162,549 | 14,618,879  | 8p22    | 8p22    |
| LU18_AD | 10 | 5  | 5  | 18,192,263 | 22,169,062  | 5p15.1  | 5p14.3  |

|         |    |    |    |            |             |          |          |
|---------|----|----|----|------------|-------------|----------|----------|
| LU4_AD  | 3  | 11 | 8  | 18,231,629 | 81,507,140  | 11p15.1  | 8q21.13  |
| LU18_AD | 4  | 5  | 5  | 18,245,128 | 13,406,969  | 5p15.1   | 5p15.2   |
| LU18_L  | 3  | 11 | 11 | 18,279,452 | 18,422,356  | 11p15.1  | 11p15.1  |
| LU20_L  | 3  | 5  | 5  | 18,294,702 | 18,325,663  | 5p15.1   | 5p15.1   |
| LU4_AD  | 3  | 17 | 17 | 18,294,988 | 26,002,777  | 17p11.2  | 17q11.2  |
| LU16_AD | 6  | 7  | 7  | 18,308,254 | 17,173,370  | 7p21.1   | 7p21.1   |
| LU20_L  | 3  | 5  | 5  | 18,325,663 | 18,294,702  | 5p15.1   | 5p15.1   |
| LU5_AD  | 3  | 7  | 7  | 18,344,895 | 18,377,976  | 7p21.1   | 7p21.1   |
| LU5_AD  | 3  | 7  | 7  | 18,377,976 | 18,344,895  | 7p21.1   | 7p21.1   |
| LU18_AD | 4  | 11 | 11 | 18,392,743 | 6,824,764   | 11p15.1  | 11p15.4  |
| LU18_L  | 3  | 11 | 11 | 18,422,356 | 18,279,452  | 11p15.1  | 11p15.1  |
| LU18_L  | 4  | 5  | 12 | 18,536,665 | 13,417,373  | 5p14.3   | 12p13.1  |
| LU18_L  | 4  | 5  | 12 | 18,541,650 | 68,164,343  | 5p14.3   | 12q15    |
| LU21_AD | 3  | 4  | 4  | 18,545,079 | 18,574,751  | 4p15.31  | 4p15.31  |
| LU18_AD | 3  | 5  | 5  | 18,550,025 | 31,186,301  | 5p14.3   | 5p13.3   |
| LU12_L  | 3  | 7  | 7  | 18,555,157 | 18,591,321  | 7p21.1   | 7p21.1   |
| LU3_AD  | 3  | 21 | 21 | 18,555,178 | 18,587,633  | 21q21.1  | 21q21.1  |
| LU21_AD | 3  | 4  | 4  | 18,574,751 | 18,545,079  | 4p15.31  | 4p15.31  |
| LU20_L  | 3  | 16 | 16 | 18,577,547 | 10,796,671  | 16p12.3  | 16p13.13 |
| LU20_AD | 3  | 16 | 5  | 18,577,690 | 135,140,174 | 16p12.3  | 5q31.1   |
| LU3_AD  | 5  | 12 | 12 | 18,583,646 | 72,421,885  | 12p12.3  | 12q21.1  |
| LU6_L   | 6  | 16 | 2  | 18,584,722 | 22,785,941  | 16p12.3  | 2p24.1   |
| LU3_AD  | 3  | 21 | 21 | 18,587,633 | 18,555,178  | 21q21.1  | 21q21.1  |
| LU12_L  | 3  | 7  | 7  | 18,591,321 | 18,555,157  | 7p21.1   | 7p21.1   |
| LU6_L   | 3  | 16 | 2  | 18,595,863 | 30,238,645  | 16p12.3  | 2p23.1   |
| LU20_L  | 3  | 2  | 2  | 18,631,835 | 18,664,773  | 2p24.2   | 2p24.2   |
| LU20_L  | 3  | 2  | 2  | 18,664,773 | 18,631,835  | 2p24.2   | 2p24.2   |
| LU18_AD | 3  | 3  | 3  | 18,696,792 | 18,755,365  | 3p24.3   | 3p24.3   |
| LU18_AD | 3  | 3  | 3  | 18,755,365 | 18,696,792  | 3p24.3   | 3p24.3   |
| LU16_L  | 3  | 22 | 22 | 18,813,496 | 20,503,731  | 22q11.21 | 22q11.21 |
| LU18_AD | 4  | 22 | 22 | 18,813,663 | 20,503,822  | 22q11.21 | 22q11.21 |
| LU20_L  | 3  | 3  | 3  | 18,850,752 | 18,880,290  | 3p24.3   | 3p24.3   |
| LU12_L  | 4  | 22 | 10 | 18,878,228 | 94,936,131  | 22q11.21 | 10q23.33 |
| LU20_L  | 3  | 3  | 3  | 18,880,290 | 18,850,752  | 3p24.3   | 3p24.3   |
| LU12_L  | 11 | 8  | 8  | 18,892,143 | 40,639,526  | 8p22     | 8p11.21  |
| LU12_L  | 11 | 8  | 8  | 18,895,081 | 42,571,235  | 8p22     | 8p11.21  |
| LU6_L   | 6  | 5  | 16 | 18,895,614 | 15,272,833  | 5p14.3   | 16p13.11 |
| LU18_L  | 55 | 1  | 6  | 18,904,760 | 72,624,998  | 1p36.13  | 6q13     |
| LU18_AD | 32 | 1  | 6  | 18,906,460 | 72,623,274  | 1p36.13  | 6q13     |
| LU3_L   | 3  | 22 | 5  | 18,928,204 | 156,095,888 | 22q11.21 | 5q33.3   |
| LU20_L  | 3  | 21 | 18 | 18,939,570 | 14,476,084  | 21q21.1  | 18p11.21 |
| LU20_AD | 3  | 7  | 7  | 18,973,601 | 19,005,657  | 7p21.1   | 7p21.1   |
| LU11_L  | 4  | 8  | 8  | 18,986,672 | 140,480,647 | 8p22     | 8q24.3   |
| LU12_L  | 3  | 11 | 5  | 19,003,185 | 127,559,207 | 11p15.1  | 5q23.3   |

|         |    |    |    |            |             |          |          |
|---------|----|----|----|------------|-------------|----------|----------|
| LU18_L  | 5  | 11 | 12 | 19,003,784 | 69,591,135  | 11p15.1  | 12q15    |
| LU20_AD | 3  | 7  | 7  | 19,005,657 | 18,973,601  | 7p21.1   | 7p21.1   |
| LU4_AD  | 3  | 8  | 23 | 19,017,786 | 76,759,203  | 8p21.3   | Xq21.1   |
| LU6_AD  | 4  | 11 | 1  | 19,055,859 | 92,755,794  | 11p15.1  | 1p22.1   |
| LU4_AD  | 10 | 7  | 7  | 19,151,766 | 40,620,297  | 7p21.1   | 7p14.1   |
| LU18_L  | 3  | 13 | 14 | 19,168,435 | 19,638,758  | 13q11    | 14q11.2  |
| LU18_L  | 3  | 13 | 22 | 19,171,368 | 16,204,700  | 13q11    | 22q11.1  |
| LU7_L   | 4  | 7  | 7  | 19,177,972 | 139,988,552 | 7p21.1   | 7q34     |
| LU7_L   | 5  | 7  | 7  | 19,181,921 | 17,316,728  | 7p21.1   | 7p21.1   |
| LU16_AD | 74 | 7  | 5  | 19,206,396 | 3,027,779   | 7p21.1   | 5p15.33  |
| LU16_L  | 18 | 7  | 5  | 19,206,398 | 3,026,617   | 7p21.1   | 5p15.33  |
| LU7_AD  | 4  | 7  | 7  | 19,253,594 | 12,697,185  | 7p21.1   | 7p21.3   |
| LU8_L   | 4  | 13 | 4  | 19,255,364 | 137,276,507 | 13q11    | 4q28.3   |
| LU7_L   | 3  | 7  | 7  | 19,255,399 | 12,695,033  | 7p21.1   | 7p21.3   |
| LU6_L   | 5  | 16 | 16 | 19,272,618 | 19,574,392  | 16p12.3  | 16p12.3  |
| LU14_L  | 4  | 6  | 6  | 19,274,995 | 87,389,051  | 6p22.3   | 6q14.3   |
| LU6_AD  | 4  | 5  | 5  | 19,275,837 | 31,808,246  | 5p14.3   | 5p13.3   |
| LU4_L   | 3  | 6  | 11 | 19,276,742 | 25,026,731  | 6p22.3   | 11p14.3  |
| LU3_L   | 3  | 24 | 23 | 19,278,782 | 4,251,303   | Yq11.221 | Xp22.33  |
| LU18_AD | 8  | 8  | 11 | 19,287,152 | 78,980,721  | 8p21.3   | 11q14.1  |
| LU18_L  | 6  | 8  | 11 | 19,288,483 | 78,981,222  | 8p21.3   | 11q14.1  |
| LU4_AD  | 13 | 7  | 2  | 19,320,559 | 237,119,855 | 7p21.1   | 2q37.2   |
| LU3_AD  | 3  | 12 | 12 | 19,349,871 | 45,663,346  | 12p12.3  | 12q12    |
| LU21_AD | 3  | 7  | 7  | 19,353,515 | 19,629,836  | 7p21.1   | 7p21.1   |
| LU4_AD  | 3  | 7  | 23 | 19,361,067 | 2,971,512   | 7p21.1   | Xp22.33  |
| LU14_L  | 5  | 14 | 14 | 19,371,781 | 19,740,448  | 14q11.2  | 14q11.2  |
| LU15_AD | 3  | 14 | 14 | 19,375,617 | 19,735,030  | 14q11.2  | 14q11.2  |
| LU18_L  | 3  | 14 | 8  | 19,392,906 | 14,306,559  | 14q11.2  | 8p22     |
| LU18_L  | 4  | 14 | 11 | 19,400,241 | 100,847,009 | 14q11.2  | 11q22.1  |
| LU4_L   | 4  | 14 | 11 | 19,400,720 | 100,846,830 | 14q11.2  | 11q22.1  |
| LU20_AD | 3  | 6  | 14 | 19,403,734 | 58,190,367  | 6p22.3   | 14q23.1  |
| LU7_L   | 3  | 7  | 7  | 19,428,946 | 42,924,387  | 7p21.1   | 7p14.1   |
| LU12_AD | 3  | 9  | 12 | 19,461,221 | 117,013,473 | 9p22.1   | 12q24.22 |
| LU21_AD | 4  | 14 | 15 | 19,487,789 | 21,134,184  | 14q11.2  | 15q11.2  |
| LU5_L   | 8  | 17 | 17 | 19,495,471 | 19,539,256  | 17p11.2  | 17p11.2  |
| LU6_L   | 7  | 14 | 14 | 19,532,169 | 20,086,665  | 14q11.2  | 14q11.2  |
| LU3_L   | 4  | 17 | 22 | 19,538,147 | 26,142,472  | 17p11.2  | 22q12.1  |
| LU5_L   | 8  | 17 | 17 | 19,539,256 | 19,495,471  | 17p11.2  | 17p11.2  |
| LU18_AD | 3  | 6  | 2  | 19,540,207 | 70,845,917  | 6p22.3   | 2p13.3   |
| LU18_AD | 8  | 8  | 7  | 19,545,925 | 16,760,771  | 8p21.3   | 7p21.1   |
| LU18_L  | 3  | 8  | 7  | 19,547,896 | 16,760,641  | 8p21.3   | 7p21.1   |
| LU18_L  | 3  | 14 | 21 | 19,568,071 | 14,995,327  | 14q11.2  | 21q11.2  |
| LU6_L   | 5  | 16 | 16 | 19,574,392 | 19,272,618  | 16p12.3  | 16p12.3  |
| LU21_L  | 3  | 24 | 12 | 19,592,136 | 34,274,985  | Yq11.221 | 12p11.1  |

|         |    |    |    |            |             |          |          |
|---------|----|----|----|------------|-------------|----------|----------|
| LU18_AD | 4  | 13 | 14 | 19,598,325 | 20,637,362  | 13q12.11 | 14q11.2  |
| LU18_L  | 26 | 11 | 12 | 19,621,346 | 74,529,640  | 11p15.1  | 12q21.1  |
| LU18_AD | 22 | 11 | 12 | 19,621,351 | 74,532,208  | 11p15.1  | 12q21.1  |
| LU20_AD | 3  | 24 | 9  | 19,623,054 | 141,077,124 | Yq11.221 | 9q34.3   |
| LU8_L   | 3  | 24 | 3  | 19,629,113 | 197,846,737 | Yq11.221 | 3q29     |
| LU21_AD | 3  | 7  | 7  | 19,629,836 | 19,353,515  | 7p21.1   | 7p21.1   |
| LU18_AD | 31 | 11 | 5  | 19,634,856 | 16,375,429  | 11p15.1  | 5p15.1   |
| LU18_L  | 32 | 11 | 5  | 19,636,698 | 16,373,825  | 11p15.1  | 5p15.1   |
| LU7_L   | 3  | 7  | 15 | 19,637,210 | 35,950,971  | 7p21.1   | 15q14    |
| LU18_L  | 3  | 14 | 13 | 19,638,758 | 19,168,435  | 14q11.2  | 13q11    |
| LU15_AD | 4  | 11 | 11 | 19,639,631 | 19,672,738  | 11p15.1  | 11p15.1  |
| LU8_AD  | 3  | 2  | 2  | 19,639,870 | 19,671,992  | 2p24.1   | 2p24.1   |
| LU7_AD  | 4  | 20 | 12 | 19,660,383 | 2,829,911   | 20p11.23 | 12p13.33 |
| LU8_AD  | 3  | 2  | 2  | 19,671,992 | 19,639,870  | 2p24.1   | 2p24.1   |
| LU15_AD | 4  | 11 | 11 | 19,672,738 | 19,639,631  | 11p15.1  | 11p15.1  |
| LU12_L  | 18 | 8  | 8  | 19,699,420 | 9,280,005   | 8p21.3   | 8p23.1   |
| LU8_L   | 4  | 5  | 4  | 19,706,178 | 177,266,196 | 5p14.3   | 4q34.2   |
| LU21_L  | 4  | 5  | 4  | 19,706,830 | 102,824,069 | 5p14.3   | 4q24     |
| LU3_L   | 3  | 14 | 25 | 19,716,129 | 3,195,419   | 14q11.2  | 25       |
| LU15_AD | 3  | 14 | 14 | 19,735,030 | 19,375,617  | 14q11.2  | 14q11.2  |
| LU14_L  | 5  | 14 | 14 | 19,740,448 | 19,371,781  | 14q11.2  | 14q11.2  |
| LU3_AD  | 3  | 12 | 12 | 19,836,183 | 46,088,835  | 12p12.3  | 12q12    |
| LU3_AD  | 3  | 14 | 15 | 19,843,214 | 20,885,988  | 14q11.2  | 15q11.2  |
| LU18_AD | 4  | 14 | 15 | 19,843,879 | 20,887,038  | 14q11.2  | 15q11.2  |
| LU8_AD  | 3  | 13 | 13 | 19,856,973 | 19,889,397  | 13q12.11 | 13q12.11 |
| LU18_L  | 38 | 5  | 11 | 19,870,009 | 4,514,363   | 5p14.3   | 11p15.4  |
| LU18_AD | 35 | 5  | 11 | 19,870,748 | 4,513,664   | 5p14.3   | 11p15.4  |
| LU8_AD  | 3  | 13 | 13 | 19,889,397 | 19,856,973  | 13q12.11 | 13q12.11 |
| LU4_AD  | 3  | 19 | 11 | 19,895,107 | 92,837,300  | 19p13.11 | 11q21    |
| LU3_AD  | 4  | 12 | 12 | 19,901,070 | 47,476,587  | 12p12.3  | 12q13.11 |
| LU12_L  | 9  | 8  | 8  | 19,914,918 | 17,663,169  | 8p21.3   | 8p22     |
| LU15_L  | 5  | 22 | 19 | 19,925,195 | 24,037,125  | 22q11.21 | 19p12    |
| LU20_AD | 6  | 21 | 21 | 19,976,981 | 20,480,393  | 21q21.1  | 21q21.1  |
| LU3_AD  | 5  | 14 | 22 | 19,985,022 | 16,289,218  | 14q11.2  | 22q11.1  |
| LU3_L   | 4  | 14 | 22 | 19,986,715 | 16,287,533  | 14q11.2  | 22q11.1  |
| LU18_L  | 21 | 15 | 5  | 20,003,985 | 685,504     | 15q11.1  | 5p15.33  |
| LU18_AD | 22 | 15 | 5  | 20,004,172 | 686,514     | 15q11.1  | 5p15.33  |
| LU18_AD | 4  | 15 | 5  | 20,004,450 | 778,666     | 15q11.1  | 5p15.33  |
| LU18_L  | 21 | 15 | 12 | 20,005,375 | 63,068,945  | 15q11.1  | 12q14.1  |
| LU18_AD | 18 | 15 | 12 | 20,005,956 | 63,069,409  | 15q11.1  | 12q14.1  |
| LU18_AD | 16 | 5  | 5  | 20,012,793 | 20,798,549  | 5p14.3   | 5p14.3   |
| LU15_AD | 3  | 8  | 21 | 20,012,875 | 28,227,875  | 8p21.3   | 21q21.3  |
| LU18_AD | 9  | 5  | 5  | 20,014,590 | 34,405,474  | 5p14.3   | 5p13.2   |
| LU18_L  | 12 | 5  | 5  | 20,014,904 | 34,405,611  | 5p14.3   | 5p13.2   |



|         |    |    |    |            |             |          |          |
|---------|----|----|----|------------|-------------|----------|----------|
| LU18_L  | 6  | 5  | 5  | 20,017,733 | 20,792,555  | 5p14.3   | 5p14.3   |
| LU14_AD | 3  | 19 | 19 | 20,038,363 | 21,011,086  | 19p12    | 19p12    |
| LU21_AD | 12 | 5  | 5  | 20,060,621 | 172,007,628 | 5p14.3   | 5q35.1   |
| LU20_AD | 3  | 19 | 1  | 20,071,545 | 226,726,942 | 19p12    | 1q42.12  |
| LU3_L   | 15 | 12 | 12 | 20,081,482 | 80,686,253  | 12p12.2  | 12q21.31 |
| LU6_L   | 7  | 14 | 14 | 20,086,665 | 19,532,169  | 14q11.2  | 14q11.2  |
| LU8_AD  | 3  | 7  | 7  | 20,095,014 | 20,128,568  | 7p21.1   | 7p21.1   |
| LU6_L   | 4  | 19 | 19 | 20,098,286 | 20,181,540  | 19p12    | 19p12    |
| LU21_AD | 3  | 15 | 21 | 20,100,707 | 9,479,778   | 15q11.1  | 21p11.2  |
| LU14_AD | 4  | 2  | 7  | 20,125,036 | 46,085,278  | 2p24.1   | 7p12.3   |
| LU3_L   | 4  | 2  | 19 | 20,126,242 | 45,135,823  | 2p24.1   | 19q13.31 |
| LU4_L   | 3  | 10 | 10 | 20,127,124 | 20,166,056  | 10p12.31 | 10p12.31 |
| LU18_AD | 5  | 21 | 4  | 20,127,946 | 133,805,598 | 21q21.1  | 4q28.3   |
| LU8_AD  | 3  | 7  | 7  | 20,128,568 | 20,095,014  | 7p21.1   | 7p21.1   |
| LU4_L   | 3  | 10 | 10 | 20,166,056 | 20,127,124  | 10p12.31 | 10p12.31 |
| LU21_AD | 3  | 15 | 16 | 20,171,322 | 31,961,967  | 15q11.1  | 16p11.2  |
| LU4_L   | 3  | 15 | 16 | 20,173,636 | 31,961,234  | 15q11.1  | 16p11.2  |
| LU6_L   | 4  | 19 | 19 | 20,181,540 | 20,098,286  | 19p12    | 19p12    |
| LU3_L   | 4  | 19 | 10 | 20,200,556 | 27,753,581  | 19p12    | 10p12.1  |
| LU4_AD  | 4  | 6  | 23 | 20,312,318 | 96,971,229  | 6p22.3   | Xq21.33  |
| LU7_L   | 3  | 12 | 7  | 20,315,182 | 41,820,913  | 12p12.2  | 7p14.1   |
| LU7_L   | 3  | 12 | 7  | 20,330,254 | 12,703,867  | 12p12.2  | 7p21.3   |
| LU20_L  | 3  | 10 | 10 | 20,339,020 | 20,375,599  | 10p12.31 | 10p12.31 |
| LU21_AD | 3  | 8  | 8  | 20,364,376 | 20,396,403  | 8p21.3   | 8p21.3   |
| LU20_L  | 3  | 10 | 10 | 20,375,599 | 20,339,020  | 10p12.31 | 10p12.31 |
| LU7_AD  | 3  | 21 | 7  | 20,386,611 | 23,729,049  | 21q21.1  | 7p15.3   |
| LU21_AD | 3  | 8  | 8  | 20,396,403 | 20,364,376  | 8p21.3   | 8p21.3   |
| LU7_L   | 4  | 21 | 7  | 20,416,966 | 54,531,244  | 21q21.1  | 7p11.2   |
| LU18_AD | 20 | 5  | 5  | 20,438,135 | 1,427,984   | 5p14.3   | 5p15.33  |
| LU18_L  | 17 | 5  | 5  | 20,438,704 | 1,427,067   | 5p14.3   | 5p15.33  |
| LU12_L  | 9  | 8  | 8  | 20,442,107 | 29,149,722  | 8p21.3   | 8p12     |
| LU12_L  | 14 | 8  | 8  | 20,445,825 | 5,202,949   | 8p21.3   | 8p23.2   |
| LU20_L  | 3  | 8  | 8  | 20,464,778 | 20,505,680  | 8p21.3   | 8p21.3   |
| LU3_L   | 3  | 12 | 12 | 20,479,620 | 27,236,517  | 12p12.2  | 12p11.23 |
| LU20_AD | 6  | 21 | 21 | 20,480,393 | 19,976,981  | 21q21.1  | 21q21.1  |
| LU18_L  | 4  | 17 | 17 | 20,482,628 | 14,140,026  | 17p11.2  | 17p12    |
| LU16_L  | 3  | 22 | 22 | 20,503,731 | 18,813,496  | 22q11.21 | 22q11.21 |
| LU18_AD | 4  | 22 | 22 | 20,503,822 | 18,813,663  | 22q11.21 | 22q11.21 |
| LU20_L  | 3  | 8  | 8  | 20,505,680 | 20,464,778  | 8p21.3   | 8p21.3   |
| LU20_L  | 3  | 3  | 3  | 20,570,906 | 20,604,453  | 3p24.3   | 3p24.3   |
| LU21_AD | 3  | 24 | 1  | 20,578,732 | 227,714,506 | Yq11.222 | 1q42.13  |
| LU18_AD | 7  | 15 | 5  | 20,590,632 | 667,266     | 15q11.1  | 5p15.33  |
| LU18_L  | 9  | 15 | 5  | 20,591,197 | 541,225     | 15q11.1  | 5p15.33  |
| LU3_AD  | 3  | 14 | 14 | 20,602,114 | 20,632,725  | 14q11.2  | 14q11.2  |

|         |    |    |    |            |             |          |          |
|---------|----|----|----|------------|-------------|----------|----------|
| LU6_L   | 3  | 1  | 1  | 20,603,429 | 20,656,507  | 1p36.12  | 1p36.12  |
| LU20_L  | 3  | 3  | 3  | 20,604,453 | 20,570,906  | 3p24.3   | 3p24.3   |
| LU18_AD | 3  | 5  | 12 | 20,629,242 | 64,627,753  | 5p14.3   | 12q14.2  |
| LU14_L  | 4  | 13 | 1  | 20,629,539 | 144,378,539 | 13q12.11 | 1q21.1   |
| LU3_AD  | 3  | 14 | 14 | 20,632,725 | 20,602,114  | 14q11.2  | 14q11.2  |
| LU12_L  | 4  | 4  | 2  | 20,634,982 | 207,884,294 | 4p15.31  | 2q33.3   |
| LU3_L   | 4  | 14 | 21 | 20,637,233 | 14,816,008  | 14q11.2  | 21q11.2  |
| LU18_AD | 4  | 14 | 13 | 20,637,362 | 19,598,325  | 14q11.2  | 13q12.11 |
| LU7_L   | 5  | 12 | 7  | 20,643,026 | 45,912,065  | 12p12.2  | 7p12.3   |
| LU4_AD  | 3  | 3  | 16 | 20,656,361 | 34,299,724  | 3p24.3   | 16p11.2  |
| LU6_L   | 3  | 1  | 1  | 20,656,507 | 20,603,429  | 1p36.12  | 1p36.12  |
| LU20_L  | 3  | 16 | 7  | 20,688,590 | 50,107,219  | 16p12.3  | 7p12.2   |
| LU7_AD  | 5  | 12 | 7  | 20,693,416 | 39,775,283  | 12p12.2  | 7p14.1   |
| LU5_L   | 4  | 19 | 13 | 20,700,340 | 67,971,960  | 19p12    | 13q21.32 |
| LU3_AD  | 4  | 12 | 12 | 20,730,295 | 20,770,480  | 12p12.2  | 12p12.2  |
| LU7_AD  | 4  | 22 | 22 | 20,741,614 | 23,806,488  | 22q11.21 | 22q11.23 |
| LU18_L  | 4  | 22 | 22 | 20,741,799 | 23,803,371  | 22q11.21 | 22q11.23 |
| LU21_AD | 3  | 6  | 6  | 20,744,853 | 20,774,899  | 6p22.3   | 6p22.3   |
| LU18_AD | 14 | 5  | 12 | 20,751,960 | 74,031,148  | 5p14.3   | 12q21.1  |
| LU18_L  | 15 | 5  | 12 | 20,751,984 | 74,031,126  | 5p14.3   | 12q21.1  |
| LU3_AD  | 4  | 12 | 12 | 20,770,480 | 20,730,295  | 12p12.2  | 12p12.2  |
| LU21_AD | 3  | 6  | 6  | 20,774,899 | 20,744,853  | 6p22.3   | 6p22.3   |
| LU18_L  | 41 | 5  | 5  | 20,778,032 | 16,226,889  | 5p14.3   | 5p15.1   |
| LU18_AD | 31 | 5  | 5  | 20,778,524 | 16,226,898  | 5p14.3   | 5p15.1   |
| LU18_L  | 6  | 5  | 5  | 20,792,555 | 20,017,733  | 5p14.3   | 5p14.3   |
| LU18_AD | 16 | 5  | 5  | 20,798,549 | 20,012,793  | 5p14.3   | 5p14.3   |
| LU20_L  | 3  | 21 | 21 | 20,827,526 | 20,861,968  | 21q21.1  | 21q21.1  |
| LU7_L   | 3  | 19 | 19 | 20,830,866 | 20,974,266  | 19p12    | 19p12    |
| LU7_AD  | 3  | 7  | 7  | 20,837,008 | 21,925,706  | 7p21.1   | 7p15.3   |
| LU8_L   | 3  | 14 | 14 | 20,840,749 | 20,871,896  | 14q11.2  | 14q11.2  |
| LU18_L  | 3  | 15 | 14 | 20,843,852 | 107,180,208 | 15q11.2  | 14q32.33 |
| LU21_L  | 5  | 17 | 17 | 20,844,656 | 11,163,405  | 17p11.2  | 17p12    |
| LU21_AD | 9  | 17 | 17 | 20,844,856 | 11,163,177  | 17p11.2  | 17p12    |
| LU20_L  | 3  | 21 | 21 | 20,861,968 | 20,827,526  | 21q21.1  | 21q21.1  |
| LU3_AD  | 4  | 12 | 12 | 20,863,629 | 38,878,332  | 12p12.2  | 12q12    |
| LU8_L   | 3  | 14 | 14 | 20,871,896 | 20,840,749  | 14q11.2  | 14q11.2  |
| LU18_AD | 10 | 15 | 5  | 20,885,587 | 2,193,450   | 15q11.2  | 5p15.33  |
| LU18_L  | 8  | 15 | 5  | 20,885,972 | 1,081,484   | 15q11.2  | 5p15.33  |
| LU3_AD  | 3  | 15 | 14 | 20,885,988 | 19,843,214  | 15q11.2  | 14q11.2  |
| LU18_L  | 15 | 15 | 5  | 20,885,998 | 2,192,717   | 15q11.2  | 5p15.33  |
| LU18_AD | 4  | 15 | 14 | 20,887,038 | 19,843,879  | 15q11.2  | 14q11.2  |
| LU4_AD  | 10 | 18 | 5  | 20,910,432 | 63,087,582  | 18q11.2  | 5q12.2   |
| LU18_AD | 50 | 11 | 11 | 20,927,899 | 29,824,455  | 11p15.1  | 11p14.1  |
| LU18_L  | 37 | 11 | 11 | 20,928,698 | 29,823,554  | 11p15.1  | 11p14.1  |

|         |    |    |    |            |             |          |          |
|---------|----|----|----|------------|-------------|----------|----------|
| LU6_AD  | 3  | 20 | 20 | 20,954,809 | 20,988,628  | 20p11.23 | 20p11.23 |
| LU7_L   | 3  | 19 | 19 | 20,974,266 | 20,830,866  | 19p12    | 19p12    |
| LU6_AD  | 3  | 20 | 20 | 20,988,628 | 20,954,809  | 20p11.23 | 20p11.23 |
| LU14_AD | 3  | 19 | 19 | 21,011,086 | 20,038,363  | 19p12    | 19p12    |
| LU18_AD | 51 | 11 | 5  | 21,028,139 | 17,662,440  | 11p15.1  | 5p15.1   |
| LU18_L  | 14 | 11 | 5  | 21,029,451 | 17,661,678  | 11p15.1  | 5p15.1   |
| LU18_L  | 31 | 11 | 5  | 21,031,615 | 17,661,424  | 11p15.1  | 5p15.1   |
| LU7_L   | 7  | 7  | 7  | 21,052,052 | 37,558,684  | 7p15.3   | 7p14.1   |
| LU20_AD | 3  | 20 | 20 | 21,066,047 | 35,567,962  | 20p11.23 | 20q11.23 |
| LU18_AD | 8  | 12 | 12 | 21,091,886 | 68,939,485  | 12p12.2  | 12q15    |
| LU18_L  | 7  | 12 | 12 | 21,093,460 | 68,937,811  | 12p12.2  | 12q15    |
| LU7_L   | 21 | 7  | 7  | 21,129,806 | 25,166,901  | 7p15.3   | 7p15.3   |
| LU7_AD  | 6  | 7  | 7  | 21,130,809 | 25,166,046  | 7p15.3   | 7p15.3   |
| LU21_AD | 4  | 15 | 14 | 21,134,184 | 19,487,789  | 15q11.2  | 14q11.2  |
| LU4_AD  | 3  | 19 | 19 | 21,141,525 | 23,920,704  | 19p12    | 19p12    |
| LU18_AD | 4  | 15 | 5  | 21,143,433 | 15,824,709  | 15q11.2  | 5p15.1   |
| LU18_AD | 4  | 15 | 5  | 21,157,170 | 11,163,531  | 15q11.2  | 5p15.2   |
| LU18_L  | 6  | 15 | 5  | 21,157,784 | 11,164,093  | 15q11.2  | 5p15.2   |
| LU20_AD | 3  | 11 | 11 | 21,159,052 | 21,195,472  | 11p15.1  | 11p15.1  |
| LU15_L  | 3  | 17 | 6  | 21,187,096 | 50,671,134  | 17p11.2  | 6p12.3   |
| LU18_L  | 3  | 15 | 5  | 21,188,592 | 6,907,994   | 15q11.2  | 5p15.31  |
| LU20_AD | 3  | 11 | 11 | 21,195,472 | 21,159,052  | 11p15.1  | 11p15.1  |
| LU4_AD  | 6  | 15 | 10 | 21,195,865 | 38,039,163  | 15q11.2  | 10p11.1  |
| LU4_L   | 4  | 15 | 10 | 21,196,796 | 38,038,838  | 15q11.2  | 10p11.1  |
| LU18_L  | 5  | 5  | 12 | 21,223,708 | 67,489,784  | 5p14.3   | 12q14.3  |
| LU18_AD | 5  | 5  | 12 | 21,224,006 | 67,489,706  | 5p14.3   | 12q14.3  |
| LU12_AD | 8  | 13 | 2  | 21,237,228 | 78,998,352  | 13q12.11 | 2p12     |
| LU11_L  | 8  | 13 | 1  | 21,292,877 | 116,893,368 | 13q12.11 | 1p13.1   |
| LU11_AD | 20 | 13 | 1  | 21,293,961 | 116,890,558 | 13q12.11 | 1p13.1   |
| LU4_L   | 4  | 5  | 5  | 21,296,491 | 69,973,373  | 5p14.3   | 5q13.2   |
| LU3_L   | 3  | 21 | 21 | 21,296,549 | 21,330,100  | 21q21.1  | 21q21.1  |
| LU18_AD | 3  | 17 | 17 | 21,312,012 | 21,343,746  | 17p11.2  | 17p11.2  |
| LU3_L   | 3  | 12 | 12 | 21,315,342 | 21,352,109  | 12p12.1  | 12p12.1  |
| LU3_L   | 3  | 21 | 21 | 21,330,100 | 21,296,549  | 21q21.1  | 21q21.1  |
| LU18_AD | 16 | 8  | 7  | 21,334,101 | 23,460,838  | 8p21.3   | 7p15.3   |
| LU18_L  | 20 | 8  | 7  | 21,335,285 | 23,460,302  | 8p21.3   | 7p15.3   |
| LU18_AD | 3  | 17 | 17 | 21,343,746 | 21,312,012  | 17p11.2  | 17p11.2  |
| LU3_L   | 3  | 12 | 12 | 21,352,109 | 21,315,342  | 12p12.1  | 12p12.1  |
| LU20_AD | 3  | 3  | 3  | 21,401,124 | 75,725,762  | 3p24.3   | 3p12.3   |
| LU18_AD | 3  | 7  | 11 | 21,489,717 | 8,908,117   | 7p15.3   | 11p15.4  |
| LU18_AD | 8  | 7  | 5  | 21,495,954 | 821,042     | 7p15.3   | 5p15.33  |
| LU18_AD | 3  | 7  | 5  | 21,496,042 | 731,049     | 7p15.3   | 5p15.33  |
| LU18_L  | 4  | 7  | 5  | 21,496,140 | 822,447     | 7p15.3   | 5p15.33  |
| LU18_AD | 8  | 7  | 5  | 21,498,170 | 15,423,489  | 7p15.3   | 5p15.1   |

|         |    |    |    |            |             |          |          |
|---------|----|----|----|------------|-------------|----------|----------|
| LU12_L  | 3  | 5  | 5  | 21,504,648 | 29,560,054  | 5p14.3   | 5p13.3   |
| LU3_AD  | 3  | 12 | 12 | 21,505,196 | 28,647,659  | 12p12.1  | 12p11.22 |
| LU5_L   | 3  | 7  | 7  | 21,545,126 | 21,583,846  | 7p15.3   | 7p15.3   |
| LU21_AD | 3  | 17 | 2  | 21,547,266 | 90,406,320  | 17p11.2  | 2p11.2   |
| LU3_L   | 3  | 5  | 6  | 21,562,877 | 57,551,276  | 5p14.3   | 6p11.2   |
| LU5_L   | 3  | 7  | 7  | 21,583,846 | 21,545,126  | 7p15.3   | 7p15.3   |
| LU4_AD  | 5  | 7  | 7  | 21,588,176 | 21,544,327  | 7p15.3   | 7p15.3   |
| LU18_L  | 4  | 7  | 6  | 21,590,554 | 80,235,406  | 7p15.3   | 6q14.1   |
| LU7_L   | 4  | 19 | 2  | 21,595,352 | 48,613,412  | 19p12    | 2p16.3   |
| LU5_AD  | 4  | 19 | 20 | 21,597,231 | 38,352,701  | 19p12    | 20q12    |
| LU18_AD | 34 | 7  | 11 | 21,613,756 | 17,973,223  | 7p15.3   | 11p15.1  |
| LU3_L   | 3  | 19 | 19 | 21,613,882 | 22,572,875  | 19p12    | 19p12    |
| LU18_L  | 27 | 7  | 11 | 21,617,551 | 17,973,476  | 7p15.3   | 11p15.1  |
| LU4_AD  | 3  | 7  | 7  | 21,619,589 | 18,103,074  | 7p15.3   | 7p21.1   |
| LU18_AD | 3  | 16 | 3  | 21,640,662 | 164,534,562 | 16p12.2  | 3q26.1   |
| LU20_AD | 3  | 16 | 1  | 21,644,939 | 66,886,447  | 16p12.2  | 1p31.3   |
| LU18_AD | 3  | 5  | 11 | 21,660,757 | 41,670,043  | 5p14.3   | 11p12    |
| LU18_AD | 3  | 5  | 7  | 21,666,747 | 10,762,046  | 5p14.3   | 7p21.3   |
| LU20_AD | 4  | 1  | 1  | 21,792,239 | 151,987,827 | 1p36.12  | 1q21.3   |
| LU5_L   | 3  | 1  | 1  | 21,792,590 | 120,532,906 | 1p36.12  | 1p12     |
| LU4_L   | 3  | 1  | 1  | 21,793,287 | 120,533,045 | 1p36.12  | 1p12     |
| LU3_AD  | 5  | 3  | 3  | 21,794,125 | 29,761,426  | 3p24.3   | 3p24.1   |
| LU18_AD | 3  | 19 | 19 | 21,797,253 | 23,456,123  | 19p12    | 19p12    |
| LU18_AD | 5  | 5  | 25 | 21,818,703 | 1,626,713   | 5p14.3   | 25       |
| LU7_AD  | 4  | 7  | 12 | 21,835,395 | 68,814,932  | 7p15.3   | 12q15    |
| LU7_L   | 5  | 7  | 12 | 21,836,076 | 68,815,337  | 7p15.3   | 12q15    |
| LU21_AD | 3  | 19 | 20 | 21,850,049 | 23,453,521  | 19p12    | 20p11.21 |
| LU15_AD | 9  | 9  | 3  | 21,865,875 | 27,238,092  | 9p21.3   | 3p24.1   |
| LU21_L  | 3  | 17 | 9  | 21,874,415 | 44,903,714  | 17p11.2  | 9p11.2   |
| LU4_L   | 5  | 13 | 18 | 21,884,939 | 42,186,460  | 13q12.11 | 18q12.3  |
| LU18_AD | 29 | 21 | 11 | 21,900,579 | 6,740,199   | 21q21.1  | 11p15.4  |
| LU18_L  | 32 | 21 | 11 | 21,902,047 | 6,740,066   | 21q21.1  | 11p15.4  |
| LU18_L  | 5  | 15 | 15 | 21,902,103 | 23,020,803  | 15q11.2  | 15q11.2  |
| LU18_AD | 5  | 15 | 12 | 21,905,148 | 68,565,447  | 15q11.2  | 12q15    |
| LU18_AD | 14 | 15 | 12 | 21,905,286 | 71,801,594  | 15q11.2  | 12q21.1  |
| LU18_L  | 13 | 15 | 12 | 21,905,675 | 71,800,637  | 15q11.2  | 12q21.1  |
| LU15_L  | 4  | 7  | 12 | 21,918,916 | 105,906,669 | 7p15.3   | 12q23.3  |
| LU18_L  | 67 | 15 | 12 | 21,920,313 | 63,743,275  | 15q11.2  | 12q14.2  |
| LU18_AD | 58 | 15 | 12 | 21,921,562 | 63,743,312  | 15q11.2  | 12q14.2  |
| LU20_AD | 3  | 6  | 6  | 21,921,670 | 21,958,433  | 6p22.3   | 6p22.3   |
| LU18_AD | 15 | 15 | 12 | 21,924,425 | 63,743,784  | 15q11.2  | 12q14.2  |
| LU7_AD  | 3  | 7  | 7  | 21,925,706 | 20,837,008  | 7p15.3   | 7p21.1   |
| LU20_AD | 3  | 6  | 6  | 21,958,433 | 21,921,670  | 6p22.3   | 6p22.3   |
| LU15_AD | 5  | 9  | 14 | 21,974,528 | 62,218,806  | 9p21.3   | 14q23.2  |

|         |    |    |    |            |             |          |          |
|---------|----|----|----|------------|-------------|----------|----------|
| LU18_AD | 4  | 5  | 5  | 21,980,992 | 27,580,713  | 5p14.3   | 5p14.1   |
| LU21_L  | 4  | 9  | 5  | 22,042,793 | 177,173,977 | 9p21.3   | 5q35.3   |
| LU21_AD | 7  | 9  | 5  | 22,042,803 | 177,174,229 | 9p21.3   | 5q35.3   |
| LU4_AD  | 3  | 9  | 9  | 22,136,576 | 22,179,457  | 9p21.3   | 9p21.3   |
| LU4_AD  | 5  | 14 | 3  | 22,163,640 | 43,641,597  | 14q11.2  | 3p22.1   |
| LU18_L  | 4  | 15 | 5  | 22,167,555 | 11,164,109  | 15q11.2  | 5p15.2   |
| LU18_AD | 4  | 15 | 5  | 22,168,810 | 11,163,957  | 15q11.2  | 5p15.2   |
| LU18_AD | 10 | 5  | 5  | 22,169,062 | 18,192,263  | 5p14.3   | 5p15.1   |
| LU4_AD  | 3  | 9  | 9  | 22,179,457 | 22,136,576  | 9p21.3   | 9p21.3   |
| LU21_L  | 3  | 20 | 20 | 22,251,019 | 22,291,761  | 20p11.22 | 20p11.22 |
| LU4_AD  | 10 | 20 | 20 | 22,265,804 | 23,683,260  | 20p11.22 | 20p11.21 |
| LU4_L   | 3  | 20 | 20 | 22,266,558 | 23,683,933  | 20p11.22 | 20p11.21 |
| LU21_L  | 3  | 20 | 20 | 22,291,761 | 22,251,019  | 20p11.22 | 20p11.22 |
| LU18_AD | 5  | 22 | 11 | 22,306,854 | 14,822,455  | 22q11.22 | 11p15.2  |
| LU3_L   | 3  | 18 | 18 | 22,317,013 | 22,366,680  | 18q11.2  | 18q11.2  |
| LU18_AD | 9  | 8  | 8  | 22,325,493 | 23,309,171  | 8p21.3   | 8p21.2   |
| LU18_L  | 5  | 8  | 8  | 22,328,064 | 23,309,069  | 8p21.3   | 8p21.2   |
| LU3_L   | 3  | 18 | 18 | 22,366,680 | 22,317,013  | 18q11.2  | 18q11.2  |
| LU3_L   | 3  | 15 | 15 | 22,376,492 | 22,444,418  | 15q11.2  | 15q11.2  |
| LU21_L  | 5  | 11 | 11 | 22,382,332 | 22,412,362  | 11p14.3  | 11p14.3  |
| LU5_AD  | 3  | 12 | 6  | 22,385,695 | 73,856,692  | 12p12.1  | 6q13     |
| LU21_L  | 5  | 11 | 11 | 22,412,362 | 22,382,332  | 11p14.3  | 11p14.3  |
| LU18_AD | 3  | 7  | 7  | 22,430,893 | 22,468,836  | 7p15.3   | 7p15.3   |
| LU14_L  | 3  | 10 | 8  | 22,432,368 | 50,564,649  | 10p12.31 | 8q11.21  |
| LU18_L  | 3  | 10 | 19 | 22,433,806 | 5,157,487   | 10p12.31 | 19p13.3  |
| LU3_L   | 3  | 15 | 15 | 22,444,418 | 22,376,492  | 15q11.2  | 15q11.2  |
| LU3_L   | 3  | 15 | 15 | 22,448,126 | 22,486,352  | 15q11.2  | 15q11.2  |
| LU18_AD | 3  | 7  | 7  | 22,468,836 | 22,430,893  | 7p15.3   | 7p15.3   |
| LU4_L   | 3  | 14 | 5  | 22,480,559 | 56,720,235  | 14q11.2  | 5q11.2   |
| LU3_L   | 3  | 15 | 15 | 22,486,352 | 22,448,126  | 15q11.2  | 15q11.2  |
| LU4_AD  | 3  | 14 | 14 | 22,505,307 | 22,539,797  | 14q11.2  | 14q11.2  |
| LU6_AD  | 7  | 1  | 11 | 22,539,155 | 67,176,874  | 1p36.12  | 11q13.2  |
| LU4_AD  | 3  | 14 | 14 | 22,539,797 | 22,505,307  | 14q11.2  | 14q11.2  |
| LU3_L   | 3  | 19 | 19 | 22,572,875 | 21,613,882  | 19p12    | 19p12    |
| LU4_AD  | 11 | 1  | 16 | 22,585,551 | 49,059,323  | 1p36.12  | 16q12.1  |
| LU18_L  | 3  | 4  | 5  | 22,587,917 | 146,612,340 | 4p15.2   | 5q32     |
| LU5_L   | 5  | 4  | 1  | 22,604,646 | 147,797,079 | 4p15.2   | 1q21.2   |
| LU4_AD  | 11 | 20 | 20 | 22,608,355 | 25,308,677  | 20p11.21 | 20p11.21 |
| LU21_L  | 3  | 21 | 21 | 22,681,817 | 22,718,544  | 21q21.1  | 21q21.1  |
| LU18_L  | 5  | 11 | 12 | 22,690,709 | 72,378,376  | 11p14.3  | 12q21.1  |
| LU8_AD  | 3  | 14 | 12 | 22,705,105 | 59,252,436  | 14q11.2  | 12q14.1  |
| LU20_L  | 4  | 23 | 23 | 22,705,636 | 22,735,685  | Xp22.11  | Xp22.11  |
| LU18_L  | 3  | 14 | 2  | 22,706,502 | 76,097,417  | 14q11.2  | 2p12     |
| LU21_AD | 3  | 14 | 11 | 22,708,507 | 26,614,882  | 14q11.2  | 11p14.2  |

|         |    |    |    |            |             |          |          |
|---------|----|----|----|------------|-------------|----------|----------|
| LU21_L  | 3  | 21 | 21 | 22,718,544 | 22,681,817  | 21q21.1  | 21q21.1  |
| LU18_AD | 68 | 15 | 12 | 22,734,569 | 57,890,928  | 15q11.2  | 12q13.3  |
| LU18_L  | 78 | 15 | 12 | 22,734,656 | 57,890,354  | 15q11.2  | 12q13.3  |
| LU20_L  | 4  | 23 | 23 | 22,735,685 | 22,705,636  | Xp22.11  | Xp22.11  |
| LU18_L  | 3  | 15 | 15 | 22,737,006 | 62,561,594  | 15q11.2  | 15q22.2  |
| LU7_L   | 5  | 7  | 15 | 22,738,600 | 36,002,557  | 7p15.3   | 15q14    |
| LU18_L  | 7  | 15 | 12 | 22,744,188 | 57,892,199  | 15q11.2  | 12q13.3  |
| LU18_AD | 8  | 15 | 5  | 22,746,067 | 624,268     | 15q11.2  | 5p15.33  |
| LU3_AD  | 4  | 12 | 12 | 22,785,179 | 43,551,639  | 12p12.1  | 12q12    |
| LU6_L   | 6  | 2  | 16 | 22,785,941 | 18,584,722  | 2p24.1   | 16p12.3  |
| LU6_L   | 5  | 2  | 16 | 22,786,234 | 24,852,303  | 2p24.1   | 16p12.1  |
| LU6_AD  | 7  | 2  | 2  | 22,790,820 | 30,190,099  | 2p24.1   | 2p23.1   |
| LU6_L   | 8  | 2  | 2  | 22,791,396 | 30,190,342  | 2p24.1   | 2p23.1   |
| LU18_L  | 3  | 13 | 13 | 22,791,404 | 22,841,508  | 13q12.11 | 13q12.11 |
| LU18_AD | 7  | 15 | 12 | 22,820,909 | 58,012,149  | 15q11.2  | 12q13.3  |
| LU18_L  | 13 | 15 | 12 | 22,823,597 | 58,010,727  | 15q11.2  | 12q13.3  |
| LU18_L  | 7  | 7  | 5  | 22,831,123 | 34,104,200  | 7p15.3   | 5p13.2   |
| LU18_L  | 3  | 13 | 13 | 22,841,508 | 22,791,404  | 13q12.11 | 13q12.11 |
| LU4_L   | 3  | 1  | 16 | 22,856,393 | 68,230,653  | 1p36.12  | 16q22.1  |
| LU18_AD | 3  | 11 | 7  | 22,895,112 | 10,760,059  | 11p14.3  | 7p21.3   |
| LU7_AD  | 4  | 7  | 7  | 22,900,555 | 77,854      | 7p15.3   | 7p22.3   |
| LU12_L  | 6  | 8  | 8  | 22,907,082 | 8,555,678   | 8p21.3   | 8p23.1   |
| LU18_AD | 5  | 15 | 5  | 22,918,240 | 1,340,380   | 15q11.2  | 5p15.33  |
| LU18_L  | 5  | 15 | 5  | 22,918,340 | 1,340,329   | 15q11.2  | 5p15.33  |
| LU6_AD  | 5  | 2  | 16 | 22,919,341 | 24,722,068  | 2p24.1   | 16p12.1  |
| LU18_AD | 4  | 11 | 7  | 22,928,093 | 10,662,845  | 11p14.3  | 7p21.3   |
| LU4_AD  | 3  | 19 | 21 | 22,934,411 | 41,111,947  | 19p12    | 21q22.2  |
| LU5_L   | 3  | 14 | 14 | 22,936,214 | 23,000,748  | 14q11.2  | 14q11.2  |
| LU4_AD  | 3  | 19 | 19 | 22,937,122 | 24,313,527  | 19p12    | 19p12    |
| LU21_L  | 3  | 19 | 4  | 22,937,430 | 87,123      | 19p12    | 4p16.3   |
| LU18_AD | 11 | 7  | 7  | 22,943,972 | 23,006,221  | 7p15.3   | 7p15.3   |
| LU18_L  | 8  | 7  | 7  | 22,944,042 | 23,006,176  | 7p15.3   | 7p15.3   |
| LU18_AD | 6  | 7  | 11 | 22,961,612 | 2,317,489   | 7p15.3   | 11p15.5  |
| LU18_L  | 3  | 15 | 5  | 22,999,904 | 120,373,304 | 15q11.2  | 5q23.1   |
| LU18_AD | 4  | 15 | 5  | 23,000,240 | 120,373,080 | 15q11.2  | 5q23.1   |
| LU5_L   | 3  | 14 | 14 | 23,000,748 | 22,936,214  | 14q11.2  | 14q11.2  |
| LU18_L  | 8  | 7  | 7  | 23,006,176 | 22,944,042  | 7p15.3   | 7p15.3   |
| LU18_AD | 11 | 7  | 7  | 23,006,221 | 22,943,972  | 7p15.3   | 7p15.3   |
| LU8_L   | 3  | 20 | 20 | 23,011,295 | 23,051,776  | 20p11.21 | 20p11.21 |
| LU18_L  | 5  | 15 | 15 | 23,020,803 | 21,902,103  | 15q11.2  | 15q11.2  |
| LU7_L   | 3  | 7  | 7  | 23,024,083 | 48,326,532  | 7p15.3   | 7p12.3   |
| LU7_AD  | 3  | 7  | 7  | 23,024,715 | 48,327,488  | 7p15.3   | 7p12.3   |
| LU8_L   | 3  | 20 | 20 | 23,051,776 | 23,011,295  | 20p11.21 | 20p11.21 |
| LU3_L   | 4  | 2  | 2  | 23,068,560 | 23,103,935  | 2p24.1   | 2p24.1   |

|         |    |    |    |            |             |          |          |
|---------|----|----|----|------------|-------------|----------|----------|
| LU3_L   | 4  | 2  | 2  | 23,103,935 | 23,068,560  | 2p24.1   | 2p24.1   |
| LU3_AD  | 3  | 12 | 12 | 23,147,365 | 23,184,016  | 12p12.1  | 12p12.1  |
| LU3_AD  | 6  | 10 | 10 | 23,152,004 | 28,485,520  | 10p12.2  | 10p12.1  |
| LU21_AD | 4  | 6  | 11 | 23,162,878 | 95,665,656  | 6p22.3   | 11q21    |
| LU7_L   | 4  | 7  | 15 | 23,174,221 | 34,569,858  | 7p15.3   | 15q14    |
| LU16_L  | 4  | 22 | 22 | 23,177,925 | 23,215,074  | 22q11.22 | 22q11.22 |
| LU3_AD  | 4  | 14 | 13 | 23,178,718 | 61,795,268  | 14q11.2  | 13q21.2  |
| LU3_AD  | 3  | 12 | 12 | 23,184,016 | 23,147,365  | 12p12.1  | 12p12.1  |
| LU18_AD | 7  | 15 | 12 | 23,211,126 | 64,332,089  | 15q11.2  | 12q14.2  |
| LU18_L  | 7  | 15 | 12 | 23,211,854 | 64,332,091  | 15q11.2  | 12q14.2  |
| LU16_L  | 4  | 22 | 22 | 23,215,074 | 23,177,925  | 22q11.22 | 22q11.22 |
| LU7_L   | 3  | 22 | 22 | 23,239,693 | 25,714,683  | 22q11.22 | 22q11.23 |
| LU15_AD | 3  | 22 | 22 | 23,243,056 | 32,598,527  | 22q11.22 | 22q12.3  |
| LU3_AD  | 4  | 5  | 3  | 23,298,862 | 106,822,381 | 5p14.3   | 3q13.12  |
| LU5_L   | 3  | 4  | 4  | 23,299,522 | 23,337,891  | 4p15.2   | 4p15.2   |
| LU18_L  | 5  | 8  | 8  | 23,309,069 | 22,328,064  | 8p21.2   | 8p21.3   |
| LU18_AD | 9  | 8  | 8  | 23,309,171 | 22,325,493  | 8p21.2   | 8p21.3   |
| LU5_L   | 3  | 4  | 4  | 23,337,891 | 23,299,522  | 4p15.2   | 4p15.2   |
| LU7_L   | 3  | 12 | 7  | 23,368,682 | 47,721,792  | 12p12.1  | 7p12.3   |
| LU7_AD  | 3  | 15 | 15 | 23,393,984 | 28,585,692  | 15q11.2  | 15q13.1  |
| LU11_AD | 16 | 6  | 6  | 23,402,760 | 23,493,958  | 6p22.3   | 6p22.3   |
| LU8_L   | 3  | 10 | 10 | 23,423,188 | 107,446,076 | 10p12.2  | 10q25.1  |
| LU21_L  | 3  | 10 | 23 | 23,427,764 | 41,533,593  | 10p12.2  | Xp11.4   |
| LU3_AD  | 3  | 20 | 4  | 23,448,622 | 102,826,785 | 20p11.21 | 4q24     |
| LU21_AD | 3  | 20 | 19 | 23,453,521 | 21,850,049  | 20p11.21 | 19p12    |
| LU18_AD | 3  | 19 | 19 | 23,456,123 | 21,797,253  | 19p12    | 19p12    |
| LU18_L  | 20 | 7  | 8  | 23,460,302 | 21,335,285  | 7p15.3   | 8p21.3   |
| LU18_AD | 16 | 7  | 8  | 23,460,838 | 21,334,101  | 7p15.3   | 8p21.3   |
| LU7_L   | 6  | 7  | 12 | 23,466,646 | 67,037,722  | 7p15.3   | 12q14.3  |
| LU4_L   | 3  | 2  | 2  | 23,471,952 | 23,504,479  | 2p24.1   | 2p24.1   |
| LU7_L   | 3  | 6  | 6  | 23,474,716 | 23,505,905  | 6p22.3   | 6p22.3   |
| LU11_AD | 16 | 6  | 6  | 23,493,958 | 23,402,760  | 6p22.3   | 6p22.3   |
| LU18_AD | 4  | 7  | 11 | 23,497,584 | 43,418,379  | 7p15.3   | 11p12    |
| LU18_L  | 5  | 7  | 11 | 23,498,666 | 43,417,261  | 7p15.3   | 11p12    |
| LU4_L   | 3  | 2  | 2  | 23,504,479 | 23,471,952  | 2p24.1   | 2p24.1   |
| LU7_L   | 3  | 6  | 6  | 23,505,905 | 23,474,716  | 6p22.3   | 6p22.3   |
| LU4_AD  | 5  | 7  | 2  | 23,517,890 | 237,095,100 | 7p15.3   | 2q37.2   |
| LU4_L   | 3  | 19 | 7  | 23,524,640 | 56,646,298  | 19p12    | 7p11.2   |
| LU4_AD  | 3  | 15 | 15 | 23,601,241 | 34,683,737  | 15q11.2  | 15q14    |
| LU3_L   | 3  | 24 | 6  | 23,611,791 | 48,843,348  | Yq11.223 | 6p12.3   |
| LU21_L  | 3  | 24 | 24 | 23,669,231 | 24,451,095  | Yq11.223 | Yq11.223 |
| LU4_AD  | 10 | 20 | 20 | 23,683,260 | 22,265,804  | 20p11.21 | 20p11.22 |
| LU4_L   | 3  | 20 | 20 | 23,683,933 | 22,266,558  | 20p11.21 | 20p11.22 |
| LU5_L   | 3  | 7  | 7  | 23,715,683 | 24,472,363  | 7p15.3   | 7p15.3   |

|         |    |    |    |            |             |          |          |
|---------|----|----|----|------------|-------------|----------|----------|
| LU21_L  | 3  | 24 | 24 | 23,718,376 | 25,670,516  | Yq11.223 | Yq11.223 |
| LU7_AD  | 3  | 7  | 21 | 23,729,049 | 20,386,611  | 7p15.3   | 21q21.1  |
| LU7_AD  | 37 | 10 | 12 | 23,729,238 | 73,581,325  | 10p12.2  | 12q21.1  |
| LU7_L   | 71 | 10 | 12 | 23,729,507 | 73,583,195  | 10p12.2  | 12q21.1  |
| LU7_L   | 3  | 7  | 12 | 23,733,895 | 67,223,688  | 7p15.3   | 12q14.3  |
| LU5_AD  | 3  | 9  | 9  | 23,739,683 | 23,770,286  | 9p21.3   | 9p21.3   |
| LU3_AD  | 3  | 4  | 4  | 23,752,134 | 23,783,950  | 4p15.2   | 4p15.2   |
| LU7_L   | 3  | 8  | 8  | 23,758,567 | 23,795,815  | 8p21.2   | 8p21.2   |
| LU7_L   | 8  | 7  | 12 | 23,758,799 | 67,574,179  | 7p15.3   | 12q14.3  |
| LU18_AD | 4  | 22 | 8  | 23,764,953 | 25,949,482  | 22q11.23 | 8p21.2   |
| LU5_AD  | 3  | 9  | 9  | 23,770,286 | 23,739,683  | 9p21.3   | 9p21.3   |
| LU3_AD  | 3  | 4  | 4  | 23,783,950 | 23,752,134  | 4p15.2   | 4p15.2   |
| LU21_AD | 3  | 20 | 10 | 23,791,291 | 69,446,550  | 20p11.21 | 10q21.3  |
| LU7_L   | 3  | 8  | 8  | 23,795,815 | 23,758,567  | 8p21.2   | 8p21.2   |
| LU18_L  | 4  | 22 | 22 | 23,803,371 | 20,741,799  | 22q11.23 | 22q11.21 |
| LU7_AD  | 4  | 22 | 22 | 23,806,488 | 20,741,614  | 22q11.23 | 22q11.21 |
| LU8_L   | 4  | 20 | 20 | 23,812,773 | 23,911,232  | 20p11.21 | 20p11.21 |
| LU20_AD | 3  | 18 | 17 | 23,818,721 | 30,091,493  | 18q11.2  | 17q11.2  |
| LU4_AD  | 8  | 16 | 1  | 23,865,633 | 226,629,540 | 16p12.2  | 1q42.12  |
| LU20_AD | 4  | 24 | 2  | 23,876,064 | 56,946,067  | Yq11.223 | 2p16.1   |
| LU8_L   | 4  | 20 | 20 | 23,911,232 | 23,812,773  | 20p11.21 | 20p11.21 |
| LU4_AD  | 3  | 19 | 19 | 23,920,704 | 21,141,525  | 19p12    | 19p12    |
| LU7_L   | 7  | 10 | 7  | 23,948,226 | 28,092,898  | 10p12.2  | 7p15.1   |
| LU3_L   | 4  | 2  | 6  | 23,954,314 | 84,458,690  | 2p24.1   | 6q14.2   |
| LU20_AD | 3  | 20 | 5  | 23,969,090 | 68,927,919  | 20p11.21 | 5q13.2   |
| LU18_L  | 3  | 15 | 15 | 24,022,330 | 24,068,054  | 15q11.2  | 15q11.2  |
| LU15_L  | 5  | 19 | 22 | 24,037,125 | 19,925,195  | 19p12    | 22q11.21 |
| LU3_AD  | 5  | 16 | 16 | 24,065,525 | 24,101,188  | 16p12.2  | 16p12.2  |
| LU18_L  | 3  | 15 | 15 | 24,068,054 | 24,022,330  | 15q11.2  | 15q11.2  |
| LU21_AD | 3  | 6  | 6  | 24,068,258 | 27,652,019  | 6p22.3   | 6p22.1   |
| LU12_AD | 3  | 13 | 14 | 24,098,231 | 32,179,818  | 13q12.12 | 14q12    |
| LU3_AD  | 5  | 16 | 16 | 24,101,188 | 24,065,525  | 16p12.2  | 16p12.2  |
| LU20_AD | 4  | 8  | 15 | 24,101,232 | 55,804,308  | 8p21.2   | 15q21.3  |
| LU3_L   | 4  | 6  | 6  | 24,186,304 | 24,218,600  | 6p22.3   | 6p22.3   |
| LU4_L   | 4  | 22 | 2  | 24,198,454 | 47,811,979  | 22q11.23 | 2p16.3   |
| LU3_L   | 4  | 6  | 6  | 24,218,600 | 24,186,304  | 6p22.3   | 6p22.3   |
| LU6_AD  | 4  | 24 | 24 | 24,238,626 | 28,385,122  | Yq11.223 | Yq11.23  |
| LU18_L  | 3  | 6  | 6  | 24,284,898 | 24,319,256  | 6p22.3   | 6p22.3   |
| LU20_AD | 12 | 21 | 21 | 24,290,171 | 24,238,073  | 21q21.2  | 21q21.2  |
| LU20_L  | 5  | 21 | 21 | 24,290,366 | 24,240,354  | 21q21.2  | 21q21.2  |
| LU18_AD | 4  | 5  | 23 | 24,307,105 | 117,428,878 | 5p14.2   | Xq24     |
| LU21_AD | 3  | 5  | 1  | 24,308,247 | 62,644,560  | 5p14.2   | 1p31.3   |
| LU4_AD  | 3  | 19 | 19 | 24,313,527 | 22,937,122  | 19p12    | 19p12    |
| LU18_L  | 3  | 6  | 6  | 24,319,256 | 24,284,898  | 6p22.3   | 6p22.3   |



|         |    |    |    |            |             |          |          |
|---------|----|----|----|------------|-------------|----------|----------|
| LU18_AD | 3  | 14 | 14 | 24,336,758 | 24,393,266  | 14q11.2  | 14q11.2  |
| LU18_L  | 5  | 21 | 15 | 24,350,105 | 36,813,266  | 21q21.2  | 15q14    |
| LU18_AD | 6  | 21 | 15 | 24,350,131 | 36,813,514  | 21q21.2  | 15q14    |
| LU7_AD  | 4  | 10 | 7  | 24,357,317 | 39,839,266  | 10p12.2  | 7p14.1   |
| LU18_AD | 3  | 14 | 14 | 24,393,266 | 24,336,758  | 14q11.2  | 14q11.2  |
| LU7_L   | 38 | 10 | 12 | 24,416,232 | 61,604,354  | 10p12.2  | 12q14.1  |
| LU7_AD  | 15 | 10 | 12 | 24,416,320 | 61,603,349  | 10p12.2  | 12q14.1  |
| LU4_AD  | 3  | 14 | 9  | 24,444,717 | 131,613,748 | 14q11.2  | 9q34.11  |
| LU21_L  | 3  | 24 | 24 | 24,451,095 | 23,669,231  | Yq11.223 | Yq11.223 |
| LU20_AD | 3  | 18 | 7  | 24,465,545 | 99,563,127  | 18q11.2  | 7q22.1   |
| LU5_L   | 3  | 7  | 7  | 24,472,363 | 23,715,683  | 7p15.3   | 7p15.3   |
| LU18_L  | 10 | 5  | 5  | 24,481,449 | 92,488,444  | 5p14.2   | 5q15     |
| LU18_AD | 7  | 5  | 5  | 24,483,106 | 92,489,178  | 5p14.2   | 5q15     |
| LU14_AD | 22 | 5  | 5  | 24,484,216 | 9,389,717   | 5p14.2   | 5p15.31  |
| LU14_L  | 27 | 5  | 5  | 24,484,223 | 9,387,351   | 5p14.2   | 5p15.31  |
| LU11_L  | 3  | 15 | 5  | 24,502,232 | 77,397,221  | 15q11.2  | 5q14.1   |
| LU7_L   | 3  | 4  | 1  | 24,505,368 | 82,538,617  | 4p15.2   | 1p31.1   |
| LU21_AD | 3  | 24 | 24 | 24,506,480 | 25,650,333  | Yq11.223 | Yq11.223 |
| LU3_L   | 5  | 20 | 20 | 24,538,627 | 24,572,361  | 20p11.21 | 20p11.21 |
| LU7_AD  | 5  | 22 | 11 | 24,549,099 | 4,183,238   | 22q11.23 | 11p15.4  |
| LU7_L   | 8  | 22 | 11 | 24,551,019 | 4,183,044   | 22q11.23 | 11p15.4  |
| LU5_L   | 3  | 11 | 11 | 24,552,261 | 24,592,351  | 11p14.3  | 11p14.3  |
| LU15_L  | 3  | 24 | 24 | 24,557,763 | 9,153,922   | Yq11.223 | Yp11.2   |
| LU3_L   | 5  | 20 | 20 | 24,572,361 | 24,538,627  | 20p11.21 | 20p11.21 |
| LU18_L  | 12 | 7  | 12 | 24,580,932 | 74,749,739  | 7p15.3   | 12q21.1  |
| LU4_AD  | 3  | 7  | 7  | 24,589,675 | 24,620,833  | 7p15.3   | 7p15.3   |
| LU5_L   | 3  | 11 | 11 | 24,592,351 | 24,552,261  | 11p14.3  | 11p14.3  |
| LU4_AD  | 3  | 7  | 7  | 24,620,833 | 24,589,675  | 7p15.3   | 7p15.3   |
| LU12_L  | 11 | 8  | 8  | 24,641,771 | 71,078,638  | 8p21.2   | 8q13.3   |
| LU12_L  | 11 | 8  | 8  | 24,657,154 | 53,477,319  | 8p21.2   | 8q11.23  |
| LU12_L  | 12 | 8  | 8  | 24,661,430 | 5,202,803   | 8p21.2   | 8p23.2   |
| LU21_L  | 3  | 24 | 24 | 24,691,772 | 28,166,362  | Yq11.223 | Yq11.23  |
| LU7_L   | 29 | 7  | 12 | 24,696,907 | 71,774,435  | 7p15.3   | 12q21.1  |
| LU7_AD  | 15 | 7  | 12 | 24,697,221 | 71,774,181  | 7p15.3   | 12q21.1  |
| LU6_AD  | 5  | 16 | 2  | 24,722,068 | 22,919,341  | 16p12.1  | 2p24.1   |
| LU4_AD  | 4  | 7  | 7  | 24,776,985 | 24,806,525  | 7p15.3   | 7p15.3   |
| LU4_AD  | 4  | 7  | 7  | 24,806,525 | 24,776,985  | 7p15.3   | 7p15.3   |
| LU12_L  | 3  | 7  | 17 | 24,831,151 | 33,831,602  | 7p15.3   | 17q12    |
| LU5_L   | 3  | 7  | 3  | 24,833,282 | 161,762,775 | 7p15.3   | 3q26.1   |
| LU6_L   | 5  | 16 | 2  | 24,852,303 | 22,786,234  | 16p12.1  | 2p24.1   |
| LU6_L   | 5  | 16 | 2  | 24,857,631 | 28,452,130  | 16p12.1  | 2p23.2   |
| LU6_AD  | 3  | 16 | 2  | 24,857,987 | 28,451,945  | 16p12.1  | 2p23.2   |
| LU6_L   | 3  | 16 | 2  | 24,873,446 | 25,849,537  | 16p12.1  | 2p23.3   |
| LU6_L   | 9  | 16 | 2  | 24,873,710 | 28,454,159  | 16p12.1  | 2p23.2   |

|         |    |    |    |            |             |          |          |
|---------|----|----|----|------------|-------------|----------|----------|
| LU6_AD  | 4  | 16 | 2  | 24,876,338 | 28,459,106  | 16p12.1  | 2p23.2   |
| LU18_AD | 22 | 21 | 7  | 24,881,272 | 16,399,306  | 21q21.2  | 7p21.2   |
| LU18_L  | 29 | 21 | 7  | 24,881,835 | 16,398,586  | 21q21.2  | 7p21.2   |
| LU21_AD | 3  | 24 | 24 | 24,888,365 | 8,033,514   | Yq11.223 | Yp11.2   |
| LU12_L  | 20 | 8  | 8  | 24,908,703 | 104,547,102 | 8p21.2   | 8q22.3   |
| LU12_L  | 21 | 8  | 8  | 24,913,947 | 36,652,097  | 8p21.2   | 8p11.23  |
| LU7_AD  | 5  | 7  | 7  | 24,925,577 | 40,938,659  | 7p15.3   | 7p14.1   |
| LU14_AD | 12 | 5  | 1  | 24,947,242 | 153,561,127 | 5p14.1   | 1q21.3   |
| LU14_L  | 5  | 5  | 1  | 24,949,645 | 153,559,301 | 5p14.1   | 1q21.3   |
| LU14_AD | 4  | 5  | 1  | 24,952,604 | 155,407,281 | 5p14.1   | 1q22     |
| LU6_AD  | 11 | 16 | 2  | 24,957,552 | 42,253,160  | 16p12.1  | 2p21     |
| LU6_L   | 23 | 16 | 2  | 24,958,866 | 42,251,115  | 16p12.1  | 2p21     |
| LU11_AD | 18 | 23 | 23 | 24,972,603 | 25,002,338  | Xp21.3   | Xp21.3   |
| LU3_L   | 5  | 6  | 10 | 24,976,951 | 32,480,568  | 6p22.3   | 10p11.22 |
| LU11_AD | 18 | 23 | 23 | 25,002,338 | 24,972,603  | Xp21.3   | Xp21.3   |
| LU18_L  | 5  | 22 | 22 | 25,022,807 | 25,054,792  | 22q11.23 | 22q11.23 |
| LU4_L   | 3  | 11 | 6  | 25,026,731 | 19,276,742  | 11p14.3  | 6p22.3   |
| LU18_L  | 11 | 8  | 5  | 25,042,581 | 6,090,973   | 8p21.2   | 5p15.32  |
| LU18_AD | 10 | 8  | 5  | 25,045,322 | 6,089,243   | 8p21.2   | 5p15.32  |
| LU18_L  | 5  | 22 | 22 | 25,054,792 | 25,022,807  | 22q11.23 | 22q11.23 |
| LU20_L  | 3  | 2  | 2  | 25,055,567 | 25,088,913  | 2p23.3   | 2p23.3   |
| LU20_L  | 3  | 2  | 2  | 25,088,913 | 25,055,567  | 2p23.3   | 2p23.3   |
| LU7_L   | 3  | 7  | 7  | 25,121,011 | 4,989,897   | 7p15.3   | 7p22.1   |
| LU8_L   | 5  | 11 | 11 | 25,145,446 | 25,179,511  | 11p14.3  | 11p14.3  |
| LU4_AD  | 3  | 13 | 13 | 25,154,184 | 52,814,472  | 13q12.12 | 13q14.3  |
| LU21_AD | 3  | 13 | 13 | 25,163,373 | 52,800,855  | 13q12.12 | 13q14.3  |
| LU7_AD  | 6  | 7  | 7  | 25,166,046 | 21,130,809  | 7p15.3   | 7p15.3   |
| LU7_L   | 21 | 7  | 7  | 25,166,901 | 21,129,806  | 7p15.3   | 7p15.3   |
| LU11_L  | 3  | 20 | 12 | 25,167,735 | 59,043,916  | 20p11.21 | 12q14.1  |
| LU8_L   | 5  | 11 | 11 | 25,179,511 | 25,145,446  | 11p14.3  | 11p14.3  |
| LU4_AD  | 3  | 24 | 12 | 25,231,357 | 8,940,290   | Yq11.223 | 12p13.31 |
| LU6_L   | 3  | 18 | 18 | 25,254,926 | 25,288,749  | 18q12.1  | 18q12.1  |
| LU6_L   | 3  | 18 | 18 | 25,288,749 | 25,254,926  | 18q12.1  | 18q12.1  |
| LU14_L  | 4  | 17 | 24 | 25,289,604 | 13,637,183  | 17q11.1  | Yq11.21  |
| LU4_AD  | 11 | 20 | 20 | 25,308,677 | 22,608,355  | 20p11.21 | 20p11.21 |
| LU7_AD  | 6  | 10 | 12 | 25,333,058 | 64,831,466  | 10p12.1  | 12q14.2  |
| LU7_L   | 6  | 10 | 12 | 25,335,707 | 64,831,177  | 10p12.1  | 12q14.2  |
| LU7_L   | 14 | 7  | 7  | 25,360,560 | 4,251,049   | 7p15.3   | 7p22.2   |
| LU7_AD  | 14 | 7  | 7  | 25,361,155 | 4,250,651   | 7p15.3   | 7p22.2   |
| LU6_L   | 3  | 1  | 1  | 25,393,762 | 25,425,589  | 1p36.11  | 1p36.11  |
| LU6_L   | 3  | 1  | 1  | 25,425,589 | 25,393,762  | 1p36.11  | 1p36.11  |
| LU4_AD  | 4  | 23 | 4  | 25,443,695 | 179,145,623 | Xp21.3   | 4q34.3   |
| LU7_L   | 8  | 7  | 12 | 25,498,258 | 71,643,856  | 7p15.3   | 12q21.1  |
| LU7_AD  | 3  | 7  | 12 | 25,498,393 | 71,643,890  | 7p15.3   | 12q21.1  |

|         |    |    |    |            |             |          |          |
|---------|----|----|----|------------|-------------|----------|----------|
| LU3_L   | 3  | 23 | 23 | 25,544,052 | 25,577,594  | Xp21.3   | Xp21.3   |
| LU20_AD | 5  | 17 | 6  | 25,560,225 | 56,757,831  | 17q11.1  | 6p12.1   |
| LU16_AD | 6  | 9  | 9  | 25,562,915 | 45,692,675  | 9p21.3   | 9p11.2   |
| LU3_L   | 3  | 23 | 23 | 25,577,594 | 25,544,052  | Xp21.3   | Xp21.3   |
| LU21_AD | 3  | 24 | 24 | 25,650,333 | 24,506,480  | Yq11.223 | Yq11.223 |
| LU21_L  | 3  | 24 | 24 | 25,670,516 | 23,718,376  | Yq11.223 | Yq11.223 |
| LU16_L  | 5  | 9  | 7  | 25,711,475 | 15,789,248  | 9p21.2   | 7p21.2   |
| LU16_AD | 16 | 9  | 7  | 25,711,677 | 15,788,957  | 9p21.2   | 7p21.2   |
| LU7_L   | 3  | 22 | 22 | 25,714,683 | 23,239,693  | 22q11.23 | 22q11.22 |
| LU20_AD | 5  | 22 | 6  | 25,744,045 | 170,116,072 | 22q11.23 | 6q27     |
| LU4_AD  | 4  | 20 | 4  | 25,762,716 | 190,675,816 | 20p11.1  | 4q35.2   |
| LU21_L  | 3  | 20 | 4  | 25,762,822 | 190,677,777 | 20p11.1  | 4q35.2   |
| LU16_AD | 5  | 9  | 9  | 25,768,848 | 44,975,435  | 9p21.2   | 9p11.2   |
| LU18_L  | 4  | 20 | 22 | 25,782,943 | 17,228,958  | 20p11.1  | 22q11.1  |
| LU3_AD  | 3  | 20 | 22 | 25,783,843 | 17,230,042  | 20p11.1  | 22q11.1  |
| LU15_AD | 3  | 15 | 15 | 25,806,887 | 26,849,130  | 15q12    | 15q12    |
| LU15_L  | 6  | 15 | 15 | 25,807,484 | 26,850,770  | 15q12    | 15q12    |
| LU7_L   | 5  | 7  | 7  | 25,809,780 | 38,894,076  | 7p15.2   | 7p14.1   |
| LU7_L   | 4  | 7  | 12 | 25,815,440 | 69,378,928  | 7p15.2   | 12q15    |
| LU21_L  | 3  | 10 | 10 | 25,822,918 | 25,858,113  | 10p12.1  | 10p12.1  |
| LU6_L   | 3  | 2  | 16 | 25,840,735 | 15,283,405  | 2p23.3   | 16p13.11 |
| LU4_AD  | 6  | 1  | 1  | 25,849,425 | 51,368,972  | 1p36.11  | 1p32.3   |
| LU6_L   | 3  | 2  | 16 | 25,849,537 | 24,873,446  | 2p23.3   | 16p12.1  |
| LU6_L   | 8  | 2  | 2  | 25,853,900 | 38,567,641  | 2p23.3   | 2p22.2   |
| LU21_L  | 3  | 10 | 10 | 25,858,113 | 25,822,918  | 10p12.1  | 10p12.1  |
| LU6_L   | 5  | 2  | 2  | 25,859,199 | 27,951,623  | 2p23.3   | 2p23.2   |
| LU18_AD | 5  | 8  | 5  | 25,933,239 | 15,538,639  | 8p21.2   | 5p15.1   |
| LU18_L  | 43 | 5  | 5  | 25,939,406 | 27,104,463  | 5p14.1   | 5p14.1   |
| LU18_AD | 47 | 5  | 5  | 25,940,282 | 27,104,054  | 5p14.1   | 5p14.1   |
| LU18_AD | 4  | 8  | 22 | 25,949,482 | 23,764,953  | 8p21.2   | 22q11.23 |
| LU18_L  | 4  | 7  | 7  | 25,966,244 | 26,004,763  | 7p15.2   | 7p15.2   |
| LU4_AD  | 3  | 17 | 17 | 26,002,777 | 18,294,988  | 17q11.2  | 17p11.2  |
| LU18_L  | 4  | 7  | 7  | 26,004,763 | 25,966,244  | 7p15.2   | 7p15.2   |
| LU11_AD | 3  | 10 | 7  | 26,011,492 | 31,506,631  | 10p12.1  | 7p14.3   |
| LU20_AD | 3  | 17 | 1  | 26,017,992 | 181,220,789 | 17q11.2  | 1q25.3   |
| LU18_AD | 46 | 5  | 5  | 26,024,522 | 757,025     | 5p14.1   | 5p15.33  |
| LU18_L  | 38 | 5  | 5  | 26,025,229 | 756,879     | 5p14.1   | 5p15.33  |
| LU3_L   | 4  | 14 | 14 | 26,036,623 | 26,068,027  | 14q12    | 14q12    |
| LU3_L   | 4  | 14 | 14 | 26,068,027 | 26,036,623  | 14q12    | 14q12    |
| LU3_L   | 3  | 21 | 21 | 26,070,476 | 26,108,550  | 21q21.2  | 21q21.2  |
| LU8_L   | 6  | 20 | 2  | 26,073,031 | 132,594,074 | 20p11.1  | 2q21.2   |
| LU18_L  | 3  | 7  | 7  | 26,087,352 | 28,772,282  | 7p15.2   | 7p15.1   |
| LU3_L   | 3  | 21 | 21 | 26,108,550 | 26,070,476  | 21q21.2  | 21q21.2  |
| LU3_L   | 4  | 22 | 17 | 26,142,472 | 19,538,147  | 22q12.1  | 17p11.2  |

|         |    |    |    |            |             |          |          |
|---------|----|----|----|------------|-------------|----------|----------|
| LU7_L   | 3  | 14 | 14 | 26,147,519 | 26,182,318  | 14q12    | 14q12    |
| LU7_L   | 3  | 14 | 14 | 26,182,318 | 26,147,519  | 14q12    | 14q12    |
| LU18_AD | 3  | 9  | 4  | 26,186,677 | 66,744,542  | 9p21.2   | 4q13.2   |
| LU15_AD | 12 | 12 | 12 | 26,218,479 | 26,258,785  | 12p12.1  | 12p12.1  |
| LU15_L  | 12 | 12 | 12 | 26,220,649 | 26,258,600  | 12p12.1  | 12p12.1  |
| LU15_L  | 3  | 5  | 3  | 26,222,314 | 197,361,907 | 5p14.1   | 3q29     |
| LU15_L  | 12 | 12 | 12 | 26,258,600 | 26,220,649  | 12p12.1  | 12p12.1  |
| LU15_AD | 12 | 12 | 12 | 26,258,785 | 26,218,479  | 12p12.1  | 12p12.1  |
| LU6_AD  | 3  | 20 | 2  | 26,308,246 | 29,180,963  | 20p11.1  | 2p23.2   |
| LU11_AD | 9  | 1  | 1  | 26,330,239 | 47,595,051  | 1p36.11  | 1p33     |
| LU14_AD | 11 | 5  | 10 | 26,359,985 | 42,385,208  | 5p14.1   | 10q11.21 |
| LU20_L  | 5  | 24 | 15 | 26,404,246 | 78,154,957  | Yq11.23  | 15q24.3  |
| LU21_AD | 3  | 24 | 15 | 26,404,253 | 78,154,957  | Yq11.23  | 15q24.3  |
| LU15_L  | 3  | 7  | 7  | 26,417,676 | 26,448,205  | 7p15.2   | 7p15.2   |
| LU15_L  | 3  | 7  | 7  | 26,448,205 | 26,417,676  | 7p15.2   | 7p15.2   |
| LU7_L   | 5  | 7  | 12 | 26,470,502 | 68,586,903  | 7p15.2   | 12q15    |
| LU11_AD | 3  | 16 | 23 | 26,476,981 | 17,327,816  | 16p12.1  | Xp22.13  |
| LU4_AD  | 4  | 10 | 10 | 26,539,541 | 26,570,484  | 10p12.1  | 10p12.1  |
| LU12_L  | 5  | 8  | 8  | 26,568,382 | 42,131,101  | 8p21.2   | 8p11.21  |
| LU4_AD  | 4  | 10 | 10 | 26,570,484 | 26,539,541  | 10p12.1  | 10p12.1  |
| LU21_AD | 3  | 11 | 14 | 26,614,882 | 22,708,507  | 11p14.2  | 14q11.2  |
| LU16_AD | 3  | 18 | 18 | 26,779,811 | 26,835,624  | 18q12.1  | 18q12.1  |
| LU16_AD | 3  | 18 | 18 | 26,835,624 | 26,779,811  | 18q12.1  | 18q12.1  |
| LU15_AD | 3  | 15 | 15 | 26,849,130 | 25,806,887  | 15q12    | 15q12    |
| LU15_L  | 6  | 15 | 15 | 26,850,770 | 25,807,484  | 15q12    | 15q12    |
| LU8_L   | 3  | 2  | 2  | 26,895,877 | 26,931,740  | 2p23.3   | 2p23.3   |
| LU20_AD | 3  | 11 | 11 | 26,926,201 | 26,957,023  | 11p14.2  | 11p14.2  |
| LU8_L   | 3  | 2  | 2  | 26,931,740 | 26,895,877  | 2p23.3   | 2p23.3   |
| LU7_L   | 5  | 7  | 7  | 26,950,564 | 35,359,052  | 7p15.2   | 7p14.2   |
| LU20_AD | 3  | 11 | 11 | 26,957,023 | 26,926,201  | 11p14.2  | 11p14.2  |
| LU18_AD | 4  | 7  | 5  | 26,971,109 | 822,348     | 7p15.2   | 5p15.33  |
| LU12_L  | 4  | 3  | 11 | 27,046,317 | 86,547,726  | 3p24.1   | 11q14.2  |
| LU11_AD | 14 | 18 | 12 | 27,075,148 | 66,424,547  | 18q12.1  | 12q14.3  |
| LU18_AD | 47 | 5  | 5  | 27,104,054 | 25,940,282  | 5p14.1   | 5p14.1   |
| LU18_L  | 43 | 5  | 5  | 27,104,463 | 25,939,406  | 5p14.1   | 5p14.1   |
| LU11_AD | 3  | 6  | 9  | 27,155,360 | 95,285,522  | 6p22.1   | 9q22.31  |
| LU18_AD | 10 | 7  | 8  | 27,156,624 | 3,943,200   | 7p15.2   | 8p23.2   |
| LU8_L   | 4  | 11 | 16 | 27,157,438 | 76,371,262  | 11p14.2  | 16q23.1  |
| LU18_L  | 17 | 7  | 8  | 27,157,716 | 3,943,249   | 7p15.2   | 8p23.2   |
| LU18_AD | 6  | 5  | 12 | 27,212,730 | 64,934,060  | 5p14.1   | 12q14.2  |
| LU3_L   | 3  | 12 | 12 | 27,236,517 | 20,479,620  | 12p11.23 | 12p12.2  |
| LU15_AD | 9  | 3  | 9  | 27,238,092 | 21,865,875  | 3p24.1   | 9p21.3   |
| LU18_L  | 6  | 5  | 12 | 27,239,204 | 71,821,903  | 5p14.1   | 12q21.1  |
| LU18_AD | 12 | 5  | 12 | 27,239,691 | 71,823,149  | 5p14.1   | 12q21.1  |

|         |     |    |    |            |             |          |          |
|---------|-----|----|----|------------|-------------|----------|----------|
| LU18_AD | 20  | 5  | 12 | 27,296,016 | 64,867,070  | 5p14.1   | 12q14.2  |
| LU18_L  | 19  | 5  | 12 | 27,297,818 | 64,866,391  | 5p14.1   | 12q14.2  |
| LU21_L  | 3   | 8  | 11 | 27,351,219 | 82,338,659  | 8p21.2   | 11q14.1  |
| LU20_AD | 4   | 2  | 2  | 27,377,555 | 27,421,646  | 2p23.3   | 2p23.3   |
| LU20_AD | 4   | 2  | 2  | 27,421,646 | 27,377,555  | 2p23.3   | 2p23.3   |
| LU18_AD | 3   | 5  | 5  | 27,527,513 | 551,433     | 5p14.1   | 5p15.33  |
| LU18_AD | 103 | 5  | 5  | 27,528,281 | 533,109     | 5p14.1   | 5p15.33  |
| LU18_L  | 83  | 5  | 5  | 27,532,549 | 531,221     | 5p14.1   | 5p15.33  |
| LU3_AD  | 3   | 24 | 15 | 27,577,456 | 84,920,838  | Yq11.23  | 15q25.2  |
| LU14_AD | 3   | 8  | 8  | 27,578,265 | 27,619,002  | 8p21.1   | 8p21.1   |
| LU18_AD | 4   | 5  | 5  | 27,580,713 | 21,980,992  | 5p14.1   | 5p14.3   |
| LU11_AD | 3   | 21 | 8  | 27,603,204 | 3,098,843   | 21q21.3  | 8p23.2   |
| LU14_AD | 3   | 8  | 8  | 27,619,002 | 27,578,265  | 8p21.1   | 8p21.1   |
| LU21_AD | 3   | 6  | 6  | 27,652,019 | 24,068,258  | 6p22.1   | 6p22.3   |
| LU20_L  | 3   | 16 | 16 | 27,676,667 | 27,717,938  | 16p12.1  | 16p12.1  |
| LU18_AD | 3   | 22 | 22 | 27,700,784 | 27,734,768  | 22q12.1  | 22q12.1  |
| LU20_L  | 3   | 16 | 16 | 27,717,938 | 27,676,667  | 16p12.1  | 16p12.1  |
| LU18_AD | 3   | 22 | 22 | 27,734,768 | 27,700,784  | 22q12.1  | 22q12.1  |
| LU3_L   | 4   | 10 | 19 | 27,753,581 | 20,200,556  | 10p12.1  | 19p12    |
| LU4_AD  | 4   | 13 | 10 | 27,791,002 | 5,097,959   | 13q12.13 | 10p15.1  |
| LU18_AD | 3   | 16 | 16 | 27,831,661 | 27,864,434  | 16p12.1  | 16p12.1  |
| LU18_AD | 3   | 16 | 16 | 27,864,434 | 27,831,661  | 16p12.1  | 16p12.1  |
| LU6_L   | 4   | 2  | 16 | 27,934,825 | 15,274,376  | 2p23.2   | 16p13.11 |
| LU6_L   | 5   | 2  | 2  | 27,951,623 | 25,859,199  | 2p23.2   | 2p23.3   |
| LU8_L   | 3   | 4  | 4  | 28,003,017 | 28,033,232  | 4p15.1   | 4p15.1   |
| LU4_AD  | 3   | 18 | 18 | 28,015,198 | 28,049,172  | 18q12.1  | 18q12.1  |
| LU8_L   | 3   | 4  | 4  | 28,033,232 | 28,003,017  | 4p15.1   | 4p15.1   |
| LU4_AD  | 3   | 18 | 18 | 28,049,172 | 28,015,198  | 18q12.1  | 18q12.1  |
| LU7_L   | 7   | 7  | 10 | 28,092,898 | 23,948,226  | 7p15.1   | 10p12.2  |
| LU18_AD | 3   | 3  | 3  | 28,143,099 | 28,203,031  | 3p24.1   | 3p24.1   |
| LU21_L  | 3   | 24 | 24 | 28,166,362 | 24,691,772  | Yq11.23  | Yq11.223 |
| LU11_AD | 18  | 18 | 20 | 28,171,729 | 57,114,558  | 18q12.1  | 20q13.32 |
| LU11_L  | 5   | 18 | 20 | 28,173,214 | 57,115,076  | 18q12.1  | 20q13.32 |
| LU18_AD | 3   | 3  | 3  | 28,203,031 | 28,143,099  | 3p24.1   | 3p24.1   |
| LU21_L  | 3   | 7  | 7  | 28,207,616 | 28,247,521  | 7p15.1   | 7p15.1   |
| LU15_AD | 3   | 21 | 8  | 28,227,875 | 20,012,875  | 21q21.3  | 8p21.3   |
| LU21_L  | 3   | 7  | 7  | 28,247,521 | 28,207,616  | 7p15.1   | 7p15.1   |
| LU5_AD  | 3   | 12 | 12 | 28,297,676 | 28,338,546  | 12p11.22 | 12p11.22 |
| LU5_AD  | 3   | 12 | 12 | 28,338,546 | 28,297,676  | 12p11.22 | 12p11.22 |
| LU18_L  | 5   | 5  | 12 | 28,344,146 | 71,244,773  | 5p14.1   | 12q15    |
| LU12_AD | 4   | 19 | 6  | 28,370,893 | 118,905,200 | 19q11    | 6q22.31  |
| LU6_AD  | 4   | 24 | 24 | 28,385,122 | 24,238,626  | Yq11.23  | Yq11.223 |
| LU3_L   | 3   | 9  | 9  | 28,402,870 | 28,433,559  | 9p21.1   | 9p21.1   |
| LU3_L   | 3   | 9  | 9  | 28,433,559 | 28,402,870  | 9p21.1   | 9p21.1   |

|         |    |    |    |            |             |          |          |
|---------|----|----|----|------------|-------------|----------|----------|
| LU6_AD  | 3  | 2  | 16 | 28,451,945 | 24,857,987  | 2p23.2   | 16p12.1  |
| LU6_L   | 5  | 2  | 16 | 28,452,130 | 24,857,631  | 2p23.2   | 16p12.1  |
| LU14_L  | 3  | 19 | 19 | 28,453,058 | 28,494,092  | 19q11    | 19q11    |
| LU11_AD | 4  | 16 | 1  | 28,460,259 | 98,977,776  | 16p11.2  | 1p21.3   |
| LU6_L   | 5  | 2  | 2  | 28,464,016 | 35,860,727  | 2p23.2   | 2p22.3   |
| LU6_AD  | 3  | 2  | 2  | 28,465,380 | 35,859,732  | 2p23.2   | 2p22.3   |
| LU18_AD | 6  | 5  | 15 | 28,469,651 | 36,607,028  | 5p14.1   | 15q14    |
| LU18_L  | 6  | 5  | 15 | 28,470,095 | 36,606,985  | 5p14.1   | 15q14    |
| LU3_AD  | 6  | 10 | 10 | 28,485,520 | 23,152,004  | 10p12.1  | 10p12.2  |
| LU14_L  | 3  | 19 | 19 | 28,494,092 | 28,453,058  | 19q11    | 19q11    |
| LU4_AD  | 4  | 5  | 5  | 28,555,312 | 28,587,947  | 5p14.1   | 5p14.1   |
| LU3_L   | 3  | 4  | 4  | 28,556,529 | 28,587,551  | 4p15.1   | 4p15.1   |
| LU6_L   | 6  | 2  | 2  | 28,581,202 | 42,504,928  | 2p23.2   | 2p21     |
| LU6_AD  | 4  | 2  | 2  | 28,581,687 | 42,504,489  | 2p23.2   | 2p21     |
| LU7_AD  | 3  | 15 | 15 | 28,585,692 | 23,393,984  | 15q13.1  | 15q11.2  |
| LU3_L   | 3  | 4  | 4  | 28,587,551 | 28,556,529  | 4p15.1   | 4p15.1   |
| LU4_AD  | 4  | 5  | 5  | 28,587,947 | 28,555,312  | 5p14.1   | 5p14.1   |
| LU6_L   | 6  | 2  | 16 | 28,594,188 | 16,307,037  | 2p23.2   | 16p13.11 |
| LU18_L  | 6  | 5  | 15 | 28,602,245 | 36,531,529  | 5p14.1   | 15q14    |
| LU18_AD | 28 | 5  | 15 | 28,602,571 | 36,530,107  | 5p14.1   | 15q14    |
| LU18_L  | 10 | 5  | 15 | 28,604,673 | 36,530,619  | 5p14.1   | 15q14    |
| LU14_AD | 6  | 22 | 1  | 28,616,068 | 208,266,490 | 22q12.1  | 1q32.2   |
| LU3_AD  | 3  | 12 | 12 | 28,647,659 | 21,505,196  | 12p11.22 | 12p12.1  |
| LU12_L  | 4  | 8  | 8  | 28,706,022 | 103,242,198 | 8p21.1   | 8q22.3   |
| LU6_L   | 5  | 24 | 6  | 28,715,557 | 43,710,316  | Yq11.23  | 6p21.1   |
| LU18_L  | 3  | 7  | 7  | 28,772,282 | 26,087,352  | 7p15.1   | 7p15.2   |
| LU18_L  | 3  | 11 | 11 | 28,797,734 | 29,049,246  | 11p14.1  | 11p14.1  |
| LU7_L   | 10 | 7  | 12 | 28,844,035 | 63,825,095  | 7p14.3   | 12q14.2  |
| LU7_AD  | 10 | 7  | 12 | 28,844,630 | 63,825,420  | 7p14.3   | 12q14.2  |
| LU7_L   | 13 | 7  | 12 | 28,846,579 | 63,827,252  | 7p14.3   | 12q14.2  |
| LU21_L  | 21 | 9  | 9  | 28,864,231 | 29,414,013  | 9p21.1   | 9p21.1   |
| LU21_AD | 13 | 9  | 9  | 28,864,242 | 29,415,016  | 9p21.1   | 9p21.1   |
| LU14_AD | 3  | 22 | 14 | 28,869,676 | 37,178,529  | 22q12.1  | 14q13.3  |
| LU12_AD | 3  | 14 | 11 | 28,888,290 | 61,818,759  | 14q12    | 11q12.3  |
| LU18_L  | 3  | 15 | 15 | 28,946,196 | 100,333,770 | 15q13.1  | 15q26.3  |
| LU8_L   | 19 | 23 | 23 | 28,958,925 | 29,090,139  | Xp21.3   | Xp21.3   |
| LU8_AD  | 7  | 23 | 23 | 28,959,913 | 29,089,985  | Xp21.3   | Xp21.3   |
| LU6_L   | 3  | 2  | 2  | 29,002,992 | 29,261,898  | 2p23.2   | 2p23.2   |
| LU18_L  | 3  | 11 | 11 | 29,049,246 | 28,797,734  | 11p14.1  | 11p14.1  |
| LU18_L  | 5  | 15 | 5  | 29,064,814 | 2,890,848   | 15q13.1  | 5p15.33  |
| LU3_AD  | 16 | 22 | 8  | 29,065,206 | 126,533,705 | 22q12.1  | 8q24.13  |
| LU3_L   | 5  | 22 | 8  | 29,065,460 | 126,533,223 | 22q12.1  | 8q24.13  |
| LU20_AD | 5  | 19 | 19 | 29,069,919 | 29,110,752  | 19q12    | 19q12    |
| LU8_AD  | 7  | 23 | 23 | 29,089,985 | 28,959,913  | Xp21.3   | Xp21.3   |

|         |    |    |    |            |             |          |          |
|---------|----|----|----|------------|-------------|----------|----------|
| LU8_L   | 19 | 23 | 23 | 29,090,139 | 28,958,925  | Xp21.3   | Xp21.3   |
| LU20_AD | 5  | 19 | 19 | 29,110,752 | 29,069,919  | 19q12    | 19q12    |
| LU11_AD | 9  | 1  | 1  | 29,125,897 | 16,555,228  | 1p35.3   | 1p36.13  |
| LU12_L  | 9  | 8  | 8  | 29,149,722 | 20,442,107  | 8p12     | 8p21.3   |
| LU4_AD  | 5  | 8  | 8  | 29,158,324 | 108,588,606 | 8p12     | 8q23.1   |
| LU8_L   | 3  | 8  | 11 | 29,165,976 | 101,110,155 | 8p12     | 11q22.1  |
| LU6_AD  | 3  | 2  | 20 | 29,180,963 | 26,308,246  | 2p23.2   | 20p11.1  |
| LU3_AD  | 3  | 6  | 5  | 29,217,051 | 97,773,596  | 6p22.1   | 5q15     |
| LU6_AD  | 4  | 1  | 11 | 29,236,293 | 79,041,291  | 1p35.3   | 11q14.1  |
| LU6_L   | 3  | 2  | 2  | 29,261,898 | 29,002,992  | 2p23.2   | 2p23.2   |
| LU11_L  | 4  | 18 | 12 | 29,335,194 | 107,173,990 | 18q12.1  | 12q23.3  |
| LU16_L  | 3  | 6  | 6  | 29,378,074 | 29,413,355  | 6p22.1   | 6p22.1   |
| LU21_AD | 3  | 9  | 9  | 29,382,795 | 38,418,666  | 9p21.1   | 9p13.1   |
| LU21_L  | 7  | 9  | 9  | 29,383,243 | 38,418,773  | 9p21.1   | 9p13.1   |
| LU6_L   | 10 | 2  | 2  | 29,384,180 | 41,728,278  | 2p23.2   | 2p22.1   |
| LU6_AD  | 5  | 2  | 2  | 29,384,800 | 41,726,568  | 2p23.2   | 2p22.1   |
| LU21_L  | 4  | 9  | 9  | 29,385,045 | 42,758,534  | 9p21.1   | 9p12     |
| LU16_L  | 3  | 6  | 6  | 29,413,355 | 29,378,074  | 6p22.1   | 6p22.1   |
| LU21_L  | 21 | 9  | 9  | 29,414,013 | 28,864,231  | 9p21.1   | 9p21.1   |
| LU21_AD | 13 | 9  | 9  | 29,415,016 | 28,864,242  | 9p21.1   | 9p21.1   |
| LU5_L   | 3  | 13 | 13 | 29,416,971 | 29,448,757  | 13q12.3  | 13q12.3  |
| LU5_L   | 3  | 13 | 13 | 29,448,757 | 29,416,971  | 13q12.3  | 13q12.3  |
| LU3_AD  | 6  | 12 | 12 | 29,469,258 | 47,030,982  | 12p11.22 | 12q13.11 |
| LU12_L  | 3  | 5  | 5  | 29,560,054 | 21,504,648  | 5p13.3   | 5p14.3   |
| LU21_AD | 5  | 20 | 9  | 29,563,633 | 46,162,525  | 20q11.21 | 9p11.2   |
| LU21_AD | 7  | 9  | 5  | 29,577,779 | 167,819,303 | 9p21.1   | 5q34     |
| LU12_L  | 7  | 17 | 17 | 29,613,705 | 5,254,565   | 17q11.2  | 17p13.2  |
| LU21_L  | 3  | 13 | 13 | 29,625,750 | 29,655,253  | 13q12.3  | 13q12.3  |
| LU16_L  | 8  | 7  | 5  | 29,651,313 | 4,968,824   | 7p14.3   | 5p15.32  |
| LU21_L  | 3  | 13 | 13 | 29,655,253 | 29,625,750  | 13q12.3  | 13q12.3  |
| LU16_AD | 9  | 7  | 5  | 29,656,928 | 4,959,208   | 7p14.3   | 5p15.32  |
| LU20_AD | 3  | 7  | 3  | 29,684,296 | 101,352,258 | 7p14.3   | 3q12.3   |
| LU18_L  | 17 | 11 | 5  | 29,695,938 | 16,469,266  | 11p14.1  | 5p15.1   |
| LU18_AD | 14 | 11 | 5  | 29,696,076 | 16,468,643  | 11p14.1  | 5p15.1   |
| LU18_AD | 4  | 16 | 3  | 29,725,762 | 97,905,262  | 16p11.2  | 3q11.2   |
| LU16_L  | 5  | 7  | 20 | 29,748,368 | 4,377,366   | 7p14.3   | 20p13    |
| LU16_AD | 6  | 7  | 20 | 29,748,533 | 4,378,577   | 7p14.3   | 20p13    |
| LU16_L  | 10 | 7  | 5  | 29,754,840 | 1,617,617   | 7p14.3   | 5p15.33  |
| LU16_AD | 13 | 7  | 5  | 29,756,227 | 1,616,951   | 7p14.3   | 5p15.33  |
| LU3_AD  | 5  | 3  | 3  | 29,761,426 | 21,794,125  | 3p24.1   | 3p24.3   |
| LU18_AD | 4  | 21 | 2  | 29,767,683 | 149,014,357 | 21q21.3  | 2q23.1   |
| LU20_AD | 7  | 6  | 6  | 29,783,058 | 31,380,512  | 6p22.1   | 6p21.33  |
| LU4_L   | 3  | 9  | 9  | 29,809,876 | 29,855,188  | 9p21.1   | 9p21.1   |
| LU18_L  | 6  | 11 | 7  | 29,821,503 | 10,035,910  | 11p14.1  | 7p21.3   |

|         |    |    |    |            |             |          |          |
|---------|----|----|----|------------|-------------|----------|----------|
| LU18_L  | 37 | 11 | 11 | 29,823,554 | 20,928,698  | 11p14.1  | 11p15.1  |
| LU18_AD | 50 | 11 | 11 | 29,824,455 | 20,927,899  | 11p14.1  | 11p15.1  |
| LU21_L  | 4  | 6  | 1  | 29,843,456 | 55,096,213  | 6p22.1   | 1p32.3   |
| LU12_L  | 3  | 6  | 5  | 29,847,070 | 113,049,663 | 6p22.1   | 5q22.2   |
| LU18_L  | 3  | 6  | 4  | 29,847,149 | 45,046,673  | 6p22.1   | 4p12     |
| LU14_AD | 5  | 6  | 6  | 29,854,945 | 31,239,589  | 6p22.1   | 6p21.33  |
| LU4_L   | 3  | 9  | 9  | 29,855,188 | 29,809,876  | 9p21.1   | 9p21.1   |
| LU11_AD | 7  | 13 | 13 | 29,897,740 | 30,056,019  | 13q12.3  | 13q12.3  |
| LU11_L  | 4  | 13 | 13 | 29,903,977 | 30,054,507  | 13q12.3  | 13q12.3  |
| LU3_L   | 3  | 20 | 20 | 29,966,111 | 29,996,788  | 20q11.21 | 20q11.21 |
| LU5_L   | 3  | 18 | 13 | 29,992,407 | 53,212,120  | 18q12.1  | 13q14.3  |
| LU3_L   | 3  | 20 | 20 | 29,996,788 | 29,966,111  | 20q11.21 | 20q11.21 |
| LU11_L  | 4  | 13 | 13 | 30,054,507 | 29,903,977  | 13q12.3  | 13q12.3  |
| LU11_AD | 7  | 13 | 13 | 30,056,019 | 29,897,740  | 13q12.3  | 13q12.3  |
| LU11_AD | 17 | 13 | 1  | 30,063,596 | 109,822,555 | 13q12.3  | 1p13.3   |
| LU11_L  | 14 | 13 | 1  | 30,063,929 | 109,823,005 | 13q12.3  | 1p13.3   |
| LU6_L   | 3  | 2  | 16 | 30,073,293 | 33,682,155  | 2p23.1   | 16p11.2  |
| LU15_L  | 4  | 18 | 10 | 30,082,588 | 101,026,518 | 18q12.1  | 10q24.2  |
| LU20_AD | 3  | 17 | 18 | 30,091,493 | 23,818,721  | 17q11.2  | 18q11.2  |
| LU18_L  | 5  | 1  | 1  | 30,124,219 | 30,606,271  | 1p35.3   | 1p35.2   |
| LU12_AD | 3  | 14 | 14 | 30,154,774 | 30,187,002  | 14q12    | 14q12    |
| LU12_AD | 3  | 14 | 14 | 30,187,002 | 30,154,774  | 14q12    | 14q12    |
| LU6_AD  | 7  | 2  | 2  | 30,190,099 | 22,790,820  | 2p23.1   | 2p24.1   |
| LU6_L   | 8  | 2  | 2  | 30,190,342 | 22,791,396  | 2p23.1   | 2p24.1   |
| LU6_L   | 14 | 2  | 2  | 30,190,969 | 38,776,862  | 2p23.1   | 2p22.1   |
| LU6_AD  | 6  | 2  | 2  | 30,193,384 | 38,774,835  | 2p23.1   | 2p22.1   |
| LU6_L   | 3  | 2  | 16 | 30,238,645 | 18,595,863  | 2p23.1   | 16p12.3  |
| LU6_L   | 6  | 2  | 2  | 30,243,513 | 42,505,709  | 2p23.1   | 2p21     |
| LU18_AD | 3  | 1  | 1  | 30,288,883 | 30,341,393  | 1p35.2   | 1p35.2   |
| LU18_L  | 4  | 3  | 10 | 30,319,711 | 86,946,182  | 3p24.1   | 10q23.1  |
| LU6_L   | 9  | 2  | 2  | 30,325,395 | 42,585,633  | 2p23.1   | 2p21     |
| LU18_AD | 3  | 1  | 1  | 30,341,393 | 30,288,883  | 1p35.2   | 1p35.2   |
| LU18_L  | 3  | 17 | 17 | 30,345,842 | 44,373,907  | 17q11.2  | 17q21.31 |
| LU15_L  | 3  | 17 | 17 | 30,356,394 | 44,323,499  | 17q11.2  | 17q21.31 |
| LU18_AD | 3  | 5  | 5  | 30,369,649 | 30,399,434  | 5p13.3   | 5p13.3   |
| LU20_AD | 3  | 17 | 17 | 30,370,638 | 44,403,130  | 17q11.2  | 17q21.31 |
| LU21_AD | 5  | 12 | 12 | 30,377,741 | 30,412,983  | 12p11.22 | 12p11.22 |
| LU18_AD | 3  | 5  | 5  | 30,399,434 | 30,369,649  | 5p13.3   | 5p13.3   |
| LU21_AD | 5  | 12 | 12 | 30,412,983 | 30,377,741  | 12p11.22 | 12p11.22 |
| LU7_L   | 6  | 3  | 3  | 30,481,572 | 117,087,916 | 3p24.1   | 3q13.31  |
| LU5_L   | 5  | 5  | 3  | 30,483,511 | 101,418,614 | 5p13.3   | 3q12.3   |
| LU5_L   | 4  | 19 | 19 | 30,483,615 | 30,516,824  | 19q12    | 19q12    |
| LU3_L   | 4  | 5  | 3  | 30,489,984 | 101,416,488 | 5p13.3   | 3q12.3   |
| LU7_L   | 5  | 5  | 3  | 30,492,848 | 101,416,320 | 5p13.3   | 3q12.3   |



|         |     |    |    |            |             |          |          |
|---------|-----|----|----|------------|-------------|----------|----------|
| LU20_AD | 3   | 5  | 5  | 30,512,683 | 30,545,920  | 5p13.3   | 5p13.3   |
| LU5_L   | 4   | 19 | 19 | 30,516,824 | 30,483,615  | 19q12    | 19q12    |
| LU20_AD | 3   | 5  | 5  | 30,545,920 | 30,512,683  | 5p13.3   | 5p13.3   |
| LU18_AD | 3   | 7  | 15 | 30,570,704 | 79,009,524  | 7p14.3   | 15q25.1  |
| LU12_L  | 3   | 7  | 2  | 30,571,434 | 71,448,193  | 7p14.3   | 2p13.3   |
| LU20_AD | 3   | 7  | 7  | 30,576,786 | 135,948,312 | 7p14.3   | 7q33     |
| LU3_AD  | 4   | 11 | 11 | 30,600,251 | 30,632,115  | 11p14.1  | 11p14.1  |
| LU18_L  | 5   | 1  | 1  | 30,606,271 | 30,124,219  | 1p35.2   | 1p35.3   |
| LU3_AD  | 4   | 11 | 11 | 30,632,115 | 30,600,251  | 11p14.1  | 11p14.1  |
| LU20_L  | 3   | 5  | 5  | 30,636,053 | 30,666,896  | 5p13.3   | 5p13.3   |
| LU20_L  | 3   | 5  | 5  | 30,666,896 | 30,636,053  | 5p13.3   | 5p13.3   |
| LU5_L   | 3   | 1  | 1  | 30,729,153 | 31,110,646  | 1p35.2   | 1p35.2   |
| LU18_AD | 107 | 11 | 11 | 30,741,184 | 4,527,626   | 11p14.1  | 11p15.4  |
| LU18_L  | 68  | 11 | 11 | 30,744,514 | 4,525,068   | 11p14.1  | 11p15.4  |
| LU18_L  | 5   | 11 | 7  | 30,750,995 | 14,913,978  | 11p14.1  | 7p21.2   |
| LU3_AD  | 5   | 12 | 12 | 30,777,969 | 50,155,877  | 12p11.21 | 12q13.12 |
| LU3_AD  | 5   | 12 | 12 | 30,780,981 | 54,438,503  | 12p11.21 | 12q13.13 |
| LU3_L   | 3   | 19 | 19 | 30,793,459 | 30,828,845  | 19q12    | 19q12    |
| LU3_L   | 3   | 19 | 19 | 30,828,845 | 30,793,459  | 19q12    | 19q12    |
| LU14_L  | 5   | 9  | 9  | 30,843,586 | 30,878,325  | 9p21.1   | 9p21.1   |
| LU4_AD  | 3   | 7  | 17 | 30,847,188 | 48,490,167  | 7p14.3   | 17q21.33 |
| LU3_L   | 4   | 6  | 6  | 30,849,118 | 30,879,664  | 6p21.33  | 6p21.33  |
| LU3_L   | 33  | 2  | 2  | 30,850,200 | 30,807,910  | 2p23.1   | 2p23.1   |
| LU3_AD  | 21  | 2  | 2  | 30,850,337 | 30,807,978  | 2p23.1   | 2p23.1   |
| LU12_AD | 3   | 7  | 7  | 30,874,173 | 30,927,682  | 7p14.3   | 7p14.3   |
| LU14_L  | 5   | 9  | 9  | 30,878,325 | 30,843,586  | 9p21.1   | 9p21.1   |
| LU3_L   | 4   | 6  | 6  | 30,879,664 | 30,849,118  | 6p21.33  | 6p21.33  |
| LU12_AD | 3   | 7  | 7  | 30,927,682 | 30,874,173  | 7p14.3   | 7p14.3   |
| LU7_L   | 4   | 5  | 2  | 30,950,577 | 146,709,807 | 5p13.3   | 2q22.3   |
| LU12_L  | 3   | 11 | 11 | 31,037,991 | 31,073,727  | 11p13    | 11p13    |
| LU4_L   | 3   | 23 | 23 | 31,042,984 | 31,078,139  | Xp21.2   | Xp21.2   |
| LU4_AD  | 3   | 1  | 1  | 31,058,262 | 31,107,759  | 1p35.2   | 1p35.2   |
| LU12_L  | 3   | 11 | 11 | 31,073,727 | 31,037,991  | 11p13    | 11p13    |
| LU12_L  | 3   | 7  | 7  | 31,074,809 | 31,117,138  | 7p14.3   | 7p14.3   |
| LU4_L   | 3   | 23 | 23 | 31,078,139 | 31,042,984  | Xp21.2   | Xp21.2   |
| LU14_L  | 3   | 15 | 15 | 31,082,107 | 72,947,109  | 15q13.2  | 15q24.1  |
| LU4_AD  | 3   | 1  | 1  | 31,107,759 | 31,058,262  | 1p35.2   | 1p35.2   |
| LU5_L   | 3   | 1  | 1  | 31,110,646 | 30,729,153  | 1p35.2   | 1p35.2   |
| LU12_L  | 3   | 7  | 7  | 31,117,138 | 31,074,809  | 7p14.3   | 7p14.3   |
| LU5_L   | 3   | 14 | 14 | 31,141,733 | 31,178,203  | 14q12    | 14q12    |
| LU5_L   | 4   | 3  | 3  | 31,154,847 | 31,205,190  | 3p23     | 3p23     |
| LU5_L   | 3   | 14 | 14 | 31,178,203 | 31,141,733  | 14q12    | 14q12    |
| LU18_AD | 3   | 5  | 5  | 31,186,301 | 18,550,025  | 5p13.3   | 5p14.3   |
| LU20_AD | 3   | 5  | 5  | 31,188,556 | 31,237,976  | 5p13.3   | 5p13.3   |

|         |    |    |    |            |             |          |          |
|---------|----|----|----|------------|-------------|----------|----------|
| LU20_AD | 7  | 17 | 17 | 31,204,766 | 32,172,739  | 17q11.2  | 17q12    |
| LU5_L   | 4  | 3  | 3  | 31,205,190 | 31,154,847  | 3p23     | 3p23     |
| LU20_AD | 3  | 5  | 5  | 31,237,976 | 31,188,556  | 5p13.3   | 5p13.3   |
| LU14_AD | 5  | 6  | 6  | 31,239,589 | 29,854,945  | 6p21.33  | 6p22.1   |
| LU21_L  | 3  | 17 | 17 | 31,278,603 | 31,310,823  | 17q11.2  | 17q11.2  |
| LU8_L   | 3  | 11 | 11 | 31,293,118 | 31,330,137  | 11p13    | 11p13    |
| LU21_L  | 3  | 17 | 17 | 31,310,823 | 31,278,603  | 17q11.2  | 17q11.2  |
| LU11_L  | 14 | 18 | 12 | 31,316,914 | 107,450,035 | 18q12.1  | 12q23.3  |
| LU7_AD  | 3  | 6  | 5  | 31,328,983 | 79,924,384  | 6p21.33  | 5q14.1   |
| LU8_L   | 3  | 11 | 11 | 31,330,137 | 31,293,118  | 11p13    | 11p13    |
| LU5_L   | 3  | 6  | 2  | 31,331,247 | 83,087,021  | 6p21.33  | 2p12     |
| LU11_AD | 3  | 6  | 2  | 31,331,370 | 83,088,198  | 6p21.33  | 2p12     |
| LU15_AD | 7  | 9  | 9  | 31,348,870 | 33,949,603  | 9p21.1   | 9p13.3   |
| LU15_L  | 3  | 9  | 9  | 31,349,067 | 33,949,579  | 9p21.1   | 9p13.3   |
| LU20_AD | 7  | 6  | 6  | 31,380,512 | 29,783,058  | 6p21.33  | 6p22.1   |
| LU11_L  | 13 | 18 | 12 | 31,383,761 | 107,331,037 | 18q12.1  | 12q23.3  |
| LU15_L  | 7  | 9  | 9  | 31,385,771 | 2,472,867   | 9p21.1   | 9p24.2   |
| LU3_L   | 3  | 3  | 3  | 31,393,972 | 31,447,346  | 3p23     | 3p23     |
| LU18_L  | 4  | 5  | 1  | 31,394,141 | 211,515,128 | 5p13.3   | 1q32.3   |
| LU18_AD | 3  | 5  | 6  | 31,394,289 | 52,783,416  | 5p13.3   | 6p12.2   |
| LU15_L  | 3  | 9  | 9  | 31,415,806 | 41,134,127  | 9p21.1   | 9p12     |
| LU3_L   | 3  | 3  | 3  | 31,447,346 | 31,393,972  | 3p23     | 3p23     |
| LU11_L  | 3  | 18 | 12 | 31,450,616 | 56,870,937  | 18q12.1  | 12q13.3  |
| LU11_AD | 3  | 7  | 10 | 31,506,631 | 26,011,492  | 7p14.3   | 10p12.1  |
| LU16_AD | 9  | 14 | 12 | 31,560,286 | 84,394,527  | 14q12    | 12q21.31 |
| LU11_L  | 19 | 18 | 18 | 31,576,791 | 36,116,889  | 18q12.1  | 18q12.2  |
| LU11_L  | 24 | 18 | 12 | 31,585,213 | 56,561,234  | 18q12.1  | 12q13.2  |
| LU3_L   | 3  | 3  | 3  | 31,629,289 | 31,658,908  | 3p23     | 3p23     |
| LU4_AD  | 4  | 10 | 1  | 31,649,117 | 152,054,267 | 10p11.22 | 1q21.3   |
| LU3_L   | 3  | 3  | 3  | 31,658,908 | 31,629,289  | 3p23     | 3p23     |
| LU15_AD | 3  | 3  | 3  | 31,678,156 | 31,714,893  | 3p23     | 3p23     |
| LU15_AD | 3  | 3  | 3  | 31,714,893 | 31,678,156  | 3p23     | 3p23     |
| LU20_L  | 3  | 8  | 8  | 31,763,755 | 31,798,001  | 8p12     | 8p12     |
| LU6_L   | 3  | 17 | 17 | 31,774,629 | 31,805,889  | 17q11.2  | 17q12    |
| LU20_L  | 3  | 8  | 8  | 31,798,001 | 31,763,755  | 8p12     | 8p12     |
| LU6_L   | 3  | 17 | 17 | 31,805,889 | 31,774,629  | 17q12    | 17q11.2  |
| LU6_AD  | 4  | 5  | 5  | 31,808,246 | 19,275,837  | 5p13.3   | 5p14.3   |
| LU20_AD | 4  | 13 | 13 | 31,822,811 | 109,745,511 | 13q12.3  | 13q33.3  |
| LU16_AD | 3  | 17 | 17 | 31,826,440 | 31,861,176  | 17q12    | 17q12    |
| LU12_AD | 6  | 15 | 15 | 31,837,780 | 98,707,714  | 15q13.3  | 15q26.3  |
| LU21_AD | 3  | 2  | 2  | 31,854,076 | 76,106,451  | 2p23.1   | 2p12     |
| LU18_L  | 3  | 2  | 12 | 31,856,943 | 51,302,591  | 2p23.1   | 12q13.12 |
| LU16_AD | 3  | 17 | 17 | 31,861,176 | 31,826,440  | 17q12    | 17q12    |
| LU4_AD  | 3  | 16 | 5  | 31,906,485 | 56,818,072  | 16p11.2  | 5q11.2   |

|         |    |    |    |            |             |          |          |
|---------|----|----|----|------------|-------------|----------|----------|
| LU4_L   | 3  | 16 | 15 | 31,961,234 | 20,173,636  | 16p11.2  | 15q11.1  |
| LU21_AD | 3  | 16 | 15 | 31,961,967 | 20,171,322  | 16p11.2  | 15q11.1  |
| LU20_AD | 3  | 16 | 14 | 31,984,184 | 107,123,029 | 16p11.2  | 14q32.33 |
| LU3_L   | 3  | 11 | 11 | 32,037,506 | 32,079,097  | 11p13    | 11p13    |
| LU11_AD | 3  | 8  | 8  | 32,071,349 | 32,109,330  | 8p12     | 8p12     |
| LU3_L   | 3  | 11 | 11 | 32,079,097 | 32,037,506  | 11p13    | 11p13    |
| LU20_AD | 4  | 16 | 14 | 32,083,637 | 106,845,783 | 16p11.2  | 14q32.33 |
| LU11_AD | 3  | 8  | 8  | 32,109,330 | 32,071,349  | 8p12     | 8p12     |
| LU11_L  | 4  | 18 | 12 | 32,110,796 | 56,974,406  | 18q12.1  | 12q13.3  |
| LU11_L  | 7  | 18 | 12 | 32,115,502 | 56,923,347  | 18q12.1  | 12q13.3  |
| LU20_AD | 7  | 17 | 17 | 32,172,739 | 31,204,766  | 17q12    | 17q11.2  |
| LU12_AD | 3  | 14 | 13 | 32,179,818 | 24,098,231  | 14q12    | 13q12.12 |
| LU20_AD | 7  | 4  | 20 | 32,217,014 | 45,743,129  | 4p15.1   | 20q13.12 |
| LU18_AD | 3  | 14 | 14 | 32,226,942 | 32,262,533  | 14q12    | 14q12    |
| LU18_AD | 3  | 14 | 14 | 32,262,533 | 32,226,942  | 14q12    | 14q12    |
| LU20_L  | 3  | 7  | 7  | 32,314,479 | 32,344,647  | 7p14.3   | 7p14.3   |
| LU20_L  | 3  | 7  | 7  | 32,344,647 | 32,314,479  | 7p14.3   | 7p14.3   |
| LU21_L  | 4  | 15 | 15 | 32,446,238 | 32,711,403  | 15q13.3  | 15q13.3  |
| LU20_L  | 3  | 19 | 19 | 32,455,280 | 32,485,298  | 19q13.11 | 19q13.11 |
| LU3_L   | 5  | 10 | 6  | 32,480,568 | 24,976,951  | 10p11.22 | 6p22.3   |
| LU20_L  | 3  | 19 | 19 | 32,485,298 | 32,455,280  | 19q13.11 | 19q13.11 |
| LU20_L  | 5  | 4  | 4  | 32,492,110 | 39,112,384  | 4p15.1   | 4p14     |
| LU20_AD | 5  | 4  | 4  | 32,492,288 | 39,111,777  | 4p15.1   | 4p14     |
| LU3_L   | 3  | 22 | 6  | 32,507,495 | 93,044,187  | 22q12.3  | 6q15     |
| LU8_L   | 4  | 22 | 6  | 32,508,079 | 93,043,667  | 22q12.3  | 6q15     |
| LU7_L   | 3  | 6  | 6  | 32,520,438 | 17,600,615  | 6p21.32  | 6p22.3   |
| LU5_L   | 3  | 6  | 6  | 32,520,917 | 17,601,249  | 6p21.32  | 6p22.3   |
| LU6_AD  | 3  | 6  | 23 | 32,525,455 | 100,438,364 | 6p21.32  | Xq22.1   |
| LU15_AD | 3  | 22 | 22 | 32,598,527 | 23,243,056  | 22q12.3  | 22q11.22 |
| LU12_L  | 4  | 16 | 9  | 32,658,355 | 67,350,394  | 16p11.2  | 9q13     |
| LU3_L   | 3  | 15 | 15 | 32,684,306 | 72,958,888  | 15q13.3  | 15q24.1  |
| LU21_L  | 4  | 15 | 15 | 32,711,403 | 32,446,238  | 15q13.3  | 15q13.3  |
| LU8_L   | 3  | 6  | 21 | 32,845,039 | 37,261,416  | 6p21.32  | 21q22.12 |
| LU3_L   | 3  | 10 | 10 | 32,878,833 | 32,909,976  | 10p11.22 | 10p11.22 |
| LU20_AD | 3  | 17 | 17 | 32,880,536 | 32,917,867  | 17q12    | 17q12    |
| LU18_AD | 3  | 1  | 4  | 32,905,767 | 133,734,068 | 1p35.1   | 4q28.3   |
| LU3_L   | 3  | 10 | 10 | 32,909,976 | 32,878,833  | 10p11.22 | 10p11.22 |
| LU20_AD | 3  | 17 | 17 | 32,917,867 | 32,880,536  | 17q12    | 17q12    |
| LU6_L   | 5  | 16 | 2  | 32,957,986 | 38,606,030  | 16p11.2  | 2p22.1   |
| LU18_AD | 3  | 14 | 14 | 32,965,185 | 33,003,012  | 14q12    | 14q12    |
| LU11_AD | 10 | 18 | 12 | 32,981,552 | 107,570,265 | 18q12.2  | 12q23.3  |
| LU18_AD | 3  | 14 | 14 | 33,003,012 | 32,965,185  | 14q12    | 14q12    |
| LU11_AD | 21 | 18 | 18 | 33,012,245 | 36,543,063  | 18q12.2  | 18q12.2  |
| LU11_AD | 31 | 18 | 20 | 33,015,429 | 57,139,456  | 18q12.2  | 20q13.32 |

|         |    |    |    |            |             |          |          |
|---------|----|----|----|------------|-------------|----------|----------|
| LU7_AD  | 4  | 10 | 12 | 33,015,910 | 68,647,257  | 10p11.22 | 12q15    |
| LU7_L   | 7  | 10 | 12 | 33,017,277 | 68,647,011  | 10p11.22 | 12q15    |
| LU11_L  | 5  | 18 | 20 | 33,018,221 | 57,139,489  | 18q12.2  | 20q13.32 |
| LU7_AD  | 5  | 10 | 10 | 33,022,720 | 26,032,737  | 10p11.22 | 10p12.1  |
| LU12_L  | 4  | 6  | 6  | 33,038,334 | 33,077,257  | 6p21.32  | 6p21.32  |
| LU16_L  | 4  | 9  | 7  | 33,039,530 | 42,101,895  | 9p21.1   | 7p14.1   |
| LU16_L  | 3  | 16 | 1  | 33,040,450 | 242,482,656 | 16p11.2  | 1q43     |
| LU7_AD  | 5  | 6  | 6  | 33,050,588 | 33,087,933  | 6p21.32  | 6p21.32  |
| LU16_L  | 4  | 9  | 21 | 33,051,774 | 16,250,584  | 9p21.1   | 21q11.2  |
| LU4_L   | 3  | 16 | 2  | 33,068,779 | 91,663,025  | 16p11.2  | 2p11.1   |
| LU7_AD  | 4  | 10 | 12 | 33,071,432 | 69,489,333  | 10p11.22 | 12q15    |
| LU12_L  | 4  | 6  | 6  | 33,077,257 | 33,038,334  | 6p21.32  | 6p21.32  |
| LU7_AD  | 5  | 6  | 6  | 33,087,933 | 33,050,588  | 6p21.32  | 6p21.32  |
| LU18_AD | 4  | 16 | 10 | 33,095,862 | 42,627,345  | 16p11.2  | 10q11.21 |
| LU21_AD | 3  | 17 | 2  | 33,119,601 | 207,580,405 | 17q12    | 2q33.3   |
| LU16_AD | 5  | 17 | 2  | 33,120,271 | 207,579,498 | 17q12    | 2q33.3   |
| LU7_L   | 5  | 15 | 7  | 33,237,423 | 36,609,097  | 15q13.3  | 7p14.2   |
| LU20_AD | 3  | 21 | 21 | 33,309,503 | 33,348,496  | 21q22.11 | 21q22.11 |
| LU5_L   | 4  | 13 | 13 | 33,337,043 | 33,367,426  | 13q13.1  | 13q13.1  |
| LU20_AD | 3  | 21 | 21 | 33,348,496 | 33,309,503  | 21q22.11 | 21q22.11 |
| LU7_L   | 4  | 15 | 12 | 33,362,971 | 55,072,227  | 15q13.3  | 12q13.2  |
| LU7_AD  | 4  | 15 | 12 | 33,363,444 | 55,072,387  | 15q13.3  | 12q13.2  |
| LU5_L   | 4  | 13 | 13 | 33,367,426 | 33,337,043  | 13q13.1  | 13q13.1  |
| LU8_L   | 3  | 9  | 2  | 33,400,885 | 95,495,439  | 9p13.3   | 2q11.1   |
| LU8_L   | 4  | 9  | 9  | 33,401,208 | 43,105,654  | 9p13.3   | 9p12     |
| LU5_L   | 3  | 9  | 9  | 33,401,983 | 43,105,161  | 9p13.3   | 9p12     |
| LU21_L  | 3  | 16 | 18 | 33,515,639 | 14,173,303  | 16p11.2  | 18p11.21 |
| LU12_AD | 3  | 1  | 4  | 33,533,152 | 74,815,212  | 1p35.1   | 4q13.3   |
| LU15_AD | 12 | 9  | 20 | 33,537,594 | 59,512,602  | 9p13.3   | 20q13.33 |
| LU7_L   | 6  | 15 | 12 | 33,538,457 | 68,030,252  | 15q13.3  | 12q15    |
| LU15_L  | 5  | 9  | 20 | 33,538,952 | 59,515,182  | 9p13.3   | 20q13.33 |
| LU21_L  | 4  | 16 | 14 | 33,591,730 | 106,526,778 | 16p11.2  | 14q32.33 |
| LU8_L   | 3  | 21 | 21 | 33,594,672 | 33,625,090  | 21q22.11 | 21q22.11 |
| LU18_L  | 4  | 16 | 14 | 33,598,487 | 106,521,894 | 16p11.2  | 14q32.33 |
| LU11_AD | 3  | 18 | 12 | 33,601,441 | 58,507,327  | 18q12.2  | 12q14.1  |
| LU8_L   | 3  | 21 | 21 | 33,625,090 | 33,594,672  | 21q22.11 | 21q22.11 |
| LU6_L   | 3  | 16 | 2  | 33,682,155 | 30,073,293  | 16p11.2  | 2p23.1   |
| LU6_L   | 5  | 16 | 2  | 33,687,989 | 42,552,203  | 16p11.2  | 2p21     |
| LU6_AD  | 3  | 16 | 2  | 33,688,719 | 42,551,595  | 16p11.2  | 2p21     |
| LU11_AD | 18 | 18 | 12 | 33,700,767 | 48,892,820  | 18q12.2  | 12q13.11 |
| LU4_AD  | 6  | 7  | 7  | 33,705,262 | 14,067,271  | 7p14.3   | 7p21.2   |
| LU4_AD  | 3  | 9  | 9  | 33,738,639 | 33,773,427  | 9p13.3   | 9p13.3   |
| LU4_AD  | 3  | 9  | 9  | 33,773,427 | 33,738,639  | 9p13.3   | 9p13.3   |
| LU20_AD | 3  | 16 | 10 | 33,804,107 | 39,031,385  | 16p11.2  | 10p11.1  |

|         |    |    |    |            |             |          |          |
|---------|----|----|----|------------|-------------|----------|----------|
| LU5_AD  | 4  | 6  | 6  | 33,804,294 | 33,834,690  | 6p21.31  | 6p21.31  |
| LU12_L  | 3  | 16 | 10 | 33,804,661 | 39,030,861  | 16p11.2  | 10p11.1  |
| LU7_L   | 4  | 16 | 10 | 33,805,844 | 39,029,739  | 16p11.2  | 10p11.1  |
| LU12_L  | 3  | 17 | 7  | 33,831,602 | 24,831,151  | 17q12    | 7p15.3   |
| LU5_AD  | 4  | 6  | 6  | 33,834,690 | 33,804,294  | 6p21.31  | 6p21.31  |
| LU20_AD | 3  | 2  | 1  | 33,883,635 | 119,724,618 | 2p22.3   | 1p12     |
| LU18_AD | 3  | 2  | 7  | 33,888,825 | 40,204,436  | 2p22.3   | 7p14.1   |
| LU3_L   | 3  | 8  | 7  | 33,938,198 | 41,596,156  | 8p12     | 7p14.1   |
| LU15_L  | 3  | 9  | 9  | 33,949,579 | 31,349,067  | 9p13.3   | 9p21.1   |
| LU15_AD | 7  | 9  | 9  | 33,949,603 | 31,348,870  | 9p13.3   | 9p21.1   |
| LU14_L  | 3  | 22 | 22 | 33,970,176 | 37,966,793  | 22q12.3  | 22q13.1  |
| LU18_L  | 3  | 8  | 8  | 33,970,513 | 34,035,548  | 8p12     | 8p12     |
| LU11_AD | 6  | 4  | 4  | 33,978,685 | 11,682,470  | 4p15.1   | 4p15.33  |
| LU14_L  | 4  | 4  | 4  | 34,031,003 | 35,451,931  | 4p15.1   | 4p15.1   |
| LU18_L  | 3  | 8  | 8  | 34,035,548 | 33,970,513  | 8p12     | 8p12     |
| LU18_L  | 7  | 5  | 7  | 34,104,200 | 22,831,123  | 5p13.2   | 7p15.3   |
| LU18_L  | 5  | 5  | 5  | 34,104,209 | 16,148,849  | 5p13.2   | 5p15.1   |
| LU20_AD | 4  | 2  | 21 | 34,142,498 | 10,137,939  | 2p22.3   | 21p11.2  |
| LU14_L  | 4  | 17 | 17 | 34,181,761 | 34,211,580  | 17q12    | 17q12    |
| LU16_L  | 3  | 5  | 7  | 34,182,840 | 63,573,378  | 5p13.2   | 7q11.21  |
| LU14_L  | 7  | 4  | 4  | 34,210,419 | 34,339,335  | 4p15.1   | 4p15.1   |
| LU14_L  | 4  | 17 | 17 | 34,211,580 | 34,181,761  | 17q12    | 17q12    |
| LU14_AD | 7  | 4  | 4  | 34,220,385 | 34,338,589  | 4p15.1   | 4p15.1   |
| LU21_L  | 3  | 12 | 24 | 34,274,985 | 19,592,136  | 12p11.1  | Yq11.221 |
| LU3_L   | 3  | 18 | 18 | 34,298,809 | 34,333,866  | 18q12.2  | 18q12.2  |
| LU4_AD  | 3  | 16 | 3  | 34,299,724 | 20,656,361  | 16p11.2  | 3p24.3   |
| LU4_AD  | 3  | 16 | 23 | 34,305,378 | 72,536,844  | 16p11.2  | Xq13.2   |
| LU20_AD | 3  | 12 | 18 | 34,315,131 | 46,338      | 12p11.1  | 18p11.32 |
| LU3_L   | 3  | 18 | 18 | 34,333,866 | 34,298,809  | 18q12.2  | 18q12.2  |
| LU14_AD | 7  | 4  | 4  | 34,338,589 | 34,220,385  | 4p15.1   | 4p15.1   |
| LU14_L  | 7  | 4  | 4  | 34,339,335 | 34,210,419  | 4p15.1   | 4p15.1   |
| LU7_L   | 10 | 7  | 12 | 34,370,860 | 66,300,361  | 7p14.3   | 12q14.3  |
| LU7_AD  | 7  | 7  | 12 | 34,372,186 | 66,299,816  | 7p14.3   | 12q14.3  |
| LU16_AD | 7  | 7  | 9  | 34,385,475 | 68,810,722  | 7p14.3   | 9q21.11  |
| LU16_AD | 6  | 7  | 9  | 34,386,000 | 69,146,868  | 7p14.3   | 9q21.11  |
| LU18_AD | 9  | 5  | 5  | 34,405,474 | 20,014,590  | 5p13.2   | 5p14.3   |
| LU18_L  | 12 | 5  | 5  | 34,405,611 | 20,014,904  | 5p13.2   | 5p14.3   |
| LU4_AD  | 13 | 16 | 16 | 34,419,833 | 62,073,284  | 16p11.2  | 16q21    |
| LU7_AD  | 5  | 17 | 17 | 34,437,104 | 34,600,013  | 17q12    | 17q12    |
| LU3_L   | 3  | 17 | 17 | 34,437,608 | 34,600,021  | 17q12    | 17q12    |
| LU21_L  | 3  | 20 | 18 | 34,447,733 | 11,442,744  | 20q11.23 | 18p11.21 |
| LU15_L  | 20 | 9  | 20 | 34,462,557 | 56,058,516  | 9p13.3   | 20q13.31 |
| LU12_L  | 16 | 8  | 8  | 34,463,372 | 131,561,282 | 8p12     | 8q24.22  |
| LU15_AD | 15 | 9  | 20 | 34,466,309 | 56,055,511  | 9p13.3   | 20q13.31 |

|         |    |    |    |            |             |          |          |
|---------|----|----|----|------------|-------------|----------|----------|
| LU14_L  | 4  | 18 | 18 | 34,495,349 | 34,527,484  | 18q12.2  | 18q12.2  |
| LU16_AD | 8  | 7  | 7  | 34,495,874 | 16,648,775  | 7p14.3   | 7p21.1   |
| LU7_AD  | 3  | 15 | 12 | 34,499,974 | 71,404,475  | 15q14    | 12q15    |
| LU14_L  | 4  | 18 | 18 | 34,527,484 | 34,495,349  | 18q12.2  | 18q12.2  |
| LU21_AD | 3  | 17 | 6  | 34,545,738 | 141,013,022 | 17q12    | 6q24.1   |
| LU16_AD | 17 | 7  | 9  | 34,546,308 | 12,202,921  | 7p14.3   | 9p23     |
| LU16_AD | 3  | 3  | 3  | 34,565,177 | 17,813,035  | 3p22.3   | 3p24.3   |
| LU7_L   | 4  | 15 | 7  | 34,569,858 | 23,174,221  | 15q14    | 7p15.3   |
| LU7_AD  | 5  | 17 | 17 | 34,600,013 | 34,437,104  | 17q12    | 17q12    |
| LU3_L   | 3  | 17 | 17 | 34,600,021 | 34,437,608  | 17q12    | 17q12    |
| LU4_AD  | 4  | 9  | 1  | 34,668,662 | 202,834,284 | 9p13.3   | 1q32.1   |
| LU4_AD  | 3  | 15 | 15 | 34,683,737 | 23,601,241  | 15q14    | 15q11.2  |
| LU3_L   | 3  | 14 | 14 | 34,722,826 | 34,759,272  | 14q13.1  | 14q13.1  |
| LU18_AD | 3  | 7  | 7  | 34,727,674 | 34,764,492  | 7p14.3   | 7p14.3   |
| LU4_AD  | 4  | 23 | 23 | 34,758,053 | 36,950,201  | Xp21.1   | Xp21.1   |
| LU3_L   | 3  | 14 | 14 | 34,759,272 | 34,722,826  | 14q13.1  | 14q13.1  |
| LU4_L   | 4  | 19 | 10 | 34,760,361 | 43,171,719  | 19q13.11 | 10q11.21 |
| LU4_AD  | 14 | 19 | 10 | 34,761,401 | 43,170,182  | 19q13.11 | 10q11.21 |
| LU18_AD | 3  | 7  | 7  | 34,764,492 | 34,727,674  | 7p14.3   | 7p14.3   |
| LU4_AD  | 10 | 7  | 23 | 34,775,379 | 3,089,196   | 7p14.3   | Xp22.33  |
| LU20_AD | 4  | 5  | 1  | 34,783,039 | 16,430,454  | 5p13.2   | 1p36.13  |
| LU8_L   | 3  | 5  | 10 | 34,785,232 | 44,082,941  | 5p13.2   | 10q11.21 |
| LU4_AD  | 3  | 11 | 11 | 34,826,404 | 34,872,182  | 11p13    | 11p13    |
| LU7_L   | 3  | 12 | 4  | 34,832,304 | 190,816,730 | 12p11.1  | 4q35.2   |
| LU6_L   | 9  | 21 | 13 | 34,832,936 | 38,935,120  | 21q22.11 | 13q13.3  |
| LU4_AD  | 3  | 11 | 11 | 34,872,182 | 34,826,404  | 11p13    | 11p13    |
| LU6_AD  | 4  | 22 | 20 | 34,915,045 | 16,925,574  | 22q12.3  | 20p12.1  |
| LU6_L   | 10 | 22 | 20 | 34,916,813 | 16,923,567  | 22q12.3  | 20p12.1  |
| LU20_AD | 4  | 9  | 9  | 34,937,867 | 75,454,727  | 9p13.3   | 9q21.13  |
| LU15_L  | 5  | 9  | 20 | 34,965,996 | 60,520,408  | 9p13.3   | 20q13.33 |
| LU15_AD | 12 | 9  | 20 | 34,967,382 | 60,517,764  | 9p13.3   | 20q13.33 |
| LU12_AD | 4  | 22 | 22 | 34,988,007 | 40,723,999  | 22q12.3  | 22q13.1  |
| LU18_AD | 4  | 19 | 11 | 35,005,857 | 83,131,151  | 19q13.11 | 11q14.1  |
| LU4_AD  | 5  | 23 | 23 | 35,043,779 | 36,806,043  | Xp21.1   | Xp21.1   |
| LU4_AD  | 3  | 19 | 7  | 35,114,754 | 149,222,061 | 19q13.11 | 7q36.1   |
| LU20_AD | 3  | 5  | 5  | 35,117,933 | 35,148,332  | 5p13.2   | 5p13.2   |
| LU12_AD | 3  | 4  | 4  | 35,145,340 | 100,408,442 | 4p15.1   | 4q23     |
| LU11_AD | 7  | 7  | 12 | 35,147,438 | 83,847,797  | 7p14.2   | 12q21.31 |
| LU20_AD | 3  | 5  | 5  | 35,148,332 | 35,117,933  | 5p13.2   | 5p13.2   |
| LU18_AD | 15 | 7  | 12 | 35,170,368 | 72,600,535  | 7p14.2   | 12q21.1  |
| LU18_L  | 20 | 7  | 12 | 35,171,136 | 72,599,414  | 7p14.2   | 12q21.1  |
| LU3_AD  | 3  | 4  | 4  | 35,180,797 | 35,233,430  | 4p15.1   | 4p15.1   |
| LU4_AD  | 3  | 7  | 7  | 35,207,070 | 35,238,620  | 7p14.2   | 7p14.2   |
| LU3_AD  | 3  | 4  | 4  | 35,233,430 | 35,180,797  | 4p15.1   | 4p15.1   |

|         |    |    |    |            |             |          |          |
|---------|----|----|----|------------|-------------|----------|----------|
| LU4_AD  | 3  | 7  | 7  | 35,238,620 | 35,207,070  | 7p14.2   | 7p14.2   |
| LU3_AD  | 3  | 23 | 23 | 35,245,051 | 35,278,709  | Xp21.1   | Xp21.1   |
| LU18_AD | 3  | 15 | 15 | 35,245,119 | 37,248,277  | 15q14    | 15q14    |
| LU20_AD | 3  | 22 | 22 | 35,268,160 | 35,299,810  | 22q12.3  | 22q12.3  |
| LU4_L   | 3  | 7  | 7  | 35,271,786 | 35,304,176  | 7p14.2   | 7p14.2   |
| LU3_AD  | 3  | 23 | 23 | 35,278,709 | 35,245,051  | Xp21.1   | Xp21.1   |
| LU15_AD | 8  | 20 | 20 | 35,284,537 | 46,863,426  | 20q11.23 | 20q13.13 |
| LU15_L  | 3  | 20 | 20 | 35,286,962 | 46,860,769  | 20q11.23 | 20q13.13 |
| LU20_AD | 3  | 22 | 22 | 35,299,810 | 35,268,160  | 22q12.3  | 22q12.3  |
| LU4_L   | 3  | 7  | 7  | 35,304,176 | 35,271,786  | 7p14.2   | 7p14.2   |
| LU21_L  | 3  | 9  | 9  | 35,318,169 | 35,354,986  | 9p13.3   | 9p13.3   |
| LU14_AD | 3  | 13 | 5  | 35,320,850 | 93,683,125  | 13q13.2  | 5q15     |
| LU21_L  | 3  | 9  | 9  | 35,354,986 | 35,318,169  | 9p13.3   | 9p13.3   |
| LU7_L   | 5  | 7  | 7  | 35,359,052 | 26,950,564  | 7p14.2   | 7p15.2   |
| LU7_AD  | 11 | 21 | 12 | 35,373,684 | 55,885,875  | 21q22.11 | 12q13.2  |
| LU7_L   | 14 | 21 | 12 | 35,374,359 | 55,885,591  | 21q22.11 | 12q13.2  |
| LU7_L   | 6  | 21 | 12 | 35,385,655 | 67,293,668  | 21q22.11 | 12q14.3  |
| LU14_L  | 4  | 4  | 4  | 35,451,931 | 34,031,003  | 4p15.1   | 4p15.1   |
| LU7_AD  | 3  | 9  | 1  | 35,453,431 | 91,673,855  | 9p13.3   | 1p22.2   |
| LU8_L   | 3  | 9  | 7  | 35,460,836 | 89,257,340  | 9p13.3   | 7q21.13  |
| LU18_L  | 3  | 4  | 4  | 35,493,971 | 35,538,875  | 4p15.1   | 4p15.1   |
| LU18_L  | 3  | 4  | 4  | 35,538,875 | 35,493,971  | 4p15.1   | 4p15.1   |
| LU4_AD  | 5  | 19 | 5  | 35,541,456 | 155,447,766 | 19q13.12 | 5q33.2   |
| LU20_AD | 3  | 20 | 20 | 35,567,962 | 21,066,047  | 20q11.23 | 20p11.23 |
| LU12_AD | 3  | 13 | 13 | 35,599,954 | 35,639,393  | 13q13.3  | 13q13.3  |
| LU12_AD | 10 | 20 | 1  | 35,628,396 | 12,473,414  | 20q11.23 | 1p36.22  |
| LU12_AD | 3  | 13 | 13 | 35,639,393 | 35,599,954  | 13q13.3  | 13q13.3  |
| LU7_AD  | 4  | 7  | 12 | 35,651,175 | 69,516,627  | 7p14.2   | 12q15    |
| LU4_AD  | 10 | 7  | 7  | 35,675,781 | 12,565,500  | 7p14.2   | 7p21.3   |
| LU21_AD | 7  | 5  | 5  | 35,694,885 | 35,946,070  | 5p13.2   | 5p13.2   |
| LU3_AD  | 3  | 3  | 3  | 35,797,347 | 35,827,405  | 3p22.3   | 3p22.3   |
| LU4_L   | 3  | 8  | 1  | 35,817,778 | 105,005,801 | 8p12     | 1p21.1   |
| LU11_AD | 9  | 18 | 12 | 35,819,336 | 56,409,767  | 18q12.2  | 12q13.2  |
| LU11_L  | 13 | 18 | 12 | 35,820,046 | 56,404,650  | 18q12.2  | 12q13.2  |
| LU11_L  | 7  | 18 | 12 | 35,821,655 | 48,709,623  | 18q12.2  | 12q13.11 |
| LU11_L  | 6  | 18 | 12 | 35,821,721 | 68,839,118  | 18q12.2  | 12q15    |
| LU11_AD | 12 | 18 | 12 | 35,823,309 | 68,838,292  | 18q12.2  | 12q15    |
| LU3_AD  | 3  | 3  | 3  | 35,827,405 | 35,797,347  | 3p22.3   | 3p22.3   |
| LU11_AD | 17 | 18 | 12 | 35,828,399 | 57,621,982  | 18q12.2  | 12q13.3  |
| LU11_L  | 16 | 18 | 12 | 35,829,238 | 57,622,125  | 18q12.2  | 12q13.3  |
| LU6_AD  | 3  | 2  | 2  | 35,859,732 | 28,465,380  | 2p22.3   | 2p23.2   |
| LU6_L   | 5  | 2  | 2  | 35,860,727 | 28,464,016  | 2p22.3   | 2p23.2   |
| LU21_L  | 9  | 5  | 5  | 35,867,430 | 52,062,954  | 5p13.2   | 5q11.2   |
| LU11_L  | 4  | 18 | 12 | 35,884,870 | 62,586,101  | 18q12.2  | 12q14.1  |

|         |    |    |    |            |             |          |          |
|---------|----|----|----|------------|-------------|----------|----------|
| LU21_AD | 6  | 7  | 7  | 35,913,697 | 4,640,434   | 7p14.2   | 7p22.1   |
| LU21_AD | 7  | 5  | 5  | 35,946,070 | 35,694,885  | 5p13.2   | 5p13.2   |
| LU18_L  | 4  | 15 | 11 | 35,949,191 | 42,749,851  | 15q14    | 11p12    |
| LU18_AD | 5  | 15 | 11 | 35,949,938 | 42,749,723  | 15q14    | 11p12    |
| LU7_L   | 3  | 15 | 7  | 35,950,971 | 19,637,210  | 15q14    | 7p21.1   |
| LU8_L   | 3  | 20 | 20 | 35,955,607 | 35,986,518  | 20q11.23 | 20q11.23 |
| LU11_L  | 3  | 18 | 8  | 35,959,837 | 59,264,818  | 18q12.2  | 8q12.1   |
| LU8_L   | 3  | 20 | 20 | 35,986,518 | 35,955,607  | 20q11.23 | 20q11.23 |
| LU7_AD  | 3  | 5  | 18 | 35,994,435 | 77,751,586  | 5p13.2   | 18q23    |
| LU7_L   | 5  | 15 | 7  | 36,002,557 | 22,738,600  | 15q14    | 7p15.3   |
| LU21_AD | 3  | 2  | 4  | 36,013,707 | 84,885,154  | 2p22.3   | 4q21.23  |
| LU21_L  | 6  | 20 | 18 | 36,019,402 | 11,457,327  | 20q11.23 | 18p11.21 |
| LU11_L  | 6  | 18 | 12 | 36,025,545 | 58,200,101  | 18q12.2  | 12q14.1  |
| LU14_L  | 3  | 3  | 3  | 36,068,877 | 36,100,228  | 3p22.3   | 3p22.3   |
| LU14_L  | 3  | 3  | 3  | 36,100,228 | 36,068,877  | 3p22.3   | 3p22.3   |
| LU11_L  | 19 | 18 | 18 | 36,116,889 | 31,576,791  | 18q12.2  | 18q12.1  |
| LU11_L  | 64 | 18 | 12 | 36,140,408 | 62,580,465  | 18q12.2  | 12q14.1  |
| LU11_AD | 35 | 18 | 12 | 36,142,124 | 62,580,187  | 18q12.2  | 12q14.1  |
| LU20_L  | 3  | 21 | 21 | 36,181,293 | 36,212,918  | 21q22.12 | 21q22.12 |
| LU8_L   | 3  | 2  | 2  | 36,190,917 | 36,241,983  | 2p22.3   | 2p22.3   |
| LU20_L  | 3  | 21 | 21 | 36,212,918 | 36,181,293  | 21q22.12 | 21q22.12 |
| LU8_L   | 3  | 2  | 2  | 36,241,983 | 36,190,917  | 2p22.3   | 2p22.3   |
| LU4_L   | 5  | 10 | 10 | 36,245,384 | 36,275,314  | 10p11.21 | 10p11.21 |
| LU12_L  | 12 | 8  | 8  | 36,250,754 | 65,781,082  | 8p12     | 8q12.3   |
| LU7_L   | 4  | 7  | 12 | 36,271,666 | 51,156,187  | 7p14.2   | 12q13.12 |
| LU4_L   | 5  | 10 | 10 | 36,275,314 | 36,245,384  | 10p11.21 | 10p11.21 |
| LU21_AD | 4  | 20 | 12 | 36,394,284 | 110,540,948 | 20q11.23 | 12q24.11 |
| LU7_L   | 3  | 21 | 21 | 36,506,148 | 36,538,762  | 21q22.12 | 21q22.12 |
| LU18_AD | 3  | 3  | 14 | 36,506,415 | 97,660,380  | 3p22.2   | 14q32.2  |
| LU5_AD  | 5  | 3  | 3  | 36,508,025 | 36,539,181  | 3p22.2   | 3p22.2   |
| LU15_AD | 15 | 20 | 20 | 36,515,040 | 44,813,783  | 20q11.23 | 20q13.12 |
| LU15_L  | 8  | 20 | 20 | 36,515,507 | 44,813,353  | 20q11.23 | 20q13.12 |
| LU8_L   | 3  | 10 | 10 | 36,526,483 | 36,557,349  | 10p11.21 | 10p11.21 |
| LU18_AD | 28 | 15 | 5  | 36,530,107 | 28,602,571  | 15q14    | 5p14.1   |
| LU18_L  | 10 | 15 | 5  | 36,530,619 | 28,604,673  | 15q14    | 5p14.1   |
| LU18_L  | 6  | 15 | 5  | 36,531,529 | 28,602,245  | 15q14    | 5p14.1   |
| LU7_L   | 3  | 21 | 21 | 36,538,762 | 36,506,148  | 21q22.12 | 21q22.12 |
| LU5_AD  | 5  | 3  | 3  | 36,539,181 | 36,508,025  | 3p22.2   | 3p22.2   |
| LU11_AD | 28 | 18 | 20 | 36,542,992 | 57,110,212  | 18q12.2  | 20q13.32 |
| LU11_AD | 21 | 18 | 18 | 36,543,063 | 33,012,245  | 18q12.2  | 18q12.2  |
| LU15_AD | 31 | 20 | 20 | 36,550,062 | 47,734,878  | 20q11.23 | 20q13.13 |
| LU15_L  | 12 | 20 | 20 | 36,554,906 | 47,734,708  | 20q11.23 | 20q13.13 |
| LU11_AD | 9  | 18 | 12 | 36,557,080 | 115,609,764 | 18q12.2  | 12q24.21 |
| LU8_L   | 3  | 10 | 10 | 36,557,349 | 36,526,483  | 10p11.21 | 10p11.21 |



|         |    |    |    |            |            |          |          |
|---------|----|----|----|------------|------------|----------|----------|
| LU11_AD | 13 | 18 | 12 | 36,557,635 | 48,674,803 | 18q12.2  | 12q13.11 |
| LU11_AD | 26 | 18 | 12 | 36,578,560 | 83,356,733 | 18q12.2  | 12q21.31 |
| LU18_L  | 6  | 15 | 5  | 36,606,985 | 28,470,095 | 15q14    | 5p14.1   |
| LU18_AD | 6  | 15 | 5  | 36,607,028 | 28,469,651 | 15q14    | 5p14.1   |
| LU7_L   | 5  | 7  | 15 | 36,609,097 | 33,237,423 | 7p14.2   | 15q13.3  |
| LU16_AD | 16 | 14 | 14 | 36,636,603 | 36,792,148 | 14q13.3  | 14q13.3  |
| LU12_L  | 21 | 8  | 8  | 36,652,097 | 24,913,947 | 8p11.23  | 8p21.2   |
| LU20_L  | 3  | 20 | 20 | 36,766,058 | 36,800,390 | 20q11.23 | 20q11.23 |
| LU4_L   | 3  | 23 | 23 | 36,788,225 | 36,818,826 | Xp21.1   | Xp21.1   |
| LU16_AD | 16 | 14 | 14 | 36,792,148 | 36,636,603 | 14q13.3  | 14q13.3  |
| LU20_L  | 3  | 20 | 20 | 36,800,390 | 36,766,058 | 20q11.23 | 20q11.23 |
| LU4_AD  | 5  | 23 | 23 | 36,806,043 | 35,043,779 | Xp21.1   | Xp21.1   |
| LU18_L  | 5  | 15 | 21 | 36,813,266 | 24,350,105 | 15q14    | 21q21.2  |
| LU18_AD | 6  | 15 | 21 | 36,813,514 | 24,350,131 | 15q14    | 21q21.2  |
| LU4_L   | 3  | 23 | 23 | 36,818,826 | 36,788,225 | Xp21.1   | Xp21.1   |
| LU20_L  | 3  | 20 | 20 | 36,828,648 | 36,860,559 | 20q11.23 | 20q11.23 |
| LU20_L  | 3  | 20 | 20 | 36,860,559 | 36,828,648 | 20q11.23 | 20q11.23 |
| LU12_L  | 3  | 4  | 5  | 36,905,102 | 64,470,471 | 4p14     | 5q12.3   |
| LU20_AD | 3  | 15 | 19 | 36,906,516 | 42,011,818 | 15q14    | 19q13.2  |
| LU21_L  | 4  | 5  | 5  | 36,944,540 | 41,315,610 | 5p13.2   | 5p13.1   |
| LU4_AD  | 4  | 23 | 23 | 36,950,201 | 34,758,053 | Xp21.1   | Xp21.1   |
| LU5_L   | 3  | 14 | 14 | 36,966,145 | 36,996,618 | 14q13.3  | 14q13.3  |
| LU21_L  | 3  | 4  | 4  | 36,982,668 | 37,015,459 | 4p14     | 4p14     |
| LU5_L   | 3  | 14 | 14 | 36,996,618 | 36,966,145 | 14q13.3  | 14q13.3  |
| LU12_L  | 3  | 7  | 7  | 37,009,317 | 37,040,202 | 7p14.2   | 7p14.2   |
| LU21_L  | 3  | 4  | 4  | 37,015,459 | 36,982,668 | 4p14     | 4p14     |
| LU12_L  | 3  | 7  | 7  | 37,040,202 | 37,009,317 | 7p14.2   | 7p14.2   |
| LU21_L  | 5  | 5  | 5  | 37,089,043 | 54,610,230 | 5p13.2   | 5q11.2   |
| LU12_AD | 3  | 7  | 7  | 37,094,646 | 37,133,912 | 7p14.2   | 7p14.2   |
| LU12_AD | 3  | 7  | 7  | 37,133,912 | 37,094,646 | 7p14.2   | 7p14.2   |
| LU16_AD | 3  | 7  | 23 | 37,174,966 | 8,254,909  | 7p14.2   | Xp22.31  |
| LU14_AD | 3  | 14 | 22 | 37,178,529 | 28,869,676 | 14q13.3  | 22q12.1  |
| LU18_L  | 4  | 15 | 5  | 37,179,914 | 874,833    | 15q14    | 5p15.33  |
| LU18_AD | 6  | 15 | 5  | 37,181,252 | 873,571    | 15q14    | 5p15.33  |
| LU7_AD  | 5  | 15 | 12 | 37,181,377 | 68,449,114 | 15q14    | 12q15    |
| LU7_L   | 6  | 7  | 7  | 37,209,780 | 48,707,134 | 7p14.1   | 7p12.3   |
| LU7_AD  | 5  | 7  | 12 | 37,217,449 | 65,651,718 | 7p14.1   | 12q14.3  |
| LU7_L   | 4  | 7  | 12 | 37,219,541 | 65,653,321 | 7p14.1   | 12q14.3  |
| LU7_AD  | 4  | 7  | 12 | 37,230,977 | 55,224,414 | 7p14.1   | 12q13.2  |
| LU7_L   | 12 | 7  | 12 | 37,231,370 | 55,226,604 | 7p14.1   | 12q13.2  |
| LU18_L  | 24 | 15 | 5  | 37,236,463 | 777,043    | 15q14    | 5p15.33  |
| LU18_AD | 29 | 15 | 5  | 37,240,871 | 773,034    | 15q14    | 5p15.33  |
| LU16_AD | 35 | 7  | 7  | 37,241,362 | 12,237,314 | 7p14.1   | 7p21.3   |
| LU18_AD | 3  | 15 | 15 | 37,248,277 | 35,245,119 | 15q14    | 15q14    |

|         |    |    |    |            |             |          |          |
|---------|----|----|----|------------|-------------|----------|----------|
| LU3_L   | 4  | 6  | 6  | 37,249,628 | 37,281,758  | 6p21.2   | 6p21.2   |
| LU8_L   | 3  | 21 | 6  | 37,261,416 | 32,845,039  | 21q22.12 | 6p21.32  |
| LU3_L   | 4  | 6  | 6  | 37,281,758 | 37,249,628  | 6p21.2   | 6p21.2   |
| LU7_AD  | 3  | 7  | 7  | 37,335,736 | 37,591,820  | 7p14.1   | 7p14.1   |
| LU7_L   | 6  | 7  | 7  | 37,341,357 | 181,319     | 7p14.1   | 7p22.3   |
| LU20_AD | 4  | 8  | 12 | 37,367,076 | 45,206,082  | 8p11.23  | 12q12    |
| LU21_AD | 3  | 18 | 18 | 37,393,525 | 37,434,264  | 18q12.3  | 18q12.3  |
| LU16_AD | 21 | 8  | 1  | 37,433,898 | 106,719,090 | 8p11.23  | 1p21.1   |
| LU21_AD | 3  | 18 | 18 | 37,434,264 | 37,393,525  | 18q12.3  | 18q12.3  |
| LU16_L  | 21 | 8  | 1  | 37,434,501 | 106,718,757 | 8p11.23  | 1p21.1   |
| LU3_L   | 3  | 5  | 23 | 37,504,332 | 104,650,950 | 5p13.2   | Xq22.3   |
| LU16_AD | 3  | 5  | 11 | 37,504,834 | 112,055,414 | 5p13.2   | 11q23.1  |
| LU7_L   | 4  | 5  | 11 | 37,505,772 | 112,053,491 | 5p13.2   | 11q23.1  |
| LU7_L   | 7  | 7  | 7  | 37,558,684 | 21,052,052  | 7p14.1   | 7p15.3   |
| LU21_L  | 3  | 10 | 24 | 37,564,937 | 16,008,622  | 10p11.21 | Yq11.221 |
| LU20_L  | 3  | 10 | 4  | 37,567,962 | 64,052,718  | 10p11.21 | 4q13.1   |
| LU20_L  | 5  | 10 | 23 | 37,569,382 | 104,131,202 | 10p11.21 | Xq22.3   |
| LU12_AD | 3  | 5  | 20 | 37,574,850 | 3,420,813   | 5p13.2   | 20p13    |
| LU12_L  | 4  | 5  | 20 | 37,574,926 | 3,420,905   | 5p13.2   | 20p13    |
| LU14_L  | 4  | 22 | 22 | 37,575,249 | 40,231,161  | 22q12.3  | 22q13.1  |
| LU7_AD  | 3  | 7  | 7  | 37,591,820 | 37,335,736  | 7p14.1   | 7p14.1   |
| LU21_AD | 7  | 7  | 7  | 37,705,388 | 40,098,389  | 7p14.1   | 7p14.1   |
| LU4_AD  | 5  | 1  | 1  | 37,729,199 | 37,761,426  | 1p34.3   | 1p34.3   |
| LU11_L  | 11 | 8  | 8  | 37,748,224 | 58,972,249  | 8p11.23  | 8q12.1   |
| LU4_AD  | 5  | 1  | 1  | 37,761,426 | 37,729,199  | 1p34.3   | 1p34.3   |
| LU21_L  | 4  | 5  | 12 | 37,777,834 | 50,127,924  | 5p13.2   | 12q13.12 |
| LU20_AD | 4  | 5  | 5  | 37,780,614 | 64,473,535  | 5p13.2   | 5q12.3   |
| LU4_AD  | 5  | 5  | 5  | 37,782,454 | 64,468,413  | 5p13.2   | 5q12.3   |
| LU5_L   | 4  | 5  | 5  | 37,785,399 | 64,473,540  | 5p13.2   | 5q12.3   |
| LU20_AD | 3  | 5  | 5  | 37,817,593 | 37,854,331  | 5p13.2   | 5p13.2   |
| LU18_AD | 4  | 7  | 12 | 37,828,557 | 71,337,436  | 7p14.1   | 12q15    |
| LU20_AD | 3  | 5  | 5  | 37,854,331 | 37,817,593  | 5p13.2   | 5p13.2   |
| LU14_L  | 3  | 22 | 22 | 37,966,793 | 33,970,176  | 22q13.1  | 22q12.3  |
| LU20_L  | 3  | 5  | 5  | 38,021,491 | 38,056,361  | 5p13.2   | 5p13.2   |
| LU4_L   | 4  | 10 | 15 | 38,038,838 | 21,196,796  | 10p11.1  | 15q11.2  |
| LU4_AD  | 6  | 10 | 15 | 38,039,163 | 21,195,865  | 10p11.1  | 15q11.2  |
| LU20_L  | 3  | 5  | 5  | 38,056,361 | 38,021,491  | 5p13.2   | 5p13.2   |
| LU7_AD  | 5  | 7  | 12 | 38,099,573 | 61,930,214  | 7p14.1   | 12q14.1  |
| LU7_L   | 4  | 7  | 12 | 38,100,591 | 61,929,028  | 7p14.1   | 12q14.1  |
| LU16_AD | 3  | 13 | 14 | 38,133,246 | 46,182,627  | 13q13.3  | 14q21.2  |
| LU4_AD  | 3  | 19 | 19 | 38,195,944 | 38,229,926  | 19q13.12 | 19q13.12 |
| LU4_AD  | 6  | 10 | 9  | 38,220,139 | 140,399,599 | 10p11.1  | 9q34.3   |
| LU4_AD  | 3  | 19 | 19 | 38,229,926 | 38,195,944  | 19q13.12 | 19q13.12 |
| LU4_AD  | 6  | 10 | 1  | 38,238,901 | 209,856,792 | 10p11.1  | 1q32.2   |

|         |    |    |    |            |             |         |          |
|---------|----|----|----|------------|-------------|---------|----------|
| LU4_AD  | 3  | 9  | 10 | 38,241,137 | 101,600,012 | 9p13.2  | 10q24.2  |
| LU4_AD  | 11 | 10 | 1  | 38,243,735 | 153,052,855 | 10p11.1 | 1q21.3   |
| LU18_L  | 8  | 4  | 8  | 38,245,177 | 142,548,699 | 4p14    | 8q24.3   |
| LU11_AD | 4  | 3  | 6  | 38,335,750 | 106,678,590 | 3p22.2  | 6q21     |
| LU7_AD  | 3  | 3  | 3  | 38,338,362 | 48,372,957  | 3p22.2  | 3p21.31  |
| LU3_L   | 3  | 3  | 12 | 38,339,517 | 124,035,534 | 3p22.2  | 12q24.31 |
| LU5_AD  | 4  | 20 | 19 | 38,352,701 | 21,597,231  | 20q12   | 19p12    |
| LU12_L  | 3  | 1  | 2  | 38,378,970 | 47,812,574  | 1p34.3  | 2p16.3   |
| LU16_AD | 3  | 7  | 7  | 38,386,370 | 39,946,023  | 7p14.1  | 7p14.1   |
| LU21_AD | 3  | 9  | 9  | 38,418,666 | 29,382,795  | 9p13.1  | 9p21.1   |
| LU21_L  | 7  | 9  | 9  | 38,418,773 | 29,383,243  | 9p13.1  | 9p21.1   |
| LU15_L  | 7  | 9  | 20 | 38,437,240 | 56,046,141  | 9p13.1  | 20q13.31 |
| LU15_AD | 7  | 9  | 20 | 38,437,816 | 56,040,698  | 9p13.1  | 20q13.31 |
| LU18_L  | 3  | 10 | 10 | 38,454,863 | 51,739,065  | 10p11.1 | 10q11.23 |
| LU14_AD | 6  | 14 | 16 | 38,488,548 | 67,081,527  | 14q21.1 | 16q22.1  |
| LU6_L   | 3  | 7  | 7  | 38,498,609 | 38,536,431  | 7p14.1  | 7p14.1   |
| LU6_L   | 10 | 2  | 2  | 38,507,160 | 42,510,486  | 2p22.2  | 2p21     |
| LU6_L   | 3  | 7  | 7  | 38,536,431 | 38,498,609  | 7p14.1  | 7p14.1   |
| LU4_AD  | 3  | 2  | 2  | 38,559,684 | 38,593,145  | 2p22.2  | 2p22.1   |
| LU8_AD  | 4  | 10 | 16 | 38,567,192 | 46,463,252  | 10p11.1 | 16q11.2  |
| LU6_L   | 8  | 2  | 2  | 38,567,641 | 25,853,900  | 2p22.2  | 2p23.3   |
| LU7_AD  | 3  | 6  | 13 | 38,590,473 | 111,843,214 | 6p21.2  | 13q34    |
| LU4_AD  | 3  | 2  | 2  | 38,593,145 | 38,559,684  | 2p22.1  | 2p22.2   |
| LU15_AD | 9  | 9  | 20 | 38,603,164 | 59,510,914  | 9p13.1  | 20q13.33 |
| LU6_L   | 5  | 2  | 16 | 38,606,030 | 32,957,986  | 2p22.1  | 16p11.2  |
| LU7_L   | 3  | 7  | 19 | 38,616,740 | 58,959,572  | 7p14.1  | 19q13.43 |
| LU21_AD | 3  | 12 | 12 | 38,648,795 | 38,699,508  | 12q12   | 12q12    |
| LU4_L   | 3  | 12 | 10 | 38,673,319 | 43,167,969  | 12q12   | 10q11.21 |
| LU4_AD  | 17 | 7  | 7  | 38,698,996 | 46,156,481  | 7p14.1  | 7p12.3   |
| LU21_AD | 3  | 12 | 12 | 38,699,508 | 38,648,795  | 12q12   | 12q12    |
| LU12_AD | 3  | 10 | 16 | 38,738,599 | 90,235,286  | 10p11.1 | 16q24.3  |
| LU3_AD  | 3  | 12 | 12 | 38,751,078 | 74,904,723  | 12q12   | 12q21.1  |
| LU6_AD  | 6  | 2  | 2  | 38,774,835 | 30,193,384  | 2p22.1  | 2p23.1   |
| LU6_L   | 14 | 2  | 2  | 38,776,862 | 30,190,969  | 2p22.1  | 2p23.1   |
| LU3_AD  | 3  | 12 | 12 | 38,823,825 | 70,310,300  | 12q12   | 12q15    |
| LU12_L  | 9  | 8  | 8  | 38,841,279 | 9,282,956   | 8p11.22 | 8p23.1   |
| LU4_AD  | 4  | 13 | 13 | 38,866,567 | 38,902,647  | 13q13.3 | 13q13.3  |
| LU3_AD  | 4  | 12 | 12 | 38,878,332 | 20,863,629  | 12q12   | 12p12.2  |
| LU3_L   | 3  | 1  | 2  | 38,886,269 | 225,162,492 | 1p34.3  | 2q36.1   |
| LU3_AD  | 3  | 12 | 12 | 38,889,566 | 38,930,748  | 12q12   | 12q12    |
| LU16_AD | 3  | 10 | 18 | 38,892,850 | 15,198,597  | 10p11.1 | 18p11.21 |
| LU7_L   | 5  | 7  | 7  | 38,894,076 | 25,809,780  | 7p14.1  | 7p15.2   |
| LU4_AD  | 4  | 13 | 13 | 38,902,647 | 38,866,567  | 13q13.3 | 13q13.3  |
| LU3_AD  | 3  | 12 | 12 | 38,930,748 | 38,889,566  | 12q12   | 12q12    |

|         |    |    |    |            |             |         |          |
|---------|----|----|----|------------|-------------|---------|----------|
| LU6_L   | 9  | 13 | 21 | 38,935,120 | 34,832,936  | 13q13.3 | 21q22.11 |
| LU12_L  | 6  | 8  | 8  | 38,951,961 | 40,285,491  | 8p11.22 | 8p11.21  |
| LU21_AD | 4  | 5  | 5  | 39,017,161 | 39,048,642  | 5p13.1  | 5p13.1   |
| LU7_L   | 4  | 10 | 16 | 39,029,739 | 33,805,844  | 10p11.1 | 16p11.2  |
| LU12_L  | 3  | 10 | 16 | 39,030,861 | 33,804,661  | 10p11.1 | 16p11.2  |
| LU20_AD | 3  | 10 | 16 | 39,031,385 | 33,804,107  | 10p11.1 | 16p11.2  |
| LU21_AD | 3  | 10 | 1  | 39,038,067 | 148,846,826 | 10p11.1 | 1q21.2   |
| LU21_AD | 6  | 9  | 5  | 39,044,641 | 179,155,246 | 9p13.1  | 5q35.3   |
| LU21_L  | 6  | 9  | 5  | 39,045,847 | 179,153,939 | 9p13.1  | 5q35.3   |
| LU21_AD | 4  | 5  | 5  | 39,048,642 | 39,017,161  | 5p13.1  | 5p13.1   |
| LU14_L  | 5  | 11 | 11 | 39,077,865 | 39,108,483  | 11p12   | 11p12    |
| LU3_AD  | 5  | 12 | 12 | 39,086,108 | 74,253,895  | 12q12   | 12q21.1  |
| LU12_AD | 3  | 14 | 14 | 39,089,489 | 39,120,462  | 14q21.1 | 14q21.1  |
| LU14_L  | 5  | 11 | 11 | 39,108,483 | 39,077,865  | 11p12   | 11p12    |
| LU20_AD | 5  | 4  | 4  | 39,111,777 | 32,492,288  | 4p14    | 4p15.1   |
| LU20_L  | 5  | 4  | 4  | 39,112,384 | 32,492,110  | 4p14    | 4p15.1   |
| LU3_L   | 6  | 8  | 8  | 39,113,634 | 39,143,669  | 8p11.22 | 8p11.22  |
| LU12_AD | 3  | 14 | 14 | 39,120,462 | 39,089,489  | 14q21.1 | 14q21.1  |
| LU18_AD | 11 | 5  | 5  | 39,136,118 | 88,580,309  | 5p13.1  | 5q14.3   |
| LU18_L  | 12 | 5  | 5  | 39,136,522 | 88,580,629  | 5p13.1  | 5q14.3   |
| LU3_L   | 6  | 8  | 8  | 39,143,669 | 39,113,634  | 8p11.22 | 8p11.22  |
| LU20_AD | 3  | 14 | 8  | 39,305,578 | 144,342,705 | 14q21.1 | 8q24.3   |
| LU16_AD | 4  | 9  | 9  | 39,351,451 | 43,667,228  | 9p13.1  | 9p11.2   |
| LU16_AD | 4  | 9  | 9  | 39,351,610 | 65,558,878  | 9p13.1  | 9q12     |
| LU16_L  | 4  | 9  | 9  | 39,351,780 | 43,668,348  | 9p13.1  | 9p11.2   |
| LU4_L   | 3  | 20 | 20 | 39,411,409 | 39,452,867  | 20q12   | 20q12    |
| LU4_L   | 3  | 15 | 15 | 39,422,331 | 39,452,709  | 15q14   | 15q14    |
| LU18_L  | 4  | 3  | 12 | 39,452,316 | 68,946,972  | 3p22.1  | 12q15    |
| LU4_L   | 3  | 15 | 15 | 39,452,709 | 39,422,331  | 15q14   | 15q14    |
| LU4_L   | 3  | 20 | 20 | 39,452,867 | 39,411,409  | 20q12   | 20q12    |
| LU20_AD | 3  | 5  | 4  | 39,453,205 | 149,260,151 | 5p13.1  | 4q31.23  |
| LU12_L  | 34 | 8  | 8  | 39,582,797 | 15,018,600  | 8p11.22 | 8p22     |
| LU3_AD  | 3  | 6  | 6  | 39,588,766 | 39,625,152  | 6p21.2  | 6p21.2   |
| LU4_AD  | 4  | 3  | 5  | 39,624,362 | 160,671,933 | 3p22.1  | 5q34     |
| LU3_AD  | 3  | 6  | 6  | 39,625,152 | 39,588,766  | 6p21.2  | 6p21.2   |
| LU3_L   | 3  | 9  | 9  | 39,654,288 | 41,827,551  | 9p13.1  | 9p12     |
| LU12_AD | 4  | 8  | 4  | 39,730,930 | 100,107,686 | 8p11.21 | 4q23     |
| LU7_AD  | 5  | 7  | 12 | 39,775,283 | 20,693,416  | 7p14.1  | 12p12.2  |
| LU7_AD  | 4  | 7  | 10 | 39,839,266 | 24,357,317  | 7p14.1  | 10p12.2  |
| LU14_L  | 12 | 22 | 22 | 39,854,797 | 40,085,787  | 22q13.1 | 22q13.1  |
| LU18_L  | 3  | 7  | 2  | 39,876,623 | 131,392,269 | 7p14.1  | 2q21.1   |
| LU16_AD | 3  | 7  | 7  | 39,946,023 | 38,386,370  | 7p14.1  | 7p14.1   |
| LU14_L  | 12 | 22 | 22 | 40,085,787 | 39,854,797  | 22q13.1 | 22q13.1  |
| LU21_AD | 7  | 7  | 7  | 40,098,389 | 37,705,388  | 7p14.1  | 7p14.1   |

|         |    |    |    |            |             |          |          |
|---------|----|----|----|------------|-------------|----------|----------|
| LU3_L   | 3  | 5  | 1  | 40,107,016 | 160,671,144 | 5p13.1   | 1q23.3   |
| LU4_AD  | 3  | 5  | 4  | 40,107,508 | 4,047,721   | 5p13.1   | 4p16.3   |
| LU7_AD  | 4  | 7  | 7  | 40,160,397 | 144,209,843 | 7p14.1   | 7q35     |
| LU18_AD | 3  | 7  | 2  | 40,204,436 | 33,888,825  | 7p14.1   | 2p22.3   |
| LU20_AD | 3  | 9  | 9  | 40,218,976 | 65,869,783  | 9p13.1   | 9q12     |
| LU14_L  | 4  | 22 | 22 | 40,231,161 | 37,575,249  | 22q13.1  | 22q12.3  |
| LU12_L  | 21 | 8  | 8  | 40,284,330 | 12,595,431  | 8p11.21  | 8p23.1   |
| LU12_L  | 6  | 8  | 8  | 40,285,491 | 38,951,961  | 8p11.21  | 8p11.22  |
| LU21_L  | 4  | 3  | 4  | 40,294,147 | 156,386,129 | 3p22.1   | 4q32.1   |
| LU18_AD | 3  | 5  | 12 | 40,325,801 | 58,051,467  | 5p13.1   | 12q13.3  |
| LU3_L   | 3  | 13 | 13 | 40,326,003 | 40,355,744  | 13q14.11 | 13q14.11 |
| LU5_L   | 4  | 15 | 11 | 40,328,100 | 93,269,086  | 15q15.1  | 11q21    |
| LU3_L   | 3  | 8  | 8  | 40,329,168 | 40,358,697  | 8p11.21  | 8p11.21  |
| LU3_AD  | 3  | 12 | 12 | 40,333,825 | 68,587,829  | 12q12    | 12q15    |
| LU20_AD | 4  | 12 | 4  | 40,353,936 | 1,923,432   | 12q12    | 4p16.3   |
| LU3_L   | 3  | 13 | 13 | 40,355,744 | 40,326,003  | 13q14.11 | 13q14.11 |
| LU3_L   | 3  | 8  | 8  | 40,358,697 | 40,329,168  | 8p11.21  | 8p11.21  |
| LU3_L   | 3  | 11 | 11 | 40,385,601 | 40,435,619  | 11p12    | 11p12    |
| LU3_L   | 3  | 12 | 12 | 40,399,097 | 40,430,726  | 12q12    | 12q12    |
| LU3_L   | 3  | 12 | 12 | 40,430,726 | 40,399,097  | 12q12    | 12q12    |
| LU3_L   | 3  | 11 | 11 | 40,435,619 | 40,385,601  | 11p12    | 11p12    |
| LU3_AD  | 5  | 12 | 12 | 40,451,561 | 73,489,536  | 12q12    | 12q21.1  |
| LU3_AD  | 4  | 18 | 18 | 40,576,940 | 40,612,997  | 18q12.3  | 18q12.3  |
| LU3_AD  | 4  | 18 | 18 | 40,612,997 | 40,576,940  | 18q12.3  | 18q12.3  |
| LU4_AD  | 10 | 7  | 7  | 40,620,297 | 19,151,766  | 7p14.1   | 7p21.1   |
| LU12_L  | 11 | 8  | 8  | 40,639,526 | 18,892,143  | 8p11.21  | 8p22     |
| LU18_L  | 4  | 15 | 11 | 40,660,559 | 6,647,180   | 15q15.1  | 11p15.4  |
| LU7_AD  | 4  | 15 | 7  | 40,712,074 | 40,715,653  | 15q15.1  | 7p14.1   |
| LU7_AD  | 4  | 7  | 15 | 40,715,653 | 40,712,074  | 7p14.1   | 15q15.1  |
| LU12_AD | 4  | 22 | 22 | 40,723,999 | 34,988,007  | 22q13.1  | 22q12.3  |
| LU18_L  | 14 | 15 | 5  | 40,732,617 | 751,751     | 15q15.1  | 5p15.33  |
| LU21_AD | 3  | 20 | 20 | 40,758,375 | 40,805,819  | 20q12    | 20q12    |
| LU6_L   | 3  | 20 | 20 | 40,772,316 | 40,804,030  | 20q12    | 20q12    |
| LU6_L   | 3  | 20 | 20 | 40,804,030 | 40,772,316  | 20q12    | 20q12    |
| LU21_AD | 3  | 20 | 20 | 40,805,819 | 40,758,375  | 20q12    | 20q12    |
| LU15_L  | 5  | 6  | 1  | 40,828,606 | 210,365,755 | 6p21.1   | 1q32.2   |
| LU15_L  | 5  | 6  | 3  | 40,829,562 | 167,148,241 | 6p21.1   | 3q26.1   |
| LU12_AD | 3  | 6  | 4  | 40,831,269 | 154,983,218 | 6p21.1   | 4q31.3   |
| LU11_AD | 3  | 6  | 11 | 40,833,255 | 68,395,816  | 6p21.1   | 11q13.2  |
| LU16_AD | 4  | 6  | 1  | 40,835,401 | 210,364,586 | 6p21.1   | 1q32.2   |
| LU3_L   | 4  | 2  | 2  | 40,896,570 | 98,438,710  | 2p22.1   | 2q11.2   |
| LU12_L  | 4  | 2  | 15 | 40,900,886 | 92,752,306  | 2p22.1   | 15q26.1  |
| LU7_AD  | 5  | 7  | 7  | 40,938,659 | 24,925,577  | 7p14.1   | 7p15.3   |
| LU18_L  | 7  | 18 | 15 | 41,016,919 | 58,943,378  | 18q12.3  | 15q21.3  |

|         |    |    |    |            |             |          |          |
|---------|----|----|----|------------|-------------|----------|----------|
| LU3_L   | 4  | 7  | 7  | 41,093,521 | 41,133,430  | 7p14.1   | 7p14.1   |
| LU4_AD  | 3  | 21 | 19 | 41,111,947 | 22,934,411  | 21q22.2  | 19p12    |
| LU3_L   | 4  | 7  | 7  | 41,133,430 | 41,093,521  | 7p14.1   | 7p14.1   |
| LU15_L  | 3  | 9  | 9  | 41,134,127 | 31,415,806  | 9p12     | 9p21.1   |
| LU14_L  | 9  | 18 | 11 | 41,202,388 | 116,534,389 | 18q12.3  | 11q23.3  |
| LU16_AD | 7  | 3  | 3  | 41,215,115 | 41,317,488  | 3p22.1   | 3p22.1   |
| LU15_AD | 3  | 21 | 21 | 41,282,169 | 41,336,866  | 21q22.2  | 21q22.2  |
| LU21_L  | 4  | 5  | 5  | 41,315,610 | 36,944,540  | 5p13.1   | 5p13.2   |
| LU16_AD | 7  | 3  | 3  | 41,317,488 | 41,215,115  | 3p22.1   | 3p22.1   |
| LU15_AD | 3  | 21 | 21 | 41,336,866 | 41,282,169  | 21q22.2  | 21q22.2  |
| LU7_L   | 7  | 15 | 12 | 41,398,267 | 61,641,000  | 15q15.1  | 12q14.1  |
| LU4_L   | 3  | 13 | 13 | 41,423,812 | 52,826,576  | 13q14.11 | 13q14.3  |
| LU12_L  | 3  | 8  | 8  | 41,425,711 | 16,642,943  | 8p11.21  | 8p22     |
| LU4_L   | 3  | 11 | 11 | 41,509,120 | 41,543,866  | 11p12    | 11p12    |
| LU21_L  | 3  | 23 | 10 | 41,533,593 | 23,427,764  | Xp11.4   | 10p12.2  |
| LU4_L   | 3  | 11 | 11 | 41,543,866 | 41,509,120  | 11p12    | 11p12    |
| LU3_L   | 3  | 7  | 8  | 41,596,156 | 33,938,198  | 7p14.1   | 8p12     |
| LU4_AD  | 3  | 2  | 10 | 41,608,064 | 107,486,851 | 2p22.1   | 10q25.1  |
| LU12_L  | 36 | 8  | 8  | 41,635,000 | 8,946,105   | 8p11.21  | 8p23.1   |
| LU4_AD  | 3  | 12 | 12 | 41,645,207 | 41,675,808  | 12q12    | 12q12    |
| LU14_L  | 4  | 20 | 19 | 41,650,123 | 42,998,849  | 20q12    | 19q13.2  |
| LU14_AD | 7  | 20 | 19 | 41,650,212 | 43,002,979  | 20q12    | 19q13.2  |
| LU18_AD | 3  | 11 | 5  | 41,670,043 | 21,660,757  | 11p12    | 5p14.3   |
| LU4_AD  | 3  | 12 | 12 | 41,675,808 | 41,645,207  | 12q12    | 12q12    |
| LU7_L   | 5  | 23 | 23 | 41,693,852 | 41,725,836  | Xp11.4   | Xp11.4   |
| LU4_AD  | 4  | 14 | 10 | 41,705,124 | 94,990,957  | 14q21.1  | 10q23.33 |
| LU7_L   | 5  | 23 | 23 | 41,725,836 | 41,693,852  | Xp11.4   | Xp11.4   |
| LU6_AD  | 5  | 2  | 2  | 41,726,568 | 29,384,800  | 2p22.1   | 2p23.2   |
| LU6_L   | 10 | 2  | 2  | 41,728,278 | 29,384,180  | 2p22.1   | 2p23.2   |
| LU7_L   | 3  | 7  | 12 | 41,820,913 | 20,315,182  | 7p14.1   | 12p12.2  |
| LU3_L   | 3  | 9  | 9  | 41,827,551 | 39,654,288  | 9p12     | 9p13.1   |
| LU3_AD  | 3  | 12 | 12 | 41,913,343 | 44,712,653  | 12q12    | 12q12    |
| LU16_AD | 16 | 9  | 9  | 41,942,156 | 8,373,985   | 9p12     | 9p24.1   |
| LU16_AD | 3  | 9  | 9  | 41,942,816 | 15,999,498  | 9p12     | 9p22.3   |
| LU4_L   | 3  | 9  | 4  | 41,951,596 | 132,635,182 | 9p12     | 4q28.3   |
| LU4_AD  | 4  | 19 | 9  | 41,966,048 | 108,554,117 | 19q13.2  | 9q31.2   |
| LU21_AD | 5  | 19 | 6  | 41,967,424 | 58,583,054  | 19q13.2  | 6p11.2   |
| LU3_L   | 3  | 19 | 5  | 41,967,992 | 135,136,036 | 19q13.2  | 5q31.1   |
| LU3_L   | 5  | 19 | 5  | 41,970,292 | 146,611,801 | 19q13.2  | 5q32     |
| LU20_AD | 3  | 19 | 9  | 41,971,186 | 69,191,285  | 19q13.2  | 9q21.11  |
| LU18_L  | 3  | 19 | 5  | 41,971,354 | 146,609,849 | 19q13.2  | 5q32     |
| LU6_AD  | 5  | 5  | 5  | 42,011,709 | 178,785,134 | 5p13.1   | 5q35.3   |
| LU20_AD | 3  | 19 | 15 | 42,011,818 | 36,906,516  | 19q13.2  | 15q14    |
| LU8_L   | 3  | 19 | 2  | 42,012,220 | 231,438,156 | 19q13.2  | 2q37.1   |

|         |    |    |    |            |             |          |          |
|---------|----|----|----|------------|-------------|----------|----------|
| LU20_AD | 5  | 19 | 1  | 42,012,842 | 154,129,802 | 19q13.2  | 1q21.3   |
| LU15_L  | 5  | 19 | 1  | 42,013,023 | 154,129,610 | 19q13.2  | 1q21.3   |
| LU7_L   | 5  | 19 | 1  | 42,013,351 | 154,129,260 | 19q13.2  | 1q21.3   |
| LU11_AD | 5  | 19 | 2  | 42,014,390 | 231,437,891 | 19q13.2  | 2q37.1   |
| LU21_L  | 4  | 19 | 1  | 42,014,912 | 154,129,227 | 19q13.2  | 1q21.3   |
| LU8_L   | 4  | 19 | 1  | 42,016,420 | 154,145,341 | 19q13.2  | 1q21.3   |
| LU3_L   | 3  | 19 | 1  | 42,016,458 | 154,130,076 | 19q13.2  | 1q21.3   |
| LU7_AD  | 5  | 19 | 8  | 42,018,474 | 108,585,571 | 19q13.2  | 8q23.1   |
| LU3_AD  | 3  | 9  | 9  | 42,025,150 | 46,451,499  | 9p12     | 9p11.2   |
| LU7_L   | 4  | 7  | 7  | 42,037,078 | 42,092,968  | 7p14.1   | 7p14.1   |
| LU3_L   | 5  | 21 | 21 | 42,044,995 | 42,082,879  | 21q22.2  | 21q22.2  |
| LU21_L  | 3  | 18 | 18 | 42,079,326 | 42,119,320  | 18q12.3  | 18q12.3  |
| LU3_L   | 5  | 21 | 21 | 42,082,879 | 42,044,995  | 21q22.2  | 21q22.2  |
| LU7_L   | 4  | 7  | 7  | 42,092,968 | 42,037,078  | 7p14.1   | 7p14.1   |
| LU18_L  | 4  | 17 | 1  | 42,097,138 | 226,724,201 | 17q21.31 | 1q42.12  |
| LU16_L  | 4  | 7  | 9  | 42,101,895 | 33,039,530  | 7p14.1   | 9p21.1   |
| LU3_L   | 3  | 5  | 11 | 42,109,111 | 85,321,194  | 5p13.1   | 11q14.1  |
| LU21_AD | 3  | 5  | 2  | 42,111,362 | 9,039,237   | 5p13.1   | 2p25.1   |
| LU4_L   | 5  | 9  | 9  | 42,111,491 | 45,516,647  | 9p12     | 9p11.2   |
| LU12_L  | 4  | 6  | 14 | 42,119,223 | 57,799,594  | 6p21.1   | 14q22.3  |
| LU21_L  | 3  | 18 | 18 | 42,119,320 | 42,079,326  | 18q12.3  | 18q12.3  |
| LU16_L  | 3  | 7  | 9  | 42,120,362 | 65,885,039  | 7p14.1   | 9q12     |
| LU3_L   | 5  | 12 | 12 | 42,128,082 | 42,158,407  | 12q12    | 12q12    |
| LU12_L  | 5  | 8  | 8  | 42,131,101 | 26,568,382  | 8p11.21  | 8p21.2   |
| LU5_AD  | 3  | 20 | 20 | 42,141,179 | 42,172,293  | 20q13.12 | 20q13.12 |
| LU20_AD | 3  | 11 | 8  | 42,144,779 | 129,628,942 | 11p12    | 8q24.21  |
| LU3_L   | 5  | 12 | 12 | 42,158,407 | 42,128,082  | 12q12    | 12q12    |
| LU5_AD  | 3  | 20 | 20 | 42,172,293 | 42,141,179  | 20q13.12 | 20q13.12 |
| LU4_L   | 5  | 18 | 13 | 42,186,460 | 21,884,939  | 18q12.3  | 13q12.11 |
| LU5_L   | 3  | 21 | 21 | 42,209,213 | 42,239,562  | 21q22.2  | 21q22.2  |
| LU11_AD | 3  | 12 | 12 | 42,218,061 | 42,253,288  | 12q12    | 12q12    |
| LU5_L   | 3  | 21 | 21 | 42,239,562 | 42,209,213  | 21q22.2  | 21q22.2  |
| LU6_L   | 23 | 2  | 16 | 42,251,115 | 24,958,866  | 2p21     | 16p12.1  |
| LU6_AD  | 11 | 2  | 16 | 42,253,160 | 24,957,552  | 2p21     | 16p12.1  |
| LU11_AD | 3  | 12 | 12 | 42,253,288 | 42,218,061  | 12q12    | 12q12    |
| LU16_AD | 3  | 4  | 8  | 42,289,151 | 81,649,805  | 4p13     | 8q21.13  |
| LU15_AD | 4  | 9  | 20 | 42,298,738 | 61,899,660  | 9p12     | 20q13.33 |
| LU18_AD | 3  | 4  | 7  | 42,319,609 | 43,857,995  | 4p13     | 7p13     |
| LU14_AD | 6  | 10 | 1  | 42,358,772 | 143,737,381 | 10q11.21 | 1q21.1   |
| LU3_L   | 4  | 9  | 25 | 42,365,460 | 1,227,628   | 9p12     | 25       |
| LU14_L  | 5  | 10 | 1  | 42,369,435 | 143,162,686 | 10q11.21 | 1q21.1   |
| LU21_AD | 3  | 23 | 23 | 42,372,447 | 42,416,355  | Xp11.4   | Xp11.3   |
| LU14_AD | 7  | 10 | 1  | 42,378,813 | 143,161,423 | 10q11.21 | 1q21.1   |
| LU14_L  | 4  | 10 | 1  | 42,383,599 | 155,406,759 | 10q11.21 | 1q22     |

|         |    |    |    |            |             |          |          |
|---------|----|----|----|------------|-------------|----------|----------|
| LU14_AD | 11 | 10 | 5  | 42,385,208 | 26,359,985  | 10q11.21 | 5p14.1   |
| LU3_L   | 3  | 1  | 15 | 42,411,118 | 67,265,436  | 1p34.2   | 15q22.32 |
| LU21_AD | 3  | 23 | 23 | 42,416,355 | 42,372,447  | Xp11.3   | Xp11.4   |
| LU15_L  | 4  | 8  | 15 | 42,417,052 | 92,754,632  | 8p11.21  | 15q26.1  |
| LU6_L   | 9  | 2  | 2  | 42,426,471 | 38,172,570  | 2p21     | 2p22.2   |
| LU4_AD  | 3  | 5  | 5  | 42,484,924 | 42,517,801  | 5p13.1   | 5p12     |
| LU6_L   | 10 | 2  | 2  | 42,510,486 | 38,507,160  | 2p21     | 2p22.2   |
| LU4_AD  | 3  | 5  | 5  | 42,517,801 | 42,484,924  | 5p12     | 5p13.1   |
| LU20_AD | 5  | 3  | 3  | 42,530,556 | 42,564,626  | 3p22.1   | 3p22.1   |
| LU6_AD  | 3  | 2  | 16 | 42,551,595 | 33,688,719  | 2p21     | 16p11.2  |
| LU6_L   | 5  | 2  | 16 | 42,552,203 | 33,687,989  | 2p21     | 16p11.2  |
| LU6_L   | 15 | 2  | 2  | 42,554,761 | 29,550,885  | 2p21     | 2p23.2   |
| LU6_AD  | 9  | 2  | 2  | 42,555,236 | 29,551,088  | 2p21     | 2p23.2   |
| LU3_AD  | 3  | 6  | 6  | 42,557,261 | 42,592,103  | 6p21.1   | 6p21.1   |
| LU20_AD | 5  | 3  | 3  | 42,564,626 | 42,530,556  | 3p22.1   | 3p22.1   |
| LU12_L  | 11 | 8  | 8  | 42,571,235 | 18,895,081  | 8p11.21  | 8p22     |
| LU12_L  | 7  | 8  | 8  | 42,575,552 | 16,638,349  | 8p11.21  | 8p22     |
| LU6_L   | 9  | 2  | 2  | 42,585,633 | 30,325,395  | 2p21     | 2p23.1   |
| LU3_AD  | 3  | 6  | 6  | 42,592,103 | 42,557,261  | 6p21.1   | 6p21.1   |
| LU18_AD | 4  | 10 | 16 | 42,627,345 | 33,095,862  | 10q11.21 | 16p11.2  |
| LU12_L  | 5  | 23 | 12 | 42,628,842 | 118,918,914 | Xp11.3   | 12q24.23 |
| LU21_AD | 4  | 7  | 7  | 42,630,786 | 45,785,045  | 7p14.1   | 7p12.3   |
| LU14_L  | 3  | 18 | 18 | 42,662,473 | 42,713,614  | 18q12.3  | 18q12.3  |
| LU15_AD | 3  | 9  | 9  | 42,664,294 | 70,859,424  | 9p12     | 9q21.11  |
| LU18_AD | 3  | 9  | 9  | 42,679,048 | 70,875,200  | 9p12     | 9q21.11  |
| LU14_L  | 3  | 18 | 18 | 42,713,614 | 42,662,473  | 18q12.3  | 18q12.3  |
| LU8_L   | 3  | 10 | 21 | 42,726,484 | 15,429,244  | 10q11.21 | 21q11.2  |
| LU18_AD | 5  | 11 | 15 | 42,749,723 | 35,949,938  | 11p12    | 15q14    |
| LU18_L  | 4  | 11 | 15 | 42,749,851 | 35,949,191  | 11p12    | 15q14    |
| LU21_L  | 4  | 9  | 9  | 42,758,534 | 29,385,045  | 9p12     | 9p21.1   |
| LU5_L   | 3  | 9  | 9  | 42,775,952 | 67,328,729  | 9p12     | 9q13     |
| LU20_L  | 3  | 11 | 10 | 42,901,704 | 5,094,717   | 11p12    | 10p15.1  |
| LU7_L   | 3  | 7  | 7  | 42,924,387 | 19,428,946  | 7p14.1   | 7p21.1   |
| LU11_AD | 17 | 12 | 20 | 42,996,032 | 60,145,128  | 12q12    | 20q13.33 |
| LU14_L  | 4  | 19 | 20 | 42,998,849 | 41,650,123  | 19q13.2  | 20q12    |
| LU14_AD | 7  | 19 | 20 | 43,002,979 | 41,650,212  | 19q13.2  | 20q12    |
| LU11_L  | 6  | 12 | 12 | 43,021,806 | 67,259,192  | 12q12    | 12q14.3  |
| LU11_AD | 12 | 12 | 12 | 43,024,796 | 67,257,705  | 12q12    | 12q14.3  |
| LU11_L  | 11 | 12 | 12 | 43,029,660 | 56,436,034  | 12q12    | 12q13.2  |
| LU11_AD | 14 | 12 | 12 | 43,029,754 | 56,437,692  | 12q12    | 12q13.2  |
| LU4_AD  | 4  | 19 | 1  | 43,032,863 | 74,771,728  | 19q13.2  | 1p31.1   |
| LU11_L  | 7  | 12 | 12 | 43,045,311 | 56,429,740  | 12q12    | 12q13.2  |
| LU11_L  | 8  | 12 | 20 | 43,058,591 | 56,527,461  | 12q12    | 20q13.32 |
| LU5_L   | 7  | 9  | 9  | 43,105,104 | 67,288,375  | 9p12     | 9q13     |



|         |    |    |    |            |             |          |          |
|---------|----|----|----|------------|-------------|----------|----------|
| LU18_L  | 8  | 9  | 9  | 43,105,142 | 67,287,757  | 9p12     | 9q13     |
| LU6_AD  | 3  | 9  | 9  | 43,105,159 | 67,288,917  | 9p12     | 9q13     |
| LU5_L   | 3  | 9  | 9  | 43,105,161 | 33,401,983  | 9p12     | 9p13.3   |
| LU8_L   | 4  | 9  | 9  | 43,105,654 | 33,401,208  | 9p12     | 9p13.3   |
| LU8_L   | 9  | 9  | 9  | 43,105,858 | 67,287,758  | 9p12     | 9q13     |
| LU5_AD  | 11 | 9  | 9  | 43,105,897 | 67,288,247  | 9p12     | 9q13     |
| LU18_AD | 4  | 9  | 9  | 43,106,644 | 67,286,639  | 9p12     | 9q13     |
| LU6_L   | 7  | 9  | 9  | 43,106,861 | 67,287,091  | 9p12     | 9q13     |
| LU18_L  | 4  | 9  | 24 | 43,140,344 | 13,269,870  | 9p12     | Yq11.1   |
| LU4_L   | 3  | 10 | 12 | 43,167,969 | 38,673,319  | 10q11.21 | 12q12    |
| LU18_L  | 4  | 11 | 8  | 43,169,494 | 83,282,360  | 11p12    | 8q21.13  |
| LU4_AD  | 14 | 10 | 19 | 43,170,182 | 34,761,401  | 10q11.21 | 19q13.11 |
| LU4_L   | 4  | 10 | 19 | 43,171,719 | 34,760,361  | 10q11.21 | 19q13.11 |
| LU20_AD | 4  | 11 | 13 | 43,177,546 | 93,746,063  | 11p12    | 13q31.3  |
| LU14_L  | 4  | 12 | 1  | 43,180,840 | 148,631,954 | 12q12    | 1q21.2   |
| LU14_L  | 3  | 12 | 1  | 43,182,475 | 149,539,327 | 12q12    | 1q21.2   |
| LU12_L  | 5  | 11 | 5  | 43,183,867 | 113,485,802 | 11p12    | 5q22.3   |
| LU11_L  | 16 | 12 | 12 | 43,210,338 | 58,848,881  | 12q12    | 12q14.1  |
| LU11_AD | 49 | 12 | 12 | 43,212,187 | 55,820,011  | 12q12    | 12q13.2  |
| LU11_L  | 37 | 12 | 12 | 43,212,668 | 55,820,145  | 12q12    | 12q13.2  |
| LU14_AD | 3  | 11 | 11 | 43,279,635 | 43,310,451  | 11p12    | 11p12    |
| LU14_AD | 3  | 11 | 11 | 43,310,451 | 43,279,635  | 11p12    | 11p12    |
| LU12_L  | 3  | 1  | 1  | 43,323,343 | 225,072,508 | 1p34.2   | 1q42.12  |
| LU4_AD  | 3  | 15 | 10 | 43,347,705 | 11,725,971  | 15q15.2  | 10p14    |
| LU4_AD  | 3  | 1  | 17 | 43,351,931 | 76,109,356  | 1p34.2   | 17q25.3  |
| LU3_L   | 3  | 10 | 10 | 43,412,172 | 43,448,278  | 10q11.21 | 10q11.21 |
| LU18_L  | 5  | 11 | 7  | 43,417,261 | 23,498,666  | 11p12    | 7p15.3   |
| LU18_AD | 4  | 11 | 7  | 43,418,379 | 23,497,584  | 11p12    | 7p15.3   |
| LU3_L   | 3  | 10 | 10 | 43,448,278 | 43,412,172  | 10q11.21 | 10q11.21 |
| LU3_AD  | 4  | 12 | 12 | 43,551,639 | 22,785,179  | 12q12    | 12p12.1  |
| LU4_AD  | 13 | 10 | 9  | 43,624,198 | 129,401,997 | 10q11.21 | 9q33.3   |
| LU4_AD  | 5  | 3  | 14 | 43,641,597 | 22,163,640  | 3p22.1   | 14q11.2  |
| LU18_L  | 3  | 19 | 19 | 43,645,229 | 43,742,568  | 19q13.31 | 19q13.31 |
| LU16_AD | 4  | 9  | 9  | 43,667,228 | 39,351,451  | 9p11.2   | 9p13.1   |
| LU16_L  | 4  | 9  | 9  | 43,668,348 | 39,351,780  | 9p11.2   | 9p13.1   |
| LU6_L   | 5  | 6  | 24 | 43,710,316 | 28,715,557  | 6p21.1   | Yq11.23  |
| LU18_L  | 3  | 19 | 19 | 43,742,568 | 43,645,229  | 19q13.31 | 19q13.31 |
| LU12_AD | 4  | 20 | 20 | 43,798,337 | 43,841,533  | 20q13.12 | 20q13.12 |
| LU3_AD  | 3  | 12 | 12 | 43,821,179 | 45,264,102  | 12q12    | 12q12    |
| LU3_L   | 3  | 6  | 15 | 43,834,931 | 88,944,798  | 6p21.1   | 15q25.3  |
| LU12_AD | 4  | 20 | 20 | 43,841,533 | 43,798,337  | 20q13.12 | 20q13.12 |
| LU15_L  | 3  | 17 | 17 | 43,844,765 | 43,895,876  | 17q21.31 | 17q21.31 |
| LU18_AD | 3  | 7  | 4  | 43,857,995 | 42,319,609  | 7p13     | 4p13     |
| LU12_L  | 3  | 7  | 9  | 43,861,270 | 88,976,894  | 7p13     | 9q21.33  |

|         |    |    |    |            |             |          |          |
|---------|----|----|----|------------|-------------|----------|----------|
| LU15_L  | 3  | 17 | 17 | 43,895,876 | 43,844,765  | 17q21.31 | 17q21.31 |
| LU8_L   | 3  | 10 | 5  | 44,082,941 | 34,785,232  | 10q11.21 | 5p13.2   |
| LU4_AD  | 3  | 10 | 13 | 44,090,899 | 99,410,223  | 10q11.21 | 13q32.3  |
| LU16_AD | 19 | 9  | 9  | 44,227,709 | 8,380,924   | 9p11.2   | 9p24.1   |
| LU16_L  | 5  | 9  | 9  | 44,233,160 | 15,999,462  | 9p11.2   | 9p22.3   |
| LU16_AD | 28 | 9  | 9  | 44,233,967 | 15,997,279  | 9p11.2   | 9p22.3   |
| LU18_L  | 3  | 7  | 7  | 44,273,117 | 44,303,801  | 7p13     | 7p13     |
| LU4_AD  | 13 | 7  | 7  | 44,299,564 | 77,157      | 7p13     | 7p22.3   |
| LU18_L  | 3  | 7  | 7  | 44,303,801 | 44,273,117  | 7p13     | 7p13     |
| LU15_L  | 3  | 17 | 17 | 44,323,499 | 30,356,394  | 17q21.31 | 17q11.2  |
| LU8_AD  | 10 | 1  | 1  | 44,342,727 | 44,312,571  | 1p34.1   | 1p34.1   |
| LU8_L   | 8  | 1  | 1  | 44,343,936 | 44,313,500  | 1p34.1   | 1p34.1   |
| LU12_AD | 3  | 18 | 12 | 44,355,424 | 74,254,366  | 18q21.1  | 12q21.1  |
| LU21_AD | 3  | 11 | 11 | 44,370,979 | 44,410,101  | 11p11.2  | 11p11.2  |
| LU18_L  | 3  | 17 | 17 | 44,373,907 | 30,345,842  | 17q21.31 | 17q11.2  |
| LU20_AD | 3  | 17 | 17 | 44,403,130 | 30,370,638  | 17q21.31 | 17q11.2  |
| LU21_AD | 3  | 11 | 11 | 44,410,101 | 44,370,979  | 11p11.2  | 11p11.2  |
| LU16_AD | 27 | 9  | 9  | 44,414,232 | 8,383,159   | 9p11.2   | 9p24.1   |
| LU16_AD | 22 | 9  | 9  | 44,423,046 | 17,614,314  | 9p11.2   | 9p22.2   |
| LU16_L  | 4  | 19 | 19 | 44,529,936 | 44,565,835  | 19q13.31 | 19q13.31 |
| LU16_L  | 4  | 19 | 19 | 44,565,835 | 44,529,936  | 19q13.31 | 19q13.31 |
| LU4_AD  | 3  | 20 | 20 | 44,631,345 | 44,667,717  | 20q13.12 | 20q13.12 |
| LU4_AD  | 3  | 20 | 20 | 44,667,717 | 44,631,345  | 20q13.12 | 20q13.12 |
| LU3_AD  | 3  | 12 | 12 | 44,712,653 | 41,913,343  | 12q12    | 12q12    |
| LU4_AD  | 4  | 20 | 20 | 44,813,160 | 44,844,010  | 20q13.12 | 20q13.12 |
| LU15_L  | 8  | 20 | 20 | 44,813,353 | 36,515,507  | 20q13.12 | 20q11.23 |
| LU15_AD | 15 | 20 | 20 | 44,813,783 | 36,515,040  | 20q13.12 | 20q11.23 |
| LU7_L   | 8  | 9  | 12 | 44,843,503 | 52,020,100  | 9p11.2   | 12q13.13 |
| LU4_AD  | 4  | 20 | 20 | 44,844,010 | 44,813,160  | 20q13.12 | 20q13.12 |
| LU4_L   | 3  | 23 | 23 | 44,864,676 | 148,958,930 | Xp11.3   | Xq28     |
| LU18_L  | 3  | 2  | 3  | 44,871,369 | 167,265,523 | 2p21     | 3q26.1   |
| LU11_AD | 3  | 10 | 10 | 44,887,565 | 44,918,533  | 10q11.21 | 10q11.21 |
| LU21_L  | 3  | 9  | 17 | 44,903,714 | 21,874,415  | 9p11.2   | 17p11.2  |
| LU18_L  | 9  | 19 | 5  | 44,913,952 | 2,640,292   | 19q13.31 | 5p15.33  |
| LU18_AD | 10 | 19 | 5  | 44,913,976 | 2,640,505   | 19q13.31 | 5p15.33  |
| LU11_AD | 3  | 10 | 10 | 44,918,533 | 44,887,565  | 10q11.21 | 10q11.21 |
| LU5_L   | 4  | 15 | 15 | 44,949,063 | 45,004,388  | 15q21.1  | 15q21.1  |
| LU16_AD | 5  | 9  | 9  | 44,975,435 | 25,768,848  | 9p11.2   | 9p21.2   |
| LU5_L   | 4  | 15 | 15 | 45,004,388 | 44,949,063  | 15q21.1  | 15q21.1  |
| LU7_L   | 4  | 9  | 12 | 45,027,525 | 51,220,261  | 9p11.2   | 12q13.12 |
| LU7_AD  | 5  | 9  | 12 | 45,030,110 | 51,218,276  | 9p11.2   | 12q13.12 |
| LU4_L   | 3  | 4  | 10 | 45,032,643 | 91,752,114  | 4p12     | 10q23.31 |
| LU18_L  | 3  | 4  | 6  | 45,046,673 | 29,847,149  | 4p12     | 6p22.1   |
| LU12_L  | 4  | 4  | 4  | 45,049,137 | 92,099,636  | 4p12     | 4q22.1   |

|         |    |    |    |            |             |          |          |
|---------|----|----|----|------------|-------------|----------|----------|
| LU7_L   | 4  | 9  | 4  | 45,057,008 | 185,487,713 | 9p11.2   | 4q35.1   |
| LU12_L  | 3  | 9  | 4  | 45,061,151 | 185,479,391 | 9p11.2   | 4q35.1   |
| LU8_AD  | 3  | 23 | 23 | 45,101,677 | 45,131,462  | Xp11.3   | Xp11.3   |
| LU8_AD  | 3  | 23 | 23 | 45,131,462 | 45,101,677  | Xp11.3   | Xp11.3   |
| LU3_L   | 4  | 19 | 2  | 45,135,823 | 20,126,242  | 19q13.31 | 2p24.1   |
| LU4_AD  | 4  | 23 | 23 | 45,203,105 | 45,243,341  | Xp11.3   | Xp11.3   |
| LU20_AD | 4  | 12 | 8  | 45,206,082 | 37,367,076  | 12q12    | 8p11.23  |
| LU3_L   | 3  | 6  | 6  | 45,240,043 | 83,424,431  | 6p21.1   | 6q14.1   |
| LU4_AD  | 4  | 23 | 23 | 45,243,341 | 45,203,105  | Xp11.3   | Xp11.3   |
| LU3_AD  | 3  | 12 | 12 | 45,264,102 | 43,821,179  | 12q12    | 12q12    |
| LU20_AD | 5  | 7  | 7  | 45,287,544 | 45,317,830  | 7p13     | 7p13     |
| LU20_AD | 5  | 7  | 7  | 45,317,830 | 45,287,544  | 7p13     | 7p13     |
| LU4_AD  | 3  | 7  | 5  | 45,361,843 | 167,934,106 | 7p13     | 5q34     |
| LU12_L  | 3  | 10 | 10 | 45,380,672 | 45,411,749  | 10q11.21 | 10q11.21 |
| LU21_AD | 3  | 17 | 17 | 45,408,770 | 45,444,590  | 17q21.32 | 17q21.32 |
| LU12_L  | 3  | 10 | 10 | 45,411,749 | 45,380,672  | 10q11.21 | 10q11.21 |
| LU18_L  | 3  | 9  | 7  | 45,428,097 | 57,897,363  | 9p11.2   | 7p11.2   |
| LU21_AD | 3  | 17 | 17 | 45,444,590 | 45,408,770  | 17q21.32 | 17q21.32 |
| LU6_L   | 11 | 19 | 19 | 45,487,346 | 49,570,861  | 19q13.32 | 19q13.33 |
| LU18_AD | 6  | 6  | 6  | 45,495,953 | 45,673,491  | 6p21.1   | 6p21.1   |
| LU18_L  | 9  | 6  | 6  | 45,496,387 | 45,673,156  | 6p21.1   | 6p21.1   |
| LU4_L   | 5  | 9  | 9  | 45,516,647 | 42,111,491  | 9p11.2   | 9p12     |
| LU15_L  | 3  | 6  | 6  | 45,545,714 | 45,580,152  | 6p21.1   | 6p21.1   |
| LU20_AD | 4  | 12 | 5  | 45,548,544 | 135,107,757 | 12q12    | 5q31.1   |
| LU4_AD  | 3  | 13 | 13 | 45,549,335 | 45,580,347  | 13q14.12 | 13q14.12 |
| LU15_L  | 3  | 6  | 6  | 45,580,152 | 45,545,714  | 6p21.1   | 6p21.1   |
| LU4_AD  | 3  | 13 | 13 | 45,580,347 | 45,549,335  | 13q14.12 | 13q14.12 |
| LU16_AD | 3  | 9  | 9  | 45,634,869 | 68,672,447  | 9p11.2   | 9q13     |
| LU3_AD  | 3  | 12 | 12 | 45,663,346 | 19,349,871  | 12q12    | 12p12.3  |
| LU18_L  | 9  | 6  | 6  | 45,673,156 | 45,496,387  | 6p21.1   | 6p21.1   |
| LU18_AD | 6  | 6  | 6  | 45,673,491 | 45,495,953  | 6p21.1   | 6p21.1   |
| LU3_AD  | 3  | 6  | 6  | 45,687,642 | 45,719,194  | 6p21.1   | 6p21.1   |
| LU16_AD | 6  | 9  | 9  | 45,692,675 | 25,562,915  | 9p11.2   | 9p21.3   |
| LU3_AD  | 3  | 6  | 6  | 45,719,194 | 45,687,642  | 6p21.1   | 6p21.1   |
| LU20_AD | 7  | 20 | 4  | 45,743,129 | 32,217,014  | 20q13.12 | 4p15.1   |
| LU21_AD | 4  | 7  | 7  | 45,785,045 | 42,630,786  | 7p12.3   | 7p14.1   |
| LU16_AD | 3  | 12 | 12 | 45,837,551 | 45,870,149  | 12q12    | 12q12    |
| LU3_L   | 4  | 18 | 18 | 45,847,551 | 45,903,081  | 18q21.1  | 18q21.1  |
| LU16_AD | 3  | 12 | 12 | 45,870,149 | 45,837,551  | 12q12    | 12q12    |
| LU3_L   | 4  | 18 | 18 | 45,903,081 | 45,847,551  | 18q21.1  | 18q21.1  |
| LU7_L   | 5  | 7  | 12 | 45,912,065 | 20,643,026  | 7p12.3   | 12p12.2  |
| LU7_AD  | 3  | 7  | 12 | 46,009,678 | 55,529,850  | 7p12.3   | 12q13.2  |
| LU16_L  | 5  | 7  | 5  | 46,079,607 | 1,796,862   | 7p12.3   | 5p15.33  |
| LU16_AD | 40 | 7  | 5  | 46,079,623 | 1,792,205   | 7p12.3   | 5p15.33  |

|         |    |    |    |            |             |          |          |
|---------|----|----|----|------------|-------------|----------|----------|
| LU16_L  | 6  | 7  | 7  | 46,079,925 | 15,749,588  | 7p12.3   | 7p21.2   |
| LU16_AD | 32 | 7  | 7  | 46,079,970 | 15,749,119  | 7p12.3   | 7p21.2   |
| LU14_AD | 4  | 7  | 2  | 46,085,278 | 20,125,036  | 7p12.3   | 2p24.1   |
| LU3_AD  | 3  | 12 | 12 | 46,088,835 | 19,836,183  | 12q12    | 12p12.3  |
| LU3_L   | 3  | 3  | 19 | 46,091,684 | 52,309,928  | 3p21.31  | 19q13.41 |
| LU15_L  | 3  | 3  | 14 | 46,092,853 | 70,280,671  | 3p21.31  | 14q24.2  |
| LU3_AD  | 3  | 7  | 7  | 46,133,174 | 46,170,210  | 7p12.3   | 7p12.3   |
| LU20_AD | 4  | 17 | 9  | 46,138,314 | 125,720,358 | 17q21.32 | 9q33.2   |
| LU4_AD  | 17 | 7  | 7  | 46,156,481 | 38,698,996  | 7p12.3   | 7p14.1   |
| LU21_AD | 5  | 9  | 20 | 46,162,525 | 29,563,633  | 9p11.2   | 20q11.21 |
| LU7_AD  | 3  | 9  | 9  | 46,163,463 | 67,741,933  | 9p11.2   | 9q13     |
| LU3_AD  | 3  | 7  | 7  | 46,170,210 | 46,133,174  | 7p12.3   | 7p12.3   |
| LU16_AD | 7  | 7  | 25 | 46,172,132 | 3,265,222   | 7p12.3   | 25       |
| LU16_AD | 3  | 14 | 13 | 46,182,627 | 38,133,246  | 14q21.2  | 13q13.3  |
| LU20_AD | 4  | 1  | 1  | 46,219,510 | 52,679,992  | 1p34.1   | 1p32.3   |
| LU15_L  | 3  | 4  | 2  | 46,298,054 | 156,781,621 | 4p12     | 2q24.1   |
| LU18_L  | 3  | 5  | 4  | 46,339,539 | 190,819,555 | 5p11     | 4q35.2   |
| LU20_L  | 3  | 15 | 15 | 46,371,160 | 46,410,752  | 15q21.1  | 15q21.1  |
| LU20_AD | 4  | 16 | 5  | 46,390,711 | 64,481,974  | 16q11.2  | 5q12.3   |
| LU20_L  | 3  | 15 | 15 | 46,410,752 | 46,371,160  | 15q21.1  | 15q21.1  |
| LU3_AD  | 4  | 20 | 20 | 46,439,705 | 47,158,148  | 20q13.13 | 20q13.13 |
| LU3_AD  | 3  | 9  | 9  | 46,451,499 | 42,025,150  | 9p11.2   | 9p12     |
| LU8_AD  | 4  | 16 | 10 | 46,463,252 | 38,567,192  | 16q11.2  | 10p11.1  |
| LU3_L   | 3  | 3  | 11 | 46,469,829 | 112,798,588 | 3p21.31  | 11q23.2  |
| LU5_L   | 5  | 10 | 10 | 46,476,941 | 48,625,236  | 10q11.22 | 10q11.22 |
| LU21_L  | 3  | 10 | 10 | 46,486,056 | 46,518,724  | 10q11.22 | 10q11.22 |
| LU21_L  | 3  | 10 | 10 | 46,518,724 | 46,486,056  | 10q11.22 | 10q11.22 |
| LU4_AD  | 6  | 16 | 16 | 46,533,444 | 64,549,760  | 16q11.2  | 16q21    |
| LU3_L   | 3  | 7  | 7  | 46,654,966 | 46,685,869  | 7p12.3   | 7p12.3   |
| LU3_L   | 3  | 7  | 7  | 46,685,869 | 46,654,966  | 7p12.3   | 7p12.3   |
| LU5_AD  | 8  | 19 | 19 | 46,690,095 | 46,780,634  | 19q13.32 | 19q13.32 |
| LU16_AD | 5  | 9  | 9  | 46,709,995 | 12,289,989  | 9p11.2   | 9p23     |
| LU11_AD | 3  | 6  | 6  | 46,778,761 | 46,830,800  | 6p12.3   | 6p12.3   |
| LU5_AD  | 8  | 19 | 19 | 46,780,634 | 46,690,095  | 19q13.32 | 19q13.32 |
| LU11_AD | 3  | 6  | 6  | 46,830,800 | 46,778,761  | 6p12.3   | 6p12.3   |
| LU15_L  | 3  | 20 | 20 | 46,860,769 | 35,286,962  | 20q13.13 | 20q11.23 |
| LU15_AD | 8  | 20 | 20 | 46,863,426 | 35,284,537  | 20q13.13 | 20q11.23 |
| LU4_L   | 3  | 16 | 16 | 46,887,821 | 64,529,049  | 16q11.2  | 16q21    |
| LU14_L  | 3  | 9  | 9  | 46,903,495 | 65,968,946  | 9p11.2   | 9q13     |
| LU3_AD  | 5  | 12 | 5  | 46,950,712 | 176,689,789 | 12q13.11 | 5q35.3   |
| LU20_L  | 3  | 10 | 10 | 46,961,257 | 81,454,773  | 10q11.22 | 10q22.3  |
| LU18_AD | 8  | 15 | 5  | 46,973,072 | 741,481     | 15q21.1  | 5p15.33  |
| LU18_L  | 5  | 15 | 5  | 46,973,575 | 743,212     | 15q21.1  | 5p15.33  |
| LU12_L  | 14 | 8  | 8  | 46,977,931 | 128,618,949 | 8q11.1   | 8q24.21  |

|         |    |    |    |            |             |          |          |
|---------|----|----|----|------------|-------------|----------|----------|
| LU7_AD  | 4  | 2  | 6  | 46,984,013 | 113,545,109 | 2p21     | 6q21     |
| LU8_L   | 3  | 2  | 6  | 46,985,656 | 113,543,482 | 2p21     | 6q21     |
| LU8_L   | 3  | 10 | 10 | 47,024,710 | 47,081,292  | 10q11.22 | 10q11.22 |
| LU21_L  | 3  | 10 | 10 | 47,030,975 | 47,085,636  | 10q11.22 | 10q11.22 |
| LU3_AD  | 6  | 12 | 12 | 47,030,982 | 29,469,258  | 12q13.11 | 12p11.22 |
| LU8_L   | 3  | 10 | 10 | 47,081,292 | 47,024,710  | 10q11.22 | 10q11.22 |
| LU21_L  | 3  | 10 | 10 | 47,085,636 | 47,030,975  | 10q11.22 | 10q11.22 |
| LU3_AD  | 4  | 12 | 12 | 47,088,900 | 63,492,744  | 12q13.11 | 12q14.2  |
| LU3_AD  | 4  | 12 | 12 | 47,113,140 | 58,427,110  | 12q13.11 | 12q14.1  |
| LU12_AD | 3  | 10 | 10 | 47,121,455 | 49,196,425  | 10q11.22 | 10q11.22 |
| LU3_AD  | 4  | 20 | 20 | 47,158,148 | 46,439,705  | 20q13.13 | 20q13.13 |
| LU18_L  | 3  | 8  | 5  | 47,191,805 | 1,585,090   | 8q11.1   | 5p15.33  |
| LU18_AD | 5  | 15 | 11 | 47,256,998 | 17,975,967  | 15q21.1  | 11p15.1  |
| LU18_L  | 8  | 15 | 11 | 47,257,266 | 17,975,285  | 15q21.1  | 11p15.1  |
| LU20_AD | 3  | 2  | 12 | 47,329,949 | 1,823,755   | 2p21     | 12p13.33 |
| LU12_AD | 9  | 1  | 8  | 47,370,444 | 53,859,848  | 1p33     | 8q11.23  |
| LU3_AD  | 4  | 12 | 12 | 47,476,587 | 19,901,070  | 12q13.11 | 12p12.3  |
| LU11_AD | 9  | 1  | 1  | 47,595,051 | 26,330,239  | 1p33     | 1p36.11  |
| LU11_AD | 6  | 1  | 1  | 47,596,788 | 109,815,215 | 1p33     | 1p13.3   |
| LU11_L  | 4  | 1  | 1  | 47,596,966 | 109,815,591 | 1p33     | 1p13.3   |
| LU15_AD | 3  | 6  | 3  | 47,611,794 | 161,766,191 | 6p12.3   | 3q26.1   |
| LU20_AD | 3  | 6  | 4  | 47,612,151 | 72,506,385  | 6p12.3   | 4q13.3   |
| LU3_AD  | 3  | 16 | 16 | 47,639,685 | 47,673,215  | 16q12.1  | 16q12.1  |
| LU12_L  | 12 | 8  | 8  | 47,667,475 | 97,215,775  | 8q11.1   | 8q22.1   |
| LU3_AD  | 3  | 16 | 16 | 47,673,215 | 47,639,685  | 16q12.1  | 16q12.1  |
| LU20_AD | 3  | 6  | 6  | 47,673,596 | 47,704,888  | 6p12.3   | 6p12.3   |
| LU11_AD | 43 | 12 | 12 | 47,699,061 | 48,705,166  | 12q13.11 | 12q13.11 |
| LU11_L  | 23 | 12 | 12 | 47,699,602 | 48,704,454  | 12q13.11 | 12q13.11 |
| LU14_L  | 3  | 6  | 6  | 47,700,471 | 47,733,534  | 6p12.3   | 6p12.3   |
| LU20_AD | 3  | 6  | 6  | 47,704,888 | 47,673,596  | 6p12.3   | 6p12.3   |
| LU7_L   | 3  | 7  | 12 | 47,721,792 | 23,368,682  | 7p12.3   | 12p12.1  |
| LU14_L  | 3  | 6  | 6  | 47,733,534 | 47,700,471  | 6p12.3   | 6p12.3   |
| LU15_L  | 12 | 20 | 20 | 47,734,708 | 36,554,906  | 20q13.13 | 20q11.23 |
| LU15_AD | 31 | 20 | 20 | 47,734,878 | 36,550,062  | 20q13.13 | 20q11.23 |
| LU4_AD  | 12 | 16 | 16 | 47,752,692 | 47,826,124  | 16q12.1  | 16q12.1  |
| LU4_L   | 14 | 16 | 16 | 47,753,176 | 47,827,245  | 16q12.1  | 16q12.1  |
| LU4_L   | 4  | 2  | 22 | 47,811,979 | 24,198,454  | 2p16.3   | 22q11.23 |
| LU12_L  | 3  | 2  | 1  | 47,812,574 | 38,378,970  | 2p16.3   | 1p34.3   |
| LU4_AD  | 12 | 16 | 16 | 47,826,124 | 47,752,692  | 16q12.1  | 16q12.1  |
| LU4_L   | 14 | 16 | 16 | 47,827,245 | 47,753,176  | 16q12.1  | 16q12.1  |
| LU21_L  | 3  | 12 | 1  | 47,840,051 | 143,489,883 | 12q13.11 | 1q21.1   |
| LU11_L  | 8  | 12 | 12 | 47,846,431 | 107,153,347 | 12q13.11 | 12q23.3  |
| LU7_L   | 10 | 7  | 7  | 47,882,638 | 6,071,948   | 7p12.3   | 7p22.1   |
| LU7_AD  | 4  | 7  | 7  | 47,883,554 | 6,070,836   | 7p12.3   | 7p22.1   |

|         |    |    |    |            |             |          |          |
|---------|----|----|----|------------|-------------|----------|----------|
| LU12_L  | 5  | 16 | 16 | 47,905,180 | 48,011,654  | 16q12.1  | 16q12.1  |
| LU12_L  | 19 | 16 | 16 | 47,908,201 | 54,265,847  | 16q12.1  | 16q12.2  |
| LU12_L  | 5  | 16 | 21 | 47,916,652 | 10,096,033  | 16q12.1  | 21p11.2  |
| LU12_L  | 5  | 16 | 1  | 47,917,269 | 142,550,227 | 16q12.1  | 1q12     |
| LU18_L  | 3  | 18 | 3  | 47,974,247 | 96,386,150  | 18q21.1  | 3q11.2   |
| LU18_AD | 3  | 22 | 2  | 47,977,654 | 89,019,239  | 22q13.31 | 2p11.2   |
| LU3_L   | 3  | 18 | 18 | 47,980,534 | 48,013,591  | 18q21.1  | 18q21.1  |
| LU12_L  | 5  | 16 | 16 | 48,011,654 | 47,905,180  | 16q12.1  | 16q12.1  |
| LU3_L   | 3  | 18 | 18 | 48,013,591 | 47,980,534  | 18q21.1  | 18q21.1  |
| LU15_AD | 6  | 20 | 20 | 48,038,739 | 49,690,629  | 20q13.13 | 20q13.13 |
| LU15_AD | 6  | 20 | 20 | 48,039,130 | 50,359,387  | 20q13.13 | 20q13.2  |
| LU20_AD | 4  | 6  | 1  | 48,116,548 | 113,993,045 | 6p12.3   | 1p13.2   |
| LU7_L   | 3  | 14 | 14 | 48,123,611 | 48,155,375  | 14q21.3  | 14q21.3  |
| LU4_AD  | 8  | 1  | 16 | 48,145,042 | 63,708,924  | 1p33     | 16q21    |
| LU7_L   | 3  | 14 | 14 | 48,155,375 | 48,123,611  | 14q21.3  | 14q21.3  |
| LU18_L  | 3  | 18 | 18 | 48,175,057 | 48,228,653  | 18q21.1  | 18q21.2  |
| LU18_L  | 3  | 18 | 18 | 48,228,653 | 48,175,057  | 18q21.2  | 18q21.1  |
| LU16_AD | 18 | 14 | 21 | 48,235,362 | 9,827,915   | 14q21.3  | 21p11.2  |
| LU4_AD  | 3  | 6  | 6  | 48,244,295 | 48,274,264  | 6p12.3   | 6p12.3   |
| LU15_L  | 3  | 3  | 6  | 48,252,194 | 145,015,880 | 3p21.31  | 6q24.2   |
| LU4_AD  | 3  | 6  | 6  | 48,274,264 | 48,244,295  | 6p12.3   | 6p12.3   |
| LU6_L   | 3  | 2  | 2  | 48,283,063 | 48,322,910  | 2p16.3   | 2p16.3   |
| LU4_AD  | 14 | 1  | 1  | 48,313,516 | 231,205     | 1p33     | 1p36.33  |
| LU4_AD  | 13 | 1  | 11 | 48,314,688 | 191,196     | 1p33     | 11p15.5  |
| LU4_L   | 10 | 1  | 11 | 48,314,716 | 191,492     | 1p33     | 11p15.5  |
| LU4_AD  | 5  | 1  | 6  | 48,315,482 | 149,281     | 1p33     | 6p25.3   |
| LU4_AD  | 3  | 1  | 4  | 48,315,958 | 12,626      | 1p33     | 4p16.3   |
| LU6_L   | 3  | 2  | 2  | 48,322,910 | 48,283,063  | 2p16.3   | 2p16.3   |
| LU7_L   | 3  | 7  | 7  | 48,326,532 | 23,024,083  | 7p12.3   | 7p15.3   |
| LU7_AD  | 3  | 7  | 7  | 48,327,488 | 23,024,715  | 7p12.3   | 7p15.3   |
| LU11_AD | 39 | 12 | 12 | 48,349,923 | 48,700,977  | 12q13.11 | 12q13.11 |
| LU11_L  | 19 | 12 | 12 | 48,350,462 | 48,700,880  | 12q13.11 | 12q13.11 |
| LU7_AD  | 3  | 3  | 3  | 48,372,957 | 38,338,362  | 3p21.31  | 3p22.2   |
| LU21_AD | 3  | 7  | 7  | 48,394,239 | 48,430,812  | 7p12.3   | 7p12.3   |
| LU11_L  | 5  | 12 | 12 | 48,430,144 | 56,225,220  | 12q13.11 | 12q13.2  |
| LU21_AD | 3  | 7  | 7  | 48,430,812 | 48,394,239  | 7p12.3   | 7p12.3   |
| LU11_AD | 32 | 12 | 12 | 48,481,534 | 58,141,149  | 12q13.11 | 12q14.1  |
| LU11_L  | 24 | 12 | 12 | 48,482,618 | 58,139,664  | 12q13.11 | 12q14.1  |
| LU4_AD  | 3  | 17 | 7  | 48,490,167 | 30,847,188  | 17q21.33 | 7p14.3   |
| LU11_AD | 11 | 12 | 12 | 48,514,791 | 117,347,411 | 12q13.11 | 12q24.22 |
| LU11_L  | 33 | 12 | 12 | 48,518,048 | 49,676,046  | 12q13.11 | 12q13.12 |
| LU11_AD | 53 | 12 | 12 | 48,520,189 | 68,370,243  | 12q13.11 | 12q15    |
| LU11_L  | 29 | 12 | 12 | 48,523,556 | 68,370,125  | 12q13.11 | 12q15    |
| LU11_AD | 38 | 12 | 12 | 48,524,585 | 49,676,045  | 12q13.11 | 12q13.12 |

|         |    |    |    |            |             |          |          |
|---------|----|----|----|------------|-------------|----------|----------|
| LU7_L   | 4  | 2  | 19 | 48,613,412 | 21,595,352  | 2p16.3   | 19p12    |
| LU4_AD  | 4  | 16 | 16 | 48,620,542 | 48,954,485  | 16q12.1  | 16q12.1  |
| LU5_L   | 5  | 10 | 10 | 48,625,236 | 46,476,941  | 10q11.22 | 10q11.22 |
| LU18_L  | 3  | 13 | 12 | 48,631,394 | 68,168,031  | 13q14.2  | 12q15    |
| LU3_AD  | 3  | 1  | 1  | 48,646,835 | 48,685,050  | 1p33     | 1p33     |
| LU18_AD | 4  | 1  | 1  | 48,672,298 | 48,705,688  | 1p33     | 1p33     |
| LU11_AD | 15 | 12 | 12 | 48,674,703 | 115,608,000 | 12q13.11 | 12q24.21 |
| LU11_AD | 13 | 12 | 18 | 48,674,803 | 36,557,635  | 12q13.11 | 18q12.2  |
| LU11_L  | 4  | 12 | 12 | 48,675,419 | 115,609,584 | 12q13.11 | 12q24.21 |
| LU4_AD  | 12 | 16 | 16 | 48,679,178 | 69,460,661  | 16q12.1  | 16q22.1  |
| LU18_AD | 4  | 1  | 1  | 48,680,912 | 83,421,971  | 1p33     | 1p31.1   |
| LU4_L   | 5  | 16 | 16 | 48,681,325 | 69,458,531  | 16q12.1  | 16q22.1  |
| LU4_L   | 4  | 16 | 16 | 48,683,029 | 69,405,863  | 16q12.1  | 16q22.1  |
| LU3_AD  | 3  | 1  | 1  | 48,685,050 | 48,646,835  | 1p33     | 1p33     |
| LU4_AD  | 7  | 16 | 16 | 48,685,620 | 69,405,008  | 16q12.1  | 16q22.1  |
| LU4_L   | 3  | 1  | 1  | 48,695,621 | 153,077,404 | 1p33     | 1q21.3   |
| LU4_AD  | 4  | 1  | 1  | 48,696,108 | 153,077,291 | 1p33     | 1q21.3   |
| LU11_L  | 19 | 12 | 12 | 48,700,880 | 48,350,462  | 12q13.11 | 12q13.11 |
| LU11_AD | 39 | 12 | 12 | 48,700,977 | 48,349,923  | 12q13.11 | 12q13.11 |
| LU11_L  | 23 | 12 | 12 | 48,704,454 | 47,699,602  | 12q13.11 | 12q13.11 |
| LU11_AD | 43 | 12 | 12 | 48,705,166 | 47,699,061  | 12q13.11 | 12q13.11 |
| LU18_AD | 4  | 1  | 1  | 48,705,688 | 48,672,298  | 1p33     | 1p33     |
| LU7_L   | 6  | 7  | 7  | 48,707,134 | 37,209,780  | 7p12.3   | 7p14.1   |
| LU11_L  | 7  | 12 | 18 | 48,709,623 | 35,821,655  | 12q13.11 | 18q12.2  |
| LU11_L  | 9  | 12 | 12 | 48,709,850 | 68,838,130  | 12q13.11 | 12q15    |
| LU11_AD | 4  | 12 | 12 | 48,709,983 | 68,839,632  | 12q13.11 | 12q15    |
| LU18_AD | 3  | 23 | 12 | 48,712,580 | 68,934,875  | Xp11.23  | 12q15    |
| LU15_L  | 3  | 22 | 22 | 48,712,856 | 48,751,508  | 22q13.32 | 22q13.32 |
| LU4_AD  | 21 | 16 | 1  | 48,714,539 | 49,015,314  | 16q12.1  | 1p33     |
| LU4_L   | 18 | 16 | 1  | 48,714,652 | 49,015,264  | 16q12.1  | 1p33     |
| LU15_L  | 3  | 22 | 22 | 48,751,508 | 48,712,856  | 22q13.32 | 22q13.32 |
| LU11_AD | 70 | 12 | 20 | 48,805,071 | 57,146,778  | 12q13.11 | 20q13.32 |
| LU11_L  | 12 | 12 | 20 | 48,812,023 | 57,150,834  | 12q13.11 | 20q13.32 |
| LU11_L  | 4  | 12 | 12 | 48,818,163 | 69,278,255  | 12q13.11 | 12q15    |
| LU20_AD | 3  | 20 | 20 | 48,825,102 | 48,876,877  | 20q13.13 | 20q13.13 |
| LU3_L   | 3  | 6  | 24 | 48,843,348 | 23,611,791  | 6p12.3   | Yq11.223 |
| LU20_AD | 3  | 20 | 20 | 48,876,877 | 48,825,102  | 20q13.13 | 20q13.13 |
| LU11_L  | 7  | 12 | 12 | 48,895,287 | 62,157,367  | 12q13.11 | 12q14.1  |
| LU12_L  | 3  | 1  | 8  | 48,905,436 | 49,151,963  | 1p33     | 8q11.21  |
| LU5_AD  | 4  | 1  | 10 | 48,905,454 | 10,331,587  | 1p33     | 10p14    |
| LU3_L   | 4  | 15 | 3  | 48,912,098 | 181,701,984 | 15q21.1  | 3q26.33  |
| LU4_AD  | 4  | 16 | 16 | 48,954,485 | 48,620,542  | 16q12.1  | 16q12.1  |
| LU4_AD  | 4  | 1  | 3  | 48,981,343 | 102,932,054 | 1p33     | 3q13.11  |
| LU4_AD  | 4  | 11 | 5  | 48,989,828 | 10,650,362  | 11p11.12 | 5p15.2   |

|         |    |    |    |            |             |          |          |
|---------|----|----|----|------------|-------------|----------|----------|
| LU14_L  | 3  | 1  | 1  | 48,993,458 | 49,026,621  | 1p33     | 1p33     |
| LU4_AD  | 8  | 16 | 16 | 49,004,642 | 64,697,759  | 16q12.1  | 16q21    |
| LU4_L   | 5  | 16 | 16 | 49,004,951 | 64,698,082  | 16q12.1  | 16q21    |
| LU4_L   | 18 | 1  | 16 | 49,015,264 | 48,714,652  | 1p33     | 16q12.1  |
| LU4_AD  | 21 | 1  | 16 | 49,015,314 | 48,714,539  | 1p33     | 16q12.1  |
| LU5_L   | 3  | 14 | 11 | 49,024,812 | 92,996,807  | 14q21.3  | 11q21    |
| LU14_L  | 3  | 1  | 1  | 49,026,621 | 48,993,458  | 1p33     | 1p33     |
| LU15_L  | 3  | 8  | 8  | 49,059,123 | 49,098,515  | 8q11.21  | 8q11.21  |
| LU4_AD  | 11 | 16 | 1  | 49,059,323 | 22,585,551  | 16q12.1  | 1p36.12  |
| LU15_L  | 3  | 8  | 8  | 49,098,515 | 49,059,123  | 8q11.21  | 8q11.21  |
| LU7_L   | 14 | 12 | 12 | 49,110,651 | 71,086,119  | 12q13.12 | 12q15    |
| LU7_L   | 16 | 12 | 12 | 49,111,352 | 51,073,817  | 12q13.12 | 12q13.12 |
| LU7_AD  | 17 | 12 | 12 | 49,112,308 | 51,073,613  | 12q13.12 | 12q13.12 |
| LU7_AD  | 5  | 12 | 12 | 49,112,489 | 71,086,752  | 12q13.12 | 12q15    |
| LU4_AD  | 5  | 16 | 16 | 49,126,168 | 60,247,880  | 16q12.1  | 16q21    |
| LU4_L   | 9  | 16 | 16 | 49,126,661 | 60,248,294  | 16q12.1  | 16q21    |
| LU3_AD  | 3  | 18 | 18 | 49,128,529 | 49,163,014  | 18q21.2  | 18q21.2  |
| LU18_AD | 4  | 23 | 23 | 49,146,945 | 53,021,176  | Xp11.23  | Xp11.22  |
| LU12_L  | 3  | 8  | 1  | 49,151,963 | 48,905,436  | 8q11.21  | 1p33     |
| LU3_AD  | 3  | 18 | 18 | 49,163,014 | 49,128,529  | 18q21.2  | 18q21.2  |
| LU12_AD | 3  | 10 | 10 | 49,196,425 | 47,121,455  | 10q11.22 | 10q11.22 |
| LU18_AD | 23 | 4  | 5  | 49,311,102 | 2,640,891   | 4p11     | 5p15.33  |
| LU18_L  | 28 | 4  | 5  | 49,312,237 | 2,639,660   | 4p11     | 5p15.33  |
| LU16_AD | 4  | 4  | 5  | 49,312,439 | 6,303,511   | 4p11     | 5p15.31  |
| LU16_L  | 7  | 4  | 5  | 49,312,658 | 6,305,529   | 4p11     | 5p15.31  |
| LU18_AD | 3  | 4  | 12 | 49,315,254 | 65,185,229  | 4p11     | 12q14.3  |
| LU3_AD  | 3  | 12 | 12 | 49,372,568 | 56,022,699  | 12q13.12 | 12q13.2  |
| LU3_L   | 3  | 7  | 7  | 49,382,619 | 49,422,570  | 7p12.2   | 7p12.2   |
| LU3_L   | 3  | 7  | 7  | 49,422,570 | 49,382,619  | 7p12.2   | 7p12.2   |
| LU4_L   | 3  | 13 | 1  | 49,441,751 | 210,365,506 | 13q14.2  | 1q32.2   |
| LU3_AD  | 3  | 6  | 1  | 49,470,742 | 242,621,779 | 6p12.3   | 1q43     |
| LU18_AD | 3  | 4  | 5  | 49,491,069 | 1,206,987   | 4p11     | 5p15.33  |
| LU18_L  | 8  | 4  | 5  | 49,515,019 | 2,641,303   | 4p11     | 5p15.33  |
| LU16_AD | 4  | 4  | 5  | 49,515,707 | 6,306,149   | 4p11     | 5p15.31  |
| LU18_AD | 6  | 4  | 5  | 49,516,834 | 2,639,746   | 4p11     | 5p15.33  |
| LU11_L  | 5  | 12 | 12 | 49,517,782 | 62,225,898  | 12q13.12 | 12q14.1  |
| LU11_AD | 6  | 12 | 12 | 49,558,197 | 112,075,877 | 12q13.12 | 12q24.12 |
| LU6_L   | 11 | 19 | 19 | 49,570,861 | 45,487,346  | 19q13.33 | 19q13.32 |
| LU14_AD | 6  | 12 | 12 | 49,644,589 | 60,732,060  | 12q13.12 | 12q14.1  |
| LU11_L  | 14 | 12 | 12 | 49,675,875 | 68,369,882  | 12q13.12 | 12q15    |
| LU11_AD | 21 | 12 | 12 | 49,676,016 | 68,370,816  | 12q13.12 | 12q15    |
| LU11_AD | 38 | 12 | 12 | 49,676,045 | 48,524,585  | 12q13.12 | 12q13.11 |
| LU11_L  | 33 | 12 | 12 | 49,676,046 | 48,518,048  | 12q13.12 | 12q13.11 |
| LU15_AD | 6  | 20 | 20 | 49,690,629 | 48,038,739  | 20q13.13 | 20q13.13 |



|         |    |    |    |            |             |          |          |
|---------|----|----|----|------------|-------------|----------|----------|
| LU3_L   | 3  | 3  | 1  | 49,728,243 | 16,925,906  | 3p21.31  | 1p36.13  |
| LU7_AD  | 7  | 12 | 12 | 49,734,221 | 64,507,788  | 12q13.12 | 12q14.2  |
| LU7_L   | 7  | 12 | 12 | 49,736,022 | 64,506,625  | 12q13.12 | 12q14.2  |
| LU7_L   | 4  | 12 | 12 | 49,739,903 | 63,070,689  | 12q13.12 | 12q14.1  |
| LU7_L   | 13 | 12 | 12 | 49,749,942 | 56,104,617  | 12q13.12 | 12q13.2  |
| LU7_L   | 3  | 12 | 12 | 49,752,917 | 63,036,316  | 12q13.12 | 12q14.1  |
| LU7_AD  | 6  | 12 | 12 | 49,753,600 | 63,034,237  | 12q13.12 | 12q14.1  |
| LU7_L   | 7  | 12 | 12 | 49,754,782 | 50,913,680  | 12q13.12 | 12q13.12 |
| LU4_L   | 3  | 10 | 10 | 49,789,992 | 49,821,068  | 10q11.22 | 10q11.22 |
| LU4_L   | 3  | 10 | 10 | 49,821,068 | 49,789,992  | 10q11.22 | 10q11.22 |
| LU7_L   | 4  | 12 | 12 | 49,853,001 | 67,961,901  | 12q13.12 | 12q15    |
| LU3_L   | 5  | 14 | 14 | 49,859,338 | 49,895,797  | 14q21.3  | 14q21.3  |
| LU11_AD | 6  | 12 | 12 | 49,867,462 | 58,138,076  | 12q13.12 | 12q14.1  |
| LU11_L  | 17 | 12 | 12 | 49,867,972 | 58,136,937  | 12q13.12 | 12q14.1  |
| LU11_AD | 3  | 8  | 7  | 49,875,838 | 155,034,056 | 8q11.21  | 7q36.2   |
| LU4_AD  | 4  | 8  | 1  | 49,877,071 | 16,432,800  | 8q11.21  | 1p36.13  |
| LU11_L  | 12 | 12 | 12 | 49,881,779 | 112,039,229 | 12q13.12 | 12q24.12 |
| LU11_AD | 7  | 12 | 12 | 49,883,168 | 112,039,336 | 12q13.12 | 12q24.12 |
| LU11_AD | 5  | 13 | 13 | 49,895,627 | 49,936,525  | 13q14.2  | 13q14.2  |
| LU3_L   | 5  | 14 | 14 | 49,895,797 | 49,859,338  | 14q21.3  | 14q21.3  |
| LU11_AD | 5  | 13 | 13 | 49,936,525 | 49,895,627  | 13q14.2  | 13q14.2  |
| LU11_AD | 8  | 16 | 16 | 49,942,212 | 11,779,500  | 16q12.1  | 16p13.13 |
| LU11_AD | 28 | 12 | 12 | 49,960,632 | 58,475,763  | 12q13.12 | 12q14.1  |
| LU11_L  | 28 | 12 | 12 | 49,960,673 | 58,475,695  | 12q13.12 | 12q14.1  |
| LU11_AD | 21 | 12 | 12 | 49,963,749 | 58,142,128  | 12q13.12 | 12q14.1  |
| LU11_L  | 19 | 12 | 12 | 49,965,786 | 112,044,090 | 12q13.12 | 12q24.12 |
| LU11_AD | 5  | 12 | 12 | 49,966,015 | 112,044,939 | 12q13.12 | 12q24.12 |
| LU11_AD | 29 | 12 | 12 | 49,972,040 | 57,618,162  | 12q13.12 | 12q13.3  |
| LU11_L  | 10 | 12 | 12 | 49,972,132 | 57,619,391  | 12q13.12 | 12q13.3  |
| LU11_AD | 9  | 12 | 12 | 49,974,869 | 57,979,742  | 12q13.12 | 12q13.3  |
| LU11_AD | 6  | 12 | 12 | 49,975,265 | 56,417,758  | 12q13.12 | 12q13.2  |
| LU11_L  | 6  | 12 | 12 | 49,976,137 | 57,980,191  | 12q13.12 | 12q13.3  |
| LU11_AD | 21 | 12 | 12 | 49,981,389 | 57,231,053  | 12q13.12 | 12q13.3  |
| LU4_AD  | 4  | 11 | 1  | 50,039,561 | 228,157,113 | 11p11.12 | 1q42.13  |
| LU4_AD  | 3  | 1  | 13 | 50,039,829 | 98,244,370  | 1p33     | 13q32.2  |
| LU15_L  | 4  | 11 | 1  | 50,039,951 | 228,155,932 | 11p11.12 | 1q42.13  |
| LU20_L  | 6  | 11 | 1  | 50,040,118 | 228,153,965 | 11p11.12 | 1q42.13  |
| LU8_L   | 3  | 11 | 1  | 50,041,672 | 228,153,522 | 11p11.12 | 1q42.13  |
| LU3_AD  | 3  | 11 | 1  | 50,042,956 | 228,153,942 | 11p11.12 | 1q42.13  |
| LU4_AD  | 5  | 23 | 1  | 50,074,093 | 227,867,948 | Xp11.22  | 1q42.13  |
| LU20_L  | 3  | 7  | 16 | 50,107,219 | 20,688,590  | 7p12.2   | 16p12.3  |
| LU16_AD | 3  | 7  | 23 | 50,109,580 | 119,283,273 | 7p12.2   | Xq24     |
| LU21_L  | 4  | 12 | 5  | 50,127,924 | 37,777,834  | 12q13.12 | 5p13.2   |
| LU3_AD  | 5  | 12 | 12 | 50,155,877 | 30,777,969  | 12q13.12 | 12p11.21 |

|         |    |    |    |            |             |          |          |
|---------|----|----|----|------------|-------------|----------|----------|
| LU8_L   | 4  | 13 | 1  | 50,225,512 | 97,499,409  | 13q14.2  | 1p21.3   |
| LU7_L   | 10 | 12 | 12 | 50,287,437 | 56,097,178  | 12q13.12 | 12q13.2  |
| LU7_L   | 19 | 12 | 12 | 50,288,851 | 68,138,540  | 12q13.12 | 12q15    |
| LU7_AD  | 7  | 12 | 12 | 50,289,075 | 68,137,906  | 12q13.12 | 12q15    |
| LU7_L   | 8  | 12 | 12 | 50,292,841 | 56,253,309  | 12q13.12 | 12q13.2  |
| LU7_AD  | 11 | 12 | 12 | 50,295,173 | 57,380,081  | 12q13.12 | 12q13.3  |
| LU7_AD  | 5  | 12 | 12 | 50,296,348 | 57,333,866  | 12q13.12 | 12q13.3  |
| LU7_L   | 10 | 12 | 12 | 50,296,493 | 57,333,894  | 12q13.12 | 12q13.3  |
| LU7_L   | 27 | 12 | 12 | 50,298,886 | 57,370,003  | 12q13.12 | 12q13.3  |
| LU4_AD  | 3  | 6  | 6  | 50,341,681 | 50,376,669  | 6p12.3   | 6p12.3   |
| LU15_AD | 6  | 20 | 20 | 50,359,387 | 48,039,130  | 20q13.2  | 20q13.13 |
| LU15_L  | 27 | 5  | 5  | 50,368,533 | 54,195,486  | 5q11.1   | 5q11.2   |
| LU4_AD  | 3  | 6  | 6  | 50,376,669 | 50,341,681  | 6p12.3   | 6p12.3   |
| LU7_L   | 6  | 7  | 7  | 50,448,284 | 50,616,109  | 7p12.2   | 7p12.1   |
| LU7_L   | 4  | 7  | 12 | 50,449,946 | 61,868,602  | 7p12.2   | 12q14.1  |
| LU7_L   | 7  | 12 | 12 | 50,471,028 | 60,194,731  | 12q13.12 | 12q14.1  |
| LU12_L  | 17 | 8  | 8  | 50,500,555 | 108,277,422 | 8q11.21  | 8q23.1   |
| LU4_AD  | 12 | 16 | 16 | 50,547,334 | 56,228,497  | 16q12.1  | 16q12.2  |
| LU6_L   | 9  | 14 | 12 | 50,557,306 | 69,079,182  | 14q21.3  | 12q15    |
| LU14_L  | 3  | 8  | 10 | 50,564,649 | 22,432,368  | 8q11.21  | 10p12.31 |
| LU7_L   | 5  | 12 | 12 | 50,567,351 | 63,037,541  | 12q13.12 | 12q14.1  |
| LU11_AD | 6  | 12 | 12 | 50,589,424 | 67,983,494  | 12q13.12 | 12q15    |
| LU7_L   | 6  | 7  | 7  | 50,616,109 | 50,448,284  | 7p12.1   | 7p12.2   |
| LU7_L   | 5  | 12 | 12 | 50,661,760 | 50,904,315  | 12q13.12 | 12q13.12 |
| LU15_L  | 3  | 6  | 17 | 50,671,134 | 21,187,096  | 6p12.3   | 17p11.2  |
| LU20_AD | 4  | 17 | 6  | 50,671,704 | 101,674,234 | 17q22    | 6q16.3   |
| LU4_AD  | 3  | 17 | 12 | 50,675,452 | 17,449,943  | 17q22    | 12p12.3  |
| LU18_L  | 9  | 6  | 6  | 50,748,933 | 55,792,301  | 6p12.3   | 6p12.1   |
| LU7_L   | 4  | 12 | 12 | 50,879,435 | 57,029,578  | 12q13.12 | 12q13.3  |
| LU7_L   | 3  | 10 | 10 | 50,880,067 | 50,910,683  | 10q11.23 | 10q11.23 |
| LU12_L  | 3  | 12 | 1  | 50,889,449 | 142,597,059 | 12q13.12 | 1q12     |
| LU21_AD | 9  | 3  | 3  | 50,893,394 | 50,948,709  | 3p21.2   | 3p21.2   |
| LU7_AD  | 5  | 10 | 12 | 50,894,087 | 126,352,808 | 10q11.23 | 12q24.32 |
| LU7_L   | 5  | 12 | 12 | 50,904,315 | 50,661,760  | 12q13.12 | 12q13.12 |
| LU7_AD  | 3  | 12 | 12 | 50,908,134 | 62,964,123  | 12q13.12 | 12q14.1  |
| LU7_L   | 7  | 12 | 12 | 50,908,351 | 62,963,167  | 12q13.12 | 12q14.1  |
| LU7_L   | 3  | 10 | 10 | 50,910,683 | 50,880,067  | 10q11.23 | 10q11.23 |
| LU7_L   | 7  | 12 | 12 | 50,913,680 | 49,754,782  | 12q13.12 | 12q13.12 |
| LU7_L   | 3  | 12 | 12 | 50,917,010 | 56,365,632  | 12q13.12 | 12q13.2  |
| LU6_L   | 8  | 14 | 14 | 50,918,048 | 51,098,205  | 14q22.1  | 14q22.1  |
| LU21_L  | 11 | 5  | 5  | 50,920,653 | 11,239,452  | 5q11.2   | 5p15.2   |
| LU20_AD | 3  | 17 | 17 | 50,947,991 | 50,991,353  | 17q22    | 17q22    |
| LU21_AD | 9  | 3  | 3  | 50,948,709 | 50,893,394  | 3p21.2   | 3p21.2   |
| LU20_AD | 3  | 17 | 17 | 50,991,353 | 50,947,991  | 17q22    | 17q22    |

|         |    |    |    |            |             |          |          |
|---------|----|----|----|------------|-------------|----------|----------|
| LU4_AD  | 13 | 16 | 16 | 51,028,763 | 61,546,497  | 16q12.1  | 16q21    |
| LU4_L   | 11 | 16 | 16 | 51,041,694 | 53,615,503  | 16q12.1  | 16q12.2  |
| LU4_AD  | 26 | 16 | 16 | 51,042,267 | 53,614,614  | 16q12.1  | 16q12.2  |
| LU4_L   | 3  | 23 | 23 | 51,052,043 | 51,085,261  | Xp11.22  | Xp11.22  |
| LU16_AD | 5  | 14 | 12 | 51,053,399 | 75,211,468  | 14q22.1  | 12q21.1  |
| LU7_AD  | 17 | 12 | 12 | 51,073,613 | 49,112,308  | 12q13.12 | 12q13.12 |
| LU7_L   | 16 | 12 | 12 | 51,073,817 | 49,111,352  | 12q13.12 | 12q13.12 |
| LU4_L   | 3  | 23 | 23 | 51,085,261 | 51,052,043  | Xp11.22  | Xp11.22  |
| LU6_L   | 8  | 14 | 14 | 51,098,205 | 50,918,048  | 14q22.1  | 14q22.1  |
| LU15_L  | 3  | 19 | 3  | 51,106,866 | 190,594,813 | 19q13.33 | 3q28     |
| LU12_L  | 4  | 19 | 3  | 51,107,251 | 190,594,362 | 19q13.33 | 3q28     |
| LU20_AD | 4  | 22 | 1  | 51,125,575 | 207,634,822 | 22q13.33 | 1q32.2   |
| LU7_L   | 4  | 12 | 7  | 51,156,187 | 36,271,666  | 12q13.12 | 7p14.2   |
| LU16_AD | 3  | 14 | 14 | 51,157,195 | 56,121,801  | 14q22.1  | 14q22.3  |
| LU7_L   | 3  | 12 | 12 | 51,215,124 | 69,587,323  | 12q13.12 | 12q15    |
| LU7_AD  | 5  | 12 | 9  | 51,218,276 | 45,030,110  | 12q13.12 | 9p11.2   |
| LU7_L   | 9  | 12 | 12 | 51,218,556 | 54,501,890  | 12q13.12 | 12q13.13 |
| LU7_AD  | 5  | 12 | 12 | 51,218,620 | 54,502,294  | 12q13.12 | 12q13.13 |
| LU7_L   | 4  | 12 | 9  | 51,220,261 | 45,027,525  | 12q13.12 | 9p11.2   |
| LU16_AD | 3  | 14 | 14 | 51,227,826 | 59,097,946  | 14q22.1  | 14q23.1  |
| LU16_AD | 8  | 14 | 12 | 51,259,980 | 75,340,495  | 14q22.1  | 12q21.1  |
| LU12_L  | 4  | 12 | 4  | 51,299,558 | 114,971,955 | 12q13.12 | 4q26     |
| LU18_L  | 3  | 12 | 2  | 51,302,591 | 31,856,943  | 12q13.12 | 2p23.1   |
| LU4_AD  | 6  | 1  | 1  | 51,368,972 | 25,849,425  | 1p32.3   | 1p36.11  |
| LU8_L   | 3  | 11 | 11 | 51,376,547 | 51,419,392  | 11p11.12 | 11p11.12 |
| LU8_L   | 3  | 11 | 11 | 51,419,392 | 51,376,547  | 11p11.12 | 11p11.12 |
| LU12_AD | 6  | 7  | 7  | 51,459,273 | 65,843,722  | 7p12.1   | 7q11.21  |
| LU16_AD | 5  | 1  | 7  | 51,514,525 | 92,899,713  | 1p32.3   | 7q21.3   |
| LU20_AD | 3  | 18 | 9  | 51,533,876 | 7,426,519   | 18q21.2  | 9p24.1   |
| LU4_AD  | 3  | 15 | 1  | 51,575,010 | 62,648,657  | 15q21.2  | 1p31.3   |
| LU8_L   | 3  | 15 | 15 | 51,576,768 | 62,505,606  | 15q21.2  | 15q22.2  |
| LU20_L  | 3  | 5  | 9  | 51,602,150 | 96,516,455  | 5q11.2   | 9q22.31  |
| LU18_L  | 3  | 15 | 11 | 51,651,580 | 114,219,934 | 15q21.2  | 11q23.2  |
| LU20_L  | 3  | 17 | 17 | 51,718,185 | 51,749,577  | 17q22    | 17q22    |
| LU20_L  | 3  | 13 | 1  | 51,733,452 | 13,433,187  | 13q14.3  | 1p36.21  |
| LU21_L  | 7  | 5  | 5  | 51,736,688 | 13,997,705  | 5q11.2   | 5p15.2   |
| LU18_L  | 3  | 10 | 10 | 51,739,065 | 38,454,863  | 10q11.23 | 10p11.1  |
| LU15_L  | 4  | 13 | 13 | 51,746,364 | 56,158,314  | 13q14.3  | 13q21.1  |
| LU20_L  | 3  | 17 | 17 | 51,749,577 | 51,718,185  | 17q22    | 17q22    |
| LU21_L  | 5  | 5  | 5  | 51,798,360 | 12,675,224  | 5q11.2   | 5p15.2   |
| LU5_L   | 4  | 7  | 7  | 51,805,689 | 51,843,564  | 7p12.1   | 7p12.1   |
| LU5_L   | 4  | 7  | 7  | 51,843,564 | 51,805,689  | 7p12.1   | 7p12.1   |
| LU21_L  | 7  | 20 | 16 | 51,868,943 | 847,599     | 20q13.2  | 16p13.3  |
| LU4_AD  | 3  | 23 | 23 | 51,937,122 | 54,956,984  | Xp11.22  | Xp11.21  |

|         |    |    |    |            |             |          |          |
|---------|----|----|----|------------|-------------|----------|----------|
| LU8_L   | 3  | 12 | 12 | 51,992,718 | 52,023,006  | 12q13.13 | 12q13.13 |
| LU7_L   | 8  | 12 | 9  | 52,020,100 | 44,843,503  | 12q13.13 | 9p11.2   |
| LU8_L   | 3  | 12 | 12 | 52,023,006 | 51,992,718  | 12q13.13 | 12q13.13 |
| LU7_L   | 11 | 12 | 12 | 52,030,591 | 54,509,685  | 12q13.13 | 12q13.13 |
| LU7_AD  | 15 | 12 | 12 | 52,031,468 | 54,508,564  | 12q13.13 | 12q13.13 |
| LU21_L  | 9  | 5  | 5  | 52,062,954 | 35,867,430  | 5q11.2   | 5p13.2   |
| LU8_AD  | 3  | 12 | 1  | 52,106,421 | 113,992,990 | 12q13.13 | 1p13.2   |
| LU21_L  | 3  | 12 | 2  | 52,106,582 | 178,081,317 | 12q13.13 | 2q31.2   |
| LU5_L   | 3  | 12 | 19 | 52,127,596 | 9,825,325   | 12q13.13 | 19p13.2  |
| LU16_AD | 3  | 1  | 11 | 52,249,800 | 90,848,326  | 1p32.3   | 11q14.3  |
| LU20_L  | 3  | 18 | 18 | 52,252,782 | 52,282,851  | 18q21.2  | 18q21.2  |
| LU20_L  | 3  | 18 | 18 | 52,282,851 | 52,252,782  | 18q21.2  | 18q21.2  |
| LU3_L   | 3  | 19 | 3  | 52,309,928 | 46,091,684  | 19q13.41 | 3p21.31  |
| LU12_L  | 33 | 8  | 8  | 52,342,602 | 65,670,579  | 8q11.22  | 8q12.3   |
| LU20_AD | 4  | 17 | 1  | 52,362,353 | 66,889,866  | 17q22    | 1p31.3   |
| LU4_L   | 4  | 17 | 1  | 52,367,675 | 161,445,889 | 17q22    | 1q23.3   |
| LU12_L  | 3  | 17 | 13 | 52,406,044 | 111,849,296 | 17q22    | 13q34    |
| LU4_L   | 3  | 10 | 10 | 52,416,182 | 81,556,644  | 10q11.23 | 10q22.3  |
| LU20_AD | 3  | 8  | 8  | 52,466,280 | 52,495,781  | 8q11.22  | 8q11.22  |
| LU7_AD  | 3  | 20 | 1  | 52,491,878 | 160,287,187 | 20q13.2  | 1q23.2   |
| LU20_AD | 3  | 8  | 8  | 52,495,781 | 52,466,280  | 8q11.22  | 8q11.22  |
| LU20_AD | 4  | 12 | 13 | 52,502,265 | 68,488,771  | 12q13.13 | 13q21.32 |
| LU7_L   | 3  | 12 | 12 | 52,541,567 | 55,715,762  | 12q13.13 | 12q13.2  |
| LU8_L   | 5  | 13 | 13 | 52,549,941 | 57,024,375  | 13q14.3  | 13q21.1  |
| LU7_L   | 7  | 12 | 12 | 52,554,463 | 67,934,265  | 12q13.13 | 12q15    |
| LU4_AD  | 5  | 2  | 2  | 52,589,247 | 52,625,536  | 2p16.3   | 2p16.3   |
| LU4_AD  | 5  | 2  | 2  | 52,625,536 | 52,589,247  | 2p16.3   | 2p16.3   |
| LU12_AD | 5  | 8  | 1  | 52,658,862 | 70,669,783  | 8q11.23  | 1p31.1   |
| LU20_AD | 4  | 1  | 1  | 52,679,992 | 46,219,510  | 1p32.3   | 1p34.1   |
| LU14_L  | 11 | 12 | 12 | 52,680,859 | 52,786,552  | 12q13.13 | 12q13.13 |
| LU14_AD | 10 | 12 | 12 | 52,689,204 | 52,779,524  | 12q13.13 | 12q13.13 |
| LU3_AD  | 4  | 19 | 19 | 52,710,695 | 11,716,386  | 19q13.41 | 19p13.2  |
| LU4_AD  | 14 | 7  | 5  | 52,767,890 | 158,230,149 | 7p12.1   | 5q33.3   |
| LU14_AD | 10 | 12 | 12 | 52,779,524 | 52,689,204  | 12q13.13 | 12q13.13 |
| LU18_AD | 3  | 6  | 5  | 52,783,416 | 31,394,289  | 6p12.2   | 5p13.3   |
| LU14_L  | 11 | 12 | 12 | 52,786,552 | 52,680,859  | 12q13.13 | 12q13.13 |
| LU4_AD  | 5  | 7  | 5  | 52,795,548 | 164,651,034 | 7p12.1   | 5q34     |
| LU21_AD | 3  | 13 | 13 | 52,800,855 | 25,163,373  | 13q14.3  | 13q12.12 |
| LU4_AD  | 12 | 7  | 5  | 52,802,723 | 164,626,640 | 7p12.1   | 5q34     |
| LU4_AD  | 3  | 13 | 13 | 52,814,472 | 25,154,184  | 13q14.3  | 13q12.12 |
| LU4_L   | 3  | 13 | 13 | 52,826,576 | 41,423,812  | 13q14.3  | 13q14.11 |
| LU21_L  | 4  | 16 | 16 | 52,847,414 | 52,879,844  | 16q12.2  | 16q12.2  |
| LU4_AD  | 5  | 7  | 7  | 52,851,436 | 53,232,060  | 7p12.1   | 7p12.1   |
| LU4_AD  | 8  | 7  | 7  | 52,853,249 | 53,234,973  | 7p12.1   | 7p12.1   |

|         |    |    |    |            |             |          |         |
|---------|----|----|----|------------|-------------|----------|---------|
| LU7_AD  | 4  | 23 | 3  | 52,861,315 | 186,507,186 | Xp11.22  | 3q27.3  |
| LU21_L  | 4  | 16 | 16 | 52,879,844 | 52,847,414  | 16q12.2  | 16q12.2 |
| LU21_L  | 7  | 5  | 5  | 52,949,889 | 4,755,839   | 5q11.2   | 5p15.32 |
| LU11_AD | 10 | 6  | 6  | 52,963,528 | 16,425,134  | 6p12.1   | 6p22.3  |
| LU18_AD | 4  | 23 | 23 | 53,021,176 | 49,146,945  | Xp11.22  | Xp11.23 |
| LU4_AD  | 17 | 7  | 5  | 53,123,687 | 157,949,947 | 7p12.1   | 5q33.3  |
| LU4_L   | 3  | 7  | 5  | 53,125,318 | 157,951,517 | 7p12.1   | 5q33.3  |
| LU20_L  | 3  | 12 | 11 | 53,144,619 | 13,441,045  | 12q13.13 | 11p15.2 |
| LU7_L   | 22 | 12 | 12 | 53,152,732 | 68,131,502  | 12q13.13 | 12q15   |
| LU7_AD  | 13 | 12 | 12 | 53,154,930 | 68,128,679  | 12q13.13 | 12q15   |
| LU4_AD  | 7  | 7  | 5  | 53,169,418 | 158,078,965 | 7p12.1   | 5q33.3  |
| LU4_L   | 5  | 7  | 5  | 53,170,242 | 158,078,479 | 7p12.1   | 5q33.3  |
| LU4_AD  | 12 | 5  | 5  | 53,176,676 | 66,642,016  | 5q11.2   | 5q12.3  |
| LU5_L   | 3  | 13 | 18 | 53,212,120 | 29,992,407  | 13q14.3  | 18q12.1 |
| LU4_AD  | 5  | 7  | 7  | 53,232,060 | 52,851,436  | 7p12.1   | 7p12.1  |
| LU4_AD  | 8  | 7  | 7  | 53,234,973 | 52,853,249  | 7p12.1   | 7p12.1  |
| LU21_AD | 3  | 15 | 15 | 53,271,571 | 53,313,985  | 15q21.3  | 15q21.3 |
| LU12_L  | 3  | 8  | 8  | 53,272,686 | 53,304,808  | 8q11.23  | 8q11.23 |
| LU12_L  | 3  | 8  | 8  | 53,304,808 | 53,272,686  | 8q11.23  | 8q11.23 |
| LU3_L   | 3  | 12 | 12 | 53,309,863 | 76,158,088  | 12q13.13 | 12q21.2 |
| LU21_AD | 3  | 15 | 15 | 53,313,985 | 53,271,571  | 15q21.3  | 15q21.3 |
| LU14_L  | 3  | 18 | 18 | 53,471,940 | 53,511,277  | 18q21.2  | 18q21.2 |
| LU12_L  | 20 | 8  | 8  | 53,473,729 | 116,426,853 | 8q11.23  | 8q23.3  |
| LU12_L  | 11 | 8  | 8  | 53,477,319 | 24,657,154  | 8q11.23  | 8p21.2  |
| LU7_AD  | 4  | 12 | 12 | 53,495,541 | 58,203,736  | 12q13.13 | 12q14.1 |
| LU14_L  | 3  | 18 | 18 | 53,511,277 | 53,471,940  | 18q21.2  | 18q21.2 |
| LU18_AD | 4  | 17 | 23 | 53,549,441 | 152,362,886 | 17q22    | Xq28    |
| LU16_L  | 6  | 23 | 23 | 53,551,969 | 53,622,373  | Xp11.22  | Xp11.22 |
| LU4_AD  | 5  | 16 | 16 | 53,609,607 | 56,220,298  | 16q12.2  | 16q12.2 |
| LU4_AD  | 26 | 16 | 16 | 53,614,614 | 51,042,267  | 16q12.2  | 16q12.1 |
| LU4_L   | 11 | 16 | 16 | 53,615,503 | 51,041,694  | 16q12.2  | 16q12.1 |
| LU21_AD | 3  | 18 | 3  | 53,619,012 | 79,825,860  | 18q21.2  | 3p12.2  |
| LU16_L  | 6  | 23 | 23 | 53,622,373 | 53,551,969  | Xp11.22  | Xp11.22 |
| LU20_L  | 4  | 5  | 11 | 53,647,566 | 95,344,208  | 5q11.2   | 11q21   |
| LU4_AD  | 25 | 16 | 16 | 53,650,480 | 56,286,270  | 16q12.2  | 16q12.2 |
| LU4_L   | 14 | 16 | 16 | 53,652,020 | 56,285,351  | 16q12.2  | 16q12.2 |
| LU20_AD | 3  | 3  | 3  | 53,790,845 | 53,825,454  | 3p21.1   | 3p21.1  |
| LU20_AD | 3  | 3  | 3  | 53,825,454 | 53,790,845  | 3p21.1   | 3p21.1  |
| LU12_AD | 9  | 8  | 1  | 53,859,848 | 47,370,444  | 8q11.23  | 1p33    |
| LU3_L   | 3  | 5  | 5  | 53,893,170 | 53,929,724  | 5q11.2   | 5q11.2  |
| LU3_L   | 3  | 5  | 5  | 53,929,724 | 53,893,170  | 5q11.2   | 5q11.2  |
| LU20_AD | 3  | 20 | 23 | 53,968,148 | 106,296,429 | 20q13.2  | Xq22.3  |
| LU3_L   | 5  | 6  | 6  | 53,984,453 | 54,033,287  | 6p12.1   | 6p12.1  |
| LU11_AD | 3  | 7  | 5  | 54,024,247 | 72,227,876  | 7p11.2   | 5q13.2  |

|         |    |    |    |            |             |          |          |
|---------|----|----|----|------------|-------------|----------|----------|
| LU15_L  | 10 | 3  | 3  | 54,026,530 | 54,696,207  | 3p21.1   | 3p14.3   |
| LU3_L   | 5  | 6  | 6  | 54,033,287 | 53,984,453  | 6p12.1   | 6p12.1   |
| LU20_L  | 3  | 8  | 1  | 54,053,705 | 173,339,186 | 8q11.23  | 1q25.1   |
| LU7_AD  | 6  | 12 | 12 | 54,090,292 | 68,648,664  | 12q13.13 | 12q15    |
| LU16_L  | 4  | 12 | 12 | 54,112,106 | 64,988,132  | 12q13.13 | 12q14.2  |
| LU15_L  | 6  | 3  | 3  | 54,170,502 | 67,279,246  | 3p21.1   | 3p14.1   |
| LU15_L  | 5  | 17 | 17 | 54,174,347 | 54,213,797  | 17q22    | 17q22    |
| LU15_L  | 27 | 5  | 5  | 54,195,486 | 50,368,533  | 5q11.2   | 5q11.1   |
| LU21_L  | 3  | 7  | 7  | 54,213,020 | 54,256,557  | 7p11.2   | 7p11.2   |
| LU15_L  | 5  | 17 | 17 | 54,213,797 | 54,174,347  | 17q22    | 17q22    |
| LU4_L   | 3  | 12 | 12 | 54,232,271 | 54,279,068  | 12q13.13 | 12q13.13 |
| LU21_L  | 3  | 7  | 7  | 54,256,557 | 54,213,020  | 7p11.2   | 7p11.2   |
| LU12_L  | 19 | 16 | 16 | 54,265,847 | 47,908,201  | 16q12.2  | 16q12.1  |
| LU4_L   | 3  | 12 | 12 | 54,279,068 | 54,232,271  | 12q13.13 | 12q13.13 |
| LU8_L   | 3  | 8  | 23 | 54,373,083 | 104,130,919 | 8q11.23  | Xq22.3   |
| LU3_AD  | 5  | 12 | 12 | 54,438,503 | 30,780,981  | 12q13.13 | 12p11.21 |
| LU15_L  | 7  | 5  | 5  | 54,446,113 | 56,273,742  | 5q11.2   | 5q11.2   |
| LU7_L   | 3  | 12 | 12 | 54,476,534 | 70,090,683  | 12q13.13 | 12q15    |
| LU7_L   | 9  | 12 | 12 | 54,501,890 | 51,218,556  | 12q13.13 | 12q13.12 |
| LU7_AD  | 5  | 12 | 12 | 54,502,294 | 51,218,620  | 12q13.13 | 12q13.12 |
| LU7_AD  | 15 | 12 | 12 | 54,508,564 | 52,031,468  | 12q13.13 | 12q13.13 |
| LU4_L   | 4  | 18 | 18 | 54,509,487 | 54,546,681  | 18q21.31 | 18q21.31 |
| LU7_L   | 11 | 12 | 12 | 54,509,685 | 52,030,591  | 12q13.13 | 12q13.13 |
| LU7_L   | 4  | 7  | 21 | 54,531,244 | 20,416,966  | 7p11.2   | 21q21.1  |
| LU4_L   | 4  | 18 | 18 | 54,546,681 | 54,509,487  | 18q21.31 | 18q21.31 |
| LU7_L   | 3  | 12 | 12 | 54,565,041 | 57,024,437  | 12q13.13 | 12q13.3  |
| LU21_L  | 5  | 5  | 5  | 54,610,230 | 37,089,043  | 5q11.2   | 5p13.2   |
| LU15_L  | 10 | 3  | 3  | 54,696,207 | 54,026,530  | 3p14.3   | 3p21.1   |
| LU15_L  | 5  | 3  | 3  | 54,698,587 | 55,915,893  | 3p14.3   | 3p14.3   |
| LU15_L  | 3  | 1  | 1  | 54,761,438 | 54,796,016  | 1p32.3   | 1p32.3   |
| LU15_L  | 3  | 1  | 1  | 54,796,016 | 54,761,438  | 1p32.3   | 1p32.3   |
| LU21_L  | 5  | 20 | 18 | 54,825,378 | 1,672,161   | 20q13.2  | 18p11.32 |
| LU4_AD  | 3  | 23 | 23 | 54,956,984 | 51,937,122  | Xp11.21  | Xp11.22  |
| LU3_L   | 3  | 2  | 2  | 54,963,997 | 55,002,475  | 2p16.2   | 2p16.1   |
| LU3_L   | 3  | 2  | 2  | 55,002,475 | 54,963,997  | 2p16.1   | 2p16.2   |
| LU21_L  | 7  | 20 | 20 | 55,007,907 | 60,015,839  | 20q13.31 | 20q13.33 |
| LU7_AD  | 11 | 12 | 12 | 55,064,192 | 55,796,876  | 12q13.2  | 12q13.2  |
| LU7_L   | 26 | 12 | 12 | 55,065,576 | 55,795,364  | 12q13.2  | 12q13.2  |
| LU7_L   | 4  | 12 | 15 | 55,072,227 | 33,362,971  | 12q13.2  | 15q13.3  |
| LU7_AD  | 4  | 12 | 15 | 55,072,387 | 33,363,444  | 12q13.2  | 15q13.3  |
| LU21_L  | 4  | 1  | 6  | 55,096,213 | 29,843,456  | 1p32.3   | 6p22.1   |
| LU20_L  | 3  | 1  | 3  | 55,100,637 | 184,734,343 | 1p32.3   | 3q27.2   |
| LU4_AD  | 6  | 10 | 5  | 55,114,243 | 169,065,363 | 10q21.1  | 5q35.1   |
| LU18_AD | 17 | 14 | 5  | 55,115,379 | 125,548,314 | 14q22.2  | 5q23.2   |

|         |    |    |    |            |             |          |          |
|---------|----|----|----|------------|-------------|----------|----------|
| LU18_L  | 8  | 14 | 5  | 55,115,736 | 125,550,076 | 14q22.2  | 5q23.2   |
| LU20_L  | 3  | 5  | 5  | 55,159,804 | 55,197,423  | 5q11.2   | 5q11.2   |
| LU7_L   | 20 | 12 | 12 | 55,192,055 | 63,460,887  | 12q13.2  | 12q14.2  |
| LU7_AD  | 16 | 12 | 12 | 55,192,223 | 63,460,832  | 12q13.2  | 12q14.2  |
| LU20_L  | 3  | 5  | 5  | 55,197,423 | 55,159,804  | 5q11.2   | 5q11.2   |
| LU18_L  | 3  | 23 | 4  | 55,205,149 | 156,382,568 | Xp11.21  | 4q32.1   |
| LU7_AD  | 4  | 12 | 7  | 55,224,414 | 37,230,977  | 12q13.2  | 7p14.1   |
| LU7_L   | 12 | 12 | 7  | 55,226,604 | 37,231,370  | 12q13.2  | 7p14.1   |
| LU7_L   | 7  | 12 | 12 | 55,229,754 | 55,576,329  | 12q13.2  | 12q13.2  |
| LU7_L   | 16 | 12 | 12 | 55,239,310 | 62,547,612  | 12q13.2  | 12q14.1  |
| LU7_AD  | 9  | 12 | 12 | 55,242,182 | 62,544,739  | 12q13.2  | 12q14.1  |
| LU12_AD | 3  | 5  | 17 | 55,265,407 | 15,687,689  | 5q11.2   | 17p12    |
| LU18_L  | 3  | 1  | 12 | 55,363,648 | 70,483,717  | 1p32.3   | 12q15    |
| LU8_AD  | 4  | 1  | 11 | 55,374,384 | 95,041,453  | 1p32.3   | 11q21    |
| LU15_L  | 4  | 12 | 2  | 55,381,409 | 217,492,521 | 12q13.2  | 2q35     |
| LU12_L  | 3  | 4  | 4  | 55,475,408 | 55,505,136  | 4q12     | 4q12     |
| LU20_AD | 7  | 10 | 10 | 55,486,002 | 56,177,035  | 10q21.1  | 10q21.1  |
| LU12_L  | 4  | 1  | 5  | 55,489,700 | 103,404,169 | 1p32.3   | 5q21.2   |
| LU12_L  | 4  | 1  | 4  | 55,490,973 | 95,218,766  | 1p32.3   | 4q22.3   |
| LU12_L  | 3  | 4  | 4  | 55,505,136 | 55,475,408  | 4q12     | 4q12     |
| LU7_AD  | 3  | 12 | 7  | 55,529,850 | 46,009,678  | 12q13.2  | 7p12.3   |
| LU11_AD | 76 | 20 | 12 | 55,558,391 | 114,742,337 | 20q13.31 | 12q24.21 |
| LU11_L  | 30 | 20 | 12 | 55,558,540 | 114,742,365 | 20q13.31 | 12q24.21 |
| LU7_L   | 12 | 12 | 12 | 55,571,170 | 65,101,314  | 12q13.2  | 12q14.3  |
| LU7_AD  | 3  | 12 | 12 | 55,572,973 | 65,100,761  | 12q13.2  | 12q14.3  |
| LU7_L   | 7  | 12 | 12 | 55,576,329 | 55,229,754  | 12q13.2  | 12q13.2  |
| LU3_L   | 3  | 11 | 11 | 55,643,288 | 89,521,265  | 11q11    | 11q14.3  |
| LU7_L   | 3  | 12 | 12 | 55,715,762 | 52,541,567  | 12q13.2  | 12q13.13 |
| LU7_L   | 4  | 12 | 2  | 55,728,400 | 130,721,489 | 12q13.2  | 2q21.1   |
| LU7_AD  | 3  | 12 | 12 | 55,790,975 | 55,979,853  | 12q13.2  | 12q13.2  |
| LU7_L   | 13 | 12 | 12 | 55,791,196 | 55,981,660  | 12q13.2  | 12q13.2  |
| LU18_L  | 9  | 6  | 6  | 55,792,301 | 50,748,933  | 6p12.1   | 6p12.3   |
| LU7_L   | 26 | 12 | 12 | 55,795,364 | 55,065,576  | 12q13.2  | 12q13.2  |
| LU7_AD  | 11 | 12 | 12 | 55,796,876 | 55,064,192  | 12q13.2  | 12q13.2  |
| LU18_L  | 3  | 15 | 1  | 55,803,780 | 186,883,030 | 15q21.3  | 1q31.1   |
| LU20_AD | 4  | 15 | 8  | 55,804,308 | 24,101,232  | 15q21.3  | 8p21.2   |
| LU7_L   | 15 | 12 | 12 | 55,804,337 | 55,966,431  | 12q13.2  | 12q13.2  |
| LU7_AD  | 7  | 12 | 12 | 55,805,567 | 55,968,071  | 12q13.2  | 12q13.2  |
| LU12_L  | 5  | 11 | 12 | 55,813,653 | 14,637,444  | 11q12.1  | 12p13.1  |
| LU11_AD | 49 | 12 | 12 | 55,820,011 | 43,212,187  | 12q13.2  | 12q12    |
| LU11_L  | 37 | 12 | 12 | 55,820,145 | 43,212,668  | 12q13.2  | 12q12    |
| LU3_L   | 3  | 7  | 7  | 55,821,775 | 65,851,543  | 7p11.2   | 7q11.21  |
| LU3_L   | 3  | 8  | 13 | 55,841,847 | 111,707,786 | 8q12.1   | 13q34    |
| LU12_L  | 5  | 5  | 5  | 55,851,107 | 55,930,139  | 5q11.2   | 5q11.2   |

|         |    |    |    |            |             |          |          |
|---------|----|----|----|------------|-------------|----------|----------|
| LU11_L  | 4  | 20 | 1  | 55,858,940 | 160,267,970 | 20q13.31 | 1q23.2   |
| LU11_L  | 8  | 20 | 1  | 55,864,022 | 160,299,986 | 20q13.31 | 1q23.2   |
| LU7_L   | 14 | 12 | 21 | 55,885,591 | 35,374,359  | 12q13.2  | 21q22.11 |
| LU7_AD  | 11 | 12 | 21 | 55,885,875 | 35,373,684  | 12q13.2  | 21q22.11 |
| LU15_L  | 5  | 3  | 3  | 55,915,893 | 54,698,587  | 3p14.3   | 3p14.3   |
| LU12_L  | 5  | 5  | 5  | 55,930,139 | 55,851,107  | 5q11.2   | 5q11.2   |
| LU7_L   | 15 | 12 | 12 | 55,966,431 | 55,804,337  | 12q13.2  | 12q13.2  |
| LU7_AD  | 7  | 12 | 12 | 55,968,071 | 55,805,567  | 12q13.2  | 12q13.2  |
| LU7_AD  | 3  | 12 | 12 | 55,979,853 | 55,790,975  | 12q13.2  | 12q13.2  |
| LU7_L   | 13 | 12 | 12 | 55,981,660 | 55,791,196  | 12q13.2  | 12q13.2  |
| LU3_AD  | 3  | 12 | 12 | 56,022,699 | 49,372,568  | 12q13.2  | 12q13.12 |
| LU15_AD | 7  | 20 | 9  | 56,040,698 | 38,437,816  | 20q13.31 | 9p13.1   |
| LU15_L  | 7  | 20 | 9  | 56,046,141 | 38,437,240  | 20q13.31 | 9p13.1   |
| LU15_L  | 20 | 20 | 9  | 56,049,437 | 39,193,993  | 20q13.31 | 9p13.1   |
| LU15_AD | 9  | 20 | 9  | 56,049,550 | 39,194,846  | 20q13.31 | 9p13.1   |
| LU15_AD | 15 | 20 | 9  | 56,055,511 | 34,466,309  | 20q13.31 | 9p13.3   |
| LU15_L  | 20 | 20 | 9  | 56,058,516 | 34,462,557  | 20q13.31 | 9p13.3   |
| LU7_L   | 10 | 12 | 12 | 56,097,178 | 50,287,437  | 12q13.2  | 12q13.12 |
| LU7_L   | 13 | 12 | 12 | 56,104,617 | 49,749,942  | 12q13.2  | 12q13.12 |
| LU4_AD  | 4  | 1  | 1  | 56,105,405 | 56,135,463  | 1p32.2   | 1p32.2   |
| LU7_L   | 4  | 12 | 12 | 56,117,616 | 60,262,483  | 12q13.2  | 12q14.1  |
| LU16_AD | 3  | 14 | 14 | 56,121,801 | 51,157,195  | 14q22.3  | 14q22.1  |
| LU4_AD  | 4  | 1  | 1  | 56,135,463 | 56,105,405  | 1p32.2   | 1p32.2   |
| LU4_AD  | 4  | 19 | 2  | 56,147,660 | 243,153,708 | 19q13.42 | 2q37.3   |
| LU5_AD  | 3  | 1  | 1  | 56,157,150 | 56,201,097  | 1p32.2   | 1p32.2   |
| LU15_L  | 4  | 13 | 13 | 56,158,314 | 51,746,364  | 13q21.1  | 13q14.3  |
| LU20_AD | 7  | 10 | 10 | 56,177,035 | 55,486,002  | 10q21.1  | 10q21.1  |
| LU5_L   | 3  | 1  | 1  | 56,196,734 | 56,227,690  | 1p32.2   | 1p32.2   |
| LU5_AD  | 3  | 1  | 1  | 56,201,097 | 56,157,150  | 1p32.2   | 1p32.2   |
| LU4_AD  | 5  | 16 | 16 | 56,220,298 | 53,609,607  | 16q12.2  | 16q12.2  |
| LU11_L  | 5  | 12 | 12 | 56,225,220 | 48,430,144  | 12q13.2  | 12q13.11 |
| LU5_L   | 3  | 1  | 1  | 56,227,690 | 56,196,734  | 1p32.2   | 1p32.2   |
| LU4_AD  | 12 | 16 | 16 | 56,228,497 | 50,547,334  | 16q12.2  | 16q12.1  |
| LU7_L   | 8  | 12 | 12 | 56,253,309 | 50,292,841  | 12q13.2  | 12q13.12 |
| LU7_L   | 7  | 12 | 12 | 56,256,361 | 57,873,673  | 12q13.2  | 12q13.3  |
| LU15_L  | 7  | 5  | 5  | 56,273,742 | 54,446,113  | 5q11.2   | 5q11.2   |
| LU4_L   | 14 | 16 | 16 | 56,285,351 | 53,652,020  | 16q12.2  | 16q12.2  |
| LU4_AD  | 25 | 16 | 16 | 56,286,270 | 53,650,480  | 16q12.2  | 16q12.2  |
| LU7_AD  | 10 | 12 | 12 | 56,311,080 | 60,801,189  | 12q13.2  | 12q14.1  |
| LU7_AD  | 10 | 12 | 12 | 56,324,357 | 70,071,292  | 12q13.2  | 12q15    |
| LU7_L   | 6  | 12 | 12 | 56,326,569 | 70,071,547  | 12q13.2  | 12q15    |
| LU7_AD  | 7  | 12 | 12 | 56,330,916 | 65,537,110  | 12q13.2  | 12q14.3  |
| LU7_L   | 6  | 12 | 12 | 56,331,989 | 65,537,075  | 12q13.2  | 12q14.3  |
| LU11_L  | 6  | 12 | 12 | 56,333,358 | 59,228,968  | 12q13.2  | 12q14.1  |



|         |    |    |    |            |             |          |          |
|---------|----|----|----|------------|-------------|----------|----------|
| LU7_AD  | 4  | 12 | 12 | 56,361,722 | 61,522,655  | 12q13.2  | 12q14.1  |
| LU7_L   | 3  | 12 | 12 | 56,365,632 | 50,917,010  | 12q13.2  | 12q13.12 |
| LU11_AD | 13 | 12 | 12 | 56,399,730 | 57,983,275  | 12q13.2  | 12q13.3  |
| LU11_L  | 15 | 12 | 12 | 56,400,208 | 57,980,063  | 12q13.2  | 12q13.3  |
| LU11_L  | 13 | 12 | 18 | 56,404,650 | 35,820,046  | 12q13.2  | 18q12.2  |
| LU11_AD | 9  | 12 | 18 | 56,409,767 | 35,819,336  | 12q13.2  | 18q12.2  |
| LU11_AD | 13 | 12 | 12 | 56,417,131 | 57,979,851  | 12q13.2  | 12q13.3  |
| LU11_L  | 4  | 12 | 12 | 56,417,287 | 57,980,189  | 12q13.2  | 12q13.3  |
| LU11_AD | 6  | 12 | 12 | 56,417,758 | 49,975,265  | 12q13.2  | 12q13.12 |
| LU18_L  | 5  | 20 | 20 | 56,428,423 | 56,462,877  | 20q13.31 | 20q13.31 |
| LU11_L  | 7  | 12 | 12 | 56,429,740 | 43,045,311  | 12q13.2  | 12q12    |
| LU11_L  | 11 | 12 | 12 | 56,436,034 | 43,029,660  | 12q13.2  | 12q12    |
| LU11_AD | 14 | 12 | 12 | 56,437,692 | 43,029,754  | 12q13.2  | 12q12    |
| LU12_L  | 4  | 19 | 19 | 56,452,003 | 56,780,905  | 19q13.43 | 19q13.43 |
| LU11_L  | 5  | 20 | 7  | 56,455,619 | 73,123,141  | 20q13.31 | 7q11.23  |
| LU18_L  | 5  | 20 | 20 | 56,462,877 | 56,428,423  | 20q13.31 | 20q13.31 |
| LU8_AD  | 3  | 8  | 8  | 56,488,127 | 56,527,197  | 8q12.1   | 8q12.1   |
| LU8_AD  | 3  | 8  | 8  | 56,527,197 | 56,488,127  | 8q12.1   | 8q12.1   |
| LU11_L  | 8  | 20 | 12 | 56,527,461 | 43,058,591  | 20q13.32 | 12q12    |
| LU7_L   | 4  | 12 | 12 | 56,548,627 | 70,058,686  | 12q13.2  | 12q15    |
| LU7_AD  | 11 | 12 | 12 | 56,548,878 | 50,606,910  | 12q13.2  | 12q13.12 |
| LU7_AD  | 5  | 12 | 12 | 56,549,047 | 70,058,727  | 12q13.2  | 12q15    |
| LU7_L   | 13 | 12 | 12 | 56,553,510 | 50,605,720  | 12q13.2  | 12q13.12 |
| LU11_L  | 4  | 12 | 12 | 56,554,024 | 107,144,272 | 12q13.2  | 12q23.3  |
| LU11_L  | 7  | 12 | 12 | 56,554,514 | 49,100,538  | 12q13.2  | 12q13.12 |
| LU11_L  | 24 | 12 | 18 | 56,561,234 | 31,585,213  | 12q13.2  | 18q12.1  |
| LU11_L  | 22 | 12 | 12 | 56,573,324 | 107,271,757 | 12q13.2  | 12q23.3  |
| LU15_AD | 16 | 20 | 9  | 56,583,209 | 2,810,915   | 20q13.32 | 9p24.2   |
| LU15_L  | 7  | 20 | 9  | 56,584,482 | 2,812,050   | 20q13.32 | 9p24.2   |
| LU18_L  | 3  | 11 | 11 | 56,616,886 | 6,204,018   | 11q12.1  | 11p15.4  |
| LU18_AD | 5  | 11 | 11 | 56,617,112 | 6,206,175   | 11q12.1  | 11p15.4  |
| LU21_L  | 3  | 8  | 1  | 56,618,994 | 92,128,182  | 8q12.1   | 1p22.1   |
| LU4_L   | 3  | 7  | 19 | 56,646,298 | 23,524,640  | 7p11.2   | 19p12    |
| LU11_AD | 11 | 12 | 12 | 56,654,563 | 106,975,678 | 12q13.3  | 12q23.3  |
| LU11_AD | 10 | 12 | 12 | 56,654,654 | 68,833,957  | 12q13.3  | 12q15    |
| LU11_L  | 6  | 12 | 12 | 56,654,999 | 106,975,753 | 12q13.3  | 12q23.3  |
| LU14_AD | 3  | 1  | 1  | 56,661,896 | 56,692,580  | 1p32.2   | 1p32.2   |
| LU14_AD | 3  | 1  | 1  | 56,692,580 | 56,661,896  | 1p32.2   | 1p32.2   |
| LU4_L   | 3  | 5  | 14 | 56,720,235 | 22,480,559  | 5q11.2   | 14q11.2  |
| LU20_AD | 5  | 6  | 17 | 56,757,831 | 25,560,225  | 6p12.1   | 17q11.1  |
| LU12_L  | 4  | 19 | 19 | 56,780,905 | 56,452,003  | 19q13.43 | 19q13.43 |
| LU4_AD  | 3  | 5  | 16 | 56,818,072 | 31,906,485  | 5q11.2   | 16p11.2  |
| LU4_AD  | 4  | 5  | 5  | 56,826,352 | 164,820,355 | 5q11.2   | 5q34     |
| LU11_L  | 3  | 12 | 18 | 56,870,937 | 31,450,616  | 12q13.3  | 18q12.1  |

|         |    |    |    |            |             |          |          |
|---------|----|----|----|------------|-------------|----------|----------|
| LU4_AD  | 5  | 5  | 23 | 56,874,203 | 96,419,351  | 5q11.2   | Xq21.33  |
| LU11_L  | 4  | 12 | 12 | 56,880,800 | 107,125,964 | 12q13.3  | 12q23.3  |
| LU8_L   | 4  | 6  | 2  | 56,895,132 | 99,812,670  | 6p12.1   | 2q11.2   |
| LU21_AD | 20 | 8  | 8  | 56,918,641 | 57,880,248  | 8q12.1   | 8q12.1   |
| LU21_L  | 20 | 8  | 8  | 56,918,996 | 57,881,653  | 8q12.1   | 8q12.1   |
| LU11_L  | 7  | 12 | 18 | 56,923,347 | 32,115,502  | 12q13.3  | 18q12.1  |
| LU4_AD  | 3  | 7  | 7  | 56,923,588 | 75,706,779  | 7p11.2   | 7q11.23  |
| LU20_AD | 4  | 2  | 24 | 56,946,067 | 23,876,064  | 2p16.1   | Yq11.223 |
| LU11_L  | 8  | 12 | 12 | 56,965,073 | 115,138,941 | 12q13.3  | 12q24.21 |
| LU11_L  | 6  | 12 | 12 | 56,968,493 | 115,092,357 | 12q13.3  | 12q24.21 |
| LU11_L  | 4  | 12 | 18 | 56,974,406 | 32,110,796  | 12q13.3  | 18q12.1  |
| LU7_L   | 3  | 13 | 13 | 56,983,507 | 57,034,829  | 13q21.1  | 13q21.1  |
| LU21_AD | 3  | 15 | 15 | 57,008,263 | 57,042,722  | 15q21.3  | 15q21.3  |
| LU8_L   | 5  | 13 | 13 | 57,024,375 | 52,549,941  | 13q21.1  | 13q14.3  |
| LU7_L   | 3  | 12 | 12 | 57,024,437 | 54,565,041  | 12q13.3  | 12q13.13 |
| LU7_L   | 4  | 12 | 12 | 57,029,578 | 50,879,435  | 12q13.3  | 12q13.12 |
| LU7_L   | 3  | 13 | 13 | 57,034,829 | 56,983,507  | 13q21.1  | 13q21.1  |
| LU21_AD | 3  | 15 | 15 | 57,042,722 | 57,008,263  | 15q21.3  | 15q21.3  |
| LU3_AD  | 3  | 10 | 10 | 57,047,905 | 57,091,231  | 10q21.1  | 10q21.1  |
| LU21_L  | 10 | 8  | 8  | 57,057,994 | 57,768,653  | 8q12.1   | 8q12.1   |
| LU3_AD  | 3  | 10 | 10 | 57,091,231 | 57,047,905  | 10q21.1  | 10q21.1  |
| LU11_AD | 28 | 20 | 18 | 57,110,212 | 36,542,992  | 20q13.32 | 18q12.2  |
| LU11_AD | 18 | 20 | 18 | 57,114,558 | 28,171,729  | 20q13.32 | 18q12.1  |
| LU11_L  | 5  | 20 | 18 | 57,115,076 | 28,173,214  | 20q13.32 | 18q12.1  |
| LU3_L   | 3  | 13 | 13 | 57,123,923 | 57,165,330  | 13q21.1  | 13q21.1  |
| LU11_AD | 31 | 20 | 18 | 57,139,456 | 33,015,429  | 20q13.32 | 18q12.2  |
| LU11_L  | 5  | 20 | 18 | 57,139,489 | 33,018,221  | 20q13.32 | 18q12.2  |
| LU8_L   | 5  | 13 | 1  | 57,144,496 | 94,283,474  | 13q21.1  | 1p22.1   |
| LU11_AD | 70 | 20 | 12 | 57,146,778 | 48,805,071  | 20q13.32 | 12q13.11 |
| LU11_L  | 12 | 20 | 12 | 57,150,834 | 48,812,023  | 20q13.32 | 12q13.11 |
| LU3_L   | 3  | 13 | 13 | 57,165,330 | 57,123,923  | 13q21.1  | 13q21.1  |
| LU11_AD | 21 | 12 | 12 | 57,231,053 | 49,981,389  | 12q13.3  | 12q13.12 |
| LU11_AD | 11 | 12 | 12 | 57,237,471 | 57,622,271  | 12q13.3  | 12q13.3  |
| LU3_AD  | 4  | 6  | 8  | 57,254,007 | 119,240,584 | 6p11.2   | 8q24.12  |
| LU7_AD  | 5  | 12 | 12 | 57,333,866 | 50,296,348  | 12q13.3  | 12q13.12 |
| LU7_L   | 10 | 12 | 12 | 57,333,894 | 50,296,493  | 12q13.3  | 12q13.12 |
| LU7_L   | 27 | 12 | 12 | 57,370,003 | 50,298,886  | 12q13.3  | 12q13.12 |
| LU7_AD  | 11 | 12 | 12 | 57,380,081 | 50,295,173  | 12q13.3  | 12q13.12 |
| LU7_L   | 3  | 12 | 12 | 57,399,441 | 59,094,920  | 12q13.3  | 12q14.1  |
| LU4_AD  | 7  | 1  | 1  | 57,431,323 | 150,612,695 | 1p32.2   | 1q21.3   |
| LU4_AD  | 3  | 2  | 7  | 57,457,309 | 148,011,197 | 2p16.1   | 7q36.1   |
| LU3_L   | 5  | 6  | 6  | 57,494,526 | 57,525,248  | 6p11.2   | 6p11.2   |
| LU21_L  | 3  | 16 | 21 | 57,499,816 | 16,127,660  | 16q21    | 21q11.2  |
| LU3_L   | 5  | 6  | 6  | 57,525,248 | 57,494,526  | 6p11.2   | 6p11.2   |

|         |    |    |    |            |             |          |          |
|---------|----|----|----|------------|-------------|----------|----------|
| LU14_AD | 5  | 19 | 15 | 57,535,903 | 64,825,801  | 19q13.43 | 15q22.31 |
| LU12_AD | 3  | 13 | 1  | 57,545,478 | 226,803,858 | 13q21.1  | 1q42.12  |
| LU3_L   | 3  | 6  | 5  | 57,551,276 | 21,562,877  | 6p11.2   | 5p14.3   |
| LU11_AD | 60 | 12 | 12 | 57,607,343 | 58,158,759  | 12q13.3  | 12q14.1  |
| LU11_L  | 22 | 12 | 12 | 57,607,571 | 58,158,670  | 12q13.3  | 12q14.1  |
| LU11_AD | 29 | 12 | 12 | 57,618,162 | 49,972,040  | 12q13.3  | 12q13.12 |
| LU11_L  | 10 | 12 | 12 | 57,619,391 | 49,972,132  | 12q13.3  | 12q13.12 |
| LU11_AD | 17 | 12 | 18 | 57,621,982 | 35,828,399  | 12q13.3  | 18q12.2  |
| LU11_L  | 16 | 12 | 18 | 57,622,125 | 35,829,238  | 12q13.3  | 18q12.2  |
| LU11_AD | 11 | 12 | 12 | 57,622,271 | 57,237,471  | 12q13.3  | 12q13.3  |
| LU3_L   | 3  | 6  | 8  | 57,625,688 | 146,246,609 | 6p11.2   | 8q24.3   |
| LU21_L  | 5  | 6  | 8  | 57,626,636 | 146,249,883 | 6p11.2   | 8q24.3   |
| LU12_AD | 3  | 11 | 11 | 57,638,832 | 81,407,103  | 11q12.1  | 11q14.1  |
| LU21_L  | 10 | 8  | 8  | 57,768,653 | 57,057,994  | 8q12.1   | 8q12.1   |
| LU16_AD | 3  | 19 | 19 | 57,792,111 | 57,832,509  | 19q13.43 | 19q13.43 |
| LU12_L  | 4  | 14 | 6  | 57,799,594 | 42,119,223  | 14q22.3  | 6p21.1   |
| LU12_L  | 3  | 7  | 7  | 57,830,507 | 57,881,946  | 7p11.2   | 7p11.2   |
| LU16_AD | 3  | 19 | 19 | 57,832,509 | 57,792,111  | 19q13.43 | 19q13.43 |
| LU7_AD  | 20 | 12 | 12 | 57,870,542 | 58,925,373  | 12q13.3  | 12q14.1  |
| LU7_L   | 22 | 12 | 12 | 57,870,913 | 58,926,185  | 12q13.3  | 12q14.1  |
| LU7_L   | 7  | 12 | 12 | 57,873,673 | 56,256,361  | 12q13.3  | 12q13.2  |
| LU6_L   | 3  | 16 | 5  | 57,877,261 | 126,928,044 | 16q21    | 5q23.2   |
| LU21_AD | 20 | 8  | 8  | 57,880,248 | 56,918,641  | 8q12.1   | 8q12.1   |
| LU21_L  | 20 | 8  | 8  | 57,881,653 | 56,918,996  | 8q12.1   | 8q12.1   |
| LU12_L  | 3  | 7  | 7  | 57,881,946 | 57,830,507  | 7p11.2   | 7p11.2   |
| LU18_L  | 78 | 12 | 15 | 57,890,354 | 22,734,656  | 12q13.3  | 15q11.2  |
| LU18_AD | 68 | 12 | 15 | 57,890,928 | 22,734,569  | 12q13.3  | 15q11.2  |
| LU18_L  | 7  | 12 | 15 | 57,892,199 | 22,744,188  | 12q13.3  | 15q11.2  |
| LU18_L  | 3  | 7  | 9  | 57,897,363 | 45,428,097  | 7p11.2   | 9p11.2   |
| LU3_L   | 3  | 2  | 2  | 57,922,197 | 57,959,266  | 2p16.1   | 2p16.1   |
| LU4_AD  | 15 | 5  | 5  | 57,938,433 | 177,410,532 | 5q11.2   | 5q35.3   |
| LU4_AD  | 20 | 5  | 5  | 57,956,969 | 62,847,701  | 5q11.2   | 5q12.1   |
| LU3_L   | 3  | 2  | 2  | 57,959,266 | 57,922,197  | 2p16.1   | 2p16.1   |
| LU11_AD | 9  | 12 | 12 | 57,979,742 | 49,974,869  | 12q13.3  | 12q13.12 |
| LU11_AD | 13 | 12 | 12 | 57,979,851 | 56,417,131  | 12q13.3  | 12q13.2  |
| LU11_L  | 15 | 12 | 12 | 57,980,063 | 56,400,208  | 12q13.3  | 12q13.2  |
| LU11_L  | 4  | 12 | 12 | 57,980,189 | 56,417,287  | 12q13.3  | 12q13.2  |
| LU11_L  | 6  | 12 | 12 | 57,980,191 | 49,976,137  | 12q13.3  | 12q13.12 |
| LU11_AD | 13 | 12 | 12 | 57,983,275 | 56,399,730  | 12q13.3  | 12q13.2  |
| LU18_L  | 13 | 12 | 15 | 58,010,727 | 22,823,597  | 12q13.3  | 15q11.2  |
| LU18_AD | 7  | 12 | 15 | 58,012,149 | 22,820,909  | 12q13.3  | 15q11.2  |
| LU21_AD | 3  | 4  | 3  | 58,034,859 | 112,766,010 | 4q12     | 3q13.2   |
| LU18_AD | 3  | 12 | 5  | 58,051,467 | 40,325,801  | 12q13.3  | 5p13.1   |
| LU18_AD | 10 | 12 | 12 | 58,088,954 | 67,655,463  | 12q13.3  | 12q14.3  |

|         |    |    |    |            |             |          |          |
|---------|----|----|----|------------|-------------|----------|----------|
| LU18_L  | 15 | 12 | 12 | 58,090,821 | 67,655,328  | 12q13.3  | 12q14.3  |
| LU18_L  | 4  | 20 | 2  | 58,130,742 | 109,145,111 | 20q13.32 | 2q12.3   |
| LU11_L  | 17 | 12 | 12 | 58,136,937 | 49,867,972  | 12q14.1  | 12q13.12 |
| LU11_AD | 6  | 12 | 12 | 58,138,076 | 49,867,462  | 12q14.1  | 12q13.12 |
| LU11_L  | 24 | 12 | 12 | 58,139,664 | 48,482,618  | 12q14.1  | 12q13.11 |
| LU11_AD | 32 | 12 | 12 | 58,141,149 | 48,481,534  | 12q14.1  | 12q13.11 |
| LU11_AD | 21 | 12 | 12 | 58,142,128 | 49,963,749  | 12q14.1  | 12q13.12 |
| LU8_L   | 3  | 13 | 13 | 58,143,147 | 58,193,708  | 13q21.1  | 13q21.1  |
| LU3_AD  | 4  | 19 | 6  | 58,158,665 | 91,711,932  | 19q13.43 | 6q15     |
| LU11_L  | 22 | 12 | 12 | 58,158,670 | 57,607,571  | 12q14.1  | 12q13.3  |
| LU11_AD | 60 | 12 | 12 | 58,158,759 | 57,607,343  | 12q14.1  | 12q13.3  |
| LU20_AD | 4  | 14 | 4  | 58,189,674 | 100,952,226 | 14q23.1  | 4q23     |
| LU20_AD | 3  | 14 | 6  | 58,190,367 | 19,403,734  | 14q23.1  | 6p22.3   |
| LU8_L   | 3  | 13 | 13 | 58,193,708 | 58,143,147  | 13q21.1  | 13q21.1  |
| LU11_L  | 6  | 12 | 12 | 58,197,342 | 62,279,711  | 12q14.1  | 12q14.1  |
| LU11_L  | 6  | 12 | 18 | 58,200,101 | 36,025,545  | 12q14.1  | 18q12.2  |
| LU11_AD | 27 | 12 | 12 | 58,200,746 | 62,279,180  | 12q14.1  | 12q14.1  |
| LU21_L  | 4  | 17 | 17 | 58,203,552 | 60,353,876  | 17q23.1  | 17q23.2  |
| LU7_AD  | 4  | 12 | 12 | 58,203,736 | 53,495,541  | 12q14.1  | 12q13.13 |
| LU18_AD | 14 | 12 | 5  | 58,216,636 | 912,009     | 12q14.1  | 5p15.33  |
| LU18_L  | 11 | 12 | 5  | 58,217,077 | 912,090     | 12q14.1  | 5p15.33  |
| LU3_L   | 5  | 12 | 12 | 58,302,137 | 80,431,192  | 12q14.1  | 12q21.31 |
| LU4_AD  | 9  | 19 | 5  | 58,358,952 | 164,631,878 | 19q13.43 | 5q34     |
| LU3_L   | 3  | 12 | 7  | 58,362,689 | 63,980,437  | 12q14.1  | 7q11.21  |
| LU3_AD  | 4  | 12 | 12 | 58,427,110 | 47,113,140  | 12q14.1  | 12q13.11 |
| LU8_AD  | 3  | 11 | 3  | 58,432,327 | 112,245,854 | 11q12.1  | 3q13.2   |
| LU21_AD | 3  | 4  | 4  | 58,438,623 | 58,471,561  | 4q12     | 4q12     |
| LU21_AD | 3  | 4  | 4  | 58,471,561 | 58,438,623  | 4q12     | 4q12     |
| LU11_L  | 28 | 12 | 12 | 58,475,695 | 49,960,673  | 12q14.1  | 12q13.12 |
| LU11_AD | 28 | 12 | 12 | 58,475,763 | 49,960,632  | 12q14.1  | 12q13.12 |
| LU18_L  | 6  | 10 | 5  | 58,482,123 | 137,842,275 | 10q21.1  | 5q31.2   |
| LU4_L   | 3  | 19 | 23 | 58,506,514 | 152,506,042 | 19q13.43 | Xq28     |
| LU11_AD | 3  | 12 | 18 | 58,507,327 | 33,601,441  | 12q14.1  | 18q12.2  |
| LU11_L  | 6  | 12 | 12 | 58,510,894 | 62,226,849  | 12q14.1  | 12q14.1  |
| LU11_L  | 12 | 12 | 12 | 58,520,885 | 108,022,549 | 12q14.1  | 12q23.3  |
| LU8_AD  | 3  | 6  | 12 | 58,582,345 | 79,869,218  | 6p11.2   | 12q21.2  |
| LU21_AD | 5  | 6  | 19 | 58,583,054 | 41,967,424  | 6p11.2   | 19q13.2  |
| LU14_AD | 3  | 6  | 12 | 58,586,140 | 79,865,363  | 6p11.2   | 12q21.2  |
| LU7_L   | 7  | 12 | 7  | 58,665,692 | 2,178,343   | 12q14.1  | 7p22.3   |
| LU7_L   | 4  | 12 | 7  | 58,669,543 | 5,748,915   | 12q14.1  | 7p22.1   |
| LU7_L   | 6  | 12 | 12 | 58,671,917 | 67,840,585  | 12q14.1  | 12q15    |
| LU3_L   | 3  | 15 | 15 | 58,732,818 | 58,766,194  | 15q21.3  | 15q21.3  |
| LU3_L   | 3  | 15 | 15 | 58,766,194 | 58,732,818  | 15q21.3  | 15q21.3  |
| LU15_L  | 10 | 20 | 9  | 58,778,096 | 2,574,835   | 20q13.33 | 9p24.2   |

|         |    |    |    |            |             |          |          |
|---------|----|----|----|------------|-------------|----------|----------|
| LU20_AD | 3  | 15 | 15 | 58,800,704 | 58,830,996  | 15q21.3  | 15q21.3  |
| LU20_AD | 3  | 15 | 15 | 58,830,996 | 58,800,704  | 15q21.3  | 15q21.3  |
| LU11_L  | 16 | 12 | 12 | 58,848,881 | 43,210,338  | 12q14.1  | 12q12    |
| LU11_L  | 8  | 8  | 12 | 58,876,183 | 67,509,957  | 8q12.1   | 12q14.3  |
| LU7_AD  | 20 | 12 | 12 | 58,925,373 | 57,870,542  | 12q14.1  | 12q13.3  |
| LU7_L   | 22 | 12 | 12 | 58,926,185 | 57,870,913  | 12q14.1  | 12q13.3  |
| LU18_L  | 7  | 15 | 18 | 58,943,378 | 41,016,919  | 15q21.3  | 18q12.3  |
| LU11_L  | 7  | 8  | 8  | 58,956,326 | 140,117,413 | 8q12.1   | 8q24.3   |
| LU7_L   | 3  | 19 | 7  | 58,959,572 | 38,616,740  | 19q13.43 | 7p14.1   |
| LU11_L  | 11 | 8  | 8  | 58,972,249 | 37,748,224  | 8q12.1   | 8p11.23  |
| LU11_L  | 3  | 12 | 20 | 59,043,916 | 25,167,735  | 12q14.1  | 20p11.21 |
| LU7_L   | 3  | 12 | 12 | 59,094,920 | 57,399,441  | 12q14.1  | 12q13.3  |
| LU16_AD | 3  | 14 | 14 | 59,097,946 | 51,227,826  | 14q23.1  | 14q22.1  |
| LU4_AD  | 46 | 5  | 5  | 59,194,839 | 159,875,769 | 5q12.1   | 5q33.3   |
| LU4_L   | 3  | 5  | 5  | 59,195,496 | 159,881,337 | 5q12.1   | 5q33.3   |
| LU4_AD  | 37 | 5  | 5  | 59,198,365 | 172,152,688 | 5q12.1   | 5q35.1   |
| LU11_L  | 8  | 12 | 12 | 59,204,836 | 107,061,661 | 12q14.1  | 12q23.3  |
| LU11_L  | 11 | 12 | 12 | 59,207,505 | 69,187,038  | 12q14.1  | 12q15    |
| LU16_AD | 5  | 18 | 18 | 59,220,973 | 64,887,075  | 18q21.33 | 18q22.1  |
| LU11_L  | 6  | 12 | 12 | 59,228,968 | 56,333,358  | 12q14.1  | 12q13.2  |
| LU3_AD  | 3  | 8  | 8  | 59,241,435 | 59,271,916  | 8q12.1   | 8q12.1   |
| LU15_L  | 5  | 12 | 6  | 59,245,306 | 65,718,904  | 12q14.1  | 6q12     |
| LU12_L  | 4  | 12 | 12 | 59,246,818 | 85,190,113  | 12q14.1  | 12q21.31 |
| LU11_L  | 13 | 12 | 12 | 59,247,778 | 62,274,416  | 12q14.1  | 12q14.1  |
| LU11_L  | 36 | 12 | 12 | 59,249,825 | 62,643,644  | 12q14.1  | 12q14.1  |
| LU8_AD  | 3  | 12 | 14 | 59,252,436 | 22,705,105  | 12q14.1  | 14q11.2  |
| LU11_AD | 16 | 12 | 12 | 59,254,124 | 62,643,460  | 12q14.1  | 12q14.1  |
| LU11_L  | 3  | 8  | 18 | 59,264,818 | 35,959,837  | 8q12.1   | 18q12.2  |
| LU3_AD  | 3  | 8  | 8  | 59,271,916 | 59,241,435  | 8q12.1   | 8q12.1   |
| LU15_L  | 3  | 20 | 9  | 59,315,490 | 2,481,256   | 20q13.33 | 9p24.2   |
| LU21_AD | 3  | 4  | 1  | 59,327,319 | 161,220,671 | 4q12     | 1q23.3   |
| LU12_L  | 4  | 10 | 2  | 59,346,650 | 150,156,774 | 10q21.1  | 2q23.2   |
| LU4_L   | 22 | 16 | 16 | 59,413,795 | 61,514,920  | 16q21    | 16q21    |
| LU4_AD  | 34 | 16 | 16 | 59,415,898 | 61,512,924  | 16q21    | 16q21    |
| LU15_AD | 9  | 20 | 9  | 59,510,914 | 38,603,164  | 20q13.33 | 9p13.1   |
| LU15_AD | 12 | 20 | 9  | 59,512,602 | 33,537,594  | 20q13.33 | 9p13.3   |
| LU15_L  | 5  | 20 | 9  | 59,515,182 | 33,538,952  | 20q13.33 | 9p13.3   |
| LU4_L   | 15 | 16 | 16 | 59,537,790 | 63,174,449  | 16q21    | 16q21    |
| LU4_AD  | 30 | 16 | 16 | 59,538,863 | 63,172,589  | 16q21    | 16q21    |
| LU7_L   | 35 | 12 | 12 | 59,648,892 | 68,550,976  | 12q14.1  | 12q15    |
| LU7_AD  | 12 | 12 | 12 | 59,650,305 | 68,551,187  | 12q14.1  | 12q15    |
| LU14_L  | 3  | 11 | 12 | 59,693,414 | 103,059,241 | 11q12.1  | 12q23.2  |
| LU7_L   | 3  | 12 | 12 | 59,700,471 | 59,732,090  | 12q14.1  | 12q14.1  |
| LU7_L   | 3  | 12 | 12 | 59,711,537 | 65,857,971  | 12q14.1  | 12q14.3  |

|         |    |    |    |            |             |          |          |
|---------|----|----|----|------------|-------------|----------|----------|
| LU16_L  | 3  | 12 | 4  | 59,715,230 | 89,075,008  | 12q14.1  | 4q22.1   |
| LU4_AD  | 3  | 5  | 5  | 59,723,035 | 59,755,786  | 5q12.1   | 5q12.1   |
| LU7_L   | 3  | 12 | 12 | 59,732,090 | 59,700,471  | 12q14.1  | 12q14.1  |
| LU7_AD  | 12 | 12 | 12 | 59,734,548 | 62,270,969  | 12q14.1  | 12q14.1  |
| LU4_L   | 4  | 4  | 4  | 59,736,845 | 59,789,926  | 4q13.1   | 4q13.1   |
| LU7_L   | 20 | 12 | 12 | 59,738,839 | 62,267,606  | 12q14.1  | 12q14.1  |
| LU4_AD  | 3  | 5  | 5  | 59,755,786 | 59,723,035  | 5q12.1   | 5q12.1   |
| LU4_AD  | 3  | 18 | 18 | 59,788,008 | 59,817,614  | 18q21.33 | 18q21.33 |
| LU4_L   | 4  | 4  | 4  | 59,789,926 | 59,736,845  | 4q13.1   | 4q13.1   |
| LU21_AD | 4  | 20 | 3  | 59,793,396 | 126,880,110 | 20q13.33 | 3q21.3   |
| LU4_AD  | 3  | 18 | 18 | 59,817,614 | 59,788,008  | 18q21.33 | 18q21.33 |
| LU12_L  | 22 | 8  | 8  | 59,819,840 | 5,199,396   | 8q12.1   | 8p23.2   |
| LU11_AD | 4  | 20 | 20 | 59,837,967 | 61,911,946  | 20q13.33 | 20q13.33 |
| LU7_AD  | 8  | 12 | 12 | 59,865,956 | 67,603,725  | 12q14.1  | 12q14.3  |
| LU18_AD | 13 | 11 | 12 | 59,870,902 | 68,939,437  | 11q12.1  | 12q15    |
| LU18_L  | 15 | 11 | 12 | 59,871,820 | 68,938,258  | 11q12.1  | 12q15    |
| LU18_L  | 6  | 12 | 5  | 59,926,642 | 98,530,472  | 12q14.1  | 5q21.1   |
| LU18_AD | 4  | 12 | 13 | 59,928,682 | 93,748,243  | 12q14.1  | 13q31.3  |
| LU7_AD  | 3  | 5  | 6  | 59,955,703 | 85,429,073  | 5q12.1   | 6q14.3   |
| LU21_AD | 4  | 5  | 6  | 59,958,936 | 85,425,579  | 5q12.1   | 6q14.3   |
| LU21_L  | 7  | 20 | 20 | 60,015,839 | 55,007,907  | 20q13.33 | 20q13.31 |
| LU3_AD  | 5  | 1  | 1  | 60,026,653 | 60,059,393  | 1p32.1   | 1p32.1   |
| LU3_AD  | 5  | 1  | 1  | 60,059,393 | 60,026,653  | 1p32.1   | 1p32.1   |
| LU20_AD | 3  | 20 | 20 | 60,118,100 | 60,591,127  | 20q13.33 | 20q13.33 |
| LU11_AD | 17 | 20 | 12 | 60,145,128 | 42,996,032  | 20q13.33 | 12q12    |
| LU7_L   | 7  | 12 | 12 | 60,194,731 | 50,471,028  | 12q14.1  | 12q13.12 |
| LU18_L  | 3  | 2  | 2  | 60,239,737 | 60,285,268  | 2p16.1   | 2p16.1   |
| LU7_L   | 16 | 15 | 15 | 60,242,452 | 60,383,683  | 15q22.2  | 15q22.2  |
| LU4_AD  | 5  | 16 | 16 | 60,247,880 | 49,126,168  | 16q21    | 16q12.1  |
| LU4_L   | 9  | 16 | 16 | 60,248,294 | 49,126,661  | 16q21    | 16q12.1  |
| LU7_L   | 11 | 12 | 12 | 60,255,045 | 65,232,441  | 12q14.1  | 12q14.3  |
| LU7_AD  | 7  | 12 | 12 | 60,255,754 | 65,231,667  | 12q14.1  | 12q14.3  |
| LU3_L   | 6  | 12 | 12 | 60,257,490 | 77,140,802  | 12q14.1  | 12q21.2  |
| LU16_L  | 3  | 20 | 20 | 60,260,590 | 60,332,208  | 20q13.33 | 20q13.33 |
| LU7_L   | 4  | 12 | 12 | 60,262,483 | 56,117,616  | 12q14.1  | 12q13.2  |
| LU18_L  | 3  | 2  | 2  | 60,285,268 | 60,239,737  | 2p16.1   | 2p16.1   |
| LU16_L  | 3  | 20 | 20 | 60,332,208 | 60,260,590  | 20q13.33 | 20q13.33 |
| LU4_AD  | 11 | 16 | 16 | 60,344,786 | 65,274,020  | 16q21    | 16q21    |
| LU4_L   | 6  | 16 | 16 | 60,345,876 | 65,274,087  | 16q21    | 16q21    |
| LU21_L  | 4  | 17 | 17 | 60,353,876 | 58,203,552  | 17q23.2  | 17q23.1  |
| LU3_AD  | 4  | 14 | 14 | 60,374,266 | 60,410,633  | 14q23.1  | 14q23.1  |
| LU7_L   | 16 | 15 | 15 | 60,383,683 | 60,242,452  | 15q22.2  | 15q22.2  |
| LU3_AD  | 4  | 14 | 14 | 60,410,633 | 60,374,266  | 14q23.1  | 14q23.1  |
| LU7_L   | 8  | 12 | 12 | 60,424,208 | 62,221,966  | 12q14.1  | 12q14.1  |

|         |    |    |    |            |             |          |          |
|---------|----|----|----|------------|-------------|----------|----------|
| LU7_L   | 4  | 12 | 12 | 60,426,195 | 64,797,180  | 12q14.1  | 12q14.2  |
| LU11_AD | 17 | 2  | 2  | 60,432,276 | 124,951,130 | 2p16.1   | 2q14.3   |
| LU6_AD  | 7  | 1  | 1  | 60,438,612 | 61,304,180  | 1p32.1   | 1p31.3   |
| LU15_AD | 12 | 20 | 9  | 60,517,764 | 34,967,382  | 20q13.33 | 9p13.3   |
| LU15_L  | 5  | 20 | 9  | 60,520,408 | 34,965,996  | 20q13.33 | 9p13.3   |
| LU12_L  | 12 | 8  | 8  | 60,541,636 | 70,862,778  | 8q12.1   | 8q13.3   |
| LU20_AD | 3  | 20 | 20 | 60,591,127 | 60,118,100  | 20q13.33 | 20q13.33 |
| LU14_AD | 6  | 12 | 12 | 60,732,060 | 49,644,589  | 12q14.1  | 12q13.12 |
| LU3_AD  | 3  | 1  | 1  | 60,735,369 | 60,766,934  | 1p32.1   | 1p32.1   |
| LU16_L  | 3  | 18 | 17 | 60,759,029 | 66,256,707  | 18q21.33 | 17q24.2  |
| LU21_L  | 10 | 5  | 5  | 60,760,783 | 57,922,349  | 5q12.1   | 5q11.2   |
| LU21_AD | 3  | 5  | 5  | 60,762,052 | 57,924,191  | 5q12.1   | 5q11.2   |
| LU3_AD  | 3  | 1  | 1  | 60,766,934 | 60,735,369  | 1p32.1   | 1p32.1   |
| LU7_L   | 7  | 12 | 2  | 60,789,225 | 243,153,672 | 12q14.1  | 2q37.3   |
| LU7_AD  | 10 | 12 | 12 | 60,801,189 | 56,311,080  | 12q14.1  | 12q13.2  |
| LU4_AD  | 5  | 11 | 11 | 60,809,757 | 60,844,646  | 11q12.2  | 11q12.2  |
| LU4_AD  | 5  | 11 | 11 | 60,844,646 | 60,809,757  | 11q12.2  | 11q12.2  |
| LU3_AD  | 3  | 3  | 3  | 60,864,997 | 60,902,073  | 3p14.2   | 3p14.2   |
| LU3_AD  | 3  | 3  | 3  | 60,902,073 | 60,864,997  | 3p14.2   | 3p14.2   |
| LU18_L  | 3  | 16 | 16 | 60,906,105 | 60,956,480  | 16q21    | 16q21    |
| LU14_AD | 4  | 18 | 11 | 60,927,738 | 112,027,682 | 18q21.33 | 11q23.1  |
| LU14_L  | 6  | 18 | 11 | 60,928,545 | 112,024,650 | 18q21.33 | 11q23.1  |
| LU18_L  | 3  | 16 | 16 | 60,956,480 | 60,906,105  | 16q21    | 16q21    |
| LU15_AD | 13 | 17 | 17 | 61,048,368 | 61,083,255  | 17q23.2  | 17q23.2  |
| LU15_L  | 16 | 17 | 17 | 61,049,107 | 61,083,324  | 17q23.2  | 17q23.2  |
| LU5_AD  | 3  | 1  | 1  | 61,059,078 | 61,091,209  | 1p32.1   | 1p32.1   |
| LU15_AD | 13 | 17 | 17 | 61,083,255 | 61,048,368  | 17q23.2  | 17q23.2  |
| LU15_L  | 16 | 17 | 17 | 61,083,324 | 61,049,107  | 17q23.2  | 17q23.2  |
| LU5_AD  | 3  | 1  | 1  | 61,091,209 | 61,059,078  | 1p32.1   | 1p32.1   |
| LU11_AD | 4  | 2  | 2  | 61,115,901 | 61,164,450  | 2p16.1   | 2p16.1   |
| LU11_AD | 3  | 2  | 2  | 61,116,819 | 124,954,660 | 2p16.1   | 2q14.3   |
| LU4_AD  | 5  | 5  | 5  | 61,148,207 | 172,423,822 | 5q12.1   | 5q35.1   |
| LU11_AD | 3  | 2  | 2  | 61,163,918 | 124,957,141 | 2p16.1   | 2q14.3   |
| LU11_AD | 4  | 2  | 2  | 61,164,450 | 61,115,901  | 2p16.1   | 2p16.1   |
| LU7_L   | 5  | 12 | 12 | 61,205,776 | 62,008,676  | 12q14.1  | 12q14.1  |
| LU7_AD  | 11 | 12 | 12 | 61,207,682 | 68,832,863  | 12q14.1  | 12q15    |
| LU7_L   | 17 | 12 | 12 | 61,207,721 | 68,832,801  | 12q14.1  | 12q15    |
| LU7_AD  | 8  | 12 | 12 | 61,209,087 | 62,005,109  | 12q14.1  | 12q14.1  |
| LU7_L   | 7  | 12 | 12 | 61,213,228 | 65,454,342  | 12q14.1  | 12q14.3  |
| LU18_AD | 3  | 5  | 5  | 61,249,422 | 61,281,287  | 5q12.1   | 5q12.1   |
| LU20_AD | 5  | 16 | 16 | 61,262,330 | 61,296,998  | 16q21    | 16q21    |
| LU4_AD  | 5  | 16 | 16 | 61,268,802 | 202,449     | 16q21    | 16p13.3  |
| LU18_AD | 3  | 5  | 5  | 61,281,287 | 61,249,422  | 5q12.1   | 5q12.1   |
| LU20_AD | 5  | 16 | 16 | 61,296,998 | 61,262,330  | 16q21    | 16q21    |

|         |    |    |    |            |             |          |          |
|---------|----|----|----|------------|-------------|----------|----------|
| LU6_AD  | 7  | 1  | 1  | 61,304,180 | 60,438,612  | 1p31.3   | 1p32.1   |
| LU7_AD  | 16 | 12 | 12 | 61,328,781 | 66,652,298  | 12q14.1  | 12q14.3  |
| LU7_L   | 38 | 12 | 12 | 61,329,111 | 66,652,821  | 12q14.1  | 12q14.3  |
| LU7_AD  | 8  | 12 | 12 | 61,332,863 | 72,054,181  | 12q14.1  | 12q21.1  |
| LU7_L   | 22 | 12 | 12 | 61,334,496 | 72,053,851  | 12q14.1  | 12q21.1  |
| LU8_L   | 4  | 15 | 6  | 61,413,603 | 68,970,109  | 15q22.2  | 6q12     |
| LU8_L   | 4  | 15 | 6  | 61,441,840 | 68,992,805  | 15q22.2  | 6q12     |
| LU4_AD  | 34 | 16 | 16 | 61,512,924 | 59,415,898  | 16q21    | 16q21    |
| LU4_L   | 22 | 16 | 16 | 61,514,920 | 59,413,795  | 16q21    | 16q21    |
| LU7_AD  | 4  | 12 | 12 | 61,518,525 | 63,069,998  | 12q14.1  | 12q14.1  |
| LU7_L   | 4  | 12 | 12 | 61,518,874 | 63,068,146  | 12q14.1  | 12q14.1  |
| LU7_AD  | 4  | 12 | 12 | 61,522,655 | 56,361,722  | 12q14.1  | 12q13.2  |
| LU18_L  | 3  | 10 | 4  | 61,525,378 | 174,025,280 | 10q21.2  | 4q34.1   |
| LU3_AD  | 19 | 17 | 17 | 61,535,356 | 61,566,155  | 17q23.3  | 17q23.3  |
| LU21_AD | 5  | 4  | 4  | 61,541,030 | 90,989,640  | 4q13.1   | 4q22.1   |
| LU7_AD  | 6  | 12 | 12 | 61,543,765 | 62,958,837  | 12q14.1  | 12q14.1  |
| LU7_L   | 7  | 12 | 12 | 61,543,938 | 62,959,491  | 12q14.1  | 12q14.1  |
| LU4_AD  | 13 | 16 | 16 | 61,544,697 | 63,207,865  | 16q21    | 16q21    |
| LU4_L   | 5  | 16 | 16 | 61,546,375 | 63,205,561  | 16q21    | 16q21    |
| LU4_AD  | 13 | 16 | 16 | 61,546,497 | 51,028,763  | 16q21    | 16q12.1  |
| LU7_L   | 25 | 12 | 12 | 61,561,066 | 66,948,267  | 12q14.1  | 12q14.3  |
| LU3_AD  | 19 | 17 | 17 | 61,566,155 | 61,535,356  | 17q23.3  | 17q23.3  |
| LU3_L   | 7  | 8  | 10 | 61,597,624 | 119,981,475 | 8q12.2   | 10q26.11 |
| LU7_AD  | 15 | 12 | 10 | 61,603,349 | 24,416,320  | 12q14.1  | 10p12.2  |
| LU7_L   | 38 | 12 | 10 | 61,604,354 | 24,416,232  | 12q14.1  | 10p12.2  |
| LU7_L   | 7  | 12 | 15 | 61,641,000 | 41,398,267  | 12q14.1  | 15q15.1  |
| LU4_AD  | 10 | 16 | 16 | 61,650,198 | 62,112,798  | 16q21    | 16q21    |
| LU21_L  | 4  | 18 | 18 | 61,653,599 | 61,684,080  | 18q22.1  | 18q22.1  |
| LU12_AD | 4  | 13 | 2  | 61,665,368 | 204,829,287 | 13q21.2  | 2q33.2   |
| LU7_L   | 6  | 12 | 12 | 61,677,639 | 69,079,054  | 12q14.1  | 12q15    |
| LU21_L  | 4  | 18 | 18 | 61,684,080 | 61,653,599  | 18q22.1  | 18q22.1  |
| LU3_AD  | 4  | 13 | 14 | 61,795,268 | 23,178,718  | 13q21.2  | 14q11.2  |
| LU7_L   | 12 | 12 | 12 | 61,796,587 | 68,982,333  | 12q14.1  | 12q15    |
| LU3_L   | 3  | 11 | 24 | 61,816,741 | 2,754,821   | 11q12.3  | Yp11.31  |
| LU3_L   | 3  | 7  | 1  | 61,818,197 | 242,482,271 | 7q11.21  | 1q43     |
| LU12_AD | 3  | 11 | 14 | 61,818,759 | 28,888,290  | 11q12.3  | 14q12    |
| LU16_AD | 4  | 8  | 8  | 61,821,052 | 61,854,966  | 8q12.2   | 8q12.2   |
| LU16_AD | 4  | 8  | 8  | 61,854,966 | 61,821,052  | 8q12.2   | 8q12.2   |
| LU7_L   | 4  | 12 | 7  | 61,868,602 | 50,449,946  | 12q14.1  | 7p12.2   |
| LU15_AD | 4  | 20 | 9  | 61,899,660 | 42,298,738  | 20q13.33 | 9p12     |
| LU11_AD | 4  | 20 | 20 | 61,911,946 | 59,837,967  | 20q13.33 | 20q13.33 |
| LU3_L   | 3  | 18 | 18 | 61,912,358 | 61,946,725  | 18q22.1  | 18q22.1  |
| LU7_L   | 4  | 12 | 7  | 61,929,028 | 38,100,591  | 12q14.1  | 7p14.1   |
| LU7_AD  | 5  | 12 | 7  | 61,930,214 | 38,099,573  | 12q14.1  | 7p14.1   |



|         |    |    |    |            |             |          |          |
|---------|----|----|----|------------|-------------|----------|----------|
| LU4_L   | 3  | 10 | 10 | 61,936,621 | 61,966,666  | 10q21.2  | 10q21.2  |
| LU4_AD  | 8  | 5  | 5  | 61,937,485 | 172,730,332 | 5q12.1   | 5q35.1   |
| LU3_L   | 3  | 18 | 18 | 61,946,725 | 61,912,358  | 18q22.1  | 18q22.1  |
| LU11_AD | 24 | 12 | 12 | 61,949,808 | 69,477,514  | 12q14.1  | 12q15    |
| LU11_L  | 19 | 12 | 12 | 61,950,290 | 69,477,169  | 12q14.1  | 12q15    |
| LU4_L   | 3  | 10 | 10 | 61,966,666 | 61,936,621  | 10q21.2  | 10q21.2  |
| LU7_L   | 8  | 12 | 12 | 61,971,508 | 68,456,708  | 12q14.1  | 12q15    |
| LU7_AD  | 8  | 12 | 12 | 62,005,109 | 61,209,087  | 12q14.1  | 12q14.1  |
| LU7_L   | 5  | 12 | 12 | 62,008,676 | 61,205,776  | 12q14.1  | 12q14.1  |
| LU16_AD | 5  | 23 | 23 | 62,045,184 | 62,075,195  | Xq11.1   | Xq11.1   |
| LU4_AD  | 13 | 16 | 16 | 62,073,284 | 34,419,833  | 16q21    | 16p11.2  |
| LU16_AD | 5  | 23 | 23 | 62,075,195 | 62,045,184  | Xq11.1   | Xq11.1   |
| LU4_AD  | 10 | 16 | 16 | 62,112,798 | 61,650,198  | 16q21    | 16q21    |
| LU4_L   | 13 | 16 | 16 | 62,131,211 | 4,180,489   | 16q21    | 16p13.3  |
| LU4_AD  | 12 | 16 | 16 | 62,133,074 | 4,179,466   | 16q21    | 16p13.3  |
| LU11_L  | 7  | 12 | 12 | 62,157,367 | 48,895,287  | 12q14.1  | 12q13.11 |
| LU14_AD | 13 | 12 | 12 | 62,171,142 | 62,244,310  | 12q14.1  | 12q14.1  |
| LU4_AD  | 26 | 16 | 1  | 62,174,891 | 22,844,213  | 16q21    | 1p36.12  |
| LU4_L   | 10 | 16 | 1  | 62,176,373 | 22,843,106  | 16q21    | 1p36.12  |
| LU4_AD  | 9  | 5  | 5  | 62,214,523 | 63,092,399  | 5q12.1   | 5q12.2   |
| LU7_L   | 12 | 12 | 12 | 62,216,645 | 66,508,625  | 12q14.1  | 12q14.3  |
| LU15_AD | 5  | 14 | 9  | 62,218,806 | 21,974,528  | 14q23.2  | 9p21.3   |
| LU7_L   | 8  | 12 | 12 | 62,221,966 | 60,424,208  | 12q14.1  | 12q14.1  |
| LU11_L  | 5  | 12 | 12 | 62,225,898 | 49,517,782  | 12q14.1  | 12q13.12 |
| LU11_L  | 6  | 12 | 12 | 62,226,849 | 58,510,894  | 12q14.1  | 12q14.1  |
| LU14_AD | 15 | 12 | 12 | 62,233,799 | 48,024,712  | 12q14.1  | 12q13.11 |
| LU14_AD | 13 | 12 | 12 | 62,244,310 | 62,171,142  | 12q14.1  | 12q14.1  |
| LU7_L   | 20 | 12 | 12 | 62,267,606 | 59,738,839  | 12q14.1  | 12q14.1  |
| LU7_AD  | 12 | 12 | 12 | 62,270,969 | 59,734,548  | 12q14.1  | 12q14.1  |
| LU11_L  | 13 | 12 | 12 | 62,274,416 | 59,247,778  | 12q14.1  | 12q14.1  |
| LU11_AD | 27 | 12 | 12 | 62,279,180 | 58,200,746  | 12q14.1  | 12q14.1  |
| LU11_L  | 6  | 12 | 12 | 62,279,711 | 58,197,342  | 12q14.1  | 12q14.1  |
| LU3_L   | 3  | 6  | 3  | 62,314,175 | 161,872,892 | 6q11.1   | 3q26.1   |
| LU18_L  | 3  | 15 | 12 | 62,503,884 | 69,596,779  | 15q22.2  | 12q15    |
| LU8_L   | 3  | 15 | 15 | 62,505,606 | 51,576,768  | 15q22.2  | 15q21.2  |
| LU4_AD  | 3  | 13 | 9  | 62,517,155 | 108,557,895 | 13q21.31 | 9q31.2   |
| LU4_L   | 4  | 15 | 15 | 62,533,077 | 72,963,342  | 15q22.2  | 15q24.1  |
| LU7_AD  | 9  | 12 | 12 | 62,544,739 | 55,242,182  | 12q14.1  | 12q13.2  |
| LU7_L   | 16 | 12 | 12 | 62,547,612 | 55,239,310  | 12q14.1  | 12q13.2  |
| LU7_AD  | 18 | 12 | 12 | 62,550,791 | 66,656,328  | 12q14.1  | 12q14.3  |
| LU7_L   | 43 | 12 | 12 | 62,551,146 | 66,655,901  | 12q14.1  | 12q14.3  |
| LU18_L  | 3  | 15 | 15 | 62,560,964 | 78,218,939  | 15q22.2  | 15q24.3  |
| LU18_L  | 3  | 15 | 15 | 62,561,594 | 22,737,006  | 15q22.2  | 15q11.2  |
| LU20_AD | 4  | 15 | 2  | 62,567,131 | 71,443,018  | 15q22.2  | 2p13.3   |

|         |    |    |    |            |             |          |          |
|---------|----|----|----|------------|-------------|----------|----------|
| LU18_L  | 4  | 15 | 2  | 62,567,291 | 71,447,017  | 15q22.2  | 2p13.3   |
| LU20_AD | 5  | 5  | 5  | 62,575,289 | 62,606,590  | 5q12.1   | 5q12.1   |
| LU11_AD | 35 | 12 | 18 | 62,580,187 | 36,142,124  | 12q14.1  | 18q12.2  |
| LU11_L  | 64 | 12 | 18 | 62,580,465 | 36,140,408  | 12q14.1  | 18q12.2  |
| LU11_L  | 4  | 12 | 18 | 62,586,101 | 35,884,870  | 12q14.1  | 18q12.2  |
| LU20_AD | 5  | 5  | 5  | 62,606,590 | 62,575,289  | 5q12.1   | 5q12.1   |
| LU11_AD | 16 | 12 | 12 | 62,643,460 | 59,254,124  | 12q14.1  | 12q14.1  |
| LU11_L  | 36 | 12 | 12 | 62,643,644 | 59,249,825  | 12q14.1  | 12q14.1  |
| LU21_AD | 3  | 1  | 5  | 62,644,560 | 24,308,247  | 1p31.3   | 5p14.2   |
| LU4_AD  | 3  | 1  | 15 | 62,648,657 | 51,575,010  | 1p31.3   | 15q21.2  |
| LU5_L   | 3  | 13 | 13 | 62,649,270 | 62,679,758  | 13q21.31 | 13q21.31 |
| LU7_L   | 38 | 12 | 12 | 62,665,915 | 66,604,319  | 12q14.1  | 12q14.3  |
| LU7_AD  | 21 | 12 | 12 | 62,666,079 | 66,602,763  | 12q14.1  | 12q14.3  |
| LU16_L  | 4  | 1  | 13 | 62,676,376 | 102,669,922 | 1p31.3   | 13q33.1  |
| LU5_L   | 3  | 13 | 13 | 62,679,758 | 62,649,270  | 13q21.31 | 13q21.31 |
| LU4_AD  | 7  | 5  | 5  | 62,701,103 | 63,964,192  | 5q12.1   | 5q12.3   |
| LU7_AD  | 23 | 12 | 12 | 62,740,699 | 67,966,155  | 12q14.1  | 12q15    |
| LU7_L   | 35 | 12 | 12 | 62,744,859 | 67,957,086  | 12q14.1  | 12q15    |
| LU20_L  | 3  | 4  | 4  | 62,785,367 | 62,816,579  | 4q13.1   | 4q13.1   |
| LU4_AD  | 3  | 2  | 2  | 62,792,267 | 62,828,381  | 2p15     | 2p15     |
| LU4_AD  | 22 | 5  | 5  | 62,793,112 | 159,905,418 | 5q12.1   | 5q34     |
| LU20_L  | 3  | 4  | 4  | 62,816,579 | 62,785,367  | 4q13.1   | 4q13.1   |
| LU4_AD  | 3  | 2  | 2  | 62,828,381 | 62,792,267  | 2p15     | 2p15     |
| LU3_L   | 6  | 12 | 12 | 62,828,795 | 76,954,885  | 12q14.1  | 12q21.2  |
| LU4_AD  | 13 | 16 | 16 | 62,837,648 | 62,868,477  | 16q21    | 16q21    |
| LU20_AD | 4  | 5  | 5  | 62,843,996 | 62,878,993  | 5q12.1   | 5q12.1   |
| LU4_AD  | 20 | 5  | 5  | 62,847,701 | 57,956,969  | 5q12.1   | 5q11.2   |
| LU7_L   | 3  | 14 | 14 | 62,848,403 | 62,881,766  | 14q23.2  | 14q23.2  |
| LU4_AD  | 13 | 16 | 16 | 62,868,477 | 62,837,648  | 16q21    | 16q21    |
| LU20_AD | 4  | 5  | 5  | 62,878,993 | 62,843,996  | 5q12.1   | 5q12.1   |
| LU7_L   | 3  | 14 | 14 | 62,881,766 | 62,848,403  | 14q23.2  | 14q23.2  |
| LU7_AD  | 6  | 12 | 12 | 62,958,837 | 61,543,765  | 12q14.1  | 12q14.1  |
| LU7_L   | 7  | 12 | 12 | 62,959,491 | 61,543,938  | 12q14.1  | 12q14.1  |
| LU7_L   | 7  | 12 | 12 | 62,963,167 | 50,908,351  | 12q14.1  | 12q13.12 |
| LU7_AD  | 3  | 12 | 12 | 62,964,123 | 50,908,134  | 12q14.1  | 12q13.12 |
| LU3_L   | 4  | 13 | 13 | 63,000,595 | 63,751,107  | 13q21.31 | 13q21.31 |
| LU7_AD  | 6  | 12 | 12 | 63,034,237 | 49,753,600  | 12q14.1  | 12q13.12 |
| LU7_L   | 3  | 12 | 12 | 63,036,316 | 49,752,917  | 12q14.1  | 12q13.12 |
| LU7_L   | 5  | 12 | 12 | 63,037,541 | 50,567,351  | 12q14.1  | 12q13.12 |
| LU7_L   | 4  | 12 | 12 | 63,068,146 | 61,518,874  | 12q14.1  | 12q14.1  |
| LU18_L  | 21 | 12 | 15 | 63,068,945 | 20,005,375  | 12q14.1  | 15q11.1  |
| LU18_AD | 18 | 12 | 15 | 63,069,409 | 20,005,956  | 12q14.1  | 15q11.1  |
| LU7_AD  | 4  | 12 | 12 | 63,069,998 | 61,518,525  | 12q14.1  | 12q14.1  |
| LU7_L   | 4  | 12 | 12 | 63,070,689 | 49,739,903  | 12q14.1  | 12q13.12 |

|         |    |    |    |            |             |         |          |
|---------|----|----|----|------------|-------------|---------|----------|
| LU4_AD  | 10 | 5  | 18 | 63,087,582 | 20,910,432  | 5q12.2  | 18q11.2  |
| LU4_AD  | 9  | 5  | 5  | 63,092,399 | 62,214,523  | 5q12.2  | 5q12.1   |
| LU8_L   | 3  | 1  | 1  | 63,111,424 | 63,141,907  | 1p31.3  | 1p31.3   |
| LU8_L   | 3  | 1  | 1  | 63,141,907 | 63,111,424  | 1p31.3  | 1p31.3   |
| LU4_AD  | 30 | 16 | 16 | 63,172,589 | 59,538,863  | 16q21   | 16q21    |
| LU4_L   | 15 | 16 | 16 | 63,174,449 | 59,537,790  | 16q21   | 16q21    |
| LU5_AD  | 4  | 4  | 4  | 63,197,324 | 63,233,874  | 4q13.1  | 4q13.1   |
| LU18_L  | 4  | 7  | 1  | 63,199,342 | 224,144,763 | 7q11.21 | 1q42.11  |
| LU4_L   | 5  | 16 | 16 | 63,205,561 | 61,546,375  | 16q21   | 16q21    |
| LU20_L  | 3  | 7  | 7  | 63,205,584 | 75,705,631  | 7q11.21 | 7q11.23  |
| LU4_AD  | 6  | 16 | 16 | 63,206,339 | 63,646,629  | 16q21   | 16q21    |
| LU4_AD  | 13 | 16 | 16 | 63,207,865 | 61,544,697  | 16q21   | 16q21    |
| LU5_AD  | 4  | 4  | 4  | 63,233,874 | 63,197,324  | 4q13.1  | 4q13.1   |
| LU18_AD | 4  | 12 | 6  | 63,399,661 | 157,720,178 | 12q14.2 | 6q25.3   |
| LU16_AD | 3  | 10 | 10 | 63,411,913 | 63,457,661  | 10q21.2 | 10q21.2  |
| LU14_L  | 6  | 14 | 14 | 63,419,187 | 63,452,950  | 14q23.2 | 14q23.2  |
| LU3_L   | 3  | 8  | 8  | 63,432,562 | 63,463,937  | 8q12.3  | 8q12.3   |
| LU14_L  | 6  | 14 | 14 | 63,452,950 | 63,419,187  | 14q23.2 | 14q23.2  |
| LU16_AD | 3  | 10 | 10 | 63,457,661 | 63,411,913  | 10q21.2 | 10q21.2  |
| LU7_AD  | 16 | 12 | 12 | 63,460,832 | 55,192,223  | 12q14.2 | 12q13.2  |
| LU7_L   | 20 | 12 | 12 | 63,460,887 | 55,192,055  | 12q14.2 | 12q13.2  |
| LU3_L   | 3  | 8  | 8  | 63,463,937 | 63,432,562  | 8q12.3  | 8q12.3   |
| LU7_AD  | 16 | 12 | 12 | 63,475,164 | 72,058,482  | 12q14.2 | 12q21.1  |
| LU7_L   | 49 | 12 | 12 | 63,475,829 | 72,058,445  | 12q14.2 | 12q21.1  |
| LU3_AD  | 4  | 12 | 12 | 63,492,744 | 47,088,900  | 12q14.2 | 12q13.11 |
| LU7_AD  | 6  | 6  | 7  | 63,557,035 | 99,558,200  | 6q12    | 7q22.1   |
| LU16_L  | 3  | 7  | 5  | 63,573,378 | 34,182,840  | 7q11.21 | 5p13.2   |
| LU4_AD  | 3  | 23 | 23 | 63,581,870 | 63,619,922  | Xq11.2  | Xq11.2   |
| LU18_L  | 12 | 12 | 5  | 63,584,320 | 1,008,524   | 12q14.2 | 5p15.33  |
| LU18_AD | 14 | 12 | 5  | 63,584,827 | 1,009,042   | 12q14.2 | 5p15.33  |
| LU18_AD | 14 | 12 | 12 | 63,606,552 | 71,161,018  | 12q14.2 | 12q15    |
| LU4_AD  | 3  | 23 | 23 | 63,619,922 | 63,581,870  | Xq11.2  | Xq11.2   |
| LU4_AD  | 6  | 16 | 16 | 63,646,629 | 63,206,339  | 16q21   | 16q21    |
| LU11_AD | 3  | 11 | 12 | 63,679,813 | 94,534,600  | 11q13.1 | 12q22    |
| LU4_AD  | 8  | 16 | 1  | 63,708,924 | 48,145,042  | 16q21   | 1p33     |
| LU8_L   | 3  | 2  | 2  | 63,713,917 | 63,748,849  | 2p15    | 2p15     |
| LU20_AD | 3  | 1  | 1  | 63,714,567 | 63,744,691  | 1p31.3  | 1p31.3   |
| LU3_L   | 3  | 10 | 10 | 63,719,135 | 63,749,371  | 10q21.2 | 10q21.2  |
| LU18_L  | 24 | 12 | 2  | 63,743,104 | 165,844,314 | 12q14.2 | 2q24.3   |
| LU18_L  | 67 | 12 | 15 | 63,743,275 | 21,920,313  | 12q14.2 | 15q11.2  |
| LU18_AD | 58 | 12 | 15 | 63,743,312 | 21,921,562  | 12q14.2 | 15q11.2  |
| LU18_AD | 15 | 12 | 15 | 63,743,784 | 21,924,425  | 12q14.2 | 15q11.2  |
| LU20_AD | 3  | 1  | 1  | 63,744,691 | 63,714,567  | 1p31.3  | 1p31.3   |
| LU18_AD | 35 | 12 | 2  | 63,744,775 | 165,842,686 | 12q14.2 | 2q24.3   |

|         |    |    |    |            |            |          |          |
|---------|----|----|----|------------|------------|----------|----------|
| LU8_L   | 3  | 2  | 2  | 63,748,849 | 63,713,917 | 2p15     | 2p15     |
| LU3_L   | 3  | 10 | 10 | 63,749,371 | 63,719,135 | 10q21.2  | 10q21.2  |
| LU3_L   | 4  | 13 | 13 | 63,751,107 | 63,000,595 | 13q21.31 | 13q21.31 |
| LU7_L   | 10 | 12 | 7  | 63,825,095 | 28,844,035 | 12q14.2  | 7p14.3   |
| LU7_AD  | 10 | 12 | 7  | 63,825,420 | 28,844,630 | 12q14.2  | 7p14.3   |
| LU7_L   | 13 | 12 | 7  | 63,827,252 | 28,846,579 | 12q14.2  | 7p14.3   |
| LU18_AD | 9  | 12 | 12 | 63,838,247 | 69,532,460 | 12q14.2  | 12q15    |
| LU11_L  | 5  | 12 | 12 | 63,874,075 | 69,428,257 | 12q14.2  | 12q15    |
| LU11_AD | 6  | 12 | 12 | 63,874,145 | 69,427,220 | 12q14.2  | 12q15    |
| LU18_L  | 24 | 12 | 5  | 63,933,248 | 544,248    | 12q14.2  | 5p15.33  |
| LU18_AD | 34 | 12 | 5  | 63,933,251 | 543,683    | 12q14.2  | 5p15.33  |
| LU11_L  | 11 | 12 | 12 | 63,938,054 | 69,641,045 | 12q14.2  | 12q15    |
| LU11_AD | 21 | 12 | 12 | 63,941,052 | 69,637,825 | 12q14.2  | 12q15    |
| LU4_AD  | 7  | 5  | 5  | 63,964,192 | 62,701,103 | 5q12.3   | 5q12.1   |
| LU11_AD | 23 | 12 | 12 | 63,977,662 | 83,848,726 | 12q14.2  | 12q21.31 |
| LU11_AD | 36 | 12 | 12 | 63,977,781 | 66,179,539 | 12q14.2  | 12q14.3  |
| LU11_L  | 4  | 12 | 12 | 63,980,250 | 66,179,901 | 12q14.2  | 12q14.3  |
| LU3_L   | 3  | 7  | 12 | 63,980,437 | 58,362,689 | 7q11.21  | 12q14.1  |
| LU4_AD  | 25 | 16 | 16 | 64,004,909 | 1,724,150  | 16q21    | 16p13.3  |
| LU4_L   | 8  | 16 | 16 | 64,006,946 | 1,722,558  | 16q21    | 16p13.3  |
| LU6_L   | 8  | 8  | 8  | 64,043,895 | 64,769,124 | 8q12.3   | 8q12.3   |
| LU6_AD  | 7  | 8  | 8  | 64,045,180 | 64,767,197 | 8q12.3   | 8q12.3   |
| LU20_L  | 3  | 4  | 10 | 64,052,718 | 37,567,962 | 4q13.1   | 10p11.21 |
| LU4_AD  | 3  | 17 | 17 | 64,092,050 | 64,128,756 | 17q24.1  | 17q24.1  |
| LU4_AD  | 3  | 17 | 17 | 64,128,756 | 64,092,050 | 17q24.1  | 17q24.1  |
| LU21_AD | 3  | 8  | 8  | 64,182,584 | 64,222,298 | 8q12.3   | 8q12.3   |
| LU18_AD | 4  | 12 | 5  | 64,208,194 | 2,822,963  | 12q14.2  | 5p15.33  |
| LU7_L   | 7  | 12 | 7  | 64,216,120 | 2,600,065  | 12q14.2  | 7p22.3   |
| LU21_AD | 3  | 8  | 8  | 64,222,298 | 64,182,584 | 8q12.3   | 8q12.3   |
| LU16_AD | 12 | 12 | 14 | 64,239,308 | 67,399,030 | 12q14.2  | 14q23.3  |
| LU18_AD | 6  | 12 | 5  | 64,268,838 | 4,784,833  | 12q14.2  | 5p15.32  |
| LU16_AD | 26 | 12 | 12 | 64,280,551 | 76,601,352 | 12q14.2  | 12q21.2  |
| LU16_L  | 4  | 12 | 12 | 64,284,063 | 76,603,666 | 12q14.2  | 12q21.2  |
| LU18_AD | 22 | 12 | 12 | 64,327,029 | 64,601,499 | 12q14.2  | 12q14.2  |
| LU18_L  | 30 | 12 | 12 | 64,331,032 | 64,600,052 | 12q14.2  | 12q14.2  |
| LU18_AD | 7  | 12 | 15 | 64,332,089 | 23,211,126 | 12q14.2  | 15q11.2  |
| LU18_L  | 7  | 12 | 15 | 64,332,091 | 23,211,854 | 12q14.2  | 15q11.2  |
| LU18_L  | 8  | 12 | 12 | 64,332,182 | 68,674,338 | 12q14.2  | 12q15    |
| LU18_AD | 8  | 12 | 12 | 64,332,930 | 68,674,388 | 12q14.2  | 12q15    |
| LU3_AD  | 4  | 12 | 12 | 64,338,912 | 64,373,554 | 12q14.2  | 12q14.2  |
| LU3_AD  | 4  | 12 | 12 | 64,373,554 | 64,338,912 | 12q14.2  | 12q14.2  |
| LU7_L   | 3  | 12 | 12 | 64,467,026 | 69,486,676 | 12q14.2  | 12q15    |
| LU4_AD  | 5  | 5  | 5  | 64,468,413 | 37,782,454 | 5q12.3   | 5p13.2   |
| LU12_L  | 3  | 5  | 4  | 64,470,471 | 36,905,102 | 5q12.3   | 4p14     |

|         |    |    |    |            |             |          |          |
|---------|----|----|----|------------|-------------|----------|----------|
| LU20_AD | 4  | 5  | 5  | 64,473,535 | 37,780,614  | 5q12.3   | 5p13.2   |
| LU5_L   | 4  | 5  | 5  | 64,473,540 | 37,785,399  | 5q12.3   | 5p13.2   |
| LU20_AD | 4  | 5  | 16 | 64,481,974 | 46,390,711  | 5q12.3   | 16q11.2  |
| LU4_L   | 3  | 23 | 23 | 64,497,071 | 64,526,669  | Xq11.2   | Xq11.2   |
| LU14_AD | 8  | 15 | 14 | 64,502,086 | 94,958,110  | 15q22.31 | 14q32.13 |
| LU14_L  | 5  | 15 | 14 | 64,502,346 | 94,957,196  | 15q22.31 | 14q32.13 |
| LU7_L   | 7  | 12 | 12 | 64,506,625 | 49,736,022  | 12q14.2  | 12q13.12 |
| LU7_AD  | 7  | 12 | 12 | 64,507,788 | 49,734,221  | 12q14.2  | 12q13.12 |
| LU4_L   | 3  | 23 | 23 | 64,526,669 | 64,497,071  | Xq11.2   | Xq11.2   |
| LU4_L   | 3  | 16 | 16 | 64,529,049 | 46,887,821  | 16q21    | 16q11.2  |
| LU4_AD  | 6  | 16 | 16 | 64,549,760 | 46,533,444  | 16q21    | 16q11.2  |
| LU4_AD  | 5  | 3  | 3  | 64,580,869 | 64,612,752  | 3p14.1   | 3p14.1   |
| LU20_AD | 5  | 3  | 3  | 64,582,316 | 64,614,083  | 3p14.1   | 3p14.1   |
| LU18_L  | 30 | 12 | 12 | 64,600,052 | 64,331,032  | 12q14.2  | 12q14.2  |
| LU18_AD | 22 | 12 | 12 | 64,601,499 | 64,327,029  | 12q14.2  | 12q14.2  |
| LU8_AD  | 3  | 7  | 1  | 64,606,128 | 149,004,772 | 7q11.21  | 1q21.2   |
| LU16_AD | 7  | 3  | 3  | 64,609,171 | 64,758,335  | 3p14.1   | 3p14.1   |
| LU4_AD  | 5  | 3  | 3  | 64,612,752 | 64,580,869  | 3p14.1   | 3p14.1   |
| LU20_AD | 5  | 3  | 3  | 64,614,083 | 64,582,316  | 3p14.1   | 3p14.1   |
| LU4_AD  | 24 | 5  | 5  | 64,622,195 | 159,890,411 | 5q12.3   | 5q33.3   |
| LU18_AD | 3  | 12 | 5  | 64,627,753 | 20,629,242  | 12q14.2  | 5p14.3   |
| LU20_L  | 3  | 14 | 14 | 64,628,311 | 64,663,120  | 14q23.2  | 14q23.2  |
| LU16_AD | 15 | 12 | 12 | 64,641,684 | 81,527,118  | 12q14.2  | 12q21.31 |
| LU20_L  | 3  | 14 | 14 | 64,663,120 | 64,628,311  | 14q23.2  | 14q23.2  |
| LU4_AD  | 8  | 16 | 16 | 64,697,759 | 49,004,642  | 16q21    | 16q12.1  |
| LU4_L   | 5  | 16 | 16 | 64,698,082 | 49,004,951  | 16q21    | 16q12.1  |
| LU18_AD | 3  | 12 | 10 | 64,731,725 | 85,730,935  | 12q14.2  | 10q23.1  |
| LU18_AD | 4  | 6  | 5  | 64,737,719 | 96,650,465  | 6q12     | 5q15     |
| LU3_L   | 3  | 6  | 12 | 64,740,316 | 95,843,079  | 6q12     | 12q22    |
| LU16_AD | 7  | 3  | 3  | 64,758,335 | 64,609,171  | 3p14.1   | 3p14.1   |
| LU6_AD  | 7  | 8  | 8  | 64,767,197 | 64,045,180  | 8q12.3   | 8q12.3   |
| LU6_L   | 8  | 8  | 8  | 64,769,124 | 64,043,895  | 8q12.3   | 8q12.3   |
| LU3_AD  | 3  | 18 | 18 | 64,778,125 | 64,817,803  | 18q22.1  | 18q22.1  |
| LU7_L   | 4  | 12 | 12 | 64,797,180 | 60,426,195  | 12q14.2  | 12q14.1  |
| LU18_AD | 6  | 12 | 5  | 64,806,576 | 2,881,400   | 12q14.2  | 5p15.33  |
| LU18_L  | 15 | 12 | 5  | 64,806,729 | 2,881,087   | 12q14.2  | 5p15.33  |
| LU7_AD  | 4  | 12 | 12 | 64,815,732 | 62,224,953  | 12q14.2  | 12q14.1  |
| LU3_AD  | 3  | 18 | 18 | 64,817,803 | 64,778,125  | 18q22.1  | 18q22.1  |
| LU7_L   | 8  | 12 | 12 | 64,819,124 | 62,222,439  | 12q14.2  | 12q14.1  |
| LU14_AD | 5  | 15 | 19 | 64,825,801 | 57,535,903  | 15q22.31 | 19q13.43 |
| LU7_L   | 6  | 12 | 10 | 64,831,177 | 25,335,707  | 12q14.2  | 10p12.1  |
| LU7_AD  | 6  | 12 | 10 | 64,831,466 | 25,333,058  | 12q14.2  | 10p12.1  |
| LU12_AD | 4  | 6  | 11 | 64,855,939 | 132,528,893 | 6q12     | 11q25    |
| LU18_L  | 19 | 12 | 5  | 64,866,391 | 27,297,818  | 12q14.2  | 5p14.1   |

|         |    |    |    |            |             |          |          |
|---------|----|----|----|------------|-------------|----------|----------|
| LU18_AD | 20 | 12 | 5  | 64,867,070 | 27,296,016  | 12q14.2  | 5p14.1   |
| LU4_L   | 3  | 17 | 17 | 64,877,845 | 64,911,448  | 17q24.2  | 17q24.2  |
| LU16_AD | 5  | 18 | 18 | 64,887,075 | 59,220,973  | 18q22.1  | 18q21.33 |
| LU4_L   | 3  | 17 | 17 | 64,911,448 | 64,877,845  | 17q24.2  | 17q24.2  |
| LU18_AD | 6  | 12 | 5  | 64,934,060 | 27,212,730  | 12q14.2  | 5p14.1   |
| LU16_L  | 4  | 12 | 12 | 64,988,132 | 54,112,106  | 12q14.2  | 12q13.13 |
| LU7_L   | 7  | 12 | 7  | 65,092,105 | 4,756,431   | 12q14.2  | 7p22.1   |
| LU7_AD  | 6  | 12 | 7  | 65,092,345 | 4,756,196   | 12q14.2  | 7p22.1   |
| LU7_AD  | 3  | 12 | 12 | 65,100,761 | 55,572,973  | 12q14.3  | 12q13.2  |
| LU7_L   | 12 | 12 | 12 | 65,101,314 | 55,571,170  | 12q14.3  | 12q13.2  |
| LU3_L   | 6  | 2  | 3  | 65,111,009 | 894,344     | 2p14     | 3p26.3   |
| LU14_AD | 4  | 15 | 15 | 65,111,973 | 68,579,640  | 15q22.31 | 15q23    |
| LU7_L   | 4  | 12 | 12 | 65,151,388 | 65,359,974  | 12q14.3  | 12q14.3  |
| LU7_AD  | 6  | 12 | 12 | 65,151,942 | 65,358,796  | 12q14.3  | 12q14.3  |
| LU18_L  | 5  | 12 | 7  | 65,161,844 | 147,453,538 | 12q14.3  | 7q35     |
| LU7_AD  | 5  | 12 | 12 | 65,172,331 | 65,543,928  | 12q14.3  | 12q14.3  |
| LU18_AD | 5  | 12 | 4  | 65,181,915 | 66,667      | 12q14.3  | 4p16.3   |
| LU18_AD | 3  | 12 | 4  | 65,185,229 | 49,315,254  | 12q14.3  | 4p11     |
| LU7_L   | 28 | 12 | 12 | 65,191,110 | 66,645,562  | 12q14.3  | 12q14.3  |
| LU7_AD  | 11 | 12 | 12 | 65,192,090 | 66,644,688  | 12q14.3  | 12q14.3  |
| LU7_AD  | 7  | 12 | 12 | 65,231,667 | 60,255,754  | 12q14.3  | 12q14.1  |
| LU7_L   | 11 | 12 | 12 | 65,232,441 | 60,255,045  | 12q14.3  | 12q14.1  |
| LU4_L   | 4  | 16 | 16 | 65,235,633 | 65,566,207  | 16q21    | 16q21    |
| LU4_AD  | 11 | 16 | 16 | 65,274,020 | 60,344,786  | 16q21    | 16q21    |
| LU4_L   | 6  | 16 | 16 | 65,274,087 | 60,345,876  | 16q21    | 16q21    |
| LU18_AD | 8  | 12 | 12 | 65,278,216 | 71,274,272  | 12q14.3  | 12q15    |
| LU18_L  | 14 | 12 | 12 | 65,279,546 | 71,271,264  | 12q14.3  | 12q15    |
| LU4_L   | 10 | 16 | 16 | 65,298,557 | 69,510,406  | 16q21    | 16q22.1  |
| LU4_L   | 3  | 3  | 3  | 65,333,005 | 65,383,367  | 3p14.1   | 3p14.1   |
| LU7_AD  | 6  | 12 | 12 | 65,358,796 | 65,151,942  | 12q14.3  | 12q14.3  |
| LU7_L   | 4  | 12 | 12 | 65,359,974 | 65,151,388  | 12q14.3  | 12q14.3  |
| LU4_L   | 3  | 3  | 3  | 65,383,367 | 65,333,005  | 3p14.1   | 3p14.1   |
| LU4_AD  | 3  | 23 | 5  | 65,439,977 | 158,794,262 | Xq12     | 5q33.3   |
| LU7_L   | 7  | 12 | 12 | 65,454,342 | 61,213,228  | 12q14.3  | 12q14.1  |
| LU18_AD | 4  | 12 | 12 | 65,471,490 | 70,278,237  | 12q14.3  | 12q15    |
| LU18_L  | 6  | 12 | 12 | 65,472,119 | 70,277,459  | 12q14.3  | 12q15    |
| LU18_L  | 4  | 12 | 12 | 65,473,826 | 69,558,073  | 12q14.3  | 12q15    |
| LU18_AD | 4  | 12 | 12 | 65,475,116 | 69,557,942  | 12q14.3  | 12q15    |
| LU12_L  | 8  | 8  | 8  | 65,475,274 | 69,055,922  | 8q12.3   | 8q13.2   |
| LU7_L   | 6  | 12 | 12 | 65,537,075 | 56,331,989  | 12q14.3  | 12q13.2  |
| LU7_AD  | 7  | 12 | 12 | 65,537,110 | 56,330,916  | 12q14.3  | 12q13.2  |
| LU7_AD  | 5  | 12 | 12 | 65,543,928 | 65,172,331  | 12q14.3  | 12q14.3  |
| LU16_AD | 4  | 9  | 9  | 65,558,878 | 39,351,610  | 9q12     | 9p13.1   |
| LU4_L   | 4  | 16 | 16 | 65,566,207 | 65,235,633  | 16q21    | 16q21    |

|         |    |    |    |            |             |         |          |
|---------|----|----|----|------------|-------------|---------|----------|
| LU7_AD  | 5  | 12 | 7  | 65,651,718 | 37,217,449  | 12q14.3 | 7p14.1   |
| LU7_L   | 4  | 12 | 7  | 65,653,321 | 37,219,541  | 12q14.3 | 7p14.1   |
| LU3_L   | 3  | 6  | 6  | 65,660,275 | 65,690,739  | 6q12    | 6q12     |
| LU7_L   | 3  | 12 | 19 | 65,661,516 | 15,250,316  | 12q14.3 | 19p13.12 |
| LU7_L   | 6  | 12 | 12 | 65,668,265 | 66,311,506  | 12q14.3 | 12q14.3  |
| LU7_AD  | 4  | 12 | 12 | 65,668,604 | 66,312,957  | 12q14.3 | 12q14.3  |
| LU12_L  | 33 | 8  | 8  | 65,670,579 | 52,342,602  | 8q12.3  | 8q11.22  |
| LU18_AD | 61 | 12 | 12 | 65,678,337 | 69,308,099  | 12q14.3 | 12q15    |
| LU18_L  | 67 | 12 | 12 | 65,678,731 | 69,308,197  | 12q14.3 | 12q15    |
| LU3_L   | 3  | 6  | 6  | 65,690,739 | 65,660,275  | 6q12    | 6q12     |
| LU21_L  | 3  | 6  | 1  | 65,715,524 | 89,390,945  | 6q12    | 1p22.2   |
| LU15_L  | 5  | 6  | 12 | 65,718,904 | 59,245,306  | 6q12    | 12q14.1  |
| LU7_L   | 5  | 12 | 12 | 65,752,210 | 65,808,952  | 12q14.3 | 12q14.3  |
| LU18_AD | 21 | 12 | 12 | 65,755,725 | 67,165,787  | 12q14.3 | 12q14.3  |
| LU18_L  | 20 | 12 | 12 | 65,756,765 | 67,164,952  | 12q14.3 | 12q14.3  |
| LU18_AD | 24 | 12 | 5  | 65,768,507 | 1,134,039   | 12q14.3 | 5p15.33  |
| LU18_L  | 25 | 12 | 5  | 65,768,650 | 1,134,838   | 12q14.3 | 5p15.33  |
| LU12_L  | 12 | 8  | 8  | 65,781,082 | 36,250,754  | 8q12.3  | 8p12     |
| LU8_L   | 5  | 1  | 1  | 65,792,280 | 65,825,958  | 1p31.3  | 1p31.3   |
| LU7_L   | 5  | 12 | 12 | 65,808,952 | 65,752,210  | 12q14.3 | 12q14.3  |
| LU7_L   | 29 | 12 | 12 | 65,823,757 | 67,247,959  | 12q14.3 | 12q14.3  |
| LU7_AD  | 16 | 12 | 12 | 65,824,142 | 67,248,011  | 12q14.3 | 12q14.3  |
| LU8_L   | 5  | 1  | 1  | 65,825,958 | 65,792,280  | 1p31.3  | 1p31.3   |
| LU12_AD | 6  | 7  | 7  | 65,843,722 | 51,459,273  | 7q11.21 | 7p12.1   |
| LU20_L  | 4  | 7  | 1  | 65,845,125 | 222,651,200 | 7q11.21 | 1q41     |
| LU3_L   | 3  | 7  | 7  | 65,851,543 | 55,821,775  | 7q11.21 | 7p11.2   |
| LU18_AD | 4  | 12 | 12 | 65,852,531 | 65,910,718  | 12q14.3 | 12q14.3  |
| LU7_L   | 3  | 12 | 12 | 65,857,971 | 59,711,537  | 12q14.3 | 12q14.1  |
| LU20_AD | 3  | 9  | 9  | 65,869,783 | 40,218,976  | 9q12    | 9p13.1   |
| LU3_L   | 4  | 6  | 6  | 65,876,164 | 65,906,350  | 6q12    | 6q12     |
| LU16_L  | 3  | 9  | 7  | 65,885,039 | 42,120,362  | 9q12    | 7p14.1   |
| LU12_L  | 8  | 8  | 8  | 65,889,530 | 1,422,744   | 8q12.3  | 8p23.3   |
| LU3_L   | 4  | 6  | 6  | 65,906,350 | 65,876,164  | 6q12    | 6q12     |
| LU18_AD | 4  | 12 | 12 | 65,910,718 | 65,852,531  | 12q14.3 | 12q14.3  |
| LU14_L  | 3  | 9  | 9  | 65,968,946 | 46,903,495  | 9q13    | 9p11.2   |
| LU20_L  | 3  | 8  | 4  | 66,039,324 | 108,337,795 | 8q13.1  | 4q25     |
| LU11_AD | 4  | 8  | 23 | 66,043,918 | 148,957,987 | 8q13.1  | Xq28     |
| LU3_L   | 3  | 3  | 3  | 66,125,460 | 66,155,264  | 3p14.1  | 3p14.1   |
| LU6_AD  | 12 | 11 | 11 | 66,131,639 | 113,175,506 | 11q13.2 | 11q23.2  |
| LU6_L   | 8  | 11 | 11 | 66,133,937 | 113,175,638 | 11q13.2 | 11q23.2  |
| LU3_L   | 3  | 3  | 3  | 66,155,264 | 66,125,460  | 3p14.1  | 3p14.1   |
| LU6_L   | 39 | 11 | 11 | 66,177,930 | 122,360,077 | 11q13.2 | 11q24.1  |
| LU11_AD | 6  | 12 | 7  | 66,179,474 | 102,839,170 | 12q14.3 | 7q22.1   |
| LU11_AD | 36 | 12 | 12 | 66,179,539 | 63,977,781  | 12q14.3 | 12q14.2  |

|         |    |    |    |            |             |         |          |
|---------|----|----|----|------------|-------------|---------|----------|
| LU11_L  | 4  | 12 | 12 | 66,179,901 | 63,980,250  | 12q14.3 | 12q14.2  |
| LU11_AD | 12 | 12 | 7  | 66,180,578 | 35,145,693  | 12q14.3 | 7p14.2   |
| LU18_L  | 5  | 17 | 9  | 66,237,491 | 121,524,729 | 17q24.2 | 9q33.1   |
| LU16_L  | 3  | 17 | 18 | 66,256,707 | 60,759,029  | 17q24.2 | 18q21.33 |
| LU7_AD  | 7  | 12 | 7  | 66,299,816 | 34,372,186  | 12q14.3 | 7p14.3   |
| LU7_L   | 10 | 12 | 7  | 66,300,361 | 34,370,860  | 12q14.3 | 7p14.3   |
| LU7_L   | 6  | 12 | 12 | 66,311,506 | 65,668,265  | 12q14.3 | 12q14.3  |
| LU7_AD  | 4  | 12 | 12 | 66,312,957 | 65,668,604  | 12q14.3 | 12q14.3  |
| LU7_L   | 5  | 12 | 12 | 66,378,316 | 71,607,470  | 12q14.3 | 12q21.1  |
| LU11_AD | 14 | 12 | 18 | 66,424,547 | 27,075,148  | 12q14.3 | 18q12.1  |
| LU4_AD  | 8  | 16 | 1  | 66,438,484 | 150,849,258 | 16q21   | 1q21.3   |
| LU18_AD | 4  | 12 | 5  | 66,440,788 | 2,735,709   | 12q14.3 | 5p15.33  |
| LU18_AD | 5  | 12 | 12 | 66,467,546 | 66,499,184  | 12q14.3 | 12q14.3  |
| LU11_AD | 10 | 12 | 12 | 66,469,967 | 67,086,578  | 12q14.3 | 12q14.3  |
| LU18_AD | 5  | 12 | 12 | 66,499,184 | 66,467,546  | 12q14.3 | 12q14.3  |
| LU7_L   | 12 | 12 | 12 | 66,508,625 | 62,216,645  | 12q14.3 | 12q14.1  |
| LU18_AD | 5  | 12 | 12 | 66,516,376 | 70,587,162  | 12q14.3 | 12q15    |
| LU18_L  | 9  | 12 | 2  | 66,517,045 | 222,809,365 | 12q14.3 | 2q36.1   |
| LU18_L  | 3  | 12 | 12 | 66,534,112 | 66,566,354  | 12q14.3 | 12q14.3  |
| LU18_L  | 3  | 12 | 12 | 66,566,354 | 66,534,112  | 12q14.3 | 12q14.3  |
| LU6_L   | 11 | 11 | 1  | 66,574,476 | 103,365,317 | 11q13.2 | 1p21.1   |
| LU7_AD  | 21 | 12 | 12 | 66,602,763 | 62,666,079  | 12q14.3 | 12q14.1  |
| LU7_L   | 38 | 12 | 12 | 66,604,319 | 62,665,915  | 12q14.3 | 12q14.1  |
| LU6_L   | 29 | 11 | 1  | 66,635,658 | 102,178,705 | 11q13.2 | 1p21.2   |
| LU4_AD  | 12 | 5  | 5  | 66,642,016 | 53,176,676  | 5q12.3  | 5q11.2   |
| LU7_AD  | 11 | 12 | 12 | 66,644,688 | 65,192,090  | 12q14.3 | 12q14.3  |
| LU7_L   | 28 | 12 | 12 | 66,645,562 | 65,191,110  | 12q14.3 | 12q14.3  |
| LU7_AD  | 16 | 12 | 12 | 66,652,298 | 61,328,781  | 12q14.3 | 12q14.1  |
| LU7_L   | 38 | 12 | 12 | 66,652,821 | 61,329,111  | 12q14.3 | 12q14.1  |
| LU7_L   | 43 | 12 | 12 | 66,655,901 | 62,551,146  | 12q14.3 | 12q14.1  |
| LU7_AD  | 18 | 12 | 12 | 66,656,328 | 62,550,791  | 12q14.3 | 12q14.1  |
| LU3_AD  | 3  | 9  | 9  | 66,686,512 | 69,824,797  | 9q13    | 9q21.11  |
| LU4_AD  | 3  | 23 | 23 | 66,696,747 | 66,728,899  | Xq12    | Xq12     |
| LU4_AD  | 3  | 23 | 23 | 66,728,899 | 66,696,747  | Xq12    | Xq12     |
| LU18_AD | 3  | 4  | 9  | 66,744,542 | 26,186,677  | 4q13.2  | 9p21.2   |
| LU18_AD | 4  | 12 | 5  | 66,772,978 | 661,420     | 12q14.3 | 5p15.33  |
| LU18_L  | 4  | 12 | 5  | 66,773,619 | 661,114     | 12q14.3 | 5p15.33  |
| LU3_L   | 3  | 14 | 14 | 66,778,296 | 66,814,487  | 14q23.3 | 14q23.3  |
| LU3_L   | 3  | 8  | 23 | 66,778,997 | 68,919,653  | 8q13.1  | Xq13.1   |
| LU12_AD | 3  | 14 | 14 | 66,780,878 | 66,814,365  | 14q23.3 | 14q23.3  |
| LU12_AD | 3  | 14 | 14 | 66,814,365 | 66,780,878  | 14q23.3 | 14q23.3  |
| LU3_L   | 3  | 14 | 14 | 66,814,487 | 66,778,296  | 14q23.3 | 14q23.3  |
| LU20_AD | 3  | 1  | 16 | 66,886,447 | 21,644,939  | 1p31.3  | 16p12.2  |
| LU4_AD  | 5  | 14 | 14 | 66,889,531 | 66,919,435  | 14q23.3 | 14q23.3  |



|         |    |    |    |            |             |          |         |
|---------|----|----|----|------------|-------------|----------|---------|
| LU20_AD | 4  | 1  | 17 | 66,889,866 | 52,362,353  | 1p31.3   | 17q22   |
| LU20_AD | 6  | 10 | 10 | 66,906,349 | 66,938,501  | 10q21.3  | 10q21.3 |
| LU4_AD  | 5  | 14 | 14 | 66,919,435 | 66,889,531  | 14q23.3  | 14q23.3 |
| LU7_L   | 12 | 12 | 12 | 66,924,035 | 68,686,323  | 12q14.3  | 12q15   |
| LU7_AD  | 5  | 12 | 12 | 66,928,202 | 68,683,628  | 12q14.3  | 12q15   |
| LU20_L  | 5  | 23 | 23 | 66,931,008 | 66,962,670  | Xq12     | Xq12    |
| LU20_AD | 6  | 10 | 10 | 66,938,501 | 66,906,349  | 10q21.3  | 10q21.3 |
| LU7_L   | 25 | 12 | 12 | 66,948,267 | 61,561,066  | 12q14.3  | 12q14.1 |
| LU20_L  | 5  | 23 | 23 | 66,962,670 | 66,931,008  | Xq12     | Xq12    |
| LU18_AD | 11 | 12 | 5  | 67,017,662 | 4,990,573   | 12q14.3  | 5p15.32 |
| LU18_L  | 6  | 12 | 5  | 67,018,029 | 4,990,342   | 12q14.3  | 5p15.32 |
| LU18_L  | 50 | 12 | 5  | 67,035,186 | 2,525,335   | 12q14.3  | 5p15.33 |
| LU18_AD | 48 | 12 | 5  | 67,035,327 | 2,525,895   | 12q14.3  | 5p15.33 |
| LU18_AD | 44 | 12 | 12 | 67,035,776 | 69,304,105  | 12q14.3  | 12q15   |
| LU18_L  | 62 | 12 | 12 | 67,035,880 | 69,304,288  | 12q14.3  | 12q15   |
| LU7_L   | 6  | 12 | 7  | 67,037,722 | 23,466,646  | 12q14.3  | 7p15.3  |
| LU18_AD | 56 | 12 | 12 | 67,044,207 | 70,240,852  | 12q14.3  | 12q15   |
| LU18_L  | 47 | 12 | 12 | 67,044,237 | 70,241,679  | 12q14.3  | 12q15   |
| LU7_AD  | 4  | 12 | 12 | 67,045,330 | 68,204,333  | 12q14.3  | 12q15   |
| LU18_L  | 44 | 12 | 5  | 67,077,350 | 2,881,540   | 12q14.3  | 5p15.33 |
| LU18_AD | 56 | 12 | 5  | 67,079,638 | 2,879,340   | 12q14.3  | 5p15.33 |
| LU14_AD | 6  | 16 | 14 | 67,081,527 | 38,488,548  | 16q22.1  | 14q21.1 |
| LU11_AD | 10 | 12 | 12 | 67,086,578 | 66,469,967  | 12q14.3  | 12q14.3 |
| LU18_AD | 24 | 12 | 5  | 67,098,733 | 1,185,326   | 12q14.3  | 5p15.33 |
| LU18_L  | 20 | 12 | 5  | 67,098,890 | 1,186,424   | 12q14.3  | 5p15.33 |
| LU18_L  | 6  | 12 | 12 | 67,120,405 | 67,215,605  | 12q14.3  | 12q14.3 |
| LU18_AD | 60 | 12 | 12 | 67,120,541 | 67,215,193  | 12q14.3  | 12q14.3 |
| LU18_L  | 39 | 12 | 12 | 67,121,049 | 67,216,706  | 12q14.3  | 12q14.3 |
| LU18_AD | 26 | 12 | 5  | 67,129,761 | 1,632,929   | 12q14.3  | 5p15.33 |
| LU18_L  | 9  | 12 | 3  | 67,131,891 | 195,679,465 | 12q14.3  | 3q29    |
| LU18_L  | 16 | 12 | 5  | 67,132,476 | 1,632,163   | 12q14.3  | 5p15.33 |
| LU18_AD | 6  | 12 | 3  | 67,132,543 | 195,679,263 | 12q14.3  | 3q29    |
| LU4_AD  | 4  | 1  | 1  | 67,159,905 | 67,198,676  | 1p31.3   | 1p31.3  |
| LU18_L  | 20 | 12 | 12 | 67,164,952 | 65,756,765  | 12q14.3  | 12q14.3 |
| LU18_AD | 21 | 12 | 12 | 67,165,787 | 65,755,725  | 12q14.3  | 12q14.3 |
| LU4_AD  | 3  | 13 | 10 | 67,166,568 | 97,700,364  | 13q21.32 | 10q24.1 |
| LU6_AD  | 7  | 11 | 1  | 67,176,874 | 22,539,155  | 11q13.2  | 1p36.12 |
| LU12_L  | 3  | 6  | 7  | 67,190,135 | 81,832,786  | 6q12     | 7q21.11 |
| LU16_AD | 7  | 12 | 12 | 67,193,086 | 67,374,714  | 12q14.3  | 12q14.3 |
| LU4_AD  | 3  | 6  | 6  | 67,197,889 | 67,239,135  | 6q12     | 6q12    |
| LU4_AD  | 4  | 1  | 1  | 67,198,676 | 67,159,905  | 1p31.3   | 1p31.3  |
| LU18_AD | 60 | 12 | 12 | 67,215,193 | 67,120,541  | 12q14.3  | 12q14.3 |
| LU18_L  | 6  | 12 | 12 | 67,215,605 | 67,120,405  | 12q14.3  | 12q14.3 |
| LU18_L  | 39 | 12 | 12 | 67,216,706 | 67,121,049  | 12q14.3  | 12q14.3 |

|         |    |    |    |            |             |          |          |
|---------|----|----|----|------------|-------------|----------|----------|
| LU7_L   | 3  | 12 | 7  | 67,223,688 | 23,733,895  | 12q14.3  | 7p15.3   |
| LU4_AD  | 3  | 6  | 6  | 67,239,135 | 67,197,889  | 6q12     | 6q12     |
| LU14_L  | 3  | 23 | 23 | 67,247,947 | 67,278,381  | Xq12     | Xq12     |
| LU7_L   | 29 | 12 | 12 | 67,247,959 | 65,823,757  | 12q14.3  | 12q14.3  |
| LU7_AD  | 16 | 12 | 12 | 67,248,011 | 65,824,142  | 12q14.3  | 12q14.3  |
| LU11_AD | 12 | 12 | 12 | 67,257,705 | 43,024,796  | 12q14.3  | 12q12    |
| LU11_L  | 6  | 12 | 12 | 67,259,192 | 43,021,806  | 12q14.3  | 12q12    |
| LU3_L   | 3  | 15 | 1  | 67,265,436 | 42,411,118  | 15q22.32 | 1p34.2   |
| LU14_L  | 3  | 23 | 23 | 67,278,381 | 67,247,947  | Xq12     | Xq12     |
| LU15_L  | 6  | 3  | 3  | 67,279,246 | 54,170,502  | 3p14.1   | 3p21.1   |
| LU18_L  | 6  | 9  | 2  | 67,286,415 | 95,495,344  | 9q13     | 2q11.1   |
| LU18_AD | 4  | 9  | 9  | 67,286,639 | 43,106,644  | 9q13     | 9p12     |
| LU6_L   | 7  | 9  | 9  | 67,287,091 | 43,106,861  | 9q13     | 9p12     |
| LU6_L   | 4  | 9  | 2  | 67,287,661 | 95,495,439  | 9q13     | 2q11.1   |
| LU18_L  | 8  | 9  | 9  | 67,287,757 | 43,105,142  | 9q13     | 9p12     |
| LU8_L   | 9  | 9  | 9  | 67,287,758 | 43,105,858  | 9q13     | 9p12     |
| LU8_L   | 3  | 9  | 2  | 67,288,194 | 95,494,920  | 9q13     | 2q11.1   |
| LU5_AD  | 11 | 9  | 9  | 67,288,247 | 43,105,897  | 9q13     | 9p12     |
| LU5_L   | 7  | 9  | 9  | 67,288,375 | 43,105,104  | 9q13     | 9p12     |
| LU6_AD  | 3  | 9  | 9  | 67,288,917 | 43,105,159  | 9q13     | 9p12     |
| LU5_L   | 3  | 9  | 1  | 67,288,985 | 143,223,284 | 9q13     | 1q21.1   |
| LU7_L   | 6  | 12 | 21 | 67,293,668 | 35,385,655  | 12q14.3  | 21q22.11 |
| LU16_AD | 18 | 14 | 12 | 67,312,537 | 81,494,081  | 14q23.3  | 12q21.31 |
| LU5_L   | 3  | 9  | 9  | 67,328,729 | 42,775,952  | 9q13     | 9p12     |
| LU16_AD | 15 | 14 | 14 | 67,333,094 | 67,428,952  | 14q23.3  | 14q23.3  |
| LU12_L  | 4  | 9  | 16 | 67,350,394 | 32,658,355  | 9q13     | 16p11.2  |
| LU16_AD | 7  | 12 | 12 | 67,374,714 | 67,193,086  | 12q14.3  | 12q14.3  |
| LU7_L   | 3  | 11 | 7  | 67,384,857 | 144,119,856 | 11q13.2  | 7q35     |
| LU16_AD | 12 | 14 | 12 | 67,399,030 | 64,239,308  | 14q23.3  | 12q14.2  |
| LU4_L   | 3  | 6  | 6  | 67,414,372 | 67,444,426  | 6q12     | 6q12     |
| LU18_AD | 14 | 12 | 5  | 67,414,820 | 11,009,899  | 12q14.3  | 5p15.2   |
| LU16_AD | 15 | 14 | 14 | 67,428,952 | 67,333,094  | 14q23.3  | 14q23.3  |
| LU7_L   | 11 | 12 | 12 | 67,435,575 | 68,674,134  | 12q14.3  | 12q15    |
| LU7_AD  | 6  | 12 | 12 | 67,436,196 | 68,674,585  | 12q14.3  | 12q15    |
| LU4_L   | 3  | 6  | 6  | 67,444,426 | 67,414,372  | 6q12     | 6q12     |
| LU18_AD | 3  | 12 | 12 | 67,452,754 | 67,618,541  | 12q14.3  | 12q14.3  |
| LU18_AD | 7  | 12 | 12 | 67,464,087 | 70,259,007  | 12q14.3  | 12q15    |
| LU18_L  | 4  | 12 | 12 | 67,464,355 | 70,259,428  | 12q14.3  | 12q15    |
| LU11_AD | 14 | 12 | 12 | 67,478,791 | 111,284,239 | 12q14.3  | 12q24.11 |
| LU11_L  | 10 | 12 | 12 | 67,479,148 | 111,286,019 | 12q14.3  | 12q24.11 |
| LU18_L  | 4  | 12 | 12 | 67,486,972 | 71,790,052  | 12q14.3  | 12q21.1  |
| LU18_AD | 5  | 12 | 5  | 67,489,706 | 21,224,006  | 12q14.3  | 5p14.3   |
| LU18_L  | 5  | 12 | 5  | 67,489,784 | 21,223,708  | 12q14.3  | 5p14.3   |
| LU7_L   | 6  | 17 | 4  | 67,499,795 | 165,531,132 | 17q24.3  | 4q32.3   |

|         |    |    |    |            |             |          |          |
|---------|----|----|----|------------|-------------|----------|----------|
| LU11_L  | 8  | 12 | 8  | 67,509,957 | 58,876,183  | 12q14.3  | 8q12.1   |
| LU20_AD | 4  | 2  | 2  | 67,557,910 | 67,589,343  | 2p14     | 2p14     |
| LU18_AD | 40 | 12 | 5  | 67,571,123 | 633,095     | 12q14.3  | 5p15.33  |
| LU7_L   | 8  | 12 | 7  | 67,574,179 | 23,758,799  | 12q14.3  | 7p15.3   |
| LU20_AD | 4  | 2  | 2  | 67,589,343 | 67,557,910  | 2p14     | 2p14     |
| LU7_AD  | 8  | 12 | 12 | 67,603,725 | 59,865,956  | 12q14.3  | 12q14.1  |
| LU7_AD  | 3  | 11 | 4  | 67,608,174 | 9,647,158   | 11q13.2  | 4p16.1   |
| LU3_AD  | 3  | 11 | 2  | 67,614,481 | 232,271,203 | 11q13.2  | 2q37.1   |
| LU18_AD | 3  | 12 | 12 | 67,618,541 | 67,452,754  | 12q14.3  | 12q14.3  |
| LU4_L   | 3  | 15 | 15 | 67,627,164 | 67,662,181  | 15q23    | 15q23    |
| LU18_L  | 15 | 12 | 12 | 67,655,328 | 58,090,821  | 12q14.3  | 12q13.3  |
| LU18_AD | 10 | 12 | 12 | 67,655,463 | 58,088,954  | 12q14.3  | 12q13.3  |
| LU4_L   | 3  | 15 | 15 | 67,662,181 | 67,627,164  | 15q23    | 15q23    |
| LU18_AD | 70 | 12 | 5  | 67,715,757 | 1,132,839   | 12q15    | 5p15.33  |
| LU18_L  | 79 | 12 | 5  | 67,716,629 | 1,132,896   | 12q15    | 5p15.33  |
| LU18_L  | 31 | 12 | 12 | 67,723,954 | 71,215,357  | 12q15    | 12q15    |
| LU18_AD | 38 | 12 | 12 | 67,727,096 | 71,209,582  | 12q15    | 12q15    |
| LU7_AD  | 3  | 9  | 9  | 67,741,933 | 46,163,463  | 9q13     | 9p11.2   |
| LU14_AD | 3  | 12 | 12 | 67,754,608 | 67,785,187  | 12q15    | 12q15    |
| LU14_AD | 3  | 12 | 12 | 67,785,187 | 67,754,608  | 12q15    | 12q15    |
| LU4_L   | 5  | 9  | 4  | 67,790,063 | 190,679,350 | 9q13     | 4q35.2   |
| LU18_AD | 74 | 12 | 5  | 67,795,485 | 2,057,753   | 12q15    | 5p15.33  |
| LU18_L  | 67 | 12 | 5  | 67,796,636 | 2,058,241   | 12q15    | 5p15.33  |
| LU18_AD | 20 | 12 | 5  | 67,803,224 | 891,047     | 12q15    | 5p15.33  |
| LU18_L  | 15 | 12 | 5  | 67,803,303 | 891,237     | 12q15    | 5p15.33  |
| LU18_L  | 6  | 12 | 5  | 67,824,430 | 689,580     | 12q15    | 5p15.33  |
| LU18_AD | 5  | 12 | 5  | 67,825,530 | 690,448     | 12q15    | 5p15.33  |
| LU7_L   | 6  | 12 | 12 | 67,840,585 | 58,671,917  | 12q15    | 12q14.1  |
| LU3_L   | 5  | 5  | 5  | 67,860,903 | 67,910,346  | 5q13.1   | 5q13.1   |
| LU16_L  | 5  | 23 | 5  | 67,872,846 | 149,032,463 | Xq13.1   | 5q32     |
| LU3_L   | 5  | 5  | 5  | 67,910,346 | 67,860,903  | 5q13.1   | 5q13.1   |
| LU20_L  | 3  | 9  | 24 | 67,926,726 | 13,324,091  | 9q13     | Yq11.1   |
| LU7_L   | 7  | 12 | 12 | 67,934,265 | 52,554,463  | 12q15    | 12q13.13 |
| LU7_L   | 35 | 12 | 12 | 67,957,086 | 62,744,859  | 12q15    | 12q14.1  |
| LU7_L   | 4  | 12 | 12 | 67,961,901 | 49,853,001  | 12q15    | 12q13.12 |
| LU7_AD  | 23 | 12 | 12 | 67,966,155 | 62,740,699  | 12q15    | 12q14.1  |
| LU5_L   | 4  | 13 | 19 | 67,971,960 | 20,700,340  | 13q21.32 | 19p12    |
| LU11_AD | 6  | 12 | 12 | 67,983,494 | 50,589,424  | 12q15    | 12q13.12 |
| LU7_L   | 6  | 12 | 15 | 68,030,252 | 33,538,457  | 12q15    | 15q13.3  |
| LU7_L   | 4  | 12 | 12 | 68,053,873 | 72,114,434  | 12q15    | 12q21.1  |
| LU11_L  | 6  | 12 | 20 | 68,097,323 | 17,434,826  | 12q15    | 20p12.1  |
| LU16_L  | 5  | 1  | 1  | 68,108,978 | 101,805,994 | 1p31.3   | 1p21.2   |
| LU16_L  | 4  | 1  | 1  | 68,109,403 | 106,770,336 | 1p31.3   | 1p21.1   |
| LU16_AD | 9  | 1  | 1  | 68,109,519 | 106,770,739 | 1p31.3   | 1p21.1   |

|         |    |    |    |            |             |          |          |
|---------|----|----|----|------------|-------------|----------|----------|
| LU16_AD | 8  | 1  | 1  | 68,109,665 | 101,804,619 | 1p31.3   | 1p21.2   |
| LU7_AD  | 13 | 12 | 12 | 68,128,679 | 53,154,930  | 12q15    | 12q13.13 |
| LU16_L  | 4  | 6  | 1  | 68,129,570 | 106,773,768 | 6q12     | 1p21.1   |
| LU7_L   | 22 | 12 | 12 | 68,131,502 | 53,152,732  | 12q15    | 12q13.13 |
| LU11_L  | 7  | 12 | 4  | 68,132,925 | 73,433,765  | 12q15    | 4q13.3   |
| LU4_AD  | 3  | 3  | 3  | 68,135,870 | 68,173,648  | 3p14.1   | 3p14.1   |
| LU7_AD  | 7  | 12 | 12 | 68,137,906 | 50,289,075  | 12q15    | 12q13.12 |
| LU7_L   | 19 | 12 | 12 | 68,138,540 | 50,288,851  | 12q15    | 12q13.12 |
| LU18_L  | 4  | 4  | 4  | 68,149,639 | 69,128,251  | 4q13.2   | 4q13.2   |
| LU21_AD | 3  | 4  | 4  | 68,150,866 | 69,127,127  | 4q13.2   | 4q13.2   |
| LU7_L   | 3  | 12 | 8  | 68,159,149 | 114,523,876 | 12q15    | 8q23.3   |
| LU18_L  | 3  | 12 | 3  | 68,162,799 | 148,136,958 | 12q15    | 3q24     |
| LU18_L  | 4  | 12 | 5  | 68,164,343 | 18,541,650  | 12q15    | 5p14.3   |
| LU18_L  | 3  | 12 | 2  | 68,166,171 | 5,141,404   | 12q15    | 2p25.2   |
| LU18_L  | 4  | 12 | 2  | 68,166,636 | 216,787,228 | 12q15    | 2q35     |
| LU18_L  | 3  | 12 | 13 | 68,168,031 | 48,631,394  | 12q15    | 13q14.2  |
| LU4_AD  | 3  | 3  | 3  | 68,173,648 | 68,135,870  | 3p14.1   | 3p14.1   |
| LU7_AD  | 4  | 12 | 12 | 68,204,333 | 67,045,330  | 12q15    | 12q14.3  |
| LU4_L   | 3  | 16 | 1  | 68,230,653 | 22,856,393  | 16q22.1  | 1p36.12  |
| LU5_AD  | 8  | 6  | 6  | 68,234,461 | 73,846,208  | 6q12     | 6q13     |
| LU5_L   | 3  | 6  | 6  | 68,236,475 | 73,846,679  | 6q12     | 6q13     |
| LU7_AD  | 3  | 12 | 12 | 68,251,225 | 68,284,616  | 12q15    | 12q15    |
| LU11_L  | 7  | 12 | 12 | 68,268,416 | 115,299,675 | 12q15    | 12q24.21 |
| LU18_L  | 4  | 8  | 16 | 68,270,440 | 81,373,846  | 8q13.2   | 16q23.2  |
| LU7_L   | 9  | 12 | 7  | 68,272,077 | 8,086,508   | 12q15    | 7p21.3   |
| LU7_AD  | 6  | 12 | 7  | 68,273,056 | 8,085,885   | 12q15    | 7p21.3   |
| LU7_AD  | 8  | 12 | 7  | 68,275,994 | 2,585,586   | 12q15    | 7p22.3   |
| LU7_L   | 14 | 12 | 7  | 68,276,387 | 2,585,968   | 12q15    | 7p22.3   |
| LU11_L  | 20 | 12 | 12 | 68,279,001 | 69,187,674  | 12q15    | 12q15    |
| LU7_AD  | 3  | 12 | 12 | 68,284,616 | 68,251,225  | 12q15    | 12q15    |
| LU6_L   | 68 | 11 | 11 | 68,318,699 | 125,969,979 | 11q13.2  | 11q24.2  |
| LU11_L  | 14 | 12 | 12 | 68,369,882 | 49,675,875  | 12q15    | 12q13.12 |
| LU11_L  | 29 | 12 | 12 | 68,370,125 | 48,523,556  | 12q15    | 12q13.11 |
| LU11_AD | 53 | 12 | 12 | 68,370,243 | 48,520,189  | 12q15    | 12q13.11 |
| LU11_AD | 21 | 12 | 12 | 68,370,816 | 49,676,016  | 12q15    | 12q13.12 |
| LU11_AD | 3  | 11 | 6  | 68,395,816 | 40,833,255  | 11q13.2  | 6p21.1   |
| LU18_AD | 17 | 12 | 5  | 68,442,186 | 615,924     | 12q15    | 5p15.33  |
| LU18_L  | 26 | 12 | 5  | 68,443,146 | 616,074     | 12q15    | 5p15.33  |
| LU7_AD  | 5  | 12 | 15 | 68,449,114 | 37,181,377  | 12q15    | 15q14    |
| LU7_L   | 8  | 12 | 12 | 68,456,708 | 61,971,508  | 12q15    | 12q14.1  |
| LU18_L  | 3  | 13 | 3  | 68,479,596 | 125,428,159 | 13q21.32 | 3q21.2   |
| LU18_L  | 3  | 13 | 8  | 68,480,528 | 11,782,530  | 13q21.32 | 8p23.1   |
| LU20_AD | 4  | 13 | 12 | 68,488,771 | 52,502,265  | 13q21.32 | 12q13.13 |
| LU3_L   | 4  | 18 | 18 | 68,527,292 | 68,562,625  | 18q22.2  | 18q22.2  |

|         |    |    |    |            |             |         |          |
|---------|----|----|----|------------|-------------|---------|----------|
| LU7_L   | 35 | 12 | 12 | 68,550,976 | 59,648,892  | 12q15   | 12q14.1  |
| LU7_AD  | 12 | 12 | 12 | 68,551,187 | 59,650,305  | 12q15   | 12q14.1  |
| LU3_L   | 4  | 18 | 18 | 68,562,625 | 68,527,292  | 18q22.2 | 18q22.2  |
| LU18_AD | 3  | 12 | 12 | 68,564,619 | 71,801,580  | 12q15   | 12q21.1  |
| LU18_AD | 5  | 12 | 15 | 68,565,447 | 21,905,148  | 12q15   | 15q11.2  |
| LU18_L  | 6  | 12 | 12 | 68,568,820 | 69,646,059  | 12q15   | 12q15    |
| LU18_AD | 8  | 12 | 12 | 68,571,305 | 69,644,624  | 12q15   | 12q15    |
| LU21_AD | 3  | 4  | 4  | 68,576,369 | 68,606,512  | 4q13.2  | 4q13.2   |
| LU14_AD | 4  | 15 | 15 | 68,579,640 | 65,111,973  | 15q23   | 15q22.31 |
| LU14_L  | 6  | 15 | 5  | 68,580,056 | 2,482,154   | 15q23   | 5p15.33  |
| LU14_AD | 11 | 15 | 5  | 68,580,449 | 2,481,699   | 15q23   | 5p15.33  |
| LU7_L   | 5  | 12 | 7  | 68,586,903 | 26,470,502  | 12q15   | 7p15.2   |
| LU3_AD  | 3  | 12 | 12 | 68,587,829 | 40,333,825  | 12q15   | 12q12    |
| LU4_L   | 3  | 14 | 14 | 68,588,807 | 68,622,391  | 14q24.1 | 14q24.1  |
| LU21_AD | 3  | 4  | 4  | 68,606,512 | 68,576,369  | 4q13.2  | 4q13.2   |
| LU18_AD | 7  | 12 | 12 | 68,608,984 | 68,857,366  | 12q15   | 12q15    |
| LU18_L  | 5  | 12 | 12 | 68,610,266 | 68,857,583  | 12q15   | 12q15    |
| LU4_L   | 3  | 14 | 14 | 68,622,391 | 68,588,807  | 14q24.1 | 14q24.1  |
| LU7_L   | 7  | 12 | 10 | 68,647,011 | 33,017,277  | 12q15   | 10p11.22 |
| LU7_AD  | 4  | 12 | 10 | 68,647,257 | 33,015,910  | 12q15   | 10p11.22 |
| LU7_AD  | 6  | 12 | 12 | 68,648,664 | 54,090,292  | 12q15   | 12q13.13 |
| LU16_AD | 3  | 9  | 9  | 68,672,447 | 45,634,869  | 9q13    | 9p11.2   |
| LU7_L   | 11 | 12 | 12 | 68,674,134 | 67,435,575  | 12q15   | 12q14.3  |
| LU18_L  | 8  | 12 | 12 | 68,674,338 | 64,332,182  | 12q15   | 12q14.2  |
| LU18_AD | 8  | 12 | 12 | 68,674,388 | 64,332,930  | 12q15   | 12q14.2  |
| LU7_AD  | 6  | 12 | 12 | 68,674,585 | 67,436,196  | 12q15   | 12q14.3  |
| LU7_AD  | 5  | 12 | 12 | 68,683,628 | 66,928,202  | 12q15   | 12q14.3  |
| LU7_L   | 12 | 12 | 12 | 68,686,323 | 66,924,035  | 12q15   | 12q14.3  |
| LU14_AD | 4  | 8  | 6  | 68,784,909 | 159,682,906 | 8q13.2  | 6q25.3   |
| LU14_L  | 3  | 14 | 14 | 68,805,539 | 68,838,847  | 14q24.1 | 14q24.1  |
| LU16_AD | 7  | 9  | 7  | 68,810,722 | 34,385,475  | 9q21.11 | 7p14.3   |
| LU7_AD  | 4  | 12 | 7  | 68,814,932 | 21,835,395  | 12q15   | 7p15.3   |
| LU7_L   | 5  | 12 | 7  | 68,815,337 | 21,836,076  | 12q15   | 7p15.3   |
| LU7_AD  | 7  | 12 | 12 | 68,824,157 | 68,985,196  | 12q15   | 12q15    |
| LU7_L   | 7  | 12 | 12 | 68,824,603 | 68,984,562  | 12q15   | 12q15    |
| LU7_L   | 17 | 12 | 12 | 68,832,801 | 61,207,721  | 12q15   | 12q14.1  |
| LU7_AD  | 11 | 12 | 12 | 68,832,863 | 61,207,682  | 12q15   | 12q14.1  |
| LU11_AD | 10 | 12 | 12 | 68,833,957 | 56,654,654  | 12q15   | 12q13.3  |
| LU18_L  | 15 | 12 | 5  | 68,834,858 | 566,401     | 12q15   | 5p15.33  |
| LU18_AD | 13 | 12 | 5  | 68,834,970 | 566,584     | 12q15   | 5p15.33  |
| LU11_L  | 9  | 12 | 12 | 68,838,130 | 48,709,850  | 12q15   | 12q13.11 |
| LU11_AD | 12 | 12 | 18 | 68,838,292 | 35,823,309  | 12q15   | 18q12.2  |
| LU14_L  | 3  | 14 | 14 | 68,838,847 | 68,805,539  | 14q24.1 | 14q24.1  |
| LU11_L  | 6  | 12 | 18 | 68,839,118 | 35,821,721  | 12q15   | 18q12.2  |

|         |     |    |    |            |             |         |          |
|---------|-----|----|----|------------|-------------|---------|----------|
| LU11_AD | 4   | 12 | 12 | 68,839,632 | 48,709,983  | 12q15   | 12q13.11 |
| LU18_AD | 7   | 12 | 12 | 68,857,366 | 68,608,984  | 12q15   | 12q15    |
| LU18_L  | 5   | 12 | 12 | 68,857,583 | 68,610,266  | 12q15   | 12q15    |
| LU18_L  | 8   | 12 | 25 | 68,862,290 | 635,563     | 12q15   | 25       |
| LU18_L  | 3   | 12 | 1  | 68,862,921 | 143,279,005 | 12q15   | 1q21.1   |
| LU3_L   | 3   | 23 | 8  | 68,919,653 | 66,778,997  | Xq13.1  | 8q13.1   |
| LU20_AD | 3   | 5  | 20 | 68,927,919 | 23,969,090  | 5q13.2  | 20p11.21 |
| LU18_AD | 4   | 12 | 1  | 68,933,000 | 248,067,887 | 12q15   | 1q44     |
| LU18_AD | 4   | 12 | 1  | 68,933,202 | 227,870,054 | 12q15   | 1q42.13  |
| LU7_L   | 4   | 12 | 1  | 68,934,022 | 248,061,847 | 12q15   | 1q44     |
| LU18_AD | 3   | 12 | 23 | 68,934,875 | 48,712,580  | 12q15   | Xp11.23  |
| LU18_AD | 5   | 12 | 4  | 68,934,882 | 104,145,598 | 12q15   | 4q24     |
| LU18_L  | 7   | 12 | 12 | 68,937,811 | 21,093,460  | 12q15   | 12p12.2  |
| LU18_L  | 3   | 12 | 1  | 68,938,175 | 206,286,638 | 12q15   | 1q32.1   |
| LU18_L  | 15  | 12 | 11 | 68,938,258 | 59,871,820  | 12q15   | 11q12.1  |
| LU3_L   | 5   | 12 | 23 | 68,938,832 | 115,035,656 | 12q15   | Xq23     |
| LU18_AD | 13  | 12 | 11 | 68,939,437 | 59,870,902  | 12q15   | 11q12.1  |
| LU18_AD | 8   | 12 | 12 | 68,939,485 | 21,091,886  | 12q15   | 12p12.2  |
| LU18_L  | 16  | 12 | 3  | 68,939,895 | 161,763,613 | 12q15   | 3q26.1   |
| LU18_AD | 5   | 12 | 23 | 68,940,021 | 115,033,933 | 12q15   | Xq23     |
| LU12_L  | 6   | 12 | 23 | 68,941,175 | 115,033,923 | 12q15   | Xq23     |
| LU7_AD  | 3   | 12 | 3  | 68,944,686 | 87,783,462  | 12q15   | 3p11.2   |
| LU18_L  | 4   | 12 | 3  | 68,946,972 | 39,452,316  | 12q15   | 3p22.1   |
| LU8_L   | 4   | 6  | 15 | 68,970,109 | 61,413,603  | 6q12    | 15q22.2  |
| LU7_L   | 12  | 12 | 12 | 68,982,333 | 61,796,587  | 12q15   | 12q14.1  |
| LU7_L   | 7   | 12 | 12 | 68,984,562 | 68,824,603  | 12q15   | 12q15    |
| LU7_AD  | 7   | 12 | 12 | 68,985,196 | 68,824,157  | 12q15   | 12q15    |
| LU8_L   | 4   | 6  | 15 | 68,992,805 | 61,441,840  | 6q12    | 15q22.2  |
| LU11_AD | 3   | 5  | 5  | 69,047,291 | 69,923,060  | 5q13.2  | 5q13.2   |
| LU4_L   | 4   | 5  | 5  | 69,048,560 | 69,924,106  | 5q13.2  | 5q13.2   |
| LU18_L  | 3   | 12 | 6  | 69,050,387 | 117,753,060 | 12q15   | 6q22.1   |
| LU12_L  | 8   | 8  | 8  | 69,055,922 | 65,475,274  | 8q13.2  | 8q12.3   |
| LU7_AD  | 20  | 12 | 12 | 69,070,485 | 62,238,173  | 12q15   | 12q14.1  |
| LU7_L   | 36  | 12 | 12 | 69,070,535 | 62,238,172  | 12q15   | 12q14.1  |
| LU7_L   | 6   | 12 | 12 | 69,079,054 | 61,677,639  | 12q15   | 12q14.1  |
| LU6_L   | 9   | 12 | 14 | 69,079,182 | 50,557,306  | 12q15   | 14q21.3  |
| LU18_L  | 104 | 12 | 5  | 69,080,467 | 2,922,988   | 12q15   | 5p15.33  |
| LU18_AD | 92  | 12 | 5  | 69,080,472 | 2,923,426   | 12q15   | 5p15.33  |
| LU4_AD  | 3   | 5  | 5  | 69,084,149 | 69,456,380  | 5q13.2  | 5q13.2   |
| LU18_L  | 4   | 12 | 7  | 69,089,192 | 146,789,281 | 12q15   | 7q35     |
| LU18_AD | 5   | 12 | 7  | 69,089,240 | 146,789,613 | 12q15   | 7q35     |
| LU4_AD  | 3   | 10 | 10 | 69,122,685 | 69,165,566  | 10q21.3 | 10q21.3  |
| LU21_AD | 3   | 4  | 4  | 69,127,127 | 68,150,866  | 4q13.2  | 4q13.2   |
| LU18_L  | 4   | 4  | 4  | 69,128,251 | 68,149,639  | 4q13.2  | 4q13.2   |

|         |    |    |    |            |             |         |          |
|---------|----|----|----|------------|-------------|---------|----------|
| LU3_L   | 4  | 7  | 7  | 69,136,326 | 69,169,620  | 7q11.22 | 7q11.22  |
| LU16_AD | 6  | 9  | 7  | 69,146,868 | 34,386,000  | 9q21.11 | 7p14.3   |
| LU4_AD  | 3  | 10 | 10 | 69,165,566 | 69,122,685  | 10q21.3 | 10q21.3  |
| LU3_L   | 4  | 7  | 7  | 69,169,620 | 69,136,326  | 7q11.22 | 7q11.22  |
| LU18_L  | 5  | 12 | 5  | 69,175,757 | 1,447,881   | 12q15   | 5p15.33  |
| LU11_L  | 11 | 12 | 12 | 69,187,038 | 59,207,505  | 12q15   | 12q14.1  |
| LU11_L  | 20 | 12 | 12 | 69,187,674 | 68,279,001  | 12q15   | 12q15    |
| LU20_AD | 3  | 9  | 5  | 69,188,715 | 135,110,612 | 9q21.11 | 5q31.1   |
| LU20_AD | 3  | 9  | 19 | 69,191,285 | 41,971,186  | 9q21.11 | 19q13.2  |
| LU18_AD | 12 | 12 | 12 | 69,216,418 | 69,247,584  | 12q15   | 12q15    |
| LU5_AD  | 3  | 14 | 14 | 69,237,867 | 69,282,529  | 14q24.1 | 14q24.1  |
| LU18_AD | 12 | 12 | 12 | 69,247,584 | 69,216,418  | 12q15   | 12q15    |
| LU18_L  | 3  | 12 | 12 | 69,265,297 | 69,680,308  | 12q15   | 12q15    |
| LU11_L  | 4  | 12 | 12 | 69,278,255 | 48,818,163  | 12q15   | 12q13.11 |
| LU5_AD  | 3  | 14 | 14 | 69,282,529 | 69,237,867  | 14q24.1 | 14q24.1  |
| LU18_AD | 44 | 12 | 12 | 69,304,105 | 67,035,776  | 12q15   | 12q14.3  |
| LU18_L  | 62 | 12 | 12 | 69,304,288 | 67,035,880  | 12q15   | 12q14.3  |
| LU18_AD | 26 | 12 | 5  | 69,306,554 | 2,520,786   | 12q15   | 5p15.33  |
| LU18_L  | 44 | 12 | 5  | 69,307,567 | 2,524,107   | 12q15   | 5p15.33  |
| LU18_AD | 61 | 12 | 12 | 69,308,099 | 65,678,337  | 12q15   | 12q14.3  |
| LU18_L  | 67 | 12 | 12 | 69,308,197 | 65,678,731  | 12q15   | 12q14.3  |
| LU18_AD | 32 | 12 | 5  | 69,311,333 | 2,603,682   | 12q15   | 5p15.33  |
| LU18_L  | 34 | 12 | 5  | 69,312,446 | 2,603,674   | 12q15   | 5p15.33  |
| LU18_L  | 11 | 12 | 5  | 69,332,949 | 1,121,349   | 12q15   | 5p15.33  |
| LU18_AD | 7  | 12 | 12 | 69,333,941 | 70,235,258  | 12q15   | 12q15    |
| LU18_L  | 5  | 12 | 12 | 69,336,595 | 70,235,660  | 12q15   | 12q15    |
| LU18_L  | 4  | 12 | 7  | 69,378,422 | 125,097,073 | 12q15   | 7q31.33  |
| LU7_L   | 4  | 12 | 7  | 69,378,928 | 25,815,440  | 12q15   | 7p15.2   |
| LU4_AD  | 4  | 5  | 5  | 69,387,308 | 70,363,838  | 5q13.2  | 5q13.2   |
| LU4_AD  | 7  | 16 | 16 | 69,405,008 | 48,685,620  | 16q22.1 | 16q12.1  |
| LU4_L   | 4  | 16 | 16 | 69,405,863 | 48,683,029  | 16q22.1 | 16q12.1  |
| LU11_AD | 6  | 12 | 12 | 69,427,220 | 63,874,145  | 12q15   | 12q14.2  |
| LU11_L  | 5  | 12 | 12 | 69,428,257 | 63,874,075  | 12q15   | 12q14.2  |
| LU8_L   | 4  | 4  | 4  | 69,439,668 | 69,921,730  | 4q13.2  | 4q13.2   |
| LU21_AD | 3  | 10 | 20 | 69,446,550 | 23,791,291  | 10q21.3 | 20p11.21 |
| LU4_AD  | 3  | 5  | 5  | 69,456,380 | 69,084,149  | 5q13.2  | 5q13.2   |
| LU4_L   | 5  | 16 | 16 | 69,458,531 | 48,681,325  | 16q22.1 | 16q12.1  |
| LU4_AD  | 12 | 16 | 16 | 69,460,661 | 48,679,178  | 16q22.1 | 16q12.1  |
| LU11_L  | 19 | 12 | 12 | 69,477,169 | 61,950,290  | 12q15   | 12q14.1  |
| LU11_AD | 24 | 12 | 12 | 69,477,514 | 61,949,808  | 12q15   | 12q14.1  |
| LU18_AD | 44 | 12 | 5  | 69,481,147 | 1,149,936   | 12q15   | 5p15.33  |
| LU18_L  | 46 | 12 | 5  | 69,483,640 | 1,149,256   | 12q15   | 5p15.33  |
| LU7_L   | 3  | 12 | 12 | 69,486,676 | 64,467,026  | 12q15   | 12q14.2  |
| LU7_AD  | 4  | 12 | 10 | 69,489,333 | 33,071,432  | 12q15   | 10p11.22 |

|         |    |    |    |            |             |         |          |
|---------|----|----|----|------------|-------------|---------|----------|
| LU18_AD | 3  | 12 | 5  | 69,490,926 | 649,322     | 12q15   | 5p15.33  |
| LU18_L  | 6  | 12 | 5  | 69,491,295 | 648,405     | 12q15   | 5p15.33  |
| LU18_AD | 4  | 12 | 12 | 69,496,637 | 70,717,852  | 12q15   | 12q15    |
| LU18_L  | 9  | 12 | 12 | 69,496,731 | 70,717,573  | 12q15   | 12q15    |
| LU18_AD | 3  | 12 | 5  | 69,501,341 | 612,987     | 12q15   | 5p15.33  |
| LU4_L   | 10 | 16 | 16 | 69,510,406 | 65,298,557  | 16q22.1 | 16q21    |
| LU18_AD | 23 | 12 | 5  | 69,513,985 | 536,886     | 12q15   | 5p15.33  |
| LU18_L  | 22 | 12 | 5  | 69,514,020 | 537,600     | 12q15   | 5p15.33  |
| LU7_AD  | 4  | 12 | 7  | 69,516,627 | 35,651,175  | 12q15   | 7p14.2   |
| LU18_L  | 11 | 12 | 12 | 69,531,500 | 70,131,854  | 12q15   | 12q15    |
| LU18_AD | 9  | 12 | 12 | 69,532,460 | 63,838,247  | 12q15   | 12q14.2  |
| LU18_L  | 12 | 12 | 5  | 69,532,842 | 546,743     | 12q15   | 5p15.33  |
| LU18_AD | 4  | 12 | 12 | 69,557,942 | 65,475,116  | 12q15   | 12q14.3  |
| LU18_L  | 4  | 12 | 12 | 69,558,073 | 65,473,826  | 12q15   | 12q14.3  |
| LU7_L   | 3  | 12 | 12 | 69,587,323 | 51,215,124  | 12q15   | 12q13.12 |
| LU18_L  | 5  | 12 | 11 | 69,591,135 | 19,003,784  | 12q15   | 11p15.1  |
| LU18_L  | 3  | 12 | 15 | 69,596,779 | 62,503,884  | 12q15   | 15q22.2  |
| LU11_AD | 21 | 12 | 12 | 69,637,825 | 63,941,052  | 12q15   | 12q14.2  |
| LU11_L  | 11 | 12 | 12 | 69,641,045 | 63,938,054  | 12q15   | 12q14.2  |
| LU18_AD | 8  | 12 | 12 | 69,644,624 | 68,571,305  | 12q15   | 12q15    |
| LU18_L  | 6  | 12 | 12 | 69,646,059 | 68,568,820  | 12q15   | 12q15    |
| LU11_AD | 65 | 12 | 12 | 69,650,106 | 83,819,457  | 12q15   | 12q21.31 |
| LU18_AD | 6  | 12 | 12 | 69,675,482 | 69,889,104  | 12q15   | 12q15    |
| LU18_L  | 3  | 12 | 12 | 69,680,308 | 69,265,297  | 12q15   | 12q15    |
| LU18_AD | 4  | 12 | 12 | 69,714,648 | 69,758,190  | 12q15   | 12q15    |
| LU18_L  | 5  | 12 | 12 | 69,719,385 | 69,804,885  | 12q15   | 12q15    |
| LU18_AD | 11 | 12 | 12 | 69,728,219 | 70,124,578  | 12q15   | 12q15    |
| LU18_L  | 8  | 12 | 12 | 69,728,483 | 70,124,204  | 12q15   | 12q15    |
| LU4_L   | 19 | 16 | 1  | 69,736,454 | 2,036,448   | 16q22.1 | 1p36.33  |
| LU4_AD  | 27 | 16 | 1  | 69,737,043 | 2,035,656   | 16q22.1 | 1p36.33  |
| LU20_AD | 5  | 17 | 17 | 69,738,452 | 69,775,139  | 17q24.3 | 17q24.3  |
| LU11_L  | 5  | 12 | 12 | 69,743,342 | 83,853,840  | 12q15   | 12q21.31 |
| LU11_AD | 58 | 12 | 12 | 69,743,786 | 83,847,644  | 12q15   | 12q21.31 |
| LU11_L  | 4  | 7  | 12 | 69,746,843 | 107,093,360 | 7q11.22 | 12q23.3  |
| LU18_AD | 4  | 12 | 12 | 69,758,190 | 69,714,648  | 12q15   | 12q15    |
| LU20_AD | 5  | 17 | 17 | 69,775,139 | 69,738,452  | 17q24.3 | 17q24.3  |
| LU18_AD | 3  | 12 | 5  | 69,787,639 | 1,078,794   | 12q15   | 5p15.33  |
| LU18_L  | 5  | 12 | 12 | 69,804,885 | 69,719,385  | 12q15   | 12q15    |
| LU3_AD  | 3  | 9  | 9  | 69,824,797 | 66,686,512  | 9q21.11 | 9q13     |
| LU18_AD | 6  | 12 | 12 | 69,889,104 | 69,675,482  | 12q15   | 12q15    |
| LU18_AD | 17 | 12 | 5  | 69,892,598 | 2,814,435   | 12q15   | 5p15.33  |
| LU18_L  | 14 | 12 | 5  | 69,892,725 | 2,813,708   | 12q15   | 5p15.33  |
| LU8_L   | 4  | 4  | 4  | 69,921,730 | 69,439,668  | 4q13.2  | 4q13.2   |
| LU11_AD | 3  | 5  | 5  | 69,923,060 | 69,047,291  | 5q13.2  | 5q13.2   |



|         |     |    |    |            |            |         |          |
|---------|-----|----|----|------------|------------|---------|----------|
| LU4_L   | 4   | 5  | 5  | 69,924,106 | 69,048,560 | 5q13.2  | 5q13.2   |
| LU12_L  | 13  | 8  | 8  | 69,939,892 | 72,989,303 | 8q13.2  | 8q13.3   |
| LU4_L   | 4   | 5  | 5  | 69,973,373 | 21,296,491 | 5q13.2  | 5p14.3   |
| LU21_AD | 3   | 8  | 8  | 69,979,473 | 70,012,907 | 8q13.2  | 8q13.2   |
| LU18_L  | 23  | 12 | 5  | 69,984,073 | 768,539    | 12q15   | 5p15.33  |
| LU18_L  | 14  | 12 | 5  | 69,984,753 | 877,479    | 12q15   | 5p15.33  |
| LU18_AD | 15  | 12 | 5  | 69,985,077 | 767,603    | 12q15   | 5p15.33  |
| LU18_AD | 15  | 12 | 5  | 69,985,429 | 877,387    | 12q15   | 5p15.33  |
| LU21_AD | 3   | 8  | 8  | 70,012,907 | 69,979,473 | 8q13.2  | 8q13.2   |
| LU20_L  | 3   | 16 | 16 | 70,044,595 | 15,002,783 | 16q22.1 | 16p13.11 |
| LU8_L   | 3   | 16 | 16 | 70,045,083 | 15,007,620 | 16q22.1 | 16p13.11 |
| LU7_L   | 4   | 12 | 12 | 70,058,686 | 56,548,627 | 12q15   | 12q13.2  |
| LU7_AD  | 5   | 12 | 12 | 70,058,727 | 56,549,047 | 12q15   | 12q13.2  |
| LU7_AD  | 10  | 12 | 12 | 70,071,292 | 56,324,357 | 12q15   | 12q13.2  |
| LU7_L   | 6   | 12 | 12 | 70,071,547 | 56,326,569 | 12q15   | 12q13.2  |
| LU7_L   | 3   | 12 | 12 | 70,090,683 | 54,476,534 | 12q15   | 12q13.13 |
| LU18_AD | 74  | 12 | 5  | 70,111,687 | 1,156,048  | 12q15   | 5p15.33  |
| LU18_L  | 54  | 12 | 5  | 70,111,975 | 1,156,123  | 12q15   | 5p15.33  |
| LU18_AD | 11  | 12 | 12 | 70,116,062 | 70,262,610 | 12q15   | 12q15    |
| LU18_L  | 3   | 12 | 12 | 70,117,550 | 70,259,394 | 12q15   | 12q15    |
| LU18_L  | 11  | 12 | 12 | 70,117,779 | 70,260,655 | 12q15   | 12q15    |
| LU18_AD | 9   | 12 | 12 | 70,124,170 | 70,277,517 | 12q15   | 12q15    |
| LU18_L  | 8   | 12 | 12 | 70,124,204 | 69,728,483 | 12q15   | 12q15    |
| LU18_AD | 11  | 12 | 12 | 70,124,578 | 69,728,219 | 12q15   | 12q15    |
| LU18_L  | 4   | 12 | 12 | 70,124,766 | 70,277,657 | 12q15   | 12q15    |
| LU18_L  | 11  | 12 | 12 | 70,131,854 | 69,531,500 | 12q15   | 12q15    |
| LU3_L   | 3   | 12 | 12 | 70,152,307 | 70,183,915 | 12q15   | 12q15    |
| LU18_AD | 11  | 12 | 12 | 70,178,784 | 70,499,584 | 12q15   | 12q15    |
| LU3_L   | 3   | 12 | 12 | 70,183,915 | 70,152,307 | 12q15   | 12q15    |
| LU18_AD | 7   | 12 | 12 | 70,235,258 | 69,333,941 | 12q15   | 12q15    |
| LU18_L  | 5   | 12 | 12 | 70,235,660 | 69,336,595 | 12q15   | 12q15    |
| LU18_AD | 56  | 12 | 12 | 70,240,852 | 67,044,207 | 12q15   | 12q14.3  |
| LU18_L  | 47  | 12 | 12 | 70,241,679 | 67,044,237 | 12q15   | 12q14.3  |
| LU18_L  | 3   | 12 | 5  | 70,255,023 | 1,444,537  | 12q15   | 5p15.33  |
| LU18_AD | 7   | 12 | 12 | 70,259,007 | 67,464,087 | 12q15   | 12q14.3  |
| LU18_L  | 3   | 12 | 12 | 70,259,394 | 70,117,550 | 12q15   | 12q15    |
| LU18_L  | 4   | 12 | 12 | 70,259,428 | 67,464,355 | 12q15   | 12q14.3  |
| LU18_L  | 11  | 12 | 12 | 70,260,655 | 70,117,779 | 12q15   | 12q15    |
| LU18_AD | 11  | 12 | 12 | 70,262,610 | 70,116,062 | 12q15   | 12q15    |
| LU18_L  | 6   | 12 | 12 | 70,277,459 | 65,472,119 | 12q15   | 12q14.3  |
| LU18_AD | 9   | 12 | 12 | 70,277,517 | 70,124,170 | 12q15   | 12q15    |
| LU18_L  | 4   | 12 | 12 | 70,277,657 | 70,124,766 | 12q15   | 12q15    |
| LU18_L  | 150 | 12 | 12 | 70,277,781 | 71,812,228 | 12q15   | 12q21.1  |
| LU18_AD | 4   | 12 | 12 | 70,278,237 | 65,471,490 | 12q15   | 12q14.3  |

|         |     |    |    |            |             |         |         |
|---------|-----|----|----|------------|-------------|---------|---------|
| LU18_AD | 172 | 12 | 12 | 70,279,374 | 71,822,726  | 12q15   | 12q21.1 |
| LU15_L  | 3   | 14 | 3  | 70,280,671 | 46,092,853  | 14q24.2 | 3p21.31 |
| LU3_AD  | 3   | 12 | 12 | 70,310,300 | 38,823,825  | 12q15   | 12q12   |
| LU18_AD | 3   | 12 | 5  | 70,363,125 | 14,770,255  | 12q15   | 5p15.2  |
| LU18_L  | 5   | 12 | 5  | 70,363,345 | 14,769,991  | 12q15   | 5p15.2  |
| LU4_AD  | 4   | 5  | 5  | 70,363,838 | 69,387,308  | 5q13.2  | 5q13.2  |
| LU4_L   | 3   | 6  | 6  | 70,366,413 | 70,407,511  | 6q13    | 6q13    |
| LU18_L  | 19  | 12 | 5  | 70,367,310 | 16,155,324  | 12q15   | 5p15.1  |
| LU18_AD | 20  | 12 | 5  | 70,367,670 | 16,155,208  | 12q15   | 5p15.1  |
| LU18_AD | 23  | 12 | 11 | 70,369,492 | 16,815,364  | 12q15   | 11p15.1 |
| LU18_L  | 20  | 12 | 11 | 70,369,535 | 16,814,006  | 12q15   | 11p15.1 |
| LU4_L   | 3   | 6  | 6  | 70,407,511 | 70,366,413  | 6q13    | 6q13    |
| LU4_L   | 3   | 9  | 9  | 70,462,393 | 157,521     | 9q21.11 | 9p24.3  |
| LU18_L  | 3   | 12 | 1  | 70,483,717 | 55,363,648  | 12q15   | 1p32.3  |
| LU18_AD | 20  | 12 | 12 | 70,494,154 | 70,524,839  | 12q15   | 12q15   |
| LU18_AD | 11  | 12 | 12 | 70,499,584 | 70,178,784  | 12q15   | 12q15   |
| LU18_AD | 20  | 12 | 12 | 70,524,839 | 70,494,154  | 12q15   | 12q15   |
| LU18_L  | 4   | 12 | 11 | 70,533,010 | 13,494,896  | 12q15   | 11p15.2 |
| LU18_AD | 5   | 12 | 12 | 70,587,162 | 66,516,376  | 12q15   | 12q14.3 |
| LU4_L   | 3   | 15 | 15 | 70,594,630 | 70,634,974  | 15q23   | 15q23   |
| LU12_L  | 5   | 6  | 4  | 70,602,824 | 84,912,607  | 6q13    | 4q21.23 |
| LU4_L   | 3   | 15 | 15 | 70,634,974 | 70,594,630  | 15q23   | 15q23   |
| LU18_AD | 6   | 12 | 12 | 70,645,236 | 73,384,883  | 12q15   | 12q21.1 |
| LU18_L  | 7   | 12 | 12 | 70,645,706 | 73,385,694  | 12q15   | 12q21.1 |
| LU15_L  | 3   | 9  | 2  | 70,659,746 | 132,556,893 | 9q21.11 | 2q21.2  |
| LU18_L  | 45  | 12 | 5  | 70,665,897 | 2,852,446   | 12q15   | 5p15.33 |
| LU18_AD | 40  | 12 | 5  | 70,665,956 | 2,852,013   | 12q15   | 5p15.33 |
| LU3_L   | 3   | 23 | 2  | 70,716,005 | 98,439,287  | Xq13.1  | 2q11.2  |
| LU18_L  | 9   | 12 | 12 | 70,717,573 | 69,496,731  | 12q15   | 12q15   |
| LU18_AD | 4   | 12 | 12 | 70,717,852 | 69,496,637  | 12q15   | 12q15   |
| LU18_AD | 6   | 12 | 5  | 70,727,402 | 674,277     | 12q15   | 5p15.33 |
| LU18_AD | 9   | 12 | 11 | 70,761,545 | 16,846,954  | 12q15   | 11p15.1 |
| LU18_L  | 4   | 12 | 11 | 70,762,591 | 16,848,079  | 12q15   | 11p15.1 |
| LU3_AD  | 3   | 12 | 1  | 70,838,624 | 160,694,887 | 12q15   | 1q23.3  |
| LU18_AD | 3   | 2  | 6  | 70,845,917 | 19,540,207  | 2p13.3  | 6p22.3  |
| LU15_AD | 3   | 9  | 9  | 70,859,424 | 42,664,294  | 9q21.11 | 9p12    |
| LU12_L  | 12  | 8  | 8  | 70,862,778 | 60,541,636  | 8q13.3  | 8q12.1  |
| LU18_AD | 3   | 9  | 9  | 70,875,200 | 42,679,048  | 9q21.11 | 9p12    |
| LU14_L  | 4   | 12 | 1  | 70,913,188 | 181,407,746 | 12q15   | 1q25.3  |
| LU18_AD | 11  | 12 | 5  | 70,972,560 | 914,913     | 12q15   | 5p15.33 |
| LU18_L  | 16  | 12 | 5  | 70,972,572 | 915,040     | 12q15   | 5p15.33 |
| LU18_L  | 7   | 12 | 5  | 70,975,421 | 1,073,578   | 12q15   | 5p15.33 |
| LU18_AD | 5   | 12 | 5  | 70,976,755 | 1,074,215   | 12q15   | 5p15.33 |
| LU18_AD | 11  | 12 | 12 | 70,986,558 | 71,022,294  | 12q15   | 12q15   |

|         |    |    |    |            |             |         |          |
|---------|----|----|----|------------|-------------|---------|----------|
| LU18_AD | 11 | 12 | 12 | 71,022,294 | 70,986,558  | 12q15   | 12q15    |
| LU18_AD | 10 | 12 | 5  | 71,057,053 | 1,156,958   | 12q15   | 5p15.33  |
| LU18_L  | 19 | 12 | 5  | 71,060,341 | 1,153,164   | 12q15   | 5p15.33  |
| LU12_L  | 14 | 8  | 8  | 71,074,354 | 137,331,701 | 8q13.3  | 8q24.23  |
| LU12_L  | 11 | 8  | 8  | 71,078,638 | 24,641,771  | 8q13.3  | 8p21.2   |
| LU7_L   | 14 | 12 | 12 | 71,086,119 | 49,110,651  | 12q15   | 12q13.12 |
| LU7_AD  | 5  | 12 | 12 | 71,086,752 | 49,112,489  | 12q15   | 12q13.12 |
| LU21_AD | 4  | 8  | 8  | 71,147,271 | 71,183,968  | 8q13.3  | 8q13.3   |
| LU18_AD | 14 | 12 | 12 | 71,161,018 | 63,606,552  | 12q15   | 12q14.2  |
| LU21_AD | 4  | 8  | 8  | 71,183,968 | 71,147,271  | 8q13.3  | 8q13.3   |
| LU18_AD | 3  | 12 | 5  | 71,187,371 | 797,879     | 12q15   | 5p15.33  |
| LU20_AD | 3  | 5  | 5  | 71,187,539 | 73,158,427  | 5q13.2  | 5q13.2   |
| LU18_L  | 22 | 12 | 5  | 71,187,983 | 711,988     | 12q15   | 5p15.33  |
| LU18_AD | 20 | 12 | 5  | 71,190,350 | 708,756     | 12q15   | 5p15.33  |
| LU18_L  | 45 | 12 | 5  | 71,195,834 | 600,771     | 12q15   | 5p15.33  |
| LU18_AD | 37 | 12 | 5  | 71,196,018 | 600,125     | 12q15   | 5p15.33  |
| LU18_AD | 38 | 12 | 12 | 71,209,582 | 67,727,096  | 12q15   | 12q15    |
| LU18_L  | 31 | 12 | 12 | 71,215,357 | 67,723,954  | 12q15   | 12q15    |
| LU18_L  | 74 | 12 | 5  | 71,220,646 | 698,536     | 12q15   | 5p15.33  |
| LU18_AD | 74 | 12 | 5  | 71,220,679 | 698,259     | 12q15   | 5p15.33  |
| LU18_AD | 8  | 12 | 5  | 71,220,800 | 789,969     | 12q15   | 5p15.33  |
| LU18_AD | 7  | 8  | 5  | 71,238,718 | 178,680,690 | 8q13.3  | 5q35.3   |
| LU8_L   | 3  | 2  | 4  | 71,238,738 | 9,752,045   | 2p13.3  | 4p16.1   |
| LU18_AD | 68 | 8  | 5  | 71,241,281 | 178,672,002 | 8q13.3  | 5q35.3   |
| LU18_L  | 3  | 12 | 5  | 71,244,110 | 660,998     | 12q15   | 5p15.33  |
| LU18_AD | 8  | 12 | 5  | 71,244,421 | 660,515     | 12q15   | 5p15.33  |
| LU18_AD | 4  | 2  | 25 | 71,244,587 | 1,974,557   | 2p13.3  | 25       |
| LU18_L  | 5  | 12 | 5  | 71,244,773 | 28,344,146  | 12q15   | 5p14.1   |
| LU18_L  | 83 | 8  | 5  | 71,245,750 | 178,666,006 | 8q13.3  | 5q35.3   |
| LU18_AD | 3  | 12 | 5  | 71,265,516 | 1,768,300   | 12q15   | 5p15.33  |
| LU18_L  | 14 | 12 | 12 | 71,271,264 | 65,279,546  | 12q15   | 12q14.3  |
| LU18_AD | 5  | 12 | 5  | 71,274,178 | 1,035,190   | 12q15   | 5p15.33  |
| LU18_AD | 8  | 12 | 12 | 71,274,272 | 65,278,216  | 12q15   | 12q14.3  |
| LU18_L  | 10 | 12 | 5  | 71,274,490 | 1,034,578   | 12q15   | 5p15.33  |
| LU18_AD | 5  | 12 | 5  | 71,295,902 | 4,783,868   | 12q15   | 5p15.32  |
| LU7_L   | 4  | 11 | 9  | 71,326,499 | 93,517,174  | 11q13.4 | 9q22.2   |
| LU18_L  | 8  | 12 | 3  | 71,332,798 | 161,232,960 | 12q15   | 3q26.1   |
| LU18_AD | 4  | 12 | 7  | 71,337,436 | 37,828,557  | 12q15   | 7p14.1   |
| LU7_AD  | 3  | 12 | 15 | 71,404,475 | 34,499,974  | 12q15   | 15q14    |
| LU7_L   | 16 | 12 | 8  | 71,439,627 | 97,264,222  | 12q15   | 8q22.1   |
| LU12_L  | 3  | 15 | 15 | 71,441,957 | 71,474,839  | 15q23   | 15q23    |
| LU20_AD | 4  | 2  | 15 | 71,443,018 | 62,567,131  | 2p13.3  | 15q22.2  |
| LU18_L  | 4  | 2  | 15 | 71,447,017 | 62,567,291  | 2p13.3  | 15q22.2  |
| LU3_L   | 3  | 12 | 12 | 71,447,356 | 71,481,697  | 12q15   | 12q15    |

|         |     |    |    |            |             |         |         |
|---------|-----|----|----|------------|-------------|---------|---------|
| LU12_L  | 3   | 2  | 7  | 71,448,193 | 30,571,434  | 2p13.3  | 7p14.3  |
| LU18_L  | 3   | 15 | 1  | 71,453,905 | 171,238,601 | 15q23   | 1q24.3  |
| LU18_AD | 32  | 12 | 5  | 71,474,763 | 1,272,945   | 12q15   | 5p15.33 |
| LU12_L  | 3   | 15 | 15 | 71,474,839 | 71,441,957  | 15q23   | 15q23   |
| LU18_L  | 22  | 12 | 5  | 71,477,717 | 1,272,543   | 12q15   | 5p15.33 |
| LU3_L   | 3   | 12 | 12 | 71,481,697 | 71,447,356  | 12q15   | 12q15   |
| LU5_L   | 3   | 10 | 10 | 71,563,588 | 71,598,409  | 10q22.1 | 10q22.1 |
| LU5_L   | 3   | 10 | 10 | 71,598,409 | 71,563,588  | 10q22.1 | 10q22.1 |
| LU7_L   | 5   | 12 | 12 | 71,607,470 | 66,378,316  | 12q21.1 | 12q14.3 |
| LU21_AD | 3   | 15 | 1  | 71,633,725 | 77,594,654  | 15q23   | 1p31.1  |
| LU7_L   | 8   | 12 | 7  | 71,643,856 | 25,498,258  | 12q21.1 | 7p15.3  |
| LU7_AD  | 3   | 12 | 7  | 71,643,890 | 25,498,393  | 12q21.1 | 7p15.3  |
| LU6_L   | 5   | 12 | 1  | 71,653,420 | 101,929,795 | 12q21.1 | 1p21.2  |
| LU7_AD  | 15  | 12 | 7  | 71,774,181 | 24,697,221  | 12q21.1 | 7p15.3  |
| LU7_L   | 29  | 12 | 7  | 71,774,435 | 24,696,907  | 12q21.1 | 7p15.3  |
| LU18_L  | 4   | 12 | 12 | 71,790,052 | 67,486,972  | 12q21.1 | 12q14.3 |
| LU18_L  | 13  | 12 | 15 | 71,800,637 | 21,905,675  | 12q21.1 | 15q11.2 |
| LU18_AD | 3   | 12 | 12 | 71,801,580 | 68,564,619  | 12q21.1 | 12q15   |
| LU18_AD | 14  | 12 | 15 | 71,801,594 | 21,905,286  | 12q21.1 | 15q11.2 |
| LU18_L  | 150 | 12 | 12 | 71,812,228 | 70,277,781  | 12q21.1 | 12q15   |
| LU18_L  | 19  | 12 | 7  | 71,818,470 | 16,894,626  | 12q21.1 | 7p21.1  |
| LU18_AD | 17  | 12 | 7  | 71,818,734 | 16,895,238  | 12q21.1 | 7p21.1  |
| LU20_L  | 3   | 1  | 1  | 71,820,730 | 71,850,496  | 1p31.1  | 1p31.1  |
| LU18_L  | 6   | 12 | 5  | 71,821,903 | 27,239,204  | 12q21.1 | 5p14.1  |
| LU18_AD | 172 | 12 | 12 | 71,822,726 | 70,279,374  | 12q21.1 | 12q15   |
| LU18_AD | 12  | 12 | 5  | 71,823,149 | 27,239,691  | 12q21.1 | 5p14.1  |
| LU20_L  | 3   | 1  | 1  | 71,850,496 | 71,820,730  | 1p31.1  | 1p31.1  |
| LU3_L   | 3   | 10 | 4  | 71,911,758 | 121,263,909 | 10q22.1 | 4q27    |
| LU15_AD | 7   | 9  | 9  | 71,935,671 | 103,545,276 | 9q21.11 | 9q31.1  |
| LU4_AD  | 3   | 6  | 6  | 71,957,048 | 71,995,212  | 6q13    | 6q13    |
| LU16_L  | 3   | 18 | 3  | 71,965,966 | 86,586,262  | 18q22.3 | 3p12.1  |
| LU3_AD  | 3   | 1  | 23 | 71,974,309 | 99,824,438  | 1p31.1  | Xq22.1  |
| LU4_AD  | 3   | 6  | 6  | 71,995,212 | 71,957,048  | 6q13    | 6q13    |
| LU3_AD  | 3   | 12 | 12 | 72,012,416 | 74,678,084  | 12q21.1 | 12q21.1 |
| LU7_L   | 22  | 12 | 12 | 72,053,851 | 61,334,496  | 12q21.1 | 12q14.1 |
| LU7_AD  | 8   | 12 | 12 | 72,054,181 | 61,332,863  | 12q21.1 | 12q14.1 |
| LU7_L   | 49  | 12 | 12 | 72,058,445 | 63,475,829  | 12q21.1 | 12q14.2 |
| LU7_AD  | 16  | 12 | 12 | 72,058,482 | 63,475,164  | 12q21.1 | 12q14.2 |
| LU7_AD  | 13  | 12 | 12 | 72,084,904 | 72,861,502  | 12q21.1 | 12q21.1 |
| LU7_L   | 34  | 12 | 12 | 72,084,992 | 72,862,322  | 12q21.1 | 12q21.1 |
| LU3_L   | 6   | 2  | 2  | 72,107,141 | 72,137,418  | 2p13.2  | 2p13.2  |
| LU7_L   | 4   | 12 | 12 | 72,114,434 | 68,053,873  | 12q21.1 | 12q15   |
| LU7_L   | 9   | 5  | 5  | 72,135,956 | 100,596,822 | 5q13.2  | 5q21.1  |
| LU3_L   | 6   | 2  | 2  | 72,137,418 | 72,107,141  | 2p13.2  | 2p13.2  |

|         |    |    |    |            |             |          |         |
|---------|----|----|----|------------|-------------|----------|---------|
| LU7_AD  | 5  | 5  | 5  | 72,138,954 | 100,593,395 | 5q13.2   | 5q21.1  |
| LU5_L   | 3  | 5  | 11 | 72,223,141 | 110,271,391 | 5q13.2   | 11q22.3 |
| LU11_AD | 3  | 5  | 7  | 72,227,876 | 54,024,247  | 5q13.2   | 7p11.2  |
| LU3_L   | 5  | 8  | 8  | 72,238,362 | 72,268,281  | 8q13.3   | 8q13.3  |
| LU18_L  | 16 | 12 | 5  | 72,259,066 | 6,939,995   | 12q21.1  | 5p15.31 |
| LU18_AD | 13 | 12 | 5  | 72,260,051 | 6,936,700   | 12q21.1  | 5p15.31 |
| LU3_L   | 5  | 8  | 8  | 72,268,281 | 72,238,362  | 8q13.3   | 8q13.3  |
| LU8_L   | 5  | 18 | 18 | 72,279,884 | 72,335,345  | 18q22.3  | 18q22.3 |
| LU18_L  | 3  | 5  | 6  | 72,316,433 | 160,514,663 | 5q13.2   | 6q25.3  |
| LU8_L   | 5  | 18 | 18 | 72,335,345 | 72,279,884  | 18q22.3  | 18q22.3 |
| LU18_L  | 5  | 12 | 11 | 72,378,376 | 22,690,709  | 12q21.1  | 11p14.3 |
| LU3_AD  | 5  | 12 | 12 | 72,421,885 | 18,583,646  | 12q21.1  | 12p12.3 |
| LU4_L   | 3  | 6  | 2  | 72,497,126 | 148,070,707 | 6q13     | 2q22.3  |
| LU12_L  | 4  | 6  | 13 | 72,498,992 | 111,843,771 | 6q13     | 13q34   |
| LU6_L   | 4  | 15 | 6  | 72,499,003 | 5,973,660   | 15q23    | 6p25.1  |
| LU20_AD | 3  | 4  | 6  | 72,506,385 | 47,612,151  | 4q13.3   | 6p12.3  |
| LU12_AD | 6  | 15 | 11 | 72,507,445 | 82,278,763  | 15q23    | 11q14.1 |
| LU4_AD  | 3  | 23 | 16 | 72,536,844 | 34,305,378  | Xq13.2   | 16p11.2 |
| LU3_L   | 3  | 13 | 3  | 72,594,774 | 156,335,587 | 13q21.33 | 3q25.31 |
| LU18_L  | 20 | 12 | 7  | 72,599,414 | 35,171,136  | 12q21.1  | 7p14.2  |
| LU18_AD | 15 | 12 | 7  | 72,600,535 | 35,170,368  | 12q21.1  | 7p14.2  |
| LU5_AD  | 3  | 12 | 12 | 72,605,009 | 72,636,541  | 12q21.1  | 12q21.1 |
| LU18_AD | 32 | 6  | 1  | 72,623,274 | 18,906,460  | 6q13     | 1p36.13 |
| LU18_L  | 55 | 6  | 1  | 72,624,998 | 18,904,760  | 6q13     | 1p36.13 |
| LU5_AD  | 3  | 12 | 12 | 72,636,541 | 72,605,009  | 12q21.1  | 12q21.1 |
| LU3_AD  | 5  | 15 | 15 | 72,765,145 | 73,864,689  | 15q24.1  | 15q24.1 |
| LU6_L   | 4  | 16 | 16 | 72,790,922 | 73,101,839  | 16q22.2  | 16q22.3 |
| LU21_L  | 3  | 8  | 8  | 72,797,495 | 72,827,136  | 8q13.3   | 8q13.3  |
| LU4_L   | 4  | 15 | 15 | 72,804,037 | 72,839,151  | 15q24.1  | 15q24.1 |
| LU21_L  | 3  | 8  | 8  | 72,827,136 | 72,797,495  | 8q13.3   | 8q13.3  |
| LU4_L   | 4  | 15 | 15 | 72,839,151 | 72,804,037  | 15q24.1  | 15q24.1 |
| LU7_L   | 17 | 12 | 12 | 72,839,711 | 73,526,282  | 12q21.1  | 12q21.1 |
| LU7_AD  | 3  | 12 | 12 | 72,841,462 | 73,525,321  | 12q21.1  | 12q21.1 |
| LU18_L  | 3  | 18 | 18 | 72,851,898 | 72,891,148  | 18q22.3  | 18q22.3 |
| LU7_AD  | 13 | 12 | 12 | 72,861,502 | 72,084,904  | 12q21.1  | 12q21.1 |
| LU7_L   | 34 | 12 | 12 | 72,862,322 | 72,084,992  | 12q21.1  | 12q21.1 |
| LU18_L  | 3  | 18 | 18 | 72,891,148 | 72,851,898  | 18q22.3  | 18q22.3 |
| LU14_L  | 3  | 15 | 15 | 72,947,109 | 31,082,107  | 15q24.1  | 15q13.2 |
| LU3_L   | 3  | 15 | 15 | 72,958,888 | 32,684,306  | 15q24.1  | 15q13.3 |
| LU4_L   | 4  | 15 | 15 | 72,963,342 | 62,533,077  | 15q24.1  | 15q22.2 |
| LU12_L  | 47 | 8  | 8  | 72,983,719 | 97,220,063  | 8q13.3   | 8q22.1  |
| LU12_L  | 13 | 8  | 8  | 72,989,303 | 69,939,892  | 8q13.3   | 8q13.2  |
| LU20_L  | 4  | 4  | 1  | 73,030,844 | 196,181,108 | 4q13.3   | 1q31.3  |
| LU21_AD | 5  | 4  | 4  | 73,038,589 | 121,044,292 | 4q13.3   | 4q27    |

|         |    |    |    |            |             |         |          |
|---------|----|----|----|------------|-------------|---------|----------|
| LU6_L   | 4  | 16 | 16 | 73,101,839 | 72,790,922  | 16q22.3 | 16q22.2  |
| LU18_AD | 12 | 3  | 5  | 73,112,801 | 1,613,503   | 3p13    | 5p15.33  |
| LU18_L  | 14 | 3  | 5  | 73,114,729 | 1,613,472   | 3p13    | 5p15.33  |
| LU11_L  | 5  | 7  | 20 | 73,123,141 | 56,455,619  | 7q11.23 | 20q13.31 |
| LU20_AD | 3  | 5  | 5  | 73,158,427 | 71,187,539  | 5q13.2  | 5q13.2   |
| LU20_AD | 4  | 14 | 14 | 73,164,483 | 73,199,097  | 14q24.2 | 14q24.2  |
| LU20_AD | 4  | 14 | 14 | 73,199,097 | 73,164,483  | 14q24.2 | 14q24.2  |
| LU4_AD  | 4  | 3  | 1  | 73,200,005 | 96,613,516  | 3p13    | 1p21.3   |
| LU12_L  | 11 | 1  | 1  | 73,231,885 | 109,919,698 | 1p31.1  | 1p13.3   |
| LU21_L  | 3  | 14 | 14 | 73,237,063 | 73,270,980  | 14q24.2 | 14q24.2  |
| LU21_L  | 3  | 14 | 14 | 73,270,980 | 73,237,063  | 14q24.2 | 14q24.2  |
| LU12_L  | 6  | 1  | 1  | 73,295,143 | 82,427,145  | 1p31.1  | 1p31.1   |
| LU12_L  | 9  | 1  | 1  | 73,296,183 | 73,436,926  | 1p31.1  | 1p31.1   |
| LU3_L   | 3  | 15 | 15 | 73,315,742 | 73,358,690  | 15q24.1 | 15q24.1  |
| LU12_L  | 7  | 1  | 1  | 73,330,785 | 80,531,305  | 1p31.1  | 1p31.1   |
| LU12_L  | 5  | 1  | 1  | 73,354,360 | 79,703,160  | 1p31.1  | 1p31.1   |
| LU7_AD  | 5  | 14 | 20 | 73,357,682 | 2,527,625   | 14q24.2 | 20p13    |
| LU3_L   | 3  | 15 | 15 | 73,358,690 | 73,315,742  | 15q24.1 | 15q24.1  |
| LU12_L  | 3  | 1  | 1  | 73,361,369 | 106,888,769 | 1p31.1  | 1p21.1   |
| LU7_L   | 10 | 14 | 20 | 73,361,574 | 2,532,334   | 14q24.2 | 20p13    |
| LU12_L  | 5  | 1  | 1  | 73,375,595 | 104,122,986 | 1p31.1  | 1p21.1   |
| LU12_L  | 10 | 1  | 1  | 73,379,044 | 93,839,370  | 1p31.1  | 1p22.1   |
| LU18_AD | 6  | 12 | 12 | 73,384,883 | 70,645,236  | 12q21.1 | 12q15    |
| LU18_AD | 6  | 12 | 11 | 73,385,458 | 5,595,619   | 12q21.1 | 11p15.4  |
| LU18_L  | 7  | 12 | 12 | 73,385,694 | 70,645,706  | 12q21.1 | 12q15    |
| LU18_L  | 5  | 12 | 11 | 73,387,926 | 4,530,266   | 12q21.1 | 11p15.4  |
| LU11_L  | 7  | 4  | 12 | 73,433,765 | 68,132,925  | 4q13.3  | 12q15    |
| LU12_L  | 9  | 1  | 1  | 73,436,926 | 73,296,183  | 1p31.1  | 1p31.1   |
| LU3_AD  | 5  | 12 | 12 | 73,489,536 | 40,451,561  | 12q21.1 | 12q12    |
| LU12_L  | 4  | 1  | 1  | 73,491,754 | 94,097,347  | 1p31.1  | 1p22.1   |
| LU12_L  | 3  | 1  | 1  | 73,492,243 | 76,883,951  | 1p31.1  | 1p31.1   |
| LU7_AD  | 3  | 12 | 12 | 73,525,321 | 72,841,462  | 12q21.1 | 12q21.1  |
| LU7_L   | 17 | 12 | 12 | 73,526,282 | 72,839,711  | 12q21.1 | 12q21.1  |
| LU12_L  | 9  | 1  | 1  | 73,578,896 | 103,298,406 | 1p31.1  | 1p21.1   |
| LU7_AD  | 37 | 12 | 10 | 73,581,325 | 23,729,238  | 12q21.1 | 10p12.2  |
| LU7_L   | 71 | 12 | 10 | 73,583,195 | 23,729,507  | 12q21.1 | 10p12.2  |
| LU12_L  | 16 | 1  | 1  | 73,585,721 | 95,902,063  | 1p31.1  | 1p21.3   |
| LU12_L  | 9  | 1  | 1  | 73,712,191 | 85,528,983  | 1p31.1  | 1p22.3   |
| LU14_AD | 3  | 10 | 7  | 73,714,512 | 12,629,328  | 10q22.1 | 7p21.3   |
| LU12_L  | 12 | 1  | 1  | 73,715,449 | 85,714,808  | 1p31.1  | 1p22.3   |
| LU12_L  | 14 | 1  | 1  | 73,735,464 | 102,063,777 | 1p31.1  | 1p21.2   |
| LU12_L  | 16 | 8  | 8  | 73,803,411 | 76,419,118  | 8q13.3  | 8q21.11  |
| LU5_AD  | 8  | 6  | 6  | 73,846,208 | 68,234,461  | 6q13    | 6q12     |
| LU5_L   | 3  | 6  | 6  | 73,846,679 | 68,236,475  | 6q13    | 6q12     |

|         |    |    |    |            |             |         |          |
|---------|----|----|----|------------|-------------|---------|----------|
| LU12_L  | 27 | 8  | 8  | 73,854,020 | 139,577,833 | 8q13.3  | 8q24.23  |
| LU5_AD  | 3  | 6  | 12 | 73,856,692 | 22,385,695  | 6q13    | 12p12.1  |
| LU3_AD  | 5  | 15 | 15 | 73,864,689 | 72,765,145  | 15q24.1 | 15q24.1  |
| LU20_AD | 3  | 3  | 5  | 73,868,393 | 118,205,580 | 3p13    | 5q23.1   |
| LU6_L   | 35 | 9  | 9  | 73,905,759 | 73,940,332  | 9q21.12 | 9q21.12  |
| LU6_AD  | 9  | 9  | 9  | 73,909,051 | 73,941,653  | 9q21.12 | 9q21.12  |
| LU18_AD | 3  | 8  | 18 | 73,932,898 | 14,380,030  | 8q21.11 | 18p11.21 |
| LU6_L   | 35 | 9  | 9  | 73,940,332 | 73,905,759  | 9q21.12 | 9q21.12  |
| LU6_AD  | 9  | 9  | 9  | 73,941,653 | 73,909,051  | 9q21.12 | 9q21.12  |
| LU18_AD | 4  | 8  | 23 | 73,957,654 | 83,003,971  | 8q21.11 | Xq21.1   |
| LU18_L  | 15 | 12 | 5  | 74,031,126 | 20,751,984  | 12q21.1 | 5p14.3   |
| LU18_AD | 14 | 12 | 5  | 74,031,148 | 20,751,960  | 12q21.1 | 5p14.3   |
| LU3_L   | 3  | 8  | 8  | 74,124,150 | 74,154,054  | 8q21.11 | 8q21.11  |
| LU3_L   | 3  | 8  | 8  | 74,154,054 | 74,124,150  | 8q21.11 | 8q21.11  |
| LU15_AD | 4  | 2  | 2  | 74,156,664 | 74,190,385  | 2p13.1  | 2p13.1   |
| LU15_AD | 4  | 2  | 2  | 74,190,385 | 74,156,664  | 2p13.1  | 2p13.1   |
| LU12_L  | 8  | 1  | 1  | 74,216,241 | 93,971,649  | 1p31.1  | 1p22.1   |
| LU12_L  | 11 | 1  | 1  | 74,218,739 | 77,779,837  | 1p31.1  | 1p31.1   |
| LU12_L  | 4  | 1  | 1  | 74,221,666 | 90,464,010  | 1p31.1  | 1p22.2   |
| LU12_L  | 6  | 1  | 1  | 74,222,049 | 84,642,678  | 1p31.1  | 1p31.1   |
| LU8_L   | 3  | 4  | 5  | 74,234,453 | 1,579,275   | 4q13.3  | 5p15.33  |
| LU18_AD | 3  | 4  | 5  | 74,236,597 | 1,578,831   | 4q13.3  | 5p15.33  |
| LU12_L  | 18 | 1  | 1  | 74,251,737 | 91,636,872  | 1p31.1  | 1p22.2   |
| LU3_AD  | 5  | 12 | 12 | 74,253,895 | 39,086,108  | 12q21.1 | 12q12    |
| LU12_AD | 3  | 12 | 18 | 74,254,366 | 44,355,424  | 12q21.1 | 18q21.1  |
| LU12_L  | 11 | 1  | 1  | 74,257,154 | 97,226,733  | 1p31.1  | 1p21.3   |
| LU12_L  | 20 | 1  | 1  | 74,262,177 | 99,414,426  | 1p31.1  | 1p21.3   |
| LU12_L  | 7  | 1  | 1  | 74,269,615 | 80,704,166  | 1p31.1  | 1p31.1   |
| LU12_L  | 4  | 1  | 1  | 74,276,194 | 103,477,630 | 1p31.1  | 1p21.1   |
| LU12_L  | 13 | 1  | 1  | 74,292,500 | 83,297,365  | 1p31.1  | 1p31.1   |
| LU8_L   | 16 | 12 | 12 | 74,301,774 | 74,425,078  | 12q21.1 | 12q21.1  |
| LU8_AD  | 7  | 12 | 12 | 74,304,245 | 74,425,551  | 12q21.1 | 12q21.1  |
| LU12_L  | 12 | 1  | 1  | 74,308,228 | 107,750,664 | 1p31.1  | 1p13.3   |
| LU12_L  | 10 | 1  | 1  | 74,323,355 | 80,514,474  | 1p31.1  | 1p31.1   |
| LU18_AD | 5  | 12 | 25 | 74,326,798 | 1,635,702   | 12q21.1 | 25       |
| LU18_L  | 5  | 12 | 25 | 74,327,559 | 1,635,452   | 12q21.1 | 25       |
| LU12_L  | 11 | 1  | 1  | 74,344,084 | 99,951,290  | 1p31.1  | 1p21.2   |
| LU12_L  | 5  | 1  | 1  | 74,380,185 | 76,326,140  | 1p31.1  | 1p31.1   |
| LU12_L  | 11 | 1  | 1  | 74,406,487 | 107,749,931 | 1p31.1  | 1p13.3   |
| LU20_L  | 3  | 13 | 13 | 74,407,158 | 74,443,900  | 13q22.1 | 13q22.1  |
| LU8_L   | 16 | 12 | 12 | 74,425,078 | 74,301,774  | 12q21.1 | 12q21.1  |
| LU8_AD  | 7  | 12 | 12 | 74,425,551 | 74,304,245  | 12q21.1 | 12q21.1  |
| LU20_L  | 3  | 13 | 13 | 74,443,900 | 74,407,158  | 13q22.1 | 13q22.1  |
| LU12_L  | 4  | 1  | 1  | 74,464,342 | 107,373,725 | 1p31.1  | 1p13.3   |

|         |    |    |    |            |             |         |         |
|---------|----|----|----|------------|-------------|---------|---------|
| LU15_L  | 3  | 4  | 4  | 74,486,900 | 74,518,347  | 4q13.3  | 4q13.3  |
| LU12_L  | 13 | 1  | 1  | 74,489,027 | 85,815,737  | 1p31.1  | 1p22.3  |
| LU3_AD  | 3  | 6  | 6  | 74,510,801 | 74,541,409  | 6q13    | 6q13    |
| LU12_L  | 6  | 1  | 1  | 74,513,330 | 81,083,673  | 1p31.1  | 1p31.1  |
| LU12_L  | 4  | 1  | 1  | 74,514,481 | 76,186,938  | 1p31.1  | 1p31.1  |
| LU12_L  | 9  | 1  | 1  | 74,516,363 | 77,888,188  | 1p31.1  | 1p31.1  |
| LU15_L  | 3  | 4  | 4  | 74,518,347 | 74,486,900  | 4q13.3  | 4q13.3  |
| LU12_L  | 10 | 1  | 1  | 74,522,129 | 105,588,081 | 1p31.1  | 1p21.1  |
| LU18_L  | 26 | 12 | 11 | 74,529,640 | 19,621,346  | 12q21.1 | 11p15.1 |
| LU18_AD | 22 | 12 | 11 | 74,532,208 | 19,621,351  | 12q21.1 | 11p15.1 |
| LU3_AD  | 3  | 6  | 6  | 74,541,409 | 74,510,801  | 6q13    | 6q13    |
| LU12_L  | 3  | 1  | 1  | 74,548,986 | 84,819,840  | 1p31.1  | 1p31.1  |
| LU12_L  | 8  | 1  | 1  | 74,557,423 | 108,209,334 | 1p31.1  | 1p13.3  |
| LU12_L  | 4  | 1  | 1  | 74,564,523 | 83,378,519  | 1p31.1  | 1p31.1  |
| LU12_L  | 11 | 1  | 1  | 74,566,756 | 96,449,103  | 1p31.1  | 1p21.3  |
| LU4_L   | 3  | 13 | 13 | 74,591,081 | 74,625,006  | 13q22.1 | 13q22.1 |
| LU4_L   | 3  | 13 | 13 | 74,625,006 | 74,591,081  | 13q22.1 | 13q22.1 |
| LU12_L  | 11 | 1  | 1  | 74,654,459 | 100,303,275 | 1p31.1  | 1p21.2  |
| LU15_AD | 3  | 12 | 6  | 74,661,691 | 123,069,148 | 12q21.1 | 6q22.31 |
| LU18_AD | 4  | 12 | 6  | 74,663,418 | 123,065,820 | 12q21.1 | 6q22.31 |
| LU12_L  | 5  | 1  | 1  | 74,667,614 | 104,406,467 | 1p31.1  | 1p21.1  |
| LU12_L  | 8  | 1  | 1  | 74,677,512 | 77,628,298  | 1p31.1  | 1p31.1  |
| LU3_AD  | 3  | 12 | 12 | 74,678,084 | 72,012,416  | 12q21.1 | 12q21.1 |
| LU12_L  | 13 | 1  | 1  | 74,684,786 | 86,878,048  | 1p31.1  | 1p22.3  |
| LU12_L  | 11 | 1  | 1  | 74,692,751 | 109,150,600 | 1p31.1  | 1p13.3  |
| LU18_L  | 12 | 12 | 7  | 74,749,739 | 24,580,932  | 12q21.1 | 7p15.3  |
| LU7_L   | 8  | 13 | 13 | 74,771,565 | 75,721,116  | 13q22.1 | 13q22.2 |
| LU4_AD  | 4  | 1  | 19 | 74,771,728 | 43,032,863  | 1p31.1  | 19q13.2 |
| LU7_AD  | 4  | 13 | 13 | 74,771,988 | 75,721,621  | 13q22.1 | 13q22.2 |
| LU4_L   | 3  | 3  | 3  | 74,798,182 | 74,829,686  | 3p12.3  | 3p12.3  |
| LU12_AD | 3  | 4  | 1  | 74,815,212 | 33,533,152  | 4q13.3  | 1p35.1  |
| LU12_L  | 8  | 1  | 1  | 74,822,838 | 96,059,508  | 1p31.1  | 1p21.3  |
| LU4_L   | 3  | 3  | 3  | 74,829,686 | 74,798,182  | 3p12.3  | 3p12.3  |
| LU12_L  | 8  | 1  | 1  | 74,852,538 | 92,879,907  | 1p31.1  | 1p22.1  |
| LU12_L  | 27 | 1  | 1  | 74,860,023 | 86,921,071  | 1p31.1  | 1p22.3  |
| LU12_L  | 28 | 1  | 1  | 74,860,712 | 100,247,500 | 1p31.1  | 1p21.2  |
| LU3_AD  | 3  | 12 | 12 | 74,904,723 | 38,751,078  | 12q21.1 | 12q12   |
| LU12_L  | 6  | 1  | 1  | 74,994,103 | 108,590,287 | 1p31.1  | 1p13.3  |
| LU3_AD  | 3  | 13 | 13 | 75,016,391 | 75,047,256  | 13q22.1 | 13q22.1 |
| LU3_AD  | 3  | 13 | 13 | 75,047,256 | 75,016,391  | 13q22.1 | 13q22.1 |
| LU18_L  | 3  | 12 | 12 | 75,107,371 | 75,158,734  | 12q21.1 | 12q21.1 |
| LU4_AD  | 3  | 23 | 6  | 75,121,255 | 106,679,619 | Xq13.3  | 6q21    |
| LU4_AD  | 4  | 23 | 23 | 75,126,139 | 75,167,620  | Xq13.3  | Xq13.3  |
| LU18_L  | 3  | 12 | 12 | 75,158,734 | 75,107,371  | 12q21.1 | 12q21.1 |



|         |    |    |    |            |             |         |         |
|---------|----|----|----|------------|-------------|---------|---------|
| LU12_L  | 6  | 1  | 1  | 75,159,141 | 97,100,967  | 1p31.1  | 1p21.3  |
| LU4_AD  | 4  | 23 | 23 | 75,167,620 | 75,126,139  | Xq13.3  | Xq13.3  |
| LU12_L  | 7  | 1  | 1  | 75,172,853 | 95,197,167  | 1p31.1  | 1p21.3  |
| LU16_AD | 5  | 12 | 14 | 75,211,468 | 51,053,399  | 12q21.1 | 14q22.1 |
| LU12_L  | 10 | 1  | 1  | 75,225,543 | 93,379,387  | 1p31.1  | 1p22.1  |
| LU20_L  | 3  | 23 | 10 | 75,250,527 | 100,772,142 | Xq13.3  | 10q24.2 |
| LU21_L  | 18 | 5  | 5  | 75,281,816 | 148,767,516 | 5q13.3  | 5q32    |
| LU21_AD | 21 | 5  | 5  | 75,282,221 | 148,767,750 | 5q13.3  | 5q32    |
| LU16_AD | 8  | 12 | 14 | 75,340,495 | 51,259,980  | 12q21.1 | 14q22.1 |
| LU12_L  | 9  | 1  | 1  | 75,434,427 | 98,476,719  | 1p31.1  | 1p21.3  |
| LU12_L  | 18 | 1  | 1  | 75,439,628 | 87,046,287  | 1p31.1  | 1p22.3  |
| LU18_L  | 9  | 12 | 11 | 75,446,258 | 2,381,189   | 12q21.1 | 11p15.5 |
| LU18_AD | 10 | 12 | 11 | 75,446,462 | 2,380,674   | 12q21.1 | 11p15.5 |
| LU18_AD | 6  | 12 | 7  | 75,447,147 | 10,603,140  | 12q21.1 | 7p21.3  |
| LU12_L  | 5  | 1  | 1  | 75,449,313 | 93,090,786  | 1p31.1  | 1p22.1  |
| LU20_AD | 4  | 9  | 9  | 75,454,727 | 34,937,867  | 9q21.13 | 9p13.3  |
| LU6_L   | 6  | 16 | 5  | 75,495,173 | 127,123,161 | 16q23.1 | 5q23.2  |
| LU18_AD | 3  | 18 | 18 | 75,520,514 | 75,557,152  | 18q23   | 18q23   |
| LU15_L  | 3  | 15 | 15 | 75,541,980 | 85,722,255  | 15q24.2 | 15q25.3 |
| LU21_AD | 3  | 3  | 15 | 75,556,639 | 89,082,619  | 3p12.3  | 15q25.3 |
| LU18_AD | 3  | 18 | 18 | 75,557,152 | 75,520,514  | 18q23   | 18q23   |
| LU3_L   | 4  | 12 | 12 | 75,561,244 | 77,151,297  | 12q21.1 | 12q21.2 |
| LU12_L  | 7  | 3  | 8  | 75,585,360 | 11,407,532  | 3p12.3  | 8p23.1  |
| LU15_L  | 4  | 15 | 15 | 75,592,053 | 79,027,205  | 15q24.2 | 15q25.1 |
| LU3_L   | 3  | 15 | 15 | 75,595,768 | 102,306,444 | 15q24.2 | 15q26.3 |
| LU12_L  | 7  | 1  | 1  | 75,607,215 | 104,534,006 | 1p31.1  | 1p21.1  |
| LU12_L  | 5  | 1  | 1  | 75,612,790 | 97,154,074  | 1p31.1  | 1p21.3  |
| LU3_AD  | 15 | 12 | 12 | 75,614,678 | 17,709,902  | 12q21.1 | 12p12.3 |
| LU12_L  | 12 | 1  | 1  | 75,617,661 | 93,880,801  | 1p31.1  | 1p22.1  |
| LU12_L  | 8  | 1  | 1  | 75,627,542 | 99,581,245  | 1p31.1  | 1p21.3  |
| LU12_L  | 15 | 1  | 1  | 75,669,913 | 86,668,344  | 1p31.1  | 1p22.3  |
| LU12_L  | 4  | 1  | 1  | 75,672,611 | 95,251,892  | 1p31.1  | 1p21.3  |
| LU12_L  | 10 | 1  | 1  | 75,680,237 | 105,472,252 | 1p31.1  | 1p21.1  |
| LU20_L  | 3  | 7  | 7  | 75,705,631 | 63,205,584  | 7q11.23 | 7q11.21 |
| LU4_AD  | 3  | 7  | 7  | 75,706,779 | 56,923,588  | 7q11.23 | 7p11.2  |
| LU18_AD | 3  | 13 | 13 | 75,712,112 | 75,761,790  | 13q22.2 | 13q22.2 |
| LU7_L   | 8  | 13 | 13 | 75,721,116 | 74,771,565  | 13q22.2 | 13q22.1 |
| LU7_AD  | 4  | 13 | 13 | 75,721,621 | 74,771,988  | 13q22.2 | 13q22.1 |
| LU20_AD | 3  | 3  | 3  | 75,725,762 | 21,401,124  | 3p12.3  | 3p24.3  |
| LU18_AD | 3  | 13 | 13 | 75,761,790 | 75,712,112  | 13q22.2 | 13q22.2 |
| LU7_AD  | 3  | 8  | 8  | 75,763,449 | 81,821,624  | 8q21.11 | 8q21.13 |
| LU7_L   | 4  | 8  | 8  | 75,764,173 | 81,822,506  | 8q21.11 | 8q21.13 |
| LU12_L  | 8  | 1  | 1  | 75,875,860 | 95,741,177  | 1p31.1  | 1p21.3  |
| LU4_L   | 3  | 3  | 25 | 75,900,047 | 1,812,773   | 3p12.3  | 25      |

|         |    |    |    |            |             |         |          |
|---------|----|----|----|------------|-------------|---------|----------|
| LU12_L  | 10 | 1  | 1  | 75,902,112 | 99,419,298  | 1p31.1  | 1p21.3   |
| LU12_L  | 10 | 1  | 1  | 75,914,637 | 90,537,257  | 1p31.1  | 1p22.2   |
| LU18_AD | 5  | 8  | 6  | 75,958,368 | 6,063,234   | 8q21.11 | 6p25.1   |
| LU4_AD  | 5  | 15 | 9  | 76,030,078 | 131,013,375 | 15q24.2 | 9q34.11  |
| LU18_L  | 4  | 15 | 9  | 76,030,292 | 131,013,132 | 15q24.2 | 9q34.11  |
| LU12_L  | 10 | 1  | 1  | 76,040,346 | 78,691,930  | 1p31.1  | 1p31.1   |
| LU12_L  | 12 | 1  | 1  | 76,041,446 | 96,580,006  | 1p31.1  | 1p21.3   |
| LU12_L  | 6  | 1  | 1  | 76,088,510 | 77,385,607  | 1p31.1  | 1p31.1   |
| LU12_L  | 7  | 1  | 1  | 76,089,228 | 101,907,490 | 1p31.1  | 1p21.2   |
| LU18_L  | 3  | 2  | 14 | 76,097,417 | 22,706,502  | 2p12    | 14q11.2  |
| LU21_AD | 3  | 2  | 2  | 76,106,451 | 31,854,076  | 2p12    | 2p23.1   |
| LU4_AD  | 3  | 17 | 1  | 76,109,356 | 43,351,931  | 17q25.3 | 1p34.2   |
| LU3_AD  | 4  | 9  | 9  | 76,124,696 | 76,154,209  | 9q21.13 | 9q21.13  |
| LU3_AD  | 4  | 9  | 9  | 76,154,209 | 76,124,696  | 9q21.13 | 9q21.13  |
| LU3_L   | 3  | 12 | 12 | 76,158,088 | 53,309,863  | 12q21.2 | 12q13.13 |
| LU12_L  | 4  | 1  | 1  | 76,186,938 | 74,514,481  | 1p31.1  | 1p31.1   |
| LU12_L  | 5  | 7  | 1  | 76,211,767 | 83,435,575  | 7q11.23 | 1p31.1   |
| LU12_L  | 9  | 1  | 1  | 76,233,362 | 86,888,295  | 1p31.1  | 1p22.3   |
| LU3_L   | 5  | 4  | 4  | 76,266,749 | 76,298,500  | 4q13.3  | 4q13.3   |
| LU12_L  | 10 | 1  | 1  | 76,295,847 | 96,594,117  | 1p31.1  | 1p21.3   |
| LU3_L   | 5  | 4  | 4  | 76,298,500 | 76,266,749  | 4q13.3  | 4q13.3   |
| LU12_L  | 5  | 1  | 1  | 76,326,140 | 74,380,185  | 1p31.1  | 1p31.1   |
| LU12_L  | 6  | 1  | 1  | 76,329,878 | 95,790,930  | 1p31.1  | 1p21.3   |
| LU12_L  | 5  | 1  | 1  | 76,369,184 | 85,824,935  | 1p31.1  | 1p22.3   |
| LU8_L   | 4  | 16 | 11 | 76,371,262 | 27,157,438  | 16q23.1 | 11p14.2  |
| LU12_L  | 12 | 1  | 1  | 76,400,821 | 87,728,827  | 1p31.1  | 1p22.3   |
| LU12_L  | 16 | 8  | 8  | 76,419,118 | 73,803,411  | 8q21.11 | 8q13.3   |
| LU12_L  | 10 | 1  | 1  | 76,430,394 | 87,661,203  | 1p31.1  | 1p22.3   |
| LU12_L  | 15 | 1  | 1  | 76,531,877 | 87,421,783  | 1p31.1  | 1p22.3   |
| LU3_L   | 3  | 8  | 8  | 76,551,571 | 76,589,128  | 8q21.11 | 8q21.11  |
| LU12_L  | 6  | 1  | 1  | 76,561,520 | 76,795,076  | 1p31.1  | 1p31.1   |
| LU12_L  | 6  | 1  | 1  | 76,563,353 | 108,593,537 | 1p31.1  | 1p13.3   |
| LU3_L   | 3  | 8  | 8  | 76,589,128 | 76,551,571  | 8q21.11 | 8q21.11  |
| LU16_AD | 26 | 12 | 12 | 76,601,352 | 64,280,551  | 12q21.2 | 12q14.2  |
| LU16_L  | 4  | 12 | 12 | 76,603,666 | 64,284,063  | 12q21.2 | 12q14.2  |
| LU18_AD | 13 | 12 | 7  | 76,606,823 | 9,529,537   | 12q21.2 | 7p21.3   |
| LU18_L  | 8  | 12 | 7  | 76,608,296 | 9,529,254   | 12q21.2 | 7p21.3   |
| LU12_L  | 4  | 1  | 1  | 76,623,782 | 95,248,275  | 1p31.1  | 1p21.3   |
| LU12_L  | 19 | 1  | 1  | 76,627,487 | 95,388,236  | 1p31.1  | 1p21.3   |
| LU12_L  | 15 | 1  | 1  | 76,632,720 | 104,066,140 | 1p31.1  | 1p21.1   |
| LU5_AD  | 3  | 1  | 1  | 76,637,029 | 76,667,916  | 1p31.1  | 1p31.1   |
| LU12_L  | 7  | 1  | 1  | 76,657,485 | 92,819,398  | 1p31.1  | 1p22.1   |
| LU3_L   | 3  | 18 | 18 | 76,665,968 | 76,720,347  | 18q23   | 18q23    |
| LU5_AD  | 3  | 1  | 1  | 76,667,916 | 76,637,029  | 1p31.1  | 1p31.1   |

|         |    |    |    |            |             |         |         |
|---------|----|----|----|------------|-------------|---------|---------|
| LU3_AD  | 3  | 16 | 16 | 76,684,900 | 76,717,045  | 16q23.1 | 16q23.1 |
| LU3_AD  | 3  | 16 | 16 | 76,717,045 | 76,684,900  | 16q23.1 | 16q23.1 |
| LU3_L   | 3  | 18 | 18 | 76,720,347 | 76,665,968  | 18q23   | 18q23   |
| LU4_AD  | 3  | 23 | 8  | 76,759,203 | 19,017,786  | Xq21.1  | 8p21.3  |
| LU12_L  | 10 | 1  | 1  | 76,773,698 | 88,768,168  | 1p31.1  | 1p22.2  |
| LU12_L  | 8  | 1  | 1  | 76,784,647 | 85,825,811  | 1p31.1  | 1p22.3  |
| LU12_L  | 5  | 1  | 1  | 76,785,519 | 101,104,565 | 1p31.1  | 1p21.2  |
| LU12_L  | 4  | 1  | 1  | 76,794,180 | 109,207,005 | 1p31.1  | 1p13.3  |
| LU12_L  | 6  | 1  | 1  | 76,795,076 | 76,561,520  | 1p31.1  | 1p31.1  |
| LU18_AD | 3  | 18 | 18 | 76,861,627 | 76,892,416  | 18q23   | 18q23   |
| LU12_L  | 10 | 1  | 1  | 76,879,407 | 89,224,547  | 1p31.1  | 1p22.2  |
| LU12_L  | 6  | 1  | 1  | 76,881,405 | 94,097,312  | 1p31.1  | 1p22.1  |
| LU12_L  | 3  | 1  | 1  | 76,883,951 | 73,492,243  | 1p31.1  | 1p31.1  |
| LU4_L   | 3  | 5  | 3  | 76,885,095 | 132,544,990 | 5q13.3  | 3q22.1  |
| LU18_AD | 3  | 18 | 18 | 76,892,416 | 76,861,627  | 18q23   | 18q23   |
| LU15_AD | 3  | 15 | 15 | 76,909,625 | 76,942,485  | 15q24.3 | 15q24.3 |
| LU15_AD | 3  | 15 | 15 | 76,942,485 | 76,909,625  | 15q24.3 | 15q24.3 |
| LU12_L  | 10 | 1  | 1  | 76,943,529 | 98,807,947  | 1p31.1  | 1p21.3  |
| LU3_L   | 6  | 12 | 12 | 76,954,885 | 62,828,795  | 12q21.2 | 12q14.1 |
| LU12_L  | 11 | 1  | 1  | 76,955,117 | 101,911,898 | 1p31.1  | 1p21.2  |
| LU3_AD  | 3  | 16 | 16 | 76,970,613 | 77,001,115  | 16q23.1 | 16q23.1 |
| LU12_L  | 5  | 1  | 1  | 76,989,619 | 101,076,825 | 1p31.1  | 1p21.2  |
| LU3_AD  | 3  | 16 | 16 | 77,001,115 | 76,970,613  | 16q23.1 | 16q23.1 |
| LU12_L  | 7  | 1  | 1  | 77,006,035 | 89,456,825  | 1p31.1  | 1p22.2  |
| LU12_L  | 13 | 1  | 1  | 77,133,911 | 101,345,143 | 1p31.1  | 1p21.2  |
| LU12_L  | 11 | 1  | 1  | 77,135,125 | 88,578,186  | 1p31.1  | 1p22.2  |
| LU3_L   | 16 | 12 | 12 | 77,137,487 | 79,361,479  | 12q21.2 | 12q21.2 |
| LU3_L   | 6  | 12 | 12 | 77,140,802 | 60,257,490  | 12q21.2 | 12q14.1 |
| LU3_L   | 4  | 12 | 12 | 77,151,297 | 75,561,244  | 12q21.2 | 12q21.1 |
| LU14_L  | 9  | 9  | 9  | 77,323,487 | 101,463,756 | 9q21.13 | 9q22.33 |
| LU12_L  | 6  | 1  | 1  | 77,385,607 | 76,088,510  | 1p31.1  | 1p31.1  |
| LU11_L  | 3  | 5  | 15 | 77,397,221 | 24,502,232  | 5q14.1  | 15q11.2 |
| LU12_L  | 18 | 1  | 1  | 77,405,378 | 88,188,686  | 1p31.1  | 1p22.3  |
| LU12_L  | 10 | 1  | 1  | 77,480,430 | 89,996,438  | 1p31.1  | 1p22.2  |
| LU12_L  | 5  | 1  | 1  | 77,520,744 | 93,781,064  | 1p31.1  | 1p22.1  |
| LU18_L  | 4  | 9  | 6  | 77,551,202 | 151,763,214 | 9q21.13 | 6q25.1  |
| LU21_AD | 3  | 1  | 15 | 77,594,654 | 71,633,725  | 1p31.1  | 15q23   |
| LU12_L  | 8  | 1  | 1  | 77,628,298 | 74,677,512  | 1p31.1  | 1p31.1  |
| LU12_L  | 7  | 1  | 1  | 77,644,945 | 101,321,014 | 1p31.1  | 1p21.2  |
| LU20_AD | 3  | 15 | 15 | 77,694,144 | 77,724,446  | 15q24.3 | 15q24.3 |
| LU15_L  | 3  | 13 | 13 | 77,714,662 | 77,744,308  | 13q22.3 | 13q22.3 |
| LU20_AD | 3  | 15 | 15 | 77,724,446 | 77,694,144  | 15q24.3 | 15q24.3 |
| LU15_L  | 3  | 13 | 13 | 77,744,308 | 77,714,662  | 13q22.3 | 13q22.3 |
| LU7_AD  | 3  | 18 | 5  | 77,751,586 | 35,994,435  | 18q23   | 5p13.2  |

|         |    |    |    |            |             |         |         |
|---------|----|----|----|------------|-------------|---------|---------|
| LU12_L  | 11 | 1  | 1  | 77,779,837 | 74,218,739  | 1p31.1  | 1p31.1  |
| LU12_L  | 6  | 1  | 1  | 77,799,373 | 96,863,234  | 1p31.1  | 1p21.3  |
| LU12_L  | 7  | 1  | 1  | 77,806,083 | 81,102,800  | 1p31.1  | 1p31.1  |
| LU20_AD | 4  | 10 | 10 | 77,807,666 | 77,848,400  | 10q22.3 | 10q22.3 |
| LU12_L  | 15 | 1  | 1  | 77,809,037 | 107,794,820 | 1p31.1  | 1p13.3  |
| LU4_L   | 3  | 18 | 5  | 77,816,896 | 155,213,943 | 18q23   | 5q33.2  |
| LU4_AD  | 23 | 18 | 5  | 77,817,164 | 155,213,706 | 18q23   | 5q33.2  |
| LU20_AD | 4  | 10 | 10 | 77,848,400 | 77,807,666  | 10q22.3 | 10q22.3 |
| LU12_L  | 13 | 1  | 1  | 77,871,309 | 100,947,388 | 1p31.1  | 1p21.2  |
| LU3_L   | 3  | 7  | 7  | 77,873,566 | 77,907,814  | 7q21.11 | 7q21.11 |
| LU12_L  | 4  | 1  | 1  | 77,881,253 | 78,465,408  | 1p31.1  | 1p31.1  |
| LU12_L  | 9  | 1  | 1  | 77,888,188 | 74,516,363  | 1p31.1  | 1p31.1  |
| LU12_L  | 8  | 1  | 1  | 77,888,477 | 82,523,141  | 1p31.1  | 1p31.1  |
| LU3_L   | 3  | 7  | 7  | 77,907,814 | 77,873,566  | 7q21.11 | 7q21.11 |
| LU12_L  | 5  | 1  | 1  | 78,042,079 | 89,119,378  | 1p31.1  | 1p22.2  |
| LU18_L  | 3  | 3  | 3  | 78,065,254 | 78,119,382  | 3p12.3  | 3p12.3  |
| LU12_L  | 4  | 1  | 1  | 78,102,040 | 78,773,899  | 1p31.1  | 1p31.1  |
| LU4_AD  | 4  | 9  | 9  | 78,116,968 | 78,149,145  | 9q21.13 | 9q21.13 |
| LU18_L  | 3  | 3  | 3  | 78,119,382 | 78,065,254  | 3p12.3  | 3p12.3  |
| LU12_L  | 15 | 1  | 1  | 78,124,955 | 104,810,326 | 1p31.1  | 1p21.1  |
| LU4_AD  | 4  | 9  | 9  | 78,149,145 | 78,116,968  | 9q21.13 | 9q21.13 |
| LU20_L  | 5  | 15 | 24 | 78,154,957 | 26,404,246  | 15q24.3 | Yq11.23 |
| LU21_AD | 3  | 15 | 24 | 78,154,957 | 26,404,253  | 15q24.3 | Yq11.23 |
| LU20_L  | 4  | 15 | 15 | 78,191,578 | 84,861,947  | 15q24.3 | 15q25.2 |
| LU18_L  | 3  | 15 | 15 | 78,218,939 | 62,560,964  | 15q24.3 | 15q22.2 |
| LU8_L   | 3  | 5  | 2  | 78,289,120 | 194,393,304 | 5q14.1  | 2q32.3  |
| LU20_L  | 3  | 13 | 13 | 78,296,640 | 78,329,469  | 13q22.3 | 13q22.3 |
| LU3_AD  | 3  | 14 | 14 | 78,322,075 | 78,354,112  | 14q24.3 | 14q24.3 |
| LU20_L  | 3  | 13 | 13 | 78,329,469 | 78,296,640  | 13q22.3 | 13q22.3 |
| LU3_AD  | 3  | 14 | 14 | 78,354,112 | 78,322,075  | 14q24.3 | 14q24.3 |
| LU11_AD | 3  | 5  | 2  | 78,421,769 | 208,475,786 | 5q14.1  | 2q33.3  |
| LU12_L  | 4  | 1  | 1  | 78,465,408 | 77,881,253  | 1p31.1  | 1p31.1  |
| LU12_L  | 4  | 1  | 1  | 78,471,716 | 88,604,121  | 1p31.1  | 1p22.2  |
| LU12_L  | 8  | 1  | 1  | 78,473,993 | 101,119,306 | 1p31.1  | 1p21.2  |
| LU12_L  | 6  | 1  | 1  | 78,493,070 | 89,972,490  | 1p31.1  | 1p22.2  |
| LU12_L  | 9  | 1  | 1  | 78,494,694 | 92,561,748  | 1p31.1  | 1p22.1  |
| LU12_L  | 3  | 1  | 1  | 78,497,350 | 109,296,882 | 1p31.1  | 1p13.3  |
| LU12_L  | 4  | 1  | 1  | 78,509,184 | 78,540,332  | 1p31.1  | 1p31.1  |
| LU12_L  | 4  | 1  | 1  | 78,540,332 | 78,509,184  | 1p31.1  | 1p31.1  |
| LU12_L  | 9  | 1  | 1  | 78,540,634 | 92,948,027  | 1p31.1  | 1p22.1  |
| LU7_L   | 3  | 13 | 4  | 78,542,756 | 104,148,247 | 13q22.3 | 4q24    |
| LU12_L  | 3  | 1  | 1  | 78,593,893 | 100,425,043 | 1p31.1  | 1p21.2  |
| LU12_L  | 6  | 1  | 1  | 78,594,332 | 92,784,063  | 1p31.1  | 1p22.1  |
| LU12_L  | 7  | 1  | 1  | 78,637,968 | 92,361,131  | 1p31.1  | 1p22.1  |

|         |    |    |    |            |             |         |         |
|---------|----|----|----|------------|-------------|---------|---------|
| LU12_L  | 7  | 1  | 1  | 78,688,784 | 109,145,065 | 1p31.1  | 1p13.3  |
| LU12_L  | 10 | 1  | 1  | 78,691,930 | 76,040,346  | 1p31.1  | 1p31.1  |
| LU12_L  | 4  | 1  | 1  | 78,773,899 | 78,102,040  | 1p31.1  | 1p31.1  |
| LU12_L  | 4  | 1  | 1  | 78,773,927 | 95,427,228  | 1p31.1  | 1p21.3  |
| LU12_L  | 7  | 1  | 1  | 78,825,994 | 101,936,158 | 1p31.1  | 1p21.2  |
| LU5_AD  | 3  | 12 | 12 | 78,828,825 | 78,860,108  | 12q21.2 | 12q21.2 |
| LU12_L  | 8  | 1  | 1  | 78,830,147 | 107,927,617 | 1p31.1  | 1p13.3  |
| LU5_AD  | 3  | 12 | 12 | 78,860,108 | 78,828,825  | 12q21.2 | 12q21.2 |
| LU18_AD | 8  | 11 | 8  | 78,980,721 | 19,287,152  | 11q14.1 | 8p21.3  |
| LU18_L  | 6  | 11 | 8  | 78,981,222 | 19,288,483  | 11q14.1 | 8p21.3  |
| LU12_L  | 4  | 1  | 1  | 78,981,480 | 91,169,160  | 1p31.1  | 1p22.2  |
| LU5_L   | 4  | 7  | 7  | 78,988,883 | 79,022,296  | 7q21.11 | 7q21.11 |
| LU12_L  | 9  | 1  | 1  | 78,991,419 | 105,435,382 | 1p31.1  | 1p21.1  |
| LU18_AD | 3  | 15 | 7  | 79,009,524 | 30,570,704  | 15q25.1 | 7p14.3  |
| LU12_L  | 7  | 1  | 1  | 79,019,360 | 79,388,607  | 1p31.1  | 1p31.1  |
| LU5_L   | 4  | 7  | 7  | 79,022,296 | 78,988,883  | 7q21.11 | 7q21.11 |
| LU15_L  | 4  | 15 | 15 | 79,027,205 | 75,592,053  | 15q25.1 | 15q24.2 |
| LU6_AD  | 4  | 11 | 1  | 79,041,291 | 29,236,293  | 11q14.1 | 1p35.3  |
| LU12_L  | 9  | 1  | 1  | 79,067,575 | 79,208,506  | 1p31.1  | 1p31.1  |
| LU12_L  | 5  | 1  | 1  | 79,070,650 | 106,658,761 | 1p31.1  | 1p21.1  |
| LU4_AD  | 5  | 7  | 7  | 79,101,113 | 6,869,392   | 7q21.11 | 7p22.1  |
| LU12_L  | 15 | 1  | 1  | 79,137,130 | 82,081,627  | 1p31.1  | 1p31.1  |
| LU12_L  | 17 | 1  | 1  | 79,163,016 | 106,241,251 | 1p31.1  | 1p21.1  |
| LU12_L  | 9  | 1  | 1  | 79,208,506 | 79,067,575  | 1p31.1  | 1p31.1  |
| LU4_AD  | 4  | 23 | 3  | 79,214,828 | 96,386,438  | Xq21.1  | 3q11.2  |
| LU12_L  | 5  | 1  | 1  | 79,224,864 | 109,588,301 | 1p31.1  | 1p13.3  |
| LU7_L   | 5  | 7  | 7  | 79,256,868 | 129,040,965 | 7q21.11 | 7q32.1  |
| LU6_AD  | 11 | 11 | 11 | 79,307,885 | 79,382,110  | 11q14.1 | 11q14.1 |
| LU6_AD  | 3  | 11 | 11 | 79,307,980 | 79,592,006  | 11q14.1 | 11q14.1 |
| LU3_L   | 16 | 12 | 12 | 79,361,479 | 77,137,487  | 12q21.2 | 12q21.2 |
| LU12_L  | 8  | 1  | 1  | 79,380,664 | 91,846,544  | 1p31.1  | 1p22.2  |
| LU6_AD  | 11 | 11 | 11 | 79,382,110 | 79,307,885  | 11q14.1 | 11q14.1 |
| LU12_L  | 7  | 1  | 1  | 79,388,607 | 79,019,360  | 1p31.1  | 1p31.1  |
| LU12_AD | 3  | 11 | 11 | 79,410,492 | 79,454,497  | 11q14.1 | 11q14.1 |
| LU12_L  | 15 | 1  | 1  | 79,420,314 | 83,012,677  | 1p31.1  | 1p31.1  |
| LU12_L  | 10 | 1  | 1  | 79,449,074 | 104,486,255 | 1p31.1  | 1p21.1  |
| LU12_AD | 3  | 11 | 11 | 79,454,497 | 79,410,492  | 11q14.1 | 11q14.1 |
| LU18_AD | 3  | 23 | 23 | 79,570,979 | 111,102,966 | Xq21.1  | Xq23    |
| LU12_L  | 14 | 1  | 1  | 79,580,675 | 102,076,509 | 1p31.1  | 1p21.2  |
| LU12_L  | 8  | 1  | 1  | 79,589,137 | 82,064,390  | 1p31.1  | 1p31.1  |
| LU12_L  | 20 | 1  | 1  | 79,591,967 | 98,963,268  | 1p31.1  | 1p21.3  |
| LU6_AD  | 3  | 11 | 11 | 79,592,006 | 79,307,980  | 11q14.1 | 11q14.1 |
| LU12_L  | 6  | 1  | 1  | 79,667,372 | 86,575,140  | 1p31.1  | 1p22.3  |
| LU12_L  | 13 | 1  | 1  | 79,691,456 | 107,825,228 | 1p31.1  | 1p13.3  |

|         |    |    |    |            |             |          |         |
|---------|----|----|----|------------|-------------|----------|---------|
| LU12_L  | 5  | 1  | 1  | 79,703,160 | 73,354,360  | 1p31.1   | 1p31.1  |
| LU12_L  | 18 | 1  | 1  | 79,740,820 | 92,248,262  | 1p31.1   | 1p22.1  |
| LU12_L  | 11 | 1  | 1  | 79,746,172 | 91,006,857  | 1p31.1   | 1p22.2  |
| LU12_L  | 11 | 1  | 1  | 79,758,515 | 88,945,097  | 1p31.1   | 1p22.2  |
| LU12_L  | 6  | 1  | 1  | 79,776,731 | 107,303,133 | 1p31.1   | 1p13.3  |
| LU12_L  | 9  | 1  | 1  | 79,807,611 | 96,788,450  | 1p31.1   | 1p21.3  |
| LU21_AD | 3  | 3  | 18 | 79,825,860 | 53,619,012  | 3p12.2   | 18q21.2 |
| LU20_AD | 4  | 3  | 19 | 79,826,839 | 9,837,654   | 3p12.2   | 19p13.2 |
| LU12_L  | 4  | 1  | 1  | 79,864,084 | 105,066,399 | 1p31.1   | 1p21.1  |
| LU12_L  | 11 | 1  | 1  | 79,864,247 | 94,533,360  | 1p31.1   | 1p22.1  |
| LU12_L  | 7  | 1  | 1  | 79,864,700 | 91,628,562  | 1p31.1   | 1p22.2  |
| LU14_AD | 3  | 12 | 6  | 79,865,363 | 58,586,140  | 12q21.2  | 6p11.2  |
| LU8_AD  | 3  | 12 | 6  | 79,869,218 | 58,582,345  | 12q21.2  | 6p11.2  |
| LU21_AD | 3  | 12 | 3  | 79,872,963 | 8,739,278   | 12q21.2  | 3p25.3  |
| LU3_L   | 3  | 4  | 4  | 79,881,483 | 79,919,277  | 4q21.21  | 4q21.21 |
| LU3_L   | 3  | 4  | 4  | 79,919,277 | 79,881,483  | 4q21.21  | 4q21.21 |
| LU7_AD  | 3  | 5  | 6  | 79,924,384 | 31,328,983  | 5q14.1   | 6p21.33 |
| LU15_AD | 3  | 11 | 11 | 79,949,813 | 79,987,066  | 11q14.1  | 11q14.1 |
| LU12_L  | 5  | 1  | 1  | 79,952,298 | 109,863,977 | 1p31.1   | 1p13.3  |
| LU12_L  | 10 | 1  | 1  | 79,966,750 | 80,382,916  | 1p31.1   | 1p31.1  |
| LU15_AD | 3  | 11 | 11 | 79,987,066 | 79,949,813  | 11q14.1  | 11q14.1 |
| LU15_AD | 3  | 1  | 4  | 79,987,746 | 99,995,054  | 1p31.1   | 4q23    |
| LU12_L  | 18 | 1  | 1  | 80,049,315 | 109,803,850 | 1p31.1   | 1p13.3  |
| LU20_L  | 3  | 2  | 2  | 80,168,459 | 80,219,695  | 2p12     | 2p12    |
| LU3_AD  | 5  | 13 | 13 | 80,173,781 | 80,203,525  | 13q31.1  | 13q31.1 |
| LU3_AD  | 5  | 13 | 13 | 80,203,525 | 80,173,781  | 13q31.1  | 13q31.1 |
| LU20_L  | 3  | 2  | 2  | 80,219,695 | 80,168,459  | 2p12     | 2p12    |
| LU18_L  | 4  | 6  | 7  | 80,235,406 | 21,590,554  | 6q14.1   | 7p15.3  |
| LU12_L  | 11 | 1  | 1  | 80,249,384 | 107,786,062 | 1p31.1   | 1p13.3  |
| LU4_AD  | 3  | 13 | 13 | 80,268,756 | 80,302,684  | 13q31.1  | 13q31.1 |
| LU4_AD  | 3  | 13 | 13 | 80,302,684 | 80,268,756  | 13q31.1  | 13q31.1 |
| LU12_L  | 6  | 1  | 1  | 80,343,771 | 85,940,890  | 1p31.1   | 1p22.3  |
| LU12_L  | 10 | 1  | 1  | 80,382,916 | 79,966,750  | 1p31.1   | 1p31.1  |
| LU12_L  | 9  | 1  | 1  | 80,424,241 | 99,912,129  | 1p31.1   | 1p21.2  |
| LU3_L   | 5  | 12 | 12 | 80,431,192 | 58,302,137  | 12q21.31 | 12q14.1 |
| LU12_L  | 10 | 1  | 1  | 80,433,247 | 102,850,184 | 1p31.1   | 1p21.1  |
| LU20_L  | 3  | 14 | 14 | 80,511,626 | 80,547,052  | 14q31.1  | 14q31.1 |
| LU12_L  | 10 | 1  | 1  | 80,514,474 | 74,323,355  | 1p31.1   | 1p31.1  |
| LU12_L  | 7  | 1  | 1  | 80,531,305 | 73,330,785  | 1p31.1   | 1p31.1  |
| LU12_L  | 5  | 1  | 1  | 80,533,477 | 87,404,063  | 1p31.1   | 1p22.3  |
| LU12_L  | 6  | 1  | 1  | 80,537,825 | 87,459,026  | 1p31.1   | 1p22.3  |
| LU20_L  | 3  | 14 | 14 | 80,547,052 | 80,511,626  | 14q31.1  | 14q31.1 |
| LU3_L   | 3  | 14 | 14 | 80,655,915 | 80,685,576  | 14q31.1  | 14q31.1 |
| LU8_L   | 3  | 4  | 4  | 80,672,786 | 80,764,447  | 4q21.21  | 4q21.21 |

|         |    |    |    |            |             |          |         |
|---------|----|----|----|------------|-------------|----------|---------|
| LU3_L   | 3  | 14 | 14 | 80,685,576 | 80,655,915  | 14q31.1  | 14q31.1 |
| LU3_L   | 15 | 12 | 12 | 80,686,253 | 20,081,482  | 12q21.31 | 12p12.2 |
| LU12_L  | 10 | 1  | 1  | 80,702,345 | 87,730,896  | 1p31.1   | 1p22.3  |
| LU12_L  | 7  | 1  | 1  | 80,704,166 | 74,269,615  | 1p31.1   | 1p31.1  |
| LU12_L  | 31 | 1  | 1  | 80,719,845 | 90,959,859  | 1p31.1   | 1p22.2  |
| LU12_L  | 6  | 1  | 1  | 80,735,643 | 85,362,775  | 1p31.1   | 1p22.3  |
| LU12_L  | 9  | 1  | 1  | 80,751,514 | 81,932,134  | 1p31.1   | 1p31.1  |
| LU8_L   | 3  | 4  | 4  | 80,764,447 | 80,672,786  | 4q21.21  | 4q21.21 |
| LU12_L  | 3  | 9  | 9  | 80,795,932 | 125,299,079 | 9q21.2   | 9q33.2  |
| LU12_L  | 11 | 1  | 1  | 80,811,971 | 92,240,848  | 1p31.1   | 1p22.1  |
| LU3_AD  | 3  | 11 | 11 | 80,830,564 | 80,878,689  | 11q14.1  | 11q14.1 |
| LU3_AD  | 3  | 6  | 6  | 80,873,506 | 80,904,600  | 6q14.1   | 6q14.1  |
| LU3_AD  | 3  | 11 | 11 | 80,878,689 | 80,830,564  | 11q14.1  | 11q14.1 |
| LU4_AD  | 4  | 8  | 8  | 80,900,684 | 80,931,512  | 8q21.13  | 8q21.13 |
| LU21_AD | 4  | 4  | 4  | 80,902,546 | 80,934,673  | 4q21.21  | 4q21.21 |
| LU3_AD  | 3  | 6  | 6  | 80,904,600 | 80,873,506  | 6q14.1   | 6q14.1  |
| LU4_AD  | 3  | 11 | 11 | 80,909,977 | 80,943,434  | 11q14.1  | 11q14.1 |
| LU4_AD  | 4  | 8  | 8  | 80,931,512 | 80,900,684  | 8q21.13  | 8q21.13 |
| LU21_AD | 4  | 4  | 4  | 80,934,673 | 80,902,546  | 4q21.21  | 4q21.21 |
| LU12_L  | 8  | 1  | 1  | 80,943,321 | 103,684,314 | 1p31.1   | 1p21.1  |
| LU4_AD  | 3  | 11 | 11 | 80,943,434 | 80,909,977  | 11q14.1  | 11q14.1 |
| LU12_L  | 9  | 1  | 1  | 80,951,507 | 97,309,756  | 1p31.1   | 1p21.3  |
| LU12_L  | 6  | 1  | 1  | 80,956,046 | 102,057,203 | 1p31.1   | 1p21.2  |
| LU12_L  | 4  | 1  | 1  | 80,959,009 | 102,803,793 | 1p31.1   | 1p21.1  |
| LU12_L  | 9  | 1  | 1  | 81,062,208 | 103,684,123 | 1p31.1   | 1p21.1  |
| LU12_L  | 10 | 1  | 1  | 81,068,929 | 84,878,801  | 1p31.1   | 1p31.1  |
| LU12_L  | 6  | 1  | 1  | 81,083,673 | 74,513,330  | 1p31.1   | 1p31.1  |
| LU12_L  | 7  | 1  | 1  | 81,102,800 | 77,806,083  | 1p31.1   | 1p31.1  |
| LU12_L  | 14 | 1  | 1  | 81,227,403 | 102,107,864 | 1p31.1   | 1p21.2  |
| LU12_L  | 10 | 1  | 1  | 81,228,497 | 96,967,334  | 1p31.1   | 1p21.3  |
| LU12_L  | 13 | 1  | 1  | 81,243,595 | 89,101,227  | 1p31.1   | 1p22.2  |
| LU12_L  | 9  | 1  | 1  | 81,243,715 | 107,486,532 | 1p31.1   | 1p13.3  |
| LU12_L  | 5  | 1  | 1  | 81,255,086 | 89,994,133  | 1p31.1   | 1p22.2  |
| LU12_L  | 9  | 1  | 1  | 81,258,296 | 87,595,592  | 1p31.1   | 1p22.3  |
| LU12_L  | 8  | 1  | 1  | 81,266,551 | 86,610,441  | 1p31.1   | 1p22.3  |
| LU12_L  | 6  | 1  | 1  | 81,271,229 | 94,412,091  | 1p31.1   | 1p22.1  |
| LU12_L  | 10 | 1  | 1  | 81,301,404 | 106,502,128 | 1p31.1   | 1p21.1  |
| LU4_L   | 6  | 2  | 2  | 81,308,930 | 81,340,273  | 2p12     | 2p12    |
| LU4_L   | 6  | 2  | 2  | 81,340,273 | 81,308,930  | 2p12     | 2p12    |
| LU3_L   | 5  | 4  | 4  | 81,340,812 | 81,372,329  | 4q21.21  | 4q21.21 |
| LU8_L   | 3  | 14 | 14 | 81,348,743 | 81,381,823  | 14q31.1  | 14q31.1 |
| LU12_AD | 5  | 6  | 4  | 81,362,758 | 168,797,286 | 6q14.1   | 4q32.3  |
| LU3_L   | 5  | 4  | 4  | 81,372,329 | 81,340,812  | 4q21.21  | 4q21.21 |
| LU18_L  | 4  | 16 | 8  | 81,373,846 | 68,270,440  | 16q23.2  | 8q13.2  |

|         |    |    |    |            |             |          |          |
|---------|----|----|----|------------|-------------|----------|----------|
| LU8_L   | 3  | 14 | 14 | 81,381,823 | 81,348,743  | 14q31.1  | 14q31.1  |
| LU12_AD | 3  | 11 | 11 | 81,407,103 | 57,638,832  | 11q14.1  | 11q12.1  |
| LU20_L  | 3  | 10 | 10 | 81,454,773 | 46,961,257  | 10q22.3  | 10q11.22 |
| LU16_AD | 36 | 12 | 12 | 81,496,923 | 64,458,975  | 12q21.31 | 12q14.2  |
| LU16_L  | 4  | 12 | 12 | 81,499,617 | 64,458,615  | 12q21.31 | 12q14.2  |
| LU4_AD  | 3  | 8  | 11 | 81,507,140 | 18,231,629  | 8q21.13  | 11p15.1  |
| LU16_AD | 15 | 12 | 12 | 81,527,118 | 64,641,684  | 12q21.31 | 12q14.2  |
| LU4_L   | 3  | 10 | 10 | 81,556,644 | 52,416,182  | 10q22.3  | 10q11.23 |
| LU12_L  | 6  | 1  | 1  | 81,561,768 | 103,113,212 | 1p31.1   | 1p21.1   |
| LU5_AD  | 3  | 5  | 5  | 81,621,307 | 81,661,629  | 5q14.2   | 5q14.2   |
| LU12_L  | 9  | 1  | 1  | 81,649,055 | 107,932,861 | 1p31.1   | 1p13.3   |
| LU16_AD | 3  | 8  | 4  | 81,649,805 | 42,289,151  | 8q21.13  | 4p13     |
| LU5_AD  | 3  | 5  | 5  | 81,661,629 | 81,621,307  | 5q14.2   | 5q14.2   |
| LU18_AD | 3  | 4  | 4  | 81,688,834 | 81,722,683  | 4q21.21  | 4q21.21  |
| LU18_AD | 3  | 4  | 4  | 81,722,683 | 81,688,834  | 4q21.21  | 4q21.21  |
| LU12_L  | 3  | 1  | 1  | 81,738,397 | 103,020,556 | 1p31.1   | 1p21.1   |
| LU12_L  | 15 | 1  | 1  | 81,742,408 | 104,632,073 | 1p31.1   | 1p21.1   |
| LU12_L  | 8  | 1  | 1  | 81,754,771 | 107,523,885 | 1p31.1   | 1p13.3   |
| LU12_L  | 5  | 1  | 1  | 81,771,775 | 83,292,146  | 1p31.1   | 1p31.1   |
| LU12_L  | 8  | 1  | 1  | 81,773,073 | 101,373,562 | 1p31.1   | 1p21.2   |
| LU12_L  | 3  | 1  | 1  | 81,809,485 | 82,523,932  | 1p31.1   | 1p31.1   |
| LU7_AD  | 3  | 8  | 8  | 81,821,624 | 75,763,449  | 8q21.13  | 8q21.11  |
| LU7_L   | 4  | 8  | 8  | 81,822,506 | 75,764,173  | 8q21.13  | 8q21.11  |
| LU12_L  | 3  | 7  | 6  | 81,832,786 | 67,190,135  | 7q21.11  | 6q12     |
| LU18_AD | 6  | 7  | 7  | 81,874,422 | 125,863,978 | 7q21.11  | 7q31.33  |
| LU18_L  | 7  | 7  | 7  | 81,874,811 | 125,862,679 | 7q21.11  | 7q31.33  |
| LU12_L  | 6  | 1  | 1  | 81,905,557 | 85,974,772  | 1p31.1   | 1p22.3   |
| LU12_L  | 9  | 1  | 1  | 81,932,134 | 80,751,514  | 1p31.1   | 1p31.1   |
| LU12_L  | 8  | 1  | 1  | 82,058,976 | 85,514,208  | 1p31.1   | 1p22.3   |
| LU12_L  | 8  | 1  | 1  | 82,064,390 | 79,589,137  | 1p31.1   | 1p31.1   |
| LU12_L  | 4  | 1  | 1  | 82,065,382 | 93,576,738  | 1p31.1   | 1p22.1   |
| LU12_L  | 8  | 1  | 1  | 82,070,839 | 85,006,935  | 1p31.1   | 1p22.3   |
| LU4_L   | 3  | 3  | 3  | 82,081,221 | 82,113,000  | 3p12.2   | 3p12.2   |
| LU12_L  | 15 | 1  | 1  | 82,081,627 | 79,137,130  | 1p31.1   | 1p31.1   |
| LU4_L   | 3  | 3  | 3  | 82,113,000 | 82,081,221  | 3p12.2   | 3p12.2   |
| LU12_L  | 7  | 1  | 1  | 82,128,745 | 93,488,994  | 1p31.1   | 1p22.1   |
| LU12_L  | 6  | 1  | 1  | 82,140,162 | 102,203,596 | 1p31.1   | 1p21.1   |
| LU12_L  | 11 | 1  | 1  | 82,143,441 | 101,324,334 | 1p31.1   | 1p21.2   |
| LU12_L  | 8  | 1  | 1  | 82,165,879 | 85,088,972  | 1p31.1   | 1p22.3   |
| LU18_L  | 4  | 4  | 8  | 82,178,454 | 114,025,858 | 4q21.21  | 8q23.3   |
| LU12_L  | 7  | 1  | 1  | 82,240,320 | 83,727,829  | 1p31.1   | 1p31.1   |
| LU4_AD  | 3  | 7  | 23 | 82,264,352 | 115,375,840 | 7q21.11  | Xq23     |
| LU21_AD | 3  | 5  | 7  | 82,264,659 | 132,855,259 | 5q14.2   | 7q33     |
| LU12_L  | 9  | 1  | 1  | 82,265,679 | 83,530,179  | 1p31.1   | 1p31.1   |



|         |    |    |    |            |             |          |         |
|---------|----|----|----|------------|-------------|----------|---------|
| LU12_L  | 3  | 1  | 1  | 82,269,393 | 83,365,337  | 1p31.1   | 1p31.1  |
| LU11_AD | 4  | 7  | 5  | 82,274,949 | 125,557,443 | 7q21.11  | 5q23.2  |
| LU12_AD | 6  | 11 | 15 | 82,278,763 | 72,507,445  | 11q14.1  | 15q23   |
| LU12_L  | 8  | 1  | 1  | 82,284,799 | 83,442,959  | 1p31.1   | 1p31.1  |
| LU18_AD | 3  | 8  | 8  | 82,288,981 | 82,338,674  | 8q21.13  | 8q21.13 |
| LU16_AD | 3  | 12 | 12 | 82,295,187 | 95,844,159  | 12q21.31 | 12q22   |
| LU12_L  | 6  | 1  | 1  | 82,337,202 | 96,527,183  | 1p31.1   | 1p21.3  |
| LU21_L  | 3  | 11 | 8  | 82,338,659 | 27,351,219  | 11q14.1  | 8p21.2  |
| LU18_AD | 3  | 8  | 8  | 82,338,674 | 82,288,981  | 8q21.13  | 8q21.13 |
| LU12_L  | 11 | 1  | 1  | 82,339,315 | 87,648,153  | 1p31.1   | 1p22.3  |
| LU12_L  | 5  | 1  | 1  | 82,339,929 | 107,557,437 | 1p31.1   | 1p13.3  |
| LU3_AD  | 7  | 8  | 8  | 82,370,615 | 86,554,884  | 8q21.13  | 8q21.2  |
| LU12_L  | 3  | 1  | 1  | 82,381,765 | 92,662,643  | 1p31.1   | 1p22.1  |
| LU20_AD | 3  | 10 | 10 | 82,384,848 | 82,415,414  | 10q23.1  | 10q23.1 |
| LU12_L  | 7  | 1  | 1  | 82,393,596 | 86,184,874  | 1p31.1   | 1p22.3  |
| LU20_AD | 3  | 10 | 10 | 82,415,414 | 82,384,848  | 10q23.1  | 10q23.1 |
| LU18_AD | 5  | 10 | 10 | 82,417,364 | 82,453,528  | 10q23.1  | 10q23.1 |
| LU12_L  | 6  | 1  | 1  | 82,427,145 | 73,295,143  | 1p31.1   | 1p31.1  |
| LU12_L  | 7  | 1  | 1  | 82,432,110 | 86,876,268  | 1p31.1   | 1p22.3  |
| LU12_L  | 5  | 1  | 1  | 82,434,803 | 86,832,670  | 1p31.1   | 1p22.3  |
| LU18_AD | 5  | 10 | 10 | 82,453,528 | 82,417,364  | 10q23.1  | 10q23.1 |
| LU21_L  | 3  | 6  | 6  | 82,456,832 | 82,494,469  | 6q14.1   | 6q14.1  |
| LU3_L   | 6  | 5  | 5  | 82,474,606 | 82,505,892  | 5q14.2   | 5q14.2  |
| LU21_L  | 3  | 6  | 6  | 82,494,469 | 82,456,832  | 6q14.1   | 6q14.1  |
| LU3_L   | 6  | 5  | 5  | 82,505,892 | 82,474,606  | 5q14.2   | 5q14.2  |
| LU12_L  | 8  | 1  | 1  | 82,523,141 | 77,888,477  | 1p31.1   | 1p31.1  |
| LU12_L  | 3  | 1  | 1  | 82,523,932 | 81,809,485  | 1p31.1   | 1p31.1  |
| LU7_L   | 3  | 1  | 4  | 82,538,617 | 24,505,368  | 1p31.1   | 4p15.2  |
| LU12_L  | 8  | 1  | 1  | 82,540,982 | 85,632,961  | 1p31.1   | 1p22.3  |
| LU12_L  | 5  | 1  | 1  | 82,544,999 | 88,250,582  | 1p31.1   | 1p22.3  |
| LU12_L  | 4  | 1  | 1  | 82,545,627 | 88,078,128  | 1p31.1   | 1p22.3  |
| LU12_L  | 5  | 1  | 1  | 82,547,815 | 96,072,363  | 1p31.1   | 1p21.3  |
| LU4_AD  | 9  | 10 | 1  | 82,633,841 | 209,884,150 | 10q23.1  | 1q32.2  |
| LU12_L  | 10 | 1  | 1  | 82,705,450 | 85,310,425  | 1p31.1   | 1p22.3  |
| LU12_L  | 6  | 1  | 1  | 82,708,957 | 83,974,647  | 1p31.1   | 1p31.1  |
| LU15_L  | 4  | 3  | 3  | 82,710,337 | 82,967,796  | 3p12.2   | 3p12.2  |
| LU12_L  | 7  | 1  | 1  | 82,711,836 | 86,184,593  | 1p31.1   | 1p22.3  |
| LU8_L   | 3  | 15 | 15 | 82,742,974 | 102,280,323 | 15q25.2  | 15q26.3 |
| LU12_L  | 6  | 1  | 1  | 82,761,480 | 86,672,133  | 1p31.1   | 1p22.3  |
| LU12_L  | 7  | 1  | 1  | 82,836,857 | 102,714,285 | 1p31.1   | 1p21.1  |
| LU12_L  | 3  | 1  | 1  | 82,853,784 | 99,398,405  | 1p31.1   | 1p21.3  |
| LU20_AD | 3  | 2  | 2  | 82,935,820 | 82,981,146  | 2p12     | 2p12    |
| LU15_L  | 4  | 3  | 3  | 82,967,796 | 82,710,337  | 3p12.2   | 3p12.2  |
| LU20_AD | 3  | 2  | 2  | 82,981,146 | 82,935,820  | 2p12     | 2p12    |

|         |    |    |    |            |             |          |          |
|---------|----|----|----|------------|-------------|----------|----------|
| LU18_AD | 4  | 23 | 8  | 83,003,971 | 73,957,654  | Xq21.1   | 8q21.11  |
| LU11_AD | 3  | 15 | 15 | 83,006,131 | 85,795,029  | 15q25.2  | 15q25.3  |
| LU12_L  | 15 | 1  | 1  | 83,012,677 | 79,420,314  | 1p31.1   | 1p31.1   |
| LU12_L  | 6  | 1  | 1  | 83,050,494 | 86,080,988  | 1p31.1   | 1p22.3   |
| LU12_L  | 5  | 1  | 1  | 83,052,625 | 97,937,235  | 1p31.1   | 1p21.3   |
| LU12_L  | 9  | 1  | 1  | 83,053,372 | 100,532,502 | 1p31.1   | 1p21.2   |
| LU12_L  | 13 | 1  | 1  | 83,065,448 | 85,966,313  | 1p31.1   | 1p22.3   |
| LU5_L   | 3  | 2  | 6  | 83,087,021 | 31,331,247  | 2p12     | 6p21.33  |
| LU11_AD | 3  | 2  | 6  | 83,088,198 | 31,331,370  | 2p12     | 6p21.33  |
| LU18_AD | 4  | 11 | 19 | 83,131,151 | 35,005,857  | 11q14.1  | 19q13.11 |
| LU21_AD | 3  | 11 | 15 | 83,142,483 | 87,588,710  | 11q14.1  | 15q25.3  |
| LU12_L  | 17 | 1  | 1  | 83,183,411 | 107,966,675 | 1p31.1   | 1p13.3   |
| LU18_L  | 4  | 8  | 11 | 83,282,360 | 43,169,494  | 8q21.13  | 11p12    |
| LU12_L  | 5  | 1  | 1  | 83,292,146 | 81,771,775  | 1p31.1   | 1p31.1   |
| LU12_L  | 6  | 1  | 1  | 83,293,051 | 85,047,954  | 1p31.1   | 1p22.3   |
| LU12_L  | 13 | 1  | 1  | 83,297,365 | 74,292,500  | 1p31.1   | 1p31.1   |
| LU12_L  | 7  | 1  | 1  | 83,303,536 | 96,754,665  | 1p31.1   | 1p21.3   |
| LU12_L  | 4  | 1  | 1  | 83,304,450 | 95,396,579  | 1p31.1   | 1p21.3   |
| LU4_L   | 3  | 12 | 12 | 83,308,061 | 83,339,443  | 12q21.31 | 12q21.31 |
| LU4_L   | 3  | 12 | 12 | 83,339,443 | 83,308,061  | 12q21.31 | 12q21.31 |
| LU12_L  | 6  | 1  | 1  | 83,348,041 | 106,034,413 | 1p31.1   | 1p21.1   |
| LU11_AD | 26 | 12 | 18 | 83,356,733 | 36,578,560  | 12q21.31 | 18q12.2  |
| LU12_L  | 3  | 1  | 1  | 83,365,337 | 82,269,393  | 1p31.1   | 1p31.1   |
| LU12_L  | 4  | 1  | 1  | 83,378,519 | 74,564,523  | 1p31.1   | 1p31.1   |
| LU12_L  | 5  | 1  | 1  | 83,418,395 | 91,344,151  | 1p31.1   | 1p22.2   |
| LU18_AD | 4  | 1  | 1  | 83,421,971 | 48,680,912  | 1p31.1   | 1p33     |
| LU3_L   | 3  | 6  | 6  | 83,424,431 | 45,240,043  | 6q14.1   | 6p21.1   |
| LU12_L  | 7  | 1  | 1  | 83,429,097 | 84,592,902  | 1p31.1   | 1p31.1   |
| LU12_L  | 10 | 1  | 1  | 83,432,433 | 83,617,821  | 1p31.1   | 1p31.1   |
| LU12_L  | 5  | 1  | 7  | 83,435,575 | 76,211,767  | 1p31.1   | 7q11.23  |
| LU12_L  | 9  | 1  | 1  | 83,440,557 | 109,539,020 | 1p31.1   | 1p13.3   |
| LU12_L  | 8  | 1  | 1  | 83,442,959 | 82,284,799  | 1p31.1   | 1p31.1   |
| LU3_L   | 4  | 9  | 24 | 83,465,388 | 13,282,103  | 9q21.31  | Yq11.1   |
| LU11_AD | 4  | 10 | 10 | 83,490,345 | 85,192,686  | 10q23.1  | 10q23.1  |
| LU16_L  | 3  | 12 | 12 | 83,503,265 | 83,553,836  | 12q21.31 | 12q21.31 |
| LU12_L  | 16 | 1  | 1  | 83,513,805 | 87,621,858  | 1p31.1   | 1p22.3   |
| LU12_L  | 9  | 1  | 1  | 83,530,179 | 82,265,679  | 1p31.1   | 1p31.1   |
| LU16_L  | 3  | 12 | 12 | 83,553,836 | 83,503,265  | 12q21.31 | 12q21.31 |
| LU12_L  | 8  | 1  | 1  | 83,575,486 | 106,431,059 | 1p31.1   | 1p21.1   |
| LU12_L  | 10 | 1  | 1  | 83,617,821 | 83,432,433  | 1p31.1   | 1p31.1   |
| LU12_L  | 5  | 1  | 1  | 83,651,949 | 86,400,023  | 1p31.1   | 1p22.3   |
| LU3_L   | 4  | 4  | 4  | 83,667,088 | 83,698,938  | 4q21.22  | 4q21.22  |
| LU3_L   | 4  | 4  | 4  | 83,698,938 | 83,667,088  | 4q21.22  | 4q21.22  |
| LU12_L  | 7  | 1  | 1  | 83,727,829 | 82,240,320  | 1p31.1   | 1p31.1   |

|         |    |    |    |            |             |          |          |
|---------|----|----|----|------------|-------------|----------|----------|
| LU3_L   | 3  | 14 | 14 | 83,750,885 | 83,782,868  | 14q31.2  | 14q31.2  |
| LU12_L  | 5  | 1  | 1  | 83,758,437 | 106,075,499 | 1p31.1   | 1p21.1   |
| LU12_L  | 11 | 1  | 1  | 83,779,770 | 84,630,267  | 1p31.1   | 1p31.1   |
| LU3_L   | 3  | 14 | 14 | 83,782,868 | 83,750,885  | 14q31.2  | 14q31.2  |
| LU11_AD | 65 | 12 | 12 | 83,819,457 | 69,650,106  | 12q21.31 | 12q15    |
| LU11_AD | 58 | 12 | 12 | 83,847,644 | 69,743,786  | 12q21.31 | 12q15    |
| LU11_AD | 7  | 12 | 7  | 83,847,797 | 35,147,438  | 12q21.31 | 7p14.2   |
| LU11_AD | 5  | 12 | 7  | 83,847,840 | 102,841,814 | 12q21.31 | 7q22.1   |
| LU11_AD | 23 | 12 | 12 | 83,848,726 | 63,977,662  | 12q21.31 | 12q14.2  |
| LU11_L  | 5  | 12 | 12 | 83,853,840 | 69,743,342  | 12q21.31 | 12q15    |
| LU12_L  | 11 | 1  | 1  | 83,865,613 | 109,728,562 | 1p31.1   | 1p13.3   |
| LU18_AD | 3  | 1  | 1  | 83,866,333 | 83,902,100  | 1p31.1   | 1p31.1   |
| LU20_AD | 4  | 9  | 9  | 83,901,514 | 83,971,064  | 9q21.31  | 9q21.31  |
| LU18_AD | 3  | 1  | 1  | 83,902,100 | 83,866,333  | 1p31.1   | 1p31.1   |
| LU12_L  | 9  | 1  | 1  | 83,962,954 | 102,238,047 | 1p31.1   | 1p21.1   |
| LU14_L  | 3  | 15 | 15 | 83,969,022 | 84,002,774  | 15q25.2  | 15q25.2  |
| LU20_AD | 4  | 9  | 9  | 83,971,064 | 83,901,514  | 9q21.31  | 9q21.31  |
| LU12_L  | 6  | 1  | 1  | 83,974,647 | 82,708,957  | 1p31.1   | 1p31.1   |
| LU14_L  | 3  | 15 | 15 | 84,002,774 | 83,969,022  | 15q25.2  | 15q25.2  |
| LU3_L   | 3  | 1  | 1  | 84,003,764 | 84,042,088  | 1p31.1   | 1p31.1   |
| LU12_L  | 4  | 1  | 1  | 84,014,118 | 84,614,463  | 1p31.1   | 1p31.1   |
| LU12_L  | 15 | 1  | 1  | 84,020,197 | 100,672,161 | 1p31.1   | 1p21.2   |
| LU12_L  | 6  | 1  | 1  | 84,022,280 | 105,656,494 | 1p31.1   | 1p21.1   |
| LU12_L  | 21 | 1  | 1  | 84,029,131 | 106,370,331 | 1p31.1   | 1p21.1   |
| LU12_L  | 3  | 1  | 1  | 84,035,571 | 84,068,417  | 1p31.1   | 1p31.1   |
| LU12_L  | 6  | 1  | 1  | 84,037,068 | 97,592,137  | 1p31.1   | 1p21.3   |
| LU12_L  | 13 | 1  | 1  | 84,037,861 | 109,201,996 | 1p31.1   | 1p13.3   |
| LU3_L   | 3  | 1  | 1  | 84,042,088 | 84,003,764  | 1p31.1   | 1p31.1   |
| LU12_L  | 3  | 1  | 1  | 84,068,417 | 84,035,571  | 1p31.1   | 1p31.1   |
| LU12_L  | 3  | 6  | 5  | 84,069,994 | 127,010,127 | 6q14.2   | 5q23.2   |
| LU4_AD  | 5  | 6  | 18 | 84,155,026 | 4,683,590   | 6q14.2   | 18p11.31 |
| LU12_L  | 8  | 1  | 1  | 84,253,030 | 101,177,916 | 1p31.1   | 1p21.2   |
| LU12_L  | 14 | 1  | 1  | 84,283,561 | 84,331,625  | 1p31.1   | 1p31.1   |
| LU4_AD  | 11 | 23 | 23 | 84,318,217 | 88,348,422  | Xq21.1   | Xq21.31  |
| LU12_L  | 14 | 1  | 1  | 84,331,625 | 84,283,561  | 1p31.1   | 1p31.1   |
| LU12_L  | 5  | 1  | 1  | 84,351,930 | 92,152,285  | 1p31.1   | 1p22.1   |
| LU4_AD  | 7  | 23 | 5  | 84,386,059 | 173,027,818 | Xq21.1   | 5q35.2   |
| LU4_AD  | 10 | 23 | 7  | 84,393,892 | 2,209,919   | Xq21.1   | 7p22.3   |
| LU16_AD | 9  | 12 | 14 | 84,394,527 | 31,560,286  | 12q21.31 | 14q12    |
| LU12_L  | 5  | 1  | 1  | 84,423,460 | 84,894,691  | 1p31.1   | 1p31.1   |
| LU3_L   | 5  | 8  | 8  | 84,451,265 | 84,480,977  | 8q21.13  | 8q21.13  |
| LU3_L   | 4  | 6  | 2  | 84,458,690 | 23,954,314  | 6q14.2   | 2p24.1   |
| LU3_L   | 5  | 8  | 8  | 84,480,977 | 84,451,265  | 8q21.13  | 8q21.13  |
| LU12_L  | 10 | 1  | 1  | 84,586,483 | 97,572,973  | 1p31.1   | 1p21.3   |

|         |    |    |    |            |             |          |         |
|---------|----|----|----|------------|-------------|----------|---------|
| LU11_AD | 3  | 10 | 10 | 84,592,212 | 84,622,380  | 10q23.1  | 10q23.1 |
| LU12_L  | 7  | 1  | 1  | 84,592,902 | 83,429,097  | 1p31.1   | 1p31.1  |
| LU12_L  | 10 | 1  | 1  | 84,599,821 | 85,114,909  | 1p31.1   | 1p22.3  |
| LU12_L  | 4  | 1  | 1  | 84,614,463 | 84,014,118  | 1p31.1   | 1p31.1  |
| LU11_AD | 3  | 10 | 10 | 84,622,380 | 84,592,212  | 10q23.1  | 10q23.1 |
| LU12_L  | 11 | 1  | 1  | 84,630,267 | 83,779,770  | 1p31.1   | 1p31.1  |
| LU3_AD  | 3  | 11 | 11 | 84,632,093 | 84,668,826  | 11q14.1  | 11q14.1 |
| LU12_L  | 6  | 1  | 1  | 84,642,678 | 74,222,049  | 1p31.1   | 1p31.1  |
| LU12_L  | 3  | 1  | 1  | 84,647,131 | 106,256,498 | 1p31.1   | 1p21.1  |
| LU3_AD  | 3  | 11 | 11 | 84,668,826 | 84,632,093  | 11q14.1  | 11q14.1 |
| LU3_L   | 4  | 2  | 4  | 84,694,611 | 88,324,874  | 2p11.2   | 4q22.1  |
| LU21_AD | 3  | 2  | 2  | 84,702,441 | 150,179,395 | 2p11.2   | 2q23.2  |
| LU5_AD  | 3  | 4  | 4  | 84,776,371 | 84,808,426  | 4q21.23  | 4q21.23 |
| LU5_AD  | 3  | 4  | 4  | 84,808,426 | 84,776,371  | 4q21.23  | 4q21.23 |
| LU12_L  | 7  | 1  | 1  | 84,816,263 | 105,439,476 | 1p31.1   | 1p21.1  |
| LU12_L  | 3  | 1  | 1  | 84,819,840 | 74,548,986  | 1p31.1   | 1p31.1  |
| LU20_L  | 4  | 15 | 15 | 84,861,947 | 78,191,578  | 15q25.2  | 15q24.3 |
| LU18_AD | 3  | 8  | 8  | 84,871,704 | 84,902,536  | 8q21.2   | 8q21.2  |
| LU12_L  | 10 | 1  | 1  | 84,878,801 | 81,068,929  | 1p31.1   | 1p31.1  |
| LU21_AD | 3  | 4  | 2  | 84,885,154 | 36,013,707  | 4q21.23  | 2p22.3  |
| LU12_L  | 5  | 1  | 1  | 84,894,691 | 84,423,460  | 1p31.1   | 1p31.1  |
| LU18_AD | 3  | 8  | 8  | 84,902,536 | 84,871,704  | 8q21.2   | 8q21.2  |
| LU12_L  | 9  | 16 | 16 | 84,907,115 | 84,812,202  | 16q24.1  | 16q24.1 |
| LU12_AD | 15 | 16 | 16 | 84,909,599 | 84,807,021  | 16q24.1  | 16q24.1 |
| LU12_L  | 5  | 4  | 6  | 84,912,607 | 70,602,824  | 4q21.23  | 6q13    |
| LU3_AD  | 3  | 15 | 24 | 84,920,838 | 27,577,456  | 15q25.2  | Yq11.23 |
| LU3_AD  | 3  | 10 | 10 | 84,926,564 | 84,963,390  | 10q23.1  | 10q23.1 |
| LU3_AD  | 3  | 10 | 10 | 84,963,390 | 84,926,564  | 10q23.1  | 10q23.1 |
| LU12_L  | 8  | 1  | 1  | 85,006,935 | 82,070,839  | 1p22.3   | 1p31.1  |
| LU12_L  | 6  | 1  | 1  | 85,047,875 | 106,501,351 | 1p22.3   | 1p21.1  |
| LU12_L  | 6  | 1  | 1  | 85,047,954 | 83,293,051  | 1p22.3   | 1p31.1  |
| LU12_L  | 8  | 1  | 1  | 85,051,791 | 107,049,002 | 1p22.3   | 1p21.1  |
| LU12_L  | 8  | 1  | 1  | 85,088,972 | 82,165,879  | 1p22.3   | 1p31.1  |
| LU12_L  | 10 | 1  | 1  | 85,114,909 | 84,599,821  | 1p22.3   | 1p31.1  |
| LU12_L  | 5  | 1  | 1  | 85,152,474 | 95,799,192  | 1p22.3   | 1p21.3  |
| LU12_L  | 13 | 1  | 1  | 85,165,123 | 106,048,576 | 1p22.3   | 1p21.1  |
| LU4_AD  | 18 | 23 | 5  | 85,166,559 | 164,069,743 | Xq21.2   | 5q34    |
| LU18_AD | 3  | 4  | 8  | 85,178,944 | 90,107,740  | 4q21.23  | 8q21.3  |
| LU12_L  | 4  | 12 | 12 | 85,190,113 | 59,246,818  | 12q21.31 | 12q14.1 |
| LU11_AD | 4  | 10 | 10 | 85,192,686 | 83,490,345  | 10q23.1  | 10q23.1 |
| LU12_L  | 8  | 1  | 1  | 85,229,823 | 97,365,842  | 1p22.3   | 1p21.3  |
| LU12_L  | 15 | 1  | 1  | 85,235,952 | 86,705,050  | 1p22.3   | 1p22.3  |
| LU12_L  | 5  | 1  | 1  | 85,289,944 | 97,592,930  | 1p22.3   | 1p21.3  |
| LU12_L  | 9  | 1  | 1  | 85,292,532 | 103,112,735 | 1p22.3   | 1p21.1  |

|         |    |    |    |            |             |         |         |
|---------|----|----|----|------------|-------------|---------|---------|
| LU3_AD  | 5  | 10 | 10 | 85,297,173 | 85,327,915  | 10q23.1 | 10q23.1 |
| LU12_L  | 4  | 1  | 1  | 85,302,551 | 93,698,765  | 1p22.3  | 1p22.1  |
| LU12_L  | 10 | 1  | 1  | 85,310,425 | 82,705,450  | 1p22.3  | 1p31.1  |
| LU12_L  | 7  | 1  | 1  | 85,313,290 | 85,367,210  | 1p22.3  | 1p22.3  |
| LU12_L  | 9  | 1  | 1  | 85,314,986 | 95,813,077  | 1p22.3  | 1p21.3  |
| LU3_L   | 3  | 11 | 5  | 85,321,194 | 42,109,111  | 11q14.1 | 5p13.1  |
| LU21_L  | 4  | 11 | 5  | 85,323,933 | 96,649,233  | 11q14.1 | 5q15    |
| LU3_AD  | 5  | 10 | 10 | 85,327,915 | 85,297,173  | 10q23.1 | 10q23.1 |
| LU12_L  | 9  | 1  | 1  | 85,344,090 | 107,766,523 | 1p22.3  | 1p13.3  |
| LU12_L  | 6  | 1  | 1  | 85,362,775 | 80,735,643  | 1p22.3  | 1p31.1  |
| LU12_L  | 7  | 1  | 1  | 85,367,210 | 85,313,290  | 1p22.3  | 1p22.3  |
| LU12_AD | 3  | 6  | 1  | 85,417,944 | 205,836,678 | 6q14.3  | 1q32.1  |
| LU21_AD | 4  | 6  | 5  | 85,425,579 | 59,958,936  | 6q14.3  | 5q12.1  |
| LU7_AD  | 3  | 6  | 5  | 85,429,073 | 59,955,703  | 6q14.3  | 5q12.1  |
| LU12_L  | 3  | 1  | 1  | 85,442,939 | 97,127,407  | 1p22.3  | 1p21.3  |
| LU12_AD | 3  | 11 | 11 | 85,470,819 | 85,540,841  | 11q14.1 | 11q14.1 |
| LU12_L  | 3  | 1  | 1  | 85,482,628 | 93,646,557  | 1p22.3  | 1p22.1  |
| LU12_L  | 8  | 1  | 1  | 85,514,208 | 82,058,976  | 1p22.3  | 1p31.1  |
| LU12_L  | 9  | 1  | 1  | 85,528,983 | 73,712,191  | 1p22.3  | 1p31.1  |
| LU12_AD | 3  | 11 | 11 | 85,540,841 | 85,470,819  | 11q14.1 | 11q14.1 |
| LU12_L  | 5  | 1  | 1  | 85,597,532 | 94,284,389  | 1p22.3  | 1p22.1  |
| LU12_L  | 8  | 1  | 1  | 85,632,961 | 82,540,982  | 1p22.3  | 1p31.1  |
| LU12_L  | 8  | 1  | 1  | 85,637,603 | 108,559,142 | 1p22.3  | 1p13.3  |
| LU12_L  | 4  | 1  | 1  | 85,638,797 | 88,672,603  | 1p22.3  | 1p22.2  |
| LU18_L  | 6  | 6  | 19 | 85,677,918 | 11,991,153  | 6q14.3  | 19p13.2 |
| LU12_L  | 12 | 1  | 1  | 85,714,808 | 73,715,449  | 1p22.3  | 1p31.1  |
| LU15_L  | 3  | 15 | 15 | 85,722,255 | 75,541,980  | 15q25.3 | 15q24.2 |
| LU3_L   | 3  | 10 | 4  | 85,727,092 | 175,901,933 | 10q23.1 | 4q34.1  |
| LU18_AD | 3  | 10 | 12 | 85,730,935 | 64,731,725  | 10q23.1 | 12q14.2 |
| LU4_AD  | 11 | 1  | 1  | 85,744,999 | 90,497,427  | 1p22.3  | 1p22.2  |
| LU11_AD | 3  | 15 | 15 | 85,795,029 | 83,006,131  | 15q25.3 | 15q25.2 |
| LU4_AD  | 3  | 6  | 9  | 85,802,725 | 88,766,038  | 6q14.3  | 9q21.33 |
| LU12_L  | 4  | 1  | 1  | 85,811,605 | 106,912,270 | 1p22.3  | 1p21.1  |
| LU12_L  | 13 | 1  | 1  | 85,815,737 | 74,489,027  | 1p22.3  | 1p31.1  |
| LU4_AD  | 3  | 23 | 23 | 85,823,196 | 85,860,047  | Xq21.2  | Xq21.2  |
| LU12_L  | 5  | 1  | 1  | 85,824,935 | 76,369,184  | 1p22.3  | 1p31.1  |
| LU12_L  | 8  | 1  | 1  | 85,825,811 | 76,784,647  | 1p22.3  | 1p31.1  |
| LU12_L  | 8  | 1  | 1  | 85,858,933 | 86,433,272  | 1p22.3  | 1p22.3  |
| LU4_AD  | 3  | 23 | 23 | 85,860,047 | 85,823,196  | Xq21.2  | Xq21.2  |
| LU12_L  | 8  | 1  | 1  | 85,863,206 | 87,791,507  | 1p22.3  | 1p22.3  |
| LU12_L  | 11 | 1  | 1  | 85,933,855 | 93,577,704  | 1p22.3  | 1p22.1  |
| LU4_AD  | 4  | 10 | 1  | 85,935,860 | 227,307,647 | 10q23.1 | 1q42.13 |
| LU4_L   | 7  | 10 | 1  | 85,937,655 | 227,305,832 | 10q23.1 | 1q42.13 |
| LU12_L  | 6  | 1  | 1  | 85,940,890 | 80,343,771  | 1p22.3  | 1p31.1  |

|         |    |    |    |            |             |          |         |
|---------|----|----|----|------------|-------------|----------|---------|
| LU12_L  | 4  | 1  | 1  | 85,965,460 | 95,233,937  | 1p22.3   | 1p21.3  |
| LU12_L  | 13 | 1  | 1  | 85,966,313 | 83,065,448  | 1p22.3   | 1p31.1  |
| LU12_L  | 6  | 1  | 1  | 85,974,772 | 81,905,557  | 1p22.3   | 1p31.1  |
| LU18_L  | 3  | 4  | 4  | 85,983,344 | 86,027,607  | 4q21.23  | 4q21.23 |
| LU12_L  | 5  | 1  | 1  | 86,000,545 | 87,340,270  | 1p22.3   | 1p22.3  |
| LU18_L  | 3  | 4  | 4  | 86,027,607 | 85,983,344  | 4q21.23  | 4q21.23 |
| LU4_AD  | 6  | 23 | 7  | 86,034,537 | 3,123,033   | Xq21.2   | 7p22.2  |
| LU4_AD  | 7  | 23 | 7  | 86,037,384 | 10,978,318  | Xq21.2   | 7p21.3  |
| LU15_L  | 6  | 3  | 3  | 86,062,167 | 88,043,888  | 3p12.1   | 3p11.1  |
| LU12_L  | 8  | 1  | 1  | 86,063,608 | 95,131,178  | 1p22.3   | 1p21.3  |
| LU12_L  | 6  | 1  | 1  | 86,080,988 | 83,050,494  | 1p22.3   | 1p31.1  |
| LU15_L  | 12 | 3  | 3  | 86,112,260 | 87,045,787  | 3p12.1   | 3p12.1  |
| LU12_L  | 5  | 1  | 1  | 86,160,518 | 92,743,117  | 1p22.3   | 1p22.1  |
| LU12_L  | 16 | 1  | 1  | 86,169,929 | 87,053,155  | 1p22.3   | 1p22.3  |
| LU12_L  | 5  | 1  | 1  | 86,174,584 | 88,919,507  | 1p22.3   | 1p22.2  |
| LU12_L  | 7  | 1  | 1  | 86,184,593 | 82,711,836  | 1p22.3   | 1p31.1  |
| LU12_L  | 7  | 1  | 1  | 86,184,874 | 82,393,596  | 1p22.3   | 1p31.1  |
| LU18_L  | 3  | 10 | 10 | 86,214,260 | 86,244,770  | 10q23.1  | 10q23.1 |
| LU12_L  | 9  | 1  | 1  | 86,227,116 | 86,435,775  | 1p22.3   | 1p22.3  |
| LU18_L  | 3  | 10 | 10 | 86,244,770 | 86,214,260  | 10q23.1  | 10q23.1 |
| LU14_L  | 3  | 4  | 4  | 86,356,608 | 165,104,071 | 4q21.23  | 4q32.3  |
| LU16_L  | 3  | 12 | 7  | 86,373,487 | 16,919,058  | 12q21.31 | 7p21.1  |
| LU3_L   | 3  | 14 | 12 | 86,391,087 | 105,997,191 | 14q31.3  | 12q23.3 |
| LU12_L  | 5  | 1  | 1  | 86,400,023 | 83,651,949  | 1p22.3   | 1p31.1  |
| LU12_L  | 15 | 1  | 1  | 86,402,029 | 90,300,209  | 1p22.3   | 1p22.2  |
| LU12_L  | 3  | 1  | 1  | 86,406,632 | 103,085,760 | 1p22.3   | 1p21.1  |
| LU12_L  | 4  | 1  | 1  | 86,412,851 | 97,488,879  | 1p22.3   | 1p21.3  |
| LU12_L  | 8  | 1  | 1  | 86,433,272 | 85,858,933  | 1p22.3   | 1p22.3  |
| LU12_L  | 9  | 1  | 1  | 86,435,775 | 86,227,116  | 1p22.3   | 1p22.3  |
| LU21_AD | 13 | 14 | 14 | 86,453,663 | 86,489,857  | 14q31.3  | 14q31.3 |
| LU21_AD | 13 | 14 | 14 | 86,489,857 | 86,453,663  | 14q31.3  | 14q31.3 |
| LU4_L   | 6  | 1  | 1  | 86,518,388 | 119,955,980 | 1p22.3   | 1p12    |
| LU4_AD  | 14 | 1  | 1  | 86,519,424 | 119,954,506 | 1p22.3   | 1p12    |
| LU12_L  | 3  | 1  | 1  | 86,520,747 | 97,462,196  | 1p22.3   | 1p21.3  |
| LU12_L  | 4  | 11 | 3  | 86,547,726 | 27,046,317  | 11q14.2  | 3p24.1  |
| LU3_AD  | 7  | 8  | 8  | 86,554,884 | 82,370,615  | 8q21.2   | 8q21.13 |
| LU12_L  | 8  | 1  | 1  | 86,567,699 | 90,297,420  | 1p22.3   | 1p22.2  |
| LU12_L  | 6  | 1  | 1  | 86,575,140 | 79,667,372  | 1p22.3   | 1p31.1  |
| LU16_L  | 3  | 3  | 18 | 86,586,262 | 71,965,966  | 3p12.1   | 18q22.3 |
| LU12_L  | 9  | 1  | 1  | 86,590,179 | 107,552,149 | 1p22.3   | 1p13.3  |
| LU12_L  | 8  | 1  | 1  | 86,610,441 | 81,266,551  | 1p22.3   | 1p31.1  |
| LU12_L  | 11 | 1  | 1  | 86,650,580 | 97,392,347  | 1p22.3   | 1p21.3  |
| LU12_L  | 15 | 1  | 1  | 86,668,344 | 75,669,913  | 1p22.3   | 1p31.1  |
| LU12_L  | 6  | 1  | 1  | 86,672,133 | 82,761,480  | 1p22.3   | 1p31.1  |

|         |    |    |    |            |             |          |          |
|---------|----|----|----|------------|-------------|----------|----------|
| LU12_L  | 7  | 1  | 1  | 86,683,488 | 106,452,938 | 1p22.3   | 1p21.1   |
| LU12_L  | 12 | 1  | 1  | 86,700,539 | 100,100,155 | 1p22.3   | 1p21.2   |
| LU12_L  | 15 | 1  | 1  | 86,705,050 | 85,235,952  | 1p22.3   | 1p22.3   |
| LU14_L  | 3  | 12 | 12 | 86,706,427 | 86,736,565  | 12q21.32 | 12q21.32 |
| LU12_L  | 5  | 1  | 1  | 86,726,659 | 93,496,158  | 1p22.3   | 1p22.1   |
| LU14_L  | 3  | 12 | 12 | 86,736,565 | 86,706,427  | 12q21.32 | 12q21.32 |
| LU3_L   | 6  | 16 | 4  | 86,771,328 | 104,475,260 | 16q24.1  | 4q24     |
| LU4_AD  | 3  | 5  | 19 | 86,806,724 | 9,824,058   | 5q14.3   | 19p13.2  |
| LU12_L  | 6  | 1  | 1  | 86,810,600 | 90,039,604  | 1p22.3   | 1p22.2   |
| LU12_L  | 5  | 1  | 1  | 86,832,670 | 82,434,803  | 1p22.3   | 1p31.1   |
| LU12_L  | 5  | 1  | 1  | 86,835,670 | 92,665,472  | 1p22.3   | 1p22.1   |
| LU12_L  | 3  | 1  | 1  | 86,841,236 | 105,762,482 | 1p22.3   | 1p21.1   |
| LU12_L  | 15 | 1  | 1  | 86,842,116 | 95,524,191  | 1p22.3   | 1p21.3   |
| LU12_L  | 9  | 1  | 1  | 86,853,860 | 108,747,688 | 1p22.3   | 1p13.3   |
| LU3_L   | 5  | 15 | 15 | 86,869,669 | 86,900,631  | 15q25.3  | 15q25.3  |
| LU12_L  | 7  | 1  | 1  | 86,876,268 | 82,432,110  | 1p22.3   | 1p31.1   |
| LU12_L  | 13 | 1  | 1  | 86,878,048 | 74,684,786  | 1p22.3   | 1p31.1   |
| LU12_L  | 9  | 1  | 1  | 86,888,295 | 76,233,362  | 1p22.3   | 1p31.1   |
| LU12_L  | 8  | 1  | 1  | 86,897,927 | 92,716,062  | 1p22.3   | 1p22.1   |
| LU3_L   | 5  | 15 | 15 | 86,900,631 | 86,869,669  | 15q25.3  | 15q25.3  |
| LU12_L  | 27 | 1  | 1  | 86,921,071 | 74,860,023  | 1p22.3   | 1p31.1   |
| LU18_L  | 4  | 10 | 3  | 86,946,182 | 30,319,711  | 10q23.1  | 3p24.1   |
| LU4_AD  | 3  | 2  | 2  | 86,956,880 | 87,268,435  | 2p11.2   | 2p11.2   |
| LU12_L  | 5  | 1  | 1  | 86,983,571 | 95,451,406  | 1p22.3   | 1p21.3   |
| LU12_L  | 3  | 1  | 1  | 86,997,896 | 96,016,588  | 1p22.3   | 1p21.3   |
| LU12_L  | 3  | 1  | 1  | 87,033,447 | 102,850,678 | 1p22.3   | 1p21.1   |
| LU15_L  | 12 | 3  | 3  | 87,045,787 | 86,112,260  | 3p12.1   | 3p12.1   |
| LU12_L  | 18 | 1  | 1  | 87,046,287 | 75,439,628  | 1p22.3   | 1p31.1   |
| LU12_L  | 15 | 1  | 1  | 87,049,311 | 93,090,044  | 1p22.3   | 1p22.1   |
| LU12_L  | 10 | 1  | 1  | 87,049,729 | 107,919,016 | 1p22.3   | 1p13.3   |
| LU12_L  | 16 | 1  | 1  | 87,053,155 | 86,169,929  | 1p22.3   | 1p22.3   |
| LU18_AD | 3  | 9  | 9  | 87,105,083 | 87,140,330  | 9q21.33  | 9q21.33  |
| LU12_L  | 5  | 1  | 1  | 87,106,806 | 106,904,374 | 1p22.3   | 1p21.1   |
| LU18_AD | 3  | 9  | 9  | 87,140,330 | 87,105,083  | 9q21.33  | 9q21.33  |
| LU18_L  | 5  | 2  | 2  | 87,149,894 | 87,352,032  | 2p11.2   | 2p11.2   |
| LU3_L   | 4  | 6  | 3  | 87,184,203 | 146,127,945 | 6q14.3   | 3q24     |
| LU21_L  | 5  | 6  | 3  | 87,184,937 | 164,056,874 | 6q14.3   | 3q26.1   |
| LU12_L  | 3  | 6  | 5  | 87,185,142 | 95,047,175  | 6q14.3   | 5q15     |
| LU5_L   | 3  | 14 | 14 | 87,214,514 | 87,245,219  | 14q31.3  | 14q31.3  |
| LU5_L   | 3  | 14 | 14 | 87,245,219 | 87,214,514  | 14q31.3  | 14q31.3  |
| LU4_AD  | 3  | 2  | 2  | 87,268,435 | 86,956,880  | 2p11.2   | 2p11.2   |
| LU21_AD | 3  | 1  | 18 | 87,271,712 | 5,085,905   | 1p22.3   | 18p11.31 |
| LU12_L  | 4  | 1  | 4  | 87,273,944 | 103,155,848 | 1p22.3   | 4q24     |
| LU12_L  | 5  | 1  | 1  | 87,340,270 | 86,000,545  | 1p22.3   | 1p22.3   |

|         |    |    |    |            |             |         |          |
|---------|----|----|----|------------|-------------|---------|----------|
| LU12_L  | 9  | 1  | 1  | 87,347,258 | 97,311,426  | 1p22.3  | 1p21.3   |
| LU18_L  | 5  | 2  | 2  | 87,352,032 | 87,149,894  | 2p11.2  | 2p11.2   |
| LU20_AD | 5  | 14 | 14 | 87,383,338 | 87,424,009  | 14q31.3 | 14q31.3  |
| LU18_AD | 4  | 4  | 7  | 87,385,903 | 151,738,954 | 4q21.3  | 7q36.1   |
| LU16_AD | 3  | 6  | 1  | 87,386,399 | 161,225,913 | 6q14.3  | 1q23.3   |
| LU12_L  | 11 | 1  | 1  | 87,387,517 | 92,798,811  | 1p22.3  | 1p22.1   |
| LU14_L  | 4  | 6  | 6  | 87,389,051 | 19,274,995  | 6q14.3  | 6p22.3   |
| LU12_L  | 5  | 1  | 1  | 87,404,063 | 80,533,477  | 1p22.3  | 1p31.1   |
| LU12_L  | 15 | 1  | 1  | 87,421,783 | 76,531,877  | 1p22.3  | 1p31.1   |
| LU20_AD | 5  | 14 | 14 | 87,424,009 | 87,383,338  | 14q31.3 | 14q31.3  |
| LU12_L  | 7  | 1  | 1  | 87,448,439 | 106,032,382 | 1p22.3  | 1p21.1   |
| LU12_L  | 5  | 1  | 1  | 87,451,664 | 99,717,231  | 1p22.3  | 1p21.2   |
| LU12_L  | 6  | 1  | 1  | 87,459,026 | 80,537,825  | 1p22.3  | 1p31.1   |
| LU11_AD | 4  | 8  | 3  | 87,477,304 | 98,379,158  | 8q21.3  | 3q12.1   |
| LU6_L   | 6  | 14 | 14 | 87,483,338 | 87,514,565  | 14q31.3 | 14q31.3  |
| LU6_L   | 6  | 14 | 14 | 87,514,565 | 87,483,338  | 14q31.3 | 14q31.3  |
| LU21_AD | 3  | 15 | 11 | 87,588,710 | 83,142,483  | 15q25.3 | 11q14.1  |
| LU12_L  | 8  | 1  | 1  | 87,588,966 | 92,667,108  | 1p22.3  | 1p22.1   |
| LU12_L  | 9  | 1  | 1  | 87,595,592 | 81,258,296  | 1p22.3  | 1p31.1   |
| LU12_L  | 16 | 1  | 1  | 87,621,858 | 83,513,805  | 1p22.3  | 1p31.1   |
| LU12_L  | 11 | 1  | 1  | 87,626,913 | 106,526,925 | 1p22.3  | 1p21.1   |
| LU12_L  | 19 | 1  | 1  | 87,641,546 | 99,172,435  | 1p22.3  | 1p21.3   |
| LU12_L  | 7  | 1  | 1  | 87,642,293 | 105,466,361 | 1p22.3  | 1p21.1   |
| LU12_L  | 11 | 1  | 1  | 87,648,153 | 82,339,315  | 1p22.3  | 1p31.1   |
| LU12_L  | 11 | 1  | 1  | 87,653,237 | 103,365,002 | 1p22.3  | 1p21.1   |
| LU12_L  | 10 | 1  | 1  | 87,661,203 | 76,430,394  | 1p22.3  | 1p31.1   |
| LU12_L  | 15 | 1  | 1  | 87,724,065 | 109,389,522 | 1p22.3  | 1p13.3   |
| LU12_L  | 12 | 1  | 1  | 87,728,827 | 76,400,821  | 1p22.3  | 1p31.1   |
| LU12_L  | 10 | 1  | 1  | 87,730,896 | 80,702,345  | 1p22.3  | 1p31.1   |
| LU7_AD  | 3  | 3  | 12 | 87,783,462 | 68,944,686  | 3p11.2  | 12q15    |
| LU14_L  | 3  | 3  | 11 | 87,788,597 | 101,117,062 | 3p11.2  | 11q22.1  |
| LU12_L  | 8  | 1  | 1  | 87,791,507 | 85,863,206  | 1p22.3  | 1p22.3   |
| LU12_L  | 14 | 1  | 1  | 87,801,201 | 94,331,928  | 1p22.3  | 1p22.1   |
| LU21_AD | 4  | 8  | 24 | 87,941,013 | 16,273,074  | 8q21.3  | Yq11.221 |
| LU7_AD  | 3  | 6  | 6  | 88,023,455 | 88,053,181  | 6q15    | 6q15     |
| LU15_L  | 6  | 3  | 3  | 88,043,888 | 86,062,167  | 3p11.1  | 3p12.1   |
| LU15_L  | 3  | 3  | 3  | 88,045,558 | 88,491,119  | 3p11.1  | 3p11.1   |
| LU7_AD  | 3  | 6  | 6  | 88,053,181 | 88,023,455  | 6q15    | 6q15     |
| LU12_L  | 4  | 1  | 1  | 88,054,332 | 91,854,244  | 1p22.3  | 1p22.2   |
| LU12_L  | 7  | 1  | 1  | 88,078,081 | 88,250,291  | 1p22.3  | 1p22.3   |
| LU12_L  | 4  | 1  | 1  | 88,078,128 | 82,545,627  | 1p22.3  | 1p31.1   |
| LU7_AD  | 4  | 2  | 2  | 88,082,236 | 113,142,708 | 2p11.2  | 2q13     |
| LU12_L  | 5  | 1  | 1  | 88,100,444 | 99,926,694  | 1p22.3  | 1p21.2   |
| LU3_AD  | 3  | 2  | 2  | 88,103,124 | 88,269,206  | 2p11.2  | 2p11.2   |



|         |    |    |    |            |             |          |         |
|---------|----|----|----|------------|-------------|----------|---------|
| LU12_L  | 4  | 1  | 1  | 88,104,420 | 104,236,482 | 1p22.3   | 1p21.1  |
| LU5_AD  | 3  | 7  | 7  | 88,125,920 | 88,164,190  | 7q21.12  | 7q21.12 |
| LU3_L   | 3  | 7  | 7  | 88,132,835 | 88,162,957  | 7q21.12  | 7q21.12 |
| LU3_L   | 3  | 7  | 7  | 88,162,957 | 88,132,835  | 7q21.12  | 7q21.12 |
| LU5_AD  | 3  | 7  | 7  | 88,164,190 | 88,125,920  | 7q21.12  | 7q21.12 |
| LU12_L  | 8  | 1  | 1  | 88,172,263 | 100,307,973 | 1p22.3   | 1p21.2  |
| LU12_L  | 9  | 1  | 1  | 88,181,342 | 109,063,732 | 1p22.3   | 1p13.3  |
| LU12_L  | 18 | 1  | 1  | 88,188,686 | 77,405,378  | 1p22.3   | 1p31.1  |
| LU12_L  | 9  | 1  | 1  | 88,196,349 | 100,060,313 | 1p22.3   | 1p21.2  |
| LU12_L  | 7  | 1  | 1  | 88,250,291 | 88,078,081  | 1p22.3   | 1p22.3  |
| LU12_L  | 5  | 1  | 1  | 88,250,582 | 82,544,999  | 1p22.3   | 1p31.1  |
| LU3_AD  | 3  | 2  | 2  | 88,269,206 | 88,103,124  | 2p11.2   | 2p11.2  |
| LU3_AD  | 3  | 14 | 23 | 88,276,305 | 94,717,265  | 14q31.3  | Xq21.33 |
| LU20_AD | 3  | 15 | 15 | 88,277,907 | 88,312,667  | 15q25.3  | 15q25.3 |
| LU20_AD | 3  | 15 | 15 | 88,312,667 | 88,277,907  | 15q25.3  | 15q25.3 |
| LU3_L   | 4  | 4  | 2  | 88,324,874 | 84,694,611  | 4q22.1   | 2p11.2  |
| LU3_L   | 3  | 5  | 5  | 88,327,439 | 88,359,698  | 5q14.3   | 5q14.3  |
| LU4_AD  | 11 | 23 | 23 | 88,348,422 | 84,318,217  | Xq21.31  | Xq21.1  |
| LU3_L   | 3  | 5  | 5  | 88,359,698 | 88,327,439  | 5q14.3   | 5q14.3  |
| LU4_AD  | 12 | 23 | 5  | 88,403,372 | 173,026,999 | Xq21.31  | 5q35.2  |
| LU5_AD  | 4  | 7  | 7  | 88,404,226 | 88,435,308  | 7q21.13  | 7q21.13 |
| LU5_AD  | 4  | 7  | 7  | 88,435,308 | 88,404,226  | 7q21.13  | 7q21.13 |
| LU4_AD  | 12 | 23 | 23 | 88,459,597 | 90,861,986  | Xq21.31  | Xq21.31 |
| LU12_L  | 13 | 1  | 1  | 88,459,805 | 95,156,569  | 1p22.2   | 1p21.3  |
| LU12_L  | 10 | 1  | 1  | 88,462,067 | 88,919,880  | 1p22.2   | 1p22.2  |
| LU15_L  | 3  | 3  | 3  | 88,491,119 | 88,045,558  | 3p11.1   | 3p11.1  |
| LU12_L  | 4  | 1  | 1  | 88,491,689 | 94,340,113  | 1p22.2   | 1p22.1  |
| LU16_L  | 4  | 9  | 7  | 88,497,788 | 92,113,867  | 9q21.33  | 7q21.2  |
| LU12_L  | 11 | 1  | 1  | 88,504,151 | 89,217,149  | 1p22.2   | 1p22.2  |
| LU12_L  | 9  | 1  | 1  | 88,504,721 | 109,820,768 | 1p22.2   | 1p13.3  |
| LU12_L  | 4  | 1  | 1  | 88,517,463 | 88,648,145  | 1p22.2   | 1p22.2  |
| LU12_L  | 8  | 1  | 1  | 88,521,631 | 94,503,937  | 1p22.2   | 1p22.1  |
| LU12_L  | 11 | 1  | 1  | 88,578,186 | 77,135,125  | 1p22.2   | 1p31.1  |
| LU18_AD | 11 | 5  | 5  | 88,580,309 | 39,136,118  | 5q14.3   | 5p13.1  |
| LU18_L  | 12 | 5  | 5  | 88,580,629 | 39,136,522  | 5q14.3   | 5p13.1  |
| LU12_L  | 4  | 1  | 1  | 88,604,121 | 78,471,716  | 1p22.2   | 1p31.1  |
| LU12_L  | 10 | 1  | 1  | 88,607,029 | 109,543,641 | 1p22.2   | 1p13.3  |
| LU12_L  | 5  | 1  | 1  | 88,618,890 | 89,219,543  | 1p22.2   | 1p22.2  |
| LU8_L   | 6  | 12 | 11 | 88,622,590 | 93,601,689  | 12q21.32 | 11q21   |
| LU12_L  | 6  | 1  | 1  | 88,629,588 | 101,060,876 | 1p22.2   | 1p21.2  |
| LU12_L  | 7  | 1  | 1  | 88,632,946 | 101,101,508 | 1p22.2   | 1p21.2  |
| LU12_L  | 4  | 1  | 1  | 88,648,145 | 88,517,463  | 1p22.2   | 1p22.2  |
| LU12_L  | 8  | 1  | 1  | 88,670,170 | 88,885,879  | 1p22.2   | 1p22.2  |
| LU12_L  | 9  | 1  | 1  | 88,672,285 | 108,558,982 | 1p22.2   | 1p13.3  |

|         |    |    |    |            |             |         |          |
|---------|----|----|----|------------|-------------|---------|----------|
| LU12_L  | 4  | 1  | 1  | 88,672,603 | 85,638,797  | 1p22.2  | 1p22.3   |
| LU12_L  | 13 | 1  | 1  | 88,759,809 | 97,093,527  | 1p22.2  | 1p21.3   |
| LU4_AD  | 3  | 9  | 6  | 88,766,038 | 85,802,725  | 9q21.33 | 6q14.3   |
| LU12_L  | 10 | 1  | 1  | 88,768,168 | 76,773,698  | 1p22.2  | 1p31.1   |
| LU12_L  | 9  | 1  | 1  | 88,778,759 | 99,227,800  | 1p22.2  | 1p21.3   |
| LU12_L  | 11 | 1  | 1  | 88,780,919 | 100,099,863 | 1p22.2  | 1p21.2   |
| LU12_L  | 16 | 1  | 1  | 88,841,459 | 109,914,678 | 1p22.2  | 1p13.3   |
| LU12_L  | 14 | 1  | 1  | 88,863,931 | 96,763,278  | 1p22.2  | 1p21.3   |
| LU12_L  | 8  | 1  | 1  | 88,885,879 | 88,670,170  | 1p22.2  | 1p22.2   |
| LU12_L  | 9  | 1  | 1  | 88,887,926 | 94,095,355  | 1p22.2  | 1p22.1   |
| LU12_L  | 5  | 1  | 1  | 88,919,507 | 86,174,584  | 1p22.2  | 1p22.3   |
| LU12_L  | 10 | 1  | 1  | 88,919,880 | 88,462,067  | 1p22.2  | 1p22.2   |
| LU12_L  | 9  | 1  | 1  | 88,920,296 | 99,718,479  | 1p22.2  | 1p21.2   |
| LU12_L  | 25 | 1  | 1  | 88,922,181 | 92,248,351  | 1p22.2  | 1p22.1   |
| LU12_L  | 7  | 1  | 1  | 88,930,631 | 96,462,184  | 1p22.2  | 1p21.3   |
| LU3_L   | 3  | 15 | 6  | 88,944,798 | 43,834,931  | 15q25.3 | 6p21.1   |
| LU12_L  | 11 | 1  | 1  | 88,945,097 | 79,758,515  | 1p22.2  | 1p31.1   |
| LU12_L  | 3  | 9  | 7  | 88,976,894 | 43,861,270  | 9q21.33 | 7p13     |
| LU16_AD | 4  | 9  | 23 | 88,981,902 | 148,904,012 | 9q21.33 | Xq28     |
| LU11_AD | 3  | 10 | 9  | 88,987,027 | 99,694,456  | 10q23.2 | 9q22.33  |
| LU18_AD | 3  | 2  | 22 | 89,019,239 | 47,977,654  | 2p11.2  | 22q13.31 |
| LU12_L  | 9  | 1  | 1  | 89,067,918 | 96,689,008  | 1p22.2  | 1p21.3   |
| LU16_L  | 3  | 4  | 12 | 89,075,008 | 59,715,230  | 4q22.1  | 12q14.1  |
| LU21_AD | 3  | 15 | 3  | 89,082,619 | 75,556,639  | 15q25.3 | 3p12.3   |
| LU12_L  | 5  | 1  | 1  | 89,094,369 | 101,547,067 | 1p22.2  | 1p21.2   |
| LU12_L  | 6  | 1  | 1  | 89,097,312 | 109,726,256 | 1p22.2  | 1p13.3   |
| LU12_L  | 13 | 1  | 1  | 89,101,227 | 81,243,595  | 1p22.2  | 1p31.1   |
| LU12_L  | 4  | 1  | 1  | 89,105,491 | 96,902,785  | 1p22.2  | 1p21.3   |
| LU12_L  | 5  | 1  | 1  | 89,119,378 | 78,042,079  | 1p22.2  | 1p31.1   |
| LU12_L  | 8  | 1  | 1  | 89,129,692 | 101,328,506 | 1p22.2  | 1p21.2   |
| LU12_L  | 8  | 1  | 1  | 89,172,338 | 101,357,944 | 1p22.2  | 1p21.2   |
| LU12_L  | 11 | 1  | 1  | 89,217,149 | 88,504,151  | 1p22.2  | 1p22.2   |
| LU12_L  | 5  | 1  | 1  | 89,219,543 | 88,618,890  | 1p22.2  | 1p22.2   |
| LU12_L  | 5  | 1  | 1  | 89,222,868 | 89,392,400  | 1p22.2  | 1p22.2   |
| LU12_L  | 10 | 1  | 1  | 89,224,547 | 76,879,407  | 1p22.2  | 1p31.1   |
| LU8_L   | 3  | 7  | 9  | 89,257,340 | 35,460,836  | 7q21.13 | 9p13.3   |
| LU5_L   | 3  | 7  | 7  | 89,287,497 | 89,323,457  | 7q21.13 | 7q21.13  |
| LU5_L   | 3  | 7  | 7  | 89,323,457 | 89,287,497  | 7q21.13 | 7q21.13  |
| LU21_AD | 3  | 6  | 6  | 89,357,522 | 89,410,547  | 6q15    | 6q15     |
| LU21_L  | 3  | 1  | 6  | 89,390,945 | 65,715,524  | 1p22.2  | 6q12     |
| LU12_L  | 5  | 1  | 1  | 89,392,400 | 89,222,868  | 1p22.2  | 1p22.2   |
| LU15_AD | 3  | 1  | 23 | 89,393,875 | 115,875,205 | 1p22.2  | Xq23     |
| LU12_L  | 7  | 1  | 1  | 89,397,287 | 101,371,739 | 1p22.2  | 1p21.2   |
| LU21_AD | 3  | 6  | 6  | 89,410,547 | 89,357,522  | 6q15    | 6q15     |

|         |    |    |    |            |             |          |          |
|---------|----|----|----|------------|-------------|----------|----------|
| LU18_AD | 3  | 6  | 2  | 89,432,343 | 119,709,605 | 6q15     | 2q14.2   |
| LU12_L  | 7  | 1  | 1  | 89,456,825 | 77,006,035  | 1p22.2   | 1p31.1   |
| LU12_L  | 5  | 1  | 1  | 89,457,151 | 109,623,435 | 1p22.2   | 1p13.3   |
| LU21_L  | 3  | 11 | 2  | 89,468,648 | 96,304,641  | 11q14.3  | 2q11.1   |
| LU8_L   | 3  | 11 | 2  | 89,486,392 | 96,291,339  | 11q14.3  | 2q11.1   |
| LU3_L   | 3  | 11 | 11 | 89,521,265 | 55,643,288  | 11q14.3  | 11q11    |
| LU14_AD | 5  | 11 | 11 | 89,545,729 | 89,693,436  | 11q14.3  | 11q14.3  |
| LU6_L   | 40 | 9  | 26 | 89,614,765 | 9,239       | 9q21.33  | 26       |
| LU6_AD  | 14 | 9  | 26 | 89,621,066 | 9,848       | 9q21.33  | 26       |
| LU5_AD  | 3  | 3  | 4  | 89,635,972 | 156,379,079 | 3p11.1   | 4q32.1   |
| LU12_L  | 3  | 11 | 3  | 89,673,387 | 8,742,055   | 11q14.3  | 3p25.3   |
| LU18_L  | 3  | 1  | 2  | 89,693,029 | 10,070,063  | 1p22.2   | 2p25.1   |
| LU14_AD | 5  | 11 | 11 | 89,693,436 | 89,545,729  | 11q14.3  | 11q14.3  |
| LU3_L   | 4  | 15 | 19 | 89,772,149 | 9,823,125   | 15q26.1  | 19p13.2  |
| LU12_L  | 4  | 1  | 1  | 89,817,953 | 92,565,239  | 1p22.2   | 1p22.1   |
| LU12_L  | 3  | 1  | 1  | 89,856,049 | 97,542,122  | 1p22.2   | 1p21.3   |
| LU4_AD  | 5  | 11 | 2  | 89,880,955 | 92,013,965  | 11q14.3  | 2p11.1   |
| LU12_L  | 3  | 11 | 2  | 89,881,675 | 92,013,357  | 11q14.3  | 2p11.1   |
| LU12_L  | 9  | 1  | 1  | 89,885,846 | 97,093,462  | 1p22.2   | 1p21.3   |
| LU6_L   | 4  | 4  | 4  | 89,886,733 | 89,920,848  | 4q22.1   | 4q22.1   |
| LU6_L   | 4  | 4  | 4  | 89,920,848 | 89,886,733  | 4q22.1   | 4q22.1   |
| LU4_L   | 3  | 23 | 23 | 89,947,886 | 89,980,720  | Xq21.31  | Xq21.31  |
| LU12_L  | 3  | 1  | 1  | 89,963,531 | 92,467,193  | 1p22.2   | 1p22.1   |
| LU12_L  | 6  | 1  | 1  | 89,972,490 | 78,493,070  | 1p22.2   | 1p31.1   |
| LU4_L   | 3  | 23 | 23 | 89,980,720 | 89,947,886  | Xq21.31  | Xq21.31  |
| LU12_L  | 3  | 1  | 1  | 89,991,502 | 109,044,836 | 1p22.2   | 1p13.3   |
| LU12_L  | 4  | 1  | 1  | 89,992,016 | 92,596,942  | 1p22.2   | 1p22.1   |
| LU12_L  | 5  | 1  | 1  | 89,994,133 | 81,255,086  | 1p22.2   | 1p31.1   |
| LU12_L  | 10 | 1  | 1  | 89,996,438 | 77,480,430  | 1p22.2   | 1p31.1   |
| LU12_L  | 7  | 1  | 1  | 90,024,007 | 102,078,885 | 1p22.2   | 1p21.2   |
| LU12_L  | 6  | 1  | 1  | 90,039,604 | 86,810,600  | 1p22.2   | 1p22.3   |
| LU18_AD | 6  | 5  | 5  | 90,044,019 | 97,600,829  | 5q14.3   | 5q15     |
| LU18_L  | 6  | 5  | 5  | 90,045,508 | 97,600,581  | 5q14.3   | 5q15     |
| LU18_AD | 3  | 8  | 4  | 90,107,740 | 85,178,944  | 8q21.3   | 4q21.23  |
| LU8_AD  | 3  | 2  | 2  | 90,195,263 | 90,244,994  | 2p11.2   | 2p11.2   |
| LU21_L  | 3  | 2  | 2  | 90,196,831 | 90,244,626  | 2p11.2   | 2p11.2   |
| LU20_AD | 5  | 10 | 10 | 90,198,937 | 90,231,341  | 10q23.31 | 10q23.31 |
| LU20_AD | 5  | 10 | 10 | 90,231,341 | 90,198,937  | 10q23.31 | 10q23.31 |
| LU12_AD | 3  | 16 | 10 | 90,235,286 | 38,738,599  | 16q24.3  | 10p11.1  |
| LU21_L  | 3  | 2  | 2  | 90,244,626 | 90,196,831  | 2p11.2   | 2p11.2   |
| LU8_AD  | 3  | 2  | 2  | 90,244,994 | 90,195,263  | 2p11.2   | 2p11.2   |
| LU12_L  | 18 | 1  | 1  | 90,285,958 | 91,195,686  | 1p22.2   | 1p22.2   |
| LU12_L  | 8  | 1  | 1  | 90,297,420 | 86,567,699  | 1p22.2   | 1p22.3   |
| LU12_L  | 15 | 1  | 1  | 90,300,209 | 86,402,029  | 1p22.2   | 1p22.3   |

|         |    |    |    |            |             |          |          |
|---------|----|----|----|------------|-------------|----------|----------|
| LU14_L  | 3  | 23 | 20 | 90,320,620 | 6,139,092   | Xq21.31  | 20p12.3  |
| LU3_AD  | 24 | 23 | 23 | 90,406,033 | 90,436,196  | Xq21.31  | Xq21.31  |
| LU21_AD | 3  | 2  | 17 | 90,406,320 | 21,547,266  | 2p11.2   | 17p11.2  |
| LU3_L   | 16 | 23 | 23 | 90,406,757 | 90,437,158  | Xq21.31  | Xq21.31  |
| LU18_L  | 4  | 9  | 4  | 90,429,012 | 139,979,643 | 9q22.1   | 4q31.1   |
| LU3_AD  | 24 | 23 | 23 | 90,436,196 | 90,406,033  | Xq21.31  | Xq21.31  |
| LU3_L   | 16 | 23 | 23 | 90,437,158 | 90,406,757  | Xq21.31  | Xq21.31  |
| LU12_L  | 4  | 1  | 1  | 90,464,010 | 74,221,666  | 1p22.2   | 1p31.1   |
| LU4_AD  | 11 | 1  | 1  | 90,497,427 | 85,744,999  | 1p22.2   | 1p22.3   |
| LU12_L  | 10 | 1  | 1  | 90,537,257 | 75,914,637  | 1p22.2   | 1p31.1   |
| LU12_L  | 3  | 1  | 1  | 90,712,846 | 93,075,849  | 1p22.2   | 1p22.1   |
| LU12_L  | 11 | 1  | 1  | 90,729,745 | 96,160,530  | 1p22.2   | 1p21.3   |
| LU3_AD  | 3  | 12 | 12 | 90,784,359 | 90,828,235  | 12q21.33 | 12q21.33 |
| LU12_L  | 5  | 1  | 1  | 90,811,138 | 91,940,940  | 1p22.2   | 1p22.2   |
| LU12_L  | 15 | 1  | 1  | 90,820,538 | 92,511,714  | 1p22.2   | 1p22.1   |
| LU3_AD  | 3  | 12 | 12 | 90,828,235 | 90,784,359  | 12q21.33 | 12q21.33 |
| LU12_L  | 3  | 1  | 1  | 90,833,523 | 91,030,577  | 1p22.2   | 1p22.2   |
| LU12_L  | 10 | 1  | 1  | 90,842,396 | 108,916,991 | 1p22.2   | 1p13.3   |
| LU16_AD | 3  | 11 | 1  | 90,848,326 | 52,249,800  | 11q14.3  | 1p32.3   |
| LU4_AD  | 12 | 23 | 23 | 90,861,986 | 88,459,597  | Xq21.31  | Xq21.31  |
| LU4_AD  | 5  | 23 | 24 | 90,862,132 | 6,401,745   | Xq21.31  | Yp11.2   |
| LU12_L  | 14 | 1  | 1  | 90,929,699 | 105,858,307 | 1p22.2   | 1p21.1   |
| LU12_L  | 17 | 1  | 1  | 90,941,331 | 108,665,028 | 1p22.2   | 1p13.3   |
| LU12_L  | 31 | 1  | 1  | 90,959,859 | 80,719,845  | 1p22.2   | 1p31.1   |
| LU21_AD | 5  | 4  | 4  | 90,989,640 | 61,541,030  | 4q22.1   | 4q13.1   |
| LU12_L  | 11 | 1  | 1  | 91,006,857 | 79,746,172  | 1p22.2   | 1p31.1   |
| LU12_L  | 14 | 1  | 1  | 91,025,743 | 99,468,842  | 1p22.2   | 1p21.3   |
| LU12_L  | 3  | 1  | 1  | 91,030,577 | 90,833,523  | 1p22.2   | 1p22.2   |
| LU12_L  | 7  | 1  | 1  | 91,040,716 | 93,836,055  | 1p22.2   | 1p22.1   |
| LU14_L  | 3  | 7  | 5  | 91,081,231 | 114,333,254 | 7q21.13  | 5q22.3   |
| LU3_AD  | 3  | 7  | 1  | 91,083,436 | 161,444,237 | 7q21.13  | 1q23.3   |
| LU18_L  | 4  | 11 | 11 | 91,167,353 | 91,201,696  | 11q14.3  | 11q14.3  |
| LU12_L  | 4  | 1  | 1  | 91,169,160 | 78,981,480  | 1p22.2   | 1p31.1   |
| LU12_L  | 6  | 1  | 1  | 91,172,050 | 106,961,998 | 1p22.2   | 1p21.1   |
| LU12_L  | 7  | 1  | 1  | 91,185,452 | 105,470,915 | 1p22.2   | 1p21.1   |
| LU12_L  | 18 | 1  | 1  | 91,195,686 | 90,285,958  | 1p22.2   | 1p22.2   |
| LU18_L  | 4  | 11 | 11 | 91,201,696 | 91,167,353  | 11q14.3  | 11q14.3  |
| LU12_L  | 15 | 1  | 1  | 91,203,658 | 100,857,576 | 1p22.2   | 1p21.2   |
| LU12_L  | 8  | 1  | 1  | 91,273,341 | 109,791,643 | 1p22.2   | 1p13.3   |
| LU12_L  | 5  | 1  | 1  | 91,344,151 | 83,418,395  | 1p22.2   | 1p31.1   |
| LU12_L  | 11 | 1  | 1  | 91,347,524 | 106,184,745 | 1p22.2   | 1p21.1   |
| LU7_AD  | 8  | 8  | 7  | 91,451,851 | 40,736,377  | 8q21.3   | 7p14.1   |
| LU7_L   | 6  | 8  | 7  | 91,452,664 | 40,737,341  | 8q21.3   | 7p14.1   |
| LU12_L  | 10 | 1  | 1  | 91,469,017 | 91,642,895  | 1p22.2   | 1p22.2   |

|        |    |    |    |            |             |          |          |
|--------|----|----|----|------------|-------------|----------|----------|
| LU12_L | 10 | 1  | 1  | 91,477,340 | 91,625,305  | 1p22.2   | 1p22.2   |
| LU18_L | 4  | 7  | 8  | 91,586,150 | 95,802,166  | 7q21.2   | 8q22.1   |
| LU7_L  | 5  | 1  | 1  | 91,602,221 | 101,917,227 | 1p22.2   | 1p21.2   |
| LU12_L | 7  | 1  | 1  | 91,621,349 | 102,722,512 | 1p22.2   | 1p21.1   |
| LU12_L | 10 | 1  | 1  | 91,625,305 | 91,477,340  | 1p22.2   | 1p22.2   |
| LU12_L | 7  | 1  | 1  | 91,628,562 | 79,864,700  | 1p22.2   | 1p31.1   |
| LU12_L | 20 | 1  | 1  | 91,628,715 | 101,472,114 | 1p22.2   | 1p21.2   |
| LU12_L | 5  | 1  | 1  | 91,629,321 | 105,065,791 | 1p22.2   | 1p21.1   |
| LU12_L | 18 | 1  | 1  | 91,636,872 | 74,251,737  | 1p22.2   | 1p31.1   |
| LU4_AD | 3  | 12 | 12 | 91,642,142 | 91,685,673  | 12q21.33 | 12q21.33 |
| LU12_L | 10 | 1  | 1  | 91,642,895 | 91,469,017  | 1p22.2   | 1p22.2   |
| LU12_L | 8  | 1  | 1  | 91,647,464 | 105,819,860 | 1p22.2   | 1p21.1   |
| LU4_L  | 3  | 2  | 16 | 91,663,025 | 33,068,779  | 2p11.1   | 16p11.2  |
| LU12_L | 12 | 1  | 1  | 91,663,493 | 93,831,427  | 1p22.2   | 1p22.1   |
| LU12_L | 3  | 1  | 4  | 91,669,445 | 12,428,673  | 1p22.2   | 4p15.33  |
| LU7_AD | 3  | 1  | 9  | 91,673,855 | 35,453,431  | 1p22.2   | 9p13.3   |
| LU4_AD | 3  | 12 | 12 | 91,685,673 | 91,642,142  | 12q21.33 | 12q21.33 |
| LU12_L | 5  | 1  | 1  | 91,703,911 | 91,774,184  | 1p22.2   | 1p22.2   |
| LU3_AD | 4  | 6  | 19 | 91,711,932 | 58,158,665  | 6q15     | 19q13.43 |
| LU12_L | 14 | 1  | 1  | 91,731,086 | 106,900,685 | 1p22.2   | 1p21.1   |
| LU4_L  | 3  | 10 | 4  | 91,752,114 | 45,032,643  | 10q23.31 | 4p12     |
| LU12_L | 4  | 1  | 1  | 91,768,455 | 91,818,405  | 1p22.2   | 1p22.2   |
| LU12_L | 5  | 1  | 1  | 91,774,184 | 91,703,911  | 1p22.2   | 1p22.2   |
| LU12_L | 4  | 1  | 1  | 91,818,405 | 91,768,455  | 1p22.2   | 1p22.2   |
| LU12_L | 8  | 1  | 1  | 91,846,544 | 79,380,664  | 1p22.2   | 1p31.1   |
| LU8_L  | 5  | 2  | 2  | 91,850,861 | 133,109,614 | 2p11.1   | 2q21.2   |
| LU12_L | 4  | 1  | 1  | 91,854,244 | 88,054,332  | 1p22.2   | 1p22.3   |
| LU21_L | 6  | 2  | 4  | 91,854,945 | 4,311,051   | 2p11.1   | 4p16.3   |
| LU14_L | 4  | 23 | 6  | 91,855,810 | 102,898,143 | Xq21.32  | 6q16.3   |
| LU15_L | 3  | 9  | 8  | 91,868,684 | 144,398,966 | 9q22.2   | 8q24.3   |
| LU3_L  | 3  | 2  | 7  | 91,902,929 | 151,958,203 | 2p11.1   | 7q36.1   |
| LU12_L | 5  | 1  | 1  | 91,938,562 | 92,695,021  | 1p22.2   | 1p22.1   |
| LU12_L | 5  | 1  | 1  | 91,940,940 | 90,811,138  | 1p22.2   | 1p22.2   |
| LU12_L | 6  | 1  | 1  | 91,950,859 | 105,641,710 | 1p22.2   | 1p21.1   |
| LU12_L | 8  | 1  | 1  | 91,958,669 | 98,763,303  | 1p22.2   | 1p21.3   |
| LU12_L | 13 | 1  | 1  | 92,006,931 | 106,981,915 | 1p22.1   | 1p21.1   |
| LU12_L | 3  | 2  | 11 | 92,013,357 | 89,881,675  | 2p11.1   | 11q14.3  |
| LU4_AD | 5  | 2  | 11 | 92,013,965 | 89,880,955  | 2p11.1   | 11q14.3  |
| LU12_L | 17 | 1  | 1  | 92,029,126 | 108,644,060 | 1p22.1   | 1p13.3   |
| LU3_L  | 3  | 4  | 6  | 92,099,055 | 165,877,442 | 4q22.1   | 6q27     |
| LU12_L | 4  | 4  | 4  | 92,099,636 | 45,049,137  | 4q22.1   | 4p12     |
| LU16_L | 4  | 7  | 9  | 92,113,867 | 88,497,788  | 7q21.2   | 9q21.33  |
| LU21_L | 3  | 1  | 8  | 92,128,182 | 56,618,994  | 1p22.1   | 8q12.1   |
| LU12_L | 5  | 1  | 1  | 92,152,285 | 84,351,930  | 1p22.1   | 1p31.1   |

|         |    |    |    |            |             |          |         |
|---------|----|----|----|------------|-------------|----------|---------|
| LU12_L  | 7  | 1  | 1  | 92,154,149 | 104,088,432 | 1p22.1   | 1p21.1  |
| LU12_L  | 11 | 1  | 1  | 92,240,848 | 80,811,971  | 1p22.1   | 1p31.1  |
| LU12_L  | 8  | 1  | 1  | 92,244,847 | 102,333,633 | 1p22.1   | 1p21.1  |
| LU12_L  | 18 | 1  | 1  | 92,248,262 | 79,740,820  | 1p22.1   | 1p31.1  |
| LU12_L  | 25 | 1  | 1  | 92,248,351 | 88,922,181  | 1p22.1   | 1p22.2  |
| LU21_L  | 4  | 4  | 1  | 92,276,048 | 206,283,385 | 4q22.1   | 1q32.1  |
| LU12_L  | 7  | 1  | 1  | 92,361,131 | 78,637,968  | 1p22.1   | 1p31.1  |
| LU5_L   | 4  | 14 | 12 | 92,434,297 | 106,565,692 | 14q32.12 | 12q23.3 |
| LU12_L  | 3  | 1  | 1  | 92,467,193 | 89,963,531  | 1p22.1   | 1p22.2  |
| LU18_AD | 3  | 8  | 8  | 92,482,010 | 92,520,825  | 8q21.3   | 8q21.3  |
| LU18_L  | 10 | 5  | 5  | 92,488,444 | 24,481,449  | 5q15     | 5p14.2  |
| LU18_AD | 7  | 5  | 5  | 92,489,178 | 24,483,106  | 5q15     | 5p14.2  |
| LU12_L  | 15 | 1  | 1  | 92,511,714 | 90,820,538  | 1p22.1   | 1p22.2  |
| LU18_AD | 3  | 8  | 8  | 92,520,825 | 92,482,010  | 8q21.3   | 8q21.3  |
| LU12_L  | 4  | 1  | 1  | 92,530,501 | 96,016,203  | 1p22.1   | 1p21.3  |
| LU8_AD  | 3  | 4  | 5  | 92,546,431 | 97,412,977  | 4q22.1   | 5q15    |
| LU12_L  | 9  | 1  | 1  | 92,561,748 | 78,494,694  | 1p22.1   | 1p31.1  |
| LU12_L  | 4  | 1  | 1  | 92,565,239 | 89,817,953  | 1p22.1   | 1p22.2  |
| LU16_L  | 3  | 10 | 6  | 92,565,791 | 131,617,404 | 10q23.31 | 6q23.2  |
| LU12_L  | 3  | 1  | 1  | 92,568,285 | 105,132,408 | 1p22.1   | 1p21.1  |
| LU12_L  | 4  | 1  | 1  | 92,596,942 | 89,992,016  | 1p22.1   | 1p22.2  |
| LU12_L  | 7  | 1  | 1  | 92,607,992 | 92,845,091  | 1p22.1   | 1p22.1  |
| LU18_L  | 4  | 4  | 5  | 92,618,075 | 1,580,785   | 4q22.1   | 5p15.33 |
| LU18_AD | 3  | 5  | 5  | 92,656,223 | 92,707,450  | 5q15     | 5q15    |
| LU3_AD  | 3  | 5  | 5  | 92,661,597 | 92,696,158  | 5q15     | 5q15    |
| LU12_L  | 3  | 1  | 1  | 92,662,643 | 82,381,765  | 1p22.1   | 1p31.1  |
| LU12_L  | 5  | 1  | 1  | 92,665,472 | 86,835,670  | 1p22.1   | 1p22.3  |
| LU12_L  | 8  | 1  | 1  | 92,667,108 | 87,588,966  | 1p22.1   | 1p22.3  |
| LU18_L  | 5  | 11 | 2  | 92,674,334 | 171,472,714 | 11q14.3  | 2q31.1  |
| LU12_L  | 11 | 1  | 1  | 92,684,712 | 92,776,904  | 1p22.1   | 1p22.1  |
| LU8_L   | 4  | 23 | 2  | 92,693,562 | 232,271,009 | Xq21.32  | 2q37.1  |
| LU12_L  | 5  | 1  | 1  | 92,695,021 | 91,938,562  | 1p22.1   | 1p22.2  |
| LU3_AD  | 3  | 5  | 5  | 92,696,158 | 92,661,597  | 5q15     | 5q15    |
| LU18_AD | 3  | 5  | 5  | 92,707,450 | 92,656,223  | 5q15     | 5q15    |
| LU3_AD  | 5  | 5  | 5  | 92,708,938 | 92,742,386  | 5q15     | 5q15    |
| LU12_L  | 8  | 1  | 1  | 92,716,062 | 86,897,927  | 1p22.1   | 1p22.3  |
| LU3_AD  | 5  | 5  | 5  | 92,742,386 | 92,708,938  | 5q15     | 5q15    |
| LU12_L  | 5  | 1  | 1  | 92,743,117 | 86,160,518  | 1p22.1   | 1p22.3  |
| LU12_L  | 4  | 15 | 2  | 92,752,306 | 40,900,886  | 15q26.1  | 2p22.1  |
| LU15_L  | 4  | 15 | 8  | 92,754,632 | 42,417,052  | 15q26.1  | 8p11.21 |
| LU6_AD  | 4  | 1  | 11 | 92,755,794 | 19,055,859  | 1p22.1   | 11p15.1 |
| LU12_L  | 11 | 1  | 1  | 92,776,904 | 92,684,712  | 1p22.1   | 1p22.1  |
| LU4_AD  | 4  | 12 | 10 | 92,780,843 | 17,059,985  | 12q22    | 10p13   |
| LU12_L  | 6  | 1  | 1  | 92,784,063 | 78,594,332  | 1p22.1   | 1p31.1  |

|         |    |    |    |            |             |          |          |
|---------|----|----|----|------------|-------------|----------|----------|
| LU3_L   | 3  | 1  | 1  | 92,790,634 | 92,821,371  | 1p22.1   | 1p22.1   |
| LU12_L  | 11 | 1  | 1  | 92,798,811 | 87,387,517  | 1p22.1   | 1p22.3   |
| LU12_L  | 7  | 1  | 1  | 92,819,398 | 76,657,485  | 1p22.1   | 1p31.1   |
| LU6_AD  | 3  | 1  | 11 | 92,821,218 | 6,076,676   | 1p22.1   | 11p15.4  |
| LU3_L   | 3  | 1  | 1  | 92,821,371 | 92,790,634  | 1p22.1   | 1p22.1   |
| LU12_L  | 5  | 1  | 1  | 92,829,034 | 109,704,969 | 1p22.1   | 1p13.3   |
| LU4_AD  | 3  | 11 | 19 | 92,837,300 | 19,895,107  | 11q21    | 19p13.11 |
| LU12_L  | 7  | 1  | 1  | 92,845,091 | 92,607,992  | 1p22.1   | 1p22.1   |
| LU5_L   | 3  | 5  | 5  | 92,866,958 | 92,898,395  | 5q15     | 5q15     |
| LU12_L  | 8  | 1  | 1  | 92,879,907 | 74,852,538  | 1p22.1   | 1p31.1   |
| LU5_L   | 3  | 5  | 5  | 92,898,395 | 92,866,958  | 5q15     | 5q15     |
| LU16_AD | 5  | 7  | 1  | 92,899,713 | 51,514,525  | 7q21.3   | 1p32.3   |
| LU18_L  | 5  | 4  | 5  | 92,906,210 | 133,013,631 | 4q22.1   | 5q31.1   |
| LU12_L  | 5  | 1  | 1  | 92,939,797 | 105,131,659 | 1p22.1   | 1p21.1   |
| LU12_L  | 9  | 1  | 1  | 92,948,027 | 78,540,634  | 1p22.1   | 1p31.1   |
| LU21_L  | 3  | 4  | 6  | 92,965,289 | 2,314,700   | 4q22.1   | 6p25.2   |
| LU5_L   | 3  | 11 | 14 | 92,996,807 | 49,024,812  | 11q21    | 14q21.3  |
| LU12_L  | 4  | 1  | 1  | 93,018,401 | 101,178,573 | 1p22.1   | 1p21.2   |
| LU8_L   | 4  | 6  | 22 | 93,043,667 | 32,508,079  | 6q15     | 22q12.3  |
| LU3_L   | 3  | 6  | 22 | 93,044,187 | 32,507,495  | 6q15     | 22q12.3  |
| LU20_AD | 3  | 10 | 10 | 93,046,365 | 93,098,120  | 10q23.32 | 10q23.32 |
| LU12_L  | 3  | 1  | 1  | 93,075,849 | 90,712,846  | 1p22.1   | 1p22.2   |
| LU12_L  | 15 | 1  | 1  | 93,090,044 | 87,049,311  | 1p22.1   | 1p22.3   |
| LU12_L  | 5  | 1  | 1  | 93,090,786 | 75,449,313  | 1p22.1   | 1p31.1   |
| LU20_AD | 3  | 10 | 10 | 93,098,120 | 93,046,365  | 10q23.32 | 10q23.32 |
| LU12_L  | 6  | 8  | 8  | 93,118,212 | 104,710,516 | 8q21.3   | 8q22.3   |
| LU3_AD  | 5  | 4  | 4  | 93,266,071 | 93,298,392  | 4q22.1   | 4q22.1   |
| LU5_L   | 4  | 11 | 15 | 93,269,086 | 40,328,100  | 11q21    | 15q15.1  |
| LU3_AD  | 5  | 4  | 4  | 93,298,392 | 93,266,071  | 4q22.1   | 4q22.1   |
| LU18_L  | 6  | 11 | 11 | 93,308,177 | 6,177,785   | 11q21    | 11p15.4  |
| LU12_L  | 10 | 1  | 1  | 93,379,387 | 75,225,543  | 1p22.1   | 1p31.1   |
| LU12_L  | 7  | 1  | 1  | 93,488,994 | 82,128,745  | 1p22.1   | 1p31.1   |
| LU12_L  | 5  | 1  | 1  | 93,496,158 | 86,726,659  | 1p22.1   | 1p22.3   |
| LU12_L  | 9  | 1  | 1  | 93,502,296 | 95,816,856  | 1p22.1   | 1p21.3   |
| LU18_AD | 3  | 9  | 4  | 93,504,404 | 4,175,441   | 9q22.2   | 4p16.3   |
| LU7_L   | 4  | 9  | 11 | 93,517,174 | 71,326,499  | 9q22.2   | 11q13.4  |
| LU11_AD | 3  | 9  | 4  | 93,517,987 | 9,512,034   | 9q22.2   | 4p16.1   |
| LU20_AD | 3  | 6  | 6  | 93,553,318 | 93,586,531  | 6q16.1   | 6q16.1   |
| LU4_AD  | 3  | 12 | 12 | 93,571,712 | 93,604,354  | 12q22    | 12q22    |
| LU12_L  | 4  | 1  | 1  | 93,576,738 | 82,065,382  | 1p22.1   | 1p31.1   |
| LU12_L  | 11 | 1  | 1  | 93,577,704 | 85,933,855  | 1p22.1   | 1p22.3   |
| LU20_AD | 3  | 6  | 6  | 93,586,531 | 93,553,318  | 6q16.1   | 6q16.1   |
| LU12_L  | 12 | 1  | 1  | 93,597,375 | 102,933,265 | 1p22.1   | 1p21.1   |
| LU8_L   | 6  | 11 | 12 | 93,601,689 | 88,622,590  | 11q21    | 12q21.32 |

|         |    |    |    |            |             |         |         |
|---------|----|----|----|------------|-------------|---------|---------|
| LU4_AD  | 3  | 12 | 12 | 93,604,354 | 93,571,712  | 12q22   | 12q22   |
| LU12_L  | 11 | 1  | 1  | 93,642,323 | 106,299,328 | 1p22.1  | 1p21.1  |
| LU12_L  | 3  | 1  | 1  | 93,646,557 | 85,482,628  | 1p22.1  | 1p22.3  |
| LU12_L  | 16 | 1  | 1  | 93,675,610 | 104,108,639 | 1p22.1  | 1p21.1  |
| LU14_AD | 3  | 5  | 13 | 93,683,125 | 35,320,850  | 5q15    | 13q13.2 |
| LU12_L  | 4  | 1  | 1  | 93,698,765 | 85,302,551  | 1p22.1  | 1p22.3  |
| LU20_AD | 4  | 13 | 11 | 93,746,063 | 43,177,546  | 13q31.3 | 11p12   |
| LU12_L  | 5  | 1  | 1  | 93,747,296 | 100,671,986 | 1p22.1  | 1p21.2  |
| LU18_AD | 4  | 13 | 12 | 93,748,243 | 59,928,682  | 13q31.3 | 12q14.1 |
| LU12_L  | 5  | 1  | 1  | 93,781,064 | 77,520,744  | 1p22.1  | 1p31.1  |
| LU12_L  | 10 | 1  | 1  | 93,786,261 | 99,459,542  | 1p22.1  | 1p21.3  |
| LU12_L  | 7  | 1  | 1  | 93,788,360 | 109,543,198 | 1p22.1  | 1p13.3  |
| LU12_L  | 12 | 1  | 1  | 93,831,427 | 91,663,493  | 1p22.1  | 1p22.2  |
| LU12_L  | 7  | 1  | 1  | 93,836,055 | 91,040,716  | 1p22.1  | 1p22.2  |
| LU12_L  | 9  | 1  | 1  | 93,837,181 | 102,676,951 | 1p22.1  | 1p21.1  |
| LU12_L  | 10 | 1  | 1  | 93,839,370 | 73,379,044  | 1p22.1  | 1p31.1  |
| LU12_L  | 7  | 1  | 1  | 93,842,797 | 102,709,444 | 1p22.1  | 1p21.1  |
| LU3_AD  | 3  | 11 | 23 | 93,850,323 | 105,427,426 | 11q21   | Xq22.3  |
| LU14_AD | 4  | 11 | 2  | 93,855,994 | 135,564,007 | 11q21   | 2q21.3  |
| LU12_L  | 12 | 1  | 1  | 93,880,801 | 75,617,661  | 1p22.1  | 1p31.1  |
| LU21_AD | 10 | 8  | 8  | 93,919,641 | 93,949,546  | 8q22.1  | 8q22.1  |
| LU12_L  | 5  | 1  | 1  | 93,922,460 | 94,607,238  | 1p22.1  | 1p22.1  |
| LU12_L  | 7  | 1  | 1  | 93,923,727 | 95,181,967  | 1p22.1  | 1p21.3  |
| LU12_L  | 6  | 1  | 1  | 93,935,925 | 100,040,189 | 1p22.1  | 1p21.2  |
| LU21_AD | 10 | 8  | 8  | 93,949,546 | 93,919,641  | 8q22.1  | 8q22.1  |
| LU4_L   | 3  | 3  | 3  | 93,967,830 | 94,000,324  | 3q11.2  | 3q11.2  |
| LU12_L  | 8  | 1  | 1  | 93,971,649 | 74,216,241  | 1p22.1  | 1p31.1  |
| LU4_L   | 3  | 3  | 3  | 94,000,324 | 93,967,830  | 3q11.2  | 3q11.2  |
| LU18_AD | 3  | 11 | 1  | 94,080,028 | 99,272,982  | 11q21   | 1p21.3  |
| LU12_L  | 3  | 11 | 8  | 94,085,245 | 138,423,848 | 11q21   | 8q24.23 |
| LU12_L  | 9  | 1  | 1  | 94,095,355 | 88,887,926  | 1p22.1  | 1p22.2  |
| LU12_L  | 6  | 1  | 1  | 94,097,312 | 76,881,405  | 1p22.1  | 1p31.1  |
| LU12_L  | 4  | 1  | 1  | 94,097,347 | 73,491,754  | 1p22.1  | 1p31.1  |
| LU12_L  | 4  | 1  | 1  | 94,100,145 | 100,766,217 | 1p22.1  | 1p21.2  |
| LU4_AD  | 3  | 3  | 3  | 94,102,915 | 94,136,616  | 3q11.2  | 3q11.2  |
| LU4_AD  | 3  | 3  | 3  | 94,136,616 | 94,102,915  | 3q11.2  | 3q11.2  |
| LU5_L   | 3  | 12 | 13 | 94,222,530 | 110,828,751 | 12q22   | 13q34   |
| LU8_L   | 5  | 1  | 13 | 94,283,474 | 57,144,496  | 1p22.1  | 13q21.1 |
| LU12_L  | 5  | 1  | 1  | 94,284,389 | 85,597,532  | 1p22.1  | 1p22.3  |
| LU12_L  | 7  | 1  | 1  | 94,305,322 | 109,375,464 | 1p22.1  | 1p13.3  |
| LU12_L  | 14 | 1  | 1  | 94,331,928 | 87,801,201  | 1p22.1  | 1p22.3  |
| LU12_L  | 4  | 1  | 1  | 94,340,113 | 88,491,689  | 1p22.1  | 1p22.2  |
| LU4_AD  | 3  | 23 | 23 | 94,347,348 | 94,384,439  | Xq21.33 | Xq21.33 |
| LU21_AD | 3  | 7  | 4  | 94,351,791 | 127,055,515 | 7q21.3  | 4q28.1  |



|         |    |    |    |            |             |          |          |
|---------|----|----|----|------------|-------------|----------|----------|
| LU4_AD  | 3  | 23 | 23 | 94,384,439 | 94,347,348  | Xq21.33  | Xq21.33  |
| LU12_L  | 6  | 1  | 1  | 94,412,091 | 81,271,229  | 1p22.1   | 1p31.1   |
| LU12_L  | 10 | 1  | 1  | 94,489,968 | 96,816,805  | 1p22.1   | 1p21.3   |
| LU12_L  | 8  | 1  | 1  | 94,503,937 | 88,521,631  | 1p22.1   | 1p22.2   |
| LU12_L  | 11 | 1  | 1  | 94,533,360 | 79,864,247  | 1p22.1   | 1p31.1   |
| LU11_AD | 3  | 12 | 11 | 94,534,600 | 63,679,813  | 12q22    | 11q13.1  |
| LU12_L  | 5  | 1  | 1  | 94,607,238 | 93,922,460  | 1p22.1   | 1p22.1   |
| LU18_AD | 3  | 11 | 7  | 94,647,693 | 132,853,315 | 11q21    | 7q33     |
| LU12_L  | 7  | 1  | 1  | 94,650,302 | 96,743,803  | 1p22.1   | 1p21.3   |
| LU4_AD  | 3  | 23 | 23 | 94,654,538 | 94,691,674  | Xq21.33  | Xq21.33  |
| LU4_AD  | 3  | 23 | 23 | 94,691,674 | 94,654,538  | Xq21.33  | Xq21.33  |
| LU18_AD | 3  | 1  | 1  | 94,691,879 | 94,750,292  | 1p22.1   | 1p21.3   |
| LU3_AD  | 3  | 23 | 14 | 94,717,265 | 88,276,305  | Xq21.33  | 14q31.3  |
| LU15_L  | 6  | 12 | 5  | 94,750,216 | 121,192,414 | 12q22    | 5q23.1   |
| LU18_AD | 3  | 1  | 1  | 94,750,292 | 94,691,879  | 1p21.3   | 1p22.1   |
| LU18_AD | 3  | 12 | 4  | 94,751,095 | 185,972,053 | 12q22    | 4q35.1   |
| LU14_L  | 12 | 14 | 14 | 94,814,029 | 96,445,254  | 14q32.13 | 14q32.2  |
| LU14_AD | 10 | 14 | 14 | 94,814,752 | 96,445,533  | 14q32.13 | 14q32.2  |
| LU3_L   | 3  | 15 | 15 | 94,827,280 | 94,865,634  | 15q26.2  | 15q26.2  |
| LU12_L  | 16 | 8  | 8  | 94,856,218 | 108,614,004 | 8q22.1   | 8q23.1   |
| LU3_L   | 3  | 15 | 15 | 94,865,634 | 94,827,280  | 15q26.2  | 15q26.2  |
| LU18_L  | 3  | 1  | 3  | 94,912,154 | 184,734,715 | 1p21.3   | 3q27.2   |
| LU12_L  | 4  | 10 | 22 | 94,936,131 | 18,878,228  | 10q23.33 | 22q11.21 |
| LU14_L  | 5  | 14 | 15 | 94,957,196 | 64,502,346  | 14q32.13 | 15q22.31 |
| LU14_AD | 8  | 14 | 15 | 94,958,110 | 64,502,086  | 14q32.13 | 15q22.31 |
| LU14_L  | 10 | 14 | 14 | 94,961,627 | 94,815,797  | 14q32.13 | 14q32.13 |
| LU14_AD | 10 | 14 | 14 | 94,962,623 | 94,816,150  | 14q32.13 | 14q32.13 |
| LU4_AD  | 4  | 10 | 14 | 94,990,957 | 41,705,124  | 10q23.33 | 14q21.1  |
| LU8_AD  | 4  | 11 | 1  | 95,041,453 | 55,374,384  | 11q21    | 1p32.3   |
| LU12_L  | 3  | 5  | 6  | 95,047,175 | 87,185,142  | 5q15     | 6q14.3   |
| LU20_L  | 3  | 11 | 11 | 95,048,664 | 95,080,069  | 11q21    | 11q21    |
| LU12_L  | 7  | 1  | 1  | 95,077,903 | 95,199,483  | 1p21.3   | 1p21.3   |
| LU20_L  | 3  | 11 | 11 | 95,080,069 | 95,048,664  | 11q21    | 11q21    |
| LU12_L  | 5  | 1  | 1  | 95,098,487 | 107,690,380 | 1p21.3   | 1p13.3   |
| LU12_L  | 10 | 1  | 1  | 95,100,323 | 96,863,479  | 1p21.3   | 1p21.3   |
| LU12_L  | 8  | 1  | 1  | 95,131,178 | 86,063,608  | 1p21.3   | 1p22.3   |
| LU12_L  | 6  | 1  | 1  | 95,144,804 | 99,566,681  | 1p21.3   | 1p21.3   |
| LU12_L  | 13 | 1  | 1  | 95,156,569 | 88,459,805  | 1p21.3   | 1p22.2   |
| LU12_L  | 7  | 1  | 1  | 95,181,967 | 93,923,727  | 1p21.3   | 1p22.1   |
| LU12_L  | 7  | 1  | 1  | 95,197,167 | 75,172,853  | 1p21.3   | 1p31.1   |
| LU14_L  | 3  | 14 | 5  | 95,199,013 | 2,473,953   | 14q32.13 | 5p15.33  |
| LU12_L  | 7  | 1  | 1  | 95,199,483 | 95,077,903  | 1p21.3   | 1p21.3   |
| LU14_AD | 4  | 14 | 5  | 95,200,473 | 2,473,432   | 14q32.13 | 5p15.33  |
| LU14_AD | 12 | 14 | 14 | 95,203,792 | 96,451,251  | 14q32.13 | 14q32.2  |

|         |    |    |    |            |             |          |          |
|---------|----|----|----|------------|-------------|----------|----------|
| LU14_L  | 22 | 14 | 14 | 95,204,198 | 96,450,489  | 14q32.13 | 14q32.2  |
| LU12_L  | 4  | 4  | 1  | 95,218,766 | 55,490,973  | 4q22.3   | 1p32.3   |
| LU12_L  | 4  | 1  | 1  | 95,233,937 | 85,965,460  | 1p21.3   | 1p22.3   |
| LU12_L  | 4  | 1  | 1  | 95,248,275 | 76,623,782  | 1p21.3   | 1p31.1   |
| LU12_L  | 4  | 1  | 1  | 95,251,892 | 75,672,611  | 1p21.3   | 1p31.1   |
| LU11_AD | 3  | 9  | 6  | 95,285,522 | 27,155,360  | 9q22.31  | 6p22.1   |
| LU4_AD  | 5  | 8  | 8  | 95,324,144 | 95,358,636  | 8q22.1   | 8q22.1   |
| LU21_AD | 5  | 7  | 7  | 95,334,196 | 95,380,430  | 7q21.3   | 7q21.3   |
| LU12_L  | 9  | 1  | 1  | 95,334,992 | 107,974,197 | 1p21.3   | 1p13.3   |
| LU20_L  | 4  | 11 | 5  | 95,344,208 | 53,647,566  | 11q21    | 5q11.2   |
| LU12_L  | 5  | 1  | 1  | 95,344,262 | 104,493,882 | 1p21.3   | 1p21.1   |
| LU12_L  | 20 | 1  | 1  | 95,352,590 | 82,304,737  | 1p21.3   | 1p31.1   |
| LU4_AD  | 5  | 8  | 8  | 95,358,636 | 95,324,144  | 8q22.1   | 8q22.1   |
| LU12_L  | 6  | 1  | 1  | 95,368,662 | 101,177,335 | 1p21.3   | 1p21.2   |
| LU21_AD | 5  | 7  | 7  | 95,380,430 | 95,334,196  | 7q21.3   | 7q21.3   |
| LU12_L  | 19 | 1  | 1  | 95,388,236 | 76,627,487  | 1p21.3   | 1p31.1   |
| LU4_AD  | 13 | 23 | 5  | 95,389,614 | 58,705,286  | Xq21.33  | 5q11.2   |
| LU12_L  | 4  | 1  | 1  | 95,396,579 | 83,304,450  | 1p21.3   | 1p31.1   |
| LU12_L  | 11 | 1  | 1  | 95,406,419 | 95,550,444  | 1p21.3   | 1p21.3   |
| LU11_AD | 4  | 1  | 1  | 95,424,411 | 6,252,915   | 1p21.3   | 1p36.31  |
| LU12_L  | 4  | 1  | 1  | 95,427,228 | 78,773,927  | 1p21.3   | 1p31.1   |
| LU3_AD  | 3  | 8  | 8  | 95,428,745 | 95,462,421  | 8q22.1   | 8q22.1   |
| LU12_L  | 5  | 1  | 1  | 95,451,406 | 86,983,571  | 1p21.3   | 1p22.3   |
| LU3_AD  | 3  | 8  | 8  | 95,462,421 | 95,428,745  | 8q22.1   | 8q22.1   |
| LU12_L  | 11 | 1  | 1  | 95,469,247 | 105,241,062 | 1p21.3   | 1p21.1   |
| LU12_L  | 5  | 1  | 1  | 95,472,791 | 103,085,497 | 1p21.3   | 1p21.1   |
| LU8_L   | 3  | 2  | 9  | 95,494,920 | 67,288,194  | 2q11.1   | 9q13     |
| LU18_L  | 6  | 2  | 9  | 95,495,344 | 67,286,415  | 2q11.1   | 9q13     |
| LU6_L   | 4  | 2  | 9  | 95,495,439 | 67,287,661  | 2q11.1   | 9q13     |
| LU8_L   | 3  | 2  | 9  | 95,495,439 | 33,400,885  | 2q11.1   | 9p13.3   |
| LU12_L  | 15 | 1  | 1  | 95,524,191 | 86,842,116  | 1p21.3   | 1p22.3   |
| LU12_L  | 11 | 1  | 1  | 95,550,444 | 95,406,419  | 1p21.3   | 1p21.3   |
| LU12_L  | 11 | 1  | 1  | 95,615,580 | 100,799,521 | 1p21.3   | 1p21.2   |
| LU20_AD | 3  | 2  | 2  | 95,660,622 | 110,843,505 | 2q11.1   | 2q13     |
| LU21_AD | 4  | 11 | 6  | 95,665,656 | 23,162,878  | 11q21    | 6p22.3   |
| LU12_L  | 8  | 1  | 1  | 95,741,177 | 75,875,860  | 1p21.3   | 1p31.1   |
| LU12_L  | 6  | 1  | 1  | 95,790,930 | 76,329,878  | 1p21.3   | 1p31.1   |
| LU12_L  | 5  | 1  | 1  | 95,799,192 | 85,152,474  | 1p21.3   | 1p22.3   |
| LU18_L  | 4  | 8  | 7  | 95,802,166 | 91,586,150  | 8q22.1   | 7q21.2   |
| LU12_L  | 9  | 1  | 1  | 95,813,077 | 85,314,986  | 1p21.3   | 1p22.3   |
| LU12_L  | 9  | 1  | 1  | 95,816,856 | 93,502,296  | 1p21.3   | 1p22.1   |
| LU3_L   | 3  | 12 | 6  | 95,843,079 | 64,740,316  | 12q22    | 6q12     |
| LU16_AD | 3  | 12 | 12 | 95,844,159 | 82,295,187  | 12q22    | 12q21.31 |
| LU4_L   | 3  | 4  | 4  | 95,844,345 | 95,874,025  | 4q22.3   | 4q22.3   |

|         |    |    |    |            |             |          |          |
|---------|----|----|----|------------|-------------|----------|----------|
| LU12_L  | 9  | 1  | 1  | 95,868,980 | 107,228,123 | 1p21.3   | 1p13.3   |
| LU4_L   | 3  | 4  | 4  | 95,874,025 | 95,844,345  | 4q22.3   | 4q22.3   |
| LU12_L  | 16 | 1  | 1  | 95,902,063 | 73,585,721  | 1p21.3   | 1p31.1   |
| LU12_L  | 6  | 1  | 1  | 95,924,563 | 96,733,229  | 1p21.3   | 1p21.3   |
| LU8_L   | 3  | 2  | 2  | 95,972,032 | 96,005,482  | 2q11.1   | 2q11.1   |
| LU8_L   | 3  | 2  | 2  | 96,005,482 | 95,972,032  | 2q11.1   | 2q11.1   |
| LU12_L  | 4  | 1  | 1  | 96,016,203 | 92,530,501  | 1p21.3   | 1p22.1   |
| LU12_L  | 3  | 1  | 1  | 96,016,588 | 86,997,896  | 1p21.3   | 1p22.3   |
| LU12_L  | 11 | 1  | 1  | 96,023,137 | 106,337,587 | 1p21.3   | 1p21.1   |
| LU12_L  | 8  | 1  | 1  | 96,025,741 | 100,043,509 | 1p21.3   | 1p21.2   |
| LU12_L  | 8  | 1  | 1  | 96,059,508 | 74,822,838  | 1p21.3   | 1p31.1   |
| LU12_L  | 5  | 1  | 1  | 96,072,363 | 82,547,815  | 1p21.3   | 1p31.1   |
| LU16_AD | 5  | 5  | 17 | 96,094,682 | 14,084,482  | 5q15     | 17p12    |
| LU12_L  | 11 | 1  | 1  | 96,160,530 | 90,729,745  | 1p21.3   | 1p22.2   |
| LU3_L   | 3  | 14 | 14 | 96,182,370 | 96,231,403  | 14q32.13 | 14q32.13 |
| LU4_L   | 3  | 23 | 23 | 96,186,963 | 96,224,449  | Xq21.33  | Xq21.33  |
| LU4_L   | 3  | 23 | 23 | 96,224,449 | 96,186,963  | Xq21.33  | Xq21.33  |
| LU3_L   | 3  | 14 | 14 | 96,231,403 | 96,182,370  | 14q32.13 | 14q32.13 |
| LU3_L   | 5  | 9  | 9  | 96,272,756 | 96,303,299  | 9q22.31  | 9q22.31  |
| LU8_L   | 3  | 2  | 11 | 96,291,339 | 89,486,392  | 2q11.1   | 11q14.3  |
| LU3_L   | 5  | 9  | 9  | 96,303,299 | 96,272,756  | 9q22.31  | 9q22.31  |
| LU21_L  | 3  | 2  | 11 | 96,304,641 | 89,468,648  | 2q11.1   | 11q14.3  |
| LU16_L  | 3  | 3  | 11 | 96,336,024 | 10,529,558  | 3q11.2   | 11p15.4  |
| LU12_L  | 7  | 1  | 1  | 96,337,557 | 99,572,127  | 1p21.3   | 1p21.3   |
| LU5_AD  | 4  | 3  | 3  | 96,375,617 | 96,407,665  | 3q11.2   | 3q11.2   |
| LU18_L  | 3  | 3  | 18 | 96,386,150 | 47,974,247  | 3q11.2   | 18q21.1  |
| LU4_AD  | 4  | 3  | 23 | 96,386,438 | 79,214,828  | 3q11.2   | Xq21.1   |
| LU5_AD  | 4  | 3  | 3  | 96,407,665 | 96,375,617  | 3q11.2   | 3q11.2   |
| LU12_L  | 5  | 1  | 1  | 96,408,464 | 100,186,487 | 1p21.3   | 1p21.2   |
| LU4_AD  | 5  | 23 | 5  | 96,419,351 | 56,874,203  | Xq21.33  | 5q11.2   |
| LU12_L  | 3  | 14 | 14 | 96,428,100 | 96,458,247  | 14q32.2  | 14q32.2  |
| LU14_L  | 12 | 14 | 14 | 96,445,254 | 94,814,029  | 14q32.2  | 14q32.13 |
| LU14_AD | 10 | 14 | 14 | 96,445,533 | 94,814,752  | 14q32.2  | 14q32.13 |
| LU12_L  | 11 | 1  | 1  | 96,449,103 | 74,566,756  | 1p21.3   | 1p31.1   |
| LU14_L  | 22 | 14 | 14 | 96,450,489 | 95,204,198  | 14q32.2  | 14q32.13 |
| LU14_AD | 12 | 14 | 14 | 96,451,251 | 95,203,792  | 14q32.2  | 14q32.13 |
| LU3_L   | 3  | 11 | 2  | 96,455,541 | 173,407,147 | 11q21    | 2q31.1   |
| LU12_L  | 3  | 14 | 14 | 96,458,247 | 96,428,100  | 14q32.2  | 14q32.2  |
| LU12_L  | 7  | 1  | 1  | 96,462,184 | 88,930,631  | 1p21.3   | 1p22.2   |
| LU4_AD  | 3  | 15 | 15 | 96,498,997 | 96,529,976  | 15q26.2  | 15q26.2  |
| LU8_AD  | 3  | 5  | 5  | 96,504,058 | 96,536,572  | 5q15     | 5q15     |
| LU20_L  | 3  | 9  | 5  | 96,516,455 | 51,602,150  | 9q22.31  | 5q11.2   |
| LU12_L  | 6  | 1  | 1  | 96,527,183 | 82,337,202  | 1p21.3   | 1p31.1   |
| LU4_AD  | 3  | 15 | 15 | 96,529,976 | 96,498,997  | 15q26.2  | 15q26.2  |

|         |    |    |    |            |             |         |         |
|---------|----|----|----|------------|-------------|---------|---------|
| LU8_AD  | 3  | 5  | 5  | 96,536,572 | 96,504,058  | 5q15    | 5q15    |
| LU12_L  | 7  | 1  | 1  | 96,576,182 | 107,463,135 | 1p21.3  | 1p13.3  |
| LU12_L  | 12 | 1  | 1  | 96,580,006 | 76,041,446  | 1p21.3  | 1p31.1  |
| LU12_L  | 10 | 1  | 1  | 96,594,117 | 76,295,847  | 1p21.3  | 1p31.1  |
| LU4_AD  | 4  | 1  | 3  | 96,613,516 | 73,200,005  | 1p21.3  | 3p13    |
| LU3_L   | 3  | 5  | 13 | 96,646,444 | 111,847,040 | 5q15    | 13q34   |
| LU12_L  | 3  | 5  | 12 | 96,647,295 | 107,608,536 | 5q15    | 12q23.3 |
| LU21_L  | 4  | 5  | 11 | 96,649,233 | 85,323,933  | 5q15    | 11q14.1 |
| LU18_AD | 4  | 5  | 6  | 96,650,465 | 64,737,719  | 5q15    | 6q12    |
| LU12_L  | 9  | 1  | 1  | 96,682,961 | 107,692,658 | 1p21.3  | 1p13.3  |
| LU12_L  | 9  | 1  | 1  | 96,689,008 | 89,067,918  | 1p21.3  | 1p22.2  |
| LU12_L  | 26 | 8  | 8  | 96,697,200 | 134,969,144 | 8q22.1  | 8q24.22 |
| LU12_L  | 19 | 8  | 8  | 96,702,977 | 133,274,777 | 8q22.1  | 8q24.22 |
| LU12_L  | 6  | 1  | 1  | 96,733,229 | 95,924,563  | 1p21.3  | 1p21.3  |
| LU12_L  | 7  | 1  | 1  | 96,738,718 | 109,463,965 | 1p21.3  | 1p13.3  |
| LU12_L  | 7  | 1  | 1  | 96,743,803 | 94,650,302  | 1p21.3  | 1p22.1  |
| LU12_L  | 7  | 1  | 1  | 96,754,665 | 83,303,536  | 1p21.3  | 1p31.1  |
| LU12_L  | 14 | 1  | 1  | 96,763,278 | 88,863,931  | 1p21.3  | 1p22.2  |
| LU12_L  | 7  | 1  | 1  | 96,781,232 | 98,468,141  | 1p21.3  | 1p21.3  |
| LU12_L  | 9  | 1  | 1  | 96,788,450 | 79,807,611  | 1p21.3  | 1p31.1  |
| LU5_L   | 3  | 11 | 11 | 96,813,119 | 96,843,170  | 11q21   | 11q21   |
| LU12_L  | 10 | 1  | 1  | 96,816,805 | 94,489,968  | 1p21.3  | 1p22.1  |
| LU12_L  | 13 | 1  | 1  | 96,823,140 | 109,446,540 | 1p21.3  | 1p13.3  |
| LU12_L  | 9  | 1  | 1  | 96,838,801 | 101,203,451 | 1p21.3  | 1p21.2  |
| LU5_L   | 3  | 11 | 11 | 96,843,170 | 96,813,119  | 11q21   | 11q21   |
| LU20_AD | 3  | 15 | 15 | 96,855,620 | 96,888,564  | 15q26.2 | 15q26.2 |
| LU12_L  | 6  | 1  | 1  | 96,863,234 | 77,799,373  | 1p21.3  | 1p31.1  |
| LU12_L  | 10 | 1  | 1  | 96,863,479 | 95,100,323  | 1p21.3  | 1p21.3  |
| LU20_AD | 3  | 15 | 15 | 96,888,564 | 96,855,620  | 15q26.2 | 15q26.2 |
| LU12_L  | 4  | 1  | 1  | 96,902,785 | 89,105,491  | 1p21.3  | 1p22.2  |
| LU11_AD | 8  | 15 | 10 | 96,908,770 | 101,598,851 | 15q26.2 | 10q24.2 |
| LU12_L  | 7  | 1  | 1  | 96,938,289 | 107,484,055 | 1p21.3  | 1p13.3  |
| LU12_L  | 10 | 1  | 1  | 96,967,334 | 81,228,497  | 1p21.3  | 1p31.1  |
| LU4_AD  | 4  | 23 | 6  | 96,971,229 | 20,312,318  | Xq21.33 | 6p22.3  |
| LU12_L  | 9  | 1  | 1  | 96,972,984 | 108,343,202 | 1p21.3  | 1p13.3  |
| LU18_AD | 8  | 5  | 5  | 97,033,313 | 17,705,214  | 5q15    | 5p15.1  |
| LU18_L  | 6  | 5  | 5  | 97,033,966 | 17,706,155  | 5q15    | 5p15.1  |
| LU12_L  | 9  | 1  | 1  | 97,093,462 | 89,885,846  | 1p21.3  | 1p22.2  |
| LU12_L  | 13 | 1  | 1  | 97,093,527 | 88,759,809  | 1p21.3  | 1p22.2  |
| LU12_L  | 6  | 1  | 1  | 97,100,967 | 75,159,141  | 1p21.3  | 1p31.1  |
| LU12_L  | 3  | 1  | 1  | 97,127,407 | 85,442,939  | 1p21.3  | 1p22.3  |
| LU12_L  | 5  | 1  | 1  | 97,154,074 | 75,612,790  | 1p21.3  | 1p31.1  |
| LU12_L  | 7  | 1  | 1  | 97,191,116 | 106,886,289 | 1p21.3  | 1p21.1  |
| LU5_AD  | 3  | 1  | 1  | 97,211,881 | 97,245,778  | 1p21.3  | 1p21.3  |

|         |    |    |    |            |             |         |          |
|---------|----|----|----|------------|-------------|---------|----------|
| LU12_L  | 12 | 8  | 8  | 97,215,775 | 47,667,475  | 8q22.1  | 8q11.1   |
| LU12_L  | 47 | 8  | 8  | 97,220,063 | 72,983,719  | 8q22.1  | 8q13.3   |
| LU12_L  | 11 | 1  | 1  | 97,226,733 | 74,257,154  | 1p21.3  | 1p31.1   |
| LU5_AD  | 3  | 1  | 1  | 97,245,778 | 97,211,881  | 1p21.3  | 1p21.3   |
| LU7_L   | 16 | 8  | 12 | 97,264,222 | 71,439,627  | 8q22.1  | 12q15    |
| LU12_L  | 10 | 1  | 1  | 97,304,187 | 102,906,037 | 1p21.3  | 1p21.1   |
| LU12_L  | 9  | 1  | 1  | 97,309,756 | 80,951,507  | 1p21.3  | 1p31.1   |
| LU12_L  | 9  | 1  | 1  | 97,311,426 | 87,347,258  | 1p21.3  | 1p22.3   |
| LU12_L  | 9  | 1  | 1  | 97,358,316 | 99,916,440  | 1p21.3  | 1p21.2   |
| LU12_L  | 8  | 1  | 1  | 97,365,842 | 85,229,823  | 1p21.3  | 1p22.3   |
| LU12_L  | 7  | 1  | 1  | 97,368,243 | 103,452,646 | 1p21.3  | 1p21.1   |
| LU12_L  | 11 | 1  | 1  | 97,392,347 | 86,650,580  | 1p21.3  | 1p22.3   |
| LU8_AD  | 3  | 5  | 4  | 97,412,977 | 92,546,431  | 5q15    | 4q22.1   |
| LU20_AD | 3  | 5  | 11 | 97,420,142 | 121,510,179 | 5q15    | 11q24.1  |
| LU12_L  | 7  | 1  | 1  | 97,435,327 | 102,461,359 | 1p21.3  | 1p21.1   |
| LU12_L  | 9  | 1  | 1  | 97,454,693 | 107,487,533 | 1p21.3  | 1p13.3   |
| LU12_L  | 3  | 1  | 1  | 97,462,196 | 86,520,747  | 1p21.3  | 1p22.3   |
| LU12_L  | 4  | 1  | 1  | 97,488,879 | 86,412,851  | 1p21.3  | 1p22.3   |
| LU8_L   | 4  | 1  | 13 | 97,499,409 | 50,225,512  | 1p21.3  | 13q14.2  |
| LU12_L  | 3  | 1  | 1  | 97,542,122 | 89,856,049  | 1p21.3  | 1p22.2   |
| LU14_L  | 3  | 7  | 2  | 97,571,023 | 135,724,096 | 7q21.3  | 2q21.3   |
| LU12_L  | 10 | 1  | 1  | 97,572,973 | 84,586,483  | 1p21.3  | 1p31.1   |
| LU16_L  | 3  | 7  | 4  | 97,582,299 | 9,455,426   | 7q21.3  | 4p16.1   |
| LU12_L  | 6  | 1  | 1  | 97,592,137 | 84,037,068  | 1p21.3  | 1p31.1   |
| LU12_L  | 5  | 1  | 1  | 97,592,930 | 85,289,944  | 1p21.3  | 1p22.3   |
| LU18_L  | 6  | 5  | 5  | 97,600,581 | 90,045,508  | 5q15    | 5q14.3   |
| LU18_AD | 6  | 5  | 5  | 97,600,829 | 90,044,019  | 5q15    | 5q14.3   |
| LU18_AD | 3  | 14 | 3  | 97,660,380 | 36,506,415  | 14q32.2 | 3p22.2   |
| LU4_AD  | 3  | 10 | 13 | 97,700,364 | 67,166,568  | 10q24.1 | 13q21.32 |
| LU3_AD  | 3  | 11 | 11 | 97,738,298 | 97,769,983  | 11q22.1 | 11q22.1  |
| LU3_AD  | 3  | 11 | 11 | 97,769,983 | 97,738,298  | 11q22.1 | 11q22.1  |
| LU3_AD  | 3  | 5  | 6  | 97,773,596 | 29,217,051  | 5q15    | 6p22.1   |
| LU7_L   | 3  | 13 | 13 | 97,798,659 | 97,829,276  | 13q32.1 | 13q32.1  |
| LU12_L  | 6  | 1  | 1  | 97,805,576 | 98,772,237  | 1p21.3  | 1p21.3   |
| LU12_L  | 5  | 1  | 1  | 97,805,867 | 105,486,624 | 1p21.3  | 1p21.1   |
| LU20_L  | 3  | 3  | 3  | 97,824,286 | 97,863,533  | 3q11.2  | 3q11.2   |
| LU7_L   | 3  | 13 | 13 | 97,829,276 | 97,798,659  | 13q32.1 | 13q32.1  |
| LU3_AD  | 3  | 4  | 4  | 97,845,967 | 97,883,520  | 4q22.3  | 4q22.3   |
| LU20_L  | 3  | 3  | 3  | 97,863,533 | 97,824,286  | 3q11.2  | 3q11.2   |
| LU12_L  | 10 | 1  | 1  | 97,871,373 | 106,297,094 | 1p21.3  | 1p21.1   |
| LU12_L  | 5  | 1  | 1  | 97,874,898 | 102,914,617 | 1p21.3  | 1p21.1   |
| LU3_AD  | 3  | 4  | 4  | 97,883,520 | 97,845,967  | 4q22.3  | 4q22.3   |
| LU18_AD | 4  | 3  | 16 | 97,905,262 | 29,725,762  | 3q11.2  | 16p11.2  |
| LU20_AD | 3  | 3  | 1  | 97,911,418 | 4,246,967   | 3q11.2  | 1p36.32  |

|         |    |    |    |            |             |         |          |
|---------|----|----|----|------------|-------------|---------|----------|
| LU3_L   | 3  | 3  | 5  | 97,911,746 | 121,954,719 | 3q11.2  | 5q23.2   |
| LU8_L   | 5  | 14 | 14 | 97,928,647 | 97,962,003  | 14q32.2 | 14q32.2  |
| LU12_L  | 5  | 1  | 1  | 97,937,235 | 83,052,625  | 1p21.3  | 1p31.1   |
| LU12_L  | 8  | 1  | 1  | 97,944,536 | 103,274,963 | 1p21.3  | 1p21.1   |
| LU12_L  | 5  | 1  | 1  | 97,951,977 | 106,272,069 | 1p21.3  | 1p21.1   |
| LU8_L   | 5  | 14 | 14 | 97,962,003 | 97,928,647  | 14q32.2 | 14q32.2  |
| LU12_L  | 6  | 1  | 1  | 98,085,637 | 107,142,592 | 1p21.3  | 1p21.1   |
| LU12_L  | 7  | 1  | 1  | 98,085,722 | 98,354,009  | 1p21.3  | 1p21.3   |
| LU16_L  | 5  | 1  | 1  | 98,241,142 | 176,620,723 | 1p21.3  | 1q25.2   |
| LU16_AD | 18 | 1  | 1  | 98,241,163 | 176,621,237 | 1p21.3  | 1q25.2   |
| LU12_L  | 16 | 1  | 1  | 98,242,347 | 104,108,169 | 1p21.3  | 1p21.1   |
| LU4_AD  | 3  | 13 | 1  | 98,244,370 | 50,039,829  | 13q32.2 | 1p33     |
| LU16_L  | 5  | 1  | 1  | 98,296,336 | 109,969,104 | 1p21.3  | 1p13.3   |
| LU16_AD | 9  | 1  | 1  | 98,297,652 | 109,968,522 | 1p21.3  | 1p13.3   |
| LU3_L   | 3  | 12 | 12 | 98,337,604 | 98,368,429  | 12q23.1 | 12q23.1  |
| LU12_L  | 7  | 1  | 1  | 98,354,009 | 98,085,722  | 1p21.3  | 1p21.3   |
| LU3_AD  | 3  | 4  | 4  | 98,367,701 | 98,400,237  | 4q22.3  | 4q22.3   |
| LU3_L   | 3  | 12 | 12 | 98,368,429 | 98,337,604  | 12q23.1 | 12q23.1  |
| LU3_AD  | 4  | 1  | 1  | 98,370,239 | 98,401,363  | 1p21.3  | 1p21.3   |
| LU11_AD | 4  | 3  | 8  | 98,379,158 | 87,477,304  | 3q12.1  | 8q21.3   |
| LU12_L  | 7  | 9  | 26 | 98,394,832 | 5,933       | 9q22.32 | 26       |
| LU12_AD | 3  | 9  | 26 | 98,395,959 | 3,715       | 9q22.32 | 26       |
| LU12_L  | 17 | 9  | 26 | 98,399,203 | 13,181      | 9q22.32 | 26       |
| LU12_AD | 14 | 9  | 26 | 98,399,913 | 13,275      | 9q22.32 | 26       |
| LU3_AD  | 3  | 4  | 4  | 98,400,237 | 98,367,701  | 4q22.3  | 4q22.3   |
| LU3_AD  | 4  | 1  | 1  | 98,401,363 | 98,370,239  | 1p21.3  | 1p21.3   |
| LU3_L   | 4  | 2  | 2  | 98,438,710 | 40,896,570  | 2q11.2  | 2p22.1   |
| LU3_L   | 3  | 2  | 23 | 98,439,287 | 70,716,005  | 2q11.2  | Xq13.1   |
| LU12_L  | 7  | 1  | 1  | 98,468,141 | 96,781,232  | 1p21.3  | 1p21.3   |
| LU12_L  | 9  | 1  | 1  | 98,476,719 | 75,434,427  | 1p21.3  | 1p31.1   |
| LU18_AD | 3  | 5  | 16 | 98,529,711 | 14,919,622  | 5q21.1  | 16p13.11 |
| LU18_L  | 6  | 5  | 12 | 98,530,472 | 59,926,642  | 5q21.1  | 12q14.1  |
| LU4_AD  | 3  | 5  | 2  | 98,532,634 | 159,706,535 | 5q21.1  | 2q24.1   |
| LU12_AD | 6  | 15 | 21 | 98,619,945 | 9,915,740   | 15q26.3 | 21p11.2  |
| LU3_AD  | 4  | 9  | 9  | 98,662,838 | 98,693,673  | 9q22.32 | 9q22.32  |
| LU12_L  | 20 | 1  | 1  | 98,673,433 | 107,797,298 | 1p21.3  | 1p13.3   |
| LU11_AD | 4  | 14 | 14 | 98,684,062 | 98,735,423  | 14q32.2 | 14q32.2  |
| LU3_AD  | 4  | 9  | 9  | 98,693,673 | 98,662,838  | 9q22.32 | 9q22.32  |
| LU12_AD | 6  | 15 | 15 | 98,707,714 | 31,837,780  | 15q26.3 | 15q13.3  |
| LU11_AD | 4  | 14 | 14 | 98,735,423 | 98,684,062  | 14q32.2 | 14q32.2  |
| LU12_L  | 9  | 1  | 1  | 98,760,005 | 106,067,225 | 1p21.3  | 1p21.1   |
| LU12_L  | 8  | 1  | 1  | 98,763,303 | 91,958,669  | 1p21.3  | 1p22.2   |
| LU12_L  | 6  | 1  | 1  | 98,772,237 | 97,805,576  | 1p21.3  | 1p21.3   |
| LU12_L  | 10 | 1  | 1  | 98,807,947 | 76,943,529  | 1p21.3  | 1p31.1   |

|         |    |    |    |            |             |         |          |
|---------|----|----|----|------------|-------------|---------|----------|
| LU18_AD | 27 | 8  | 6  | 98,863,550 | 167,333,893 | 8q22.1  | 6q27     |
| LU18_L  | 25 | 8  | 6  | 98,863,763 | 167,334,518 | 8q22.1  | 6q27     |
| LU15_L  | 10 | 9  | 10 | 98,923,174 | 120,042,093 | 9q22.32 | 10q26.11 |
| LU12_L  | 20 | 1  | 1  | 98,963,268 | 79,591,967  | 1p21.3  | 1p31.1   |
| LU11_AD | 4  | 1  | 16 | 98,977,776 | 28,460,259  | 1p21.3  | 16p11.2  |
| LU12_L  | 8  | 1  | 1  | 99,012,370 | 102,219,301 | 1p21.3  | 1p21.1   |
| LU12_L  | 4  | 1  | 1  | 99,117,512 | 106,849,292 | 1p21.3  | 1p21.1   |
| LU3_L   | 4  | 3  | 3  | 99,148,918 | 99,180,824  | 3q12.1  | 3q12.1   |
| LU5_AD  | 3  | 2  | 2  | 99,152,511 | 99,189,551  | 2q11.2  | 2q11.2   |
| LU20_L  | 4  | 14 | 14 | 99,166,842 | 99,216,448  | 14q32.2 | 14q32.2  |
| LU12_L  | 19 | 1  | 1  | 99,172,435 | 87,641,546  | 1p21.3  | 1p22.3   |
| LU3_L   | 4  | 3  | 3  | 99,180,824 | 99,148,918  | 3q12.1  | 3q12.1   |
| LU21_L  | 3  | 7  | 7  | 99,183,099 | 99,560,662  | 7q22.1  | 7q22.1   |
| LU5_AD  | 3  | 2  | 2  | 99,189,551 | 99,152,511  | 2q11.2  | 2q11.2   |
| LU20_L  | 4  | 14 | 14 | 99,216,448 | 99,166,842  | 14q32.2 | 14q32.2  |
| LU12_L  | 9  | 1  | 1  | 99,227,800 | 88,778,759  | 1p21.3  | 1p22.2   |
| LU18_AD | 3  | 1  | 11 | 99,272,982 | 94,080,028  | 1p21.3  | 11q21    |
| LU12_L  | 5  | 1  | 1  | 99,273,660 | 103,371,132 | 1p21.3  | 1p21.1   |
| LU4_L   | 3  | 23 | 23 | 99,304,364 | 99,343,671  | Xq22.1  | Xq22.1   |
| LU4_L   | 3  | 23 | 23 | 99,343,671 | 99,304,364  | Xq22.1  | Xq22.1   |
| LU12_L  | 3  | 1  | 1  | 99,398,405 | 82,853,784  | 1p21.3  | 1p31.1   |
| LU4_AD  | 3  | 13 | 10 | 99,410,223 | 44,090,899  | 13q32.3 | 10q11.21 |
| LU12_L  | 20 | 1  | 1  | 99,414,426 | 74,262,177  | 1p21.3  | 1p31.1   |
| LU12_L  | 10 | 1  | 1  | 99,419,298 | 75,902,112  | 1p21.3  | 1p31.1   |
| LU12_L  | 11 | 1  | 1  | 99,426,165 | 99,486,948  | 1p21.3  | 1p21.3   |
| LU12_L  | 13 | 1  | 1  | 99,441,562 | 99,890,789  | 1p21.3  | 1p21.2   |
| LU12_L  | 10 | 1  | 1  | 99,459,542 | 93,786,261  | 1p21.3  | 1p22.1   |
| LU12_L  | 7  | 1  | 1  | 99,462,417 | 107,044,704 | 1p21.3  | 1p21.1   |
| LU12_L  | 14 | 1  | 1  | 99,468,842 | 91,025,743  | 1p21.3  | 1p22.2   |
| LU12_L  | 11 | 1  | 1  | 99,486,948 | 99,426,165  | 1p21.3  | 1p21.3   |
| LU7_AD  | 6  | 7  | 6  | 99,558,200 | 63,557,035  | 7q22.1  | 6q12     |
| LU21_L  | 3  | 7  | 7  | 99,560,662 | 99,183,099  | 7q22.1  | 7q22.1   |
| LU20_AD | 3  | 7  | 18 | 99,563,127 | 24,465,545  | 7q22.1  | 18q11.2  |
| LU12_L  | 6  | 1  | 1  | 99,566,681 | 95,144,804  | 1p21.3  | 1p21.3   |
| LU12_L  | 7  | 1  | 1  | 99,572,127 | 96,337,557  | 1p21.3  | 1p21.3   |
| LU12_L  | 8  | 1  | 1  | 99,581,245 | 75,627,542  | 1p21.3  | 1p31.1   |
| LU12_L  | 3  | 1  | 1  | 99,585,726 | 105,556,425 | 1p21.3  | 1p21.1   |
| LU3_AD  | 3  | 7  | 7  | 99,605,605 | 99,638,824  | 7q22.1  | 7q22.1   |
| LU3_AD  | 3  | 7  | 7  | 99,638,824 | 99,605,605  | 7q22.1  | 7q22.1   |
| LU11_AD | 3  | 9  | 10 | 99,694,456 | 88,987,027  | 9q22.33 | 10q23.2  |
| LU12_L  | 5  | 1  | 1  | 99,717,231 | 87,451,664  | 1p21.2  | 1p22.3   |
| LU12_L  | 9  | 1  | 1  | 99,718,479 | 88,920,296  | 1p21.2  | 1p22.2   |
| LU21_L  | 5  | 8  | 8  | 99,759,180 | 99,798,053  | 8q22.2  | 8q22.2   |
| LU21_L  | 5  | 8  | 8  | 99,798,053 | 99,759,180  | 8q22.2  | 8q22.2   |

|         |    |    |    |             |             |         |         |
|---------|----|----|----|-------------|-------------|---------|---------|
| LU8_L   | 4  | 2  | 6  | 99,812,670  | 56,895,132  | 2q11.2  | 6p12.1  |
| LU14_L  | 3  | 23 | 5  | 99,823,799  | 129,878,635 | Xq22.1  | 5q23.3  |
| LU3_AD  | 3  | 23 | 1  | 99,824,438  | 71,974,309  | Xq22.1  | 1p31.1  |
| LU20_L  | 4  | 2  | 4  | 99,884,461  | 177,270,599 | 2q11.2  | 4q34.2  |
| LU21_AD | 4  | 2  | 4  | 99,885,184  | 100,408,279 | 2q11.2  | 4q23    |
| LU12_L  | 13 | 1  | 1  | 99,890,789  | 99,441,562  | 1p21.2  | 1p21.3  |
| LU12_L  | 9  | 1  | 1  | 99,912,129  | 80,424,241  | 1p21.2  | 1p31.1  |
| LU12_L  | 9  | 1  | 1  | 99,916,440  | 97,358,316  | 1p21.2  | 1p21.3  |
| LU12_L  | 5  | 1  | 1  | 99,926,694  | 88,100,444  | 1p21.2  | 1p22.3  |
| LU12_L  | 10 | 1  | 1  | 99,944,725  | 108,628,252 | 1p21.2  | 1p13.3  |
| LU12_L  | 11 | 1  | 1  | 99,951,290  | 74,344,084  | 1p21.2  | 1p31.1  |
| LU15_AD | 3  | 4  | 1  | 99,995,054  | 79,987,746  | 4q23    | 1p31.1  |
| LU11_AD | 3  | 8  | 8  | 100,035,475 | 100,083,576 | 8q22.2  | 8q22.2  |
| LU12_L  | 6  | 1  | 1  | 100,040,189 | 93,935,925  | 1p21.2  | 1p22.1  |
| LU12_L  | 8  | 1  | 1  | 100,043,509 | 96,025,741  | 1p21.2  | 1p21.3  |
| LU12_L  | 8  | 1  | 1  | 100,058,938 | 106,301,054 | 1p21.2  | 1p21.1  |
| LU12_L  | 9  | 1  | 1  | 100,060,313 | 88,196,349  | 1p21.2  | 1p22.3  |
| LU11_AD | 3  | 8  | 8  | 100,083,576 | 100,035,475 | 8q22.2  | 8q22.2  |
| LU12_L  | 18 | 1  | 1  | 100,095,269 | 107,890,374 | 1p21.2  | 1p13.3  |
| LU12_L  | 11 | 1  | 1  | 100,099,863 | 88,780,919  | 1p21.2  | 1p22.2  |
| LU12_L  | 12 | 1  | 1  | 100,100,155 | 86,700,539  | 1p21.2  | 1p22.3  |
| LU12_AD | 4  | 4  | 8  | 100,107,686 | 39,730,930  | 4q23    | 8p11.21 |
| LU12_L  | 9  | 1  | 1  | 100,167,335 | 109,894,766 | 1p21.2  | 1p13.3  |
| LU12_L  | 5  | 1  | 1  | 100,186,487 | 96,408,464  | 1p21.2  | 1p21.3  |
| LU12_L  | 28 | 1  | 1  | 100,247,500 | 74,860,712  | 1p21.2  | 1p31.1  |
| LU12_L  | 11 | 1  | 1  | 100,303,275 | 74,654,459  | 1p21.2  | 1p31.1  |
| LU12_L  | 8  | 1  | 1  | 100,307,973 | 88,172,263  | 1p21.2  | 1p22.3  |
| LU18_L  | 3  | 15 | 15 | 100,333,770 | 28,946,196  | 15q26.3 | 15q13.1 |
| LU12_L  | 7  | 1  | 1  | 100,347,708 | 108,645,357 | 1p21.2  | 1p13.3  |
| LU21_AD | 3  | 11 | 11 | 100,357,561 | 100,388,379 | 11q22.1 | 11q22.1 |
| LU21_AD | 3  | 11 | 11 | 100,388,379 | 100,357,561 | 11q22.1 | 11q22.1 |
| LU21_AD | 4  | 4  | 2  | 100,408,279 | 99,885,184  | 4q23    | 2q11.2  |
| LU12_AD | 3  | 4  | 4  | 100,408,442 | 35,145,340  | 4q23    | 4p15.1  |
| LU12_L  | 3  | 1  | 1  | 100,425,043 | 78,593,893  | 1p21.2  | 1p31.1  |
| LU6_AD  | 3  | 23 | 6  | 100,438,364 | 32,525,455  | Xq22.1  | 6p21.32 |
| LU3_AD  | 5  | 8  | 8  | 100,482,474 | 100,512,623 | 8q22.2  | 8q22.2  |
| LU12_L  | 3  | 1  | 1  | 100,490,822 | 101,717,615 | 1p21.2  | 1p21.2  |
| LU3_AD  | 5  | 8  | 8  | 100,512,623 | 100,482,474 | 8q22.2  | 8q22.2  |
| LU12_L  | 9  | 1  | 1  | 100,532,502 | 83,053,372  | 1p21.2  | 1p31.1  |
| LU7_AD  | 5  | 5  | 5  | 100,593,395 | 72,138,954  | 5q21.1  | 5q13.2  |
| LU7_L   | 9  | 5  | 5  | 100,596,822 | 72,135,956  | 5q21.1  | 5q13.2  |
| LU12_L  | 4  | 1  | 1  | 100,621,526 | 104,446,320 | 1p21.2  | 1p21.1  |
| LU12_L  | 5  | 1  | 1  | 100,671,986 | 93,747,296  | 1p21.2  | 1p22.1  |
| LU12_L  | 15 | 1  | 1  | 100,672,161 | 84,020,197  | 1p21.2  | 1p31.1  |



|         |    |    |    |             |             |         |         |
|---------|----|----|----|-------------|-------------|---------|---------|
| LU12_L  | 4  | 1  | 1  | 100,766,217 | 94,100,145  | 1p21.2  | 1p22.1  |
| LU20_L  | 3  | 10 | 23 | 100,772,142 | 75,250,527  | 10q24.2 | Xq13.3  |
| LU12_L  | 11 | 1  | 1  | 100,799,521 | 95,615,580  | 1p21.2  | 1p21.3  |
| LU8_AD  | 3  | 10 | 10 | 100,804,280 | 100,857,965 | 10q24.2 | 10q24.2 |
| LU4_L   | 4  | 11 | 14 | 100,846,830 | 19,400,720  | 11q22.1 | 14q11.2 |
| LU18_L  | 4  | 11 | 14 | 100,847,009 | 19,400,241  | 11q22.1 | 14q11.2 |
| LU12_L  | 9  | 1  | 1  | 100,855,114 | 101,045,385 | 1p21.2  | 1p21.2  |
| LU12_L  | 15 | 1  | 1  | 100,857,576 | 91,203,658  | 1p21.2  | 1p22.2  |
| LU8_AD  | 3  | 10 | 10 | 100,857,965 | 100,804,280 | 10q24.2 | 10q24.2 |
| LU4_AD  | 3  | 9  | 9  | 100,877,943 | 100,911,336 | 9q22.33 | 9q22.33 |
| LU4_AD  | 3  | 9  | 9  | 100,911,336 | 100,877,943 | 9q22.33 | 9q22.33 |
| LU20_AD | 9  | 14 | 14 | 100,924,665 | 100,854,358 | 14q32.2 | 14q32.2 |
| LU20_L  | 6  | 14 | 14 | 100,925,440 | 100,854,426 | 14q32.2 | 14q32.2 |
| LU12_L  | 7  | 1  | 1  | 100,939,627 | 109,206,937 | 1p21.2  | 1p13.3  |
| LU12_L  | 13 | 1  | 1  | 100,947,388 | 77,871,309  | 1p21.2  | 1p31.1  |
| LU20_AD | 4  | 4  | 14 | 100,952,226 | 58,189,674  | 4q23    | 14q23.1 |
| LU15_L  | 4  | 10 | 18 | 101,026,518 | 30,082,588  | 10q24.2 | 18q12.1 |
| LU12_L  | 9  | 1  | 1  | 101,033,210 | 101,383,626 | 1p21.2  | 1p21.2  |
| LU12_L  | 9  | 1  | 1  | 101,045,385 | 100,855,114 | 1p21.2  | 1p21.2  |
| LU12_L  | 6  | 1  | 1  | 101,060,876 | 88,629,588  | 1p21.2  | 1p22.2  |
| LU12_L  | 5  | 1  | 1  | 101,076,825 | 76,989,619  | 1p21.2  | 1p31.1  |
| LU12_L  | 7  | 1  | 1  | 101,101,508 | 88,632,946  | 1p21.2  | 1p22.2  |
| LU5_L   | 4  | 11 | 5  | 101,101,925 | 114,331,406 | 11q22.1 | 5q22.3  |
| LU12_AD | 3  | 11 | 6  | 101,102,628 | 151,176,430 | 11q22.1 | 6q25.1  |
| LU20_AD | 4  | 11 | 5  | 101,103,695 | 114,329,531 | 11q22.1 | 5q22.3  |
| LU12_L  | 5  | 1  | 1  | 101,104,565 | 76,785,519  | 1p21.2  | 1p31.1  |
| LU18_L  | 3  | 11 | 5  | 101,105,052 | 114,332,082 | 11q22.1 | 5q22.3  |
| LU12_L  | 3  | 11 | 1  | 101,108,844 | 101,966,536 | 11q22.1 | 1p21.2  |
| LU8_L   | 3  | 11 | 8  | 101,110,155 | 29,165,976  | 11q22.1 | 8p12    |
| LU14_L  | 3  | 11 | 3  | 101,117,062 | 87,788,597  | 11q22.1 | 3p11.2  |
| LU12_L  | 8  | 1  | 1  | 101,119,306 | 78,473,993  | 1p21.2  | 1p31.1  |
| LU12_L  | 6  | 1  | 1  | 101,177,335 | 95,368,662  | 1p21.2  | 1p21.3  |
| LU12_L  | 8  | 1  | 1  | 101,177,916 | 84,253,030  | 1p21.2  | 1p31.1  |
| LU12_L  | 4  | 1  | 1  | 101,178,573 | 93,018,401  | 1p21.2  | 1p22.1  |
| LU6_L   | 6  | 11 | 11 | 101,193,389 | 112,393,785 | 11q22.1 | 11q23.1 |
| LU12_L  | 9  | 1  | 1  | 101,203,451 | 96,838,801  | 1p21.2  | 1p21.3  |
| LU12_L  | 7  | 1  | 1  | 101,321,014 | 77,644,945  | 1p21.2  | 1p31.1  |
| LU12_L  | 11 | 1  | 1  | 101,324,334 | 82,143,441  | 1p21.2  | 1p31.1  |
| LU12_L  | 8  | 1  | 1  | 101,328,506 | 89,129,692  | 1p21.2  | 1p22.2  |
| LU12_L  | 13 | 1  | 1  | 101,345,143 | 77,133,911  | 1p21.2  | 1p31.1  |
| LU3_AD  | 4  | 2  | 2  | 101,351,065 | 101,380,995 | 2q11.2  | 2q11.2  |
| LU20_AD | 3  | 3  | 7  | 101,352,258 | 29,684,296  | 3q12.3  | 7p14.3  |
| LU12_L  | 8  | 1  | 1  | 101,357,944 | 89,172,338  | 1p21.2  | 1p22.2  |
| LU12_L  | 7  | 1  | 1  | 101,371,739 | 89,397,287  | 1p21.2  | 1p22.2  |

|         |    |    |    |             |             |          |          |
|---------|----|----|----|-------------|-------------|----------|----------|
| LU12_L  | 8  | 1  | 1  | 101,373,562 | 81,773,073  | 1p21.2   | 1p31.1   |
| LU3_AD  | 4  | 2  | 2  | 101,380,995 | 101,351,065 | 2q11.2   | 2q11.2   |
| LU12_L  | 9  | 1  | 1  | 101,383,626 | 101,033,210 | 1p21.2   | 1p21.2   |
| LU7_L   | 5  | 3  | 5  | 101,416,320 | 30,492,848  | 3q12.3   | 5p13.3   |
| LU3_L   | 4  | 3  | 5  | 101,416,488 | 30,489,984  | 3q12.3   | 5p13.3   |
| LU5_L   | 5  | 3  | 5  | 101,418,614 | 30,483,511  | 3q12.3   | 5p13.3   |
| LU14_L  | 9  | 9  | 9  | 101,463,756 | 77,323,487  | 9q22.33  | 9q21.13  |
| LU12_L  | 20 | 1  | 1  | 101,472,114 | 91,628,715  | 1p21.2   | 1p22.2   |
| LU12_L  | 14 | 1  | 1  | 101,543,302 | 109,907,754 | 1p21.2   | 1p13.3   |
| LU12_L  | 5  | 1  | 1  | 101,547,067 | 89,094,369  | 1p21.2   | 1p22.2   |
| LU18_L  | 3  | 11 | 7  | 101,569,208 | 141,450,767 | 11q22.1  | 7q34     |
| LU5_AD  | 4  | 11 | 11 | 101,586,964 | 101,616,997 | 11q22.1  | 11q22.1  |
| LU11_AD | 8  | 10 | 15 | 101,598,851 | 96,908,770  | 10q24.2  | 15q26.2  |
| LU4_AD  | 3  | 10 | 9  | 101,600,012 | 38,241,137  | 10q24.2  | 9p13.2   |
| LU18_L  | 3  | 7  | 7  | 101,613,234 | 101,653,896 | 7q22.1   | 7q22.1   |
| LU5_AD  | 4  | 11 | 11 | 101,616,997 | 101,586,964 | 11q22.1  | 11q22.1  |
| LU18_L  | 3  | 7  | 7  | 101,653,896 | 101,613,234 | 7q22.1   | 7q22.1   |
| LU20_AD | 4  | 6  | 17 | 101,674,234 | 50,671,704  | 6q16.3   | 17q22    |
| LU12_L  | 3  | 1  | 1  | 101,717,615 | 100,490,822 | 1p21.2   | 1p21.2   |
| LU16_AD | 4  | 1  | 1  | 101,804,126 | 106,771,277 | 1p21.2   | 1p21.1   |
| LU16_AD | 8  | 1  | 1  | 101,804,619 | 68,109,665  | 1p21.2   | 1p31.3   |
| LU16_L  | 5  | 1  | 1  | 101,805,994 | 68,108,978  | 1p21.2   | 1p31.3   |
| LU18_AD | 3  | 6  | 6  | 101,808,555 | 101,842,409 | 6q16.3   | 6q16.3   |
| LU14_L  | 5  | 6  | 6  | 101,818,044 | 103,013,268 | 6q16.3   | 6q16.3   |
| LU3_AD  | 4  | 5  | 5  | 101,821,843 | 101,853,381 | 5q21.1   | 5q21.1   |
| LU18_AD | 3  | 6  | 6  | 101,842,409 | 101,808,555 | 6q16.3   | 6q16.3   |
| LU3_AD  | 4  | 5  | 5  | 101,853,381 | 101,821,843 | 5q21.1   | 5q21.1   |
| LU12_L  | 7  | 1  | 1  | 101,907,490 | 76,089,228  | 1p21.2   | 1p31.1   |
| LU12_L  | 11 | 1  | 1  | 101,911,898 | 76,955,117  | 1p21.2   | 1p31.1   |
| LU7_L   | 5  | 1  | 1  | 101,917,227 | 91,602,221  | 1p21.2   | 1p22.2   |
| LU6_L   | 5  | 1  | 12 | 101,929,795 | 71,653,420  | 1p21.2   | 12q21.1  |
| LU12_L  | 7  | 1  | 1  | 101,936,158 | 78,825,994  | 1p21.2   | 1p31.1   |
| LU12_L  | 3  | 1  | 11 | 101,966,536 | 101,108,844 | 1p21.2   | 11q22.1  |
| LU12_L  | 7  | 1  | 1  | 101,980,828 | 102,855,416 | 1p21.2   | 1p21.1   |
| LU12_L  | 6  | 1  | 1  | 102,057,203 | 80,956,046  | 1p21.2   | 1p31.1   |
| LU12_L  | 14 | 1  | 1  | 102,063,777 | 73,735,464  | 1p21.2   | 1p31.1   |
| LU12_L  | 14 | 1  | 1  | 102,076,509 | 79,580,675  | 1p21.2   | 1p31.1   |
| LU12_L  | 7  | 1  | 1  | 102,078,885 | 90,024,007  | 1p21.2   | 1p22.2   |
| LU12_L  | 14 | 1  | 1  | 102,107,864 | 81,227,403  | 1p21.2   | 1p31.1   |
| LU4_AD  | 4  | 14 | 14 | 102,109,463 | 102,140,548 | 14q32.31 | 14q32.31 |
| LU7_AD  | 4  | 23 | 23 | 102,139,770 | 102,780,866 | Xq22.1   | Xq22.2   |
| LU4_AD  | 4  | 14 | 14 | 102,140,548 | 102,109,463 | 14q32.31 | 14q32.31 |
| LU7_AD  | 3  | 10 | 5  | 102,143,065 | 470,395     | 10q24.31 | 5p15.33  |
| LU6_L   | 29 | 1  | 11 | 102,178,705 | 66,635,658  | 1p21.2   | 11q13.2  |

|         |    |    |    |             |             |          |          |
|---------|----|----|----|-------------|-------------|----------|----------|
| LU3_L   | 4  | 11 | 11 | 102,196,871 | 102,226,654 | 11q22.2  | 11q22.2  |
| LU12_L  | 6  | 1  | 1  | 102,203,596 | 82,140,162  | 1p21.1   | 1p31.1   |
| LU12_L  | 8  | 1  | 1  | 102,219,301 | 99,012,370  | 1p21.1   | 1p21.3   |
| LU3_L   | 4  | 11 | 11 | 102,226,654 | 102,196,871 | 11q22.2  | 11q22.2  |
| LU12_L  | 9  | 1  | 1  | 102,238,047 | 83,962,954  | 1p21.1   | 1p31.1   |
| LU8_L   | 3  | 15 | 15 | 102,280,323 | 82,742,974  | 15q26.3  | 15q25.2  |
| LU3_L   | 3  | 15 | 15 | 102,306,444 | 75,595,768  | 15q26.3  | 15q24.2  |
| LU12_L  | 8  | 1  | 1  | 102,333,633 | 92,244,847  | 1p21.1   | 1p22.1   |
| LU3_AD  | 5  | 15 | 15 | 102,353,938 | 102,386,710 | 15q26.3  | 15q26.3  |
| LU6_AD  | 7  | 11 | 11 | 102,382,351 | 134,144,109 | 11q22.2  | 11q25    |
| LU6_L   | 5  | 11 | 11 | 102,382,500 | 134,143,519 | 11q22.2  | 11q25    |
| LU3_AD  | 5  | 15 | 15 | 102,386,710 | 102,353,938 | 15q26.3  | 15q26.3  |
| LU4_AD  | 6  | 4  | 4  | 102,408,245 | 102,437,790 | 4q24     | 4q24     |
| LU4_AD  | 6  | 4  | 4  | 102,437,790 | 102,408,245 | 4q24     | 4q24     |
| LU12_L  | 7  | 1  | 1  | 102,461,359 | 97,435,327  | 1p21.1   | 1p21.3   |
| LU20_L  | 3  | 15 | 1  | 102,478,589 | 392,517     | 15q26.3  | 1p36.33  |
| LU12_AD | 3  | 15 | 8  | 102,494,133 | 119,738     | 15q26.3  | 8p23.3   |
| LU4_AD  | 3  | 14 | 1  | 102,547,351 | 158,499,686 | 14q32.31 | 1q23.1   |
| LU21_AD | 3  | 4  | 1  | 102,554,044 | 118,773,236 | 4q24     | 1p12     |
| LU12_L  | 13 | 1  | 1  | 102,564,781 | 102,843,276 | 1p21.1   | 1p21.1   |
| LU8_L   | 3  | 11 | 11 | 102,647,236 | 102,711,171 | 11q22.2  | 11q22.2  |
| LU16_L  | 4  | 13 | 1  | 102,669,922 | 62,676,376  | 13q33.1  | 1p31.3   |
| LU12_L  | 9  | 1  | 1  | 102,676,951 | 93,837,181  | 1p21.1   | 1p22.1   |
| LU12_L  | 7  | 1  | 1  | 102,709,444 | 93,842,797  | 1p21.1   | 1p22.1   |
| LU8_L   | 3  | 11 | 11 | 102,711,171 | 102,647,236 | 11q22.2  | 11q22.2  |
| LU12_L  | 7  | 1  | 1  | 102,714,285 | 82,836,857  | 1p21.1   | 1p31.1   |
| LU16_AD | 3  | 23 | 23 | 102,718,700 | 102,766,165 | Xq22.2   | Xq22.2   |
| LU4_AD  | 6  | 1  | 1  | 102,721,218 | 102,753,079 | 1p21.1   | 1p21.1   |
| LU12_L  | 7  | 1  | 1  | 102,722,512 | 91,621,349  | 1p21.1   | 1p22.2   |
| LU4_AD  | 6  | 1  | 1  | 102,753,079 | 102,721,218 | 1p21.1   | 1p21.1   |
| LU16_AD | 3  | 23 | 23 | 102,766,165 | 102,718,700 | Xq22.2   | Xq22.2   |
| LU7_AD  | 4  | 23 | 23 | 102,780,866 | 102,139,770 | Xq22.2   | Xq22.1   |
| LU12_L  | 3  | 1  | 1  | 102,793,725 | 103,340,668 | 1p21.1   | 1p21.1   |
| LU12_L  | 4  | 1  | 1  | 102,803,793 | 80,959,009  | 1p21.1   | 1p31.1   |
| LU18_AD | 3  | 4  | 21 | 102,824,039 | 10,144,358  | 4q24     | 21p11.2  |
| LU21_L  | 4  | 4  | 5  | 102,824,069 | 19,706,830  | 4q24     | 5p14.3   |
| LU3_AD  | 3  | 4  | 20 | 102,826,785 | 23,448,622  | 4q24     | 20p11.21 |
| LU11_AD | 5  | 7  | 12 | 102,841,814 | 83,847,840  | 7q22.1   | 12q21.31 |
| LU12_L  | 13 | 1  | 1  | 102,843,276 | 102,564,781 | 1p21.1   | 1p21.1   |
| LU12_L  | 10 | 1  | 1  | 102,850,184 | 80,433,247  | 1p21.1   | 1p31.1   |
| LU12_L  | 3  | 1  | 1  | 102,850,678 | 87,033,447  | 1p21.1   | 1p22.3   |
| LU12_L  | 7  | 1  | 1  | 102,855,416 | 101,980,828 | 1p21.1   | 1p21.2   |
| LU14_L  | 4  | 6  | 23 | 102,898,143 | 91,855,810  | 6q16.3   | Xq21.32  |
| LU12_L  | 10 | 1  | 1  | 102,906,037 | 97,304,187  | 1p21.1   | 1p21.3   |

|         |    |    |    |             |             |          |         |
|---------|----|----|----|-------------|-------------|----------|---------|
| LU12_L  | 5  | 1  | 1  | 102,914,617 | 97,874,898  | 1p21.1   | 1p21.3  |
| LU4_AD  | 4  | 3  | 1  | 102,932,054 | 48,981,343  | 3q13.11  | 1p33    |
| LU12_L  | 12 | 1  | 1  | 102,933,265 | 93,597,375  | 1p21.1   | 1p22.1  |
| LU14_L  | 5  | 6  | 6  | 103,013,268 | 101,818,044 | 6q16.3   | 6q16.3  |
| LU12_L  | 5  | 1  | 1  | 103,016,729 | 104,529,180 | 1p21.1   | 1p21.1  |
| LU12_L  | 3  | 1  | 1  | 103,020,556 | 81,738,397  | 1p21.1   | 1p31.1  |
| LU6_L   | 4  | 12 | 6  | 103,057,126 | 110,824,879 | 12q23.2  | 6q21    |
| LU21_L  | 3  | 12 | 17 | 103,058,217 | 6,778,881   | 12q23.2  | 17p13.1 |
| LU14_L  | 3  | 12 | 11 | 103,059,241 | 59,693,414  | 12q23.2  | 11q12.1 |
| LU18_L  | 5  | 12 | 6  | 103,059,319 | 110,820,567 | 12q23.2  | 6q21    |
| LU12_L  | 4  | 1  | 1  | 103,073,944 | 106,654,685 | 1p21.1   | 1p21.1  |
| LU12_L  | 5  | 1  | 1  | 103,085,497 | 95,472,791  | 1p21.1   | 1p21.3  |
| LU12_L  | 3  | 1  | 1  | 103,085,760 | 86,406,632  | 1p21.1   | 1p22.3  |
| LU12_L  | 9  | 1  | 1  | 103,112,735 | 85,292,532  | 1p21.1   | 1p22.3  |
| LU12_L  | 6  | 1  | 1  | 103,113,212 | 81,561,768  | 1p21.1   | 1p31.1  |
| LU12_L  | 4  | 4  | 1  | 103,155,848 | 87,273,944  | 4q24     | 1p22.3  |
| LU8_L   | 3  | 4  | 10 | 103,161,983 | 110,805,606 | 4q24     | 10q25.1 |
| LU12_L  | 4  | 8  | 8  | 103,242,198 | 28,706,022  | 8q22.3   | 8p21.1  |
| LU4_AD  | 3  | 11 | 4  | 103,272,244 | 156,382,029 | 11q22.3  | 4q32.1  |
| LU12_L  | 8  | 1  | 1  | 103,274,963 | 97,944,536  | 1p21.1   | 1p21.3  |
| LU12_L  | 9  | 1  | 1  | 103,298,406 | 73,578,896  | 1p21.1   | 1p31.1  |
| LU16_L  | 4  | 1  | 1  | 103,300,360 | 109,966,678 | 1p21.1   | 1p13.3  |
| LU20_L  | 3  | 4  | 4  | 103,307,393 | 103,339,739 | 4q24     | 4q24    |
| LU20_L  | 3  | 4  | 4  | 103,339,739 | 103,307,393 | 4q24     | 4q24    |
| LU12_L  | 3  | 1  | 1  | 103,340,668 | 102,793,725 | 1p21.1   | 1p21.1  |
| LU3_L   | 3  | 12 | 12 | 103,357,450 | 103,396,743 | 12q23.2  | 12q23.2 |
| LU12_L  | 11 | 1  | 1  | 103,365,002 | 87,653,237  | 1p21.1   | 1p22.3  |
| LU6_L   | 11 | 1  | 11 | 103,365,317 | 66,574,476  | 1p21.1   | 11q13.2 |
| LU12_L  | 5  | 1  | 1  | 103,371,132 | 99,273,660  | 1p21.1   | 1p21.3  |
| LU3_L   | 3  | 12 | 12 | 103,396,743 | 103,357,450 | 12q23.2  | 12q23.2 |
| LU15_L  | 4  | 5  | 5  | 103,403,494 | 107,906,620 | 5q21.2   | 5q21.3  |
| LU12_L  | 4  | 5  | 1  | 103,404,169 | 55,489,700  | 5q21.2   | 1p32.3  |
| LU12_L  | 7  | 1  | 1  | 103,452,646 | 97,368,243  | 1p21.1   | 1p21.3  |
| LU12_L  | 4  | 1  | 1  | 103,477,630 | 74,276,194  | 1p21.1   | 1p31.1  |
| LU15_AD | 7  | 9  | 9  | 103,545,276 | 71,935,671  | 9q31.1   | 9q21.11 |
| LU8_AD  | 3  | 7  | 7  | 103,600,274 | 103,634,882 | 7q22.1   | 7q22.1  |
| LU8_AD  | 3  | 7  | 7  | 103,634,882 | 103,600,274 | 7q22.1   | 7q22.1  |
| LU8_L   | 3  | 11 | 11 | 103,661,580 | 103,693,056 | 11q22.3  | 11q22.3 |
| LU3_L   | 4  | 7  | 7  | 103,672,890 | 103,702,635 | 7q22.1   | 7q22.1  |
| LU12_L  | 9  | 1  | 1  | 103,684,123 | 81,062,208  | 1p21.1   | 1p31.1  |
| LU12_L  | 8  | 1  | 1  | 103,684,314 | 80,943,321  | 1p21.1   | 1p31.1  |
| LU8_L   | 3  | 11 | 11 | 103,693,056 | 103,661,580 | 11q22.3  | 11q22.3 |
| LU15_L  | 5  | 14 | 1  | 103,701,174 | 142,594,981 | 14q32.32 | 1q12    |
| LU15_L  | 3  | 14 | 7  | 103,702,302 | 155,031,302 | 14q32.32 | 7q36.2  |

|         |    |    |    |             |             |          |          |
|---------|----|----|----|-------------|-------------|----------|----------|
| LU3_L   | 4  | 7  | 7  | 103,702,635 | 103,672,890 | 7q22.1   | 7q22.1   |
| LU18_AD | 4  | 14 | 5  | 103,705,008 | 1,579,368   | 14q32.32 | 5p15.33  |
| LU14_AD | 5  | 7  | 7  | 103,849,334 | 103,918,699 | 7q22.2   | 7q22.2   |
| LU16_AD | 3  | 9  | 23 | 103,887,727 | 155,030,957 | 9q31.1   | Xq28     |
| LU14_AD | 5  | 7  | 7  | 103,918,699 | 103,849,334 | 7q22.2   | 7q22.2   |
| LU12_L  | 15 | 1  | 1  | 104,066,140 | 76,632,720  | 1p21.1   | 1p31.1   |
| LU12_L  | 7  | 1  | 1  | 104,088,432 | 92,154,149  | 1p21.1   | 1p22.1   |
| LU4_AD  | 4  | 2  | 2  | 104,090,561 | 104,129,396 | 2q12.1   | 2q12.1   |
| LU12_L  | 16 | 1  | 1  | 104,108,169 | 98,242,347  | 1p21.1   | 1p21.3   |
| LU12_L  | 16 | 1  | 1  | 104,108,639 | 93,675,610  | 1p21.1   | 1p22.1   |
| LU12_L  | 5  | 1  | 1  | 104,122,986 | 73,375,595  | 1p21.1   | 1p31.1   |
| LU4_AD  | 4  | 2  | 2  | 104,129,396 | 104,090,561 | 2q12.1   | 2q12.1   |
| LU8_L   | 3  | 23 | 8  | 104,130,919 | 54,373,083  | Xq22.3   | 8q11.23  |
| LU20_L  | 5  | 23 | 10 | 104,131,202 | 37,569,382  | Xq22.3   | 10p11.21 |
| LU18_AD | 5  | 4  | 12 | 104,145,598 | 68,934,882  | 4q24     | 12q15    |
| LU7_L   | 3  | 4  | 13 | 104,148,247 | 78,542,756  | 4q24     | 13q22.3  |
| LU20_L  | 3  | 8  | 8  | 104,198,775 | 104,242,201 | 8q22.3   | 8q22.3   |
| LU12_L  | 4  | 1  | 1  | 104,236,482 | 88,104,420  | 1p21.1   | 1p22.3   |
| LU20_L  | 3  | 8  | 8  | 104,242,201 | 104,198,775 | 8q22.3   | 8q22.3   |
| LU4_AD  | 3  | 4  | 4  | 104,305,517 | 104,338,395 | 4q24     | 4q24     |
| LU4_AD  | 3  | 4  | 4  | 104,338,395 | 104,305,517 | 4q24     | 4q24     |
| LU12_L  | 5  | 1  | 1  | 104,406,467 | 74,667,614  | 1p21.1   | 1p31.1   |
| LU12_L  | 4  | 1  | 1  | 104,446,320 | 100,621,526 | 1p21.1   | 1p21.2   |
| LU3_L   | 6  | 4  | 16 | 104,475,260 | 86,771,328  | 4q24     | 16q24.1  |
| LU12_AD | 3  | 4  | 8  | 104,478,374 | 8,027,757   | 4q24     | 8p23.1   |
| LU12_L  | 10 | 1  | 1  | 104,486,255 | 79,449,074  | 1p21.1   | 1p31.1   |
| LU12_L  | 5  | 1  | 1  | 104,493,882 | 95,344,262  | 1p21.1   | 1p21.3   |
| LU12_L  | 5  | 1  | 1  | 104,529,180 | 103,016,729 | 1p21.1   | 1p21.1   |
| LU12_L  | 7  | 1  | 1  | 104,534,006 | 75,607,215  | 1p21.1   | 1p31.1   |
| LU12_L  | 20 | 8  | 8  | 104,547,102 | 24,908,703  | 8q22.3   | 8p21.2   |
| LU4_L   | 4  | 5  | 5  | 104,584,630 | 104,615,694 | 5q21.3   | 5q21.3   |
| LU3_L   | 4  | 11 | 11 | 104,595,877 | 104,625,476 | 11q22.3  | 11q22.3  |
| LU4_L   | 4  | 5  | 5  | 104,615,694 | 104,584,630 | 5q21.3   | 5q21.3   |
| LU3_L   | 4  | 11 | 11 | 104,625,476 | 104,595,877 | 11q22.3  | 11q22.3  |
| LU12_L  | 15 | 1  | 1  | 104,632,073 | 81,742,408  | 1p21.1   | 1p31.1   |
| LU3_L   | 3  | 23 | 5  | 104,650,950 | 37,504,332  | Xq22.3   | 5p13.2   |
| LU12_L  | 15 | 8  | 8  | 104,706,094 | 2,975,819   | 8q22.3   | 8p23.2   |
| LU12_L  | 6  | 8  | 8  | 104,710,516 | 93,118,212  | 8q22.3   | 8q21.3   |
| LU12_L  | 15 | 1  | 1  | 104,810,326 | 78,124,955  | 1p21.1   | 1p31.1   |
| LU12_L  | 7  | 1  | 1  | 104,828,295 | 105,599,503 | 1p21.1   | 1p21.1   |
| LU21_L  | 4  | 8  | 8  | 104,837,909 | 104,875,512 | 8q22.3   | 8q22.3   |
| LU21_L  | 4  | 8  | 8  | 104,875,512 | 104,837,909 | 8q22.3   | 8q22.3   |
| LU18_L  | 3  | 1  | 23 | 104,923,957 | 115,126,707 | 1p21.1   | Xq23     |
| LU4_L   | 3  | 1  | 8  | 105,005,801 | 35,817,778  | 1p21.1   | 8p12     |

|         |    |    |    |             |             |          |          |
|---------|----|----|----|-------------|-------------|----------|----------|
| LU12_L  | 5  | 1  | 1  | 105,065,791 | 91,629,321  | 1p21.1   | 1p22.2   |
| LU12_L  | 4  | 1  | 1  | 105,066,399 | 79,864,084  | 1p21.1   | 1p31.1   |
| LU12_L  | 5  | 1  | 1  | 105,131,659 | 92,939,797  | 1p21.1   | 1p22.1   |
| LU12_L  | 3  | 1  | 1  | 105,132,408 | 92,568,285  | 1p21.1   | 1p22.1   |
| LU3_L   | 3  | 3  | 3  | 105,138,121 | 105,170,166 | 3q13.11  | 3q13.11  |
| LU7_L   | 4  | 1  | 10 | 105,138,894 | 107,492,730 | 1p21.1   | 10q25.1  |
| LU3_L   | 3  | 3  | 3  | 105,170,166 | 105,138,121 | 3q13.11  | 3q13.11  |
| LU12_L  | 11 | 1  | 1  | 105,241,062 | 95,469,247  | 1p21.1   | 1p21.3   |
| LU3_AD  | 3  | 23 | 11 | 105,427,426 | 93,850,323  | Xq22.3   | 11q21    |
| LU12_L  | 9  | 1  | 1  | 105,435,382 | 78,991,419  | 1p21.1   | 1p31.1   |
| LU12_L  | 7  | 1  | 1  | 105,439,476 | 84,816,263  | 1p21.1   | 1p31.1   |
| LU12_L  | 7  | 1  | 1  | 105,466,361 | 87,642,293  | 1p21.1   | 1p22.3   |
| LU12_L  | 7  | 1  | 1  | 105,470,915 | 91,185,452  | 1p21.1   | 1p22.2   |
| LU12_L  | 10 | 1  | 1  | 105,472,252 | 75,680,237  | 1p21.1   | 1p31.1   |
| LU12_L  | 5  | 1  | 1  | 105,486,624 | 97,805,867  | 1p21.1   | 1p21.3   |
| LU4_AD  | 3  | 13 | 13 | 105,526,707 | 105,557,261 | 13q33.2  | 13q33.2  |
| LU12_L  | 3  | 1  | 1  | 105,556,425 | 99,585,726  | 1p21.1   | 1p21.3   |
| LU4_AD  | 3  | 13 | 13 | 105,557,261 | 105,526,707 | 13q33.2  | 13q33.2  |
| LU4_L   | 3  | 4  | 4  | 105,558,391 | 105,589,816 | 4q24     | 4q24     |
| LU12_L  | 10 | 1  | 1  | 105,588,081 | 74,522,129  | 1p21.1   | 1p31.1   |
| LU12_L  | 7  | 1  | 1  | 105,588,674 | 106,114,047 | 1p21.1   | 1p21.1   |
| LU4_L   | 3  | 4  | 4  | 105,589,816 | 105,558,391 | 4q24     | 4q24     |
| LU5_AD  | 3  | 10 | 10 | 105,592,777 | 105,626,372 | 10q24.33 | 10q24.33 |
| LU12_L  | 7  | 1  | 1  | 105,599,503 | 104,828,295 | 1p21.1   | 1p21.1   |
| LU5_AD  | 3  | 10 | 10 | 105,626,372 | 105,592,777 | 10q24.33 | 10q24.33 |
| LU12_L  | 6  | 1  | 1  | 105,641,710 | 91,950,859  | 1p21.1   | 1p22.2   |
| LU4_AD  | 3  | 6  | 6  | 105,645,280 | 105,682,604 | 6q21     | 6q21     |
| LU12_L  | 6  | 1  | 1  | 105,656,494 | 84,022,280  | 1p21.1   | 1p31.1   |
| LU4_AD  | 3  | 6  | 6  | 105,682,604 | 105,645,280 | 6q21     | 6q21     |
| LU21_L  | 4  | 12 | 21 | 105,701,821 | 10,140,630  | 12q23.3  | 21p11.2  |
| LU12_L  | 3  | 1  | 1  | 105,762,482 | 86,841,236  | 1p21.1   | 1p22.3   |
| LU12_L  | 8  | 1  | 1  | 105,819,860 | 91,647,464  | 1p21.1   | 1p22.2   |
| LU12_L  | 14 | 1  | 1  | 105,858,307 | 90,929,699  | 1p21.1   | 1p22.2   |
| LU15_L  | 4  | 12 | 7  | 105,906,669 | 21,918,916  | 12q23.3  | 7p15.3   |
| LU20_L  | 3  | 1  | 1  | 105,921,576 | 105,953,418 | 1p21.1   | 1p21.1   |
| LU20_L  | 3  | 1  | 1  | 105,953,418 | 105,921,576 | 1p21.1   | 1p21.1   |
| LU3_L   | 3  | 12 | 14 | 105,997,191 | 86,391,087  | 12q23.3  | 14q31.3  |
| LU14_AD | 3  | 13 | 13 | 106,020,148 | 106,052,150 | 13q33.2  | 13q33.2  |
| LU12_L  | 7  | 1  | 1  | 106,032,382 | 87,448,439  | 1p21.1   | 1p22.3   |
| LU12_L  | 6  | 1  | 1  | 106,034,413 | 83,348,041  | 1p21.1   | 1p31.1   |
| LU12_L  | 13 | 1  | 1  | 106,048,576 | 85,165,123  | 1p21.1   | 1p22.3   |
| LU14_AD | 3  | 13 | 13 | 106,052,150 | 106,020,148 | 13q33.2  | 13q33.2  |
| LU12_L  | 9  | 1  | 1  | 106,067,225 | 98,760,005  | 1p21.1   | 1p21.3   |
| LU12_L  | 5  | 1  | 1  | 106,075,499 | 83,758,437  | 1p21.1   | 1p31.1   |

|         |    |    |    |             |             |          |          |
|---------|----|----|----|-------------|-------------|----------|----------|
| LU12_L  | 7  | 1  | 1  | 106,114,047 | 105,588,674 | 1p21.1   | 1p21.1   |
| LU12_L  | 11 | 1  | 1  | 106,184,745 | 91,347,524  | 1p21.1   | 1p22.2   |
| LU4_AD  | 3  | 23 | 23 | 106,209,317 | 106,243,853 | Xq22.3   | Xq22.3   |
| LU12_L  | 17 | 1  | 1  | 106,241,251 | 79,163,016  | 1p21.1   | 1p31.1   |
| LU4_AD  | 3  | 23 | 23 | 106,243,853 | 106,209,317 | Xq22.3   | Xq22.3   |
| LU12_L  | 3  | 1  | 1  | 106,256,498 | 84,647,131  | 1p21.1   | 1p31.1   |
| LU12_L  | 5  | 1  | 1  | 106,272,069 | 97,951,977  | 1p21.1   | 1p21.3   |
| LU20_AD | 3  | 23 | 20 | 106,296,429 | 53,968,148  | Xq22.3   | 20q13.2  |
| LU12_L  | 10 | 1  | 1  | 106,297,094 | 97,871,373  | 1p21.1   | 1p21.3   |
| LU12_L  | 11 | 1  | 1  | 106,299,328 | 93,642,323  | 1p21.1   | 1p22.1   |
| LU12_L  | 8  | 1  | 1  | 106,301,054 | 100,058,938 | 1p21.1   | 1p21.2   |
| LU16_L  | 5  | 14 | 2  | 106,323,172 | 241,322,019 | 14q32.33 | 2q37.3   |
| LU3_AD  | 5  | 14 | 2  | 106,324,020 | 241,328,291 | 14q32.33 | 2q37.3   |
| LU12_L  | 9  | 1  | 1  | 106,331,236 | 106,982,746 | 1p21.1   | 1p21.1   |
| LU12_L  | 11 | 1  | 1  | 106,337,587 | 96,023,137  | 1p21.1   | 1p21.3   |
| LU12_L  | 21 | 1  | 1  | 106,370,331 | 84,029,131  | 1p21.1   | 1p31.1   |
| LU12_L  | 8  | 1  | 1  | 106,431,059 | 83,575,486  | 1p21.1   | 1p31.1   |
| LU4_AD  | 3  | 1  | 1  | 106,438,618 | 106,471,166 | 1p21.1   | 1p21.1   |
| LU4_L   | 4  | 10 | 10 | 106,443,230 | 106,472,883 | 10q25.1  | 10q25.1  |
| LU12_L  | 15 | 1  | 1  | 106,450,685 | 107,929,478 | 1p21.1   | 1p13.3   |
| LU12_L  | 7  | 1  | 1  | 106,452,938 | 86,683,488  | 1p21.1   | 1p22.3   |
| LU4_AD  | 3  | 1  | 1  | 106,471,166 | 106,438,618 | 1p21.1   | 1p21.1   |
| LU4_L   | 4  | 10 | 10 | 106,472,883 | 106,443,230 | 10q25.1  | 10q25.1  |
| LU12_L  | 6  | 1  | 1  | 106,501,351 | 85,047,875  | 1p21.1   | 1p22.3   |
| LU12_L  | 10 | 1  | 1  | 106,502,128 | 81,301,404  | 1p21.1   | 1p31.1   |
| LU18_L  | 4  | 14 | 16 | 106,521,894 | 33,598,487  | 14q32.33 | 16p11.2  |
| LU21_L  | 4  | 14 | 16 | 106,526,778 | 33,591,730  | 14q32.33 | 16p11.2  |
| LU12_L  | 11 | 1  | 1  | 106,526,925 | 87,626,913  | 1p21.1   | 1p22.3   |
| LU5_L   | 4  | 12 | 14 | 106,565,692 | 92,434,297  | 12q23.3  | 14q32.12 |
| LU21_L  | 4  | 8  | 8  | 106,601,469 | 106,655,395 | 8q23.1   | 8q23.1   |
| LU12_L  | 4  | 1  | 1  | 106,654,685 | 103,073,944 | 1p21.1   | 1p21.1   |
| LU21_L  | 4  | 8  | 8  | 106,655,395 | 106,601,469 | 8q23.1   | 8q23.1   |
| LU12_L  | 5  | 1  | 1  | 106,658,761 | 79,070,650  | 1p21.1   | 1p31.1   |
| LU3_AD  | 3  | 23 | 23 | 106,668,071 | 106,701,522 | Xq22.3   | Xq22.3   |
| LU11_AD | 4  | 6  | 3  | 106,678,590 | 38,335,750  | 6q21     | 3p22.2   |
| LU4_AD  | 3  | 6  | 23 | 106,679,619 | 75,121,255  | 6q21     | Xq13.3   |
| LU7_L   | 3  | 6  | 6  | 106,680,467 | 111,452,454 | 6q21     | 6q21     |
| LU5_L   | 3  | 6  | 4  | 106,681,866 | 139,544,514 | 6q21     | 4q31.1   |
| LU3_AD  | 3  | 23 | 23 | 106,701,522 | 106,668,071 | Xq22.3   | Xq22.3   |
| LU16_L  | 21 | 1  | 8  | 106,718,757 | 37,434,501  | 1p21.1   | 8p11.23  |
| LU16_AD | 21 | 1  | 8  | 106,719,090 | 37,433,898  | 1p21.1   | 8p11.23  |
| LU16_L  | 4  | 1  | 1  | 106,770,336 | 68,109,403  | 1p21.1   | 1p31.3   |
| LU16_AD | 9  | 1  | 1  | 106,770,739 | 68,109,519  | 1p21.1   | 1p31.3   |
| LU16_AD | 4  | 1  | 1  | 106,771,277 | 101,804,126 | 1p21.1   | 1p21.2   |

|         |    |    |    |             |             |          |          |
|---------|----|----|----|-------------|-------------|----------|----------|
| LU16_L  | 4  | 1  | 6  | 106,773,768 | 68,129,570  | 1p21.1   | 6q12     |
| LU3_AD  | 3  | 10 | 10 | 106,806,442 | 106,839,243 | 10q25.1  | 10q25.1  |
| LU3_AD  | 4  | 3  | 5  | 106,822,381 | 23,298,862  | 3q13.12  | 5p14.3   |
| LU3_AD  | 3  | 10 | 10 | 106,839,243 | 106,806,442 | 10q25.1  | 10q25.1  |
| LU20_AD | 4  | 14 | 16 | 106,845,783 | 32,083,637  | 14q32.33 | 16p11.2  |
| LU12_L  | 4  | 1  | 1  | 106,849,292 | 99,117,512  | 1p21.1   | 1p21.3   |
| LU12_L  | 7  | 1  | 1  | 106,886,289 | 97,191,116  | 1p21.1   | 1p21.3   |
| LU12_L  | 3  | 1  | 1  | 106,888,769 | 73,361,369  | 1p21.1   | 1p31.1   |
| LU12_L  | 14 | 1  | 1  | 106,900,685 | 91,731,086  | 1p21.1   | 1p22.2   |
| LU12_L  | 5  | 1  | 1  | 106,904,374 | 87,106,806  | 1p21.1   | 1p22.3   |
| LU12_L  | 4  | 1  | 1  | 106,912,270 | 85,811,605  | 1p21.1   | 1p22.3   |
| LU12_L  | 6  | 1  | 1  | 106,961,998 | 91,172,050  | 1p21.1   | 1p22.2   |
| LU20_L  | 3  | 14 | 14 | 106,972,855 | 107,002,554 | 14q32.33 | 14q32.33 |
| LU11_AD | 11 | 12 | 12 | 106,975,678 | 56,654,563  | 12q23.3  | 12q13.3  |
| LU11_L  | 6  | 12 | 12 | 106,975,753 | 56,654,999  | 12q23.3  | 12q13.3  |
| LU12_L  | 13 | 1  | 1  | 106,981,915 | 92,006,931  | 1p21.1   | 1p22.1   |
| LU12_L  | 9  | 1  | 1  | 106,982,746 | 106,331,236 | 1p21.1   | 1p21.1   |
| LU20_L  | 3  | 14 | 14 | 107,002,554 | 106,972,855 | 14q32.33 | 14q32.33 |
| LU3_L   | 4  | 5  | 5  | 107,023,224 | 107,056,012 | 5q21.3   | 5q21.3   |
| LU12_L  | 7  | 1  | 1  | 107,044,704 | 99,462,417  | 1p21.1   | 1p21.3   |
| LU12_L  | 8  | 1  | 1  | 107,049,002 | 85,051,791  | 1p21.1   | 1p22.3   |
| LU3_L   | 4  | 5  | 5  | 107,056,012 | 107,023,224 | 5q21.3   | 5q21.3   |
| LU11_L  | 8  | 12 | 12 | 107,061,661 | 59,204,836  | 12q23.3  | 12q14.1  |
| LU18_L  | 3  | 5  | 16 | 107,062,651 | 8,993,936   | 5q21.3   | 16p13.2  |
| LU11_L  | 4  | 12 | 7  | 107,093,360 | 69,746,843  | 12q23.3  | 7q11.22  |
| LU4_AD  | 4  | 11 | 11 | 107,105,003 | 109,364,233 | 11q22.3  | 11q22.3  |
| LU5_L   | 3  | 11 | 11 | 107,106,514 | 107,849,979 | 11q22.3  | 11q22.3  |
| LU20_AD | 3  | 14 | 16 | 107,123,029 | 31,984,184  | 14q32.33 | 16p11.2  |
| LU11_L  | 4  | 12 | 12 | 107,125,964 | 56,880,800  | 12q23.3  | 12q13.3  |
| LU12_L  | 6  | 1  | 1  | 107,142,592 | 98,085,637  | 1p21.1   | 1p21.3   |
| LU11_L  | 4  | 12 | 12 | 107,144,272 | 56,554,024  | 12q23.3  | 12q13.2  |
| LU11_L  | 3  | 14 | 14 | 107,153,008 | 107,201,270 | 14q32.33 | 14q32.33 |
| LU11_AD | 9  | 14 | 14 | 107,153,105 | 107,200,223 | 14q32.33 | 14q32.33 |
| LU11_L  | 8  | 12 | 12 | 107,153,347 | 47,846,431  | 12q23.3  | 12q13.11 |
| LU11_AD | 5  | 14 | 14 | 107,153,611 | 107,204,575 | 14q32.33 | 14q32.33 |
| LU11_L  | 4  | 12 | 18 | 107,173,990 | 29,335,194  | 12q23.3  | 18q12.1  |
| LU12_L  | 11 | 1  | 1  | 107,174,538 | 109,869,570 | 1p21.1   | 1p13.3   |
| LU18_L  | 3  | 14 | 15 | 107,180,208 | 20,843,852  | 14q32.33 | 15q11.2  |
| LU11_AD | 9  | 14 | 14 | 107,200,223 | 107,153,105 | 14q32.33 | 14q32.33 |
| LU11_L  | 3  | 14 | 14 | 107,201,270 | 107,153,008 | 14q32.33 | 14q32.33 |
| LU11_AD | 5  | 14 | 14 | 107,204,575 | 107,153,611 | 14q32.33 | 14q32.33 |
| LU12_L  | 9  | 1  | 1  | 107,228,123 | 95,868,980  | 1p13.3   | 1p21.3   |
| LU11_L  | 22 | 12 | 12 | 107,271,757 | 56,573,324  | 12q23.3  | 12q13.2  |
| LU12_L  | 6  | 1  | 1  | 107,303,133 | 79,776,731  | 1p13.3   | 1p31.1   |



|         |    |    |    |             |             |         |         |
|---------|----|----|----|-------------|-------------|---------|---------|
| LU11_L  | 13 | 12 | 18 | 107,331,037 | 31,383,761  | 12q23.3 | 18q12.1 |
| LU11_L  | 6  | 12 | 12 | 107,370,009 | 62,226,487  | 12q23.3 | 12q14.1 |
| LU12_L  | 4  | 1  | 1  | 107,373,725 | 74,464,342  | 1p13.3  | 1p31.1  |
| LU8_L   | 3  | 10 | 10 | 107,446,076 | 23,423,188  | 10q25.1 | 10p12.2 |
| LU11_L  | 14 | 12 | 18 | 107,450,035 | 31,316,914  | 12q23.3 | 18q12.1 |
| LU12_L  | 7  | 1  | 1  | 107,463,135 | 96,576,182  | 1p13.3  | 1p21.3  |
| LU12_L  | 7  | 1  | 1  | 107,484,055 | 96,938,289  | 1p13.3  | 1p21.3  |
| LU12_L  | 9  | 1  | 1  | 107,486,532 | 81,243,715  | 1p13.3  | 1p31.1  |
| LU4_AD  | 3  | 10 | 2  | 107,486,851 | 41,608,064  | 10q25.1 | 2p22.1  |
| LU12_L  | 9  | 1  | 1  | 107,487,533 | 97,454,693  | 1p13.3  | 1p21.3  |
| LU7_L   | 4  | 10 | 1  | 107,492,730 | 105,138,894 | 10q25.1 | 1p21.1  |
| LU12_L  | 35 | 8  | 8  | 107,502,778 | 142,930,740 | 8q23.1  | 8q24.3  |
| LU12_L  | 8  | 1  | 1  | 107,523,885 | 81,754,771  | 1p13.3  | 1p31.1  |
| LU5_AD  | 3  | 23 | 23 | 107,530,945 | 107,563,854 | Xq22.3  | Xq22.3  |
| LU12_L  | 9  | 1  | 1  | 107,552,149 | 86,590,179  | 1p13.3  | 1p22.3  |
| LU12_L  | 5  | 1  | 1  | 107,557,437 | 82,339,929  | 1p13.3  | 1p31.1  |
| LU5_AD  | 3  | 23 | 23 | 107,563,854 | 107,530,945 | Xq22.3  | Xq22.3  |
| LU11_AD | 10 | 12 | 18 | 107,570,265 | 32,981,552  | 12q23.3 | 18q12.2 |
| LU12_L  | 3  | 12 | 5  | 107,608,536 | 96,647,295  | 12q23.3 | 5q15    |
| LU20_L  | 3  | 11 | 11 | 107,628,279 | 107,669,939 | 11q22.3 | 11q22.3 |
| LU6_L   | 3  | 4  | 4  | 107,640,310 | 107,683,826 | 4q24    | 4q24    |
| LU20_L  | 3  | 11 | 11 | 107,669,939 | 107,628,279 | 11q22.3 | 11q22.3 |
| LU6_L   | 3  | 4  | 4  | 107,683,826 | 107,640,310 | 4q24    | 4q24    |
| LU12_L  | 5  | 1  | 1  | 107,690,380 | 95,098,487  | 1p13.3  | 1p21.3  |
| LU12_L  | 9  | 1  | 1  | 107,692,658 | 96,682,961  | 1p13.3  | 1p21.3  |
| LU12_L  | 11 | 1  | 1  | 107,749,931 | 74,406,487  | 1p13.3  | 1p31.1  |
| LU12_L  | 12 | 1  | 1  | 107,750,664 | 74,308,228  | 1p13.3  | 1p31.1  |
| LU12_L  | 9  | 1  | 1  | 107,766,523 | 85,344,090  | 1p13.3  | 1p22.3  |
| LU12_L  | 11 | 1  | 1  | 107,786,062 | 80,249,384  | 1p13.3  | 1p31.1  |
| LU12_L  | 15 | 1  | 1  | 107,794,820 | 77,809,037  | 1p13.3  | 1p31.1  |
| LU12_L  | 20 | 1  | 1  | 107,797,298 | 98,673,433  | 1p13.3  | 1p21.3  |
| LU12_L  | 5  | 1  | 1  | 107,821,039 | 107,890,346 | 1p13.3  | 1p13.3  |
| LU12_L  | 13 | 1  | 1  | 107,825,228 | 79,691,456  | 1p13.3  | 1p31.1  |
| LU5_L   | 3  | 11 | 11 | 107,849,979 | 107,106,514 | 11q22.3 | 11q22.3 |
| LU8_AD  | 3  | 5  | 1  | 107,888,882 | 232,366,778 | 5q21.3  | 1q42.2  |
| LU12_L  | 5  | 1  | 1  | 107,890,346 | 107,821,039 | 1p13.3  | 1p13.3  |
| LU12_L  | 18 | 1  | 1  | 107,890,374 | 100,095,269 | 1p13.3  | 1p21.2  |
| LU15_L  | 4  | 5  | 5  | 107,906,620 | 103,403,494 | 5q21.3  | 5q21.2  |
| LU12_L  | 10 | 1  | 1  | 107,919,016 | 87,049,729  | 1p13.3  | 1p22.3  |
| LU12_L  | 8  | 1  | 1  | 107,927,617 | 78,830,147  | 1p13.3  | 1p31.1  |
| LU12_L  | 15 | 1  | 1  | 107,929,478 | 106,450,685 | 1p13.3  | 1p21.1  |
| LU12_L  | 9  | 1  | 1  | 107,932,861 | 81,649,055  | 1p13.3  | 1p31.1  |
| LU12_L  | 17 | 1  | 1  | 107,966,675 | 83,183,411  | 1p13.3  | 1p31.1  |
| LU12_L  | 9  | 1  | 1  | 107,974,197 | 95,334,992  | 1p13.3  | 1p21.3  |

|         |    |    |    |             |             |         |          |
|---------|----|----|----|-------------|-------------|---------|----------|
| LU11_L  | 12 | 12 | 12 | 108,022,549 | 58,520,885  | 12q23.3 | 12q14.1  |
| LU11_L  | 3  | 12 | 12 | 108,052,967 | 118,993,403 | 12q23.3 | 12q24.23 |
| LU11_L  | 11 | 12 | 12 | 108,059,141 | 118,982,092 | 12q23.3 | 12q24.23 |
| LU11_AD | 38 | 12 | 12 | 108,061,434 | 118,980,076 | 12q23.3 | 12q24.23 |
| LU7_L   | 3  | 4  | 4  | 108,143,544 | 108,183,695 | 4q25    | 4q25     |
| LU7_L   | 3  | 4  | 4  | 108,183,695 | 108,143,544 | 4q25    | 4q25     |
| LU12_L  | 8  | 1  | 1  | 108,209,334 | 74,557,423  | 1p13.3  | 1p31.1   |
| LU5_AD  | 3  | 7  | 7  | 108,252,276 | 108,284,959 | 7q31.1  | 7q31.1   |
| LU12_L  | 17 | 8  | 8  | 108,277,422 | 50,500,555  | 8q23.1  | 8q11.21  |
| LU5_AD  | 3  | 7  | 7  | 108,284,959 | 108,252,276 | 7q31.1  | 7q31.1   |
| LU20_L  | 3  | 4  | 8  | 108,337,795 | 66,039,324  | 4q25    | 8q13.1   |
| LU12_L  | 9  | 1  | 1  | 108,343,202 | 96,972,984  | 1p13.3  | 1p21.3   |
| LU3_L   | 3  | 1  | 1  | 108,413,215 | 108,445,042 | 1p13.3  | 1p13.3   |
| LU3_L   | 3  | 1  | 1  | 108,445,042 | 108,413,215 | 1p13.3  | 1p13.3   |
| LU3_AD  | 3  | 13 | 13 | 108,451,970 | 108,492,102 | 13q33.3 | 13q33.3  |
| LU3_AD  | 3  | 13 | 13 | 108,492,102 | 108,451,970 | 13q33.3 | 13q33.3  |
| LU4_AD  | 4  | 9  | 19 | 108,554,117 | 41,966,048  | 9q31.2  | 19q13.2  |
| LU4_AD  | 3  | 9  | 13 | 108,557,895 | 62,517,155  | 9q31.2  | 13q21.31 |
| LU12_L  | 9  | 1  | 1  | 108,558,982 | 88,672,285  | 1p13.3  | 1p22.2   |
| LU12_L  | 8  | 1  | 1  | 108,559,142 | 85,637,603  | 1p13.3  | 1p22.3   |
| LU7_L   | 3  | 8  | 9  | 108,585,374 | 14,966,969  | 8q23.1  | 9p22.3   |
| LU7_AD  | 5  | 8  | 19 | 108,585,571 | 42,018,474  | 8q23.1  | 19q13.2  |
| LU4_AD  | 5  | 8  | 8  | 108,588,606 | 29,158,324  | 8q23.1  | 8p12     |
| LU12_L  | 6  | 1  | 1  | 108,590,287 | 74,994,103  | 1p13.3  | 1p31.1   |
| LU12_L  | 6  | 1  | 1  | 108,593,537 | 76,563,353  | 1p13.3  | 1p31.1   |
| LU12_L  | 13 | 1  | 1  | 108,613,681 | 108,649,514 | 1p13.3  | 1p13.3   |
| LU12_L  | 16 | 8  | 8  | 108,614,004 | 94,856,218  | 8q23.1  | 8q22.1   |
| LU8_L   | 4  | 11 | 11 | 108,625,017 | 108,658,974 | 11q22.3 | 11q22.3  |
| LU12_L  | 10 | 1  | 1  | 108,628,252 | 99,944,725  | 1p13.3  | 1p21.2   |
| LU12_L  | 17 | 1  | 1  | 108,644,060 | 92,029,126  | 1p13.3  | 1p22.1   |
| LU12_L  | 7  | 1  | 1  | 108,645,357 | 100,347,708 | 1p13.3  | 1p21.2   |
| LU12_L  | 13 | 1  | 1  | 108,649,514 | 108,613,681 | 1p13.3  | 1p13.3   |
| LU8_L   | 4  | 11 | 11 | 108,658,974 | 108,625,017 | 11q22.3 | 11q22.3  |
| LU5_L   | 3  | 2  | 2  | 108,662,169 | 108,708,726 | 2q12.3  | 2q12.3   |
| LU12_L  | 17 | 1  | 1  | 108,665,028 | 90,941,331  | 1p13.3  | 1p22.2   |
| LU5_L   | 3  | 2  | 2  | 108,708,726 | 108,662,169 | 2q12.3  | 2q12.3   |
| LU12_L  | 9  | 1  | 1  | 108,747,688 | 86,853,860  | 1p13.3  | 1p22.3   |
| LU5_AD  | 3  | 1  | 1  | 108,748,882 | 108,925,974 | 1p13.3  | 1p13.3   |
| LU4_AD  | 3  | 1  | 1  | 108,766,561 | 147,709,838 | 1p13.3  | 1q21.2   |
| LU3_L   | 3  | 13 | 13 | 108,807,148 | 108,840,910 | 13q33.3 | 13q33.3  |
| LU3_L   | 3  | 13 | 13 | 108,840,910 | 108,807,148 | 13q33.3 | 13q33.3  |
| LU3_AD  | 3  | 2  | 2  | 108,906,783 | 108,942,635 | 2q12.3  | 2q12.3   |
| LU12_L  | 10 | 1  | 1  | 108,916,991 | 90,842,396  | 1p13.3  | 1p22.2   |
| LU20_AD | 3  | 1  | 1  | 108,919,674 | 146,051,333 | 1p13.3  | 1q21.1   |

|         |    |    |    |             |             |         |          |
|---------|----|----|----|-------------|-------------|---------|----------|
| LU5_AD  | 3  | 1  | 1  | 108,925,974 | 108,748,882 | 1p13.3  | 1p13.3   |
| LU12_L  | 8  | 1  | 1  | 108,933,648 | 109,290,550 | 1p13.3  | 1p13.3   |
| LU4_L   | 3  | 7  | 2  | 108,939,514 | 184,368,216 | 7q31.1  | 2q32.1   |
| LU3_AD  | 3  | 2  | 2  | 108,942,635 | 108,906,783 | 2q12.3  | 2q12.3   |
| LU3_AD  | 3  | 7  | 7  | 108,950,915 | 108,983,247 | 7q31.1  | 7q31.1   |
| LU20_AD | 3  | 11 | 11 | 108,975,665 | 109,008,138 | 11q22.3 | 11q22.3  |
| LU3_AD  | 3  | 7  | 7  | 108,983,247 | 108,950,915 | 7q31.1  | 7q31.1   |
| LU20_AD | 3  | 11 | 11 | 109,008,138 | 108,975,665 | 11q22.3 | 11q22.3  |
| LU12_L  | 12 | 1  | 1  | 109,040,833 | 109,319,397 | 1p13.3  | 1p13.3   |
| LU12_L  | 3  | 1  | 1  | 109,044,836 | 89,991,502  | 1p13.3  | 1p22.2   |
| LU12_L  | 24 | 1  | 1  | 109,045,596 | 109,822,962 | 1p13.3  | 1p13.3   |
| LU12_L  | 9  | 1  | 1  | 109,063,732 | 88,181,342  | 1p13.3  | 1p22.3   |
| LU5_L   | 3  | 5  | 5  | 109,098,309 | 109,132,618 | 5q21.3  | 5q21.3   |
| LU5_L   | 3  | 5  | 5  | 109,132,618 | 109,098,309 | 5q21.3  | 5q21.3   |
| LU16_L  | 3  | 2  | 23 | 109,140,491 | 114,775,443 | 2q12.3  | Xq23     |
| LU12_L  | 7  | 1  | 1  | 109,145,065 | 78,688,784  | 1p13.3  | 1p31.1   |
| LU18_L  | 4  | 2  | 20 | 109,145,111 | 58,130,742  | 2q12.3  | 20q13.32 |
| LU12_L  | 11 | 1  | 1  | 109,150,600 | 74,692,751  | 1p13.3  | 1p31.1   |
| LU12_L  | 13 | 1  | 1  | 109,201,996 | 84,037,861  | 1p13.3  | 1p31.1   |
| LU12_L  | 7  | 1  | 1  | 109,206,937 | 100,939,627 | 1p13.3  | 1p21.2   |
| LU12_L  | 4  | 1  | 1  | 109,207,005 | 76,794,180  | 1p13.3  | 1p31.1   |
| LU12_L  | 8  | 1  | 1  | 109,290,550 | 108,933,648 | 1p13.3  | 1p13.3   |
| LU5_L   | 30 | 8  | 8  | 109,295,989 | 109,417,481 | 8q23.1  | 8q23.1   |
| LU5_AD  | 19 | 8  | 8  | 109,296,509 | 109,418,212 | 8q23.1  | 8q23.1   |
| LU12_L  | 3  | 1  | 1  | 109,296,882 | 78,497,350  | 1p13.3  | 1p31.1   |
| LU12_L  | 12 | 1  | 1  | 109,319,397 | 109,040,833 | 1p13.3  | 1p13.3   |
| LU4_AD  | 4  | 11 | 11 | 109,364,233 | 107,105,003 | 11q22.3 | 11q22.3  |
| LU12_L  | 7  | 1  | 1  | 109,375,464 | 94,305,322  | 1p13.3  | 1p22.1   |
| LU12_L  | 15 | 1  | 1  | 109,389,522 | 87,724,065  | 1p13.3  | 1p22.3   |
| LU5_L   | 30 | 8  | 8  | 109,417,481 | 109,295,989 | 8q23.1  | 8q23.1   |
| LU5_AD  | 19 | 8  | 8  | 109,418,212 | 109,296,509 | 8q23.1  | 8q23.1   |
| LU12_L  | 13 | 1  | 1  | 109,446,540 | 96,823,140  | 1p13.3  | 1p21.3   |
| LU12_L  | 7  | 1  | 1  | 109,463,965 | 96,738,718  | 1p13.3  | 1p21.3   |
| LU12_L  | 9  | 1  | 1  | 109,539,020 | 83,440,557  | 1p13.3  | 1p31.1   |
| LU12_L  | 7  | 1  | 1  | 109,543,198 | 93,788,360  | 1p13.3  | 1p22.1   |
| LU12_L  | 10 | 1  | 1  | 109,543,641 | 88,607,029  | 1p13.3  | 1p22.2   |
| LU18_L  | 3  | 11 | 11 | 109,576,502 | 109,609,634 | 11q22.3 | 11q22.3  |
| LU12_L  | 5  | 1  | 1  | 109,588,301 | 79,224,864  | 1p13.3  | 1p31.1   |
| LU18_L  | 3  | 11 | 11 | 109,609,634 | 109,576,502 | 11q22.3 | 11q22.3  |
| LU12_L  | 5  | 1  | 1  | 109,623,435 | 89,457,151  | 1p13.3  | 1p22.2   |
| LU12_L  | 5  | 1  | 1  | 109,704,969 | 92,829,034  | 1p13.3  | 1p22.1   |
| LU12_L  | 6  | 1  | 1  | 109,726,256 | 89,097,312  | 1p13.3  | 1p22.2   |
| LU12_L  | 11 | 1  | 1  | 109,728,562 | 83,865,613  | 1p13.3  | 1p31.1   |
| LU20_AD | 4  | 13 | 13 | 109,745,511 | 31,822,811  | 13q33.3 | 13q12.3  |

|         |    |    |    |             |             |         |         |
|---------|----|----|----|-------------|-------------|---------|---------|
| LU12_L  | 8  | 1  | 1  | 109,791,643 | 91,273,341  | 1p13.3  | 1p22.2  |
| LU12_L  | 18 | 1  | 1  | 109,803,850 | 80,049,315  | 1p13.3  | 1p31.1  |
| LU11_AD | 6  | 1  | 1  | 109,815,215 | 47,596,788  | 1p13.3  | 1p33    |
| LU11_L  | 4  | 1  | 1  | 109,815,591 | 47,596,966  | 1p13.3  | 1p33    |
| LU11_L  | 5  | 1  | 1  | 109,818,885 | 17,051,882  | 1p13.3  | 1p36.13 |
| LU11_AD | 7  | 1  | 1  | 109,819,374 | 17,050,568  | 1p13.3  | 1p36.13 |
| LU12_L  | 9  | 1  | 1  | 109,820,768 | 88,504,721  | 1p13.3  | 1p22.2  |
| LU11_AD | 17 | 1  | 13 | 109,822,555 | 30,063,596  | 1p13.3  | 13q12.3 |
| LU12_L  | 24 | 1  | 1  | 109,822,962 | 109,045,596 | 1p13.3  | 1p13.3  |
| LU11_L  | 14 | 1  | 13 | 109,823,005 | 30,063,929  | 1p13.3  | 13q12.3 |
| LU12_L  | 5  | 1  | 1  | 109,863,977 | 79,952,298  | 1p13.3  | 1p31.1  |
| LU12_L  | 11 | 1  | 1  | 109,869,570 | 107,174,538 | 1p13.3  | 1p21.1  |
| LU3_AD  | 3  | 8  | 8  | 109,875,594 | 109,922,665 | 8q23.1  | 8q23.1  |
| LU12_L  | 9  | 1  | 1  | 109,894,766 | 100,167,335 | 1p13.3  | 1p21.2  |
| LU3_AD  | 4  | 3  | 3  | 109,898,640 | 109,929,222 | 3q13.13 | 3q13.13 |
| LU12_L  | 14 | 1  | 1  | 109,907,754 | 101,543,302 | 1p13.3  | 1p21.2  |
| LU12_L  | 16 | 1  | 1  | 109,914,678 | 88,841,459  | 1p13.3  | 1p22.2  |
| LU12_L  | 11 | 1  | 1  | 109,919,698 | 73,231,885  | 1p13.3  | 1p31.1  |
| LU3_AD  | 3  | 8  | 8  | 109,922,665 | 109,875,594 | 8q23.1  | 8q23.1  |
| LU3_AD  | 4  | 3  | 3  | 109,929,222 | 109,898,640 | 3q13.13 | 3q13.13 |
| LU16_L  | 4  | 1  | 1  | 109,966,678 | 103,300,360 | 1p13.3  | 1p21.1  |
| LU16_AD | 9  | 1  | 1  | 109,968,522 | 98,297,652  | 1p13.3  | 1p21.3  |
| LU16_L  | 5  | 1  | 1  | 109,969,104 | 98,296,336  | 1p13.3  | 1p21.3  |
| LU4_L   | 3  | 7  | 7  | 110,019,202 | 110,058,580 | 7q31.1  | 7q31.1  |
| LU4_L   | 3  | 7  | 7  | 110,058,580 | 110,019,202 | 7q31.1  | 7q31.1  |
| LU11_L  | 7  | 1  | 1  | 110,091,892 | 16,571,575  | 1p13.3  | 1p36.13 |
| LU11_AD | 10 | 1  | 1  | 110,092,118 | 16,571,538  | 1p13.3  | 1p36.13 |
| LU3_AD  | 3  | 13 | 13 | 110,143,315 | 110,173,350 | 13q33.3 | 13q33.3 |
| LU11_AD | 11 | 1  | 1  | 110,167,882 | 16,555,148  | 1p13.3  | 1p36.13 |
| LU11_L  | 5  | 1  | 1  | 110,171,291 | 16,554,128  | 1p13.3  | 1p36.13 |
| LU3_AD  | 3  | 13 | 13 | 110,173,350 | 110,143,315 | 13q33.3 | 13q33.3 |
| LU4_AD  | 4  | 6  | 1  | 110,198,905 | 170,909,985 | 6q21    | 1q24.3  |
| LU4_L   | 4  | 4  | 4  | 110,234,249 | 110,269,821 | 4q25    | 4q25    |
| LU4_AD  | 3  | 23 | 23 | 110,265,394 | 110,306,099 | Xq23    | Xq23    |
| LU4_AD  | 3  | 11 | 19 | 110,267,837 | 5,164,137   | 11q22.3 | 19p13.3 |
| LU4_L   | 4  | 4  | 4  | 110,269,821 | 110,234,249 | 4q25    | 4q25    |
| LU5_L   | 3  | 11 | 5  | 110,271,391 | 72,223,141  | 11q22.3 | 5q13.2  |
| LU4_AD  | 5  | 11 | 5  | 110,271,523 | 114,323,641 | 11q22.3 | 5q22.3  |
| LU4_AD  | 3  | 23 | 23 | 110,306,099 | 110,265,394 | Xq23    | Xq23    |
| LU18_AD | 5  | 23 | 23 | 110,344,069 | 110,378,699 | Xq23    | Xq23    |
| LU18_AD | 5  | 23 | 23 | 110,378,699 | 110,344,069 | Xq23    | Xq23    |
| LU18_AD | 3  | 9  | 9  | 110,494,950 | 122,365,712 | 9q31.2  | 9q33.1  |
| LU18_AD | 5  | 9  | 9  | 110,496,624 | 122,876,731 | 9q31.2  | 9q33.2  |
| LU3_L   | 3  | 11 | 11 | 110,533,049 | 110,566,934 | 11q23.1 | 11q23.1 |

|         |    |    |    |             |             |          |          |
|---------|----|----|----|-------------|-------------|----------|----------|
| LU21_AD | 4  | 12 | 20 | 110,540,948 | 36,394,284  | 12q24.11 | 20q11.23 |
| LU3_L   | 3  | 11 | 11 | 110,566,934 | 110,533,049 | 11q23.1  | 11q23.1  |
| LU3_AD  | 3  | 9  | 9  | 110,658,782 | 110,689,774 | 9q31.2   | 9q31.2   |
| LU20_AD | 3  | 3  | 3  | 110,664,936 | 110,697,122 | 3q13.13  | 3q13.13  |
| LU3_AD  | 3  | 9  | 9  | 110,689,774 | 110,658,782 | 9q31.2   | 9q31.2   |
| LU20_AD | 3  | 3  | 3  | 110,697,122 | 110,664,936 | 3q13.13  | 3q13.13  |
| LU21_AD | 4  | 8  | 8  | 110,786,480 | 110,824,533 | 8q23.2   | 8q23.2   |
| LU8_L   | 3  | 10 | 4  | 110,805,606 | 103,161,983 | 10q25.1  | 4q24     |
| LU3_AD  | 3  | 10 | 3  | 110,805,712 | 163,520,577 | 10q25.1  | 3q26.1   |
| LU18_L  | 5  | 6  | 12 | 110,820,567 | 103,059,319 | 6q21     | 12q23.2  |
| LU21_AD | 4  | 8  | 8  | 110,824,533 | 110,786,480 | 8q23.2   | 8q23.2   |
| LU6_L   | 4  | 6  | 12 | 110,824,879 | 103,057,126 | 6q21     | 12q23.2  |
| LU5_L   | 3  | 13 | 12 | 110,828,751 | 94,222,530  | 13q34    | 12q22    |
| LU18_L  | 6  | 9  | 9  | 110,829,355 | 112,690,596 | 9q31.2   | 9q31.3   |
| LU20_AD | 3  | 2  | 2  | 110,843,505 | 95,660,622  | 2q13     | 2q11.1   |
| LU4_AD  | 4  | 23 | 3  | 110,861,844 | 122,382,018 | Xq23     | 3q21.1   |
| LU12_L  | 9  | 8  | 8  | 110,927,832 | 128,452,258 | 8q23.2   | 8q24.21  |
| LU4_AD  | 3  | 9  | 9  | 110,954,946 | 110,989,289 | 9q31.2   | 9q31.2   |
| LU4_AD  | 3  | 9  | 9  | 110,989,289 | 110,954,946 | 9q31.2   | 9q31.2   |
| LU18_AD | 3  | 23 | 23 | 111,102,966 | 79,570,979  | Xq23     | Xq21.1   |
| LU20_AD | 4  | 5  | 5  | 111,105,621 | 111,138,045 | 5q22.1   | 5q22.1   |
| LU20_AD | 4  | 5  | 5  | 111,138,045 | 111,105,621 | 5q22.1   | 5q22.1   |
| LU3_AD  | 3  | 3  | 3  | 111,231,785 | 111,285,959 | 3q13.13  | 3q13.13  |
| LU11_AD | 14 | 12 | 12 | 111,284,239 | 67,478,791  | 12q24.11 | 12q14.3  |
| LU3_AD  | 3  | 3  | 3  | 111,285,959 | 111,231,785 | 3q13.13  | 3q13.13  |
| LU11_L  | 10 | 12 | 12 | 111,286,019 | 67,479,148  | 12q24.11 | 12q14.3  |
| LU7_L   | 3  | 6  | 6  | 111,452,454 | 106,680,467 | 6q21     | 6q21     |
| LU18_L  | 3  | 1  | 1  | 111,499,700 | 111,529,499 | 1p13.3   | 1p13.3   |
| LU18_L  | 3  | 1  | 1  | 111,529,499 | 111,499,700 | 1p13.3   | 1p13.3   |
| LU18_L  | 3  | 9  | 9  | 111,530,158 | 111,566,730 | 9q31.3   | 9q31.3   |
| LU18_L  | 3  | 9  | 9  | 111,566,730 | 111,530,158 | 9q31.3   | 9q31.3   |
| LU8_L   | 4  | 4  | 4  | 111,608,470 | 111,639,238 | 4q25     | 4q25     |
| LU8_L   | 4  | 4  | 4  | 111,639,238 | 111,608,470 | 4q25     | 4q25     |
| LU18_L  | 12 | 9  | 9  | 111,658,012 | 122,365,866 | 9q31.3   | 9q33.1   |
| LU3_L   | 3  | 13 | 8  | 111,707,786 | 55,841,847  | 13q34    | 8q12.1   |
| LU3_L   | 3  | 13 | 1  | 111,843,085 | 118,774,248 | 13q34    | 1p12     |
| LU7_AD  | 3  | 13 | 6  | 111,843,214 | 38,590,473  | 13q34    | 6p21.2   |
| LU12_L  | 4  | 13 | 6  | 111,843,771 | 72,498,992  | 13q34    | 6q13     |
| LU3_L   | 3  | 13 | 5  | 111,847,040 | 96,646,444  | 13q34    | 5q15     |
| LU12_L  | 3  | 13 | 17 | 111,849,296 | 52,406,044  | 13q34    | 17q22    |
| LU3_L   | 3  | 8  | 1  | 111,890,730 | 232,337,276 | 8q23.2   | 1q42.2   |
| LU20_AD | 6  | 9  | 9  | 111,940,263 | 112,032,858 | 9q31.3   | 9q31.3   |
| LU20_AD | 5  | 3  | 25 | 112,023,452 | 1,562,603   | 3q13.2   | 25       |
| LU20_AD | 6  | 9  | 9  | 112,032,858 | 111,940,263 | 9q31.3   | 9q31.3   |

|         |    |    |    |             |             |          |          |
|---------|----|----|----|-------------|-------------|----------|----------|
| LU11_L  | 12 | 12 | 12 | 112,039,229 | 49,881,779  | 12q24.12 | 12q13.12 |
| LU11_AD | 7  | 12 | 12 | 112,039,336 | 49,883,168  | 12q24.12 | 12q13.12 |
| LU11_L  | 19 | 12 | 12 | 112,044,090 | 49,965,786  | 12q24.12 | 12q13.12 |
| LU11_AD | 5  | 12 | 12 | 112,044,939 | 49,966,015  | 12q24.12 | 12q13.12 |
| LU7_L   | 4  | 11 | 5  | 112,053,491 | 37,505,772  | 11q23.1  | 5p13.2   |
| LU16_AD | 3  | 11 | 5  | 112,055,414 | 37,504,834  | 11q23.1  | 5p13.2   |
| LU11_AD | 6  | 12 | 12 | 112,075,877 | 49,558,197  | 12q24.12 | 12q13.12 |
| LU20_AD | 3  | 9  | 9  | 112,170,358 | 112,204,349 | 9q31.3   | 9q31.3   |
| LU20_AD | 3  | 9  | 9  | 112,204,349 | 112,170,358 | 9q31.3   | 9q31.3   |
| LU11_AD | 16 | 12 | 12 | 112,241,520 | 119,250,972 | 12q24.12 | 12q24.23 |
| LU11_L  | 10 | 12 | 12 | 112,245,347 | 119,249,102 | 12q24.12 | 12q24.23 |
| LU8_AD  | 3  | 3  | 11 | 112,245,854 | 58,432,327  | 3q13.2   | 11q12.1  |
| LU7_AD  | 3  | 2  | 2  | 112,352,205 | 112,482,637 | 2q13     | 2q13     |
| LU6_L   | 6  | 11 | 11 | 112,393,785 | 101,193,389 | 11q23.1  | 11q22.1  |
| LU18_L  | 3  | 1  | 1  | 112,407,389 | 112,457,064 | 1p13.2   | 1p13.2   |
| LU18_L  | 3  | 1  | 1  | 112,457,064 | 112,407,389 | 1p13.2   | 1p13.2   |
| LU7_AD  | 3  | 2  | 2  | 112,482,637 | 112,352,205 | 2q13     | 2q13     |
| LU6_L   | 3  | 1  | 1  | 112,504,422 | 112,543,477 | 1p13.2   | 1p13.2   |
| LU20_AD | 12 | 9  | 9  | 112,526,476 | 112,558,572 | 9q31.3   | 9q31.3   |
| LU6_L   | 3  | 1  | 1  | 112,543,477 | 112,504,422 | 1p13.2   | 1p13.2   |
| LU20_AD | 12 | 9  | 9  | 112,558,572 | 112,526,476 | 9q31.3   | 9q31.3   |
| LU3_AD  | 3  | 2  | 2  | 112,690,072 | 112,723,510 | 2q13     | 2q13     |
| LU18_L  | 6  | 9  | 9  | 112,690,596 | 110,829,355 | 9q31.3   | 9q31.2   |
| LU3_L   | 3  | 5  | 5  | 112,700,064 | 112,730,560 | 5q22.2   | 5q22.2   |
| LU3_AD  | 3  | 2  | 2  | 112,723,510 | 112,690,072 | 2q13     | 2q13     |
| LU3_L   | 3  | 5  | 5  | 112,730,560 | 112,700,064 | 5q22.2   | 5q22.2   |
| LU21_AD | 3  | 3  | 4  | 112,766,010 | 58,034,859  | 3q13.2   | 4q12     |
| LU3_L   | 3  | 11 | 3  | 112,798,588 | 46,469,829  | 11q23.2  | 3p21.31  |
| LU3_L   | 3  | 8  | 8  | 112,983,521 | 113,019,643 | 8q23.3   | 8q23.3   |
| LU3_L   | 3  | 8  | 8  | 113,019,643 | 112,983,521 | 8q23.3   | 8q23.3   |
| LU12_L  | 3  | 5  | 6  | 113,049,663 | 29,847,070  | 5q22.2   | 6p22.1   |
| LU18_AD | 5  | 6  | 6  | 113,071,167 | 113,112,899 | 6q21     | 6q21     |
| LU3_AD  | 3  | 23 | 23 | 113,076,023 | 113,116,027 | Xq23     | Xq23     |
| LU18_AD | 5  | 6  | 6  | 113,112,899 | 113,071,167 | 6q21     | 6q21     |
| LU3_AD  | 3  | 23 | 23 | 113,116,027 | 113,076,023 | Xq23     | Xq23     |
| LU6_AD  | 6  | 11 | 1  | 113,116,372 | 877,326     | 11q23.2  | 1p36.33  |
| LU6_L   | 7  | 11 | 1  | 113,117,768 | 876,006     | 11q23.2  | 1p36.33  |
| LU7_AD  | 4  | 2  | 2  | 113,142,708 | 88,082,236  | 2q13     | 2p11.2   |
| LU6_AD  | 12 | 11 | 11 | 113,175,506 | 66,131,639  | 11q23.2  | 11q13.2  |
| LU6_L   | 8  | 11 | 11 | 113,175,638 | 66,133,937  | 11q23.2  | 11q13.2  |
| LU14_AD | 3  | 4  | 4  | 113,301,511 | 113,336,097 | 4q25     | 4q25     |
| LU14_AD | 3  | 4  | 4  | 113,336,097 | 113,301,511 | 4q25     | 4q25     |
| LU20_L  | 3  | 23 | 23 | 113,336,985 | 113,371,989 | Xq23     | Xq23     |
| LU4_L   | 4  | 1  | 1  | 113,366,841 | 227,868,163 | 1p13.2   | 1q42.13  |

|         |    |    |    |             |             |          |          |
|---------|----|----|----|-------------|-------------|----------|----------|
| LU20_L  | 3  | 23 | 23 | 113,371,989 | 113,336,985 | Xq23     | Xq23     |
| LU12_L  | 5  | 5  | 11 | 113,485,802 | 43,183,867  | 5q22.3   | 11p12    |
| LU3_L   | 3  | 1  | 1  | 113,509,640 | 179,035,613 | 1p13.2   | 1q25.2   |
| LU8_L   | 3  | 6  | 2  | 113,543,482 | 46,985,656  | 6q21     | 2p21     |
| LU7_AD  | 4  | 6  | 2  | 113,545,109 | 46,984,013  | 6q21     | 2p21     |
| LU3_L   | 3  | 7  | 7  | 113,583,415 | 113,621,839 | 7q31.1   | 7q31.1   |
| LU3_L   | 3  | 7  | 7  | 113,621,839 | 113,583,415 | 7q31.1   | 7q31.1   |
| LU6_L   | 3  | 5  | 5  | 113,691,376 | 113,722,351 | 5q22.3   | 5q22.3   |
| LU6_L   | 3  | 5  | 5  | 113,722,351 | 113,691,376 | 5q22.3   | 5q22.3   |
| LU14_L  | 6  | 5  | 5  | 113,776,564 | 139,661,692 | 5q22.3   | 5q31.3   |
| LU14_AD | 3  | 5  | 5  | 113,780,255 | 139,663,074 | 5q22.3   | 5q31.3   |
| LU3_L   | 3  | 4  | 4  | 113,854,456 | 113,888,272 | 4q25     | 4q25     |
| LU11_AD | 3  | 2  | 2  | 113,881,724 | 118,850,594 | 2q13     | 2q14.2   |
| LU3_L   | 3  | 4  | 4  | 113,888,272 | 113,854,456 | 4q25     | 4q25     |
| LU8_AD  | 3  | 1  | 12 | 113,992,990 | 52,106,421  | 1p13.2   | 12q13.13 |
| LU20_AD | 4  | 1  | 6  | 113,993,045 | 48,116,548  | 1p13.2   | 6p12.3   |
| LU18_L  | 4  | 8  | 4  | 114,025,858 | 82,178,454  | 8q23.3   | 4q21.21  |
| LU18_L  | 3  | 11 | 15 | 114,219,934 | 51,651,580  | 11q23.2  | 15q21.2  |
| LU4_AD  | 5  | 5  | 11 | 114,323,641 | 110,271,523 | 5q22.3   | 11q22.3  |
| LU20_AD | 4  | 5  | 11 | 114,329,531 | 101,103,695 | 5q22.3   | 11q22.1  |
| LU5_L   | 4  | 5  | 11 | 114,331,406 | 101,101,925 | 5q22.3   | 11q22.1  |
| LU18_L  | 3  | 5  | 11 | 114,332,082 | 101,105,052 | 5q22.3   | 11q22.1  |
| LU14_L  | 3  | 5  | 7  | 114,333,254 | 91,081,231  | 5q22.3   | 7q21.13  |
| LU7_L   | 3  | 23 | 23 | 114,338,861 | 114,371,507 | Xq23     | Xq23     |
| LU18_L  | 3  | 12 | 12 | 114,366,194 | 114,400,483 | 12q24.21 | 12q24.21 |
| LU7_L   | 3  | 23 | 23 | 114,371,507 | 114,338,861 | Xq23     | Xq23     |
| LU3_L   | 5  | 5  | 18 | 114,373,650 | 10,216,442  | 5q22.3   | 18p11.22 |
| LU18_L  | 3  | 12 | 12 | 114,400,483 | 114,366,194 | 12q24.21 | 12q24.21 |
| LU18_L  | 3  | 5  | 2  | 114,417,304 | 209,259,270 | 5q22.3   | 2q34     |
| LU7_L   | 3  | 8  | 12 | 114,523,876 | 68,159,149  | 8q23.3   | 12q15    |
| LU3_L   | 3  | 7  | 7  | 114,704,472 | 114,734,269 | 7q31.2   | 7q31.2   |
| LU3_L   | 3  | 7  | 7  | 114,734,269 | 114,704,472 | 7q31.2   | 7q31.2   |
| LU11_AD | 76 | 12 | 20 | 114,742,337 | 55,558,391  | 12q24.21 | 20q13.31 |
| LU11_L  | 30 | 12 | 20 | 114,742,365 | 55,558,540  | 12q24.21 | 20q13.31 |
| LU3_L   | 4  | 23 | 1  | 114,773,210 | 227,872,617 | Xq23     | 1q42.13  |
| LU16_L  | 3  | 23 | 2  | 114,775,443 | 109,140,491 | Xq23     | 2q12.3   |
| LU7_AD  | 6  | 13 | 13 | 114,837,377 | 114,987,635 | 13q34    | 13q34    |
| LU7_L   | 12 | 13 | 13 | 114,837,644 | 114,987,049 | 13q34    | 13q34    |
| LU8_L   | 3  | 3  | 3  | 114,893,738 | 114,930,311 | 3q13.31  | 3q13.31  |
| LU4_L   | 3  | 10 | 10 | 114,914,623 | 114,951,748 | 10q25.3  | 10q25.3  |
| LU8_L   | 3  | 3  | 3  | 114,930,311 | 114,893,738 | 3q13.31  | 3q13.31  |
| LU21_L  | 3  | 2  | 2  | 114,950,974 | 114,983,716 | 2q14.1   | 2q14.1   |
| LU4_L   | 3  | 10 | 10 | 114,951,748 | 114,914,623 | 10q25.3  | 10q25.3  |
| LU12_L  | 4  | 4  | 12 | 114,971,955 | 51,299,558  | 4q26     | 12q13.12 |

|         |    |    |    |             |             |          |          |
|---------|----|----|----|-------------|-------------|----------|----------|
| LU21_L  | 3  | 2  | 2  | 114,983,716 | 114,950,974 | 2q14.1   | 2q14.1   |
| LU7_L   | 12 | 13 | 13 | 114,987,049 | 114,837,644 | 13q34    | 13q34    |
| LU7_AD  | 6  | 13 | 13 | 114,987,635 | 114,837,377 | 13q34    | 13q34    |
| LU12_L  | 6  | 23 | 12 | 115,033,923 | 68,941,175  | Xq23     | 12q15    |
| LU18_AD | 5  | 23 | 12 | 115,033,933 | 68,940,021  | Xq23     | 12q15    |
| LU3_L   | 5  | 23 | 12 | 115,035,656 | 68,938,832  | Xq23     | 12q15    |
| LU11_L  | 6  | 12 | 12 | 115,092,357 | 56,968,493  | 12q24.21 | 12q13.3  |
| LU18_L  | 3  | 23 | 1  | 115,126,707 | 104,923,957 | Xq23     | 1p21.1   |
| LU11_L  | 3  | 12 | 12 | 115,126,749 | 115,303,731 | 12q24.21 | 12q24.21 |
| LU11_L  | 8  | 12 | 12 | 115,138,941 | 56,965,073  | 12q24.21 | 12q13.3  |
| LU11_L  | 7  | 12 | 12 | 115,299,675 | 68,268,416  | 12q24.21 | 12q15    |
| LU11_L  | 3  | 12 | 12 | 115,303,731 | 115,126,749 | 12q24.21 | 12q24.21 |
| LU4_AD  | 3  | 23 | 7  | 115,375,840 | 82,264,352  | Xq23     | 7q21.11  |
| LU11_AD | 15 | 12 | 12 | 115,608,000 | 48,674,703  | 12q24.21 | 12q13.11 |
| LU11_L  | 4  | 12 | 12 | 115,609,584 | 48,675,419  | 12q24.21 | 12q13.11 |
| LU11_AD | 9  | 12 | 18 | 115,609,764 | 36,557,080  | 12q24.21 | 18q12.2  |
| LU15_AD | 3  | 23 | 1  | 115,875,205 | 89,393,875  | Xq23     | 1p22.2   |
| LU20_L  | 3  | 8  | 8  | 115,939,612 | 115,970,896 | 8q23.3   | 8q23.3   |
| LU20_L  | 3  | 8  | 8  | 115,970,896 | 115,939,612 | 8q23.3   | 8q23.3   |
| LU6_L   | 3  | 8  | 8  | 116,021,739 | 116,056,765 | 8q23.3   | 8q23.3   |
| LU6_L   | 3  | 8  | 8  | 116,056,765 | 116,021,739 | 8q23.3   | 8q23.3   |
| LU5_L   | 3  | 10 | 10 | 116,107,600 | 116,146,971 | 10q25.3  | 10q25.3  |
| LU5_L   | 3  | 10 | 10 | 116,146,971 | 116,107,600 | 10q25.3  | 10q25.3  |
| LU3_L   | 3  | 2  | 2  | 116,161,727 | 116,200,058 | 2q14.1   | 2q14.1   |
| LU3_L   | 3  | 2  | 2  | 116,200,058 | 116,161,727 | 2q14.1   | 2q14.1   |
| LU3_L   | 3  | 11 | 11 | 116,241,101 | 116,283,714 | 11q23.3  | 11q23.3  |
| LU3_L   | 3  | 4  | 4  | 116,274,857 | 116,305,244 | 4q26     | 4q26     |
| LU7_L   | 3  | 6  | 6  | 116,278,588 | 116,311,546 | 6q22.1   | 6q22.1   |
| LU3_L   | 3  | 11 | 11 | 116,283,714 | 116,241,101 | 11q23.3  | 11q23.3  |
| LU4_L   | 3  | 3  | 1  | 116,292,089 | 194,895,556 | 3q13.31  | 1q31.3   |
| LU3_L   | 3  | 4  | 4  | 116,305,244 | 116,274,857 | 4q26     | 4q26     |
| LU7_L   | 3  | 6  | 6  | 116,311,546 | 116,278,588 | 6q22.1   | 6q22.1   |
| LU3_AD  | 3  | 2  | 2  | 116,324,386 | 116,355,959 | 2q14.1   | 2q14.1   |
| LU3_AD  | 3  | 2  | 2  | 116,355,959 | 116,324,386 | 2q14.1   | 2q14.1   |
| LU3_L   | 3  | 3  | 3  | 116,363,398 | 172,138,482 | 3q13.31  | 3q26.31  |
| LU12_L  | 3  | 6  | 6  | 116,409,227 | 116,439,879 | 6q22.1   | 6q22.1   |
| LU12_L  | 20 | 8  | 8  | 116,426,853 | 53,473,729  | 8q23.3   | 8q11.23  |
| LU12_L  | 3  | 6  | 6  | 116,439,879 | 116,409,227 | 6q22.1   | 6q22.1   |
| LU4_L   | 25 | 23 | 23 | 116,482,135 | 116,584,801 | Xq23     | Xq24     |
| LU4_AD  | 24 | 23 | 23 | 116,490,968 | 116,578,753 | Xq23     | Xq24     |
| LU4_AD  | 24 | 23 | 23 | 116,578,753 | 116,490,968 | Xq24     | Xq23     |
| LU4_L   | 25 | 23 | 23 | 116,584,801 | 116,482,135 | Xq24     | Xq23     |
| LU18_L  | 3  | 5  | 1  | 116,635,892 | 235,304,418 | 5q23.1   | 1q42.3   |
| LU3_L   | 3  | 23 | 23 | 116,832,463 | 116,868,335 | Xq24     | Xq24     |



|         |    |    |    |             |             |          |          |
|---------|----|----|----|-------------|-------------|----------|----------|
| LU3_L   | 3  | 23 | 23 | 116,868,335 | 116,832,463 | Xq24     | Xq24     |
| LU4_AD  | 3  | 4  | 1  | 116,877,557 | 171,566,215 | 4q26     | 1q24.3   |
| LU11_AD | 20 | 1  | 13 | 116,890,558 | 21,293,961  | 1p13.1   | 13q12.11 |
| LU11_L  | 8  | 1  | 13 | 116,893,368 | 21,292,877  | 1p13.1   | 13q12.11 |
| LU3_L   | 3  | 3  | 3  | 117,001,964 | 117,031,723 | 3q13.31  | 3q13.31  |
| LU3_AD  | 6  | 8  | 8  | 117,008,313 | 117,046,076 | 8q23.3   | 8q23.3   |
| LU12_AD | 3  | 12 | 9  | 117,013,473 | 19,461,221  | 12q24.22 | 9p22.1   |
| LU3_L   | 3  | 3  | 3  | 117,031,723 | 117,001,964 | 3q13.31  | 3q13.31  |
| LU3_AD  | 6  | 8  | 8  | 117,046,076 | 117,008,313 | 8q23.3   | 8q23.3   |
| LU7_L   | 6  | 3  | 3  | 117,087,916 | 30,481,572  | 3q13.31  | 3p24.1   |
| LU4_L   | 3  | 23 | 23 | 117,117,024 | 117,147,280 | Xq24     | Xq24     |
| LU4_L   | 3  | 23 | 23 | 117,147,280 | 117,117,024 | Xq24     | Xq24     |
| LU11_AD | 11 | 12 | 12 | 117,347,411 | 48,514,791  | 12q24.22 | 12q13.11 |
| LU4_AD  | 3  | 6  | 6  | 117,357,813 | 117,387,656 | 6q22.1   | 6q22.1   |
| LU4_AD  | 3  | 6  | 6  | 117,387,656 | 117,357,813 | 6q22.1   | 6q22.1   |
| LU18_AD | 4  | 23 | 5  | 117,428,878 | 24,307,105  | Xq24     | 5p14.2   |
| LU3_L   | 3  | 3  | 3  | 117,576,757 | 117,610,739 | 3q13.32  | 3q13.32  |
| LU3_L   | 3  | 3  | 3  | 117,610,739 | 117,576,757 | 3q13.32  | 3q13.32  |
| LU18_L  | 3  | 6  | 12 | 117,753,060 | 69,050,387  | 6q22.1   | 12q15    |
| LU8_L   | 4  | 1  | 1  | 117,995,981 | 118,034,219 | 1p12     | 1p12     |
| LU8_L   | 4  | 1  | 1  | 118,034,219 | 117,995,981 | 1p12     | 1p12     |
| LU20_AD | 3  | 1  | 1  | 118,061,808 | 118,093,154 | 1p12     | 1p12     |
| LU20_AD | 3  | 1  | 1  | 118,093,154 | 118,061,808 | 1p12     | 1p12     |
| LU3_L   | 3  | 9  | 9  | 118,096,485 | 118,132,138 | 9q33.1   | 9q33.1   |
| LU3_L   | 3  | 9  | 9  | 118,132,138 | 118,096,485 | 9q33.1   | 9q33.1   |
| LU5_L   | 3  | 4  | 5  | 118,174,192 | 7,260,207   | 4q26     | 5p15.31  |
| LU14_L  | 3  | 12 | 12 | 118,201,330 | 118,231,756 | 12q24.23 | 12q24.23 |
| LU20_AD | 3  | 5  | 3  | 118,205,580 | 73,868,393  | 5q23.1   | 3p13     |
| LU14_L  | 3  | 12 | 12 | 118,231,756 | 118,201,330 | 12q24.23 | 12q24.23 |
| LU3_L   | 4  | 11 | 11 | 118,250,242 | 118,280,610 | 11q23.3  | 11q23.3  |
| LU3_L   | 4  | 11 | 11 | 118,280,610 | 118,250,242 | 11q23.3  | 11q23.3  |
| LU18_L  | 3  | 8  | 8  | 118,717,359 | 118,749,152 | 8q24.11  | 8q24.11  |
| LU18_L  | 3  | 8  | 8  | 118,749,152 | 118,717,359 | 8q24.11  | 8q24.11  |
| LU21_AD | 3  | 1  | 4  | 118,773,236 | 102,554,044 | 1p12     | 4q24     |
| LU3_L   | 3  | 1  | 13 | 118,774,248 | 111,843,085 | 1p12     | 13q34    |
| LU18_AD | 5  | 6  | 6  | 118,812,107 | 118,851,699 | 6q22.31  | 6q22.31  |
| LU11_AD | 3  | 2  | 2  | 118,850,594 | 113,881,724 | 2q14.2   | 2q13     |
| LU18_AD | 5  | 6  | 6  | 118,851,699 | 118,812,107 | 6q22.31  | 6q22.31  |
| LU12_AD | 4  | 6  | 19 | 118,905,200 | 28,370,893  | 6q22.31  | 19q11    |
| LU12_L  | 5  | 12 | 23 | 118,918,914 | 42,628,842  | 12q24.23 | Xp11.3   |
| LU11_AD | 38 | 12 | 12 | 118,980,076 | 108,061,434 | 12q24.23 | 12q23.3  |
| LU11_L  | 11 | 12 | 12 | 118,982,092 | 108,059,141 | 12q24.23 | 12q23.3  |
| LU11_L  | 3  | 12 | 12 | 118,993,403 | 108,052,967 | 12q24.23 | 12q23.3  |
| LU4_L   | 3  | 6  | 6  | 119,121,459 | 119,151,674 | 6q22.31  | 6q22.31  |

|         |    |    |    |             |             |          |          |
|---------|----|----|----|-------------|-------------|----------|----------|
| LU4_L   | 3  | 6  | 6  | 119,151,674 | 119,121,459 | 6q22.31  | 6q22.31  |
| LU18_AD | 3  | 2  | 2  | 119,161,792 | 119,195,759 | 2q14.2   | 2q14.2   |
| LU18_AD | 3  | 2  | 2  | 119,195,759 | 119,161,792 | 2q14.2   | 2q14.2   |
| LU12_AD | 3  | 23 | 25 | 119,214,678 | 1,559,484   | Xq24     | 25       |
| LU3_AD  | 4  | 8  | 6  | 119,240,584 | 57,254,007  | 8q24.12  | 6p11.2   |
| LU11_L  | 10 | 12 | 12 | 119,249,102 | 112,245,347 | 12q24.23 | 12q24.12 |
| LU11_AD | 16 | 12 | 12 | 119,250,972 | 112,241,520 | 12q24.23 | 12q24.12 |
| LU20_AD | 3  | 2  | 2  | 119,276,148 | 119,313,194 | 2q14.2   | 2q14.2   |
| LU16_AD | 3  | 23 | 7  | 119,283,273 | 50,109,580  | Xq24     | 7p12.2   |
| LU5_AD  | 3  | 10 | 10 | 119,290,454 | 119,345,074 | 10q26.11 | 10q26.11 |
| LU20_AD | 3  | 2  | 2  | 119,313,194 | 119,276,148 | 2q14.2   | 2q14.2   |
| LU5_AD  | 3  | 10 | 10 | 119,345,074 | 119,290,454 | 10q26.11 | 10q26.11 |
| LU21_L  | 4  | 2  | 2  | 119,479,433 | 119,511,443 | 2q14.2   | 2q14.2   |
| LU21_L  | 4  | 2  | 2  | 119,511,443 | 119,479,433 | 2q14.2   | 2q14.2   |
| LU7_AD  | 3  | 4  | 19 | 119,524,869 | 225,556     | 4q26     | 19p13.3  |
| LU12_L  | 3  | 4  | 19 | 119,539,508 | 211,211     | 4q26     | 19p13.3  |
| LU20_L  | 3  | 9  | 9  | 119,564,322 | 119,620,405 | 9q33.1   | 9q33.1   |
| LU6_L   | 3  | 4  | 2  | 119,596,773 | 243,152,897 | 4q26     | 2q37.3   |
| LU6_AD  | 3  | 4  | 2  | 119,597,340 | 243,154,236 | 4q26     | 2q37.3   |
| LU20_L  | 3  | 9  | 9  | 119,620,405 | 119,564,322 | 9q33.1   | 9q33.1   |
| LU12_L  | 12 | 8  | 8  | 119,626,357 | 121,070,333 | 8q24.12  | 8q24.12  |
| LU18_AD | 3  | 2  | 6  | 119,709,605 | 89,432,343  | 2q14.2   | 6q15     |
| LU20_AD | 3  | 1  | 10 | 119,719,571 | 5,097,194   | 1p12     | 10p15.1  |
| LU20_AD | 3  | 1  | 2  | 119,724,618 | 33,883,635  | 1p12     | 2p22.3   |
| LU20_AD | 4  | 2  | 2  | 119,860,918 | 119,891,171 | 2q14.2   | 2q14.2   |
| LU20_AD | 4  | 2  | 2  | 119,891,171 | 119,860,918 | 2q14.2   | 2q14.2   |
| LU18_AD | 6  | 9  | 9  | 119,904,908 | 122,367,382 | 9q33.1   | 9q33.1   |
| LU18_L  | 10 | 9  | 9  | 119,905,281 | 122,367,794 | 9q33.1   | 9q33.1   |
| LU4_AD  | 14 | 1  | 1  | 119,954,506 | 86,519,424  | 1p12     | 1p22.3   |
| LU4_L   | 6  | 1  | 1  | 119,955,980 | 86,518,388  | 1p12     | 1p22.3   |
| LU3_L   | 7  | 10 | 8  | 119,981,475 | 61,597,624  | 10q26.11 | 8q12.2   |
| LU18_L  | 3  | 5  | 2  | 120,034,275 | 207,670,846 | 5q23.1   | 2q33.3   |
| LU15_L  | 10 | 10 | 9  | 120,042,093 | 98,923,174  | 10q26.11 | 9q22.32  |
| LU12_AD | 3  | 10 | 10 | 120,086,628 | 120,128,924 | 10q26.11 | 10q26.11 |
| LU12_AD | 3  | 10 | 10 | 120,128,924 | 120,086,628 | 10q26.11 | 10q26.11 |
| LU21_AD | 3  | 2  | 4  | 120,134,078 | 165,671,337 | 2q14.2   | 4q32.3   |
| LU8_L   | 4  | 1  | 1  | 120,151,906 | 120,187,348 | 1p12     | 1p12     |
| LU8_L   | 4  | 1  | 1  | 120,187,348 | 120,151,906 | 1p12     | 1p12     |
| LU18_AD | 4  | 5  | 15 | 120,373,080 | 23,000,240  | 5q23.1   | 15q11.2  |
| LU18_L  | 3  | 5  | 15 | 120,373,304 | 22,999,904  | 5q23.1   | 15q11.2  |
| LU18_L  | 6  | 9  | 9  | 120,454,190 | 122,115,443 | 9q33.1   | 9q33.1   |
| LU5_L   | 3  | 1  | 1  | 120,532,906 | 21,792,590  | 1p12     | 1p36.12  |
| LU4_L   | 3  | 1  | 1  | 120,533,045 | 21,793,287  | 1p12     | 1p36.12  |
| LU16_AD | 5  | 2  | 2  | 120,548,154 | 120,578,101 | 2q14.2   | 2q14.2   |

|         |    |    |    |             |             |         |         |
|---------|----|----|----|-------------|-------------|---------|---------|
| LU3_L   | 3  | 11 | 11 | 120,560,699 | 120,591,224 | 11q23.3 | 11q23.3 |
| LU16_AD | 5  | 2  | 2  | 120,578,101 | 120,548,154 | 2q14.2  | 2q14.2  |
| LU3_L   | 3  | 23 | 2  | 120,587,973 | 169,114,096 | Xq24    | 2q24.3  |
| LU3_L   | 3  | 11 | 11 | 120,591,224 | 120,560,699 | 11q23.3 | 11q23.3 |
| LU3_L   | 4  | 3  | 3  | 120,641,570 | 120,683,447 | 3q13.33 | 3q13.33 |
| LU14_L  | 13 | 1  | 5  | 120,672,931 | 5,173,032   | 1p11.2  | 5p15.32 |
| LU14_AD | 20 | 1  | 5  | 120,673,427 | 5,171,495   | 1p11.2  | 5p15.32 |
| LU3_L   | 4  | 3  | 3  | 120,683,447 | 120,641,570 | 3q13.33 | 3q13.33 |
| LU18_L  | 3  | 5  | 5  | 120,777,592 | 120,813,963 | 5q23.1  | 5q23.1  |
| LU18_L  | 3  | 5  | 5  | 120,813,963 | 120,777,592 | 5q23.1  | 5q23.1  |
| LU3_AD  | 3  | 4  | 4  | 120,822,571 | 120,854,643 | 4q27    | 4q27    |
| LU4_AD  | 4  | 2  | 2  | 120,837,098 | 120,866,904 | 2q14.2  | 2q14.2  |
| LU3_AD  | 3  | 4  | 4  | 120,854,643 | 120,822,571 | 4q27    | 4q27    |
| LU4_AD  | 4  | 2  | 2  | 120,866,904 | 120,837,098 | 2q14.2  | 2q14.2  |
| LU14_L  | 5  | 1  | 5  | 120,892,978 | 9,321,852   | 1p11.2  | 5p15.31 |
| LU14_AD | 14 | 1  | 5  | 120,893,079 | 9,320,976   | 1p11.2  | 5p15.31 |
| LU21_AD | 5  | 4  | 4  | 121,044,292 | 73,038,589  | 4q27    | 4q13.3  |
| LU12_L  | 10 | 8  | 8  | 121,067,030 | 133,280,200 | 8q24.12 | 8q24.22 |
| LU4_L   | 3  | 3  | 2  | 121,070,104 | 226,972,848 | 3q13.33 | 2q36.3  |
| LU12_L  | 12 | 8  | 8  | 121,070,333 | 119,626,357 | 8q24.12 | 8q24.12 |
| LU4_L   | 4  | 3  | 3  | 121,084,948 | 121,114,484 | 3q13.33 | 3q13.33 |
| LU18_AD | 3  | 3  | 9  | 121,113,082 | 134,560,030 | 3q13.33 | 9q34.13 |
| LU4_L   | 4  | 3  | 3  | 121,114,484 | 121,084,948 | 3q13.33 | 3q13.33 |
| LU11_AD | 3  | 4  | 4  | 121,156,058 | 121,187,069 | 4q27    | 4q27    |
| LU12_L  | 5  | 8  | 8  | 121,185,493 | 121,232,299 | 8q24.12 | 8q24.12 |
| LU11_AD | 3  | 4  | 4  | 121,187,069 | 121,156,058 | 4q27    | 4q27    |
| LU15_L  | 6  | 5  | 12 | 121,192,414 | 94,750,216  | 5q23.1  | 12q22   |
| LU12_L  | 5  | 8  | 8  | 121,232,299 | 121,185,493 | 8q24.12 | 8q24.12 |
| LU3_L   | 3  | 4  | 10 | 121,263,909 | 71,911,758  | 4q27    | 10q22.1 |
| LU3_AD  | 4  | 9  | 3  | 121,395,615 | 184,823,773 | 9q33.1  | 3q27.2  |
| LU4_AD  | 5  | 9  | 3  | 121,399,349 | 184,823,994 | 9q33.1  | 3q27.2  |
| LU20_AD | 4  | 5  | 5  | 121,426,415 | 134,344,917 | 5q23.2  | 5q31.1  |
| LU20_AD | 3  | 11 | 5  | 121,510,179 | 97,420,142  | 11q24.1 | 5q15    |
| LU18_L  | 5  | 9  | 17 | 121,524,729 | 66,237,491  | 9q33.1  | 17q24.2 |
| LU18_AD | 3  | 7  | 7  | 121,690,416 | 121,723,472 | 7q31.32 | 7q31.32 |
| LU18_AD | 3  | 7  | 7  | 121,723,472 | 121,690,416 | 7q31.32 | 7q31.32 |
| LU3_L   | 9  | 9  | 9  | 121,952,240 | 121,984,480 | 9q33.1  | 9q33.1  |
| LU3_L   | 3  | 5  | 3  | 121,954,719 | 97,911,746  | 5q23.2  | 3q11.2  |
| LU3_L   | 9  | 9  | 9  | 121,984,480 | 121,952,240 | 9q33.1  | 9q33.1  |
| LU4_L   | 4  | 3  | 3  | 121,985,041 | 122,020,985 | 3q21.1  | 3q21.1  |
| LU4_L   | 4  | 3  | 3  | 122,020,985 | 121,985,041 | 3q21.1  | 3q21.1  |
| LU18_L  | 6  | 9  | 9  | 122,115,443 | 120,454,190 | 9q33.1  | 9q33.1  |
| LU18_L  | 5  | 9  | 9  | 122,141,505 | 122,925,730 | 9q33.1  | 9q33.2  |
| LU21_AD | 3  | 6  | 6  | 122,142,175 | 122,176,869 | 6q22.31 | 6q22.31 |

|         |    |    |    |             |             |          |          |
|---------|----|----|----|-------------|-------------|----------|----------|
| LU21_AD | 3  | 6  | 6  | 122,176,869 | 122,142,175 | 6q22.31  | 6q22.31  |
| LU18_L  | 6  | 9  | 9  | 122,191,042 | 130,384,599 | 9q33.1   | 9q34.11  |
| LU6_L   | 3  | 7  | 7  | 122,322,570 | 122,353,514 | 7q31.32  | 7q31.32  |
| LU3_AD  | 3  | 4  | 4  | 122,332,946 | 122,405,589 | 4q27     | 4q27     |
| LU6_L   | 3  | 7  | 7  | 122,353,514 | 122,322,570 | 7q31.32  | 7q31.32  |
| LU6_L   | 39 | 11 | 11 | 122,360,077 | 66,177,930  | 11q24.1  | 11q13.2  |
| LU18_AD | 3  | 9  | 9  | 122,365,712 | 110,494,950 | 9q33.1   | 9q31.2   |
| LU18_L  | 12 | 9  | 9  | 122,365,866 | 111,658,012 | 9q33.1   | 9q31.3   |
| LU18_AD | 6  | 9  | 9  | 122,367,382 | 119,904,908 | 9q33.1   | 9q33.1   |
| LU18_L  | 10 | 9  | 9  | 122,367,794 | 119,905,281 | 9q33.1   | 9q33.1   |
| LU4_AD  | 4  | 3  | 23 | 122,382,018 | 110,861,844 | 3q21.1   | Xq23     |
| LU3_AD  | 3  | 4  | 4  | 122,405,589 | 122,332,946 | 4q27     | 4q27     |
| LU20_L  | 3  | 9  | 9  | 122,420,362 | 122,473,305 | 9q33.1   | 9q33.1   |
| LU3_L   | 3  | 5  | 5  | 122,468,455 | 122,500,376 | 5q23.2   | 5q23.2   |
| LU20_L  | 3  | 9  | 9  | 122,473,305 | 122,420,362 | 9q33.1   | 9q33.1   |
| LU3_L   | 3  | 5  | 5  | 122,500,376 | 122,468,455 | 5q23.2   | 5q23.2   |
| LU14_L  | 5  | 9  | 9  | 122,588,751 | 122,621,021 | 9q33.2   | 9q33.2   |
| LU14_L  | 5  | 9  | 9  | 122,621,021 | 122,588,751 | 9q33.2   | 9q33.2   |
| LU18_AD | 5  | 9  | 9  | 122,876,731 | 110,496,624 | 9q33.2   | 9q31.2   |
| LU4_AD  | 3  | 10 | 10 | 122,879,619 | 122,911,308 | 10q26.12 | 10q26.12 |
| LU14_L  | 3  | 4  | 4  | 122,906,536 | 163,980,778 | 4q27     | 4q32.2   |
| LU4_AD  | 3  | 10 | 10 | 122,911,308 | 122,879,619 | 10q26.12 | 10q26.12 |
| LU5_L   | 4  | 6  | 6  | 122,917,133 | 145,889,956 | 6q22.31  | 6q24.3   |
| LU18_L  | 5  | 9  | 9  | 122,925,730 | 122,141,505 | 9q33.2   | 9q33.1   |
| LU5_L   | 3  | 10 | 10 | 123,036,113 | 123,069,330 | 10q26.12 | 10q26.12 |
| LU6_L   | 8  | 11 | 11 | 123,041,097 | 125,324,756 | 11q24.1  | 11q24.2  |
| LU18_AD | 4  | 6  | 12 | 123,065,820 | 74,663,418  | 6q22.31  | 12q21.1  |
| LU14_AD | 4  | 6  | 4  | 123,068,354 | 138,402,200 | 6q22.31  | 4q28.3   |
| LU15_AD | 3  | 6  | 12 | 123,069,148 | 74,661,691  | 6q22.31  | 12q21.1  |
| LU5_L   | 3  | 10 | 10 | 123,069,330 | 123,036,113 | 10q26.12 | 10q26.12 |
| LU3_L   | 3  | 5  | 5  | 123,367,512 | 123,415,905 | 5q23.2   | 5q23.2   |
| LU3_L   | 3  | 5  | 5  | 123,415,905 | 123,367,512 | 5q23.2   | 5q23.2   |
| LU4_AD  | 3  | 2  | 2  | 123,667,891 | 123,705,600 | 2q14.3   | 2q14.3   |
| LU4_AD  | 3  | 2  | 2  | 123,705,600 | 123,667,891 | 2q14.3   | 2q14.3   |
| LU3_L   | 4  | 4  | 4  | 123,886,151 | 123,916,744 | 4q28.1   | 4q28.1   |
| LU3_L   | 4  | 4  | 4  | 123,916,744 | 123,886,151 | 4q28.1   | 4q28.1   |
| LU4_AD  | 4  | 8  | 8  | 123,928,606 | 123,976,375 | 8q24.13  | 8q24.13  |
| LU4_AD  | 4  | 8  | 8  | 123,976,375 | 123,928,606 | 8q24.13  | 8q24.13  |
| LU3_L   | 3  | 12 | 3  | 124,035,534 | 38,339,517  | 12q24.31 | 3p22.2   |
| LU5_L   | 3  | 12 | 12 | 124,526,627 | 124,718,914 | 12q24.31 | 12q24.31 |
| LU4_L   | 4  | 10 | 10 | 124,532,422 | 124,573,096 | 10q26.13 | 10q26.13 |
| LU4_L   | 4  | 10 | 10 | 124,573,096 | 124,532,422 | 10q26.13 | 10q26.13 |
| LU3_L   | 3  | 23 | 20 | 124,700,471 | 13,932,591  | Xq25     | 20p12.1  |
| LU5_L   | 3  | 12 | 12 | 124,718,914 | 124,526,627 | 12q24.31 | 12q24.31 |

|         |    |    |    |             |             |          |          |
|---------|----|----|----|-------------|-------------|----------|----------|
| LU18_AD | 4  | 9  | 9  | 124,782,307 | 124,840,428 | 9q33.2   | 9q33.2   |
| LU3_AD  | 3  | 9  | 9  | 124,803,035 | 124,832,554 | 9q33.2   | 9q33.2   |
| LU3_AD  | 3  | 9  | 9  | 124,832,554 | 124,803,035 | 9q33.2   | 9q33.2   |
| LU18_AD | 4  | 9  | 9  | 124,840,428 | 124,782,307 | 9q33.2   | 9q33.2   |
| LU4_AD  | 3  | 4  | 4  | 124,935,452 | 124,983,660 | 4q28.1   | 4q28.1   |
| LU11_AD | 17 | 2  | 2  | 124,951,130 | 60,432,276  | 2q14.3   | 2p16.1   |
| LU11_AD | 3  | 2  | 2  | 124,954,660 | 61,116,819  | 2q14.3   | 2p16.1   |
| LU11_AD | 3  | 2  | 2  | 124,957,141 | 61,163,918  | 2q14.3   | 2p16.1   |
| LU4_AD  | 3  | 4  | 4  | 124,983,660 | 124,935,452 | 4q28.1   | 4q28.1   |
| LU4_L   | 3  | 23 | 23 | 124,986,262 | 125,020,704 | Xq25     | Xq25     |
| LU4_L   | 3  | 23 | 23 | 125,020,704 | 124,986,262 | Xq25     | Xq25     |
| LU4_AD  | 5  | 6  | 6  | 125,072,400 | 125,106,059 | 6q22.31  | 6q22.31  |
| LU18_L  | 4  | 7  | 12 | 125,097,073 | 69,378,422  | 7q31.33  | 12q15    |
| LU4_AD  | 5  | 6  | 6  | 125,106,059 | 125,072,400 | 6q22.31  | 6q22.31  |
| LU8_L   | 3  | 7  | 7  | 125,222,198 | 125,255,822 | 7q31.33  | 7q31.33  |
| LU3_L   | 5  | 5  | 5  | 125,231,382 | 125,265,901 | 5q23.2   | 5q23.2   |
| LU8_L   | 3  | 7  | 7  | 125,255,822 | 125,222,198 | 7q31.33  | 7q31.33  |
| LU3_L   | 5  | 5  | 5  | 125,265,901 | 125,231,382 | 5q23.2   | 5q23.2   |
| LU12_L  | 3  | 9  | 9  | 125,299,079 | 80,795,932  | 9q33.2   | 9q21.2   |
| LU6_L   | 8  | 11 | 11 | 125,324,756 | 123,041,097 | 11q24.2  | 11q24.1  |
| LU21_L  | 3  | 9  | 9  | 125,358,068 | 125,388,073 | 9q33.2   | 9q33.2   |
| LU21_L  | 3  | 9  | 9  | 125,388,073 | 125,358,068 | 9q33.2   | 9q33.2   |
| LU7_AD  | 4  | 3  | 2  | 125,413,697 | 159,738,817 | 3q21.2   | 2q24.1   |
| LU4_L   | 3  | 9  | 4  | 125,426,208 | 131,399,921 | 9q33.2   | 4q28.3   |
| LU18_L  | 3  | 3  | 13 | 125,428,159 | 68,479,596  | 3q21.2   | 13q21.32 |
| LU4_AD  | 3  | 9  | 2  | 125,449,309 | 171,906,735 | 9q33.2   | 2q31.1   |
| LU8_AD  | 3  | 5  | 5  | 125,508,610 | 125,539,925 | 5q23.2   | 5q23.2   |
| LU8_AD  | 3  | 5  | 5  | 125,539,925 | 125,508,610 | 5q23.2   | 5q23.2   |
| LU18_AD | 17 | 5  | 14 | 125,548,314 | 55,115,379  | 5q23.2   | 14q22.2  |
| LU18_L  | 8  | 5  | 14 | 125,550,076 | 55,115,736  | 5q23.2   | 14q22.2  |
| LU11_AD | 4  | 5  | 7  | 125,557,443 | 82,274,949  | 5q23.2   | 7q21.11  |
| LU14_AD | 4  | 10 | 1  | 125,557,657 | 207,194,662 | 10q26.13 | 1q32.1   |
| LU12_L  | 3  | 3  | 8  | 125,585,319 | 10,430,650  | 3q21.2   | 8p23.1   |
| LU18_AD | 6  | 5  | 5  | 125,625,390 | 129,721,267 | 5q23.2   | 5q23.3   |
| LU3_L   | 3  | 9  | 19 | 125,664,613 | 5,829,600   | 9q33.2   | 19p13.3  |
| LU18_L  | 13 | 5  | 5  | 125,677,439 | 130,962,080 | 5q23.2   | 5q31.1   |
| LU18_AD | 4  | 5  | 5  | 125,678,232 | 130,961,887 | 5q23.2   | 5q31.1   |
| LU20_AD | 4  | 9  | 17 | 125,720,358 | 46,138,314  | 9q33.2   | 17q21.32 |
| LU3_AD  | 3  | 3  | 3  | 125,728,803 | 125,762,359 | 3q21.2   | 3q21.2   |
| LU3_AD  | 3  | 3  | 3  | 125,762,359 | 125,728,803 | 3q21.2   | 3q21.2   |
| LU18_L  | 7  | 7  | 7  | 125,862,679 | 81,874,811  | 7q31.33  | 7q21.11  |
| LU18_AD | 6  | 7  | 7  | 125,863,978 | 81,874,422  | 7q31.33  | 7q21.11  |
| LU6_L   | 11 | 11 | 11 | 125,884,738 | 129,522,107 | 11q24.2  | 11q24.3  |
| LU6_L   | 68 | 11 | 11 | 125,969,979 | 68,318,699  | 11q24.2  | 11q13.2  |

|         |    |    |    |             |             |          |          |
|---------|----|----|----|-------------|-------------|----------|----------|
| LU7_AD  | 5  | 12 | 10 | 126,352,808 | 50,894,087  | 12q24.32 | 10q11.23 |
| LU20_AD | 4  | 5  | 5  | 126,378,962 | 126,414,186 | 5q23.2   | 5q23.2   |
| LU20_AD | 4  | 5  | 5  | 126,414,186 | 126,378,962 | 5q23.2   | 5q23.2   |
| LU3_L   | 5  | 8  | 22 | 126,533,223 | 29,065,460  | 8q24.13  | 22q12.1  |
| LU3_AD  | 16 | 8  | 22 | 126,533,705 | 29,065,206  | 8q24.13  | 22q12.1  |
| LU18_AD | 4  | 3  | 3  | 126,640,000 | 126,669,822 | 3q21.3   | 3q21.3   |
| LU20_L  | 4  | 11 | 11 | 126,648,381 | 126,684,264 | 11q24.2  | 11q24.2  |
| LU18_AD | 4  | 3  | 3  | 126,669,822 | 126,640,000 | 3q21.3   | 3q21.3   |
| LU20_L  | 4  | 11 | 11 | 126,684,264 | 126,648,381 | 11q24.2  | 11q24.2  |
| LU4_AD  | 3  | 8  | 8  | 126,743,590 | 126,775,122 | 8q24.13  | 8q24.13  |
| LU4_AD  | 3  | 8  | 8  | 126,775,122 | 126,743,590 | 8q24.13  | 8q24.13  |
| LU21_AD | 4  | 3  | 20 | 126,880,110 | 59,793,396  | 3q21.3   | 20q13.33 |
| LU6_L   | 3  | 5  | 16 | 126,928,044 | 57,877,261  | 5q23.2   | 16q21    |
| LU12_L  | 3  | 5  | 6  | 127,010,127 | 84,069,994  | 5q23.2   | 6q14.2   |
| LU21_AD | 3  | 4  | 7  | 127,055,515 | 94,351,791  | 4q28.1   | 7q21.3   |
| LU18_L  | 14 | 4  | 5  | 127,055,732 | 1,579,402   | 4q28.1   | 5p15.33  |
| LU12_AD | 3  | 4  | 6  | 127,070,237 | 131,658,543 | 4q28.1   | 6q23.2   |
| LU12_L  | 27 | 8  | 8  | 127,081,114 | 129,263,976 | 8q24.13  | 8q24.21  |
| LU12_L  | 19 | 8  | 8  | 127,083,056 | 135,761,750 | 8q24.13  | 8q24.22  |
| LU6_L   | 6  | 5  | 16 | 127,123,161 | 75,495,173  | 5q23.2   | 16q23.1  |
| LU16_AD | 3  | 12 | 12 | 127,149,743 | 127,182,568 | 12q24.32 | 12q24.32 |
| LU16_AD | 3  | 12 | 12 | 127,182,568 | 127,149,743 | 12q24.32 | 12q24.32 |
| LU14_L  | 3  | 2  | 2  | 127,255,110 | 127,291,070 | 2q14.3   | 2q14.3   |
| LU14_L  | 3  | 2  | 2  | 127,291,070 | 127,255,110 | 2q14.3   | 2q14.3   |
| LU4_L   | 3  | 23 | 23 | 127,346,645 | 127,380,314 | Xq25     | Xq25     |
| LU4_L   | 3  | 23 | 23 | 127,380,314 | 127,346,645 | Xq25     | Xq25     |
| LU3_L   | 5  | 5  | 5  | 127,543,346 | 127,583,680 | 5q23.3   | 5q23.3   |
| LU12_L  | 3  | 5  | 11 | 127,559,207 | 19,003,185  | 5q23.3   | 11p15.1  |
| LU3_L   | 5  | 5  | 5  | 127,583,680 | 127,543,346 | 5q23.3   | 5q23.3   |
| LU18_AD | 3  | 5  | 5  | 127,843,681 | 127,882,615 | 5q23.3   | 5q23.3   |
| LU18_AD | 3  | 5  | 5  | 127,882,615 | 127,843,681 | 5q23.3   | 5q23.3   |
| LU16_L  | 4  | 7  | 3  | 127,901,325 | 9,534,211   | 7q32.1   | 3p25.3   |
| LU18_AD | 3  | 6  | 6  | 128,005,720 | 128,042,126 | 6q22.33  | 6q22.33  |
| LU8_AD  | 14 | 23 | 23 | 128,019,615 | 128,052,745 | Xq25     | Xq25     |
| LU18_AD | 3  | 6  | 6  | 128,042,126 | 128,005,720 | 6q22.33  | 6q22.33  |
| LU8_AD  | 14 | 23 | 23 | 128,052,745 | 128,019,615 | Xq25     | Xq25     |
| LU8_L   | 3  | 23 | 23 | 128,137,793 | 128,176,818 | Xq25     | Xq25     |
| LU8_L   | 3  | 23 | 23 | 128,176,818 | 128,137,793 | Xq25     | Xq25     |
| LU12_L  | 17 | 8  | 8  | 128,242,877 | 135,760,690 | 8q24.21  | 8q24.22  |
| LU18_L  | 4  | 8  | 1  | 128,426,699 | 155,404,106 | 8q24.21  | 1q22     |
| LU6_L   | 4  | 8  | 8  | 128,436,711 | 128,469,366 | 8q24.21  | 8q24.21  |
| LU7_L   | 3  | 8  | 8  | 128,440,461 | 7,265,261   | 8q24.21  | 8p23.1   |
| LU12_L  | 9  | 8  | 8  | 128,452,258 | 110,927,832 | 8q24.21  | 8q23.2   |
| LU12_L  | 15 | 8  | 8  | 128,456,563 | 1,426,628   | 8q24.21  | 8p23.3   |

|         |    |    |    |             |             |          |          |
|---------|----|----|----|-------------|-------------|----------|----------|
| LU6_L   | 4  | 8  | 8  | 128,469,366 | 128,436,711 | 8q24.21  | 8q24.21  |
| LU18_L  | 3  | 23 | 23 | 128,477,657 | 128,516,999 | Xq25     | Xq25     |
| LU4_AD  | 3  | 10 | 10 | 128,480,891 | 128,517,933 | 10q26.2  | 10q26.2  |
| LU18_L  | 3  | 23 | 23 | 128,516,999 | 128,477,657 | Xq25     | Xq25     |
| LU4_AD  | 3  | 10 | 10 | 128,517,933 | 128,480,891 | 10q26.2  | 10q26.2  |
| LU12_L  | 26 | 8  | 8  | 128,614,772 | 5,205,741   | 8q24.21  | 8p23.2   |
| LU12_L  | 14 | 8  | 8  | 128,618,949 | 46,977,931  | 8q24.21  | 8q11.1   |
| LU20_AD | 6  | 2  | 6  | 128,795,121 | 4,384,733   | 2q14.3   | 6p25.1   |
| LU7_L   | 5  | 7  | 7  | 129,040,965 | 79,256,868  | 7q32.1   | 7q21.11  |
| LU12_L  | 27 | 8  | 8  | 129,263,976 | 127,081,114 | 8q24.21  | 8q24.13  |
| LU15_AD | 8  | 8  | 8  | 129,450,101 | 129,621,360 | 8q24.21  | 8q24.21  |
| LU6_L   | 11 | 11 | 11 | 129,522,107 | 125,884,738 | 11q24.3  | 11q24.2  |
| LU18_AD | 3  | 8  | 8  | 129,560,066 | 129,590,978 | 8q24.21  | 8q24.21  |
| LU18_AD | 3  | 8  | 8  | 129,590,978 | 129,560,066 | 8q24.21  | 8q24.21  |
| LU4_AD  | 4  | 2  | 4  | 129,611,917 | 150,013,563 | 2q14.3   | 4q31.23  |
| LU15_AD | 8  | 8  | 8  | 129,621,360 | 129,450,101 | 8q24.21  | 8q24.21  |
| LU20_AD | 3  | 8  | 11 | 129,628,942 | 42,144,779  | 8q24.21  | 11p12    |
| LU18_AD | 6  | 5  | 5  | 129,721,267 | 125,625,390 | 5q23.3   | 5q23.2   |
| LU18_AD | 4  | 3  | 2  | 129,743,757 | 159,731,731 | 3q22.1   | 2q24.1   |
| LU16_AD | 3  | 3  | 8  | 129,829,343 | 11,990,438  | 3q22.1   | 8p23.1   |
| LU14_L  | 3  | 5  | 23 | 129,878,635 | 99,823,799  | 5q23.3   | Xq22.1   |
| LU18_AD | 3  | 7  | 1  | 129,956,778 | 9,151,422   | 7q32.2   | 1p36.23  |
| LU3_L   | 4  | 5  | 1  | 129,970,721 | 188,231,192 | 5q23.3   | 1q31.1   |
| LU3_L   | 3  | 4  | 21 | 130,055,821 | 9,864,184   | 4q28.2   | 21p11.2  |
| LU12_L  | 5  | 23 | 23 | 130,291,821 | 130,325,445 | Xq26.1   | Xq26.1   |
| LU12_L  | 5  | 23 | 23 | 130,325,445 | 130,291,821 | Xq26.1   | Xq26.1   |
| LU18_L  | 6  | 9  | 9  | 130,384,599 | 122,191,042 | 9q34.11  | 9q33.1   |
| LU12_AD | 4  | 2  | 2  | 130,501,971 | 182,444,746 | 2q21.1   | 2q31.3   |
| LU7_L   | 4  | 2  | 12 | 130,721,489 | 55,728,400  | 2q21.1   | 12q13.2  |
| LU15_L  | 5  | 10 | 2  | 130,722,642 | 917,156     | 10q26.3  | 2p25.3   |
| LU18_L  | 3  | 23 | 1  | 130,780,420 | 156,713,139 | Xq26.2   | 1q23.1   |
| LU4_AD  | 5  | 6  | 6  | 130,821,501 | 130,861,039 | 6q23.1   | 6q23.1   |
| LU4_AD  | 5  | 6  | 6  | 130,861,039 | 130,821,501 | 6q23.1   | 6q23.1   |
| LU3_L   | 3  | 6  | 6  | 130,886,000 | 130,923,593 | 6q23.1   | 6q23.1   |
| LU3_L   | 3  | 6  | 6  | 130,923,593 | 130,886,000 | 6q23.1   | 6q23.1   |
| LU18_AD | 4  | 5  | 5  | 130,961,887 | 125,678,232 | 5q31.1   | 5q23.2   |
| LU18_L  | 13 | 5  | 5  | 130,962,080 | 125,677,439 | 5q31.1   | 5q23.2   |
| LU18_L  | 4  | 9  | 15 | 131,013,132 | 76,030,292  | 9q34.11  | 15q24.2  |
| LU4_AD  | 5  | 9  | 15 | 131,013,375 | 76,030,078  | 9q34.11  | 15q24.2  |
| LU3_L   | 3  | 12 | 12 | 131,152,820 | 131,189,409 | 12q24.33 | 12q24.33 |
| LU3_L   | 3  | 12 | 12 | 131,189,409 | 131,152,820 | 12q24.33 | 12q24.33 |
| LU6_AD  | 4  | 8  | 8  | 131,298,745 | 131,335,481 | 8q24.21  | 8q24.21  |
| LU6_AD  | 4  | 8  | 8  | 131,335,481 | 131,298,745 | 8q24.21  | 8q24.21  |
| LU18_L  | 3  | 2  | 7  | 131,392,269 | 39,876,623  | 2q21.1   | 7p14.1   |

|         |    |    |    |             |             |         |          |
|---------|----|----|----|-------------|-------------|---------|----------|
| LU4_L   | 3  | 4  | 9  | 131,399,921 | 125,426,208 | 4q28.3  | 9q33.2   |
| LU21_AD | 3  | 10 | 10 | 131,469,065 | 131,504,822 | 10q26.3 | 10q26.3  |
| LU21_AD | 3  | 10 | 10 | 131,504,822 | 131,469,065 | 10q26.3 | 10q26.3  |
| LU5_L   | 3  | 3  | 3  | 131,557,058 | 131,586,735 | 3q22.1  | 3q22.1   |
| LU12_L  | 16 | 8  | 8  | 131,561,282 | 34,463,372  | 8q24.22 | 8p12     |
| LU5_L   | 3  | 3  | 3  | 131,586,735 | 131,557,058 | 3q22.1  | 3q22.1   |
| LU4_AD  | 3  | 9  | 14 | 131,613,748 | 24,444,717  | 9q34.11 | 14q11.2  |
| LU16_L  | 3  | 6  | 10 | 131,617,404 | 92,565,791  | 6q23.2  | 10q23.31 |
| LU12_AD | 3  | 6  | 4  | 131,658,543 | 127,070,237 | 6q23.2  | 4q28.1   |
| LU4_L   | 5  | 11 | 11 | 131,674,270 | 131,709,743 | 11q25   | 11q25    |
| LU4_L   | 5  | 11 | 11 | 131,709,743 | 131,674,270 | 11q25   | 11q25    |
| LU21_AD | 3  | 8  | 8  | 131,808,248 | 131,850,725 | 8q24.22 | 8q24.22  |
| LU21_AD | 3  | 8  | 8  | 131,850,725 | 131,808,248 | 8q24.22 | 8q24.22  |
| LU5_AD  | 3  | 11 | 11 | 131,998,035 | 132,034,263 | 11q25   | 11q25    |
| LU12_L  | 3  | 3  | 1  | 132,014,992 | 227,873,610 | 3q22.1  | 1q42.13  |
| LU8_L   | 4  | 3  | 1  | 132,015,159 | 227,869,968 | 3q22.1  | 1q42.13  |
| LU20_L  | 3  | 6  | 7  | 132,030,860 | 143,476,484 | 6q23.2  | 7q35     |
| LU5_AD  | 3  | 11 | 11 | 132,034,263 | 131,998,035 | 11q25   | 11q25    |
| LU20_AD | 3  | 7  | 7  | 132,083,758 | 132,133,732 | 7q32.3  | 7q32.3   |
| LU18_L  | 5  | 10 | 5  | 132,089,348 | 1,580,032   | 10q26.3 | 5p15.33  |
| LU12_AD | 3  | 10 | 1  | 132,091,204 | 16,432,667  | 10q26.3 | 1p36.13  |
| LU4_AD  | 3  | 10 | 1  | 132,094,133 | 178,524,626 | 10q26.3 | 1q25.2   |
| LU5_L   | 4  | 7  | 7  | 132,096,121 | 132,147,835 | 7q32.3  | 7q32.3   |
| LU20_AD | 3  | 7  | 7  | 132,133,732 | 132,083,758 | 7q32.3  | 7q32.3   |
| LU5_L   | 4  | 7  | 7  | 132,147,835 | 132,096,121 | 7q32.3  | 7q32.3   |
| LU3_L   | 3  | 10 | 10 | 132,339,499 | 132,378,303 | 10q26.3 | 10q26.3  |
| LU3_L   | 3  | 10 | 10 | 132,378,303 | 132,339,499 | 10q26.3 | 10q26.3  |
| LU12_AD | 4  | 11 | 6  | 132,528,893 | 64,855,939  | 11q25   | 6q12     |
| LU4_L   | 3  | 3  | 5  | 132,544,990 | 76,885,095  | 3q22.1  | 5q13.3   |
| LU15_L  | 3  | 2  | 9  | 132,556,893 | 70,659,746  | 2q21.2  | 9q21.11  |
| LU4_L   | 3  | 2  | 22 | 132,566,667 | 16,876,725  | 2q21.2  | 22q11.1  |
| LU8_L   | 6  | 2  | 20 | 132,594,074 | 26,073,031  | 2q21.2  | 20p11.1  |
| LU4_L   | 3  | 4  | 9  | 132,635,182 | 41,951,596  | 4q28.3  | 9p12     |
| LU14_AD | 6  | 10 | 1  | 132,662,151 | 154,081,525 | 10q26.3 | 1q21.3   |
| LU21_L  | 3  | 6  | 6  | 132,803,094 | 132,842,694 | 6q23.2  | 6q23.2   |
| LU3_L   | 3  | 2  | 24 | 132,833,612 | 13,340,635  | 2q21.2  | Yq11.1   |
| LU21_L  | 3  | 6  | 6  | 132,842,694 | 132,803,094 | 6q23.2  | 6q23.2   |
| LU18_AD | 3  | 7  | 11 | 132,853,315 | 94,647,693  | 7q33    | 11q21    |
| LU21_AD | 3  | 7  | 5  | 132,855,259 | 82,264,659  | 7q33    | 5q14.2   |
| LU18_L  | 5  | 5  | 4  | 133,013,631 | 92,906,210  | 5q31.1  | 4q22.1   |
| LU18_AD | 7  | 2  | 5  | 133,040,160 | 2,641,089   | 2q21.2  | 5p15.33  |
| LU18_L  | 8  | 2  | 5  | 133,040,171 | 2,640,074   | 2q21.2  | 5p15.33  |
| LU3_AD  | 4  | 10 | 10 | 133,100,903 | 133,132,742 | 10q26.3 | 10q26.3  |
| LU8_L   | 5  | 2  | 2  | 133,109,614 | 91,850,861  | 2q21.2  | 2p11.1   |



|         |    |    |    |             |             |         |         |
|---------|----|----|----|-------------|-------------|---------|---------|
| LU3_AD  | 4  | 10 | 10 | 133,132,742 | 133,100,903 | 10q26.3 | 10q26.3 |
| LU4_L   | 3  | 2  | 2  | 133,179,517 | 133,241,418 | 2q21.2  | 2q21.2  |
| LU8_L   | 3  | 2  | 2  | 133,216,269 | 133,248,346 | 2q21.2  | 2q21.2  |
| LU4_L   | 3  | 2  | 2  | 133,241,418 | 133,179,517 | 2q21.2  | 2q21.2  |
| LU8_L   | 3  | 2  | 2  | 133,248,346 | 133,216,269 | 2q21.2  | 2q21.2  |
| LU12_L  | 19 | 8  | 8  | 133,274,777 | 96,702,977  | 8q24.22 | 8q22.1  |
| LU12_L  | 10 | 8  | 8  | 133,280,200 | 121,067,030 | 8q24.22 | 8q24.12 |
| LU18_AD | 3  | 4  | 1  | 133,734,068 | 32,905,767  | 4q28.3  | 1p35.1  |
| LU18_AD | 5  | 4  | 21 | 133,805,598 | 20,127,946  | 4q28.3  | 21q21.1 |
| LU20_L  | 3  | 8  | 8  | 133,870,465 | 133,905,864 | 8q24.22 | 8q24.22 |
| LU20_L  | 3  | 8  | 8  | 133,905,864 | 133,870,465 | 8q24.22 | 8q24.22 |
| LU4_AD  | 3  | 6  | 6  | 134,096,225 | 134,136,043 | 6q23.2  | 6q23.2  |
| LU4_AD  | 3  | 6  | 6  | 134,136,043 | 134,096,225 | 6q23.2  | 6q23.2  |
| LU6_L   | 5  | 11 | 11 | 134,143,519 | 102,382,500 | 11q25   | 11q22.2 |
| LU6_AD  | 7  | 11 | 11 | 134,144,109 | 102,382,351 | 11q25   | 11q22.2 |
| LU20_AD | 4  | 5  | 5  | 134,344,917 | 121,426,415 | 5q31.1  | 5q23.2  |
| LU21_AD | 3  | 2  | 2  | 134,458,548 | 134,495,090 | 2q21.2  | 2q21.2  |
| LU21_AD | 3  | 2  | 2  | 134,495,090 | 134,458,548 | 2q21.2  | 2q21.2  |
| LU18_L  | 3  | 5  | 5  | 134,512,218 | 134,562,844 | 5q31.1  | 5q31.1  |
| LU18_AD | 3  | 9  | 3  | 134,560,030 | 121,113,082 | 9q34.13 | 3q13.33 |
| LU18_L  | 3  | 5  | 5  | 134,562,844 | 134,512,218 | 5q31.1  | 5q31.1  |
| LU21_AD | 3  | 4  | 4  | 134,613,566 | 134,643,217 | 4q28.3  | 4q28.3  |
| LU21_AD | 3  | 4  | 4  | 134,643,217 | 134,613,566 | 4q28.3  | 4q28.3  |
| LU5_L   | 3  | 9  | 9  | 134,753,279 | 134,784,676 | 9q34.13 | 9q34.13 |
| LU5_L   | 3  | 9  | 9  | 134,784,676 | 134,753,279 | 9q34.13 | 9q34.13 |
| LU12_L  | 12 | 8  | 8  | 134,958,983 | 2,974,570   | 8q24.22 | 8p23.2  |
| LU12_L  | 26 | 8  | 8  | 134,969,144 | 96,697,200  | 8q24.22 | 8q22.1  |
| LU8_L   | 3  | 5  | 1  | 135,073,802 | 225,074,609 | 5q31.1  | 1q42.12 |
| LU20_AD | 4  | 5  | 12 | 135,107,757 | 45,548,544  | 5q31.1  | 12q12   |
| LU20_AD | 3  | 5  | 9  | 135,110,612 | 69,188,715  | 5q31.1  | 9q21.11 |
| LU3_L   | 3  | 5  | 19 | 135,136,036 | 41,967,992  | 5q31.1  | 19q13.2 |
| LU20_AD | 3  | 5  | 16 | 135,140,174 | 18,577,690  | 5q31.1  | 16p12.3 |
| LU6_L   | 5  | 8  | 8  | 135,324,041 | 135,359,182 | 8q24.22 | 8q24.22 |
| LU6_L   | 5  | 8  | 8  | 135,359,182 | 135,324,041 | 8q24.22 | 8q24.22 |
| LU21_AD | 3  | 4  | 4  | 135,422,143 | 135,456,620 | 4q28.3  | 4q28.3  |
| LU21_AD | 3  | 4  | 4  | 135,456,620 | 135,422,143 | 4q28.3  | 4q28.3  |
| LU3_AD  | 4  | 7  | 7  | 135,483,001 | 135,518,020 | 7q33    | 7q33    |
| LU7_L   | 3  | 10 | 1  | 135,506,367 | 802,915     | 10q26.3 | 1p36.33 |
| LU3_AD  | 4  | 7  | 7  | 135,518,020 | 135,483,001 | 7q33    | 7q33    |
| LU14_AD | 4  | 2  | 11 | 135,564,007 | 93,855,994  | 2q21.3  | 11q21   |
| LU4_AD  | 3  | 3  | 3  | 135,660,202 | 135,693,795 | 3q22.2  | 3q22.2  |
| LU4_AD  | 3  | 3  | 3  | 135,693,795 | 135,660,202 | 3q22.2  | 3q22.2  |
| LU14_L  | 3  | 2  | 7  | 135,724,096 | 97,571,023  | 2q21.3  | 7q21.3  |
| LU12_L  | 17 | 8  | 8  | 135,760,690 | 128,242,877 | 8q24.22 | 8q24.21 |

|         |    |    |    |             |             |         |         |
|---------|----|----|----|-------------|-------------|---------|---------|
| LU12_L  | 19 | 8  | 8  | 135,761,750 | 127,083,056 | 8q24.22 | 8q24.13 |
| LU3_AD  | 3  | 5  | 5  | 135,890,755 | 135,924,080 | 5q31.1  | 5q31.1  |
| LU3_AD  | 3  | 5  | 5  | 135,924,080 | 135,890,755 | 5q31.1  | 5q31.1  |
| LU20_AD | 3  | 7  | 7  | 135,948,312 | 30,576,786  | 7q33    | 7p14.3  |
| LU4_AD  | 5  | 23 | 3  | 136,297,640 | 9,370,196   | Xq26.3  | 3p25.3  |
| LU7_AD  | 3  | 9  | 9  | 136,429,867 | 136,461,391 | 9q34.2  | 9q34.2  |
| LU7_AD  | 3  | 9  | 9  | 136,461,391 | 136,429,867 | 9q34.2  | 9q34.2  |
| LU3_AD  | 3  | 5  | 5  | 136,539,310 | 136,570,662 | 5q31.2  | 5q31.2  |
| LU3_AD  | 3  | 5  | 5  | 136,570,662 | 136,539,310 | 5q31.2  | 5q31.2  |
| LU5_AD  | 3  | 7  | 7  | 136,598,538 | 136,633,280 | 7q33    | 7q33    |
| LU5_AD  | 3  | 7  | 7  | 136,633,280 | 136,598,538 | 7q33    | 7q33    |
| LU12_L  | 4  | 7  | 7  | 136,781,413 | 136,817,090 | 7q33    | 7q33    |
| LU12_L  | 4  | 7  | 7  | 136,817,090 | 136,781,413 | 7q33    | 7q33    |
| LU7_AD  | 3  | 7  | 1  | 136,950,790 | 227,869,205 | 7q33    | 1q42.13 |
| LU4_AD  | 3  | 4  | 4  | 137,071,345 | 137,103,950 | 4q28.3  | 4q28.3  |
| LU4_AD  | 3  | 4  | 4  | 137,103,950 | 137,071,345 | 4q28.3  | 4q28.3  |
| LU8_L   | 4  | 4  | 13 | 137,276,507 | 19,255,364  | 4q28.3  | 13q11   |
| LU12_L  | 14 | 8  | 8  | 137,331,701 | 71,074,354  | 8q24.23 | 8q13.3  |
| LU6_AD  | 14 | 8  | 20 | 137,373,527 | 9,511,629   | 8q24.23 | 20p12.2 |
| LU6_L   | 12 | 8  | 20 | 137,374,676 | 9,513,117   | 8q24.23 | 20p12.2 |
| LU11_AD | 3  | 4  | 19 | 137,533,940 | 9,750,067   | 4q28.3  | 19p13.2 |
| LU21_AD | 3  | 3  | 3  | 137,753,470 | 137,787,159 | 3q22.3  | 3q22.3  |
| LU11_L  | 4  | 8  | 8  | 137,784,461 | 140,297,072 | 8q24.23 | 8q24.3  |
| LU21_AD | 3  | 3  | 3  | 137,787,159 | 137,753,470 | 3q22.3  | 3q22.3  |
| LU18_L  | 6  | 5  | 10 | 137,842,275 | 58,482,123  | 5q31.2  | 10q21.1 |
| LU3_AD  | 3  | 2  | 2  | 138,373,219 | 138,405,889 | 2q22.1  | 2q22.1  |
| LU14_AD | 4  | 4  | 6  | 138,402,200 | 123,068,354 | 4q28.3  | 6q22.31 |
| LU3_AD  | 3  | 2  | 2  | 138,405,889 | 138,373,219 | 2q22.1  | 2q22.1  |
| LU12_L  | 3  | 8  | 11 | 138,423,848 | 94,085,245  | 8q24.23 | 11q21   |
| LU14_L  | 4  | 4  | 4  | 138,524,731 | 163,954,618 | 4q28.3  | 4q32.2  |
| LU4_AD  | 3  | 23 | 23 | 138,659,639 | 138,702,124 | Xq27.1  | Xq27.1  |
| LU4_AD  | 3  | 23 | 23 | 138,702,124 | 138,659,639 | Xq27.1  | Xq27.1  |
| LU16_AD | 4  | 8  | 8  | 138,736,755 | 138,771,674 | 8q24.23 | 8q24.23 |
| LU16_AD | 4  | 8  | 8  | 138,771,674 | 138,736,755 | 8q24.23 | 8q24.23 |
| LU4_AD  | 4  | 23 | 23 | 139,445,878 | 139,478,795 | Xq27.1  | Xq27.1  |
| LU4_AD  | 4  | 23 | 23 | 139,478,795 | 139,445,878 | Xq27.1  | Xq27.1  |
| LU5_L   | 3  | 4  | 6  | 139,544,514 | 106,681,866 | 4q31.1  | 6q21    |
| LU12_L  | 27 | 8  | 8  | 139,577,833 | 73,854,020  | 8q24.23 | 8q13.3  |
| LU14_L  | 6  | 5  | 5  | 139,661,692 | 113,776,564 | 5q31.3  | 5q22.3  |
| LU14_AD | 3  | 5  | 5  | 139,663,074 | 113,780,255 | 5q31.3  | 5q22.3  |
| LU4_L   | 3  | 4  | 4  | 139,738,045 | 139,767,950 | 4q31.1  | 4q31.1  |
| LU4_L   | 3  | 4  | 4  | 139,767,950 | 139,738,045 | 4q31.1  | 4q31.1  |
| LU11_L  | 7  | 8  | 1  | 139,867,133 | 158,763,345 | 8q24.23 | 1q23.1  |
| LU18_L  | 4  | 4  | 9  | 139,979,643 | 90,429,012  | 4q31.1  | 9q22.1  |

|         |   |    |    |             |             |         |          |
|---------|---|----|----|-------------|-------------|---------|----------|
| LU7_L   | 4 | 7  | 7  | 139,988,552 | 19,177,972  | 7q34    | 7p21.1   |
| LU12_L  | 4 | 3  | 3  | 140,059,698 | 140,094,159 | 3q23    | 3q23     |
| LU12_L  | 4 | 3  | 3  | 140,094,159 | 140,059,698 | 3q23    | 3q23     |
| LU11_L  | 7 | 8  | 8  | 140,117,413 | 58,956,326  | 8q24.3  | 8q12.1   |
| LU3_L   | 3 | 6  | 6  | 140,133,610 | 140,182,128 | 6q24.1  | 6q24.1   |
| LU3_L   | 3 | 6  | 6  | 140,182,128 | 140,133,610 | 6q24.1  | 6q24.1   |
| LU11_L  | 4 | 8  | 8  | 140,297,072 | 137,784,461 | 8q24.3  | 8q24.23  |
| LU4_AD  | 6 | 9  | 10 | 140,399,599 | 38,220,139  | 9q34.3  | 10p11.1  |
| LU11_L  | 4 | 8  | 8  | 140,480,647 | 18,986,672  | 8q24.3  | 8p22     |
| LU18_AD | 3 | 4  | 1  | 140,559,968 | 181,218,768 | 4q31.1  | 1q25.3   |
| LU4_AD  | 3 | 9  | 9  | 140,753,412 | 140,787,685 | 9q34.3  | 9q34.3   |
| LU4_AD  | 3 | 9  | 9  | 140,787,685 | 140,753,412 | 9q34.3  | 9q34.3   |
| LU3_AD  | 4 | 6  | 6  | 140,834,573 | 140,866,381 | 6q24.1  | 6q24.1   |
| LU3_AD  | 4 | 6  | 6  | 140,866,381 | 140,834,573 | 6q24.1  | 6q24.1   |
| LU15_L  | 3 | 9  | 9  | 140,924,804 | 140,974,717 | 9q34.3  | 9q34.3   |
| LU15_L  | 3 | 9  | 9  | 140,974,717 | 140,924,804 | 9q34.3  | 9q34.3   |
| LU21_AD | 3 | 6  | 17 | 141,013,022 | 34,545,738  | 6q24.1  | 17q12    |
| LU8_L   | 3 | 8  | 8  | 141,049,448 | 141,079,637 | 8q24.3  | 8q24.3   |
| LU20_AD | 3 | 9  | 24 | 141,077,124 | 19,623,054  | 9q34.3  | Yq11.221 |
| LU8_L   | 3 | 8  | 8  | 141,079,637 | 141,049,448 | 8q24.3  | 8q24.3   |
| LU18_L  | 4 | 2  | 5  | 141,182,353 | 160,669,014 | 2q22.1  | 5q34     |
| LU18_L  | 3 | 7  | 11 | 141,450,767 | 101,569,208 | 7q34    | 11q22.1  |
| LU3_L   | 3 | 7  | 7  | 141,670,575 | 141,709,052 | 7q34    | 7q34     |
| LU3_L   | 3 | 7  | 7  | 141,709,052 | 141,670,575 | 7q34    | 7q34     |
| LU16_L  | 3 | 8  | 8  | 141,751,699 | 141,956,599 | 8q24.3  | 8q24.3   |
| LU5_AD  | 3 | 4  | 4  | 141,760,365 | 141,798,312 | 4q31.21 | 4q31.21  |
| LU3_AD  | 3 | 8  | 8  | 141,768,040 | 141,817,586 | 8q24.3  | 8q24.3   |
| LU5_AD  | 3 | 4  | 4  | 141,798,312 | 141,760,365 | 4q31.21 | 4q31.21  |
| LU3_AD  | 3 | 8  | 8  | 141,817,586 | 141,768,040 | 8q24.3  | 8q24.3   |
| LU4_L   | 3 | 2  | 2  | 141,872,289 | 141,936,924 | 2q22.1  | 2q22.1   |
| LU3_L   | 3 | 2  | 2  | 141,908,032 | 141,940,234 | 2q22.1  | 2q22.1   |
| LU4_L   | 3 | 2  | 2  | 141,936,924 | 141,872,289 | 2q22.1  | 2q22.1   |
| LU3_L   | 3 | 2  | 2  | 141,940,234 | 141,908,032 | 2q22.1  | 2q22.1   |
| LU16_L  | 3 | 8  | 8  | 141,956,599 | 141,751,699 | 8q24.3  | 8q24.3   |
| LU7_AD  | 3 | 8  | 8  | 142,009,457 | 142,042,608 | 8q24.3  | 8q24.3   |
| LU7_AD  | 3 | 8  | 8  | 142,042,608 | 142,009,457 | 8q24.3  | 8q24.3   |
| LU4_AD  | 3 | 3  | 3  | 142,079,725 | 142,110,627 | 3q23    | 3q23     |
| LU4_AD  | 3 | 3  | 3  | 142,110,627 | 142,079,725 | 3q23    | 3q23     |
| LU8_AD  | 3 | 23 | 23 | 142,116,472 | 142,800,686 | Xq27.3  | Xq27.3   |
| LU8_L   | 3 | 7  | 7  | 142,175,284 | 142,274,061 | 7q34    | 7q34     |
| LU4_AD  | 3 | 5  | 5  | 142,228,807 | 142,262,009 | 5q31.3  | 5q31.3   |
| LU4_AD  | 3 | 5  | 5  | 142,262,009 | 142,228,807 | 5q31.3  | 5q31.3   |
| LU8_L   | 3 | 7  | 7  | 142,274,061 | 142,175,284 | 7q34    | 7q34     |
| LU12_L  | 3 | 23 | 23 | 142,326,533 | 142,356,363 | Xq27.3  | Xq27.3   |

|         |    |    |    |             |             |        |          |
|---------|----|----|----|-------------|-------------|--------|----------|
| LU12_L  | 3  | 23 | 23 | 142,356,363 | 142,326,533 | Xq27.3 | Xq27.3   |
| LU3_L   | 3  | 6  | 6  | 142,420,379 | 142,466,932 | 6q24.1 | 6q24.1   |
| LU8_L   | 4  | 23 | 23 | 142,463,436 | 142,501,919 | Xq27.3 | Xq27.3   |
| LU3_L   | 3  | 6  | 6  | 142,466,932 | 142,420,379 | 6q24.1 | 6q24.1   |
| LU8_L   | 4  | 23 | 23 | 142,501,919 | 142,463,436 | Xq27.3 | Xq27.3   |
| LU18_L  | 8  | 8  | 4  | 142,548,699 | 38,245,177  | 8q24.3 | 4p14     |
| LU12_L  | 5  | 1  | 16 | 142,550,227 | 47,917,269  | 1q12   | 16q12.1  |
| LU15_L  | 5  | 1  | 14 | 142,594,981 | 103,701,174 | 1q12   | 14q32.32 |
| LU12_L  | 3  | 1  | 12 | 142,597,059 | 50,889,449  | 1q12   | 12q13.12 |
| LU16_AD | 9  | 1  | 5  | 142,667,341 | 1,753,356   | 1q21.1 | 5p15.33  |
| LU8_AD  | 3  | 1  | 1  | 142,699,221 | 143,230,681 | 1q21.1 | 1q21.1   |
| LU18_L  | 5  | 1  | 5  | 142,701,075 | 1,206,339   | 1q21.1 | 5p15.33  |
| LU8_AD  | 3  | 23 | 23 | 142,800,686 | 142,116,472 | Xq27.3 | Xq27.3   |
| LU4_L   | 21 | 7  | 7  | 142,821,017 | 142,893,979 | 7q34   | 7q34     |
| LU4_AD  | 26 | 7  | 7  | 142,821,221 | 142,894,503 | 7q34   | 7q34     |
| LU18_L  | 15 | 1  | 5  | 142,837,623 | 1,206,607   | 1q21.1 | 5p15.33  |
| LU18_AD | 20 | 1  | 5  | 142,838,166 | 1,206,232   | 1q21.1 | 5p15.33  |
| LU18_L  | 78 | 1  | 5  | 142,838,272 | 4,898,055   | 1q21.1 | 5p15.32  |
| LU18_AD | 67 | 1  | 5  | 142,839,597 | 4,896,130   | 1q21.1 | 5p15.32  |
| LU4_L   | 21 | 7  | 7  | 142,893,979 | 142,821,017 | 7q34   | 7q34     |
| LU4_AD  | 26 | 7  | 7  | 142,894,503 | 142,821,221 | 7q34   | 7q34     |
| LU12_L  | 35 | 8  | 8  | 142,930,740 | 107,502,778 | 8q24.3 | 8q23.1   |
| LU14_AD | 7  | 1  | 10 | 143,161,423 | 42,378,813  | 1q21.1 | 10q11.21 |
| LU14_L  | 5  | 1  | 10 | 143,162,686 | 42,369,435  | 1q21.1 | 10q11.21 |
| LU5_L   | 3  | 1  | 9  | 143,223,284 | 67,288,985  | 1q21.1 | 9q13     |
| LU8_AD  | 3  | 1  | 1  | 143,230,681 | 142,699,221 | 1q21.1 | 1q21.1   |
| LU18_L  | 3  | 1  | 12 | 143,279,005 | 68,862,921  | 1q21.1 | 12q15    |
| LU18_AD | 22 | 1  | 5  | 143,283,169 | 2,640,272   | 1q21.1 | 5p15.33  |
| LU18_L  | 17 | 1  | 5  | 143,283,183 | 2,640,302   | 1q21.1 | 5p15.33  |
| LU18_AD | 12 | 1  | 5  | 143,389,562 | 1,206,184   | 1q21.1 | 5p15.33  |
| LU18_L  | 9  | 1  | 5  | 143,389,674 | 1,206,187   | 1q21.1 | 5p15.33  |
| LU18_L  | 9  | 1  | 5  | 143,390,092 | 4,899,368   | 1q21.1 | 5p15.32  |
| LU18_AD | 7  | 1  | 5  | 143,390,096 | 4,896,700   | 1q21.1 | 5p15.32  |
| LU20_L  | 3  | 7  | 7  | 143,443,455 | 143,548,366 | 7q35   | 7q35     |
| LU3_L   | 3  | 5  | 5  | 143,462,353 | 143,492,277 | 5q31.3 | 5q31.3   |
| LU20_L  | 3  | 7  | 6  | 143,476,484 | 132,030,860 | 7q35   | 6q23.2   |
| LU21_L  | 3  | 1  | 12 | 143,489,883 | 47,840,051  | 1q21.1 | 12q13.11 |
| LU3_L   | 3  | 5  | 5  | 143,492,277 | 143,462,353 | 5q31.3 | 5q31.3   |
| LU20_L  | 3  | 7  | 7  | 143,548,366 | 143,443,455 | 7q35   | 7q35     |
| LU12_L  | 3  | 1  | 1  | 143,717,107 | 17,063,582  | 1q21.1 | 1p36.13  |
| LU14_AD | 6  | 1  | 10 | 143,737,381 | 42,358,772  | 1q21.1 | 10q11.21 |
| LU4_AD  | 3  | 1  | 1  | 143,752,905 | 148,623,862 | 1q21.1 | 1q21.2   |
| LU18_AD | 3  | 1  | 1  | 143,756,329 | 148,614,867 | 1q21.1 | 1q21.2   |
| LU3_L   | 3  | 1  | 1  | 143,762,767 | 149,008,098 | 1q21.1 | 1q21.2   |

|         |    |    |    |             |             |         |          |
|---------|----|----|----|-------------|-------------|---------|----------|
| LU4_L   | 4  | 7  | 1  | 144,117,779 | 169,635,010 | 7q35    | 1q24.2   |
| LU7_L   | 3  | 7  | 11 | 144,119,856 | 67,384,857  | 7q35    | 11q13.2  |
| LU3_AD  | 3  | 1  | 1  | 144,146,499 | 151,990,977 | 1q21.1  | 1q21.3   |
| LU18_AD | 3  | 1  | 1  | 144,182,345 | 146,038,815 | 1q21.1  | 1q21.1   |
| LU4_L   | 3  | 23 | 23 | 144,202,429 | 144,233,092 | Xq27.3  | Xq27.3   |
| LU7_AD  | 4  | 7  | 7  | 144,209,843 | 40,160,397  | 7q35    | 7p14.1   |
| LU4_L   | 3  | 23 | 23 | 144,233,092 | 144,202,429 | Xq27.3  | Xq27.3   |
| LU3_AD  | 4  | 3  | 3  | 144,302,879 | 144,341,264 | 3q24    | 3q24     |
| LU12_L  | 3  | 1  | 1  | 144,324,911 | 147,916,358 | 1q21.1  | 1q21.2   |
| LU3_AD  | 4  | 3  | 3  | 144,341,264 | 144,302,879 | 3q24    | 3q24     |
| LU20_AD | 3  | 8  | 14 | 144,342,705 | 39,305,578  | 8q24.3  | 14q21.1  |
| LU14_L  | 4  | 1  | 13 | 144,378,539 | 20,629,539  | 1q21.1  | 13q12.11 |
| LU15_L  | 3  | 8  | 9  | 144,398,966 | 91,868,684  | 8q24.3  | 9q22.2   |
| LU21_L  | 4  | 6  | 2  | 144,439,461 | 17,525,019  | 6q24.2  | 2p24.2   |
| LU14_AD | 12 | 1  | 1  | 144,578,651 | 153,229,909 | 1q21.1  | 1q21.3   |
| LU14_L  | 4  | 1  | 1  | 144,583,341 | 153,229,847 | 1q21.1  | 1q21.3   |
| LU12_L  | 4  | 1  | 1  | 144,592,228 | 145,974,727 | 1q21.1  | 1q21.1   |
| LU12_L  | 4  | 1  | 1  | 144,617,852 | 148,024,821 | 1q21.1  | 1q21.2   |
| LU14_AD | 43 | 1  | 5  | 144,689,265 | 4,522,098   | 1q21.1  | 5p15.32  |
| LU14_L  | 31 | 1  | 5  | 144,689,520 | 4,523,015   | 1q21.1  | 5p15.32  |
| LU14_AD | 51 | 1  | 1  | 144,689,928 | 145,269,450 | 1q21.1  | 1q21.1   |
| LU14_L  | 26 | 1  | 1  | 144,690,091 | 145,269,418 | 1q21.1  | 1q21.1   |
| LU14_AD | 3  | 1  | 25 | 144,691,160 | 2,494,649   | 1q21.1  | 25       |
| LU20_L  | 5  | 4  | 4  | 144,807,608 | 145,089,983 | 4q31.21 | 4q31.21  |
| LU20_L  | 4  | 4  | 4  | 144,807,712 | 145,088,314 | 4q31.21 | 4q31.21  |
| LU20_AD | 6  | 4  | 4  | 144,812,029 | 145,082,302 | 4q31.21 | 4q31.21  |
| LU14_AD | 7  | 1  | 5  | 144,825,492 | 4,537,275   | 1q21.1  | 5p15.32  |
| LU5_L   | 3  | 3  | 3  | 144,881,739 | 144,921,884 | 3q24    | 3q24     |
| LU14_AD | 3  | 1  | 25 | 144,920,685 | 1,900,119   | 1q21.1  | 25       |
| LU14_L  | 26 | 1  | 1  | 144,921,859 | 155,064,580 | 1q21.1  | 1q22     |
| LU5_L   | 3  | 3  | 3  | 144,921,884 | 144,881,739 | 3q24    | 3q24     |
| LU14_AD | 48 | 1  | 1  | 144,923,413 | 155,061,700 | 1q21.1  | 1q22     |
| LU20_L  | 3  | 4  | 4  | 144,925,734 | 145,089,699 | 4q31.21 | 4q31.21  |
| LU14_L  | 7  | 1  | 1  | 144,964,908 | 145,269,221 | 1q21.1  | 1q21.1   |
| LU14_L  | 11 | 1  | 5  | 144,964,958 | 4,522,777   | 1q21.1  | 5p15.32  |
| LU14_AD | 24 | 1  | 5  | 144,965,042 | 4,521,840   | 1q21.1  | 5p15.32  |
| LU14_AD | 5  | 1  | 18 | 144,966,629 | 107,045     | 1q21.1  | 18p11.32 |
| LU14_AD | 7  | 1  | 1  | 144,966,631 | 145,269,191 | 1q21.1  | 1q21.1   |
| LU3_L   | 3  | 1  | 1  | 145,015,546 | 145,046,002 | 1q21.1  | 1q21.1   |
| LU15_L  | 3  | 6  | 3  | 145,015,880 | 48,252,194  | 6q24.2  | 3p21.31  |
| LU3_AD  | 3  | 3  | 3  | 145,028,186 | 145,065,135 | 3q24    | 3q24     |
| LU3_L   | 3  | 1  | 1  | 145,046,002 | 145,015,546 | 1q21.1  | 1q21.1   |
| LU14_L  | 32 | 1  | 5  | 145,062,086 | 4,532,365   | 1q21.1  | 5p15.32  |
| LU14_AD | 16 | 1  | 5  | 145,062,116 | 4,532,761   | 1q21.1  | 5p15.32  |

|         |    |    |    |             |             |         |         |
|---------|----|----|----|-------------|-------------|---------|---------|
| LU3_AD  | 3  | 3  | 3  | 145,065,135 | 145,028,186 | 3q24    | 3q24    |
| LU14_AD | 24 | 1  | 5  | 145,065,327 | 4,532,766   | 1q21.1  | 5p15.32 |
| LU20_AD | 6  | 4  | 4  | 145,082,302 | 144,812,029 | 4q31.21 | 4q31.21 |
| LU14_AD | 28 | 1  | 5  | 145,086,879 | 5,205,543   | 1q21.1  | 5p15.32 |
| LU14_L  | 26 | 1  | 5  | 145,087,089 | 5,204,523   | 1q21.1  | 5p15.32 |
| LU20_L  | 4  | 4  | 4  | 145,088,314 | 144,807,712 | 4q31.21 | 4q31.21 |
| LU20_L  | 3  | 4  | 4  | 145,089,699 | 144,925,734 | 4q31.21 | 4q31.21 |
| LU20_L  | 5  | 4  | 4  | 145,089,983 | 144,807,608 | 4q31.21 | 4q31.21 |
| LU7_L   | 4  | 7  | 7  | 145,136,762 | 2,757,643   | 7q35    | 7p22.3  |
| LU14_AD | 17 | 1  | 5  | 145,143,543 | 5,171,365   | 1q21.1  | 5p15.32 |
| LU14_AD | 4  | 1  | 1  | 145,173,600 | 153,568,227 | 1q21.1  | 1q21.3  |
| LU12_AD | 3  | 1  | 1  | 145,211,529 | 145,243,210 | 1q21.1  | 1q21.1  |
| LU12_AD | 3  | 1  | 1  | 145,243,210 | 145,211,529 | 1q21.1  | 1q21.1  |
| LU14_AD | 7  | 1  | 1  | 145,269,191 | 144,966,631 | 1q21.1  | 1q21.1  |
| LU14_L  | 7  | 1  | 1  | 145,269,221 | 144,964,908 | 1q21.1  | 1q21.1  |
| LU14_L  | 26 | 1  | 1  | 145,269,418 | 144,690,091 | 1q21.1  | 1q21.1  |
| LU14_AD | 51 | 1  | 1  | 145,269,450 | 144,689,928 | 1q21.1  | 1q21.1  |
| LU3_AD  | 3  | 4  | 4  | 145,516,670 | 145,552,453 | 4q31.21 | 4q31.21 |
| LU3_AD  | 3  | 4  | 4  | 145,552,453 | 145,516,670 | 4q31.21 | 4q31.21 |
| LU5_L   | 4  | 6  | 6  | 145,889,956 | 122,917,133 | 6q24.3  | 6q22.31 |
| LU12_L  | 4  | 1  | 1  | 145,974,727 | 144,592,228 | 1q21.1  | 1q21.1  |
| LU18_AD | 3  | 1  | 1  | 146,038,815 | 144,182,345 | 1q21.1  | 1q21.1  |
| LU20_AD | 3  | 1  | 1  | 146,051,333 | 108,919,674 | 1q21.1  | 1p13.3  |
| LU3_L   | 3  | 1  | 1  | 146,076,350 | 147,729,349 | 1q21.1  | 1q21.2  |
| LU3_L   | 4  | 3  | 6  | 146,127,945 | 87,184,203  | 3q24    | 6q14.3  |
| LU3_L   | 3  | 5  | 5  | 146,170,963 | 146,203,779 | 5q32    | 5q32    |
| LU18_AD | 3  | 8  | 6  | 146,184,261 | 12,668,476  | 8q24.3  | 6p24.1  |
| LU3_L   | 3  | 5  | 5  | 146,203,779 | 146,170,963 | 5q32    | 5q32    |
| LU3_L   | 3  | 8  | 6  | 146,246,609 | 57,625,688  | 8q24.3  | 6p11.2  |
| LU21_L  | 5  | 8  | 6  | 146,249,883 | 57,626,636  | 8q24.3  | 6p11.2  |
| LU3_AD  | 4  | 1  | 1  | 146,546,286 | 149,152,620 | 1q21.1  | 1q21.2  |
| LU15_L  | 3  | 1  | 1  | 146,548,490 | 149,149,317 | 1q21.1  | 1q21.2  |
| LU12_AD | 3  | 1  | 1  | 146,590,827 | 151,994,348 | 1q21.1  | 1q21.3  |
| LU18_L  | 3  | 5  | 19 | 146,609,849 | 41,971,354  | 5q32    | 19q13.2 |
| LU3_L   | 5  | 5  | 19 | 146,611,801 | 41,970,292  | 5q32    | 19q13.2 |
| LU18_L  | 3  | 5  | 4  | 146,612,340 | 22,587,917  | 5q32    | 4p15.2  |
| LU7_L   | 4  | 2  | 5  | 146,709,807 | 30,950,577  | 2q22.3  | 5p13.3  |
| LU18_L  | 4  | 7  | 12 | 146,789,281 | 69,089,192  | 7q35    | 12q15   |
| LU18_AD | 5  | 7  | 12 | 146,789,613 | 69,089,240  | 7q35    | 12q15   |
| LU18_L  | 4  | 7  | 5  | 146,849,957 | 1,399,292   | 7q35    | 5p15.33 |
| LU20_AD | 3  | 1  | 1  | 147,161,105 | 147,194,960 | 1q21.2  | 1q21.2  |
| LU20_AD | 3  | 1  | 1  | 147,194,960 | 147,161,105 | 1q21.2  | 1q21.2  |
| LU12_L  | 3  | 23 | 1  | 147,279,881 | 154,246,993 | Xq28    | 1q21.3  |
| LU18_L  | 3  | 2  | 1  | 147,303,848 | 204,205,213 | 2q22.3  | 1q32.1  |

|         |    |    |    |             |             |         |         |
|---------|----|----|----|-------------|-------------|---------|---------|
| LU4_AD  | 3  | 6  | 6  | 147,403,060 | 147,440,742 | 6q24.3  | 6q24.3  |
| LU4_AD  | 3  | 6  | 6  | 147,440,742 | 147,403,060 | 6q24.3  | 6q24.3  |
| LU18_L  | 5  | 7  | 12 | 147,453,538 | 65,161,844  | 7q35    | 12q14.3 |
| LU3_L   | 3  | 23 | 23 | 147,480,878 | 147,515,625 | Xq28    | Xq28    |
| LU3_L   | 3  | 23 | 23 | 147,515,625 | 147,480,878 | Xq28    | Xq28    |
| LU4_AD  | 3  | 5  | 5  | 147,588,971 | 147,622,278 | 5q32    | 5q32    |
| LU4_AD  | 3  | 5  | 5  | 147,622,278 | 147,588,971 | 5q32    | 5q32    |
| LU20_L  | 3  | 5  | 5  | 147,661,485 | 147,696,437 | 5q32    | 5q32    |
| LU20_L  | 3  | 5  | 5  | 147,696,437 | 147,661,485 | 5q32    | 5q32    |
| LU4_AD  | 3  | 1  | 1  | 147,709,838 | 108,766,561 | 1q21.2  | 1p13.3  |
| LU3_L   | 3  | 1  | 1  | 147,729,349 | 146,076,350 | 1q21.2  | 1q21.1  |
| LU5_L   | 5  | 1  | 4  | 147,797,079 | 22,604,646  | 1q21.2  | 4p15.2  |
| LU12_L  | 4  | 1  | 1  | 147,852,382 | 16,830,283  | 1q21.2  | 1p36.13 |
| LU12_L  | 3  | 1  | 1  | 147,916,358 | 144,324,911 | 1q21.2  | 1q21.1  |
| LU4_AD  | 3  | 7  | 2  | 148,011,197 | 57,457,309  | 7q36.1  | 2p16.1  |
| LU12_L  | 4  | 1  | 1  | 148,024,821 | 144,617,852 | 1q21.2  | 1q21.1  |
| LU11_AD | 13 | 5  | 5  | 148,028,463 | 148,072,067 | 5q32    | 5q32    |
| LU4_L   | 3  | 2  | 6  | 148,070,707 | 72,497,126  | 2q22.3  | 6q13    |
| LU11_AD | 13 | 5  | 5  | 148,072,067 | 148,028,463 | 5q32    | 5q32    |
| LU18_L  | 3  | 5  | 5  | 148,081,597 | 148,118,331 | 5q32    | 5q32    |
| LU18_L  | 3  | 5  | 5  | 148,118,331 | 148,081,597 | 5q32    | 5q32    |
| LU18_L  | 3  | 3  | 12 | 148,136,958 | 68,162,799  | 3q24    | 12q15   |
| LU21_AD | 3  | 5  | 5  | 148,145,482 | 148,178,806 | 5q32    | 5q32    |
| LU21_AD | 3  | 5  | 5  | 148,178,806 | 148,145,482 | 5q32    | 5q32    |
| LU12_L  | 3  | 1  | 1  | 148,247,649 | 149,230,904 | 1q21.2  | 1q21.2  |
| LU18_L  | 4  | 5  | 5  | 148,415,099 | 148,494,346 | 5q32    | 5q32    |
| LU18_L  | 4  | 5  | 5  | 148,494,346 | 148,415,099 | 5q32    | 5q32    |
| LU18_AD | 3  | 1  | 1  | 148,614,867 | 143,756,329 | 1q21.2  | 1q21.1  |
| LU4_AD  | 3  | 1  | 1  | 148,623,862 | 143,752,905 | 1q21.2  | 1q21.1  |
| LU8_L   | 3  | 3  | 3  | 148,630,619 | 148,662,430 | 3q24    | 3q24    |
| LU14_L  | 4  | 1  | 12 | 148,631,954 | 43,180,840  | 1q21.2  | 12q12   |
| LU8_L   | 3  | 3  | 3  | 148,662,430 | 148,630,619 | 3q24    | 3q24    |
| LU16_AD | 3  | 23 | 23 | 148,666,422 | 149,012,890 | Xq28    | Xq28    |
| LU21_L  | 18 | 5  | 5  | 148,767,516 | 75,281,816  | 5q32    | 5q13.3  |
| LU21_AD | 21 | 5  | 5  | 148,767,750 | 75,282,221  | 5q32    | 5q13.3  |
| LU18_AD | 18 | 2  | 2  | 148,808,684 | 148,863,647 | 2q23.1  | 2q23.1  |
| LU18_L  | 16 | 2  | 2  | 148,811,260 | 148,862,568 | 2q23.1  | 2q23.1  |
| LU18_L  | 3  | 3  | 3  | 148,833,912 | 148,870,492 | 3q24    | 3q24    |
| LU21_AD | 3  | 1  | 10 | 148,846,826 | 39,038,067  | 1q21.2  | 10p11.1 |
| LU18_L  | 16 | 2  | 2  | 148,862,568 | 148,811,260 | 2q23.1  | 2q23.1  |
| LU18_AD | 18 | 2  | 2  | 148,863,647 | 148,808,684 | 2q23.1  | 2q23.1  |
| LU18_L  | 3  | 3  | 3  | 148,870,492 | 148,833,912 | 3q24    | 3q24    |
| LU16_AD | 4  | 23 | 9  | 148,904,012 | 88,981,902  | Xq28    | 9q21.33 |
| LU3_L   | 5  | 4  | 4  | 148,919,074 | 148,960,504 | 4q31.23 | 4q31.23 |

|         |   |    |    |             |             |         |          |
|---------|---|----|----|-------------|-------------|---------|----------|
| LU4_AD  | 3 | 23 | 20 | 148,957,855 | 773,607     | Xq28    | 20p13    |
| LU11_AD | 4 | 23 | 8  | 148,957,987 | 66,043,918  | Xq28    | 8q13.1   |
| LU4_L   | 3 | 23 | 23 | 148,958,930 | 44,864,676  | Xq28    | Xp11.3   |
| LU3_L   | 5 | 4  | 4  | 148,960,504 | 148,919,074 | 4q31.23 | 4q31.23  |
| LU8_AD  | 3 | 1  | 7  | 149,004,772 | 64,606,128  | 1q21.2  | 7q11.21  |
| LU3_L   | 3 | 1  | 1  | 149,008,098 | 143,762,767 | 1q21.2  | 1q21.1   |
| LU16_AD | 3 | 23 | 23 | 149,012,890 | 148,666,422 | Xq28    | Xq28     |
| LU18_AD | 4 | 2  | 21 | 149,014,357 | 29,767,683  | 2q23.1  | 21q21.3  |
| LU16_L  | 5 | 5  | 23 | 149,032,463 | 67,872,846  | 5q32    | Xq13.1   |
| LU15_L  | 3 | 1  | 1  | 149,149,317 | 146,548,490 | 1q21.2  | 1q21.1   |
| LU3_AD  | 4 | 1  | 1  | 149,152,620 | 146,546,286 | 1q21.2  | 1q21.1   |
| LU4_AD  | 3 | 7  | 19 | 149,222,061 | 35,114,754  | 7q36.1  | 19q13.11 |
| LU12_L  | 3 | 1  | 1  | 149,230,904 | 148,247,649 | 1q21.2  | 1q21.2   |
| LU20_AD | 3 | 4  | 5  | 149,260,151 | 39,453,205  | 4q31.23 | 5p13.1   |
| LU5_L   | 5 | 1  | 1  | 149,293,097 | 149,330,782 | 1q21.2  | 1q21.2   |
| LU5_L   | 5 | 1  | 1  | 149,330,782 | 149,293,097 | 1q21.2  | 1q21.2   |
| LU14_L  | 3 | 6  | 6  | 149,420,686 | 149,461,899 | 6q25.1  | 6q25.1   |
| LU14_L  | 3 | 6  | 6  | 149,461,899 | 149,420,686 | 6q25.1  | 6q25.1   |
| LU14_L  | 3 | 1  | 12 | 149,539,327 | 43,182,475  | 1q21.2  | 12q12    |
| LU3_L   | 3 | 2  | 2  | 149,625,205 | 149,665,059 | 2q23.1  | 2q23.1   |
| LU3_L   | 3 | 2  | 2  | 149,665,059 | 149,625,205 | 2q23.1  | 2q23.1   |
| LU5_L   | 5 | 7  | 12 | 149,729,870 | 9,719,610   | 7q36.1  | 12p13.31 |
| LU20_AD | 3 | 2  | 2  | 149,791,021 | 149,835,679 | 2q23.1  | 2q23.1   |
| LU20_AD | 3 | 2  | 2  | 149,835,679 | 149,791,021 | 2q23.1  | 2q23.1   |
| LU4_AD  | 4 | 4  | 2  | 150,013,563 | 129,611,917 | 4q31.23 | 2q14.3   |
| LU8_L   | 3 | 2  | 2  | 150,110,555 | 150,151,441 | 2q23.2  | 2q23.2   |
| LU8_L   | 3 | 2  | 2  | 150,151,441 | 150,110,555 | 2q23.2  | 2q23.2   |
| LU12_L  | 4 | 2  | 10 | 150,156,774 | 59,346,650  | 2q23.2  | 10q21.1  |
| LU21_AD | 3 | 2  | 2  | 150,179,395 | 84,702,441  | 2q23.2  | 2p11.2   |
| LU4_L   | 3 | 2  | 2  | 150,221,643 | 150,251,536 | 2q23.2  | 2q23.2   |
| LU4_L   | 3 | 2  | 2  | 150,251,536 | 150,221,643 | 2q23.2  | 2q23.2   |
| LU20_AD | 3 | 4  | 4  | 150,397,422 | 150,458,603 | 4q31.23 | 4q31.23  |
| LU20_AD | 3 | 4  | 4  | 150,458,603 | 150,397,422 | 4q31.23 | 4q31.23  |
| LU20_AD | 3 | 3  | 12 | 150,574,870 | 8,918,716   | 3q25.1  | 12p13.31 |
| LU4_AD  | 6 | 1  | 1  | 150,605,713 | 201,589,569 | 1q21.3  | 1q32.1   |
| LU4_AD  | 8 | 1  | 1  | 150,608,282 | 229,276,623 | 1q21.3  | 1q42.13  |
| LU4_L   | 4 | 1  | 1  | 150,608,814 | 229,276,034 | 1q21.3  | 1q42.13  |
| LU4_AD  | 7 | 1  | 1  | 150,612,695 | 57,431,323  | 1q21.3  | 1p32.2   |
| LU4_AD  | 8 | 1  | 16 | 150,849,258 | 66,438,484  | 1q21.3  | 16q21    |
| LU12_AD | 3 | 6  | 11 | 151,176,430 | 101,102,628 | 6q25.1  | 11q22.1  |
| LU3_L   | 7 | 4  | 4  | 151,333,029 | 161,418,833 | 4q31.3  | 4q32.1   |
| LU3_L   | 4 | 5  | 1  | 151,400,904 | 207,763,118 | 5q33.1  | 1q32.2   |
| LU20_L  | 3 | 7  | 2  | 151,727,984 | 184,375,123 | 7q36.1  | 2q32.1   |
| LU21_L  | 3 | 7  | 5  | 151,731,969 | 157,307,786 | 7q36.1  | 5q33.3   |



|         |    |    |    |             |             |        |          |
|---------|----|----|----|-------------|-------------|--------|----------|
| LU18_AD | 4  | 7  | 4  | 151,738,954 | 87,385,903  | 7q36.1 | 4q21.3   |
| LU18_L  | 4  | 6  | 9  | 151,763,214 | 77,551,202  | 6q25.1 | 9q21.13  |
| LU3_L   | 3  | 7  | 2  | 151,958,203 | 91,902,929  | 7q36.1 | 2p11.1   |
| LU20_AD | 4  | 1  | 1  | 151,987,827 | 21,792,239  | 1q21.3 | 1p36.12  |
| LU3_AD  | 3  | 1  | 1  | 151,990,977 | 144,146,499 | 1q21.3 | 1q21.1   |
| LU12_AD | 3  | 1  | 1  | 151,994,348 | 146,590,827 | 1q21.3 | 1q21.1   |
| LU4_AD  | 4  | 1  | 10 | 152,054,267 | 31,649,117  | 1q21.3 | 10p11.22 |
| LU16_AD | 4  | 3  | 4  | 152,316,416 | 168,362,328 | 3q25.2 | 4q32.3   |
| LU18_AD | 4  | 23 | 17 | 152,362,886 | 53,549,441  | Xq28   | 17q22    |
| LU6_L   | 4  | 1  | 12 | 152,452,425 | 216,467     | 1q21.3 | 12p13.33 |
| LU4_L   | 3  | 23 | 19 | 152,506,042 | 58,506,514  | Xq28   | 19q13.43 |
| LU4_AD  | 3  | 2  | 2  | 152,771,089 | 152,804,865 | 2q23.3 | 2q23.3   |
| LU4_AD  | 3  | 2  | 2  | 152,804,865 | 152,771,089 | 2q23.3 | 2q23.3   |
| LU20_AD | 3  | 4  | 4  | 152,973,762 | 153,015,398 | 4q31.3 | 4q31.3   |
| LU20_AD | 3  | 4  | 4  | 153,015,398 | 152,973,762 | 4q31.3 | 4q31.3   |
| LU20_AD | 4  | 5  | 5  | 153,041,083 | 153,080,694 | 5q33.2 | 5q33.2   |
| LU4_AD  | 11 | 1  | 10 | 153,052,855 | 38,243,735  | 1q21.3 | 10p11.1  |
| LU4_AD  | 5  | 1  | 1  | 153,072,619 | 207,034,587 | 1q21.3 | 1q32.1   |
| LU4_L   | 5  | 1  | 16 | 153,073,736 | 3,266,841   | 1q21.3 | 16p13.3  |
| LU4_L   | 3  | 1  | 1  | 153,074,023 | 207,034,417 | 1q21.3 | 1q32.1   |
| LU4_AD  | 4  | 1  | 1  | 153,077,291 | 48,696,108  | 1q21.3 | 1p33     |
| LU4_L   | 3  | 1  | 1  | 153,077,404 | 48,695,621  | 1q21.3 | 1p33     |
| LU20_AD | 4  | 5  | 5  | 153,080,694 | 153,041,083 | 5q33.2 | 5q33.2   |
| LU14_AD | 7  | 1  | 1  | 153,227,530 | 153,548,058 | 1q21.3 | 1q21.3   |
| LU14_L  | 4  | 1  | 1  | 153,229,847 | 144,583,341 | 1q21.3 | 1q21.1   |
| LU14_AD | 12 | 1  | 1  | 153,229,909 | 144,578,651 | 1q21.3 | 1q21.1   |
| LU20_AD | 3  | 3  | 3  | 153,321,943 | 153,359,107 | 3q25.2 | 3q25.2   |
| LU20_AD | 3  | 3  | 3  | 153,359,107 | 153,321,943 | 3q25.2 | 3q25.2   |
| LU14_AD | 7  | 1  | 1  | 153,548,058 | 153,227,530 | 1q21.3 | 1q21.3   |
| LU14_L  | 5  | 1  | 5  | 153,559,301 | 24,949,645  | 1q21.3 | 5p14.1   |
| LU14_AD | 12 | 1  | 5  | 153,561,127 | 24,947,242  | 1q21.3 | 5p14.1   |
| LU14_AD | 4  | 1  | 1  | 153,568,227 | 145,173,600 | 1q21.3 | 1q21.1   |
| LU16_L  | 3  | 4  | 4  | 153,947,777 | 153,981,175 | 4q31.3 | 4q31.3   |
| LU20_AD | 3  | 3  | 3  | 153,975,963 | 154,006,977 | 3q25.2 | 3q25.2   |
| LU16_L  | 3  | 4  | 4  | 153,981,175 | 153,947,777 | 4q31.3 | 4q31.3   |
| LU20_AD | 3  | 3  | 3  | 154,006,977 | 153,975,963 | 3q25.2 | 3q25.2   |
| LU14_AD | 6  | 1  | 10 | 154,081,525 | 132,662,151 | 1q21.3 | 10q26.3  |
| LU20_AD | 4  | 3  | 3  | 154,086,558 | 161,569,977 | 3q25.2 | 3q26.1   |
| LU3_AD  | 3  | 23 | 23 | 154,109,698 | 154,611,524 | Xq28   | Xq28     |
| LU21_L  | 4  | 1  | 19 | 154,129,227 | 42,014,912  | 1q21.3 | 19q13.2  |
| LU7_L   | 5  | 1  | 19 | 154,129,260 | 42,013,351  | 1q21.3 | 19q13.2  |
| LU15_L  | 5  | 1  | 19 | 154,129,610 | 42,013,023  | 1q21.3 | 19q13.2  |
| LU20_AD | 5  | 1  | 19 | 154,129,802 | 42,012,842  | 1q21.3 | 19q13.2  |
| LU3_L   | 3  | 1  | 19 | 154,130,076 | 42,016,458  | 1q21.3 | 19q13.2  |

|         |    |    |    |             |             |         |          |
|---------|----|----|----|-------------|-------------|---------|----------|
| LU8_L   | 4  | 1  | 19 | 154,145,341 | 42,016,420  | 1q21.3  | 19q13.2  |
| LU12_L  | 3  | 1  | 23 | 154,246,993 | 147,279,881 | 1q21.3  | Xq28     |
| LU3_L   | 3  | 7  | 7  | 154,268,631 | 154,372,119 | 7q36.2  | 7q36.2   |
| LU3_L   | 3  | 7  | 7  | 154,372,119 | 154,268,631 | 7q36.2  | 7q36.2   |
| LU3_AD  | 3  | 23 | 23 | 154,611,524 | 154,109,698 | Xq28    | Xq28     |
| LU12_AD | 3  | 4  | 6  | 154,983,218 | 40,831,269  | 4q31.3  | 6p21.1   |
| LU16_AD | 3  | 23 | 9  | 155,030,957 | 103,887,727 | Xq28    | 9q31.1   |
| LU15_L  | 3  | 7  | 14 | 155,031,302 | 103,702,302 | 7q36.2  | 14q32.32 |
| LU11_AD | 3  | 7  | 8  | 155,034,056 | 49,875,838  | 7q36.2  | 8q11.21  |
| LU14_AD | 48 | 1  | 1  | 155,061,700 | 144,923,413 | 1q22    | 1q21.1   |
| LU14_L  | 26 | 1  | 1  | 155,064,580 | 144,921,859 | 1q22    | 1q21.1   |
| LU14_L  | 5  | 1  | 1  | 155,105,801 | 174,935,942 | 1q22    | 1q25.1   |
| LU14_AD | 13 | 1  | 1  | 155,107,846 | 174,938,623 | 1q22    | 1q25.1   |
| LU4_AD  | 23 | 5  | 18 | 155,213,706 | 77,817,164  | 5q33.2  | 18q23    |
| LU4_L   | 3  | 5  | 18 | 155,213,943 | 77,816,896  | 5q33.2  | 18q23    |
| LU18_L  | 4  | 1  | 8  | 155,404,106 | 128,426,699 | 1q22    | 8q24.21  |
| LU14_L  | 4  | 1  | 10 | 155,406,759 | 42,383,599  | 1q22    | 10q11.21 |
| LU14_AD | 4  | 1  | 5  | 155,407,281 | 24,952,604  | 1q22    | 5p14.1   |
| LU4_AD  | 5  | 5  | 19 | 155,447,766 | 35,541,456  | 5q33.2  | 19q13.12 |
| LU7_L   | 3  | 1  | 5  | 155,597,884 | 156,083,475 | 1q22    | 5q33.3   |
| LU5_AD  | 3  | 1  | 8  | 155,601,703 | 7,361,164   | 1q22    | 8p23.1   |
| LU3_L   | 3  | 2  | 2  | 155,705,158 | 155,740,767 | 2q24.1  | 2q24.1   |
| LU3_L   | 3  | 2  | 2  | 155,740,767 | 155,705,158 | 2q24.1  | 2q24.1   |
| LU7_L   | 3  | 5  | 1  | 156,083,475 | 155,597,884 | 5q33.3  | 1q22     |
| LU3_L   | 3  | 5  | 22 | 156,095,888 | 18,928,204  | 5q33.3  | 22q11.21 |
| LU3_L   | 3  | 3  | 13 | 156,335,587 | 72,594,774  | 3q25.31 | 13q21.33 |
| LU5_AD  | 3  | 4  | 3  | 156,379,079 | 89,635,972  | 4q32.1  | 3p11.1   |
| LU4_AD  | 3  | 4  | 11 | 156,382,029 | 103,272,244 | 4q32.1  | 11q22.3  |
| LU18_L  | 3  | 4  | 23 | 156,382,568 | 55,205,149  | 4q32.1  | Xp11.21  |
| LU21_L  | 4  | 4  | 3  | 156,386,129 | 40,294,147  | 4q32.1  | 3p22.1   |
| LU3_L   | 3  | 5  | 5  | 156,690,198 | 156,720,826 | 5q33.3  | 5q33.3   |
| LU18_L  | 3  | 1  | 23 | 156,713,139 | 130,780,420 | 1q23.1  | Xq26.2   |
| LU3_L   | 3  | 5  | 5  | 156,720,826 | 156,690,198 | 5q33.3  | 5q33.3   |
| LU15_L  | 3  | 2  | 4  | 156,781,621 | 46,298,054  | 2q24.1  | 4p12     |
| LU3_L   | 3  | 7  | 7  | 156,879,521 | 156,912,311 | 7q36.3  | 7q36.3   |
| LU3_L   | 3  | 7  | 7  | 156,912,311 | 156,879,521 | 7q36.3  | 7q36.3   |
| LU5_L   | 3  | 5  | 5  | 156,960,313 | 156,996,669 | 5q33.3  | 5q33.3   |
| LU5_L   | 3  | 5  | 5  | 156,996,669 | 156,960,313 | 5q33.3  | 5q33.3   |
| LU8_AD  | 4  | 4  | 2  | 157,028,074 | 207,883,627 | 4q32.1  | 2q33.3   |
| LU18_AD | 3  | 3  | 3  | 157,155,249 | 157,191,640 | 3q25.32 | 3q25.32  |
| LU15_L  | 5  | 1  | 1  | 157,171,926 | 157,455,462 | 1q23.1  | 1q23.1   |
| LU18_AD | 3  | 3  | 3  | 157,191,640 | 157,155,249 | 3q25.32 | 3q25.32  |
| LU21_L  | 3  | 5  | 7  | 157,307,786 | 151,731,969 | 5q33.3  | 7q36.1   |
| LU15_L  | 5  | 1  | 1  | 157,455,462 | 157,171,926 | 1q23.1  | 1q23.1   |

|         |    |   |    |             |             |        |          |
|---------|----|---|----|-------------|-------------|--------|----------|
| LU18_AD | 4  | 6 | 12 | 157,720,178 | 63,399,661  | 6q25.3 | 12q14.2  |
| LU18_AD | 3  | 1 | 1  | 157,922,360 | 157,963,137 | 1q23.1 | 1q23.1   |
| LU4_AD  | 17 | 5 | 7  | 157,949,947 | 53,123,687  | 5q33.3 | 7p12.1   |
| LU4_L   | 3  | 5 | 7  | 157,951,517 | 53,125,318  | 5q33.3 | 7p12.1   |
| LU18_AD | 3  | 1 | 1  | 157,963,137 | 157,922,360 | 1q23.1 | 1q23.1   |
| LU4_L   | 5  | 5 | 7  | 158,078,479 | 53,170,242  | 5q33.3 | 7p12.1   |
| LU4_AD  | 7  | 5 | 7  | 158,078,965 | 53,169,418  | 5q33.3 | 7p12.1   |
| LU4_AD  | 14 | 5 | 7  | 158,230,149 | 52,767,890  | 5q33.3 | 7p12.1   |
| LU4_AD  | 3  | 1 | 14 | 158,499,686 | 102,547,351 | 1q23.1 | 14q32.31 |
| LU7_L   | 3  | 1 | 1  | 158,566,571 | 158,596,597 | 1q23.1 | 1q23.1   |
| LU7_L   | 3  | 1 | 1  | 158,596,597 | 158,566,571 | 1q23.1 | 1q23.1   |
| LU11_L  | 7  | 1 | 8  | 158,763,345 | 139,867,133 | 1q23.1 | 8q24.23  |
| LU4_AD  | 3  | 5 | 23 | 158,794,262 | 65,439,977  | 5q33.3 | Xq12     |
| LU7_L   | 3  | 7 | 6  | 159,024,244 | 7,986,993   | 7q36.3 | 6p24.3   |
| LU3_AD  | 3  | 5 | 5  | 159,063,179 | 159,094,075 | 5q33.3 | 5q33.3   |
| LU3_AD  | 3  | 5 | 5  | 159,094,075 | 159,063,179 | 5q33.3 | 5q33.3   |
| LU15_L  | 3  | 1 | 1  | 159,126,866 | 161,189,231 | 1q23.2 | 1q23.3   |
| LU14_AD | 4  | 6 | 8  | 159,682,906 | 68,784,909  | 6q25.3 | 8q13.2   |
| LU4_AD  | 3  | 2 | 25 | 159,703,289 | 1,980,004   | 2q24.1 | 25       |
| LU4_AD  | 3  | 2 | 5  | 159,706,535 | 98,532,634  | 2q24.1 | 5q21.1   |
| LU4_AD  | 3  | 2 | 4  | 159,707,493 | 4,133,528   | 2q24.1 | 4p16.3   |
| LU18_AD | 4  | 2 | 3  | 159,731,731 | 129,743,757 | 2q24.1 | 3q22.1   |
| LU7_AD  | 4  | 2 | 3  | 159,738,817 | 125,413,697 | 2q24.1 | 3q21.2   |
| LU4_AD  | 25 | 5 | 5  | 159,832,131 | 163,910,622 | 5q33.3 | 5q34     |
| LU4_AD  | 46 | 5 | 5  | 159,875,769 | 59,194,839  | 5q33.3 | 5q12.1   |
| LU4_L   | 3  | 5 | 5  | 159,881,337 | 59,195,496  | 5q33.3 | 5q12.1   |
| LU4_AD  | 24 | 5 | 5  | 159,890,411 | 64,622,195  | 5q33.3 | 5q12.3   |
| LU4_AD  | 22 | 5 | 5  | 159,905,418 | 62,793,112  | 5q34   | 5q12.1   |
| LU11_L  | 4  | 1 | 20 | 160,267,970 | 55,858,940  | 1q23.2 | 20q13.31 |
| LU7_AD  | 3  | 1 | 20 | 160,287,187 | 52,491,878  | 1q23.2 | 20q13.2  |
| LU11_L  | 8  | 1 | 20 | 160,299,986 | 55,864,022  | 1q23.2 | 20q13.31 |
| LU18_L  | 3  | 6 | 5  | 160,514,663 | 72,316,433  | 6q25.3 | 5q13.2   |
| LU4_AD  | 3  | 1 | 1  | 160,668,310 | 12,840,988  | 1q23.3 | 1p36.21  |
| LU18_L  | 4  | 5 | 2  | 160,669,014 | 141,182,353 | 5q34   | 2q22.1   |
| LU3_L   | 3  | 1 | 5  | 160,671,144 | 40,107,016  | 1q23.3 | 5p13.1   |
| LU4_AD  | 4  | 5 | 3  | 160,671,933 | 39,624,362  | 5q34   | 3p22.1   |
| LU3_AD  | 3  | 1 | 12 | 160,694,887 | 70,838,624  | 1q23.3 | 12q15    |
| LU3_AD  | 26 | 2 | 2  | 160,755,201 | 160,804,997 | 2q24.2 | 2q24.2   |
| LU3_L   | 20 | 2 | 2  | 160,755,820 | 160,804,563 | 2q24.2 | 2q24.2   |
| LU3_L   | 20 | 2 | 2  | 160,804,563 | 160,755,820 | 2q24.2 | 2q24.2   |
| LU3_AD  | 26 | 2 | 2  | 160,804,997 | 160,755,201 | 2q24.2 | 2q24.2   |
| LU3_AD  | 4  | 6 | 6  | 160,939,874 | 161,350,446 | 6q25.3 | 6q26     |
| LU20_AD | 3  | 6 | 6  | 161,125,608 | 161,198,041 | 6q26   | 6q26     |
| LU4_AD  | 5  | 5 | 5  | 161,151,002 | 161,181,476 | 5q34   | 5q34     |

|         |    |   |    |             |             |        |         |
|---------|----|---|----|-------------|-------------|--------|---------|
| LU4_AD  | 5  | 5 | 5  | 161,181,476 | 161,151,002 | 5q34   | 5q34    |
| LU15_L  | 3  | 1 | 1  | 161,189,231 | 159,126,866 | 1q23.3 | 1q23.2  |
| LU20_AD | 3  | 6 | 6  | 161,198,041 | 161,125,608 | 6q26   | 6q26    |
| LU11_AD | 3  | 6 | 12 | 161,212,810 | 10,518,836  | 6q26   | 12p13.2 |
| LU21_AD | 3  | 1 | 4  | 161,220,671 | 59,327,319  | 1q23.3 | 4q12    |
| LU16_AD | 3  | 1 | 6  | 161,225,913 | 87,386,399  | 1q23.3 | 6q14.3  |
| LU18_L  | 8  | 3 | 12 | 161,232,960 | 71,332,798  | 3q26.1 | 12q15   |
| LU3_AD  | 4  | 6 | 6  | 161,350,446 | 160,939,874 | 6q26   | 6q25.3  |
| LU3_L   | 8  | 4 | 4  | 161,414,641 | 187,122,683 | 4q32.1 | 4q35.2  |
| LU3_L   | 7  | 4 | 4  | 161,418,833 | 151,333,029 | 4q32.1 | 4q31.3  |
| LU3_AD  | 3  | 1 | 7  | 161,444,237 | 91,083,436  | 1q23.3 | 7q21.13 |
| LU4_L   | 4  | 1 | 17 | 161,445,889 | 52,367,675  | 1q23.3 | 17q22   |
| LU20_AD | 4  | 3 | 3  | 161,569,977 | 154,086,558 | 3q26.1 | 3q25.2  |
| LU18_L  | 3  | 3 | 1  | 161,762,754 | 220,894,541 | 3q26.1 | 1q41    |
| LU5_L   | 3  | 3 | 7  | 161,762,775 | 24,833,282  | 3q26.1 | 7p15.3  |
| LU18_L  | 16 | 3 | 12 | 161,763,613 | 68,939,895  | 3q26.1 | 12q15   |
| LU15_AD | 3  | 3 | 6  | 161,766,191 | 47,611,794  | 3q26.1 | 6p12.3  |
| LU3_L   | 5  | 2 | 2  | 161,852,707 | 161,886,254 | 2q24.2 | 2q24.2  |
| LU3_L   | 3  | 3 | 6  | 161,872,892 | 62,314,175  | 3q26.1 | 6q11.1  |
| LU3_L   | 5  | 2 | 2  | 161,886,254 | 161,852,707 | 2q24.2 | 2q24.2  |
| LU20_AD | 5  | 1 | 1  | 162,061,963 | 162,095,530 | 1q23.3 | 1q23.3  |
| LU20_AD | 5  | 1 | 1  | 162,095,530 | 162,061,963 | 1q23.3 | 1q23.3  |
| LU18_AD | 13 | 2 | 5  | 162,138,146 | 2,640,017   | 2q24.2 | 5p15.33 |
| LU18_L  | 23 | 2 | 5  | 162,138,215 | 2,639,919   | 2q24.2 | 5p15.33 |
| LU21_L  | 3  | 1 | 1  | 162,141,560 | 162,183,468 | 1q23.3 | 1q23.3  |
| LU21_L  | 3  | 1 | 1  | 162,183,468 | 162,141,560 | 1q23.3 | 1q23.3  |
| LU21_L  | 4  | 1 | 2  | 162,281,458 | 208,262,333 | 1q23.3 | 2q33.3  |
| LU4_AD  | 3  | 5 | 5  | 162,344,979 | 174,083,536 | 5q34   | 5q35.2  |
| LU6_AD  | 5  | 6 | 6  | 163,125,662 | 35,209,676  | 6q26   | 6p21.31 |
| LU21_AD | 3  | 1 | 1  | 163,234,086 | 163,284,130 | 1q23.3 | 1q23.3  |
| LU21_AD | 3  | 1 | 1  | 163,284,130 | 163,234,086 | 1q23.3 | 1q23.3  |
| LU8_AD  | 3  | 3 | 6  | 163,414,105 | 167,310,126 | 3q26.1 | 6q27    |
| LU3_AD  | 3  | 3 | 10 | 163,520,577 | 110,805,712 | 3q26.1 | 10q25.1 |
| LU18_AD | 3  | 3 | 1  | 163,520,947 | 173,345,272 | 3q26.1 | 1q25.1  |
| LU21_AD | 3  | 4 | 4  | 163,548,370 | 163,580,875 | 4q32.2 | 4q32.2  |
| LU21_AD | 3  | 4 | 4  | 163,580,875 | 163,548,370 | 4q32.2 | 4q32.2  |
| LU4_AD  | 25 | 5 | 5  | 163,910,622 | 159,832,131 | 5q34   | 5q33.3  |
| LU4_L   | 16 | 3 | 3  | 163,930,258 | 163,868,461 | 3q26.1 | 3q26.1  |
| LU4_AD  | 11 | 3 | 3  | 163,931,476 | 163,869,007 | 3q26.1 | 3q26.1  |
| LU14_L  | 4  | 4 | 4  | 163,954,618 | 138,524,731 | 4q32.2 | 4q28.3  |
| LU14_L  | 3  | 4 | 4  | 163,980,778 | 122,906,536 | 4q32.2 | 4q27    |
| LU21_L  | 5  | 3 | 6  | 164,056,874 | 87,184,937  | 3q26.1 | 6q14.3  |
| LU4_AD  | 18 | 5 | 23 | 164,069,743 | 85,166,559  | 5q34   | Xq21.2  |
| LU18_AD | 3  | 3 | 16 | 164,534,562 | 21,640,662  | 3q26.1 | 16p12.2 |

|         |    |   |    |             |             |        |          |
|---------|----|---|----|-------------|-------------|--------|----------|
| LU18_AD | 3  | 6 | 6  | 164,563,675 | 164,595,732 | 6q27   | 6q27     |
| LU18_AD | 3  | 6 | 6  | 164,595,732 | 164,563,675 | 6q27   | 6q27     |
| LU4_AD  | 12 | 5 | 7  | 164,626,640 | 52,802,723  | 5q34   | 7p12.1   |
| LU4_AD  | 9  | 5 | 19 | 164,631,878 | 58,358,952  | 5q34   | 19q13.43 |
| LU4_AD  | 5  | 5 | 7  | 164,651,034 | 52,795,548  | 5q34   | 7p12.1   |
| LU12_L  | 3  | 6 | 1  | 164,761,030 | 229,316,338 | 6q27   | 1q42.13  |
| LU4_AD  | 4  | 5 | 5  | 164,820,355 | 56,826,352  | 5q34   | 5q11.2   |
| LU3_AD  | 5  | 1 | 1  | 164,977,840 | 165,009,915 | 1q23.3 | 1q23.3   |
| LU3_AD  | 5  | 1 | 1  | 165,009,915 | 164,977,840 | 1q23.3 | 1q23.3   |
| LU3_AD  | 3  | 4 | 4  | 165,101,062 | 165,136,263 | 4q32.3 | 4q32.3   |
| LU14_L  | 3  | 4 | 4  | 165,104,071 | 86,356,608  | 4q32.3 | 4q21.23  |
| LU3_AD  | 3  | 4 | 4  | 165,136,263 | 165,101,062 | 4q32.3 | 4q32.3   |
| LU3_L   | 3  | 4 | 1  | 165,178,108 | 253,565     | 4q32.3 | 1p36.33  |
| LU7_L   | 6  | 4 | 17 | 165,531,132 | 67,499,795  | 4q32.3 | 17q24.3  |
| LU21_AD | 3  | 4 | 2  | 165,671,337 | 120,134,078 | 4q32.3 | 2q14.2   |
| LU18_AD | 35 | 2 | 12 | 165,842,686 | 63,744,775  | 2q24.3 | 12q14.2  |
| LU18_L  | 24 | 2 | 12 | 165,844,314 | 63,743,104  | 2q24.3 | 12q14.2  |
| LU15_L  | 3  | 6 | 4  | 165,873,007 | 177,266,462 | 6q27   | 4q34.2   |
| LU3_L   | 3  | 6 | 20 | 165,873,195 | 5,280,563   | 6q27   | 20p12.3  |
| LU3_L   | 3  | 6 | 4  | 165,877,442 | 92,099,055  | 6q27   | 4q22.1   |
| LU6_L   | 6  | 2 | 9  | 165,976,047 | 14,605,064  | 2q24.3 | 9p22.3   |
| LU3_L   | 3  | 6 | 6  | 166,190,522 | 166,220,809 | 6q27   | 6q27     |
| LU3_L   | 3  | 6 | 6  | 166,220,809 | 166,190,522 | 6q27   | 6q27     |
| LU18_L  | 4  | 3 | 3  | 166,223,415 | 6,436,630   | 3q26.1 | 3p26.1   |
| LU18_L  | 3  | 2 | 2  | 166,237,573 | 167,063,271 | 2q24.3 | 2q24.3   |
| LU20_AD | 5  | 1 | 4  | 166,575,496 | 191,028,394 | 1q24.1 | 4q35.2   |
| LU8_L   | 3  | 1 | 4  | 166,578,717 | 9,664,702   | 1q24.1 | 4p16.1   |
| LU4_AD  | 21 | 5 | 5  | 166,615,275 | 169,245,810 | 5q34   | 5q35.1   |
| LU4_AD  | 3  | 5 | 5  | 166,745,444 | 172,444,797 | 5q34   | 5q35.1   |
| LU4_AD  | 15 | 6 | 6  | 166,747,376 | 166,457,616 | 6q27   | 6q27     |
| LU3_L   | 4  | 2 | 2  | 166,794,136 | 166,827,458 | 2q24.3 | 2q24.3   |
| LU4_AD  | 9  | 5 | 5  | 166,825,401 | 167,132,050 | 5q34   | 5q34     |
| LU3_L   | 4  | 2 | 2  | 166,827,458 | 166,794,136 | 2q24.3 | 2q24.3   |
| LU4_AD  | 7  | 5 | 5  | 166,902,741 | 158,613,190 | 5q34   | 5q33.3   |
| LU21_AD | 8  | 5 | 5  | 166,998,270 | 167,911,270 | 5q34   | 5q34     |
| LU4_AD  | 4  | 5 | 5  | 167,001,671 | 172,392,565 | 5q34   | 5q35.1   |
| LU4_AD  | 7  | 5 | 5  | 167,040,360 | 172,248,472 | 5q34   | 5q35.1   |
| LU18_L  | 3  | 2 | 2  | 167,063,271 | 166,237,573 | 2q24.3 | 2q24.3   |
| LU4_AD  | 9  | 5 | 5  | 167,132,050 | 166,825,401 | 5q34   | 5q34     |
| LU15_L  | 5  | 3 | 6  | 167,148,241 | 40,829,562  | 3q26.1 | 6p21.1   |
| LU18_L  | 3  | 3 | 2  | 167,265,523 | 44,871,369  | 3q26.1 | 2p21     |
| LU8_AD  | 3  | 6 | 3  | 167,310,126 | 163,414,105 | 6q27   | 3q26.1   |
| LU18_AD | 27 | 6 | 8  | 167,333,893 | 98,863,550  | 6q27   | 8q22.1   |
| LU18_L  | 25 | 6 | 8  | 167,334,518 | 98,863,763  | 6q27   | 8q22.1   |

|         |    |   |    |             |             |         |          |
|---------|----|---|----|-------------|-------------|---------|----------|
| LU20_AD | 4  | 2 | 2  | 167,362,403 | 167,396,076 | 2q24.3  | 2q24.3   |
| LU20_AD | 4  | 2 | 2  | 167,396,076 | 167,362,403 | 2q24.3  | 2q24.3   |
| LU21_AD | 7  | 5 | 9  | 167,819,303 | 29,577,779  | 5q34    | 9p21.1   |
| LU4_AD  | 3  | 3 | 3  | 167,899,660 | 167,940,943 | 3q26.2  | 3q26.2   |
| LU21_AD | 8  | 5 | 5  | 167,911,270 | 166,998,270 | 5q34    | 5q34     |
| LU4_AD  | 3  | 5 | 7  | 167,934,106 | 45,361,843  | 5q34    | 7p13     |
| LU4_AD  | 3  | 3 | 3  | 167,940,943 | 167,899,660 | 3q26.2  | 3q26.2   |
| LU16_AD | 4  | 4 | 3  | 168,362,328 | 152,316,416 | 4q32.3  | 3q25.2   |
| LU3_L   | 3  | 4 | 4  | 168,428,441 | 168,465,572 | 4q32.3  | 4q32.3   |
| LU3_L   | 3  | 4 | 4  | 168,465,572 | 168,428,441 | 4q32.3  | 4q32.3   |
| LU16_AD | 3  | 1 | 1  | 168,473,200 | 168,504,624 | 1q24.2  | 1q24.2   |
| LU16_AD | 3  | 1 | 1  | 168,504,624 | 168,473,200 | 1q24.2  | 1q24.2   |
| LU4_L   | 3  | 1 | 1  | 168,530,452 | 168,560,491 | 1q24.2  | 1q24.2   |
| LU3_L   | 4  | 2 | 2  | 168,552,483 | 168,597,052 | 2q24.3  | 2q24.3   |
| LU4_L   | 3  | 1 | 1  | 168,560,491 | 168,530,452 | 1q24.2  | 1q24.2   |
| LU3_L   | 4  | 2 | 2  | 168,597,052 | 168,552,483 | 2q24.3  | 2q24.3   |
| LU12_AD | 5  | 4 | 6  | 168,797,286 | 81,362,758  | 4q32.3  | 6q14.1   |
| LU4_AD  | 6  | 5 | 10 | 169,065,363 | 55,114,243  | 5q35.1  | 10q21.1  |
| LU3_L   | 3  | 2 | 23 | 169,114,096 | 120,587,973 | 2q24.3  | Xq24     |
| LU3_L   | 5  | 3 | 3  | 169,167,759 | 169,199,656 | 3q26.2  | 3q26.2   |
| LU3_L   | 5  | 3 | 3  | 169,199,656 | 169,167,759 | 3q26.2  | 3q26.2   |
| LU4_AD  | 21 | 5 | 5  | 169,245,810 | 166,615,275 | 5q35.1  | 5q34     |
| LU18_AD | 3  | 5 | 5  | 169,407,396 | 169,458,225 | 5q35.1  | 5q35.1   |
| LU18_AD | 3  | 5 | 5  | 169,458,225 | 169,407,396 | 5q35.1  | 5q35.1   |
| LU4_L   | 4  | 1 | 7  | 169,635,010 | 144,117,779 | 1q24.2  | 7q35     |
| LU20_AD | 5  | 2 | 2  | 169,656,117 | 169,690,237 | 2q24.3  | 2q24.3   |
| LU20_AD | 5  | 2 | 2  | 169,690,237 | 169,656,117 | 2q24.3  | 2q24.3   |
| LU4_AD  | 4  | 5 | 16 | 169,941,847 | 207,022     | 5q35.1  | 16p13.3  |
| LU20_AD | 5  | 6 | 22 | 170,116,072 | 25,744,045  | 6q27    | 22q11.23 |
| LU5_L   | 3  | 6 | 6  | 170,235,690 | 170,272,495 | 6q27    | 6q27     |
| LU5_L   | 3  | 6 | 6  | 170,272,495 | 170,235,690 | 6q27    | 6q27     |
| LU3_L   | 6  | 5 | 5  | 170,315,808 | 170,352,068 | 5q35.1  | 5q35.1   |
| LU3_L   | 6  | 5 | 5  | 170,352,068 | 170,315,808 | 5q35.1  | 5q35.1   |
| LU4_AD  | 4  | 1 | 6  | 170,909,985 | 110,198,905 | 1q24.3  | 6q21     |
| LU21_L  | 3  | 6 | 5  | 170,932,938 | 180,781,211 | 6q27    | 5q35.3   |
| LU11_AD | 7  | 2 | 8  | 171,005,635 | 5,580,389   | 2q31.1  | 8p23.2   |
| LU18_L  | 3  | 1 | 15 | 171,238,601 | 71,453,905  | 1q24.3  | 15q23    |
| LU18_L  | 5  | 2 | 11 | 171,472,714 | 92,674,334  | 2q31.1  | 11q14.3  |
| LU4_AD  | 3  | 1 | 4  | 171,566,215 | 116,877,557 | 1q24.3  | 4q26     |
| LU18_L  | 4  | 1 | 20 | 171,571,646 | 15,960,954  | 1q24.3  | 20p12.1  |
| LU4_AD  | 7  | 5 | 5  | 171,616,593 | 174,935,929 | 5q35.1  | 5q35.2   |
| LU4_AD  | 3  | 2 | 9  | 171,906,735 | 125,449,309 | 2q31.1  | 9q33.2   |
| LU21_AD | 12 | 5 | 5  | 172,007,628 | 20,060,621  | 5q35.1  | 5p14.3   |
| LU3_L   | 3  | 3 | 3  | 172,138,482 | 116,363,398 | 3q26.31 | 3q13.31  |

|         |    |   |    |             |             |         |          |
|---------|----|---|----|-------------|-------------|---------|----------|
| LU4_AD  | 37 | 5 | 5  | 172,152,688 | 59,198,365  | 5q35.1  | 5q12.1   |
| LU4_L   | 4  | 3 | 3  | 172,178,598 | 172,208,489 | 3q26.31 | 3q26.31  |
| LU4_L   | 4  | 3 | 3  | 172,208,489 | 172,178,598 | 3q26.31 | 3q26.31  |
| LU4_AD  | 7  | 5 | 5  | 172,248,472 | 167,040,360 | 5q35.1  | 5q34     |
| LU4_AD  | 4  | 5 | 5  | 172,392,565 | 167,001,671 | 5q35.1  | 5q34     |
| LU4_AD  | 5  | 5 | 5  | 172,423,822 | 61,148,207  | 5q35.1  | 5q12.1   |
| LU4_AD  | 3  | 5 | 5  | 172,444,797 | 166,745,444 | 5q35.1  | 5q34     |
| LU4_AD  | 8  | 5 | 5  | 172,730,332 | 61,937,485  | 5q35.1  | 5q12.1   |
| LU3_L   | 3  | 5 | 5  | 172,751,586 | 172,781,508 | 5q35.1  | 5q35.1   |
| LU3_L   | 3  | 5 | 5  | 172,781,508 | 172,751,586 | 5q35.1  | 5q35.1   |
| LU4_AD  | 12 | 5 | 23 | 173,026,999 | 88,403,372  | 5q35.2  | Xq21.31  |
| LU4_AD  | 7  | 5 | 23 | 173,027,818 | 84,386,059  | 5q35.2  | Xq21.1   |
| LU20_L  | 3  | 1 | 8  | 173,339,186 | 54,053,705  | 1q25.1  | 8q11.23  |
| LU18_AD | 3  | 1 | 3  | 173,345,272 | 163,520,947 | 1q25.1  | 3q26.1   |
| LU20_AD | 4  | 1 | 1  | 173,382,352 | 173,423,473 | 1q25.1  | 1q25.1   |
| LU3_L   | 3  | 2 | 11 | 173,407,147 | 96,455,541  | 2q31.1  | 11q21    |
| LU20_AD | 4  | 1 | 1  | 173,423,473 | 173,382,352 | 1q25.1  | 1q25.1   |
| LU20_L  | 3  | 4 | 4  | 173,498,057 | 173,530,717 | 4q34.1  | 4q34.1   |
| LU20_L  | 3  | 4 | 4  | 173,530,717 | 173,498,057 | 4q34.1  | 4q34.1   |
| LU4_AD  | 7  | 5 | 5  | 173,546,511 | 173,579,796 | 5q35.2  | 5q35.2   |
| LU4_AD  | 7  | 5 | 5  | 173,579,796 | 173,546,511 | 5q35.2  | 5q35.2   |
| LU20_AD | 3  | 3 | 3  | 173,709,454 | 173,739,940 | 3q26.31 | 3q26.31  |
| LU20_AD | 3  | 3 | 3  | 173,739,940 | 173,709,454 | 3q26.31 | 3q26.31  |
| LU3_L   | 3  | 5 | 5  | 173,944,572 | 173,980,725 | 5q35.2  | 5q35.2   |
| LU3_L   | 3  | 5 | 5  | 173,980,725 | 173,944,572 | 5q35.2  | 5q35.2   |
| LU18_L  | 3  | 4 | 10 | 174,025,280 | 61,525,378  | 4q34.1  | 10q21.2  |
| LU4_AD  | 3  | 5 | 5  | 174,083,536 | 162,344,979 | 5q35.2  | 5q34     |
| LU4_AD  | 4  | 5 | 5  | 174,121,203 | 175,264,235 | 5q35.2  | 5q35.2   |
| LU4_AD  | 3  | 5 | 5  | 174,401,209 | 174,445,426 | 5q35.2  | 5q35.2   |
| LU4_AD  | 3  | 5 | 5  | 174,445,426 | 174,401,209 | 5q35.2  | 5q35.2   |
| LU4_AD  | 4  | 4 | 11 | 174,699,234 | 12,635,201  | 4q34.1  | 11p15.3  |
| LU18_AD | 3  | 5 | 5  | 174,853,626 | 174,897,289 | 5q35.2  | 5q35.2   |
| LU18_AD | 3  | 5 | 5  | 174,897,289 | 174,853,626 | 5q35.2  | 5q35.2   |
| LU4_AD  | 7  | 5 | 5  | 174,935,929 | 171,616,593 | 5q35.2  | 5q35.1   |
| LU14_L  | 5  | 1 | 1  | 174,935,942 | 155,105,801 | 1q25.1  | 1q22     |
| LU14_AD | 13 | 1 | 1  | 174,938,623 | 155,107,846 | 1q25.1  | 1q22     |
| LU3_L   | 4  | 1 | 24 | 175,068,466 | 16,004,217  | 1q25.1  | Yq11.221 |
| LU4_L   | 3  | 5 | 5  | 175,151,377 | 175,183,477 | 5q35.2  | 5q35.2   |
| LU4_L   | 3  | 5 | 5  | 175,183,477 | 175,151,377 | 5q35.2  | 5q35.2   |
| LU4_AD  | 4  | 5 | 5  | 175,264,235 | 174,121,203 | 5q35.2  | 5q35.2   |
| LU18_L  | 4  | 3 | 2  | 175,544,894 | 189,036,552 | 3q26.31 | 2q32.1   |
| LU3_L   | 3  | 4 | 10 | 175,901,933 | 85,727,092  | 4q34.1  | 10q23.1  |
| LU6_AD  | 4  | 5 | 5  | 176,027,314 | 176,143,661 | 5q35.2  | 5q35.2   |
| LU6_AD  | 4  | 5 | 5  | 176,143,661 | 176,027,314 | 5q35.2  | 5q35.2   |

|         |    |   |    |             |             |         |          |
|---------|----|---|----|-------------|-------------|---------|----------|
| LU5_AD  | 3  | 3 | 3  | 176,391,226 | 176,422,271 | 3q26.32 | 3q26.32  |
| LU5_AD  | 3  | 3 | 3  | 176,422,271 | 176,391,226 | 3q26.32 | 3q26.32  |
| LU16_L  | 5  | 1 | 1  | 176,620,723 | 98,241,142  | 1q25.2  | 1p21.3   |
| LU16_AD | 18 | 1 | 1  | 176,621,237 | 98,241,163  | 1q25.2  | 1p21.3   |
| LU3_AD  | 5  | 5 | 12 | 176,689,789 | 46,950,712  | 5q35.3  | 12q13.11 |
| LU18_AD | 6  | 3 | 3  | 176,736,551 | 193,321,578 | 3q26.32 | 3q29     |
| LU21_L  | 4  | 5 | 9  | 177,173,977 | 22,042,793  | 5q35.3  | 9p21.3   |
| LU21_AD | 7  | 5 | 9  | 177,174,229 | 22,042,803  | 5q35.3  | 9p21.3   |
| LU8_L   | 4  | 4 | 5  | 177,266,196 | 19,706,178  | 4q34.2  | 5p14.3   |
| LU15_L  | 3  | 4 | 6  | 177,266,462 | 165,873,007 | 4q34.2  | 6q27     |
| LU20_L  | 4  | 4 | 2  | 177,270,599 | 99,884,461  | 4q34.2  | 2q11.2   |
| LU4_AD  | 15 | 5 | 5  | 177,410,532 | 57,938,433  | 5q35.3  | 5q11.2   |
| LU21_L  | 3  | 2 | 12 | 178,081,317 | 52,106,582  | 2q31.2  | 12q13.13 |
| LU4_L   | 3  | 3 | 3  | 178,369,936 | 178,402,059 | 3q26.32 | 3q26.32  |
| LU4_L   | 3  | 3 | 3  | 178,402,059 | 178,369,936 | 3q26.32 | 3q26.32  |
| LU4_AD  | 3  | 1 | 10 | 178,524,626 | 132,094,133 | 1q25.2  | 10q26.3  |
| LU18_L  | 83 | 5 | 8  | 178,666,006 | 71,245,750  | 5q35.3  | 8q13.3   |
| LU18_AD | 68 | 5 | 8  | 178,672,002 | 71,241,281  | 5q35.3  | 8q13.3   |
| LU18_AD | 7  | 5 | 8  | 178,680,690 | 71,238,718  | 5q35.3  | 8q13.3   |
| LU6_AD  | 5  | 5 | 5  | 178,785,134 | 42,011,709  | 5q35.3  | 5p13.1   |
| LU3_L   | 3  | 1 | 1  | 179,035,613 | 113,509,640 | 1q25.2  | 1p13.2   |
| LU16_L  | 14 | 1 | 1  | 179,096,259 | 68,105,195  | 1q25.2  | 1p31.3   |
| LU16_AD | 6  | 1 | 1  | 179,096,417 | 68,105,687  | 1q25.2  | 1p31.3   |
| LU4_AD  | 4  | 4 | 23 | 179,145,623 | 25,443,695  | 4q34.3  | Xp21.3   |
| LU21_L  | 6  | 5 | 9  | 179,153,939 | 39,045,847  | 5q35.3  | 9p13.1   |
| LU21_AD | 6  | 5 | 9  | 179,155,246 | 39,044,641  | 5q35.3  | 9p13.1   |
| LU16_AD | 5  | 5 | 5  | 180,112,754 | 180,215,588 | 5q35.3  | 5q35.3   |
| LU21_L  | 3  | 1 | 1  | 180,172,613 | 180,207,959 | 1q25.2  | 1q25.2   |
| LU21_L  | 3  | 1 | 1  | 180,207,959 | 180,172,613 | 1q25.2  | 1q25.2   |
| LU16_AD | 5  | 5 | 5  | 180,215,588 | 180,112,754 | 5q35.3  | 5q35.3   |
| LU14_L  | 3  | 5 | 1  | 180,774,885 | 224,118,415 | 5q35.3  | 1q42.11  |
| LU21_L  | 3  | 5 | 6  | 180,781,211 | 170,932,938 | 5q35.3  | 6q27     |
| LU18_AD | 3  | 1 | 4  | 181,218,768 | 140,559,968 | 1q25.3  | 4q31.1   |
| LU20_AD | 3  | 1 | 17 | 181,220,789 | 26,017,992  | 1q25.3  | 17q11.2  |
| LU14_L  | 4  | 1 | 12 | 181,407,746 | 70,913,188  | 1q25.3  | 12q15    |
| LU3_AD  | 6  | 4 | 4  | 181,446,129 | 181,494,693 | 4q34.3  | 4q34.3   |
| LU3_AD  | 6  | 4 | 4  | 181,494,693 | 181,446,129 | 4q34.3  | 4q34.3   |
| LU3_L   | 4  | 3 | 15 | 181,701,984 | 48,912,098  | 3q26.33 | 15q21.1  |
| LU21_AD | 3  | 2 | 2  | 181,956,786 | 181,988,629 | 2q31.3  | 2q31.3   |
| LU21_AD | 3  | 2 | 2  | 181,988,629 | 181,956,786 | 2q31.3  | 2q31.3   |
| LU21_AD | 3  | 4 | 4  | 182,043,131 | 182,074,480 | 4q34.3  | 4q34.3   |
| LU21_AD | 3  | 4 | 4  | 182,074,480 | 182,043,131 | 4q34.3  | 4q34.3   |
| LU12_AD | 4  | 2 | 2  | 182,444,746 | 130,501,971 | 2q31.3  | 2q21.1   |
| LU20_AD | 3  | 3 | 5  | 183,960,344 | 5,374,711   | 3q27.1  | 5p15.32  |



|         |    |   |    |             |             |        |          |
|---------|----|---|----|-------------|-------------|--------|----------|
| LU3_AD  | 4  | 1 | 1  | 184,211,558 | 184,268,052 | 1q25.3 | 1q25.3   |
| LU3_AD  | 4  | 1 | 1  | 184,268,052 | 184,211,558 | 1q25.3 | 1q25.3   |
| LU4_L   | 3  | 2 | 7  | 184,368,216 | 108,939,514 | 2q32.1 | 7q31.1   |
| LU20_L  | 3  | 2 | 7  | 184,375,123 | 151,727,984 | 2q32.1 | 7q36.1   |
| LU18_AD | 6  | 3 | 5  | 184,731,057 | 1,578,543   | 3q27.2 | 5p15.33  |
| LU20_L  | 3  | 3 | 1  | 184,734,343 | 55,100,637  | 3q27.2 | 1p32.3   |
| LU18_L  | 3  | 3 | 1  | 184,734,715 | 94,912,154  | 3q27.2 | 1p21.3   |
| LU3_AD  | 4  | 3 | 9  | 184,823,773 | 121,395,615 | 3q27.2 | 9q33.1   |
| LU4_AD  | 5  | 3 | 9  | 184,823,994 | 121,399,349 | 3q27.2 | 9q33.1   |
| LU12_L  | 3  | 4 | 9  | 185,479,391 | 45,061,151  | 4q35.1 | 9p11.2   |
| LU7_L   | 4  | 4 | 9  | 185,487,713 | 45,057,008  | 4q35.1 | 9p11.2   |
| LU5_L   | 3  | 2 | 2  | 185,727,619 | 185,788,652 | 2q32.1 | 2q32.1   |
| LU5_L   | 3  | 2 | 2  | 185,788,652 | 185,727,619 | 2q32.1 | 2q32.1   |
| LU18_AD | 3  | 4 | 12 | 185,972,053 | 94,751,095  | 4q35.1 | 12q22    |
| LU18_L  | 3  | 2 | 2  | 186,485,567 | 186,527,940 | 2q32.1 | 2q32.1   |
| LU7_AD  | 4  | 3 | 23 | 186,507,186 | 52,861,315  | 3q27.3 | Xp11.22  |
| LU18_L  | 3  | 2 | 2  | 186,527,940 | 186,485,567 | 2q32.1 | 2q32.1   |
| LU3_AD  | 16 | 1 | 1  | 186,671,976 | 209,987,778 | 1q31.1 | 1q32.2   |
| LU3_L   | 15 | 1 | 1  | 186,672,531 | 209,986,770 | 1q31.1 | 1q32.2   |
| LU18_L  | 3  | 1 | 15 | 186,883,030 | 55,803,780  | 1q31.1 | 15q21.3  |
| LU5_L   | 3  | 1 | 24 | 186,888,903 | 8,673,824   | 1q31.1 | Yp11.2   |
| LU3_L   | 8  | 4 | 4  | 187,122,683 | 161,414,641 | 4q35.2 | 4q32.1   |
| LU3_AD  | 4  | 2 | 2  | 188,096,890 | 188,147,915 | 2q32.1 | 2q32.1   |
| LU3_AD  | 4  | 2 | 2  | 188,147,915 | 188,096,890 | 2q32.1 | 2q32.1   |
| LU3_L   | 4  | 1 | 5  | 188,231,192 | 129,970,721 | 1q31.1 | 5q23.3   |
| LU4_AD  | 5  | 2 | 2  | 188,647,310 | 188,684,641 | 2q32.1 | 2q32.1   |
| LU4_AD  | 3  | 4 | 4  | 188,680,328 | 188,719,594 | 4q35.2 | 4q35.2   |
| LU4_AD  | 5  | 2 | 2  | 188,684,641 | 188,647,310 | 2q32.1 | 2q32.1   |
| LU4_AD  | 3  | 4 | 4  | 188,719,594 | 188,680,328 | 4q35.2 | 4q35.2   |
| LU3_L   | 4  | 3 | 3  | 188,800,600 | 188,837,534 | 3q28   | 3q28     |
| LU3_L   | 4  | 3 | 3  | 188,837,534 | 188,800,600 | 3q28   | 3q28     |
| LU18_L  | 4  | 2 | 3  | 189,036,552 | 175,544,894 | 2q32.1 | 3q26.31  |
| LU3_L   | 4  | 4 | 4  | 190,411,654 | 190,444,926 | 4q35.2 | 4q35.2   |
| LU3_L   | 4  | 4 | 4  | 190,444,926 | 190,411,654 | 4q35.2 | 4q35.2   |
| LU3_L   | 11 | 4 | 4  | 190,479,141 | 190,509,207 | 4q35.2 | 4q35.2   |
| LU3_L   | 11 | 4 | 4  | 190,509,207 | 190,479,141 | 4q35.2 | 4q35.2   |
| LU18_AD | 5  | 4 | 6  | 190,538,109 | 9,288,305   | 4q35.2 | 6p24.3   |
| LU12_L  | 4  | 3 | 19 | 190,594,362 | 51,107,251  | 3q28   | 19q13.33 |
| LU15_L  | 3  | 3 | 19 | 190,594,813 | 51,106,866  | 3q28   | 19q13.33 |
| LU4_AD  | 4  | 4 | 20 | 190,675,816 | 25,762,716  | 4q35.2 | 20p11.1  |
| LU21_L  | 3  | 4 | 20 | 190,677,777 | 25,762,822  | 4q35.2 | 20p11.1  |
| LU4_L   | 5  | 4 | 9  | 190,679,350 | 67,790,063  | 4q35.2 | 9q13     |
| LU7_L   | 3  | 4 | 12 | 190,816,730 | 34,832,304  | 4q35.2 | 12p11.1  |
| LU18_L  | 3  | 4 | 5  | 190,819,555 | 46,339,539  | 4q35.2 | 5p11     |

|         |    |   |    |             |             |        |          |
|---------|----|---|----|-------------|-------------|--------|----------|
| LU20_AD | 5  | 4 | 1  | 191,028,394 | 166,575,496 | 4q35.2 | 1q24.1   |
| LU3_AD  | 5  | 2 | 2  | 191,065,559 | 191,095,818 | 2q32.2 | 2q32.2   |
| LU3_AD  | 5  | 2 | 2  | 191,095,818 | 191,065,559 | 2q32.2 | 2q32.2   |
| LU21_AD | 4  | 2 | 2  | 191,125,563 | 191,169,814 | 2q32.2 | 2q32.2   |
| LU21_AD | 4  | 2 | 2  | 191,169,814 | 191,125,563 | 2q32.2 | 2q32.2   |
| LU3_AD  | 5  | 1 | 1  | 191,338,363 | 191,376,170 | 1q31.2 | 1q31.2   |
| LU3_AD  | 3  | 2 | 2  | 191,354,490 | 191,384,390 | 2q32.2 | 2q32.2   |
| LU7_L   | 8  | 3 | 1  | 191,374,165 | 206,209,695 | 3q28   | 1q32.1   |
| LU7_AD  | 5  | 3 | 1  | 191,375,179 | 206,209,253 | 3q28   | 1q32.1   |
| LU3_AD  | 5  | 1 | 1  | 191,376,170 | 191,338,363 | 1q31.2 | 1q31.2   |
| LU3_AD  | 3  | 2 | 2  | 191,384,390 | 191,354,490 | 2q32.2 | 2q32.2   |
| LU15_L  | 3  | 1 | 1  | 191,499,102 | 191,533,681 | 1q31.2 | 1q31.2   |
| LU15_L  | 3  | 1 | 1  | 191,533,681 | 191,499,102 | 1q31.2 | 1q31.2   |
| LU7_L   | 4  | 2 | 2  | 192,577,108 | 242,690,649 | 2q32.3 | 2q37.3   |
| LU14_L  | 9  | 3 | 3  | 192,789,543 | 192,894,441 | 3q29   | 3q29     |
| LU14_L  | 9  | 3 | 3  | 192,894,441 | 192,789,543 | 3q29   | 3q29     |
| LU11_AD | 4  | 1 | 1  | 193,169,998 | 193,243,753 | 1q31.2 | 1q31.2   |
| LU11_AD | 4  | 1 | 1  | 193,243,753 | 193,169,998 | 1q31.2 | 1q31.2   |
| LU18_AD | 6  | 3 | 3  | 193,321,578 | 176,736,551 | 3q29   | 3q26.32  |
| LU8_L   | 3  | 2 | 5  | 194,393,304 | 78,289,120  | 2q32.3 | 5q14.1   |
| LU4_L   | 3  | 1 | 3  | 194,895,556 | 116,292,089 | 1q31.3 | 3q13.31  |
| LU3_L   | 3  | 2 | 2  | 195,249,644 | 195,279,261 | 2q32.3 | 2q32.3   |
| LU3_L   | 3  | 2 | 2  | 195,279,261 | 195,249,644 | 2q32.3 | 2q32.3   |
| LU18_AD | 6  | 3 | 12 | 195,679,263 | 67,132,543  | 3q29   | 12q14.3  |
| LU18_L  | 9  | 3 | 12 | 195,679,465 | 67,131,891  | 3q29   | 12q14.3  |
| LU20_L  | 4  | 1 | 4  | 196,181,108 | 73,030,844  | 1q31.3 | 4q13.3   |
| LU3_AD  | 15 | 1 | 1  | 197,253,236 | 169,308,180 | 1q31.3 | 1q24.2   |
| LU3_L   | 8  | 1 | 1  | 197,255,014 | 169,308,357 | 1q31.3 | 1q24.2   |
| LU3_L   | 3  | 2 | 2  | 197,302,852 | 197,332,468 | 2q32.3 | 2q32.3   |
| LU3_L   | 3  | 2 | 2  | 197,332,468 | 197,302,852 | 2q32.3 | 2q32.3   |
| LU15_L  | 3  | 3 | 5  | 197,361,907 | 26,222,314  | 3q29   | 5p14.1   |
| LU14_AD | 4  | 1 | 1  | 197,587,033 | 222,625,262 | 1q31.3 | 1q41     |
| LU8_L   | 3  | 3 | 24 | 197,846,737 | 19,629,113  | 3q29   | Yq11.221 |
| LU14_AD | 7  | 1 | 1  | 197,858,059 | 223,830,985 | 1q31.3 | 1q41     |
| LU14_AD | 3  | 1 | 1  | 197,877,710 | 222,620,376 | 1q31.3 | 1q41     |
| LU14_AD | 5  | 1 | 1  | 197,885,051 | 211,927,145 | 1q31.3 | 1q32.3   |
| LU4_AD  | 5  | 3 | 1  | 197,913,518 | 338,891     | 3q29   | 1p36.33  |
| LU20_AD | 3  | 3 | 1  | 197,918,637 | 664,882     | 3q29   | 1p36.33  |
| LU14_AD | 3  | 1 | 1  | 197,923,457 | 221,643,288 | 1q31.3 | 1q41     |
| LU21_L  | 4  | 2 | 2  | 198,750,554 | 198,786,179 | 2q33.1 | 2q33.1   |
| LU21_L  | 4  | 2 | 2  | 198,786,179 | 198,750,554 | 2q33.1 | 2q33.1   |
| LU14_AD | 13 | 1 | 1  | 199,015,059 | 222,326,744 | 1q32.1 | 1q41     |
| LU3_L   | 5  | 1 | 1  | 199,187,657 | 199,224,363 | 1q32.1 | 1q32.1   |
| LU3_L   | 5  | 1 | 1  | 199,224,363 | 199,187,657 | 1q32.1 | 1q32.1   |

|         |   |   |    |             |             |        |          |
|---------|---|---|----|-------------|-------------|--------|----------|
| LU3_AD  | 5 | 2 | 2  | 200,553,708 | 200,584,249 | 2q33.1 | 2q33.1   |
| LU3_AD  | 5 | 2 | 2  | 200,584,249 | 200,553,708 | 2q33.1 | 2q33.1   |
| LU3_L   | 3 | 2 | 2  | 200,957,215 | 200,998,756 | 2q33.1 | 2q33.1   |
| LU3_L   | 3 | 2 | 2  | 200,998,756 | 200,957,215 | 2q33.1 | 2q33.1   |
| LU14_AD | 6 | 1 | 1  | 201,133,429 | 211,909,221 | 1q32.1 | 1q32.3   |
| LU14_AD | 9 | 1 | 1  | 201,138,418 | 221,208,016 | 1q32.1 | 1q41     |
| LU4_AD  | 6 | 1 | 1  | 201,589,569 | 150,605,713 | 1q32.1 | 1q21.3   |
| LU18_AD | 3 | 2 | 9  | 201,928,656 | 4,944,438   | 2q33.1 | 9p24.1   |
| LU3_L   | 3 | 2 | 2  | 202,171,284 | 202,203,773 | 2q33.1 | 2q33.1   |
| LU3_L   | 3 | 2 | 2  | 202,203,773 | 202,171,284 | 2q33.1 | 2q33.1   |
| LU3_AD  | 3 | 1 | 1  | 202,366,475 | 202,404,181 | 1q32.1 | 1q32.1   |
| LU3_AD  | 3 | 1 | 1  | 202,404,181 | 202,366,475 | 1q32.1 | 1q32.1   |
| LU4_AD  | 4 | 1 | 9  | 202,834,284 | 34,668,662  | 1q32.1 | 9p13.3   |
| LU14_AD | 7 | 1 | 1  | 203,266,042 | 219,206,647 | 1q32.1 | 1q41     |
| LU14_AD | 3 | 1 | 1  | 203,340,156 | 204,296,803 | 1q32.1 | 1q32.1   |
| LU18_L  | 3 | 1 | 2  | 204,205,213 | 147,303,848 | 1q32.1 | 2q22.3   |
| LU14_AD | 8 | 1 | 1  | 204,286,875 | 222,425,061 | 1q32.1 | 1q41     |
| LU14_AD | 3 | 1 | 1  | 204,296,803 | 203,340,156 | 1q32.1 | 1q32.1   |
| LU14_AD | 3 | 1 | 1  | 204,606,995 | 222,519,110 | 1q32.1 | 1q41     |
| LU8_AD  | 4 | 2 | 2  | 204,824,756 | 207,672,453 | 2q33.2 | 2q33.3   |
| LU12_AD | 4 | 2 | 13 | 204,829,287 | 61,665,368  | 2q33.2 | 13q21.2  |
| LU12_AD | 3 | 1 | 6  | 205,836,678 | 85,417,944  | 1q32.1 | 6q14.3   |
| LU7_AD  | 5 | 1 | 3  | 206,209,253 | 191,375,179 | 1q32.1 | 3q28     |
| LU7_L   | 8 | 1 | 3  | 206,209,695 | 191,374,165 | 1q32.1 | 3q28     |
| LU21_L  | 4 | 1 | 4  | 206,283,385 | 92,276,048  | 1q32.1 | 4q22.1   |
| LU18_L  | 3 | 1 | 12 | 206,286,638 | 68,938,175  | 1q32.1 | 12q15    |
| LU4_L   | 3 | 1 | 1  | 207,034,417 | 153,074,023 | 1q32.1 | 1q21.3   |
| LU4_AD  | 5 | 1 | 1  | 207,034,587 | 153,072,619 | 1q32.1 | 1q21.3   |
| LU14_AD | 4 | 1 | 10 | 207,194,662 | 125,557,657 | 1q32.1 | 10q26.13 |
| LU16_AD | 5 | 2 | 17 | 207,579,498 | 33,120,271  | 2q33.3 | 17q12    |
| LU21_AD | 3 | 2 | 17 | 207,580,405 | 33,119,601  | 2q33.3 | 17q12    |
| LU20_AD | 4 | 1 | 22 | 207,634,822 | 51,125,575  | 1q32.2 | 22q13.33 |
| LU18_L  | 3 | 2 | 5  | 207,670,846 | 120,034,275 | 2q33.3 | 5q23.1   |
| LU8_AD  | 4 | 2 | 2  | 207,672,453 | 204,824,756 | 2q33.3 | 2q33.2   |
| LU8_L   | 3 | 1 | 1  | 207,750,939 | 207,782,740 | 1q32.2 | 1q32.2   |
| LU3_L   | 4 | 1 | 5  | 207,763,118 | 151,400,904 | 1q32.2 | 5q33.1   |
| LU8_L   | 3 | 1 | 1  | 207,782,740 | 207,750,939 | 1q32.2 | 1q32.2   |
| LU8_AD  | 4 | 2 | 4  | 207,883,627 | 157,028,074 | 2q33.3 | 4q32.1   |
| LU12_L  | 4 | 2 | 4  | 207,884,294 | 20,634,982  | 2q33.3 | 4p15.31  |
| LU14_AD | 5 | 1 | 1  | 208,183,231 | 224,064,402 | 1q32.2 | 1q41     |
| LU21_L  | 4 | 2 | 1  | 208,262,333 | 162,281,458 | 2q33.3 | 1q23.3   |
| LU11_AD | 3 | 2 | 5  | 208,475,786 | 78,421,769  | 2q33.3 | 5q14.1   |
| LU14_AD | 6 | 1 | 1  | 208,861,884 | 218,669,250 | 1q32.2 | 1q41     |
| LU3_AD  | 4 | 1 | 1  | 209,236,075 | 209,267,179 | 1q32.2 | 1q32.2   |

|         |    |   |    |             |             |        |         |
|---------|----|---|----|-------------|-------------|--------|---------|
| LU18_L  | 3  | 2 | 5  | 209,259,270 | 114,417,304 | 2q34   | 5q22.3  |
| LU3_AD  | 4  | 1 | 1  | 209,267,179 | 209,236,075 | 1q32.2 | 1q32.2  |
| LU3_L   | 5  | 2 | 2  | 209,554,871 | 209,596,228 | 2q34   | 2q34    |
| LU3_L   | 5  | 2 | 2  | 209,596,228 | 209,554,871 | 2q34   | 2q34    |
| LU4_AD  | 23 | 1 | 1  | 209,684,161 | 217,701,485 | 1q32.2 | 1q41    |
| LU4_L   | 11 | 1 | 1  | 209,684,297 | 217,702,204 | 1q32.2 | 1q41    |
| LU4_AD  | 6  | 1 | 10 | 209,856,792 | 38,238,901  | 1q32.2 | 10p11.1 |
| LU4_AD  | 9  | 1 | 10 | 209,884,150 | 82,633,841  | 1q32.2 | 10q23.1 |
| LU3_AD  | 3  | 1 | 1  | 209,887,747 | 209,942,927 | 1q32.2 | 1q32.2  |
| LU3_AD  | 3  | 1 | 1  | 209,942,927 | 209,887,747 | 1q32.2 | 1q32.2  |
| LU14_AD | 7  | 1 | 1  | 209,945,063 | 221,911,876 | 1q32.2 | 1q41    |
| LU3_L   | 15 | 1 | 1  | 209,986,770 | 186,672,531 | 1q32.2 | 1q31.1  |
| LU3_AD  | 16 | 1 | 1  | 209,987,778 | 186,671,976 | 1q32.2 | 1q31.1  |
| LU14_AD | 3  | 1 | 1  | 210,226,208 | 210,259,092 | 1q32.2 | 1q32.2  |
| LU14_AD | 3  | 1 | 1  | 210,259,092 | 210,226,208 | 1q32.2 | 1q32.2  |
| LU16_AD | 4  | 1 | 6  | 210,364,586 | 40,835,401  | 1q32.2 | 6p21.1  |
| LU4_L   | 3  | 1 | 13 | 210,365,506 | 49,441,751  | 1q32.2 | 13q14.2 |
| LU15_L  | 5  | 1 | 6  | 210,365,755 | 40,828,606  | 1q32.2 | 6p21.1  |
| LU14_AD | 6  | 1 | 1  | 210,422,135 | 213,218,943 | 1q32.2 | 1q32.3  |
| LU4_AD  | 12 | 1 | 1  | 210,802,186 | 218,150,159 | 1q32.2 | 1q41    |
| LU3_AD  | 5  | 1 | 1  | 211,217,796 | 211,250,085 | 1q32.2 | 1q32.2  |
| LU3_AD  | 5  | 1 | 1  | 211,250,085 | 211,217,796 | 1q32.2 | 1q32.2  |
| LU18_L  | 4  | 1 | 5  | 211,515,128 | 31,394,141  | 1q32.3 | 5p13.3  |
| LU14_AD | 6  | 1 | 1  | 211,909,221 | 201,133,429 | 1q32.3 | 1q32.1  |
| LU14_AD | 5  | 1 | 1  | 211,927,145 | 197,885,051 | 1q32.3 | 1q31.3  |
| LU18_L  | 3  | 2 | 2  | 212,630,567 | 212,663,676 | 2q34   | 2q34    |
| LU18_L  | 3  | 2 | 2  | 212,663,676 | 212,630,567 | 2q34   | 2q34    |
| LU5_AD  | 3  | 2 | 2  | 212,889,580 | 212,940,937 | 2q34   | 2q34    |
| LU5_AD  | 3  | 2 | 2  | 212,940,937 | 212,889,580 | 2q34   | 2q34    |
| LU14_AD | 6  | 1 | 1  | 213,218,943 | 210,422,135 | 1q32.3 | 1q32.2  |
| LU3_AD  | 3  | 2 | 2  | 213,386,385 | 213,416,213 | 2q34   | 2q34    |
| LU3_AD  | 3  | 2 | 2  | 213,416,213 | 213,386,385 | 2q34   | 2q34    |
| LU20_AD | 3  | 1 | 1  | 214,062,777 | 214,093,764 | 1q32.3 | 1q32.3  |
| LU20_AD | 3  | 1 | 1  | 214,093,764 | 214,062,777 | 1q32.3 | 1q32.3  |
| LU14_AD | 7  | 1 | 1  | 214,141,887 | 224,284,326 | 1q32.3 | 1q42.11 |
| LU14_AD | 6  | 1 | 1  | 214,290,718 | 224,653,811 | 1q32.3 | 1q42.12 |
| LU3_L   | 5  | 1 | 1  | 215,646,167 | 215,681,288 | 1q41   | 1q41    |
| LU3_L   | 5  | 1 | 1  | 215,681,288 | 215,646,167 | 1q41   | 1q41    |
| LU18_L  | 4  | 2 | 12 | 216,787,228 | 68,166,636  | 2q35   | 12q15   |
| LU15_L  | 4  | 2 | 12 | 217,492,521 | 55,381,409  | 2q35   | 12q13.2 |
| LU4_L   | 4  | 1 | 1  | 217,690,203 | 218,156,642 | 1q41   | 1q41    |
| LU4_AD  | 6  | 1 | 1  | 217,691,800 | 218,157,042 | 1q41   | 1q41    |
| LU4_AD  | 23 | 1 | 1  | 217,701,485 | 209,684,161 | 1q41   | 1q32.2  |
| LU4_L   | 11 | 1 | 1  | 217,702,204 | 209,684,297 | 1q41   | 1q32.2  |

|         |    |   |    |             |             |         |         |
|---------|----|---|----|-------------|-------------|---------|---------|
| LU4_AD  | 3  | 2 | 2  | 217,909,427 | 217,939,748 | 2q35    | 2q35    |
| LU4_AD  | 3  | 2 | 2  | 217,939,748 | 217,909,427 | 2q35    | 2q35    |
| LU6_L   | 3  | 2 | 2  | 217,964,036 | 217,994,513 | 2q35    | 2q35    |
| LU6_L   | 3  | 2 | 2  | 217,994,513 | 217,964,036 | 2q35    | 2q35    |
| LU4_AD  | 12 | 1 | 1  | 218,150,159 | 210,802,186 | 1q41    | 1q32.2  |
| LU4_L   | 4  | 1 | 1  | 218,156,642 | 217,690,203 | 1q41    | 1q41    |
| LU4_AD  | 6  | 1 | 1  | 218,157,042 | 217,691,800 | 1q41    | 1q41    |
| LU5_AD  | 3  | 1 | 1  | 218,630,275 | 218,663,807 | 1q41    | 1q41    |
| LU5_AD  | 3  | 1 | 1  | 218,663,807 | 218,630,275 | 1q41    | 1q41    |
| LU14_AD | 6  | 1 | 1  | 218,669,250 | 208,861,884 | 1q41    | 1q32.2  |
| LU14_AD | 4  | 1 | 1  | 218,679,459 | 219,897,937 | 1q41    | 1q41    |
| LU14_AD | 7  | 1 | 1  | 219,206,647 | 203,266,042 | 1q41    | 1q32.1  |
| LU5_L   | 3  | 1 | 1  | 219,577,497 | 219,608,105 | 1q41    | 1q41    |
| LU5_L   | 3  | 1 | 1  | 219,608,105 | 219,577,497 | 1q41    | 1q41    |
| LU14_AD | 4  | 1 | 1  | 219,897,937 | 218,679,459 | 1q41    | 1q41    |
| LU4_AD  | 6  | 1 | 1  | 220,434,022 | 220,203,979 | 1q41    | 1q41    |
| LU18_L  | 3  | 1 | 3  | 220,894,541 | 161,762,754 | 1q41    | 3q26.1  |
| LU14_AD | 6  | 1 | 1  | 221,199,876 | 222,109,840 | 1q41    | 1q41    |
| LU14_AD | 9  | 1 | 1  | 221,208,016 | 201,138,418 | 1q41    | 1q32.1  |
| LU14_AD | 3  | 1 | 1  | 221,643,288 | 197,923,457 | 1q41    | 1q31.3  |
| LU4_L   | 3  | 1 | 1  | 221,821,729 | 221,853,056 | 1q41    | 1q41    |
| LU4_L   | 3  | 1 | 1  | 221,853,056 | 221,821,729 | 1q41    | 1q41    |
| LU14_AD | 7  | 1 | 1  | 221,911,876 | 209,945,063 | 1q41    | 1q32.2  |
| LU3_AD  | 3  | 2 | 2  | 221,912,326 | 221,941,940 | 2q36.1  | 2q36.1  |
| LU3_AD  | 3  | 2 | 2  | 221,941,940 | 221,912,326 | 2q36.1  | 2q36.1  |
| LU14_AD | 6  | 1 | 1  | 222,109,840 | 221,199,876 | 1q41    | 1q41    |
| LU14_AD | 13 | 1 | 1  | 222,326,744 | 199,015,059 | 1q41    | 1q32.1  |
| LU14_AD | 8  | 1 | 1  | 222,425,061 | 204,286,875 | 1q41    | 1q32.1  |
| LU14_AD | 3  | 1 | 1  | 222,519,110 | 204,606,995 | 1q41    | 1q32.1  |
| LU14_AD | 3  | 1 | 1  | 222,620,376 | 197,877,710 | 1q41    | 1q31.3  |
| LU14_AD | 4  | 1 | 1  | 222,625,262 | 197,587,033 | 1q41    | 1q31.3  |
| LU20_L  | 4  | 1 | 7  | 222,651,200 | 65,845,125  | 1q41    | 7q11.21 |
| LU4_AD  | 4  | 1 | 1  | 222,686,567 | 337,369     | 1q41    | 1p36.33 |
| LU18_L  | 9  | 2 | 12 | 222,809,365 | 66,517,045  | 2q36.1  | 12q14.3 |
| LU7_AD  | 3  | 1 | 1  | 223,713,594 | 223,798,686 | 1q41    | 1q41    |
| LU7_AD  | 3  | 1 | 1  | 223,798,686 | 223,713,594 | 1q41    | 1q41    |
| LU14_AD | 7  | 1 | 1  | 223,830,985 | 197,858,059 | 1q41    | 1q31.3  |
| LU14_AD | 5  | 1 | 1  | 224,064,402 | 208,183,231 | 1q41    | 1q32.2  |
| LU14_L  | 3  | 1 | 5  | 224,118,415 | 180,774,885 | 1q42.11 | 5q35.3  |
| LU18_L  | 4  | 1 | 7  | 224,144,763 | 63,199,342  | 1q42.11 | 7q11.21 |
| LU14_AD | 7  | 1 | 1  | 224,284,326 | 214,141,887 | 1q42.11 | 1q32.3  |
| LU14_AD | 6  | 1 | 1  | 224,653,811 | 214,290,718 | 1q42.12 | 1q32.3  |
| LU3_AD  | 3  | 1 | 1  | 224,984,501 | 225,015,782 | 1q42.12 | 1q42.12 |
| LU3_AD  | 3  | 1 | 1  | 225,015,782 | 224,984,501 | 1q42.12 | 1q42.12 |

|         |   |   |    |             |             |         |          |
|---------|---|---|----|-------------|-------------|---------|----------|
| LU12_L  | 3 | 1 | 1  | 225,072,508 | 43,323,343  | 1q42.12 | 1p34.2   |
| LU8_L   | 3 | 1 | 5  | 225,074,609 | 135,073,802 | 1q42.12 | 5q31.1   |
| LU18_AD | 4 | 1 | 1  | 225,074,913 | 228,816,120 | 1q42.12 | 1q42.13  |
| LU3_L   | 3 | 2 | 1  | 225,162,492 | 38,886,269  | 2q36.1  | 1p34.3   |
| LU4_AD  | 3 | 2 | 2  | 225,188,861 | 225,222,800 | 2q36.1  | 2q36.2   |
| LU4_AD  | 3 | 2 | 2  | 225,222,800 | 225,188,861 | 2q36.2  | 2q36.1   |
| LU4_AD  | 8 | 1 | 16 | 226,629,540 | 23,865,633  | 1q42.12 | 16p12.2  |
| LU18_L  | 4 | 1 | 17 | 226,724,201 | 42,097,138  | 1q42.12 | 17q21.31 |
| LU20_AD | 3 | 1 | 19 | 226,726,942 | 20,071,545  | 1q42.12 | 19p12    |
| LU12_AD | 3 | 1 | 13 | 226,803,858 | 57,545,478  | 1q42.12 | 13q21.1  |
| LU8_L   | 3 | 1 | 1  | 226,863,523 | 249,175,506 | 1q42.12 | 1q44     |
| LU3_AD  | 5 | 2 | 2  | 226,959,959 | 226,990,052 | 2q36.3  | 2q36.3   |
| LU4_L   | 3 | 2 | 3  | 226,972,848 | 121,070,104 | 2q36.3  | 3q13.33  |
| LU3_AD  | 5 | 2 | 2  | 226,990,052 | 226,959,959 | 2q36.3  | 2q36.3   |
| LU4_L   | 7 | 1 | 10 | 227,305,832 | 85,937,655  | 1q42.13 | 10q23.1  |
| LU4_AD  | 4 | 1 | 10 | 227,307,647 | 85,935,860  | 1q42.13 | 10q23.1  |
| LU21_AD | 3 | 1 | 24 | 227,714,506 | 20,578,732  | 1q42.13 | Yq11.222 |
| LU4_AD  | 5 | 1 | 23 | 227,867,948 | 50,074,093  | 1q42.13 | Xp11.22  |
| LU4_L   | 4 | 1 | 1  | 227,868,163 | 113,366,841 | 1q42.13 | 1p13.2   |
| LU7_AD  | 3 | 1 | 7  | 227,869,205 | 136,950,790 | 1q42.13 | 7q33     |
| LU8_L   | 4 | 1 | 3  | 227,869,968 | 132,015,159 | 1q42.13 | 3q22.1   |
| LU18_AD | 4 | 1 | 12 | 227,870,054 | 68,933,202  | 1q42.13 | 12q15    |
| LU3_L   | 4 | 1 | 23 | 227,872,617 | 114,773,210 | 1q42.13 | Xq23     |
| LU12_L  | 3 | 1 | 3  | 227,873,610 | 132,014,992 | 1q42.13 | 3q22.1   |
| LU8_L   | 3 | 1 | 11 | 228,153,522 | 50,041,672  | 1q42.13 | 11p11.12 |
| LU3_AD  | 3 | 1 | 11 | 228,153,942 | 50,042,956  | 1q42.13 | 11p11.12 |
| LU20_L  | 6 | 1 | 11 | 228,153,965 | 50,040,118  | 1q42.13 | 11p11.12 |
| LU15_L  | 4 | 1 | 11 | 228,155,932 | 50,039,951  | 1q42.13 | 11p11.12 |
| LU4_AD  | 4 | 1 | 11 | 228,157,113 | 50,039,561  | 1q42.13 | 11p11.12 |
| LU18_AD | 4 | 1 | 1  | 228,816,120 | 225,074,913 | 1q42.13 | 1q42.12  |
| LU4_L   | 4 | 1 | 1  | 229,276,034 | 150,608,814 | 1q42.13 | 1q21.3   |
| LU4_AD  | 8 | 1 | 1  | 229,276,623 | 150,608,282 | 1q42.13 | 1q21.3   |
| LU12_L  | 3 | 1 | 6  | 229,316,338 | 164,761,030 | 1q42.13 | 6q27     |
| LU11_AD | 3 | 1 | 1  | 230,007,710 | 230,040,964 | 1q42.13 | 1q42.13  |
| LU11_AD | 3 | 1 | 1  | 230,040,964 | 230,007,710 | 1q42.13 | 1q42.13  |
| LU4_AD  | 3 | 1 | 1  | 230,059,676 | 230,111,525 | 1q42.13 | 1q42.13  |
| LU4_AD  | 3 | 1 | 1  | 230,111,525 | 230,059,676 | 1q42.13 | 1q42.13  |
| LU3_L   | 3 | 1 | 1  | 230,176,101 | 230,207,192 | 1q42.13 | 1q42.13  |
| LU3_L   | 3 | 1 | 1  | 230,207,192 | 230,176,101 | 1q42.13 | 1q42.13  |
| LU11_AD | 5 | 2 | 19 | 231,437,891 | 42,014,390  | 2q37.1  | 19q13.2  |
| LU8_L   | 3 | 2 | 19 | 231,438,156 | 42,012,220  | 2q37.1  | 19q13.2  |
| LU12_L  | 3 | 2 | 2  | 231,753,356 | 231,830,496 | 2q37.1  | 2q37.1   |
| LU12_L  | 3 | 2 | 2  | 231,830,496 | 231,753,356 | 2q37.1  | 2q37.1   |
| LU8_L   | 4 | 2 | 23 | 232,271,009 | 92,693,562  | 2q37.1  | Xq21.32  |

|         |    |   |    |             |             |        |          |
|---------|----|---|----|-------------|-------------|--------|----------|
| LU3_AD  | 3  | 2 | 11 | 232,271,203 | 67,614,481  | 2q37.1 | 11q13.2  |
| LU3_L   | 3  | 1 | 8  | 232,337,276 | 111,890,730 | 1q42.2 | 8q23.2   |
| LU8_AD  | 3  | 1 | 5  | 232,366,778 | 107,888,882 | 1q42.2 | 5q21.3   |
| LU20_AD | 4  | 1 | 2  | 233,970,940 | 277,906     | 1q42.2 | 2p25.3   |
| LU3_L   | 3  | 1 | 1  | 234,474,894 | 234,505,711 | 1q42.2 | 1q42.2   |
| LU3_L   | 3  | 1 | 1  | 234,505,711 | 234,474,894 | 1q42.2 | 1q42.2   |
| LU12_L  | 3  | 1 | 1  | 234,604,197 | 234,644,100 | 1q42.2 | 1q42.2   |
| LU12_L  | 3  | 1 | 1  | 234,644,100 | 234,604,197 | 1q42.2 | 1q42.2   |
| LU18_L  | 3  | 1 | 5  | 235,304,418 | 116,635,892 | 1q42.3 | 5q23.1   |
| LU4_AD  | 5  | 2 | 7  | 237,095,100 | 23,517,890  | 2q37.2 | 7p15.3   |
| LU4_AD  | 13 | 2 | 7  | 237,119,855 | 19,320,559  | 2q37.2 | 7p21.1   |
| LU4_AD  | 5  | 1 | 1  | 237,302,658 | 237,333,453 | 1q43   | 1q43     |
| LU4_AD  | 5  | 1 | 1  | 237,333,453 | 237,302,658 | 1q43   | 1q43     |
| LU18_AD | 4  | 1 | 1  | 237,410,992 | 237,446,913 | 1q43   | 1q43     |
| LU18_AD | 4  | 1 | 1  | 237,446,913 | 237,410,992 | 1q43   | 1q43     |
| LU8_L   | 3  | 1 | 9  | 238,104,233 | 5,096,353   | 1q43   | 9p24.1   |
| LU20_AD | 4  | 1 | 1  | 238,352,187 | 238,684,611 | 1q43   | 1q43     |
| LU20_AD | 4  | 1 | 1  | 238,684,611 | 238,352,187 | 1q43   | 1q43     |
| LU18_AD | 3  | 2 | 5  | 239,393,785 | 3,323,691   | 2q37.3 | 5p15.33  |
| LU15_L  | 6  | 2 | 2  | 240,259,532 | 240,294,177 | 2q37.3 | 2q37.3   |
| LU15_L  | 6  | 2 | 2  | 240,294,177 | 240,259,532 | 2q37.3 | 2q37.3   |
| LU3_AD  | 3  | 1 | 1  | 240,824,803 | 240,866,502 | 1q43   | 1q43     |
| LU3_AD  | 3  | 1 | 1  | 240,866,502 | 240,824,803 | 1q43   | 1q43     |
| LU3_L   | 3  | 1 | 1  | 241,191,967 | 241,233,157 | 1q43   | 1q43     |
| LU3_L   | 3  | 1 | 1  | 241,233,157 | 241,191,967 | 1q43   | 1q43     |
| LU16_L  | 5  | 2 | 14 | 241,322,019 | 106,323,172 | 2q37.3 | 14q32.33 |
| LU3_AD  | 5  | 2 | 14 | 241,328,291 | 106,324,020 | 2q37.3 | 14q32.33 |
| LU18_L  | 3  | 2 | 2  | 241,521,431 | 241,552,885 | 2q37.3 | 2q37.3   |
| LU18_L  | 3  | 2 | 2  | 241,552,885 | 241,521,431 | 2q37.3 | 2q37.3   |
| LU3_L   | 3  | 1 | 7  | 242,482,271 | 61,818,197  | 1q43   | 7q11.21  |
| LU16_L  | 3  | 1 | 16 | 242,482,656 | 33,040,450  | 1q43   | 16p11.2  |
| LU3_AD  | 3  | 1 | 6  | 242,621,779 | 49,470,742  | 1q43   | 6p12.3   |
| LU7_L   | 4  | 2 | 2  | 242,690,649 | 192,577,108 | 2q37.3 | 2q32.3   |
| LU6_L   | 3  | 2 | 4  | 243,152,897 | 119,596,773 | 2q37.3 | 4q26     |
| LU7_L   | 7  | 2 | 12 | 243,153,672 | 60,789,225  | 2q37.3 | 12q14.1  |
| LU4_AD  | 4  | 2 | 19 | 243,153,708 | 56,147,660  | 2q37.3 | 19q13.42 |
| LU6_AD  | 3  | 2 | 4  | 243,154,236 | 119,597,340 | 2q37.3 | 4q26     |
| LU14_AD | 3  | 1 | 25 | 247,134,720 | 829,024     | 1q44   | 25       |
| LU12_AD | 3  | 1 | 8  | 247,284,392 | 11,775,157  | 1q44   | 8p23.1   |
| LU5_AD  | 5  | 1 | 8  | 247,285,957 | 12,574,674  | 1q44   | 8p23.1   |
| LU4_AD  | 3  | 1 | 6  | 247,872,399 | 2,307,055   | 1q44   | 6p25.2   |
| LU7_L   | 4  | 1 | 12 | 248,061,847 | 68,934,022  | 1q44   | 12q15    |
| LU18_AD | 4  | 1 | 12 | 248,067,887 | 68,933,000  | 1q44   | 12q15    |
| LU4_AD  | 3  | 1 | 1  | 248,726,497 | 248,756,482 | 1q44   | 1q44     |

|        |   |   |   |             |             |      |         |
|--------|---|---|---|-------------|-------------|------|---------|
| LU4_AD | 3 | 1 | 1 | 248,756,482 | 248,726,497 | 1q44 | 1q44    |
| LU8_L  | 3 | 1 | 1 | 249,175,506 | 226,863,523 | 1q44 | 1q42.12 |



| Gene A   | Gene B    |
|----------|-----------|
| no_gene  | SH3GL2    |
| no_gene  | no_gene   |
| FAM126A  | TMEM9B    |
| LMX1B    | RET       |
| EPRS     | RAB3GAP2  |
| VGLL3    | no_gene   |
| VGLL3    | no_gene   |
| GABRA4   | TTC28     |
| GABRA4   | TTC28     |
| PARK2    | PACRG     |
| PARK2    | PACRG     |
| no_gene  | ELMO1     |
| no_gene  | SH3GL2    |
| PTPRD    | no_gene   |
| no_gene  | C10orf68  |
| MEIS2    | no_gene   |
| no_gene  | CHRNA7    |
| DOCK8    | no_gene   |
| DOCK8    | no_gene   |
| ZDHHC11  | SP4       |
| ZDHHC11  | SP4       |
| GNG13    | TSHZ2     |
| no_gene  | CDYL      |
| no_gene  | CDYL      |
| FLJ35024 | LOC284757 |
| KIAA0020 | no_gene   |
| KIAA0020 | no_gene   |
| no_gene  | no_gene   |
| no_gene  | no_gene   |
| SDK1     | no_gene   |
| SDK1     | no_gene   |
| ADCY2    | DNAH5     |
| no_gene  | SH3GL2    |
| PTPRD    | no_gene   |
| SEMA5A   | CDH10     |
| SEMA5A   | CDH10     |
| CTNND2   | no_gene   |
| CTNND2   | no_gene   |
| no_gene  | ELMO1     |
| MACROD2  | MACROD2   |
| MACROD2  | MACROD2   |

|           |          |
|-----------|----------|
| no_gene   | no_gene  |
| RSG1      | AMPD2    |
| RSG1      | AMPD2    |
| no_gene   | SH3GL2   |
| HDAC9     | PLCB1    |
| HDAC9     | PLCB1    |
| SP4       | DNAH11   |
| ZBTB40    | no_gene  |
| ZBTB40    | no_gene  |
| FAM126A   | TMEM9B   |
| no_gene   | no_gene  |
| no_gene   | no_gene  |
| no_gene   | C10orf68 |
| BRE       | SLC5A11  |
| BRE       | SLC5A11  |
| ALK       | EML4     |
| ALK       | EML4     |
| LCLAT1    | LCLAT1   |
| LCLAT1    | LCLAT1   |
| DPY19L2P1 | RPSAP52  |
| SCUBE3    | PARK2    |
| ELMO1     | no_gene  |
| ELMO1     | no_gene  |
| MEIS2     | no_gene  |
| RMDN2     | EML4     |
| CNTNAP3   | no_gene  |
| CNTNAP3   | no_gene  |
| SLC8A1    | SLC8A1   |
| SLC8A1    | SLC8A1   |
| C7orf10   | no_gene  |
| C7orf10   | no_gene  |
| EML4      | no_gene  |
| EML4      | no_gene  |
| EML4      | no_gene  |
| ST3GAL3   | ST3GAL3  |
| ST3GAL3   | ST3GAL3  |
| no_gene   | ELMO1    |
| no_gene   | ELMO1    |
| no_gene   | FAM19A2  |
| C12orf54  | SLC39A6  |
| CCNT1     | MYL6     |

|           |              |
|-----------|--------------|
| LIMA1     | MYL6         |
| LIMA1     | MYL6         |
| RAB3C     | ZSWIM6       |
| RAB3C     | ZSWIM6       |
| DAB1      | AHRR         |
| DAB1      | AHRR         |
| PDE4D     | no_gene      |
| FAM19A2   | XPOT         |
| FAM19A2   | XPOT         |
| FAM19A2   | MTERFD3      |
| FAM19A2   | LOC100507250 |
| FAM19A2   | LOC100507250 |
| SRGAP1    | ACSS3        |
| SRGAP1    | ACSS3        |
| no_gene   | ABL2         |
| no_gene   | ABL2         |
| SRSF11    | PXDNL        |
| no_gene   | IFT88        |
| ACSS3     | GPHN         |
| LPHN2     | SLC44A3      |
| USP10     | CRISPLD2     |
| USP10     | CRISPLD2     |
| no_gene   | SERPINA12    |
| no_gene   | SERPINA12    |
| WDR25     | WDR25        |
| WDR25     | WDR25        |
| DPY19L2P2 | RPSAP52      |
| IL18      | BCL2         |
| IL18      | BCL2         |
| no_gene   | no_gene      |
| LMX1B     | RET          |
| RNF145    | TENM2        |
| no_gene   | no_gene      |
| no_gene   | no_gene      |
| no_gene   | RABGAP1L     |
| no_gene   | RABGAP1L     |
| no_gene   | SFT2D1       |
| NME7      | CRB1         |
| NME7      | CRB1         |
| RABGAP1L  | no_gene      |
| RABGAP1L  | no_gene      |
| no_gene   | RBFOX1       |
| no_gene   | RBFOX1       |
| PLXNA2    | TTC28        |

| EPRS      | RAB3GAP2  |
|-----------|-----------|
| no_gene   | TRABD2B   |
| no_gene   | SLC9A3    |
| no_gene   | SLC9A3    |
| no_gene   | no_gene   |
| ZNF718    | no_gene   |
| no_gene   | no_gene   |
| no_gene   | CAMK2B    |
| no_gene   | SNORD93   |
| ZNF718    | ZNF99     |
| ROCK1P1   | PDE4DIP   |
| no_gene   | no_gene   |
| no_gene   | no_gene   |
| OR4F21    | FAM138E   |
| ZNF718    | ZNF519    |
| CBWD1     | no_gene   |
| no_gene   | TRABD2B   |
| CBWD1     | CBWD3     |
| no_gene   | no_gene   |
| no_gene   | ELMO1     |
| LOC653486 | TRABD2B   |
| LOC653486 | TRABD2B   |
| HBZ       | no_gene   |
| HBZ       | KCNIP1    |
| no_gene   | no_gene   |
| FAM20C    | no_gene   |
| IQSEC3    | no_gene   |
| no_gene   | no_gene   |
| no_gene   | TRABD2B   |
| no_gene   | 1-Mar     |
| FAM150B   | no_gene   |
| CHL1      | CHL1      |
| no_gene   | no_gene   |
| no_gene   | no_gene   |
| AHRR      | DAB1      |
| AHRR      | DAB1      |
| no_gene   | LOC442497 |
| no_gene   | no_gene   |
| CHL1      | CHL1      |
| LOC442497 | no_gene   |
| CHL1      | CHL1      |

|             |           |
|-------------|-----------|
| PP7080      | LINC00263 |
| PIGG        | PIGG      |
| SLC9A3      | no_gene   |
| SLC9A3      | no_gene   |
| MIR4456     | no_gene   |
| PIGG        | PIGG      |
| no_gene     | no_gene   |
| no_gene     | TPPP      |
| no_gene     | TPPP      |
| no_gene     | TPPP      |
| no_gene     | no_gene   |
| no_gene     | no_gene   |
| no_gene     | no_gene   |
| no_gene     | FAM20C    |
| no_gene     | no_gene   |
| no_gene     | no_gene   |
| no_gene     | no_gene   |
| no_gene     | TRIP13    |
| no_gene     | PTPRR     |
| no_gene     | PTPRR     |
| CEP72       | no_gene   |
| CEP72       | no_gene   |
| CEP72       | no_gene   |
| CEP72       | GOLGA6L1  |
| CEP72       | no_gene   |
| CEP72       | no_gene   |
| CEP72       | no_gene   |
| TPPP        | PTPRR     |
| TPPP        | PTPRR     |
| TPPP        | GRIP1     |
| TPPP        | GRIP1     |
| LOC10013333 | no_gene   |
| TPPP        | CNOT2     |
| DIP2C       | DIP2C     |

|         |           |
|---------|-----------|
| TPPP    | no_gene   |
| TPPP    | CLPTM1L   |
| TPPP    | PTPRR     |
| no_gene | no_gene   |
| no_gene | no_gene   |
| DIP2C   | DIP2C     |
| no_gene | SP4       |
| no_gene | no_gene   |
| no_gene | no_gene   |
| no_gene | BAHD1     |
| no_gene | no_gene   |
| no_gene | no_gene   |
| no_gene | CCT2      |
| no_gene | CCT2      |
| no_gene | MEIS2     |
| no_gene | no_gene   |
| no_gene | MEIS2     |
| no_gene | no_gene   |
| no_gene | PTPRR     |
| ZDHHC11 | PTPRR     |
| ZDHHC11 | no_gene   |
| FAM41C  | no_gene   |
| ZDHHC11 | no_gene   |
| GNG13   | no_gene   |
| ZDHHC11 | BRD9      |
| BRD9    | TRIP13    |
| no_gene | no_gene   |
| BRD9    | MEIS2     |
| BRD9    | LOC145845 |
| SAMD11  | NCAM1     |
| SAMD11  | NCAM1     |
| BRD9    | CCT2      |
| BRD9    | CCT2      |
| BRD9    | ZDHHC11   |
| TRIP13  | no_gene   |
| TRIP13  | no_gene   |
| no_gene | no_gene   |
| TRIP13  | BRD9      |

|             |           |
|-------------|-----------|
| TRIP13      | CTDSP2    |
| TRIP13      | CTDSP2    |
| TRIP13      | PTPRB     |
| TRIP13      | no_gene   |
| TRIP13      | PTPRB     |
| TRIP13      | no_gene   |
| no_gene     | no_gene   |
| TRIP13      | no_gene   |
| TRIP13      | no_gene   |
| LOC10050668 | no_gene   |
| LOC10050668 | no_gene   |
| NKD2        | no_gene   |
| no_gene     | no_gene   |
| NKD2        | PTPRR     |
| NKD2        | PTPRR     |
| no_gene     | no_gene   |
| SLC12A7     | PTPRB     |
| SLC12A7     | PTPRB     |
| SLC12A7     | YEATS4    |
| SLC12A7     | no_gene   |
| SLC12A7     | NBEAP1    |
| SLC12A7     | LOC728613 |
| SLC12A7     | LOC728613 |
| no_gene     | CPM       |
| no_gene     | no_gene   |
| no_gene     | MSRB3     |
| no_gene     | MSRB3     |
| no_gene     | no_gene   |
| no_gene     | no_gene   |
| no_gene     | PTPRR     |
| no_gene     | no_gene   |
| no_gene     | no_gene   |
| no_gene     | PTPRR     |
| no_gene     | no_gene   |
| no_gene     | no_gene   |
| no_gene     | TERT      |
| SLC6A19     | TERT      |
| SLC6A19     | no_gene   |

|            |             |
|------------|-------------|
| SLC6A19    | no_gene     |
| SLC6A19    | no_gene     |
| SLC6A19    | NA          |
| SLC6A19    | ANKRD20A12P |
| SLC6A19    | NA          |
| SLC6A19    | NA          |
| SLC6A19    | no_gene     |
| SLC6A19    | no_gene     |
| SLC6A18    | TERT        |
| no_gene    | no_gene     |
| TERT       | SLC6A19     |
| TERT       | SLC6A18     |
| TERT       | no_gene     |
| no_gene    | no_gene     |
| TERT       | no_gene     |
| TERT       | no_gene     |
| MIR4457    | no_gene     |
| MIR4457    | no_gene     |
| LINC00470  | no_gene     |
| CLPTM1L    | CYFIP1      |
| CLPTM1L    | CYFIP1      |
| CLPTM1L    | TPPP        |
| no_gene    | SLC6A3      |
| no_gene    | no_gene     |
| no_gene    | no_gene     |
| no_gene    | IRX4        |
| no_gene    | IRX4        |
| no_gene    | TFAMP1      |
| SLC6A3     | CNTNAP2     |
| no_gene    | no_gene     |
| SLC6A3     | no_gene     |
| SLC6A3     | no_gene     |
| no_gene    | LOC727677   |
| SLC6A3     | no_gene     |
| no_gene    | no_gene     |
| ADARB2     | ADARB2-AS1  |
| ADARB2-AS1 | ADARB2      |
| SDHAP3     | VPS8        |
| SDHAP3     | no_gene     |
| SDHAP3     | no_gene     |



|           |         |
|-----------|---------|
| SDHAP3    | no_gene |
| LOC728613 | SLC12A7 |
| LOC728613 | SLC12A7 |
| LOC728613 | PPP4R2  |
| LOC728613 | PPP4R2  |
| LOC728613 | no_gene |
| TFAMP1    | no_gene |
| no_gene   | MC3R    |
| CRAMP1L   | no_gene |
| no_gene   | no_gene |
| CRAMP1L   | no_gene |
| no_gene   | PTPRR   |
| no_gene   | no_gene |
| NDUFS6    | no_gene |
| NDUFS6    | no_gene |
| ADIPOR2   | C2orf61 |
| no_gene   | TMC2    |
| no_gene   | TMC2    |
| no_gene   | DOCK8   |
| no_gene   | DOCK8   |
| IRX4      | no_gene |
| IRX4      | no_gene |
| no_gene   | no_gene |
| no_gene   | no_gene |
| WHSC1     | SLC2A13 |
| no_gene   | NKD2    |
| no_gene   | NKD2    |
| no_gene   | no_gene |
| no_gene   | no_gene |
| no_gene   | no_gene |

|             |         |
|-------------|---------|
| PRKCZ       | NFAT5   |
| PRKCZ       | NFAT5   |
| no_gene     | SLC6A3  |
| no_gene     | SLC6A3  |
| no_gene     | no_gene |
| no_gene     | no_gene |
| MYT1L       | MYT1L   |
| no_gene     | no_gene |
| no_gene     | no_gene |
| GMDS        | GMDS    |
| no_gene     | no_gene |
| no_gene     | no_gene |
| no_gene     | no_gene |
| MYT1L       | MYT1L   |
| GMDS        | GMDS    |
| MAD1L1      | no_gene |
| no_gene     | NBEAP1  |
| no_gene     | SLC12A7 |
| no_gene     | NBEAP1  |
| MAD1L1      | SNX8    |
| MAD1L1      | no_gene |
| no_gene     | no_gene |
| CACNA1C     | CACNA1C |
| no_gene     | no_gene |
| no_gene     | no_gene |
| no_gene     | no_gene |
| CACNA1C     | CACNA1C |
| no_gene     | no_gene |
| no_gene     | no_gene |
| no_gene     | no_gene |
| SNX8        | MAD1L1  |
| LOC10050812 | OR6F1   |
| LOC10050812 | no_gene |
| C11orf21    | no_gene |
| no_gene     | no_gene |
| no_gene     | no_gene |
| no_gene     | KCNC2   |
| no_gene     | KCNC2   |
| no_gene     | CBWD1   |
| no_gene     | no_gene |
| no_gene     | no_gene |

|         |         |
|---------|---------|
| no_gene | no_gene |
| no_gene | FEM1B   |
| no_gene | FEM1B   |
| TMC2    | no_gene |
| TMC2    | no_gene |
| no_gene | CPM     |
| no_gene | CPM     |
| no_gene | GRIP1   |
| no_gene | GRIP1   |
| TMC2    | DPF3    |
| TMC2    | DPF3    |
| no_gene | no_gene |
| no_gene | no_gene |
| BRAT1   | no_gene |
| no_gene | no_gene |
| BRAT1   | no_gene |
| no_gene | no_gene |
| no_gene | no_gene |
| no_gene | no_gene |
| IQCE    | no_gene |
| IQCE    | no_gene |
| no_gene | CPM     |
| no_gene | CPM     |
| KCNQ1   | KCNQ1   |
| no_gene | no_gene |
| no_gene | MIR3648 |
| no_gene | no_gene |
| KCNQ1   | KCNQ1   |
| no_gene | no_gene |

|         |           |
|---------|-----------|
| no_gene | no_gene   |
| CNTN4   | CNTN4     |
| no_gene | no_gene   |
| AMZ1    | no_gene   |
| no_gene | no_gene   |
| CNTN4   | CNTN4     |
| no_gene | FRS2      |
| no_gene | FRS2      |
| no_gene | no_gene   |
| no_gene | SLC24A3   |
| no_gene | no_gene   |
| no_gene | no_gene   |
| no_gene | CNOT2     |
| no_gene | CNOT2     |
| no_gene | no_gene   |
| no_gene | XPOT      |
| no_gene | XPOT      |
| no_gene | GRIP1     |
| no_gene | LOC646278 |
| no_gene | NUP107    |
| no_gene | NUP107    |
| no_gene | no_gene   |
| ARSF    | no_gene   |
| CSMD1   | no_gene   |
| CSMD1   | RIMS2     |
| no_gene | no_gene   |
| no_gene | no_gene   |
| no_gene | no_gene   |
| no_gene | SCIN      |
| no_gene | no_gene   |
| CARD11  | LOC729852 |
| no_gene | NPSR1-AS1 |
| CSMD1   | no_gene   |
| no_gene | SDK1      |
| no_gene | no_gene   |
| no_gene | DACH2     |
| MRGPRE  | OR2AG2    |
| MRGPRE  | OR2AG2    |
| MRGPRE  | OR6A2     |
| MRGPRE  | OR6A2     |
| OR1F2P  | no_gene   |

|           |              |
|-----------|--------------|
| no_gene   | SDK1         |
| no_gene   | no_gene      |
| no_gene   | no_gene      |
| no_gene   | no_gene      |
| LOC650368 | no_gene      |
| no_gene   | WDR70        |
| no_gene   | WDR70        |
| RFX3      | RFX3         |
| RFX3      | RFX3         |
| no_gene   | no_gene      |
| SDK1      | RNF216       |
| no_gene   | no_gene      |
| no_gene   | no_gene      |
| SDK1      | no_gene      |
| no_gene   | no_gene      |
| SDK1      | LOC729852    |
| SDK1      | no_gene      |
| LOC389906 | no_gene      |
| EFCAB4B   | no_gene      |
| no_gene   | LOC389906    |
| no_gene   | no_gene      |
| no_gene   | no_gene      |
| no_gene   | no_gene      |
| no_gene   | LOC650368    |
| CSMD1     | HOXA3        |
| CSMD1     | HOXA3        |
| CSMD1     | 11-Mar       |
| CSMD1     | 11-Mar       |
| no_gene   | no_gene      |
| C6orf201  | no_gene      |
| no_gene   | C6orf201     |
| no_gene   | no_gene      |
| no_gene   | CABIN1       |
| no_gene   | CABIN1       |
| no_gene   | LOC100506082 |
| no_gene   | MIR4457      |
| no_gene   | MIR4457      |

|             |         |
|-------------|---------|
| LOC10050608 | no_gene |
| no_gene     | no_gene |
| no_gene     | no_gene |
| ZBTB49      | no_gene |
| no_gene     | no_gene |
| OR52K1      | CDH18   |
| OR52K1      | CDH18   |
| no_gene     | NA      |
| no_gene     | PDE4DIP |
| no_gene     | NBPF9   |
| no_gene     | PDE4DIP |
| no_gene     | NBPF9   |
| no_gene     | NA      |
| no_gene     | no_gene |
| no_gene     | PDE4DIP |
| no_gene     | PDE4DIP |
| no_gene     | PDE4DIP |
| no_gene     | NBPF9   |
| no_gene     | no_gene |
| no_gene     | 7-Sep   |
| no_gene     | no_gene |
| ITPR1       | ITPR1   |
| no_gene     | NDUFS4  |
| FOXK1       | RASSF3  |
| FOXK1       | RASSF3  |
| no_gene     | no_gene |
| ITPR1       | ITPR1   |
| no_gene     | PTPRR   |
| no_gene     | SRGAP1  |

|          |              |
|----------|--------------|
| CDYL     | CDYL         |
| CDYL     | CDYL         |
| ITPR1    | ITPR1        |
| SLC23A2  | CDS2         |
| SLC23A2  | CDS2         |
| ITPR1    | ITPR1        |
| SLC23A2  | NA           |
| SLC23A2  | NA           |
| CDYL     | no_gene      |
| CDYL     | no_gene      |
| no_gene  | LOC100506688 |
| no_gene  | LOC100506688 |
| no_gene  | no_gene      |
| no_gene  | no_gene      |
| no_gene  | no_gene      |
| no_gene  | NA           |
| no_gene  | no_gene      |
| no_gene  | FAM126B      |
| MMD2     | no_gene      |
| no_gene  | no_gene      |
| no_gene  | no_gene      |
| MMD2     | no_gene      |
| no_gene  | GRIP1        |
| no_gene  | GRIP1        |
| MMP26    | no_gene      |
| no_gene  | MMP26        |
| no_gene  | no_gene      |
| AKR1C3   | no_gene      |
| JAK2     | no_gene      |
| no_gene  | no_gene      |
| AKR1C3   | no_gene      |
| AKR1C3   | no_gene      |
| CDS2     | SLC23A2      |
| CDS2     | SLC23A2      |
| no_gene  | no_gene      |
| no_gene  | MMD2         |
| KDM4B    | no_gene      |
| no_gene  | GNG13        |
| no_gene  | no_gene      |
| ADAMTS16 | no_gene      |
| ADAMTS16 | no_gene      |
| ADAMTS16 | no_gene      |
| C18orf42 | no_gene      |
| no_gene  | LOC100506990 |

|          |           |
|----------|-----------|
| no_gene  | TOX       |
| no_gene  | no_gene   |
| no_gene  | no_gene   |
| no_gene  | no_gene   |
| ADAMTS16 | no_gene   |
| ADAMTS16 | no_gene   |
| no_gene  | no_gene   |
| no_gene  | C18orf42  |
| no_gene  | EPB41L3   |
| no_gene  | no_gene   |
| no_gene  | no_gene   |
| RABEP1   | NF1       |
| no_gene  | no_gene   |
| PROKR2   | PDE10A    |
| no_gene  | LINC00470 |
| no_gene  | ALG3      |
| no_gene  | PLCB4     |
| no_gene  | PLCB4     |
| EPB41L3  | no_gene   |
| KIAA0947 | KIAA0947  |
| KIAA0947 | KIAA0947  |
| no_gene  | no_gene   |
| OR52B6   | no_gene   |
| no_gene  | no_gene   |
| ANO2     | ANO2      |
| ANO2     | ANO2      |
| RNF216   | no_gene   |
| RNF216   | SDK1      |
| NRTN     | RC3H2     |
| OR52E4   | no_gene   |
| OR52E4   | no_gene   |
| no_gene  | OR10A4    |
| NLGN4X   | NLGN4Y    |
| CCZ1     | NXPH1     |
| no_gene  | PKM       |
| no_gene  | FAM86B3P  |
| L3MBTL4  | L3MBTL4   |
| OR56A5   | no_gene   |
| OR56A5   | PLEKHA7   |



|          |           |
|----------|-----------|
| OR56A5   | PLEKHA7   |
| WSCD1    | WSCD1     |
| L3MBTL4  | L3MBTL4   |
| NLGN4X   | NLGN4Y    |
| WSCD1    | WSCD1     |
| no_gene  | no_gene   |
| EIF2AK1  | PKD1L1    |
| EIF2AK1  | PKD1L1    |
| no_gene  | RPAP2     |
| no_gene  | DOCK5     |
| no_gene  | DOCK5     |
| no_gene  | no_gene   |
| TSPY2    | no_gene   |
| no_gene  | no_gene   |
| no_gene  | no_gene   |
| no_gene  | TSPY2     |
| no_gene  | no_gene   |
| no_gene  | no_gene   |
| no_gene  | no_gene   |
| F13A1    | F13A1     |
| RPL22    | LOC729970 |
| F13A1    | F13A1     |
| no_gene  | no_gene   |
| no_gene  | NA        |
| no_gene  | no_gene   |
| FLJ33360 | NA        |
| FLJ33360 | no_gene   |
| no_gene  | no_gene   |
| no_gene  | no_gene   |
| TRIM3    | no_gene   |
| UBE2QL1  | CT49      |
| TIMM10B  | no_gene   |
| TIMM10B  | no_gene   |
| no_gene  | LINC00299 |
| DCHS1    | DISP2     |
| GVINP1   | no_gene   |
| GVINP1   | no_gene   |
| ALOX12P2 | no_gene   |
| OR2AG2   | no_gene   |
| OR2AG2   | no_gene   |
| OR2AG2   | MRGPRES   |
| OR2AG2   | MRGPRES   |
| OR6A2    | MRGPRES   |
| OR6A2    | MRGPRES   |

|              |              |
|--------------|--------------|
| no_gene      | OR56A5       |
| no_gene      | GTF2H1       |
| CCZ1B        | NXPH1        |
| CCZ1B        | NXPH1        |
| CCZ1B        | MAGI2-AS3    |
| no_gene      | no_gene      |
| LINC00487    | no_gene      |
| OR10A4       | no_gene      |
| no_gene      | CT60         |
| no_gene      | TBC1D15      |
| no_gene      | LINC00487    |
| no_gene      | no_gene      |
| no_gene      | TBC1D15      |
| no_gene      | no_gene      |
| no_gene      | BLK          |
| RBFOX1       | no_gene      |
| RBFOX1       | no_gene      |
| C1GALT1      | C1GALT1      |
| no_gene      | no_gene      |
| C1GALT1      | C1GALT1      |
| no_gene      | no_gene      |
| no_gene      | no_gene      |
| GRM7         | GRM7         |
| DEFB107B     | no_gene      |
| RBFOX1       | RBFOX1       |
| no_gene      | no_gene      |
| GRM7         | GRM7         |
| RBFOX1       | RBFOX1       |
| no_gene      | no_gene      |
| no_gene      | no_gene      |
| no_gene      | no_gene      |
| ADCY2        | CT49         |
| no_gene      | no_gene      |
| RBFOX1       | RBFOX1       |
| RBFOX1       | RBFOX1       |
| LOC729852    | LOC729852    |
| LOC729852    | SDK1         |
| LOC729852    | CARD11       |
| LOC729852    | LOC729852    |
| no_gene      | no_gene      |
| BLOC1S5-TXN1 | no_gene      |
| no_gene      | LOC100506990 |
| no_gene      | no_gene      |
| no_gene      | no_gene      |

|           |           |
|-----------|-----------|
| FAM86B3P  | no_gene   |
| GLCCI1    | no_gene   |
| GLCCI1    | no_gene   |
| no_gene   | no_gene   |
| no_gene   | TIMM10B   |
| no_gene   | TIMM10B   |
| no_gene   | no_gene   |
| no_gene   | ELMO1     |
| LINC00299 | no_gene   |
| PTPRM     | no_gene   |
| PTPRD     | no_gene   |
| PTPRD     | no_gene   |
| no_gene   | PTPRM     |
| no_gene   | TTY2B     |
| CLDN23    | TNFRSF10B |
| no_gene   | no_gene   |
| no_gene   | no_gene   |
| NXPH1     | NXPH1     |
| TMEM114   | no_gene   |
| NXPH1     | NXPH1     |
| TTY11     | PLA2G4A   |
| no_gene   | TMEM114   |
| no_gene   | no_gene   |
| no_gene   | no_gene   |
| no_gene   | no_gene   |
| NXPH1     | CCZ1      |
| NXPH1     | CCZ1B     |
| NXPH1     | CCZ1B     |
| no_gene   | no_gene   |
| no_gene   | MIR5692A1 |
| PLCB1     | HDAC9     |
| PLCB1     | HDAC9     |
| ST5       | SP4       |
| RIMKLB    | no_gene   |
| no_gene   | no_gene   |
| no_gene   | ANK1      |
| no_gene   | no_gene   |
| TMEM9B    | FAM126A   |
| no_gene   | no_gene   |
| USP7      | no_gene   |
| no_gene   | no_gene   |

|         |         |
|---------|---------|
| no_gene | no_gene |
| SRGAP3  | SRGAP3  |
| MBOAT2  | no_gene |
| SRGAP3  | SRGAP3  |
| no_gene | no_gene |
| no_gene | CPA4    |
| RBM1A3P | RBM1A3P |
| RBM1A3P | no_gene |
| DENND5A | DLC1    |
| DENND5A | DLC1    |
| no_gene | INTS10  |
| no_gene | HTRA4   |
| no_gene | no_gene |
| H6PD    | SPSB1   |
| H6PD    | SPSB1   |
| SEMA5A  | no_gene |
| SEMA5A  | no_gene |
| no_gene | no_gene |
| PLCB4   | no_gene |
| PLCB4   | no_gene |
| no_gene | no_gene |
| SPSB1   | H6PD    |
| SPSB1   | H6PD    |
| no_gene | no_gene |
| no_gene | no_gene |
| DEFB131 | no_gene |
| no_gene | no_gene |
| no_gene | no_gene |
| no_gene | no_gene |
| TBL1X   | TBL1X   |
| LAMP5   | no_gene |
| no_gene | no_gene |
| PAK7    | no_gene |
| no_gene | no_gene |
| no_gene | no_gene |
| no_gene | LEP     |
| TBL1X   | TBL1X   |
| TTY2B   | no_gene |
| no_gene | no_gene |
| no_gene | TRIM3   |
| no_gene | no_gene |
| no_gene | FMO9P   |
| no_gene | no_gene |
| no_gene | no_gene |
| no_gene | no_gene |

|           |           |
|-----------|-----------|
| LOC284385 | no_gene   |
| no_gene   | SCN8A     |
| no_gene   | no_gene   |
| MIR3648   | LINC00648 |
| MIR3648   | no_gene   |
| no_gene   | no_gene   |
| no_gene   | no_gene   |
| no_gene   | RBMY1A3P  |
| no_gene   | TPH1      |
| no_gene   | TPH1      |
| TEKT4P2   | no_gene   |
| no_gene   | no_gene   |
| TAF1B     | no_gene   |
| GRIN2A    | GRIN2A    |
| no_gene   | no_gene   |
| GRIN2A    | GRIN2A    |
| GRIN2A    | GRIN2A    |
| no_gene   | no_gene   |
| no_gene   | no_gene   |
| no_gene   | BANK1     |
| GRIN2A    | GRIN2A    |
| no_gene   | no_gene   |
| CMBL      | MTUS1     |
| CMBL      | MTUS1     |
| no_gene   | SPATA6    |
| no_gene   | MKKS      |
| MKKS      | no_gene   |
| no_gene   | no_gene   |
| no_gene   | no_gene   |
| no_gene   | LURAP1L   |
| no_gene   | no_gene   |
| ATP2B2    | ATP2B2    |
| ATP2B2    | ATP2B2    |
| no_gene   | no_gene   |
| RNF141    | no_gene   |
| RNF141    | SERGEF    |
| RNF141    | SERGEF    |
| no_gene   | KCNC2     |
| no_gene   | no_gene   |

|          |         |
|----------|---------|
| no_gene  | no_gene |
| no_gene  | no_gene |
| no_gene  | no_gene |
| ANKRD33B | no_gene |
| no_gene  | no_gene |
| no_gene  | XKR6    |
| XKR6     | no_gene |
| no_gene  | no_gene |
| no_gene  | no_gene |
| TEKT5    | no_gene |
| no_gene  | NOMO2   |
| no_gene  | no_gene |
| no_gene  | no_gene |
| NDUFA4   | DACH2   |
| CTNND2   | no_gene |
| no_gene  | no_gene |
| no_gene  | no_gene |
| CTNND2   | NA      |
| CTNND2   | NA      |
| SHISA6   | no_gene |
| SHISA6   | no_gene |
| CTNND2   | CT60    |
| CTNND2   | CT60    |
| no_gene  | no_gene |
| no_gene  | ZDHHC11 |
| no_gene  | no_gene |
| CTNND2   | no_gene |
| no_gene  | no_gene |
| no_gene  | no_gene |
| BLK      | no_gene |
| BLK      | no_gene |
| no_gene  | PHF20   |
| no_gene  | SRC     |
| THSD7A   | THSD7A  |
| GALNT18  | GALNT18 |
| THSD7A   | THSD7A  |
| GALNT18  | GALNT18 |
| no_gene  | no_gene |
| no_gene  | no_gene |
| ZNF627   | PPP2R1A |
| ADTRP    | ADTRP   |
| no_gene  | UBR1    |
| ADTRP    | ADTRP   |
| no_gene  | ZNF124  |

|             |           |
|-------------|-----------|
| TXNDC11     | no_gene   |
| no_gene     | no_gene   |
| FAM66D      | FAM86HP   |
| USP17L2     | FAM86B1   |
| no_gene     | no_gene   |
| FAM86B1     | USP17L2   |
| SYN2        | SYN2      |
| no_gene     | no_gene   |
| no_gene     | no_gene   |
| SYN2        | SYN2      |
| no_gene     | no_gene   |
| no_gene     | NPSR1-AS1 |
| no_gene     | KGFLP1    |
| no_gene     | no_gene   |
| LOC10050699 | no_gene   |
| LOC10050699 | MTMR7     |
| no_gene     | no_gene   |
| LOC10050699 | no_gene   |
| no_gene     | no_gene   |
| VPS13D      | RBL1      |
| LOC729732   | NA        |
| no_gene     | no_gene   |
| no_gene     | TEKT5     |
| no_gene     | HERPUD2   |
| LONRF1      | ZNF124    |
| LONRF1      | no_gene   |
| no_gene     | no_gene   |
| no_gene     | SCIN      |
| SCIN        | no_gene   |
| CT49        | ADCY2     |
| CT49        | no_gene   |
| SCIN        | no_gene   |
| no_gene     | no_gene   |
| no_gene     | no_gene   |
| CT49        | no_gene   |
| CT49        | UBE2QL1   |
| SCIN        | no_gene   |
| SCIN        | no_gene   |

|          |           |
|----------|-----------|
| SCIN     | no_gene   |
| no_gene  | no_gene   |
| no_gene  | no_gene   |
| no_gene  | no_gene   |
| TEAD1    | TEAD1     |
| LURAP1L  | no_gene   |
| TEAD1    | TEAD1     |
| PRAMEF12 | CD48      |
| no_gene  | no_gene   |
| no_gene  | LOC642929 |
| DLC1     | DENND5A   |
| DLC1     | DENND5A   |
| no_gene  | no_gene   |
| no_gene  | no_gene   |
| DLC1     | PLEKHA7   |
| no_gene  | ANKRD20A1 |
| no_gene  | no_gene   |
| PRAMEF9  | no_gene   |
| BTBD10   | no_gene   |
| no_gene  | no_gene   |
| no_gene  | no_gene   |
| no_gene  | no_gene   |
| LDLRAD4  | LDLRAD4   |
| LDLRAD4  | LDLRAD4   |
| no_gene  | NA        |
| SIRT5    | no_gene   |
| no_gene  | MEIS2     |
| DNAH5    | ADCY2     |
| SEL1L2   | no_gene   |
| no_gene  | CT49      |
| no_gene  | no_gene   |
| no_gene  | no_gene   |



|           |           |
|-----------|-----------|
| SGCZ      | PCM1      |
| COX10     | CAST      |
| ZNF519    | ZNF718    |
| MACROD2   | no_gene   |
| CDRT15    | CDRT15L2  |
| no_gene   | no_gene   |
| no_gene   | RNU6-76   |
| no_gene   | no_gene   |
| LSM3      | no_gene   |
| no_gene   | LSM3      |
| SGCZ      | no_gene   |
| no_gene   | TERF1     |
| no_gene   | EFCAB4B   |
| no_gene   | no_gene   |
| CXADRP3   | CXADR     |
| no_gene   | no_gene   |
| no_gene   | SCN3A     |
| SGCZ      | no_gene   |
| ATF7IP    | no_gene   |
| ANKH      | no_gene   |
| ANKH      | no_gene   |
| DGKB      | no_gene   |
| no_gene   | no_gene   |
| PDE3B     | PPM1F     |
| no_gene   | no_gene   |
| no_gene   | OR52B6    |
| ABCC6P2   | no_gene   |
| no_gene   | no_gene   |
| no_gene   | no_gene   |
| LOC441009 | CPEB2     |
| POTED     | POTEG     |
| MIR3180-1 | PDXDC2P   |
| MACROD2   | MACROD2   |
| MACROD2   | MACROD2   |
| MIR3180-1 | PDXDC2P   |
| CPEB2     | LOC441009 |
| no_gene   | no_gene   |
| SGCZ      | ADAM18    |
| no_gene   | DGKB      |
| KAZN      | KAZN      |
| KAZN      | KAZN      |

|              |               |
|--------------|---------------|
| no_gene      | no_gene       |
| no_gene      | DTNB          |
| TVP23C-CDRT4 | TVP23C-CDRT4  |
| TVP23C-CDRT4 | TVP23C-CDRT4  |
| no_gene      | no_gene       |
| no_gene      | no_gene       |
| no_gene      | SP4           |
| no_gene      | OR2AG2        |
| no_gene      | OR2AG2        |
| no_gene      | no_gene       |
| FBXL7        | no_gene       |
| MEIS3P1      | IL6ST         |
| no_gene      | no_gene       |
| no_gene      | NDUFS6        |
| no_gene      | no_gene       |
| CYP4F3       | no_gene       |
| no_gene      | no_gene       |
| no_gene      | no_gene       |
| MACROD2      | MACROD2       |
| MACROD2      | MACROD2       |
| FBXL7        | CT60          |
| no_gene      | no_gene       |
| no_gene      | no_gene       |
| FBXL7        | no_gene       |
| MACROD2      | no_gene       |
| no_gene      | FBXL7         |
| CYP4F2       | no_gene       |
| no_gene      | no_gene       |
| no_gene      | TNN           |
| no_gene      | no_gene       |
| no_gene      | IQCE          |
| no_gene      | no_gene       |
| no_gene      | no_gene       |
| no_gene      | CYP4F2        |
| no_gene      | CYP4F3        |
| no_gene      | no_gene       |
| SOX6         | SOX6          |
| no_gene      | POLR2C        |
| no_gene      | no_gene       |
| SOX6         | SOX6          |
| 11-Mar       | C1QTNF3-AMACR |

|         |           |
|---------|-----------|
| 11-Mar  | no_gene   |
| 11-Mar  | no_gene   |
| 11-Mar  | CSMD1     |
| 11-Mar  | CSMD1     |
| no_gene | VPS37A    |
| no_gene | no_gene   |
| no_gene | no_gene   |
| no_gene | no_gene   |
| C9orf92 | C9orf92   |
| no_gene | no_gene   |
| no_gene | no_gene   |
| C9orf92 | C9orf92   |
| no_gene | SMU1      |
| ISPD    | PLEKHA7   |
| no_gene | CNBD1     |
| POTEH   | POTEM     |
| POTEH   | POTEM     |
| ABCC6   | no_gene   |
| no_gene | NAV2      |
| no_gene | NAV2      |
| RFTN1   | RFTN1     |
| ISPD    | no_gene   |
| ISPD    | no_gene   |
| ATXN1   | FBXO9     |
| no_gene | RAI14     |
| no_gene | no_gene   |
| no_gene | no_gene   |
| RFTN1   | RFTN1     |
| FAM134B | no_gene   |
| FAM134B | no_gene   |
| FAM134B | FAM134B   |
| RFTN1   | RFTN1     |
| no_gene | no_gene   |
| no_gene | no_gene   |
| no_gene | no_gene   |
| FAM134B | FAM134B   |
| RFTN1   | RFTN1     |
| RSG1    | no_gene   |
| FBXO42  | GNAI3     |
| FBXO42  | GNAI3     |
| no_gene | CHRN3     |
| no_gene | no_gene   |
| ANKMY2  | NPSR1-AS1 |
| no_gene | EFHA2     |

|         |              |
|---------|--------------|
| no_gene | no_gene      |
| no_gene | no_gene      |
| NLGN4Y  | NLGN4X       |
| no_gene | no_gene      |
| no_gene | NA           |
| PLEKHA7 | no_gene      |
| PLEKHA7 | no_gene      |
| no_gene | no_gene      |
| no_gene | no_gene      |
| NLGN4Y  | NLGN4X       |
| PLEKHA7 | KCNMB4       |
| PLEKHA7 | KCNMB4       |
| no_gene | no_gene      |
| AGR3    | no_gene      |
| EFHA2   | no_gene      |
| AGR3    | no_gene      |
| AGR3    | MGAT4C       |
| no_gene | no_gene      |
| NBPF1   | no_gene      |
| no_gene | no_gene      |
| NBPF1   | RNF123       |
| no_gene | SIRT5        |
| no_gene | NBPF1        |
| no_gene | no_gene      |
| no_gene | no_gene      |
| PLEKHA7 | DLC1         |
| PLEKHA7 | ISPD         |
| PLEKHA7 | OR56A5       |
| PLEKHA7 | OR56A5       |
| ESPNP   | CELSR2       |
| no_gene | CELSR2       |
| CUBN    | no_gene      |
| no_gene | FLJ39739     |
| no_gene | MACROD2      |
| VPS37A  | no_gene      |
| no_gene | HDAC9        |
| MTMR7   | LOC100506990 |
| XYLT1   | XYLT1        |
| no_gene | FAM182B      |
| no_gene | FAM182B      |
| XYLT1   | XYLT1        |
| PCSK2   | PCSK2        |
| PCSK2   | PCSK2        |
| PCSK2   | PCSK2        |

|           |           |
|-----------|-----------|
| PCSK2     | PCSK2     |
| no_gene   | FERD3L    |
| no_gene   | no_gene   |
| PCSK2     | no_gene   |
| no_gene   | no_gene   |
| TBC1D5    | TBC1D5    |
| no_gene   | no_gene   |
| TBC1D5    | TBC1D5    |
| no_gene   | no_gene   |
| FAM8A1    | HLA-DRB6  |
| FAM8A1    | HLA-DRB6  |
| MTUS1     | CMBL      |
| MTUS1     | CMBL      |
| SH3GL2    | no_gene   |
| SH3GL2    | no_gene   |
| SH3GL2    | no_gene   |
| no_gene   | NELL1     |
| no_gene   | NELL1     |
| no_gene   | NELL1     |
| MTUS1     | no_gene   |
| no_gene   | no_gene   |
| no_gene   | no_gene   |
| no_gene   | no_gene   |
| PCM1      | SGCZ      |
| no_gene   | no_gene   |
| no_gene   | no_gene   |
| SERGEF    | RNF141    |
| SERGEF    | RNF141    |
| SERGEF    | DNAH11    |
| SERGEF    | DNAH11    |
| SERGEF    | no_gene   |
| SERGEF    | no_gene   |
| no_gene   | LOC339862 |
| no_gene   | no_gene   |
| LOC339862 | no_gene   |
| TPH1      | no_gene   |
| TPH1      | no_gene   |
| no_gene   | no_gene   |
| no_gene   | DNAH11    |
| no_gene   | no_gene   |
| no_gene   | OR52E4    |
| no_gene   | OR52E4    |
| no_gene   | SGCZ      |
| no_gene   | CDH12     |

|           |         |
|-----------|---------|
| LOC494141 | no_gene |
| no_gene   | no_gene |
| no_gene   | LDHA    |
| no_gene   | no_gene |
| EVPLL     | no_gene |
| HDAC9     | no_gene |
| no_gene   | no_gene |
| HDAC9     | HDAC9   |
| HDAC9     | HDAC9   |
| GTF2H1    | no_gene |
| LDHA      | no_gene |
| no_gene   | no_gene |
| HDAC9     | HDAC9   |
| no_gene   | no_gene |
| no_gene   | no_gene |
| NOMO2     | no_gene |
| NOMO2     | no_gene |
| PIK3C2G   | TPH2    |
| ABCC6P1   | no_gene |
| no_gene   | no_gene |
| HDAC9     | HDAC9   |
| ABCC6P1   | no_gene |
| no_gene   | ZMAT4   |
| no_gene   | CHRNA3  |
| no_gene   | no_gene |
| no_gene   | RIMS1   |
| no_gene   | RIMS1   |
| PRODH     | SGCD    |
| CXADR     | CXADRP3 |
| HDAC9     | HDAC9   |
| no_gene   | no_gene |
| no_gene   | no_gene |

|            |           |
|------------|-----------|
| no_gene    | no_gene   |
| HDAC9      | HDAC9     |
| no_gene    | ATRX      |
| no_gene    | GLMN      |
| TWIST1     | C7orf10   |
| no_gene    | no_gene   |
| no_gene    | no_gene   |
| no_gene    | no_gene   |
| FERD3L     | no_gene   |
| no_gene    | no_gene   |
| no_gene    | no_gene   |
| no_gene    | SCIN      |
| no_gene    | no_gene   |
| no_gene    | SCIN      |
| SYT17      | C16orf62  |
| no_gene    | no_gene   |
| no_gene    | PDZD2     |
| no_gene    | LUZP2     |
| no_gene    | no_gene   |
| CSGALNACT1 | TENM4     |
| CSGALNACT1 | TENM4     |
| no_gene    | ASB18     |
| PLEKHA5    | ANO6      |
| no_gene    | no_gene   |
| no_gene    | ARSF      |
| no_gene    | no_gene   |
| OR11H12    | no_gene   |
| no_gene    | SGCZ      |
| no_gene    | ARHGAP42  |
| no_gene    | ARHGAP42  |
| no_gene    | SLC35F4   |
| no_gene    | no_gene   |
| no_gene    | MAP1LC3B2 |
| no_gene    | NF1P2     |
| no_gene    | no_gene   |
| no_gene    | no_gene   |
| no_gene    | MYO18B    |
| no_gene    | no_gene   |
| POTEG      | POTED     |
| C16orf62   | SYT17     |
| no_gene    | no_gene   |

|           |              |
|-----------|--------------|
| no_gene   | no_gene      |
| NAV2      | LOC100507377 |
| NAV2      | LOC100507377 |
| FAM41AY2  | no_gene      |
| no_gene   | no_gene      |
| no_gene   | no_gene      |
| NAV2      | no_gene      |
| NAV2      | no_gene      |
| no_gene   | ATPBD4-AS1   |
| no_gene   | no_gene      |
| NAV2      | NAV2         |
| no_gene   | no_gene      |
| SLC24A3   | no_gene      |
| no_gene   | no_gene      |
| NAV2      | NAV2         |
| INTS10    | no_gene      |
| CDH18     | no_gene      |
| CDH18     | BANK1        |
| no_gene   | NA           |
| no_gene   | OR11H12      |
| no_gene   | no_gene      |
| no_gene   | no_gene      |
| no_gene   | NBEAP1       |
| no_gene   | NBEAP1       |
| ANKRD26P3 | ANKRD26P3    |
| CDH18     | OR52K1       |
| CDH18     | OR52K1       |
| ANKRD26P3 | ANKRD26P3    |
| no_gene   | no_gene      |
| no_gene   | AMIGO2       |
| no_gene   | MTUS1        |
| TXNRD2    | no_gene      |
| no_gene   | no_gene      |
| POTEM     | POTEH        |
| POTEM     | POTEH        |
| no_gene   | TPPP         |
| no_gene   | TPPP         |
| no_gene   | no_gene      |
| no_gene   | PPM1H        |
| no_gene   | PPM1H        |
| no_gene   | no_gene      |
| SLC18A1   | no_gene      |
| no_gene   | no_gene      |
| no_gene   | no_gene      |



|          |           |
|----------|-----------|
| no_gene  | no_gene   |
| ZNF93    | no_gene   |
| no_gene  | no_gene   |
| no_gene  | no_gene   |
| no_gene  | OTOGL     |
| no_gene  | no_gene   |
| no_gene  | no_gene   |
| no_gene  | no_gene   |
| WDR35    | no_gene   |
| WDR35    | IGSF23    |
| PLXDC2   | PLXDC2    |
| no_gene  | no_gene   |
| no_gene  | no_gene   |
| PLXDC2   | PLXDC2    |
| no_gene  | no_gene   |
| no_gene  | no_gene   |
| no_gene  | no_gene   |
| ZNF90    | no_gene   |
| no_gene  | no_gene   |
| no_gene  | INHBA-AS1 |
| no_gene  | no_gene   |
| PLXDC2   | PLXDC2    |
| no_gene  | no_gene   |
| PLXDC2   | PLXDC2    |
| no_gene  | FAM221A   |
| no_gene  | no_gene   |
| no_gene  | no_gene   |
| no_gene  | SLC6A3    |
| no_gene  | SLC6A3    |
| no_gene  | no_gene   |
| no_gene  | no_gene   |
| no_gene  | no_gene   |
| no_gene  | C12orf71  |
| no_gene  | no_gene   |
| CDRT15L2 | CDRT15    |
| no_gene  | no_gene   |
| no_gene  | TPPP      |
| no_gene  | no_gene   |
| no_gene  | no_gene   |

|         |           |
|---------|-----------|
| no_gene | VWA5B1    |
| no_gene | no_gene   |
| no_gene | no_gene   |
| ZMYM2   | no_gene   |
| no_gene | no_gene   |
| PDE3A   | no_gene   |
| no_gene | no_gene   |
| VWA5B1  | no_gene   |
| ACSM1   | ZPBP      |
| PDE3A   | LINC00265 |
| no_gene | no_gene   |
| PDE3A   | PDE3A     |
| no_gene | no_gene   |
| no_gene | no_gene   |
| CDKAL1  | CDKAL1    |
| no_gene | no_gene   |
| no_gene | no_gene   |
| PDE3A   | PDE3A     |
| CDKAL1  | CDKAL1    |
| no_gene | no_gene   |
| ZNF626  | no_gene   |
| no_gene | DNAH11    |
| TEP1    | TEP1      |
| no_gene | no_gene   |
| no_gene | SHISA6    |
| no_gene | SHISA6    |
| no_gene | no_gene   |
| SLCO1C1 | no_gene   |
| TEP1    | TEP1      |
| NBEAP1  | no_gene   |
| NBEAP1  | SLC12A7   |
| NBEAP1  | no_gene   |
| NBEAP1  | no_gene   |
| NBEAP1  | no_gene   |
| TMEM241 | no_gene   |
| NELL1   | no_gene   |
| NELL1   | no_gene   |

|         |           |
|---------|-----------|
| no_gene | no_gene   |
| no_gene | ZNF626    |
| no_gene | no_gene   |
| no_gene | ZNF93     |
| NELL1   | no_gene   |
| NELL1   | no_gene   |
| NELL1   | no_gene   |
| no_gene | no_gene   |
| no_gene | SAMHD1    |
| no_gene | no_gene   |
| no_gene | no_gene   |
| no_gene | CYCS      |
| no_gene | CYCS      |
| NF1P2   | no_gene   |
| ZNF85   | ZNF681    |
| CT60    | FBXL7     |
| CT60    | CTNND2    |
| CT60    | CTNND2    |
| NELL1   | NELL1     |
| MAP2K3  | no_gene   |
| CT60    | no_gene   |
| NELL1   | NELL1     |
| CT60    | no_gene   |
| CT60    | no_gene   |
| no_gene | no_gene   |
| no_gene | no_gene   |
| IFT88   | no_gene   |
| IL17D   | no_gene   |
| IL17D   | no_gene   |
| no_gene | no_gene   |
| no_gene | no_gene   |
| KCNJ12  | no_gene   |
| SLCO1B1 | SLCO1B1   |
| no_gene | no_gene   |
| no_gene | IGF2BP3   |
| no_gene | IGF2BP3   |
| no_gene | KCNJ12    |
| SLCO1B1 | SLCO1B1   |
| no_gene | LOC401074 |
| SP4     | ST5       |
| SP4     | ZDHHC11   |
| SP4     | no_gene   |
| SP4     | ZDHHC11   |
| SP4     | no_gene   |

|           |           |
|-----------|-----------|
| GUSBP1    | no_gene   |
| SLCO1A2   | CCDC91    |
| SP4       | DNAH11    |
| no_gene   | no_gene   |
| GUSBP1    | no_gene   |
| DNAH11    | SP4       |
| DNAH11    | SP4       |
| DNAH11    | LCA5      |
| ZNF493    | no_gene   |
| ZNF493    | no_gene   |
| DNAH11    | SERGEF    |
| ZNF493    | ZNF98     |
| DNAH11    | SERGEF    |
| DNAH11    | no_gene   |
| METTL9    | no_gene   |
| METTL9    | no_gene   |
| no_gene   | no_gene   |
| no_gene   | no_gene   |
| NBPF3     | no_gene   |
| NBPF3     | NOTCH2    |
| NBPF3     | NOTCH2    |
| ZNF385D   | RBMS3     |
| no_gene   | no_gene   |
| CDH12     | NA        |
| DNAH11    | no_gene   |
| DNAH11    | no_gene   |
| no_gene   | no_gene   |
| MTAP      | no_gene   |
| no_gene   | no_gene   |
| MIPEPP3   | no_gene   |
| no_gene   | GVINP1    |
| no_gene   | GVINP1    |
| no_gene   | NIPA2     |
| no_gene   | no_gene   |
| no_gene   | no_gene   |
| no_gene   | no_gene   |
| DNAH11    | no_gene   |
| no_gene   | no_gene   |
| no_gene   | no_gene   |
| LINC00340 | LINC00340 |
| no_gene   | no_gene   |
| DNAH11    | no_gene   |
| LINC00340 | LINC00340 |
| CDKN2A    | HIF1A     |

|             |              |
|-------------|--------------|
| CDH12       | no_gene      |
| CDKN2B-AS1  | FAM153A      |
| CDKN2B-AS1  | FAM153A      |
| no_gene     | no_gene      |
| no_gene     | ANO10        |
| no_gene     | CTNND2       |
| no_gene     | CTNND2       |
| CDH12       | no_gene      |
| no_gene     | no_gene      |
| PPM1F       | PDE3B        |
| no_gene     | no_gene      |
| PPP3CC      | ENTPD4       |
| PPP3CC      | ENTPD4       |
| no_gene     | no_gene      |
| OR4N4       | no_gene      |
| SLC17A6     | no_gene      |
| ST8SIA1     | KCNQ5        |
| no_gene     | SLC17A6      |
| no_gene     | STEAP1B      |
| no_gene     | no_gene      |
| no_gene     | KDM4B        |
| no_gene     | OR4N4        |
| no_gene     | no_gene      |
| STEAP1B     | no_gene      |
| no_gene     | TBC1D10C     |
| no_gene     | no_gene      |
| ZNF98       | ZNF493       |
| no_gene     | no_gene      |
| no_gene     | STK32A       |
| no_gene     | no_gene      |
| no_gene     | ABHD12       |
| NCAM2       | NCAM2        |
| GAS2        | TPH2         |
| no_gene     | no_gene      |
| LOC10087306 | LOC100873065 |
| no_gene     | no_gene      |
| no_gene     | ANO3         |

|             |               |
|-------------|---------------|
| NCAM2       | NCAM2         |
| GOLGA6L1    | MARS          |
| GOLGA6L1    | MARS          |
| LOC10087306 | LOC100873065  |
| GOLGA6L1    | no_gene       |
| no_gene     | ATPBD4-AS1    |
| GOLGA6L1    | MARS          |
| GOLGA6L1    | CEP72         |
| ETNK1       | no_gene       |
| no_gene     | ABCC6P1       |
| no_gene     | SLC5A11       |
| no_gene     | no_gene       |
| no_gene     | no_gene       |
| no_gene     | no_gene       |
| no_gene     | SLC26A10      |
| no_gene     | ARHGEF25      |
| no_gene     | C1QTNF3-AMACR |
| no_gene     | no_gene       |
| ZBTB40      | NFATC3        |
| no_gene     | no_gene       |
| SNORD93     | no_gene       |
| TNFRSF10B   | CLDN23        |
| CYFIP1      | CLPTM1L       |
| CYFIP1      | CLPTM1L       |
| no_gene     | no_gene       |
| no_gene     | no_gene       |
| ZNF99       | no_gene       |
| no_gene     | no_gene       |
| ZNF99       | ZNF254        |
| ZNF99       | ZNF718        |
| no_gene     | FAM126A       |
| no_gene     | FAM126A       |
| no_gene     | C11orf21      |
| CYFIP1      | no_gene       |
| CYFIP1      | no_gene       |
| no_gene     | no_gene       |
| FAM126A     | no_gene       |
| FAM126A     | no_gene       |
| SSTR4       | no_gene       |
| NIPA2       | no_gene       |
| FAM126A     | ABCA13        |
| FAM126A     | ABCA13        |
| no_gene     | SSTR4         |
| no_gene     | no_gene       |

|           |              |
|-----------|--------------|
| no_gene   | no_gene      |
| no_gene   | no_gene      |
| no_gene   | MPP7         |
| no_gene   | no_gene      |
| KLHL7     | SLC12A6      |
| no_gene   | no_gene      |
| no_gene   | no_gene      |
| no_gene   | no_gene      |
| WHAMMP3   | SRGAP1       |
| WHAMMP3   | SRGAP1       |
| no_gene   | no_gene      |
| IGLL5     | IGLL3P       |
| no_gene   | RFPL2        |
| no_gene   | LOC100302640 |
| MIR548AJ2 | MIR548AJ2    |
| ENTPD4    | PPP3CC       |
| ENTPD4    | PPP3CC       |
| MIR548AJ2 | MIR548AJ2    |
| no_gene   | no_gene      |
| HERC2P7   | no_gene      |
| no_gene   | no_gene      |
| no_gene   | no_gene      |
| no_gene   | CASK         |
| no_gene   | BANK1        |
| no_gene   | no_gene      |
| no_gene   | no_gene      |
| IGF2BP3   | no_gene      |
| IGF2BP3   | no_gene      |
| IGF2BP3   | GRIP1        |
| no_gene   | no_gene      |
| no_gene   | no_gene      |
| no_gene   | no_gene      |
| IGF2BP3   | TTC17        |
| IGF2BP3   | TTC17        |
| no_gene   | no_gene      |
| GOLGA8S   | GOLGA8A      |
| no_gene   | no_gene      |
| RBMY1A1   | RBMY1F       |
| no_gene   | no_gene      |
| no_gene   | no_gene      |
| FAM221A   | no_gene      |

|         |              |
|---------|--------------|
| no_gene | no_gene      |
| FAM221A | no_gene      |
| OTUD1   | no_gene      |
| OTUD1   | no_gene      |
| FAM221A | no_gene      |
| ELAVL2  | ELAVL2       |
| no_gene | no_gene      |
| no_gene | no_gene      |
| STK31   | no_gene      |
| no_gene | no_gene      |
| ELAVL2  | ELAVL2       |
| no_gene | no_gene      |
| no_gene | CTNNA3       |
| no_gene | no_gene      |
| TAF4B   | no_gene      |
| PRKCB   | no_gene      |
| no_gene | no_gene      |
| no_gene | no_gene      |
| ZNF681  | ZNF85        |
| no_gene | JAZF1        |
| no_gene | no_gene      |
| GGTLC1  | LOC100272216 |
| no_gene | no_gene      |
| no_gene | TXNRD2       |
| PRKCB   | PRKCB        |
| no_gene | no_gene      |
| no_gene | no_gene      |
| no_gene | NUBPL        |
| PRKCB   | PRKCB        |
| no_gene | DYX1C1       |
| DCDC2   | DCDC2        |
| SLC2A11 | no_gene      |
| DCDC2   | DCDC2        |
| PRY     | no_gene      |
| DCDC2   | DCDC2        |
| no_gene | no_gene      |
| ZNF254  | ZNF99        |
| DCDC2   | DCDC2        |



|          |         |
|----------|---------|
| no_gene  | no_gene |
| no_gene  | no_gene |
| no_gene  | no_gene |
| KIAA1217 | no_gene |
| no_gene  | no_gene |
| KIAA1217 | no_gene |
| KIAA1217 | no_gene |
| DHRS4L2  | CCBL1   |
| RBM1F    | RBM1A1  |
| AQP4-AS1 | AZGP1   |
| no_gene  | FAM221A |
| no_gene  | no_gene |
| CDH10    | no_gene |
| CDH10    | SEMA5A  |
| CDH10    | SEMA5A  |
| no_gene  | AP3B1   |
| no_gene  | no_gene |
| RBM1F    | no_gene |
| SYNDIG1  | SYNDIG1 |
| CABIN1   | no_gene |
| CABIN1   | no_gene |
| LUZP2    | LUZP2   |
| RBM1F    | RBM1A3P |
| SYNDIG1  | SYNDIG1 |
| no_gene  | no_gene |
| no_gene  | MPP6    |
| LUZP2    | LUZP2   |
| MPP6     | no_gene |
| no_gene  | NCOA2   |
| no_gene  | FAM150A |
| no_gene  | no_gene |
| no_gene  | no_gene |
| MPP6     | no_gene |
| MPP6     | no_gene |
| no_gene  | no_gene |
| DFNA5    | no_gene |
| no_gene  | DFNA5   |
| OSBPL3   | no_gene |
| OSBPL3   | no_gene |
| SLC5A11  | no_gene |
| SLC5A11  | BRE     |
| SLC5A11  | BRE     |
| SLC5A11  | DTNB    |
| SLC5A11  | BRE     |

|            |            |
|------------|------------|
| SLC5A11    | BRE        |
| no_gene    | ISPD       |
| no_gene    | ISPD       |
| no_gene    | no_gene    |
| no_gene    | RIMS2      |
| no_gene    | KCNU1      |
| OSBPL3     | no_gene    |
| no_gene    | no_gene    |
| no_gene    | no_gene    |
| no_gene    | ASH1L      |
| ARHGAP17   | no_gene    |
| ARHGAP17   | no_gene    |
| POLA1      | POLA1      |
| no_gene    | no_gene    |
| POLA1      | POLA1      |
| GGT1       | POM121L10P |
| LUZP2      | no_gene    |
| DOCK5      | no_gene    |
| DOCK5      | no_gene    |
| POM121L10P | GGT1       |
| ADCY3      | ADCY3      |
| ADCY3      | ADCY3      |
| no_gene    | MMD2       |
| no_gene    | no_gene    |
| TPTE2P6    | no_gene    |
| TPTE2P6    | no_gene    |
| CYCS       | no_gene    |
| CYCS       | no_gene    |
| no_gene    | no_gene    |
| ABHD12     | no_gene    |
| ENKUR      | XPOT       |
| ENKUR      | XPOT       |
| no_gene    | SDK1       |
| no_gene    | SDK1       |
| no_gene    | no_gene    |

|         |         |
|---------|---------|
| no_gene | no_gene |
| no_gene | RBMY1F  |
| no_gene | no_gene |
| no_gene | no_gene |
| no_gene | no_gene |
| IGLL3P  | IGLL5   |
| LRP5L   | PHF10   |
| FAM182B | no_gene |
| FAM182B | no_gene |
| no_gene | no_gene |
| FAM182B | no_gene |
| FAM182B | no_gene |
| no_gene | GABRB3  |
| no_gene | GABRB3  |
| no_gene | VPS41   |
| no_gene | no_gene |
| GPR158  | GPR158  |
| DTNB    | no_gene |
| no_gene | FAF1    |
| DTNB    | SLC5A11 |
| DTNB    | ATL2    |
| GPR158  | GPR158  |
| DTNB    | no_gene |
| no_gene | FBXL7   |
| no_gene | no_gene |
| no_gene | EVPLL   |
| no_gene | no_gene |
| no_gene | CREB5   |
| no_gene | no_gene |
| MYO18B  | no_gene |

|           |           |
|-----------|-----------|
| no_gene   | no_gene   |
| no_gene   | no_gene   |
| no_gene   | no_gene   |
| RASSF8    | no_gene   |
| RASSF8    | no_gene   |
| no_gene   | no_gene   |
| no_gene   | RASSF8    |
| no_gene   | RASSF8    |
| no_gene   | no_gene   |
| SNX10     | LOC441204 |
| LOC441204 | SNX10     |
| LOC441204 | no_gene   |
| no_gene   | no_gene   |
| GAD2      | GAD2      |
| no_gene   | IKBKB     |
| GAD2      | GAD2      |
| ANO3      | no_gene   |
| no_gene   | no_gene   |
| no_gene   | no_gene   |
| GABRB3    | no_gene   |
| GABRB3    | no_gene   |
| no_gene   | KCNK3     |
| no_gene   | no_gene   |
| KCNK3     | no_gene   |
| no_gene   | LOC401324 |
| no_gene   | no_gene   |
| no_gene   | ZDHHC11   |
| no_gene   | no_gene   |
| no_gene   | ECM2      |
| HOXA3     | CSMD1     |
| no_gene   | CNTNAP4   |
| HOXA3     | CSMD1     |
| no_gene   | no_gene   |
| C12orf71  | no_gene   |
| no_gene   | MTAP      |
| no_gene   | no_gene   |
| no_gene   | no_gene   |

|           |             |
|-----------|-------------|
| no_gene   | TBK1        |
| no_gene   | TBK1        |
| EPHX2     | no_gene     |
| TCF23     | SLC5A6      |
| SLC5A6    | TCF23       |
| no_gene   | no_gene     |
| no_gene   | MIR4456     |
| no_gene   | MIR4456     |
| no_gene   | no_gene     |
| no_gene   | CCDC25      |
| no_gene   | CDH12       |
| no_gene   | CSMD1       |
| CCDC25    | no_gene     |
| no_gene   | no_gene     |
| KIAA0556  | KIAA0556    |
| no_gene   | no_gene     |
| KIAA0556  | KIAA0556    |
| no_gene   | no_gene     |
| no_gene   | ZNF90       |
| no_gene   | AKR1C3      |
| GSG1L     | GSG1L       |
| GSG1L     | GSG1L       |
| no_gene   | no_gene     |
| no_gene   | DTNB        |
| no_gene   | no_gene     |
| JAZF1     | no_gene     |
| no_gene   | no_gene     |
| no_gene   | no_gene     |
| no_gene   | APCDD1L-AS1 |
| no_gene   | APCDD1L-AS1 |
| no_gene   | no_gene     |
| JAZF1     | JAZF1-AS1   |
| no_gene   | SLC18A1     |
| JAZF1-AS1 | JAZF1       |
| no_gene   | no_gene     |
| no_gene   | no_gene     |
| no_gene   | PTPRR       |
| no_gene   | CEP85L      |
| no_gene   | PRY         |
| LINGO2    | LINGO2      |
| LINGO2    | LINGO2      |

|           |          |
|-----------|----------|
| BRE       | SLC5A11  |
| BRE       | SLC5A11  |
| no_gene   | no_gene  |
| no_gene   | no_gene  |
| BRE       | no_gene  |
| BRE       | no_gene  |
| no_gene   | no_gene  |
| no_gene   | no_gene  |
| MPP7      | no_gene  |
| no_gene   | EML4     |
| no_gene   | EML4     |
| no_gene   | HERC2P7  |
| no_gene   | no_gene  |
| no_gene   | no_gene  |
| no_gene   | ABCC6    |
| no_gene   | no_gene  |
| no_gene   | no_gene  |
| no_gene   | no_gene  |
| TTC28     | PLXNA2   |
| CCDC91    | SLCO1A2  |
| INTS9     | RRM2B    |
| no_gene   | no_gene  |
| CREB5     | no_gene  |
| no_gene   | no_gene  |
| CREB5     | no_gene  |
| CREB5     | no_gene  |
| CREB5     | no_gene  |
| LINGO2    | no_gene  |
| LINGO2    | no_gene  |
| TTC28     | SLC25A21 |
| no_gene   | no_gene  |
| no_gene   | DNM1P46  |
| IL1RAPL1  | IL1RAPL1 |
| IL1RAPL1  | IL1RAPL1 |
| PPP1CB    | FAM179A  |
| no_gene   | no_gene  |
| LOC646278 | no_gene  |
| TTC28     | no_gene  |
| TTC28     | no_gene  |
| no_gene   | no_gene  |
| IL1RAPL1  | IL1RAPL1 |

|           |           |
|-----------|-----------|
| IL1RAPL1  | IL1RAPL1  |
| no_gene   | no_gene   |
| no_gene   | RSG1      |
| no_gene   | no_gene   |
| EPB41     | TENM4     |
| FAM179A   | PPP1CB    |
| SLC25A52  | RIC8B     |
| no_gene   | OR2H1     |
| no_gene   | IGFBPL1   |
| no_gene   | IGFBPL1   |
| CLIP4     | no_gene   |
| CLIP4     | no_gene   |
| no_gene   | no_gene   |
| OR2H1     | no_gene   |
| no_gene   | LINGO2    |
| no_gene   | LINGO2    |
| no_gene   | no_gene   |
| no_gene   | no_gene   |
| FAR2      | no_gene   |
| no_gene   | GUSBP1    |
| no_gene   | no_gene   |
| no_gene   | WWC1      |
| NF1       | RABEP1    |
| MTUS2     | MTUS2     |
| no_gene   | no_gene   |
| MTUS2     | MTUS2     |
| no_gene   | no_gene   |
| LOC646762 | no_gene   |
| no_gene   | FAM134B   |
| no_gene   | FAM134B   |
| no_gene   | no_gene   |
| no_gene   | no_gene   |
| no_gene   | no_gene   |
| no_gene   | LOC728613 |
| no_gene   | LOC728613 |
| RBMS3     | ZNF385D   |
| no_gene   | MBD5      |
| no_gene   | MICA      |
| no_gene   | no_gene   |
| no_gene   | no_gene   |

|         |           |
|---------|-----------|
| no_gene | NELL1     |
| no_gene | NELL1     |
| no_gene | ACOT11    |
| no_gene | no_gene   |
| no_gene | no_gene   |
| HLA-H   | HLA-C     |
| no_gene | no_gene   |
| MTUS2   | MTUS2     |
| MTUS2   | MTUS2     |
| DEFB119 | DEFB121   |
| GAREM   | HNRNPA1L2 |
| DEFB121 | DEFB119   |
| MTUS2   | MTUS2     |
| MTUS2   | MTUS2     |
| MTUS2   | PSRC1     |
| MTUS2   | PSRC1     |
| ALK     | no_gene   |
| no_gene | no_gene   |
| no_gene | TAF4B     |
| no_gene | no_gene   |
| PRKD1   | PRKD1     |
| PRKD1   | PRKD1     |
| no_gene | no_gene   |
| no_gene | ABCC6P1   |
| no_gene | EML4      |
| no_gene | no_gene   |
| no_gene | no_gene   |
| no_gene | COX7A2L   |
| no_gene | no_gene   |
| LRRC37B | ARL17B    |
| LRRC37B | no_gene   |
| no_gene | no_gene   |
| LRRC37B | ARL17B    |
| no_gene | no_gene   |
| URI1    | no_gene   |
| no_gene | no_gene   |
| no_gene | no_gene   |



|              |              |
|--------------|--------------|
| no_gene      | no_gene      |
| no_gene      | URI1         |
| no_gene      | no_gene      |
| no_gene      | no_gene      |
| no_gene      | PAIP2B       |
| no_gene      | no_gene      |
| MPPED2       | no_gene      |
| no_gene      | no_gene      |
| no_gene      | MPPED2       |
| no_gene      | no_gene      |
| IPO8         | TMBIM6       |
| IPO8         | HOXC4        |
| no_gene      | no_gene      |
| no_gene      | no_gene      |
| no_gene      | no_gene      |
| INMT-FAM188B | no_gene      |
| DDR1         | VAR2         |
| LCLAT1       | LCLAT1       |
| LCLAT1       | LCLAT1       |
| INMT-FAM188B | INMT-FAM188B |
| no_gene      | no_gene      |
| VAR2         | DDR1         |
| INMT-FAM188B | INMT-FAM188B |
| no_gene      | no_gene      |
| no_gene      | ADCYAP1R1    |
| no_gene      | no_gene      |
| no_gene      | GOLGA6B      |
| no_gene      | no_gene      |
| no_gene      | no_gene      |
| ADCYAP1R1    | no_gene      |
| SCFD1        | SCFD1        |
| no_gene      | no_gene      |
| SCFD1        | SCFD1        |
| no_gene      | no_gene      |
| CDH6         | CDH6         |

|         |         |
|---------|---------|
| MYO1D   | ASIC2   |
| no_gene | no_gene |
| CDH6    | CDH6    |
| HLA-C   | HLA-H   |
| no_gene | no_gene |
| DCDC1   | DCDC1   |
| no_gene | no_gene |
| ASXL3   | CRY1    |
| HLA-B   | DHFR    |
| DCDC1   | DCDC1   |
| no_gene | LOC1720 |
| no_gene | LOC1720 |
| no_gene | UBAP2   |
| no_gene | UBAP2   |
| MICA    | no_gene |
| no_gene | no_gene |
| no_gene | no_gene |
| no_gene | no_gene |
| DROSHA  | TRAF5   |
| no_gene | no_gene |
| no_gene | no_gene |
| no_gene | no_gene |
| NOL4    | GLS2    |
| no_gene | no_gene |
| AP4S1   | no_gene |
| NOL4    | no_gene |
| NOL4    | SMARCC2 |
| STT3B   | STT3B   |
| ZEB1    | TCHHL1  |
| STT3B   | STT3B   |
| STT3B   | OSBPL10 |
| OSBPL10 | STT3B   |
| NRG1    | NRG1    |
| ASIC2   | ASIC2   |
| NRG1    | NRG1    |
| ASIC2   | ASIC2   |
| PDZD2   | no_gene |
| B3GALTL | MYO16   |
| ASIC2   | ASIC2   |
| OTUD7A  | no_gene |
| no_gene | no_gene |
| no_gene | no_gene |
| ASIC2   | ASIC2   |
| ZNF267  | no_gene |

|          |             |
|----------|-------------|
| no_gene  | no_gene     |
| NRG1     | NRG1        |
| no_gene  | no_gene     |
| no_gene  | no_gene     |
| NRG1     | NRG1        |
| DTNA     | RBMS2       |
| DTNA     | RBMS2       |
| ASIC2    | MYO1D       |
| NUBPL    | no_gene     |
| no_gene  | EYA2        |
| NUBPL    | NUBPL       |
| NUBPL    | NUBPL       |
| PDE1C    | no_gene     |
| no_gene  | PDE1C       |
| CHRNA7   | ULK4P3      |
| no_gene  | no_gene     |
| no_gene  | no_gene     |
| no_gene  | no_gene     |
| no_gene  | KLHL5       |
| no_gene  | KLHL5       |
| SLC5A1   | no_gene     |
| SLC5A1   | no_gene     |
| HLA-DRB6 | FAM8A1      |
| HLA-DRB6 | FAM8A1      |
| HLA-DRB6 | no_gene     |
| RFPL2    | no_gene     |
| no_gene  | no_gene     |
| no_gene  | GOLGA6B     |
| ULK4P3   | CHRNA7      |
| no_gene  | no_gene     |
| C10orf68 | C10orf68    |
| no_gene  | TMEM132E    |
| no_gene  | no_gene     |
| C10orf68 | C10orf68    |
| TMEM132E | no_gene     |
| no_gene  | ATL2        |
| AKAP6    | AKAP6       |
| no_gene  | no_gene     |
| AKAP6    | AKAP6       |
| no_gene  | no_gene     |
| no_gene  | APCDD1L-AS1 |

|          |             |
|----------|-------------|
| C10orf68 | IL22        |
| C10orf68 | IL22        |
| no_gene  | APCDD1L-AS1 |
| C10orf68 | no_gene     |
| HLA-DPA1 | HLA-DPB2    |
| DNAJA1   | GLI3        |
| no_gene  | PLD5        |
| HLA-DPB1 | HLA-DPB2    |
| SMU1     | no_gene     |
| no_gene  | no_gene     |
| C10orf68 | no_gene     |
| HLA-DPB2 | HLA-DPA1    |
| HLA-DPB2 | HLA-DPB1    |
| no_gene  | no_gene     |
| no_gene  | DYTN        |
| no_gene  | DYTN        |
| FMN1     | AOAH        |
| HUNK     | HUNK        |
| PDS5B    | no_gene     |
| HUNK     | HUNK        |
| FMN1     | no_gene     |
| FMN1     | no_gene     |
| no_gene  | PDS5B       |
| AQP7     | ANKRD20A8P  |
| AQP7     | ANKRD20A3   |
| AQP7     | ANKRD20A3   |
| RNU6-76  | no_gene     |
| no_gene  | no_gene     |
| ANKRD18B | no_gene     |
| TMCO5B   | no_gene     |
| ANKRD18B | no_gene     |
| no_gene  | no_gene     |
| no_gene  | no_gene     |
| no_gene  | no_gene     |
| RPRD1A   | no_gene     |
| no_gene  | no_gene     |
| no_gene  | ALK         |
| no_gene  | EML4        |
| no_gene  | EML4        |
| SLC39A6  | C12orf54    |
| no_gene  | no_gene     |
| no_gene  | PRSS3       |
| PRSS3    | no_gene     |
| no_gene  | no_gene     |

|            |          |
|------------|----------|
| no_gene    | no_gene  |
| no_gene    | no_gene  |
| no_gene    | no_gene  |
| no_gene    | OSBPL3   |
| no_gene    | no_gene  |
| no_gene    | no_gene  |
| no_gene    | C7orf10  |
| no_gene    | no_gene  |
| UBAP2      | no_gene  |
| UBAP2      | no_gene  |
| LARGE      | LGALS2   |
| no_gene    | no_gene  |
| C1QTNF3-AM | no_gene  |
| C1QTNF3-AM | 11-Mar   |
| no_gene    | no_gene  |
| C17orf66   | CCL5     |
| no_gene    | no_gene  |
| no_gene    | no_gene  |
| CCL5       | C17orf66 |
| no_gene    | no_gene  |
| no_gene    | no_gene  |
| FHOD3      | FHOD3    |
| no_gene    | no_gene  |
| no_gene    | no_gene  |
| no_gene    | no_gene  |
| FHOD3      | FHOD3    |
| no_gene    | no_gene  |
| no_gene    | no_gene  |
| no_gene    | HMGA2    |
| no_gene    | HMGA2    |
| NPSR1-AS1  | no_gene  |
| NPSR1-AS1  | PGM5P2   |
| no_gene    | no_gene  |
| no_gene    | no_gene  |
| no_gene    | CDH8     |
| CCL4       | no_gene  |
| CCL4       | no_gene  |
| PHF20      | no_gene  |
| DNAI1      | no_gene  |
| no_gene    | no_gene  |
| DNAI1      | no_gene  |

|           |           |
|-----------|-----------|
| KIAA1328  | KIAA1328  |
| NPSR1-AS1 | ANKMY2    |
| KATNBL1   | no_gene   |
| KIAA1328  | KIAA1328  |
| no_gene   | no_gene   |
| NPSR1-AS1 | no_gene   |
| no_gene   | no_gene   |
| SLC12A6   | KLHL7     |
| no_gene   | CCL4      |
| no_gene   | CCL4      |
| no_gene   | LOC148709 |
| GOLGA8A   | GOLGA8S   |
| no_gene   | no_gene   |
| NPSR1-AS1 | NPSR1-AS1 |
| no_gene   | no_gene   |
| no_gene   | no_gene   |
| KIAA0355  | no_gene   |
| KIAA0355  | no_gene   |
| NPSR1-AS1 | NPSR1-AS1 |
| NPSR1-AS1 | no_gene   |
| RAI14     | no_gene   |
| RAI14     | no_gene   |
| no_gene   | no_gene   |
| no_gene   | no_gene   |
| TMEM50B   | UFM1      |
| no_gene   | no_gene   |
| no_gene   | no_gene   |
| no_gene   | no_gene   |
| no_gene   | TMC1      |
| KIAA1045  | CDH4      |
| KIAA1045  | CDH4      |
| no_gene   | TNRC6B    |
| no_gene   | no_gene   |
| no_gene   | no_gene   |
| no_gene   | no_gene   |
| PRLR      | PRLR      |
| no_gene   | no_gene   |
| DPY19L2P1 | no_gene   |
| PRLR      | PRLR      |
| DPY19L2P1 | no_gene   |
| DPY19L2P1 | no_gene   |
| no_gene   | no_gene   |
| DPY19L2P1 | TBX20     |
| no_gene   | no_gene   |

|           |           |
|-----------|-----------|
| TBX20     | DPY19L2P1 |
| no_gene   | no_gene   |
| AQR       | MEIS2     |
| no_gene   | no_gene   |
| TBX20     | no_gene   |
| no_gene   | no_gene   |
| NDRG3     | no_gene   |
| NDRG3     | no_gene   |
| no_gene   | no_gene   |
| no_gene   | TBX20     |
| UNC13B    | UNC13B    |
| no_gene   | KIAA0825  |
| UNC13B    | UNC13B    |
| LOC401324 | no_gene   |
| no_gene   | OR6C68    |
| no_gene   | OR6C68    |
| no_gene   | no_gene   |
| no_gene   | no_gene   |
| ATP8B5P   | no_gene   |
| ATP8B5P   | no_gene   |
| no_gene   | no_gene   |
| no_gene   | no_gene   |
| HPN       | no_gene   |
| SAMHD1    | no_gene   |
| NBEA      | NBEA      |
| RBL1      | VPS13D    |
| NBEA      | NBEA      |
| no_gene   | no_gene   |
| HERPUD2   | no_gene   |
| SPEF2     | no_gene   |
| ARPP21    | ARPP21    |
| no_gene   | no_gene   |
| no_gene   | IKZF4     |
| no_gene   | no_gene   |
| ARPP21    | ARPP21    |
| no_gene   | SHMT2     |
| no_gene   | SHMT2     |
| no_gene   | BRE       |
| no_gene   | BRE       |
| IL7R      | no_gene   |
| no_gene   | FAM19A2   |

|            |             |
|------------|-------------|
| 7-Sep      | no_gene     |
| no_gene    | SPEF2       |
| ATPBD4-AS1 | no_gene     |
| ATPBD4-AS1 | no_gene     |
| ATPBD4-AS1 | no_gene     |
| no_gene    | SRC         |
| no_gene    | no_gene     |
| SRC        | no_gene     |
| UGT3A1     | TXNL4A      |
| ATPBD4-AS1 | no_gene     |
| no_gene    | no_gene     |
| SRC        | no_gene     |
| no_gene    | AVIL        |
| no_gene    | no_gene     |
| no_gene    | no_gene     |
| no_gene    | NOL4        |
| no_gene    | FAM19A2     |
| no_gene    | FAM19A2     |
| RUNX1      | RUNX1       |
| no_gene    | no_gene     |
| RUNX1      | RUNX1       |
| no_gene    | no_gene     |
| EPPD1      | ATF1        |
| no_gene    | no_gene     |
| CTNBL1     | no_gene     |
| no_gene    | no_gene     |
| STAC       | no_gene     |
| STAC       | STAC        |
| no_gene    | CDH22       |
| no_gene    | CDH22       |
| no_gene    | no_gene     |
| STAC       | STAC        |
| no_gene    | APCDD1L-AS1 |
| no_gene    | no_gene     |
| VSTM2L     | STAU1       |
| VSTM2L     | STAU1       |
| no_gene    | no_gene     |
| no_gene    | no_gene     |



|           |          |
|-----------|----------|
| no_gene   | no_gene  |
| no_gene   | TMTC2    |
| no_gene   | no_gene  |
| no_gene   | no_gene  |
| AOAH      | FMN1     |
| PTCSC3    | MBIP     |
| KCNU1     | no_gene  |
| TGM2      | no_gene  |
| no_gene   | no_gene  |
| MBIP      | PTCSC3   |
| no_gene   | TGM2     |
| no_gene   | no_gene  |
| no_gene   | KIAA1755 |
| KIAA1755  | no_gene  |
| no_gene   | ADAMTS6  |
| C15orf41  | no_gene  |
| NIPBL     | PLCXD3   |
| no_gene   | no_gene  |
| SFTA3     | no_gene  |
| no_gene   | no_gene  |
| no_gene   | SFTA3    |
| ELMO1     | ELMO1    |
| no_gene   | no_gene  |
| ELMO1     | ELMO1    |
| no_gene   | SKIV2L2  |
| ELMO1     | ELMO1    |
| ELMO1     | ELMO1    |
| ELMO1     | no_gene  |
| SLC25A21  | TTC28    |
| LOC145845 | BRD9     |
| MEIS2     | BRD9     |
| MEIS2     | no_gene  |
| ELMO1     | no_gene  |
| MEIS2     | no_gene  |
| MEIS2     | no_gene  |
| ELMO1     | no_gene  |
| MEIS2     | AQR      |

|           |          |
|-----------|----------|
| TBC1D22B  | TBC1D22B |
| no_gene   | no_gene  |
| TBC1D22B  | TBC1D22B |
| ELMO1     | no_gene  |
| ELMO1     | no_gene  |
| no_gene   | NELL2    |
| no_gene   | no_gene  |
| WDR70     | IL1RAPL2 |
| WDR70     | BCO2     |
| WDR70     | BCO2     |
| no_gene   | no_gene  |
| no_gene   | no_gene  |
| no_gene   | no_gene  |
| no_gene   | IL1RAPL2 |
| WDR70     | no_gene  |
| WDR70     | no_gene  |
| C1QTNF6   | ENTHD1   |
| no_gene   | ELMO1    |
| no_gene   | CDK13    |
| no_gene   | no_gene  |
| RAB11FIP1 | FAM110B  |
| no_gene   | no_gene  |
| no_gene   | no_gene  |
| no_gene   | ADAMTS6  |
| no_gene   | ADAMTS6  |
| no_gene   | ADAMTS6  |
| GDNF      | no_gene  |
| no_gene   | no_gene  |
| no_gene   | GDNF     |
| LGALS2    | LARGE    |
| no_gene   | no_gene  |
| no_gene   | CT60     |
| no_gene   | CT60     |
| no_gene   | no_gene  |
| no_gene   | no_gene  |
| no_gene   | no_gene  |
| POSTN     | no_gene  |
| ZNF607    | ZNF573   |
| no_gene   | PNPLA7   |
| ZNF573    | ZNF607   |
| ZNF25     | HSD11B1  |

|             |         |
|-------------|---------|
| no_gene     | ABCC2   |
| ZNF25       | no_gene |
| no_gene     | no_gene |
| no_gene     | ATG5    |
| no_gene     | SPINK8  |
| no_gene     | no_gene |
| no_gene     | ZNF493  |
| INPP5B      | no_gene |
| LOC10050677 | no_gene |
| IGFBPL1     | no_gene |
| IGFBPL1     | no_gene |
| no_gene     | CBFB    |
| AMPH        | AMPH    |
| no_gene     | EML4    |
| AMPH        | AMPH    |
| ATL2        | ATL2    |
| no_gene     | no_gene |
| ATL2        | DTNB    |
| BTBD9       | ARHGEF7 |
| ATL2        | ATL2    |
| ANKRD18A    | no_gene |
| ATL2        | no_gene |
| AMPH        | ZNF324B |
| no_gene     | no_gene |
| LOC399744   | no_gene |
| no_gene     | no_gene |
| HTRA4       | no_gene |
| no_gene     | no_gene |
| no_gene     | SLCO1C1 |
| no_gene     | no_gene |
| no_gene     | no_gene |
| no_gene     | no_gene |
| VPS41       | no_gene |
| no_gene     | no_gene |
| no_gene     | no_gene |

|           |              |
|-----------|--------------|
| UFM1      | TMEM50B      |
| ADAM9     | no_gene      |
| RICTOR    | RICTOR       |
| no_gene   | no_gene      |
| no_gene   | CANX         |
| no_gene   | CANX         |
| RICTOR    | RICTOR       |
| no_gene   | no_gene      |
| CPNE8     | no_gene      |
| no_gene   | no_gene      |
| no_gene   | no_gene      |
| KLHL5     | no_gene      |
| KLHL5     | no_gene      |
| ADAM32    | ADAM32       |
| no_gene   | no_gene      |
| FYB       | no_gene      |
| FYB       | no_gene      |
| ADAM32    | ADAM32       |
| LINC00639 | ZFP41        |
| SPATA31A2 | no_gene      |
| SPATA31A2 | no_gene      |
| SPATA31A2 | no_gene      |
| no_gene   | no_gene      |
| no_gene   | no_gene      |
| RPSA      | no_gene      |
| no_gene   | no_gene      |
| no_gene   | no_gene      |
| no_gene   | NR3C2        |
| ADAM18    | SGCZ         |
| KIF6      | KIF6         |
| no_gene   | no_gene      |
| KIF6      | KIF6         |
| no_gene   | no_gene      |
| no_gene   | LOC100507053 |
| LINC00265 | PDE3A        |
| no_gene   | KIAA1217     |
| MGAT3     | CACNA1I      |
| no_gene   | POTEJ        |
| no_gene   | LOC100506776 |
| CACNA1I   | MGAT3        |
| CDK13     | no_gene      |

|         |          |
|---------|----------|
| no_gene | CD48     |
| no_gene | no_gene  |
| no_gene | TPK1     |
| C7orf10 | no_gene  |
| no_gene | no_gene  |
| ENTHD1  | C1QTNF6  |
| no_gene | LONRF1   |
| no_gene | ADAM9    |
| MYRIP   | no_gene  |
| no_gene | no_gene  |
| COG6    | COG6     |
| SRP14   | C11orf75 |
| no_gene | no_gene  |
| SLC2A13 | no_gene  |
| SLC2A13 | WHSC1    |
| COG6    | COG6     |
| no_gene | no_gene  |
| LRRC4C  | LRRC4C   |
| SLC2A13 | SLC2A13  |
| SLC2A13 | SLC2A13  |
| LRRC4C  | LRRC4C   |
| SLC2A13 | no_gene  |
| RIT2    | RIT2     |
| RIT2    | RIT2     |
| C7orf10 | TWIST1   |
| ZMAT4   | no_gene  |
| DISP2   | DCHS1    |
| IVD     | C7orf10  |
| C7orf10 | IVD      |
| TNRC6B  | no_gene  |
| BAHD1   | no_gene  |
| PTPRT   | PTPRT    |
| no_gene | no_gene  |
| no_gene | TMEM131  |
| no_gene | no_gene  |
| no_gene | OSBPL3   |
| no_gene | ADAM10   |

|             |              |
|-------------|--------------|
| no_gene     | no_gene      |
| no_gene     | ZNF99        |
| no_gene     | no_gene      |
| no_gene     | no_gene      |
| no_gene     | no_gene      |
| no_gene     | ULK4         |
| PCP4        | no_gene      |
| PLCXD3      | NIPBL        |
| ULK4        | no_gene      |
| no_gene     | PCP4         |
| INO80       | no_gene      |
| TPTE2P5     | no_gene      |
| no_gene     | no_gene      |
| no_gene     | no_gene      |
| CASK        | no_gene      |
| no_gene     | no_gene      |
| no_gene     | no_gene      |
| no_gene     | no_gene      |
| ANK1        | no_gene      |
| PDZRN4      | PDZRN4       |
| PTPRT       | LOC100996307 |
| PTPRT       | LOC100996307 |
| no_gene     | no_gene      |
| PDZRN4      | PDZRN4       |
| CASK        | CASK         |
| no_gene     | no_gene      |
| CASK        | CASK         |
| no_gene     | CLIP4        |
| no_gene     | CLIP4        |
| INHBA-AS1   | no_gene      |
| no_gene     | no_gene      |
| PDZRN4      | TMEM117      |
| no_gene     | PTPRD        |
| no_gene     | no_gene      |
| MGC21881    | no_gene      |
| LOC10050549 | STK32A       |
| LOC10050549 | no_gene      |
| LOC10050549 | STK32A       |
| no_gene     | no_gene      |
| no_gene     | C15orf41     |
| no_gene     | no_gene      |

|           |          |
|-----------|----------|
| no_gene   | TPM3     |
| no_gene   | TPM3     |
| no_gene   | TPM3     |
| no_gene   | no_gene  |
| no_gene   | TPM3     |
| no_gene   | TPM3     |
| no_gene   | TPM3     |
| no_gene   | no_gene  |
| no_gene   | no_gene  |
| GLI3      | GLI3     |
| DSCAM     | DSCAM    |
| no_gene   | no_gene  |
| DSCAM     | DSCAM    |
| GLI3      | GLI3     |
| TMEM101   | no_gene  |
| GLI3      | DNAJA1   |
| no_gene   | DLG2     |
| no_gene   | MBOAT2   |
| no_gene   | no_gene  |
| GUCA1A    | no_gene  |
| no_gene   | no_gene  |
| GLI3      | no_gene  |
| no_gene   | no_gene  |
| IKBKB     | no_gene  |
| L3MBTL1   | L3MBTL1  |
| no_gene   | no_gene  |
| no_gene   | no_gene  |
| L3MBTL1   | L3MBTL1  |
| no_gene   | MIPEPP3  |
| DSCAM     | no_gene  |
| no_gene   | no_gene  |
| no_gene   | DSCAM    |
| no_gene   | ARHGAP17 |
| no_gene   | ARHGAP17 |
| no_gene   | no_gene  |
| no_gene   | ZNF704   |
| no_gene   | ARFGAP1  |
| no_gene   | no_gene  |
| no_gene   | FLJ39739 |
| ANKRD20A2 | NA       |
| no_gene   | no_gene  |
| no_gene   | no_gene  |
| no_gene   | no_gene  |
| no_gene   | ASH1L    |

|             |             |
|-------------|-------------|
| no_gene     | no_gene     |
| HIVEP3      | no_gene     |
| no_gene     | no_gene     |
| no_gene     | no_gene     |
| EML4        | RMDN2       |
| GHR         | GHR         |
| EML4        | no_gene     |
| GHR         | GHR         |
| VIPR1       | VIPR1       |
| EML4        | no_gene     |
| EML4        | no_gene     |
| EML4        | ALK         |
| EML4        | ALK         |
| UBR2        | UBR2        |
| VIPR1       | VIPR1       |
| CHRNA3      | no_gene     |
| CHRNA3      | no_gene     |
| COX7A2L     | no_gene     |
| UBR2        | UBR2        |
| no_gene     | no_gene     |
| no_gene     | no_gene     |
| no_gene     | SEPT7P2     |
| no_gene     | no_gene     |
| no_gene     | CBWD3       |
| no_gene     | CBWD3       |
| no_gene     | no_gene     |
| no_gene     | no_gene     |
| no_gene     | ATPBD4-AS1  |
| no_gene     | ATPBD4-AS1  |
| no_gene     | no_gene     |
| no_gene     | no_gene     |
| no_gene     | AKR1C3      |
| no_gene     | no_gene     |
| no_gene     | CDH4        |
| LOC10099630 | PTPRT       |
| LOC10099630 | PTPRT       |
| no_gene     | no_gene     |
| no_gene     | no_gene     |
| no_gene     | RPS26       |
| no_gene     | RPS26       |
| LOC10099630 | FPGT-TNNI3K |
| no_gene     | IKZF4       |
| no_gene     | no_gene     |
| ANKRD20A3   | AQP7P1      |



|           |           |
|-----------|-----------|
| ANKRD20A3 | AQP7P1    |
| ANKRD20A3 | AQP7P1    |
| ANKRD20A3 | AQP7      |
| ANKRD20A3 | AQP7      |
| ANKRD20A3 | AQP7P1    |
| LOC642929 | no_gene   |
| no_gene   | no_gene   |
| no_gene   | no_gene   |
| no_gene   | KIAA0355  |
| no_gene   | KIAA0355  |
| no_gene   | no_gene   |
| no_gene   | OR6C76    |
| no_gene   | OR6C76    |
| HNRNPKP3  | no_gene   |
| no_gene   | HNRNPKP3  |
| no_gene   | no_gene   |
| UBR1      | no_gene   |
| no_gene   | TMC6      |
| no_gene   | no_gene   |
| TTC17     | IGF2BP3   |
| TTC17     | IGF2BP3   |
| no_gene   | no_gene   |
| no_gene   | ETNK1     |
| RET       | LMX1B     |
| ANO10     | no_gene   |
| no_gene   | LOC284344 |
| no_gene   | SPATA31A2 |
| no_gene   | SPATA31A2 |
| no_gene   | no_gene   |
| LOC284344 | no_gene   |
| no_gene   | SEMG2     |
| ADAMTS20  | NELL2     |
| no_gene   | no_gene   |
| SEMG2     | no_gene   |
| CRHR1     | CRHR1     |
| no_gene   | no_gene   |
| no_gene   | no_gene   |

|         |         |
|---------|---------|
| CRHR1   | CRHR1   |
| no_gene | RAI14   |
| no_gene | no_gene |
| no_gene | PTPRD   |
| no_gene | no_gene |
| no_gene | no_gene |
| CAMK2B  | CAMK2B  |
| CAMK2B  | no_gene |
| CAMK2B  | CAMK2B  |
| no_gene | LRRC37B |
| ST3GAL3 | ST3GAL3 |
| ST3GAL3 | ST3GAL3 |
| no_gene | no_gene |
| no_gene | no_gene |
| ARL17B  | LRRC37B |
| ARL17B  | LRRC37B |
| no_gene | no_gene |
| no_gene | PTPRD   |
| no_gene | SH3GL2  |
| ZNF222  | ZNF223  |
| ZNF223  | ZNF222  |
| MMP9    | SLC12A5 |
| SLC12A5 | MMP9    |
| TMEM117 | PDZRN4  |
| CDH22   | CDH22   |
| CDH22   | no_gene |
| CDH22   | no_gene |
| no_gene | SCN8A   |
| CDH22   | CDH22   |
| KDM6A   | no_gene |
| CAMKMT  | WDR49   |
| no_gene | no_gene |
| SPG11   | B2M     |
| no_gene | no_gene |
| B2M     | SPG11   |
| no_gene | no_gene |
| no_gene | ATF1    |
| no_gene | no_gene |
| no_gene | no_gene |
| no_gene | CCSER1  |

|            |            |
|------------|------------|
| no_gene    | no_gene    |
| IGSF23     | WDR35      |
| no_gene    | no_gene    |
| NELL2      | no_gene    |
| SUPT3H     | no_gene    |
| no_gene    | no_gene    |
| NELL2      | ADAMTS20   |
| no_gene    | no_gene    |
| no_gene    | no_gene    |
| no_gene    | RARS       |
| TMEM72-AS1 | TMEM72-AS1 |
| EFCAB13    | EFCAB13    |
| TMEM72-AS1 | TMEM72-AS1 |
| no_gene    | no_gene    |
| EFCAB13    | EFCAB13    |
| CLPTM1     | KCNA7      |
| RUNX2      | no_gene    |
| RUNX2      | no_gene    |
| no_gene    | no_gene    |
| no_gene    | no_gene    |
| no_gene    | no_gene    |
| NUFIP1     | KIAA1704   |
| no_gene    | no_gene    |
| KIAA1704   | NUFIP1     |
| no_gene    | no_gene    |
| ANO6       | PLEKHA5    |
| no_gene    | RUNX2      |
| no_gene    | RUNX2      |
| no_gene    | no_gene    |
| no_gene    | no_gene    |
| no_gene    | no_gene    |
| EYA2       | no_gene    |
| SEPT7P2    | no_gene    |
| ANO6       | no_gene    |
| no_gene    | no_gene    |
| no_gene    | ANO6       |
| no_gene    | no_gene    |
| no_gene    | PDE3A      |
| no_gene    | no_gene    |
| no_gene    | NDUFS6     |
| no_gene    | no_gene    |



|           |              |
|-----------|--------------|
| SOCS5     | no_gene      |
| SOCS5     | no_gene      |
| no_gene   | PPYR1        |
| no_gene   | PPYR1        |
| no_gene   | FAR2         |
| PPYR1     | no_gene      |
| PPYR1     | no_gene      |
| no_gene   | no_gene      |
| no_gene   | no_gene      |
| LINC00842 | FAM25B       |
| no_gene   | no_gene      |
| no_gene   | SDHAP3       |
| no_gene   | SERGEF       |
| no_gene   | SERGEF       |
| C2orf61   | ADIPOR2      |
| CYP4Z2P   | no_gene      |
| AMIGO2    | no_gene      |
| no_gene   | no_gene      |
| no_gene   | CELSR2       |
| no_gene   | CELSR2       |
| no_gene   | no_gene      |
| no_gene   | no_gene      |
| PHKB      | PHKB         |
| no_gene   | no_gene      |
| PHKB      | PHKB         |
| GPR115    | no_gene      |
| no_gene   | GPR115       |
| no_gene   | no_gene      |
| no_gene   | no_gene      |
| STAU1     | VSTM2L       |
| STAU1     | VSTM2L       |
| no_gene   | no_gene      |
| no_gene   | no_gene      |
| no_gene   | SLC2A11      |
| no_gene   | INPP5B       |
| no_gene   | no_gene      |
| no_gene   | no_gene      |
| no_gene   | no_gene      |
| no_gene   | LOC100287944 |
| PKD1L1    | EIF2AK1      |
| PKD1L1    | EIF2AK1      |

|           |              |
|-----------|--------------|
| no_gene   | no_gene      |
| no_gene   | RPIA         |
| no_gene   | no_gene      |
| no_gene   | no_gene      |
| no_gene   | no_gene      |
| KCNB1     | no_gene      |
| KCNB1     | ATP9A        |
| no_gene   | MAGI3        |
| MDGA2     | no_gene      |
| no_gene   | no_gene      |
| no_gene   | MDGA2        |
| MAPK4     | MAPK4        |
| MAPK4     | MAPK4        |
| LINC00648 | MIR3648      |
| no_gene   | no_gene      |
| no_gene   | UTRN         |
| no_gene   | no_gene      |
| no_gene   | no_gene      |
| TRABD2B   | no_gene      |
| TRABD2B   | LOC653486    |
| TRABD2B   | LOC653486    |
| TRABD2B   | no_gene      |
| TRABD2B   | no_gene      |
| no_gene   | no_gene      |
| ABCA13    | FAM126A      |
| ABCA13    | FAM126A      |
| no_gene   | no_gene      |
| no_gene   | no_gene      |
| SPINK8    | no_gene      |
| ABCA13    | ABCA13       |
| no_gene   | TMEM198B     |
| ABCA13    | ABCA13       |
| SENP1     | TSPAN31      |
| SENP1     | TSPAN31      |
| no_gene   | INMT-FAM188B |
| PFKM      | FBXW8        |
| PFKM      | no_gene      |

|          |             |
|----------|-------------|
| no_gene  | ZNF493      |
| N4BP1    | no_gene     |
| no_gene  | no_gene     |
| no_gene  | no_gene     |
| SKINTL   | SLC5A9      |
| no_gene  | SLC5A9      |
| no_gene  | no_gene     |
| no_gene  | no_gene     |
| no_gene  | no_gene     |
| no_gene  | CYB5B       |
| no_gene  | no_gene     |
| no_gene  | CYB5B       |
| no_gene  | TERF2       |
| SLC5A9   | SKINTL      |
| no_gene  | TERF2       |
| SLC5A9   | no_gene     |
| SLC5A9   | no_gene     |
| no_gene  | no_gene     |
| SLC5A9   | no_gene     |
| no_gene  | ELMO1       |
| no_gene  | no_gene     |
| no_gene  | AGBL4       |
| no_gene  | AGBL4       |
| no_gene  | no_gene     |
| no_gene  | APCDD1L-AS1 |
| no_gene  | APCDD1L-AS1 |
| no_gene  | CPM         |
| no_gene  | no_gene     |
| no_gene  | no_gene     |
| no_gene  | no_gene     |
| C12orf54 | FAM19A2     |
| SPATA6   | no_gene     |
| SPATA6   | no_gene     |
| FBN1     | no_gene     |
| no_gene  | N4BP1       |
| no_gene  | no_gene     |
| no_gene  | ANKRD33B    |

|         |           |
|---------|-----------|
| no_gene | AGBL4     |
| no_gene | no_gene   |
| no_gene | no_gene   |
| AGBL4   | no_gene   |
| AGBL4   | no_gene   |
| no_gene | no_gene   |
| AGBL4   | no_gene   |
| no_gene | no_gene   |
| no_gene | no_gene   |
| no_gene | no_gene   |
| CCNT1   | PTPRR     |
| CCNT1   | DIP2B     |
| CCNT1   | DIP2B     |
| CCNT1   | PTPRR     |
| no_gene | no_gene   |
| no_gene | no_gene   |
| no_gene | no_gene   |
| no_gene | FAM156A   |
| no_gene | SPATA6    |
| no_gene | no_gene   |
| FAM25B  | LINC00842 |
| no_gene | no_gene   |
| WNT1    | no_gene   |
| no_gene | no_gene   |
| no_gene | no_gene   |
| no_gene | no_gene   |
| GLYATL3 | PLD5      |
| no_gene | SLC6A19   |
| no_gene | no_gene   |
| no_gene | FLJ33360  |
| no_gene | no_gene   |
| TUBA1B  | FAM19A2   |
| no_gene | BRAP      |
| KCNA7   | CLPTM1    |
| no_gene | no_gene   |
| no_gene | no_gene   |
| no_gene | no_gene   |
| no_gene | PFKM      |
| no_gene | PFKM      |
| no_gene | KCNB1     |



|          |          |
|----------|----------|
| RNF123   | NBPF1    |
| C1QL4    | SRGAP1   |
| no_gene  | SRGAP1   |
| DNAJC22  | PPM1H    |
| DNAJC22  | ITGA7    |
| no_gene  | PPM1H    |
| no_gene  | PPM1H    |
| no_gene  | DIP2B    |
| ARHGAP22 | ARHGAP22 |
| ARHGAP22 | ARHGAP22 |
| SPATS2   | no_gene  |
| no_gene  | no_gene  |
| SPATS2   | TSPAN31  |
| SPATS2   | TSPAN31  |
| no_gene  | no_gene  |
| no_gene  | no_gene  |
| SPATS2   | ATXN2    |
| SPATS2   | ATXN2    |
| CAB39L   | CAB39L   |
| no_gene  | no_gene  |
| CAB39L   | CAB39L   |
| no_gene  | TXNDC11  |
| MCRS1    | no_gene  |
| MCRS1    | no_gene  |
| MCRS1    | CDK4     |
| MCRS1    | no_gene  |
| MCRS1    | no_gene  |
| FAM186B  | NXPH4    |
| FAM186B  | NXPH4    |
| FAM186B  | KIF5A    |
| FAM186B  | IKZF4    |
| FAM186B  | PIP4K2C  |
| FAM186B  | no_gene  |
| no_gene  | no_gene  |
| AGBL4    | no_gene  |
| no_gene  | no_gene  |
| CCNB3    | ZNF678   |
| ZPBP     | ACSM1    |
| ZPBP     | no_gene  |
| no_gene  | no_gene  |
| TMBIM6   | IPO8     |

|           |              |
|-----------|--------------|
| no_gene   | no_gene      |
| FAIM2     | ITGA7        |
| FAIM2     | no_gene      |
| no_gene   | no_gene      |
| ATP9A     | KCNB1        |
| no_gene   | no_gene      |
| no_gene   | no_gene      |
| IKZF1     | DDC          |
| IKZF1     | no_gene      |
| ASIC1     | no_gene      |
| no_gene   | ANGPT1       |
| no_gene   | GNAO1        |
| C14orf183 | LOC100507250 |
| no_gene   | no_gene      |
| LIMA1     | PPM1H        |
| LIMA1     | no_gene      |
| DDC       | IKZF1        |
| LIMA1     | DIP2B        |
| no_gene   | MAP2K3       |
| no_gene   | no_gene      |
| no_gene   | no_gene      |
| no_gene   | no_gene      |
| no_gene   | BAZ2A        |
| C10orf53  | C10orf53     |
| no_gene   | no_gene      |
| DOCK3     | DOCK3        |
| C10orf53  | no_gene      |
| DIP2B     | LIMA1        |
| DIP2B     | MON2         |
| DIP2B     | MON2         |
| C10orf53  | C10orf53     |
| DIP2B     | no_gene      |
| DIP2B     | RAB5B        |
| MAP4K5    | ATL1         |
| no_gene   | CTNND2       |
| no_gene   | no_gene      |
| DOCK3     | DOCK3        |
| no_gene   | no_gene      |

|         |           |
|---------|-----------|
| no_gene | no_gene   |
| ATL1    | no_gene   |
| DIP2B   | CCNT1     |
| DIP2B   | CCNT1     |
| no_gene | no_gene   |
| ATL1    | MAP4K5    |
| SNAR-F  | SNAR-I    |
| SNAR-F  | SNAR-I    |
| SHANK3  | CR2       |
| ATF1    | EEPD1     |
| no_gene | KTN1      |
| ATF1    | no_gene   |
| ATF1    | no_gene   |
| ATF1    | FLJ12825  |
| ATF1    | FLJ12825  |
| no_gene | no_gene   |
| NIN     | DACT1     |
| NIN     | no_gene   |
| no_gene | no_gene   |
| no_gene | no_gene   |
| FAF1    | no_gene   |
| no_gene | no_gene   |
| no_gene | no_gene   |
| no_gene | LINC00174 |
| no_gene | CCDC132   |
| no_gene | no_gene   |
| CYP19A1 | no_gene   |
| CYP19A1 | no_gene   |
| no_gene | no_gene   |
| GLDN    | no_gene   |
| no_gene | no_gene   |
| no_gene | PRAMEF9   |
| no_gene | no_gene   |
| no_gene | CT49      |
| no_gene | no_gene   |
| no_gene | no_gene   |
| TSHZ2   | GNG13     |
| no_gene | PFKFB1    |

|         |          |
|---------|----------|
| SCN8A   | SCN8A    |
| SCN8A   | no_gene  |
| SCN8A   | SCN8A    |
| SCN8A   | FLJ12825 |
| SCN8A   | FLJ12825 |
| no_gene | IL7R     |
| SCN8A   | MAGI3    |
| SCN8A   | HNRNPA3  |
| SCN8A   | no_gene  |
| NRD1    | no_gene  |
| DYNAP   | no_gene  |
| no_gene | DYNAP    |
| FPR3    | no_gene  |
| PXDNL   | CYP7B1   |
| no_gene | no_gene  |
| no_gene | no_gene  |
| no_gene | ARHGEF7  |
| no_gene | no_gene  |
| PXDNL   | PXDNL    |
| SUMO1P1 | COPA     |
| PXDNL   | PXDNL    |
| no_gene | no_gene  |
| no_gene | OR6C1    |
| ATP7B   | no_gene  |
| no_gene | no_gene  |
| no_gene | no_gene  |
| no_gene | no_gene  |
| PXDNL   | SRSF11   |
| ZFYVE9  | IPP      |
| KRT81   | KRT82    |
| KRT81   | KRT84    |
| PPP2R1A | ZNF627   |
| no_gene | EBF1     |
| KRT84   | KRT81    |
| no_gene | no_gene  |
| KRT82   | KRT81    |
| no_gene | no_gene  |
| no_gene | TPTE2P6  |
| no_gene | no_gene  |
| no_gene | TPTE2P6  |
| no_gene | TPTE2P5  |
| no_gene | no_gene  |
| no_gene | no_gene  |
| no_gene | no_gene  |

|           |           |
|-----------|-----------|
| no_gene   | RFC4      |
| no_gene   | no_gene   |
| NDUFS4    | no_gene   |
| FBXO9     | ATXN1     |
| FAM156A   | no_gene   |
| no_gene   | no_gene   |
| no_gene   | no_gene   |
| no_gene   | BTBD10    |
| no_gene   | no_gene   |
| no_gene   | no_gene   |
| no_gene   | no_gene   |
| ARL15     | no_gene   |
| HNRNPA1L2 | GAREM     |
| no_gene   | no_gene   |
| no_gene   | no_gene   |
| no_gene   | no_gene   |
| ST18      | ST18      |
| ST18      | ST18      |
| KRT8      | no_gene   |
| no_gene   | no_gene   |
| no_gene   | no_gene   |
| FAM150A   | TRPS1     |
| FAM150A   | no_gene   |
| SOAT2     | AVIL      |
| no_gene   | no_gene   |
| no_gene   | no_gene   |
| no_gene   | HUWE1     |
| no_gene   | LOC283856 |
| no_gene   | no_gene   |
| no_gene   | no_gene   |
| no_gene   | no_gene   |
| HUWE1     | no_gene   |
| no_gene   | no_gene   |
| RPGRIP1L  | GNAO1     |
| RPGRIP1L  | GNAO1     |
| CACNA1D   | CACNA1D   |
| CACNA1D   | CACNA1D   |
| no_gene   | CYP4Z2P   |
| no_gene   | no_gene   |
| no_gene   | no_gene   |
| no_gene   | no_gene   |
| MLIP      | MLIP      |
| no_gene   | no_gene   |

|          |              |
|----------|--------------|
| no_gene  | CACNA2D3     |
| MLIP     | MLIP         |
| no_gene  | LOC100506023 |
| no_gene  | IL22         |
| CALCOCO1 | no_gene      |
| CACNA2D3 | MIR4272      |
| no_gene  | no_gene      |
| no_gene  | IL1RAPL2     |
| HOXC4    | IPO8         |
| CDC20B   | no_gene      |
| FLJ12825 | BEST3        |
| FLJ12825 | ATF1         |
| FLJ12825 | ATF1         |
| FLJ12825 | SCN8A        |
| WDR7     | WDR7         |
| FLJ12825 | SCN8A        |
| no_gene  | no_gene      |
| WDR7     | WDR7         |
| no_gene  | BAZ2A        |
| SKIV2L2  | no_gene      |
| CACNA2D3 | no_gene      |
| CACNA2D3 | ERC2         |
| SSBP3    | SSBP3        |
| SSBP3    | SSBP3        |
| MC3R     | no_gene      |
| PFKFB1   | no_gene      |
| EML6     | EML6         |
| EML6     | EML6         |
| CASS4    | CDH4         |
| no_gene  | OR6C65       |
| no_gene  | OR6C65       |
| no_gene  | FMN1         |
| no_gene  | FMN1         |
| ACOT11   | no_gene      |
| ACOT11   | VPS8         |
| no_gene  | DOCK2        |
| SAMD4A   | no_gene      |

|         |              |
|---------|--------------|
| SAMD4A  | no_gene      |
| IL31RA  | IL31RA       |
| no_gene | no_gene      |
| no_gene | no_gene      |
| IL31RA  | IL31RA       |
| no_gene | no_gene      |
| no_gene | ELMO1        |
| no_gene | ELMO1        |
| no_gene | no_gene      |
| no_gene | FAM19A2      |
| no_gene | FAM19A2      |
| IL6ST   | MEIS3P1      |
| no_gene | no_gene      |
| no_gene | no_gene      |
| TESPA1  | no_gene      |
| no_gene | no_gene      |
| no_gene | PCDH15       |
| no_gene | no_gene      |
| no_gene | HPGDS        |
| no_gene | no_gene      |
| OR6C1   | no_gene      |
| OR6C3   | LOC100131320 |
| OR6C65  | no_gene      |
| OR6C65  | no_gene      |
| no_gene | no_gene      |
| OR6C65  | no_gene      |
| OR6C65  | no_gene      |
| DYX1C1  | PLA2G4A      |
| DYX1C1  | no_gene      |
| no_gene | OR2AP1       |
| no_gene | OR2AP1       |
| no_gene | ATF7IP       |
| OR6C76  | no_gene      |
| OR6C76  | no_gene      |
| no_gene | LINC00174    |
| no_gene | no_gene      |
| no_gene | no_gene      |

|           |          |
|-----------|----------|
| no_gene   | COPA     |
| no_gene   | COPA     |
| OR6C68    | no_gene  |
| OR6C68    | no_gene  |
| ERC2      | CACNA2D3 |
| no_gene   | no_gene  |
| OR2AP1    | no_gene  |
| OR2AP1    | no_gene  |
| no_gene   | OR6C65   |
| no_gene   | OR6C65   |
| no_gene   | WNT1     |
| no_gene   | no_gene  |
| no_gene   | no_gene  |
| no_gene   | CNTNAP3  |
| no_gene   | CNTNAP3  |
| no_gene   | DNAI1    |
| no_gene   | DNAI1    |
| ITGA7     | FAIM2    |
| ITGA7     | DNAJC22  |
| no_gene   | no_gene  |
| CD63      | no_gene  |
| KTN1      | no_gene  |
| no_gene   | no_gene  |
| ZNF580    | no_gene  |
| no_gene   | no_gene  |
| no_gene   | no_gene  |
| PCDH15    | no_gene  |
| no_gene   | no_gene  |
| no_gene   | no_gene  |
| LOC283856 | no_gene  |
| TMEM198B  | no_gene  |
| no_gene   | no_gene  |
| GNAO1     | no_gene  |
| no_gene   | FAIM2    |
| no_gene   | ARHGAP9  |
| no_gene   | CDC20B   |
| GNAO1     | RPGRIP1L |
| GNAO1     | RPGRIP1L |
| WIBG      | no_gene  |
| DGKA      | BEST3    |
| DGKA      | BEST3    |
| DGKA      | no_gene  |
| DGKA      | no_gene  |
| DGKA      | no_gene  |



|         |              |
|---------|--------------|
| CDK2    | no_gene      |
| RAB5B   | DIP2B        |
| SUOX    | PIP4K2C      |
| SUOX    | PIP4K2C      |
| no_gene | no_gene      |
| IKZF4   | no_gene      |
| IKZF4   | KIF5A        |
| IKZF4   | PIP4K2C      |
| IKZF4   | FAM186B      |
| no_gene | no_gene      |
| IKZF4   | no_gene      |
| RPS26   | no_gene      |
| RPS26   | no_gene      |
| no_gene | no_gene      |
| no_gene | STX1A        |
| no_gene | no_gene      |
| MYL6    | BEST3        |
| MYL6    | LIMA1        |
| MYL6B   | BEST3        |
| MYL6    | LIMA1        |
| MYL6    | LOC100287944 |
| MYL6    | CCNT1        |
| SMARCC2 | NOL4         |
| SMARCC2 | RIC8B        |
| no_gene | KIAA0020     |
| no_gene | KIAA0020     |
| no_gene | no_gene      |
| ANKRD52 | LOC100287944 |
| ANKRD52 | no_gene      |
| ANKRD52 | LOC100287944 |
| no_gene | no_gene      |
| no_gene | ZNF267       |
| no_gene | no_gene      |
| GLS2    | NOL4         |

|             |              |
|-------------|--------------|
| no_gene     | DIAPH2       |
| GLS2        | LOC100287944 |
| BEND6       | MRPL30       |
| LYN         | IMPAD1       |
| LYN         | IMPAD1       |
| RBMS2       | DTNA         |
| no_gene     | no_gene      |
| no_gene     | no_gene      |
| RBMS2       | no_gene      |
| RBMS2       | no_gene      |
| RBMS2       | DTNA         |
| no_gene     | no_gene      |
| ZNF280D     | no_gene      |
| no_gene     | ATP7B        |
| BAZ2A       | no_gene      |
| BAZ2A       | no_gene      |
| no_gene     | no_gene      |
| no_gene     | ZNF280D      |
| no_gene     | no_gene      |
| no_gene     | no_gene      |
| no_gene     | no_gene      |
| APCDD1L-AS1 | no_gene      |
| APCDD1L-AS1 | no_gene      |
| APCDD1L-AS1 | no_gene      |
| no_gene     | no_gene      |
| APCDD1L-AS1 | no_gene      |
| APCDD1L-AS1 | no_gene      |
| no_gene     | BCAR3        |
| APCDD1L-AS1 | no_gene      |
| APCDD1L-AS1 | no_gene      |
| no_gene     | no_gene      |
| no_gene     | FAM186B      |
| no_gene     | SHMT2        |
| PRIM2       | SAMD12       |
| no_gene     | FAIM2        |
| ZBTB39      | no_gene      |
| C8B         | no_gene      |
| no_gene     | CNTNAP2      |
| PRIM2       | no_gene      |
| POLR2C      | no_gene      |
| no_gene     | PRIM2        |

|           |          |
|-----------|----------|
| no_gene   | ZNF609   |
| no_gene   | no_gene  |
| no_gene   | GUSBP1   |
| NXPH4     | METTL1   |
| NXPH4     | METTL1   |
| NXPH4     | FAM186B  |
| NXPH4     | FAM186B  |
| SHMT2     | no_gene  |
| SHMT2     | no_gene  |
| SHMT2     | no_gene  |
| no_gene   | no_gene  |
| ZNF460    | ZNF543   |
| no_gene   | GUCA1A   |
| no_gene   | no_gene  |
| ZNF543    | ZNF460   |
| ARHGAP9   | no_gene  |
| ARHGAP9   | no_gene  |
| ARHGAP9   | no_gene  |
| no_gene   | no_gene  |
| IMPAD1    | LYN      |
| IMPAD1    | LYN      |
| no_gene   | no_gene  |
| MARS      | GOLGA6L1 |
| MARS      | GOLGA6L1 |
| MARS      | GOLGA6L1 |
| no_gene   | no_gene  |
| no_gene   | no_gene  |
| RAB3C     | no_gene  |
| RAB3C     | no_gene  |
| no_gene   | no_gene  |
| KIF5A     | FAM186B  |
| KIF5A     | IKZF4    |
| PIP4K2C   | SUOX     |
| PIP4K2C   | IKZF4    |
| PIP4K2C   | FAM186B  |
| PIP4K2C   | SUOX     |
| ARHGEF25  | no_gene  |
| SLC26A10  | no_gene  |
| LOC255130 | no_gene  |
| no_gene   | no_gene  |
| OS9       | no_gene  |

|           |              |
|-----------|--------------|
| OS9       | no_gene      |
| no_gene   | no_gene      |
| TSPAN31   | SPATS2       |
| TSPAN31   | SPATS2       |
| TSPAN31   | SENP1        |
| TSPAN31   | SENP1        |
| CDK4      | MCRS1        |
| no_gene   | no_gene      |
| ZNF211    | no_gene      |
| METTL1    | NXPH4        |
| METTL1    | NXPH4        |
| SLC35F4   | no_gene      |
| SLC35F4   | no_gene      |
| no_gene   | no_gene      |
| AVIL      | FAM19A2      |
| AVIL      | no_gene      |
| AVIL      | FAM19A2      |
| no_gene   | TBC1D3P2     |
| AVIL      | SOAT2        |
| CTDSP2    | TRIP13       |
| CTDSP2    | TRIP13       |
| no_gene   | no_gene      |
| ZNF587    | no_gene      |
| no_gene   | ZNF680       |
| no_gene   | no_gene      |
| no_gene   | MCRS1        |
| no_gene   | MCRS1        |
| no_gene   | ETF1         |
| ZNF606    | no_gene      |
| no_gene   | RPRD1A       |
| no_gene   | FAM19A2      |
| no_gene   | BTBD11       |
| no_gene   | no_gene      |
| no_gene   | LOC100505495 |
| no_gene   | no_gene      |
| no_gene   | MAD1L1       |
| no_gene   | RNF216       |
| no_gene   | no_gene      |
| LIPC      | LIPC         |
| LIPC      | LIPC         |
| LOC284757 | FLJ35024     |



|          |         |
|----------|---------|
| no_gene  | ABCG2   |
| PDE4D    | PDE4D   |
| no_gene  | no_gene |
| no_gene  | FAM19A2 |
| no_gene  | no_gene |
| no_gene  | FAM19A2 |
| PDE4D    | PDE4D   |
| PIGN     | PIGN    |
| no_gene  | no_gene |
| no_gene  | no_gene |
| PIGN     | PIGN    |
| TOX      | no_gene |
| CDH4     | ARFGAP1 |
| no_gene  | no_gene |
| MS4A2    | no_gene |
| no_gene  | no_gene |
| no_gene  | no_gene |
| no_gene  | no_gene |
| DEPDC1B  | no_gene |
| DEPDC1B  | no_gene |
| CDH4     | CASS4   |
| FGGY     | FGGY    |
| FGGY     | FGGY    |
| CDH4     | TAF4    |
| CDH4     | no_gene |
| no_gene  | ASIC1   |
| no_gene  | no_gene |
| no_gene  | TBC1D30 |
| no_gene  | TBC1D30 |
| no_gene  | no_gene |
| CDH4     | CDH4    |
| no_gene  | CD63    |
| no_gene  | no_gene |
| CDH4     | CDH4    |
| no_gene  | no_gene |
| no_gene  | no_gene |
| TBC1D3P2 | no_gene |
| no_gene  | LRRC9   |
| no_gene  | no_gene |
| LRRC9    | no_gene |
| no_gene  | FAM19A2 |

|         |          |
|---------|----------|
| no_gene | XPOT     |
| no_gene | CNTNAP5  |
| no_gene | no_gene  |
| CDH4    | KIAA1045 |
| CDH4    | KIAA1045 |
| no_gene | no_gene  |
| TAF4    | CDH4     |
| no_gene | no_gene  |
| no_gene | no_gene  |
| no_gene | ARSG     |
| ZSWIM6  | RAB3C    |
| ZSWIM6  | RAB3C    |
| no_gene | no_gene  |
| no_gene | no_gene  |
| no_gene | WIBG     |
| no_gene | no_gene  |
| no_gene | no_gene  |
| FHIT    | FHIT     |
| FHIT    | FHIT     |
| no_gene | no_gene  |
| BCL2    | IL18     |
| BCL2    | IL18     |
| no_gene | no_gene  |
| MIR548W | MIR548W  |
| MIR548W | MIR548W  |
| no_gene | no_gene  |
| MIR548W | MIR548W  |
| MIR548W | MIR548W  |
| no_gene | no_gene  |
| REL     | PUS10    |
| REL     | CNTNAP5  |
| no_gene | ATP6V0E1 |
| PUS10   | CNTNAP5  |
| PUS10   | REL      |
| no_gene | no_gene  |
| no_gene | WIF1     |
| no_gene | no_gene  |
| no_gene | no_gene  |
| no_gene | HBZ      |
| no_gene | no_gene  |
| no_gene | no_gene  |

|           |           |
|-----------|-----------|
| no_gene   | no_gene   |
| no_gene   | IRAK3     |
| no_gene   | IRAK3     |
| no_gene   | ZFC3H1    |
| no_gene   | ZFC3H1    |
| RORA      | no_gene   |
| RORA      | no_gene   |
| no_gene   | no_gene   |
| no_gene   | no_gene   |
| no_gene   | PPM1H     |
| no_gene   | PPM1H     |
| no_gene   | CDK2      |
| no_gene   | no_gene   |
| no_gene   | ACE       |
| no_gene   | no_gene   |
| no_gene   | MON2      |
| no_gene   | MON2      |
| no_gene   | no_gene   |
| no_gene   | no_gene   |
| no_gene   | no_gene   |
| no_gene   | GRIP1     |
| ACE       | no_gene   |
| CHD7      | no_gene   |
| no_gene   | KIAA1217  |
| no_gene   | KIAA1217  |
| no_gene   | INO80     |
| no_gene   | no_gene   |
| SERPINB8  | no_gene   |
| no_gene   | ICOS      |
| no_gene   | NUP107    |
| no_gene   | SERPINB8  |
| no_gene   | no_gene   |
| no_gene   | no_gene   |
| no_gene   | no_gene   |
| no_gene   | PLD5      |
| no_gene   | no_gene   |
| no_gene   | no_gene   |
| no_gene   | no_gene   |
| no_gene   | IKZF1     |
| ARFGAP1   | no_gene   |
| ARFGAP1   | CDH4      |
| LOC284294 | LOC284294 |
| no_gene   | no_gene   |
| no_gene   | no_gene   |



|           |           |
|-----------|-----------|
| ANK3      | ANK3      |
| no_gene   | no_gene   |
| LOC284294 | LOC284294 |
| no_gene   | no_gene   |
| no_gene   | no_gene   |
| ANK3      | ANK3      |
| no_gene   | no_gene   |
| CDH8      | no_gene   |
| no_gene   | no_gene   |
| no_gene   | no_gene   |
| no_gene   | no_gene   |
| FAM19A2   | C12orf54  |
| FAM19A2   | FAM19A2   |
| no_gene   | ZBTB40    |
| no_gene   | ZBTB40    |
| no_gene   | no_gene   |
| FAM19A2   | no_gene   |
| HIF1A     | CDKN2A    |
| FAM19A2   | no_gene   |
| FAM19A2   | TUBA1B    |
| FAM19A2   | no_gene   |
| FAM19A2   | no_gene   |
| FAM19A2   | FAM19A2   |
| FAM19A2   | no_gene   |
| FAM19A2   | no_gene   |
| FAM19A2   | no_gene   |
| FAM19A2   | AVIL      |
| FAM19A2   | AVIL      |
| no_gene   | no_gene   |
| no_gene   | no_gene   |
| no_gene   | CYP19A1   |
| no_gene   | no_gene   |
| no_gene   | GOLGA6B   |
| FAM19A2   | no_gene   |
| no_gene   | LOC645752 |
| no_gene   | GOLGA6L1  |
| no_gene   | PAIP2B    |

|         |         |
|---------|---------|
| no_gene | PAIP2B  |
| no_gene | no_gene |
| FAM19A2 | no_gene |
| FAM19A2 | no_gene |
| FAM19A2 | no_gene |
| no_gene | CYP19A1 |
| no_gene | no_gene |
| USP15   | IRAK3   |
| USP15   | IRAK3   |
| L1TD1   | FGF14   |
| no_gene | no_gene |
| no_gene | no_gene |
| USP15   | no_gene |
| USP15   | no_gene |
| LPHN3   | LPHN3   |
| no_gene | no_gene |
| no_gene | MIR3142 |
| LPHN3   | LPHN3   |
| no_gene | no_gene |
| no_gene | OSBPL8  |
| no_gene | no_gene |
| no_gene | no_gene |
| no_gene | RAB3C   |
| no_gene | no_gene |
| no_gene | no_gene |
| no_gene | no_gene |
| MON2    | no_gene |
| MON2    | no_gene |
| MON2    | DIP2B   |
| MON2    | DIP2B   |
| no_gene | no_gene |
| PPM1H   | no_gene |
| PPM1H   | no_gene |
| PPM1H   | LIMA1   |
| PPM1H   | no_gene |
| PPM1H   | DNAJC22 |

|           |           |
|-----------|-----------|
| no_gene   | TMEM241   |
| no_gene   | no_gene   |
| DOCK7     | DOCK7     |
| DOCK7     | DOCK7     |
| no_gene   | no_gene   |
| no_gene   | TMEM242   |
| C10orf107 | C10orf107 |
| KCNH5     | KCNH5     |
| NKAIN3    | NKAIN3    |
| KCNH5     | KCNH5     |
| C10orf107 | C10orf107 |
| no_gene   | no_gene   |
| no_gene   | no_gene   |
| NKAIN3    | NKAIN3    |
| no_gene   | THAP2     |
| no_gene   | THAP2     |
| no_gene   | no_gene   |
| no_gene   | no_gene   |
| no_gene   | no_gene   |
| MTMR8     | MTMR8     |
| no_gene   | NKD2      |
| no_gene   | NKD2      |
| no_gene   | PTPRR     |
| MTMR8     | MTMR8     |
| no_gene   | no_gene   |
| RCOR2     | no_gene   |
| no_gene   | no_gene   |
| WDPCP     | WDPCP     |
| LINC00466 | LINC00466 |
| ARID5B    | ARID5B    |
| no_gene   | no_gene   |
| LINC00466 | LINC00466 |
| no_gene   | no_gene   |

|         |          |
|---------|----------|
| WDPCP   | WDPCP    |
| ARID5B  | ARID5B   |
| no_gene | no_gene  |
| no_gene | CREB5    |
| no_gene | CREB5    |
| no_gene | CREB5    |
| no_gene | no_gene  |
| no_gene | CPSF6    |
| no_gene | CPSF6    |
| no_gene | no_gene  |
| DPY19L2 | no_gene  |
| DPY19L2 | RPSAP52  |
| DPY19L2 | RPSAP52  |
| ZNF680  | no_gene  |
| no_gene | CRAMP1L  |
| no_gene | CRAMP1L  |
| no_gene | no_gene  |
| no_gene | no_gene  |
| no_gene | no_gene  |
| CEP112  | CEP112   |
| CEP112  | CEP112   |
| no_gene | no_gene  |
| no_gene | no_gene  |
| no_gene | IQCE     |
| no_gene | no_gene  |
| SRGAP1  | GPHN     |
| SRGAP1  | no_gene  |
| SRGAP1  | no_gene  |
| SRGAP1  | no_gene  |
| SRGAP1  | C12orf66 |
| SRGAP1  | C12orf66 |
| SRGAP1  | WHAMMP3  |
| SRGAP1  | WHAMMP3  |
| SRGAP1  | no_gene  |
| SRGAP1  | no_gene  |
| SRGAP1  | SRGAP1   |
| SRGAP1  | SRGAP1   |
| SRGAP1  | no_gene  |
| ADAMTS6 | no_gene  |
| ADAMTS6 | no_gene  |

|          |           |
|----------|-----------|
| ADAMTS6  | no_gene   |
| ADAMTS6  | no_gene   |
| ADAMTS6  | no_gene   |
| no_gene  | no_gene   |
| CSNK1G1  | SERPINA12 |
| CSNK1G1  | SERPINA12 |
| SRGAP1   | no_gene   |
| SRGAP1   | C1QL4     |
| no_gene  | no_gene   |
| no_gene  | no_gene   |
| no_gene  | ANKRD26P1 |
| ADAMTS9  | ADAMTS9   |
| ADAMTS9  | ADAMTS9   |
| C12orf66 | SRGAP1    |
| C12orf66 | SRGAP1    |
| no_gene  | no_gene   |
| ADAMTS9  | MIR548A2  |
| ADAMTS9  | ADAMTS9   |
| ADAMTS9  | ADAMTS9   |
| ADAMTS6  | no_gene   |
| no_gene  | no_gene   |
| SYNE2    | SYNE2     |
| no_gene  | ACSS3     |
| SYNE2    | SYNE2     |
| no_gene  | no_gene   |
| no_gene  | no_gene   |
| C12orf56 | no_gene   |
| EYS      | no_gene   |
| EYS      | no_gene   |
| MIR548A2 | ADAMTS9   |
| no_gene  | no_gene   |
| no_gene  | no_gene   |
| no_gene  | no_gene   |
| XPOT     | FAM19A2   |
| no_gene  | no_gene   |
| XPOT     | FAM19A2   |
| ZNF609   | no_gene   |
| XPOT     | ENKUR     |
| XPOT     | ENKUR     |
| EYS      | OPCML     |
| TBK1     | no_gene   |

|           |           |
|-----------|-----------|
| TBK1      | no_gene   |
| CACNG5    | no_gene   |
| no_gene   | CDH20     |
| no_gene   | CACNG5    |
| no_gene   | no_gene   |
| no_gene   | CALCOCO1  |
| RASSF3    | FOXK1     |
| RASSF3    | FOXK1     |
| no_gene   | no_gene   |
| no_gene   | no_gene   |
| no_gene   | no_gene   |
| PIF1      | FEM1B     |
| GNS       | FLJ41278  |
| GNS       | FLJ41278  |
| no_gene   | CNTNAP2   |
| no_gene   | no_gene   |
| no_gene   | ZNF718    |
| no_gene   | no_gene   |
| no_gene   | IRAK3     |
| no_gene   | IRAK3     |
| TBC1D30   | no_gene   |
| TBC1D30   | no_gene   |
| no_gene   | LOC283867 |
| no_gene   | no_gene   |
| no_gene   | no_gene   |
| FLJ41278  | PTPRR     |
| FLJ41278  | PTPRR     |
| no_gene   | no_gene   |
| no_gene   | MAGI1     |
| FLJ41278  | GNS       |
| FLJ41278  | GNS       |
| MAGI1     | no_gene   |
| HEPH      | LOC285626 |
| WIF1      | no_gene   |
| no_gene   | PREX2     |
| no_gene   | DGKA      |
| no_gene   | DGKA      |
| no_gene   | no_gene   |
| no_gene   | SPATA31A2 |
| LOC283867 | no_gene   |

|           |           |
|-----------|-----------|
| no_gene   | ELMO1     |
| no_gene   | ELMO1     |
| EYS       | EYS       |
| no_gene   | no_gene   |
| MSRB3     | HMGA2     |
| MSRB3     | HMGA2     |
| CYP7B1    | PXDNL     |
| MSRB3     | CPM       |
| MSRB3     | CPM       |
| EYS       | EYS       |
| EYS       | no_gene   |
| EYS       | no_gene   |
| MSRB3     | MSRB3     |
| MSRB3     | no_gene   |
| no_gene   | no_gene   |
| DNAJC6    | DNAJC6    |
| MSRB3     | MSRB3     |
| MSRB3     | no_gene   |
| MSRB3     | no_gene   |
| DNAJC6    | DNAJC6    |
| LINC00174 | no_gene   |
| LINC00174 | no_gene   |
| LINC00174 | no_gene   |
| MSRB3     | no_gene   |
| MSRB3     | no_gene   |
| no_gene   | no_gene   |
| EYS       | EYS       |
| no_gene   | GLI3      |
| no_gene   | no_gene   |
| EYS       | EYS       |
| no_gene   | MSRB3     |
| no_gene   | no_gene   |
| no_gene   | no_gene   |
| no_gene   | no_gene   |
| SLC25A26  | SLC25A26  |
| SLC29A2   | no_gene   |
| SLC29A2   | no_gene   |
| SLC25A26  | SLC25A26  |
| no_gene   | no_gene   |
| RPSAP52   | DPY19L2P2 |
| RPSAP52   | DPY19L2   |

|          |           |
|----------|-----------|
| RPSAP52  | DPY19L2   |
| RPSAP52  | DPY19L2P1 |
| no_gene  | no_gene   |
| ARSG     | no_gene   |
| HMGA2    | no_gene   |
| HMGA2    | no_gene   |
| HMGA2    | MSRB3     |
| HMGA2    | MSRB3     |
| no_gene  | no_gene   |
| no_gene  | no_gene   |
| CDH5     | ARNT      |
| no_gene  | no_gene   |
| no_gene  | FAM19A2   |
| LLPH     | no_gene   |
| LLPH     | no_gene   |
| TMBIM4   | TMBIM4    |
| TMBIM4   | TMBIM4    |
| C11orf80 | COL11A1   |
| IRAK3    | USP15     |
| IRAK3    | USP15     |
| PC       | no_gene   |
| no_gene  | ARL15     |
| IRAK3    | no_gene   |
| no_gene  | FAM19A2   |
| no_gene  | FAM19A2   |
| no_gene  | no_gene   |
| GRIP1    | TPPP      |
| GRIP1    | TPPP      |
| no_gene  | no_gene   |
| no_gene  | EDA       |
| no_gene  | no_gene   |
| no_gene  | no_gene   |
| no_gene  | no_gene   |
| no_gene  | METTL9    |
| no_gene  | no_gene   |



|          |            |
|----------|------------|
| no_gene  | no_gene    |
| no_gene  | no_gene    |
| no_gene  | no_gene    |
| GRIP1    | MDM1       |
| GRIP1    | MDM1       |
| AR       | no_gene    |
| no_gene  | no_gene    |
| GRIP1    | no_gene    |
| no_gene  | AR         |
| GRIP1    | no_gene    |
| GRIP1    | CPM        |
| GRIP1    | CPM        |
| GRIP1    | IGF2BP3    |
| GRIP1    | no_gene    |
| no_gene  | no_gene    |
| CBFB     | no_gene    |
| no_gene  | LOC728613  |
| no_gene  | no_gene    |
| no_gene  | LOC728613  |
| no_gene  | no_gene    |
| SGIP1    | SGIP1      |
| no_gene  | MSRB3      |
| no_gene  | MSRB3      |
| PCDH9    | ENTPD1-AS1 |
| TBC1D10C | no_gene    |
| no_gene  | CACNA2D1   |
| no_gene  | no_gene    |
| no_gene  | no_gene    |
| SGIP1    | SGIP1      |
| no_gene  | no_gene    |
| no_gene  | no_gene    |
| no_gene  | no_gene    |

|         |            |
|---------|------------|
| no_gene | FAM221A    |
| no_gene | no_gene    |
| no_gene | OPHN1      |
| no_gene | MSRB3      |
| no_gene | MSRB3      |
| no_gene | no_gene    |
| no_gene | no_gene    |
| no_gene | HIVEP3     |
| OPHN1   | no_gene    |
| MIR4272 | CACNA2D3   |
| AQP7P1  | ANKRD20A8P |
| AQP7P1  | ANKRD20A3  |
| AQP7P1  | ANKRD20A3  |
| AQP7P1  | ANKRD20A8P |
| AQP7P1  | ANKRD20A3  |
| AQP7P1  | ANKRD20A3  |
| AQP7P1  | ANKRD20A8P |
| AQP7P1  | ANKRD20A3  |
| AQP7P1  | ANKRD20A3  |
| AQP7P1  | no_gene    |
| no_gene | no_gene    |
| GPHN    | ACSS3      |
| no_gene | no_gene    |
| GPHN    | GPHN       |
| no_gene | no_gene    |
| no_gene | no_gene    |
| DOC2GP  | no_gene    |
| GPHN    | SRGAP1     |
| no_gene | no_gene    |
| no_gene | CTNND2     |
| GPHN    | GPHN       |
| no_gene | no_gene    |
| no_gene | CCDC63     |
| no_gene | CCDC63     |
| no_gene | no_gene    |
| no_gene | no_gene    |
| no_gene | no_gene    |
| MAP2K6  | MIR5684    |

|           |         |
|-----------|---------|
| no_gene   | no_gene |
| no_gene   | no_gene |
| no_gene   | CEP72   |
| no_gene   | STK31   |
| no_gene   | no_gene |
| IQCH      | IQCH    |
| no_gene   | OS9     |
| no_gene   | OS9     |
| IQCH      | IQCH    |
| no_gene   | no_gene |
| no_gene   | no_gene |
| no_gene   | PTPRR   |
| no_gene   | PTPRR   |
| no_gene   | no_gene |
| no_gene   | no_gene |
| no_gene   | no_gene |
| FAM27B    | no_gene |
| no_gene   | no_gene |
| no_gene   | no_gene |
| no_gene   | TRIP13  |
| no_gene   | TRIP13  |
| no_gene   | TPPP    |
| no_gene   | TPPP    |
| no_gene   | no_gene |
| no_gene   | no_gene |
| STARD8    | no_gene |
| no_gene   | no_gene |
| ANKRD20A1 | no_gene |
| no_gene   | no_gene |
| no_gene   | USP15   |
| no_gene   | SPATS2  |
| no_gene   | USP15   |
| no_gene   | no_gene |
| no_gene   | LIMA1   |
| no_gene   | TMCO5B  |
| DYRK2     | no_gene |
| no_gene   | PCSK2   |
| no_gene   | RNU6-6  |
| no_gene   | no_gene |
| no_gene   | no_gene |

|         |         |
|---------|---------|
| no_gene | RNU6-6  |
| no_gene | no_gene |
| no_gene | no_gene |
| no_gene | no_gene |
| no_gene | ADAMTS3 |
| FAM19A1 | FAM19A1 |
| no_gene | FAIM2   |
| no_gene | FAIM2   |
| no_gene | no_gene |
| FAM19A1 | FAM19A1 |
| no_gene | GRIP1   |
| NFATC3  | ZBTB40  |
| no_gene | KCNQ5   |
| no_gene | KCNQ5   |
| no_gene | no_gene |
| no_gene | no_gene |
| no_gene | GAN     |
| no_gene | GLCCI1  |
| no_gene | GLCCI1  |
| no_gene | BRAT1   |
| no_gene | BRAT1   |
| no_gene | no_gene |
| no_gene | no_gene |
| PPP6R3  | no_gene |
| no_gene | no_gene |
| no_gene | PFKM    |
| no_gene | PFKM    |
| no_gene | no_gene |
| no_gene | no_gene |
| no_gene | CEP72   |
| no_gene | CEP72   |
| no_gene | MEIS2   |
| no_gene | no_gene |

|           |           |
|-----------|-----------|
| IFNG      | no_gene   |
| IFNG      | no_gene   |
| no_gene   | CPSF6     |
| no_gene   | CPSF6     |
| LOC550112 | GNRHR     |
| FEM1B     | PIF1      |
| FEM1B     | no_gene   |
| FEM1B     | no_gene   |
| no_gene   | LOC441204 |
| no_gene   | SLC2A13   |
| RAD51B    | RAD51B    |
| GNRHR     | LOC550112 |
| IL26      | no_gene   |
| IL26      | no_gene   |
| RAD51B    | RAD51B    |
| IL22      | C10orf68  |
| IL22      | C10orf68  |
| IL22      | no_gene   |
| no_gene   | no_gene   |
| no_gene   | no_gene   |
| no_gene   | SRGAP1    |
| no_gene   | SRGAP1    |
| no_gene   | no_gene   |
| MDM1      | GRIP1     |
| MDM1      | GRIP1     |
| no_gene   | FNDC1     |
| RAD51B    | RAD51B    |
| no_gene   | NPSR1-AS1 |
| no_gene   | DNAH11    |
| no_gene   | DNAH11    |
| no_gene   | no_gene   |
| no_gene   | ANKRD52   |
| no_gene   | no_gene   |
| RAD51B    | RAD51B    |
| no_gene   | no_gene   |

|             |           |
|-------------|-----------|
| no_gene     | no_gene   |
| no_gene     | IL26      |
| no_gene     | IL26      |
| no_gene     | NA        |
| no_gene     | no_gene   |
| EDA         | no_gene   |
| LOC10027221 | GGTLC1    |
| no_gene     | no_gene   |
| no_gene     | ZNF678    |
| no_gene     | OR2W3     |
| no_gene     | no_gene   |
| no_gene     | no_gene   |
| no_gene     | no_gene   |
| no_gene     | C1orf186  |
| no_gene     | no_gene   |
| no_gene     | no_gene   |
| no_gene     | MS4A2     |
| no_gene     | no_gene   |
| no_gene     | RPSA      |
| no_gene     | RORA      |
| no_gene     | no_gene   |
| RAP1B       | no_gene   |
| PREX2       | no_gene   |
| LOC10050725 | FAM19A2   |
| LOC10050725 | FAM19A2   |
| NUP107      | no_gene   |
| LOC10050725 | C14orf183 |
| NUP107      | no_gene   |
| NUP107      | no_gene   |
| no_gene     | SMA4      |
| NUP107      | CNTNAP2   |
| NUP107      | CNTNAP2   |
| CTNNA3      | CTNNA3    |
| no_gene     | no_gene   |
| no_gene     | no_gene   |

|         |              |
|---------|--------------|
| AUTS2   | AUTS2        |
| PGM5P2  | NPSR1-AS1    |
| CTNNA3  | CTNNA3       |
| AUTS2   | AUTS2        |
| no_gene | SLC6A3       |
| no_gene | no_gene      |
| no_gene | no_gene      |
| no_gene | no_gene      |
| no_gene | LOC100505495 |
| MDM2    | CPM          |
| no_gene | no_gene      |
| CPM     | MDM2         |
| CPM     | no_gene      |
| CPM     | no_gene      |
| no_gene | no_gene      |
| CPM     | GRIP1        |
| CPM     | GRIP1        |
| CPM     | no_gene      |
| CPM     | no_gene      |
| CPM     | MSRB3        |
| CPM     | MSRB3        |
| CPM     | no_gene      |
| no_gene | no_gene      |
| no_gene | no_gene      |
| no_gene | GTF2H2       |
| TERF2   | no_gene      |
| TERF2   | no_gene      |
| no_gene | no_gene      |
| no_gene | no_gene      |
| no_gene | no_gene      |
| CTNNA3  | no_gene      |
| SMA4    | no_gene      |
| CYB5B   | no_gene      |
| CYB5B   | no_gene      |
| no_gene | SRGAP1       |
| no_gene | C10orf68     |

|         |              |
|---------|--------------|
| no_gene | CEP72        |
| no_gene | CEP72        |
| no_gene | CNOT2        |
| no_gene | CNOT2        |
| no_gene | CEP72        |
| no_gene | no_gene      |
| no_gene | MIR4456      |
| no_gene | MIR4456      |
| no_gene | no_gene      |
| no_gene | RAB3IP       |
| no_gene | no_gene      |
| no_gene | no_gene      |
| no_gene | WIF1         |
| no_gene | WIF1         |
| no_gene | ATF1         |
| no_gene | no_gene      |
| no_gene | no_gene      |
| CPSF6   | no_gene      |
| no_gene | FRS2         |
| no_gene | CPM          |
| no_gene | YEATS4       |
| no_gene | no_gene      |
| no_gene | no_gene      |
| no_gene | no_gene      |
| NFAT5   | PRKCZ        |
| NFAT5   | PRKCZ        |
| no_gene | no_gene      |
| LYZ     | no_gene      |
| LYZ     | no_gene      |
| AUTS2   | LOC100287944 |
| YEATS4  | no_gene      |
| no_gene | no_gene      |
| YEATS4  | SLC12A7      |
| no_gene | no_gene      |
| no_gene | no_gene      |
| FRS2    | no_gene      |
| FRS2    | no_gene      |
| FRS2    | no_gene      |
| no_gene | no_gene      |
| no_gene | no_gene      |



|             |              |
|-------------|--------------|
| no_gene     | no_gene      |
| LOC10050571 | TRPA1        |
| no_gene     | no_gene      |
| LOC10050571 | LOC100505718 |
| CCT2        | no_gene      |
| CCT2        | BRD9         |
| CCT2        | no_gene      |
| CCT2        | BRD9         |
| LOC10050571 | LOC100505718 |
| PDXDC2P     | MIR3180-1    |
| PDXDC2P     | MIR3180-1    |
| BEST3       | MYL6         |
| BEST3       | MYL6B        |
| BEST3       | DGKA         |
| BEST3       | DGKA         |
| BEST3       | FLJ12825     |
| no_gene     | no_gene      |
| RAB3IP      | no_gene      |
| RAB3IP      | RAB3IP       |
| RAB3IP      | no_gene      |
| RAB3IP      | RAB3IP       |
| no_gene     | CPM          |
| no_gene     | CPM          |
| no_gene     | GRIP1        |
| no_gene     | GRIP1        |
| no_gene     | SLC6A3       |
| no_gene     | no_gene      |
| no_gene     | WIF1         |
| no_gene     | no_gene      |
| no_gene     | no_gene      |
| no_gene     | no_gene      |
| no_gene     | WIF1         |

|         |          |
|---------|----------|
| no_gene | no_gene  |
| no_gene | no_gene  |
| no_gene | no_gene  |
| no_gene | ANKH     |
| no_gene | ANKH     |
| GTF2H2  | no_gene  |
| no_gene | LMBRD1   |
| no_gene | 11-Mar   |
| no_gene | 11-Mar   |
| no_gene | PLEKHA7  |
| no_gene | PLEKHA7  |
| LMBRD1  | no_gene  |
| CBWD3   | CBWD1    |
| no_gene | no_gene  |
| no_gene | no_gene  |
| no_gene | RAB3IP   |
| no_gene | no_gene  |
| no_gene | no_gene  |
| no_gene | LLPH     |
| no_gene | no_gene  |
| COL19A1 | no_gene  |
| no_gene | no_gene  |
| CNOT2   | no_gene  |
| CNOT2   | no_gene  |
| no_gene | C2orf27B |
| CNOT2   | no_gene  |
| CNOT2   | no_gene  |
| BCYRN1  | TMEM131  |
| CNOT2   | no_gene  |
| CNOT2   | no_gene  |
| CNOT2   | TPPP     |
| KCNMB4  | PLEKHA7  |
| KCNMB4  | PLEKHA7  |
| no_gene | no_gene  |
| no_gene | no_gene  |
| CBWD3   | no_gene  |
| no_gene | no_gene  |
| CBWD3   | no_gene  |
| PTPRB   | no_gene  |
| PTPRB   | TRIP13   |
| PTPRB   | TRIP13   |
| PTPRB   | SLC12A7  |
| PTPRB   | SLC12A7  |
| PTPRB   | PTPRR    |

|         |          |
|---------|----------|
| PTPRR   | PTPRB    |
| PTPRR   | no_gene  |
| PTPRR   | no_gene  |
| NCOA2   | no_gene  |
| NCOA2   | no_gene  |
| PTPRR   | CCNT1    |
| PTPRR   | CCNT1    |
| NCOA2   | NCOA2    |
| PTPRR   | no_gene  |
| NCOA2   | NCOA2    |
| PTPRR   | ZDHHC11  |
| no_gene | ARHGEF28 |
| PTPRR   | no_gene  |
| PTPRR   | TPPP     |
| PTPRR   | no_gene  |
| NCOA2   | ADAMTS2  |
| no_gene | no_gene  |
| NCOA2   | ADAMTS2  |
| PTPRR   | TPPP     |
| PTPRR   | TPPP     |
| OR7E91P | NA       |
| PTPRR   | no_gene  |
| NCOA2   | ADAMTS2  |
| PTPRR   | no_gene  |
| PTPRR   | FLJ41278 |
| PTPRR   | NKD2     |
| PTPRR   | FLJ41278 |
| PTPRR   | NKD2     |
| PTPRR   | no_gene  |
| no_gene | KATNBL1  |
| no_gene | MTERFD1  |
| THSD4   | THSD4    |
| PAIP2B  | no_gene  |
| PAIP2B  | no_gene  |
| no_gene | no_gene  |

|          |              |
|----------|--------------|
| PAIP2B   | no_gene      |
| THSD4    | FMO1         |
| no_gene  | TERT         |
| THSD4    | THSD4        |
| no_gene  | TERT         |
| no_gene  | no_gene      |
| COL13A1  | COL13A1      |
| COL13A1  | COL13A1      |
| no_gene  | no_gene      |
| THSD4    | PIGK         |
| no_gene  | no_gene      |
| no_gene  | no_gene      |
| no_gene  | no_gene      |
| no_gene  | MPP6         |
| no_gene  | MPP6         |
| no_gene  | no_gene      |
| no_gene  | AGR3         |
| no_gene  | AGR3         |
| no_gene  | no_gene      |
| SAR1A    | no_gene      |
| FAM189A2 | no_gene      |
| no_gene  | OGFRL1       |
| no_gene  | no_gene      |
| NEGR1    | no_gene      |
| OGFRL1   | no_gene      |
| ZFC3H1   | LOC100507377 |
| ZFC3H1   | no_gene      |
| ZFC3H1   | no_gene      |
| THAP2    | no_gene      |
| THAP2    | no_gene      |
| TMEM19   | TRHDE        |
| TMEM19   | TRHDE        |
| no_gene  | no_gene      |
| no_gene  | DYRK2        |
| TNPO1    | no_gene      |
| no_gene  | no_gene      |

|             |              |
|-------------|--------------|
| TNPO1       | no_gene      |
| no_gene     | no_gene      |
| no_gene     | no_gene      |
| EYA1        | EYA1         |
| TBC1D15     | no_gene      |
| TBC1D15     | no_gene      |
| EYA1        | EYA1         |
| no_gene     | no_gene      |
| FCHO2       | IGF2R        |
| no_gene     | no_gene      |
| TPH2        | GAS2         |
| TPH2        | PIK3C2G      |
| no_gene     | no_gene      |
| no_gene     | ARHGEF7      |
| PKM         | no_gene      |
| no_gene     | no_gene      |
| PKM         | no_gene      |
| no_gene     | no_gene      |
| no_gene     | no_gene      |
| no_gene     | DPY19L2P1    |
| no_gene     | DPY19L2P1    |
| no_gene     | no_gene      |
| RIMS1       | no_gene      |
| RIMS1       | no_gene      |
| no_gene     | no_gene      |
| ARIH1       | NPTN         |
| no_gene     | no_gene      |
| LOC10013289 | LOC100132891 |
| ARIH1       | ARIH1        |
| LOC10013289 | LOC100132891 |
| ARIH1       | ARIH1        |
| TRHDE       | no_gene      |
| TRHDE       | no_gene      |
| no_gene     | no_gene      |
| TRHDE       | TMEM19       |
| TRHDE       | TMEM19       |
| no_gene     | no_gene      |
| GOLGA6B     | no_gene      |
| GOLGA6B     | no_gene      |
| GOLGA6B     | no_gene      |
| TRPA1       | no_gene      |
| TRPA1       | LOC100505718 |
| no_gene     | no_gene      |
| no_gene     | no_gene      |

|          |            |
|----------|------------|
| no_gene  | no_gene    |
| PPP4R2   | LOC728613  |
| PPP4R2   | LOC728613  |
| STX1A    | no_gene    |
| ARHGEF28 | no_gene    |
| DPF3     | DPF3       |
| DPF3     | DPF3       |
| no_gene  | no_gene    |
| no_gene  | SORT1      |
| DPF3     | DPF3       |
| DPF3     | DPF3       |
| no_gene  | LPHN2      |
| no_gene  | no_gene    |
| no_gene  | NEO1       |
| no_gene  | no_gene    |
| no_gene  | no_gene    |
| DPF3     | TMC2       |
| NEO1     | no_gene    |
| no_gene  | no_gene    |
| DPF3     | TMC2       |
| no_gene  | AMY2B      |
| no_gene  | no_gene    |
| no_gene  | CNOT2      |
| no_gene  | no_gene    |
| no_gene  | CNOT2      |
| no_gene  | no_gene    |
| ADAMTS3  | no_gene    |
| no_gene  | no_gene    |
| no_gene  | SLC2A13    |
| no_gene  | BCAR3      |
| no_gene  | ST6GALNAC3 |
| no_gene  | TRHDE      |
| no_gene  | TRHDE      |
| no_gene  | no_gene    |
| no_gene  | OTUD1      |
| no_gene  | OTUD1      |
| no_gene  | no_gene    |
| no_gene  | WDR63      |
| no_gene  | SCIN       |
| no_gene  | C1orf52    |
| no_gene  | no_gene    |
| KCNB2    | no_gene    |
| KCNQ5    | no_gene    |
| KCNQ5    | no_gene    |

|             |              |
|-------------|--------------|
| KCNB2       | no_gene      |
| KCNQ5       | ST8SIA1      |
| NPTN        | ARIH1        |
| no_gene     | DTWD2        |
| no_gene     | no_gene      |
| no_gene     | no_gene      |
| TERF1       | no_gene      |
| no_gene     | no_gene      |
| no_gene     | no_gene      |
| TERF1       | no_gene      |
| no_gene     | no_gene      |
| no_gene     | no_gene      |
| no_gene     | LOC100130301 |
| LOC10013030 | no_gene      |
| DGUOK       | DGUOK        |
| DGUOK       | DGUOK        |
| no_gene     | FNBP1L       |
| no_gene     | AK5          |
| no_gene     | ZNF326       |
| no_gene     | PRKACB       |
| no_gene     | SDHAP3       |
| no_gene     | SDHAP3       |
| no_gene     | no_gene      |
| no_gene     | CPNE8        |
| no_gene     | no_gene      |
| no_gene     | PTBP2        |
| no_gene     | LPPR5        |
| no_gene     | no_gene      |
| no_gene     | COL11A1      |
| no_gene     | no_gene      |
| no_gene     | no_gene      |
| no_gene     | no_gene      |
| no_gene     | NTNG1        |
| no_gene     | no_gene      |
| no_gene     | NA           |
| no_gene     | NA           |
| no_gene     | no_gene      |
| no_gene     | MSH4         |
| no_gene     | NTNG1        |
| KLF12       | KLF12        |
| no_gene     | no_gene      |
| no_gene     | no_gene      |
| KLF12       | KLF12        |
| no_gene     | no_gene      |

|             |              |
|-------------|--------------|
| RASSF6      | no_gene      |
| LRRIQ3      | DDAH1        |
| CD109       | CD109        |
| LRRIQ3      | no_gene      |
| LRRIQ3      | ACADM        |
| LRRIQ3      | AK5          |
| no_gene     | RASSF6       |
| LRRIQ3      | no_gene      |
| LOC10050737 | NAV2         |
| LOC10050737 | NAV2         |
| CD109       | CD109        |
| LRRIQ3      | SAMD13       |
| LRRIQ3      | VAV3         |
| LRRIQ3      | no_gene      |
| LRRIQ3      | no_gene      |
| KLF12       | KLF12        |
| KLF12       | KLF12        |
| LRRIQ3      | no_gene      |
| LOC10050737 | no_gene      |
| LOC10050737 | no_gene      |
| FPGT-TNNI3K | no_gene      |
| FPGT-TNNI3K | PIGK         |
| LOC10050737 | ZFC3H1       |
| FPGT-TNNI3K | no_gene      |
| FPGT-TNNI3K | FAM102B      |
| no_gene     | no_gene      |
| no_gene     | no_gene      |
| FPGT-TNNI3K | LOC100996307 |
| no_gene     | no_gene      |
| no_gene     | no_gene      |
| no_gene     | no_gene      |
| FPGT-TNNI3K | no_gene      |
| no_gene     | no_gene      |
| FPGT-TNNI3K | no_gene      |
| FPGT-TNNI3K | CLCA2        |
| FPGT-TNNI3K | no_gene      |
| no_gene     | no_gene      |
| FPGT-TNNI3K | no_gene      |
| no_gene     | ATG5         |
| no_gene     | no_gene      |
| no_gene     | no_gene      |



|           |              |
|-----------|--------------|
| no_gene   | no_gene      |
| no_gene   | no_gene      |
| CRYZ      | no_gene      |
| no_gene   | ATL1         |
| TYW3      | FAM69A       |
| no_gene   | HPSE2        |
| no_gene   | no_gene      |
| no_gene   | no_gene      |
| no_gene   | NIN          |
| no_gene   | MIR137HG     |
| no_gene   | CLCA4        |
| KCNC2     | no_gene      |
| KCNC2     | no_gene      |
| KCNC2     | no_gene      |
| no_gene   | EVI5         |
| TMC1      | no_gene      |
| TMEM170A  | no_gene      |
| no_gene   | no_gene      |
| no_gene   | no_gene      |
| no_gene   | DET1         |
| no_gene   | no_gene      |
| KCNC2     | no_gene      |
| no_gene   | BLK          |
| GOLGA6D   | no_gene      |
| GOLGA6D   | no_gene      |
| LHX8      | no_gene      |
| LHX8      | no_gene      |
| no_gene   | no_gene      |
| LHX8      | no_gene      |
| LHX8      | LOC100129620 |
| SLC44A5   | no_gene      |
| SLC44A5   | no_gene      |
| SLC44A5   | no_gene      |
| no_gene   | no_gene      |
| LOC401074 | no_gene      |
| no_gene   | no_gene      |
| PI15      | no_gene      |
| PI15      | no_gene      |
| SLC44A5   | no_gene      |
| no_gene   | NA           |

|             |            |
|-------------|------------|
| SLC44A5     | LPPR5      |
| SLC44A5     | no_gene    |
| no_gene     | no_gene    |
| DNM1P35     | GOLGA2     |
| DNM1P35     | DNM1       |
| SLC44A5     | MGC27382   |
| SLC44A5     | no_gene    |
| no_gene     | ST6GALNAC5 |
| no_gene     | no_gene    |
| no_gene     | no_gene    |
| no_gene     | no_gene    |
| TMC6        | no_gene    |
| no_gene     | no_gene    |
| no_gene     | no_gene    |
| no_gene     | KRT8       |
| ACADM       | LRRIQ3     |
| LOC10013309 | no_gene    |
| ACADM       | CLCA2      |
| no_gene     | no_gene    |
| MSH4        | no_gene    |
| no_gene     | no_gene    |
| MSH4        | no_gene    |
| MSH4        | no_gene    |
| MSH4        | DDAH1      |
| CNTNAP4     | no_gene    |
| ASB17       | no_gene    |
| no_gene     | KCNB2      |
| no_gene     | no_gene    |
| no_gene     | HS2ST1     |
| no_gene     | no_gene    |
| ST6GALNAC3  | ST6GALNAC3 |
| ST6GALNAC3  | no_gene    |
| no_gene     | no_gene    |
| no_gene     | SRGAP1     |
| no_gene     | SRGAP1     |
| no_gene     | no_gene    |
| no_gene     | no_gene    |
| ST6GALNAC3  | no_gene    |
| ST6GALNAC3  | CNN3       |
| ST6GALNAC3  | RNPC3      |
| ST6GALNAC3  | ST6GALNAC3 |
| ST6GALNAC3  | RPAP2      |
| no_gene     | no_gene    |
| ST6GALNAC3  | ST6GALNAC3 |

|            |              |
|------------|--------------|
| no_gene    | no_gene      |
| no_gene    | no_gene      |
| no_gene    | no_gene      |
| ATRX       | no_gene      |
| ST6GALNAC3 | no_gene      |
| ST6GALNAC3 | DDAH1        |
| ST6GALNAC3 | LOC100128787 |
| ST6GALNAC3 | HENMT1       |
| ST6GALNAC3 | ST6GALNAC3   |
| ATP9B      | ATP9B        |
| ST6GALNAC3 | PKN2         |
| ST6GALNAC3 | BCAR3        |
| ST6GALNAC3 | no_gene      |
| no_gene    | NPHP3-AS1    |
| ATP9B      | ATP9B        |
| SCAPER     | SCAPER       |
| SCAPER     | SCAPER       |
| ST6GALNAC3 | no_gene      |
| OSBPL8     | no_gene      |
| ST6GALNAC3 | no_gene      |
| no_gene    | no_gene      |
| ST6GALNAC3 | no_gene      |
| no_gene    | no_gene      |
| ST6GALNAC3 | CCBL2        |
| no_gene    | EXTL2        |
| no_gene    | no_gene      |
| no_gene    | SYT1         |
| no_gene    | no_gene      |
| no_gene    | KCNC2        |
| no_gene    | GABBR2       |
| ST6GALNAC5 | no_gene      |
| AP3B1      | no_gene      |
| ST6GALNAC5 | no_gene      |
| ST6GALNAC5 | LRRC8B       |
| ST6GALNAC5 | LOC100131564 |
| no_gene    | RMND1        |
| PIGK       | THSD4        |
| PIGK       | FPGT-TNNI3K  |
| PIGK       | no_gene      |
| PEAK1      | HMG20A       |
| MYCBP2     | MYCBP2       |
| HMG20A     | PEAK1        |
| MYCBP2     | MYCBP2       |
| TXNL4A     | UGT3A1       |

|           |           |
|-----------|-----------|
| AK5       | no_gene   |
| AK5       | no_gene   |
| AK5       | no_gene   |
| C10orf11  | C10orf11  |
| AK5       | NTNG1     |
| no_gene   | no_gene   |
| no_gene   | no_gene   |
| C10orf11  | C10orf11  |
| AK5       | CDC14A    |
| MAGI2     | MAGI2     |
| AK5       | no_gene   |
| AK5       | LRRIQ3    |
| AK5       | no_gene   |
| MAGI2     | MAGI2     |
| ZZZ3      | no_gene   |
| no_gene   | no_gene   |
| ZZZ3      | MGC27382  |
| MIR548H3  | MIR548H3  |
| no_gene   | no_gene   |
| ZZZ3      | no_gene   |
| MIR548H3  | MIR548H3  |
| no_gene   | no_gene   |
| no_gene   | no_gene   |
| no_gene   | LOC388152 |
| LOC645752 | no_gene   |
| DMGDH     | no_gene   |
| SLAIN1    | SLAIN1    |
| ADCK1     | ADCK1     |
| SLAIN1    | SLAIN1    |
| ADCK1     | ADCK1     |
| BHMT      | METTL21A  |
| no_gene   | AK5       |
| DNAJB4    | no_gene   |
| DNAJB4    | no_gene   |
| no_gene   | no_gene   |
| no_gene   | BTBD8     |
| no_gene   | STXBP3    |
| GIPC2     | GIPC2     |
| GIPC2     | GIPC2     |
| GIPC2     | GFI1      |
| EDNRB     | no_gene   |
| GIPC2     | no_gene   |
| GIPC2     | RPAP2     |
| no_gene   | TGFBR3    |

|           |            |
|-----------|------------|
| no_gene   | FAM102B    |
| MGC27382  | SLC44A5    |
| MGC27382  | ZZZ3       |
| MGC27382  | LOC729970  |
| MGC27382  | no_gene    |
| no_gene   | no_gene    |
| MGC27382  | NTNG1      |
| no_gene   | no_gene    |
| TENM4     | CSGALNACT1 |
| TENM4     | CSGALNACT1 |
| PTGFR     | no_gene    |
| MAGI2     | MAGI2      |
| PTGFR     | no_gene    |
| no_gene   | no_gene    |
| no_gene   | ELTD1      |
| MAGI2     | MAGI2      |
| no_gene   | GOLGA6D    |
| TENM4     | EPB41      |
| no_gene   | no_gene    |
| no_gene   | no_gene    |
| MAGI2-AS3 | CCZ1B      |
| no_gene   | no_gene    |
| no_gene   | WDR47      |
| no_gene   | AHCYL2     |
| no_gene   | no_gene    |
| no_gene   | no_gene    |
| SYT1      | no_gene    |
| ELTD1     | HFM1       |
| no_gene   | no_gene    |
| ELTD1     | no_gene    |
| no_gene   | no_gene    |
| ELTD1     | no_gene    |
| ELTD1     | no_gene    |
| no_gene   | no_gene    |
| no_gene   | TRPC5      |
| no_gene   | no_gene    |
| no_gene   | COL24A1    |
| no_gene   | NTNG1      |

|             |              |
|-------------|--------------|
| no_gene     | no_gene      |
| no_gene     | TGFBR3       |
| no_gene     | no_gene      |
| no_gene     | ABCA4        |
| no_gene     | no_gene      |
| no_gene     | LOC100505875 |
| LOC10050587 | no_gene      |
| DHFR        | HLA-B        |
| no_gene     | no_gene      |
| no_gene     | SORT1        |
| no_gene     | no_gene      |
| no_gene     | no_gene      |
| no_gene     | ADH5         |
| no_gene     | CELSR2       |
| CTNNA2      | CTNNA2       |
| no_gene     | no_gene      |
| no_gene     | no_gene      |
| CTNNA2      | CTNNA2       |
| LCA5        | DNAH11       |
| no_gene     | NTNG1        |
| no_gene     | no_gene      |
| no_gene     | no_gene      |
| no_gene     | DDAH1        |
| no_gene     | no_gene      |
| no_gene     | HS2ST1       |
| no_gene     | HS2ST1       |
| no_gene     | no_gene      |
| no_gene     | DIO2-AS1     |
| no_gene     | GDEP         |

|          |           |
|----------|-----------|
| DIO2-AS1 | no_gene   |
| OTOGL    | no_gene   |
| no_gene  | LPAR3     |
| no_gene  | no_gene   |
| GDEP     | no_gene   |
| no_gene  | no_gene   |
| no_gene  | TGFBR3    |
| no_gene  | no_gene   |
| BCKDHB   | BCKDHB    |
| no_gene  | no_gene   |
| MRPS28   | MRPS28    |
| ANTXR2   | ANTXR2    |
| BCKDHB   | BCKDHB    |
| no_gene  | no_gene   |
| MRPS28   | MRPS28    |
| ANTXR2   | ANTXR2    |
| no_gene  | no_gene   |
| no_gene  | DNASE2B   |
| no_gene  | LRRIQ3    |
| no_gene  | AK5       |
| no_gene  | no_gene   |
| no_gene  | LRRC8B    |
| no_gene  | LOC339524 |
| no_gene  | COL24A1   |
| no_gene  | no_gene   |
| C4orf22  | C4orf22   |
| CEP128   | CEP128    |
| no_gene  | no_gene   |
| C4orf22  | C4orf22   |
| GAN      | no_gene   |

|          |           |
|----------|-----------|
| CEP128   | CEP128    |
| no_gene  | no_gene   |
| no_gene  | SYT15     |
| ACSS3    | SRGAP1    |
| ACSS3    | SRGAP1    |
| no_gene  | LOC494141 |
| ACSS3    | no_gene   |
| no_gene  | NTNG1     |
| ZNF704   | no_gene   |
| no_gene  | no_gene   |
| C4orf22  | C4orf22   |
| C4orf22  | C4orf22   |
| no_gene  | no_gene   |
| no_gene  | SLC30A7   |
| no_gene  | no_gene   |
| no_gene  | PI15      |
| no_gene  | PI15      |
| CACNA2D1 | no_gene   |
| CACNA2D1 | no_gene   |
| CACNA2D1 | no_gene   |
| no_gene  | DDAH1     |
| no_gene  | no_gene   |
| no_gene  | MCOLN3    |
| no_gene  | no_gene   |
| no_gene  | MTF2      |
| no_gene  | no_gene   |
| no_gene  | C1orf180  |
| no_gene  | CSMD3     |
| no_gene  | no_gene   |
| no_gene  | no_gene   |
| no_gene  | no_gene   |
| LPHN2    | no_gene   |



|         |         |
|---------|---------|
| LPHN2   | no_gene |
| no_gene | no_gene |
| no_gene | PKM     |
| LPHN2   | no_gene |
| no_gene | no_gene |
| no_gene | no_gene |
| LPHN2   | no_gene |
| no_gene | EPHX2   |
| no_gene | no_gene |
| LPHN2   | no_gene |
| LPHN2   | no_gene |
| FABP9   | no_gene |
| LPHN2   | no_gene |
| SH2D4B  | no_gene |
| LPHN2   | no_gene |
| no_gene | SH2D4B  |
| no_gene | no_gene |
| LPHN2   | no_gene |
| LPHN2   | no_gene |
| LPHN2   | ODF2L   |
| no_gene | no_gene |
| FAM46A  | no_gene |
| XRCC4   | XRCC4   |
| no_gene | FAM46A  |
| XRCC4   | XRCC4   |
| no_gene | AK5     |
| no_gene | no_gene |
| no_gene | no_gene |
| no_gene | SYDE2   |
| no_gene | no_gene |
| no_gene | no_gene |
| no_gene | no_gene |
| no_gene | HSD11B1 |
| no_gene | LPAR3   |
| no_gene | no_gene |
| no_gene | LPPR5   |
| no_gene | no_gene |
| no_gene | no_gene |
| no_gene | no_gene |

|           |              |
|-----------|--------------|
| no_gene   | TERF1        |
| GOLGA6L10 | no_gene      |
| no_gene   | ELTD1        |
| no_gene   | no_gene      |
| no_gene   | DPYD         |
| no_gene   | HIAT1        |
| no_gene   | DDAH1        |
| LOC1720   | no_gene      |
| LOC1720   | no_gene      |
| no_gene   | no_gene      |
| no_gene   | no_gene      |
| no_gene   | NTNG1        |
| no_gene   | no_gene      |
| no_gene   | LOC729970    |
| TMTC2     | TMTC2        |
| TMTC2     | TMTC2        |
| no_gene   | no_gene      |
| TMTC2     | no_gene      |
| no_gene   | LPHN2        |
| no_gene   | LRRIQ3       |
| no_gene   | no_gene      |
| no_gene   | no_gene      |
| no_gene   | SUPT3H       |
| no_gene   | PRKACB       |
| no_gene   | no_gene      |
| no_gene   | LOC100133091 |
| no_gene   | WDR47        |
| no_gene   | LPHN2        |
| no_gene   | no_gene      |
| no_gene   | no_gene      |
| TMTC2     | no_gene      |
| no_gene   | LOC339524    |
| no_gene   | LPHN2        |
| no_gene   | TMTC2        |
| no_gene   | no_gene      |
| no_gene   | no_gene      |
| no_gene   | COL24A1      |
| SCD5      | SCD5         |
| SCD5      | SCD5         |
| no_gene   | no_gene      |

|          |           |
|----------|-----------|
| no_gene  | no_gene   |
| no_gene  | no_gene   |
| no_gene  | PRKACB    |
| no_gene  | no_gene   |
| no_gene  | CPSF6     |
| no_gene  | LYZ       |
| no_gene  | DPY19L2P1 |
| no_gene  | DPY19L2P2 |
| no_gene  | DPY19L2   |
| no_gene  | LYZ       |
| no_gene  | KIAA1324  |
| no_gene  | no_gene   |
| no_gene  | PRKACB    |
| no_gene  | DBT       |
| no_gene  | no_gene   |
| no_gene  | no_gene   |
| no_gene  | no_gene   |
| no_gene  | DPYD      |
| no_gene  | HENMT1    |
| no_gene  | no_gene   |
| no_gene  | no_gene   |
| ME1      | no_gene   |
| no_gene  | no_gene   |
| no_gene  | no_gene   |
| MIR548AP | MIR548AP  |
| APOOL    | no_gene   |
| MIR548AP | MIR548AP  |
| MIR548AP | TGFBR3    |
| no_gene  | no_gene   |
| no_gene  | MAD1L1    |
| no_gene  | AP4S1     |
| TTL7     | no_gene   |
| no_gene  | no_gene   |
| no_gene  | no_gene   |
| no_gene  | no_gene   |
| PRKACB   | DPYD      |

|           |         |
|-----------|---------|
| NRG3      | NRG3    |
| PRKACB    | no_gene |
| PRKACB    | SSX2IP  |
| PRKACB    | no_gene |
| NRG3      | NRG3    |
| PRKACB    | no_gene |
| DLG2      | DLG2    |
| PRKACB    | no_gene |
| PRKACB    | no_gene |
| DLG2      | DLG2    |
| no_gene   | no_gene |
| SAMD13    | no_gene |
| SAMD13    | LRRIQ3  |
| LOC388152 | no_gene |
| no_gene   | no_gene |
| DNASE2B   | no_gene |
| no_gene   | no_gene |
| no_gene   | TLL7    |
| no_gene   | no_gene |
| CRISPLD2  | USP10   |
| CRISPLD2  | USP10   |
| no_gene   | COL19A1 |
| no_gene   | no_gene |
| C1orf180  | no_gene |
| SSX2IP    | PRKACB  |
| SSX2IP    | no_gene |
| no_gene   | no_gene |
| CHM       | no_gene |
| no_gene   | no_gene |
| LPAR3     | DPYD    |
| LPAR3     | no_gene |

|          |            |
|----------|------------|
| no_gene  | no_gene    |
| LPAR3    | CCDC18     |
| LPAR3    | no_gene    |
| LPAR3    | no_gene    |
| LPAR3    | no_gene    |
| DLG2     | no_gene    |
| DLG2     | no_gene    |
| no_gene  | no_gene    |
| LPAR3    | NTNG1      |
| LPAR3    | no_gene    |
| no_gene  | LPAR3      |
| no_gene  | LOC284581  |
| no_gene  | DEPDC1B    |
| no_gene  | DEPDC1B    |
| MCOLN2   | no_gene    |
| SYTL2    | no_gene    |
| MCOLN3   | CCDC18     |
| MCOLN3   | no_gene    |
| WDR63    | no_gene    |
| no_gene  | SYTL2      |
| WDR63    | BCAR3      |
| SYDE2    | no_gene    |
| SYDE2    | no_gene    |
| SYDE2    | no_gene    |
| no_gene  | no_gene    |
| C1orf52  | no_gene    |
| no_gene  | no_gene    |
| no_gene  | ADAM29     |
| no_gene  | C12orf56   |
| BCL10    | ZNF326     |
| no_gene  | GOLGA6L10  |
| no_gene  | no_gene    |
| DDAH1    | no_gene    |
| DDAH1    | LRRIQ3     |
| DACH2    | DACH2      |
| DDAH1    | MSH4       |
| DDAH1    | ST6GALNAC3 |
| DDAH1    | COL24A1    |
| DACH2    | DACH2      |
| DDAH1    | LMO4       |
| DDAH1    | MTF2       |
| C10orf99 | CDC42BPA   |
| C10orf99 | CDC42BPA   |
| DDAH1    | no_gene    |

|         |         |
|---------|---------|
| DDAH1   | no_gene |
| DDAH1   | no_gene |
| DDAH1   | no_gene |
| no_gene | no_gene |
| DDAH1   | 15-Sep  |
| no_gene | no_gene |
| DACH2   | no_gene |
| DACH2   | NDUFA4  |
| CADM2   | HTR1F   |
| no_gene | no_gene |
| no_gene | no_gene |
| CADM2   | no_gene |
| ZNHIT6  | GLMN    |
| ZNHIT6  | no_gene |
| ZNHIT6  | no_gene |
| no_gene | no_gene |
| no_gene | LPHN2   |
| CCSER2  | CCSER2  |
| COL24A1 | COL24A1 |
| CCSER2  | CCSER2  |
| no_gene | 1-Mar   |
| MGAT4C  | AGR3    |
| no_gene | no_gene |
| COL24A1 | no_gene |
| COL24A1 | LRRC8D  |
| COL24A1 | no_gene |
| COL24A1 | no_gene |
| COL24A1 | DDAH1   |
| COL24A1 | COL24A1 |
| no_gene | no_gene |
| no_gene | no_gene |
| COL24A1 | HSD3B2  |
| COL24A1 | HSD3B2  |
| COL24A1 | no_gene |
| no_gene | no_gene |
| no_gene | FABP9   |
| COL24A1 | LRRC8D  |
| COL24A1 | no_gene |
| no_gene | no_gene |
| COL24A1 | no_gene |
| COL24A1 | no_gene |
| no_gene | no_gene |
| no_gene | SLC44A5 |
| no_gene | no_gene |

|           |             |
|-----------|-------------|
| no_gene   | no_gene     |
| no_gene   | no_gene     |
| no_gene   | no_gene     |
| MGAT4C    | MGAT4C      |
| no_gene   | no_gene     |
| MGAT4C    | MGAT4C      |
| no_gene   | no_gene     |
| no_gene   | no_gene     |
| ODF2L     | LRRC8B      |
| ODF2L     | LPHN2       |
| ODF2L     | no_gene     |
| ODF2L     | no_gene     |
| ODF2L     | ALG14       |
| ODF2L     | SLC25A24    |
| AGBL1     | AGBL1       |
| no_gene   | LPHN2       |
| no_gene   | FPGT-TNNI3K |
| CLCA2     | ACADM       |
| CLCA2     | GLMN        |
| AGBL1     | AGBL1       |
| CLCA2     | FPGT-TNNI3K |
| no_gene   | no_gene     |
| RMND5A    | LOC285074   |
| no_gene   | ALG14       |
| no_gene   | no_gene     |
| CLCA4     | no_gene     |
| no_gene   | CADM2       |
| CLCA4     | no_gene     |
| CLCA4     | EVI5        |
| CLCA4     | NTNG1       |
| no_gene   | ZNHIT6      |
| no_gene   | no_gene     |
| CLCA3P    | no_gene     |
| no_gene   | no_gene     |
| RGPD2     | no_gene     |
| no_gene   | no_gene     |
| LOC285074 | RMND5A      |
| no_gene   | no_gene     |
| no_gene   | no_gene     |
| 15-Sep    | DDAH1       |

|           |           |
|-----------|-----------|
| 15-Sep    | no_gene   |
| no_gene   | RGPD2     |
| LOC283585 | no_gene   |
| no_gene   | GALNT11   |
| no_gene   | PCP4L1    |
| HS2ST1    | RPAP2     |
| no_gene   | no_gene   |
| HS2ST1    | no_gene   |
| HS2ST1    | no_gene   |
| no_gene   | LOC283585 |
| HS2ST1    | no_gene   |
| HS2ST1    | no_gene   |
| HS2ST1    | no_gene   |
| WWP1      | no_gene   |
| no_gene   | no_gene   |
| LOC339524 | no_gene   |
| LOC339524 | no_gene   |
| LOC339524 | no_gene   |
| no_gene   | SNX7      |
| no_gene   | no_gene   |
| no_gene   | LPHN2     |
| no_gene   | COL11A1   |
| no_gene   | no_gene   |
| no_gene   | AKNAD1    |
| no_gene   | ASB17     |
| no_gene   | no_gene   |
| no_gene   | no_gene   |
| no_gene   | no_gene   |
| LMO4      | DDAH1     |
| LMO4      | DNTTIP2   |
| CNBD1     | no_gene   |
| GJB7      | C6orf163  |
| HTR1F     | CADM2     |
| HTR1F     | no_gene   |
| C6orf163  | GJB7      |
| no_gene   | HFM1      |
| no_gene   | no_gene   |
| no_gene   | no_gene   |
| RGPD2     | RGPD5     |
| no_gene   | no_gene   |
| RGPD2     | RGPD1     |



|         |              |
|---------|--------------|
| no_gene | AMY1B        |
| no_gene | no_gene      |
| no_gene | ST6GALNAC5   |
| no_gene | no_gene      |
| no_gene | no_gene      |
| no_gene | no_gene      |
| RGPD1   | RGPD2        |
| no_gene | no_gene      |
| no_gene | APOOL        |
| no_gene | no_gene      |
| no_gene | no_gene      |
| ZNF804B | ZNF804B      |
| ZNF804B | ZNF804B      |
| no_gene | no_gene      |
| no_gene | no_gene      |
| no_gene | no_gene      |
| no_gene | HTR1F        |
| no_gene | DNTTIP2      |
| no_gene | PEX1         |
| no_gene | PKN2         |
| no_gene | PSRC1        |
| no_gene | no_gene      |
| no_gene | ABCA4        |
| no_gene | no_gene      |
| no_gene | FYB          |
| no_gene | FYB          |
| no_gene | DNAJB4       |
| no_gene | WDR47        |
| no_gene | PKN2         |
| no_gene | no_gene      |
| no_gene | no_gene      |
| no_gene | LOC100128787 |
| no_gene | no_gene      |
| no_gene | no_gene      |
| no_gene | no_gene      |

|         |            |
|---------|------------|
| no_gene | SYDE2      |
| no_gene | no_gene    |
| no_gene | no_gene    |
| no_gene | ST6GALNAC3 |
| no_gene | SNX7       |
| no_gene | no_gene    |
| no_gene | SORT1      |
| no_gene | no_gene    |
| no_gene | no_gene    |
| no_gene | BCAR3      |
| no_gene | ZNHIT6     |
| no_gene | no_gene    |
| no_gene | no_gene    |
| no_gene | TGFBR3     |
| no_gene | no_gene    |
| FAM22A  | FAM22G     |
| RPIA    | no_gene    |
| no_gene | no_gene    |
| ABCG2   | no_gene    |
| DET1    | no_gene    |
| no_gene | no_gene    |
| no_gene | KIAA1324   |
| no_gene | no_gene    |
| no_gene | no_gene    |
| no_gene | ZZZ3       |
| no_gene | no_gene    |
| PKN2    | EXTL2      |
| PKN2    | no_gene    |
| PKN2    | no_gene    |
| PKN2    | no_gene    |
| PKN2    | ST6GALNAC3 |
| no_gene | ATP8B5P    |
| no_gene | no_gene    |
| no_gene | no_gene    |
| RNGTT   | RNGTT      |
| no_gene | EYS        |
| no_gene | PKN2       |
| no_gene | no_gene    |
| CCBL2   | SLC30A7    |
| RNGTT   | RNGTT      |

|           |            |
|-----------|------------|
| RNGTT     | MARCO      |
| CCBL2     | ST6GALNAC3 |
| CCBL2     | TAF13      |
| no_gene   | no_gene    |
| no_gene   | no_gene    |
| no_gene   | no_gene    |
| TRIM49    | no_gene    |
| LOC440173 | NA         |
| LOC440173 | NA         |
| no_gene   | no_gene    |
| MIR5692A1 | no_gene    |
| no_gene   | TAF1B      |
| no_gene   | TRIM49     |
| no_gene   | no_gene    |
| no_gene   | BTBD8      |
| GBP6      | DPYD       |
| NAALAD2   | no_gene    |
| NAALAD2   | no_gene    |
| GBP1P1    | no_gene    |
| FAM13A    | FAM13A     |
| FAM13A    | FAM13A     |
| no_gene   | no_gene    |
| no_gene   | BRDT       |
| no_gene   | no_gene    |
| no_gene   | no_gene    |
| LRR8B     | no_gene    |
| LRR8B     | BTBD8      |
| LRR8B     | no_gene    |
| LRR8B     | ST6GALNAC5 |
| LRR8B     | no_gene    |
| LRR8B     | ODF2L      |
| GPR98     | no_gene    |
| GPR98     | no_gene    |
| no_gene   | no_gene    |
| no_gene   | no_gene    |
| no_gene   | no_gene    |
| RNLS      | RNLS       |
| RNLS      | RNLS       |
| no_gene   | LOC399744  |
| no_gene   | no_gene    |
| no_gene   | no_gene    |
| LRR8D     | no_gene    |
| LRR8D     | COL24A1    |
| LRR8D     | COL24A1    |



|           |          |
|-----------|----------|
| ZNF644    | no_gene  |
| AKAP9     | DPY19L4  |
| no_gene   | no_gene  |
| no_gene   | no_gene  |
| no_gene   | ZNF644   |
| no_gene   | no_gene  |
| no_gene   | DPH5     |
| no_gene   | no_gene  |
| no_gene   | no_gene  |
| no_gene   | no_gene  |
| no_gene   | ZNF644   |
| no_gene   | no_gene  |
| no_gene   | no_gene  |
| no_gene   | DR1      |
| no_gene   | no_gene  |
| no_gene   | ATP8B5P  |
| no_gene   | no_gene  |
| no_gene   | HFM1     |
| no_gene   | ZNF211   |
| HFM1      | no_gene  |
| no_gene   | no_gene  |
| HFM1      | HFM1     |
| HFM1      | no_gene  |
| HFM1      | HFM1     |
| HFM1      | ELTD1    |
| LOC654342 | no_gene  |
| HFM1      | no_gene  |
| no_gene   | ZBTB49   |
| PCDH11X   | no_gene  |
| no_gene   | TOP1MT   |
| no_gene   | MLL3     |
| no_gene   | C1orf146 |
| no_gene   | no_gene  |
| no_gene   | NAALAD2  |
| no_gene   | NAALAD2  |
| no_gene   | no_gene  |
| CCSER1    | PDE10A   |
| CCSER1    | no_gene  |
| PEX1      | no_gene  |
| no_gene   | no_gene  |
| TGFBR3    | MIR548AP |

|          |          |
|----------|----------|
| TGFBR3   | RNPC3    |
| TGFBR3   | no_gene  |
| TGFBR3   | OLFM3    |
| TGFBR3   | no_gene  |
| TGFBR3   | no_gene  |
| CCSER1   | C1orf186 |
| TGFBR3   | no_gene  |
| TRIP11   | no_gene  |
| BRDT     | no_gene  |
| no_gene  | no_gene  |
| no_gene  | no_gene  |
| no_gene  | CDH10    |
| EPHX4    | no_gene  |
| no_gene  | no_gene  |
| EPHX4    | no_gene  |
| no_gene  | no_gene  |
| BTBD8    | no_gene  |
| BTBD8    | no_gene  |
| HTR7     | no_gene  |
| BTBD8    | no_gene  |
| BTBD8    | LRRC8B   |
| BTBD8    | RPAP2    |
| no_gene  | SDHAP3   |
| no_gene  | no_gene  |
| no_gene  | no_gene  |
| no_gene  | LPHN2    |
| no_gene  | ODF2L    |
| no_gene  | no_gene  |
| no_gene  | MYO3B    |
| C1orf146 | RPAP2    |
| no_gene  | no_gene  |
| C1orf146 | no_gene  |
| no_gene  | no_gene  |
| no_gene  | no_gene  |
| no_gene  | FLJ42709 |
| GLMN     | CLCA2    |
| FLJ42709 | no_gene  |
| GLMN     | ZNHIT6   |
| no_gene  | no_gene  |
| no_gene  | no_gene  |
| GLMN     | no_gene  |
| RPAP2    | C1orf146 |
| no_gene  | CUBN     |
| RPAP2    | GIPC2    |

|             |              |
|-------------|--------------|
| RPAP2       | RPAP2        |
| RPAP2       | HS2ST1       |
| RPAP2       | ST6GALNAC3   |
| RPAP2       | no_gene      |
| RPAP2       | RPAP2        |
| RPAP2       | KIAA1324     |
| no_gene     | no_gene      |
| RPAP2       | BTBD8        |
| FLJ42709    | FLJ42709     |
| no_gene     | FPGT-TNNI3K  |
| FLJ42709    | FLJ42709     |
| CCDC132     | no_gene      |
| no_gene     | no_gene      |
| GFI1        | no_gene      |
| GFI1        | GIPC2        |
| no_gene     | LOC100508120 |
| no_gene     | no_gene      |
| EVI5        | no_gene      |
| no_gene     | SLC5A1       |
| no_gene     | SLC5A1       |
| PCGF5       | LOC100188947 |
| EVI5        | no_gene      |
| EVI5        | CLCA4        |
| EVI5        | no_gene      |
| LOC10018894 | PCGF5        |
| RUNX1T1     | RIMS2        |
| GRID2       | GRID2        |
| C11orf75    | SRP14        |
| GRID2       | GRID2        |
| no_gene     | no_gene      |
| FAM69A      | TYW3         |
| no_gene     | no_gene      |
| LOC643339   | LOC643339    |
| MTF2        | no_gene      |
| MTF2        | DDAH1        |
| no_gene     | no_gene      |
| MTF2        | no_gene      |
| no_gene     | no_gene      |

|             |            |
|-------------|------------|
| LOC643339   | LOC643339  |
| TMED5       | no_gene    |
| CCDC18      | MCOLN3     |
| CCDC18      | ACTG1P4    |
| KIAA0825    | no_gene    |
| CCDC18      | LPAR3      |
| no_gene     | no_gene    |
| CCDC18      | DBT        |
| no_gene     | no_gene    |
| LOC10013156 | ST6GALNAC5 |
| LOC10013156 | LPPR5      |
| LOC10013156 | WDR47      |
| DR1         | no_gene    |
| no_gene     | no_gene    |
| HEPHL1      | MUM1L1     |
| no_gene     | no_gene    |
| no_gene     | LHX8       |
| TRIQQ       | TRIQQ      |
| FNBP1L      | no_gene    |
| FNBP1L      | no_gene    |
| FNBP1L      | no_gene    |
| TRIQQ       | TRIQQ      |
| no_gene     | no_gene    |
| FNBP1L      | no_gene    |
| no_gene     | no_gene    |
| no_gene     | no_gene    |
| no_gene     | no_gene    |
| BCAR3       | no_gene    |
| BCAR3       | ST6GALNAC3 |
| BCAR3       | no_gene    |
| BCAR3       | no_gene    |
| no_gene     | no_gene    |
| no_gene     | no_gene    |
| CRADD       | COL4A1     |
| BCAR3       | no_gene    |
| BCAR3       | WDR63      |
| BCAR3       | AKNAD1     |
| DNTTIP2     | LMO4       |
| DNTTIP2     | no_gene    |
| no_gene     | no_gene    |
| no_gene     | no_gene    |



|           |              |
|-----------|--------------|
| no_gene   | no_gene      |
| no_gene   | no_gene      |
| ABCA4     | no_gene      |
| ABCA4     | no_gene      |
| ABCA4     | no_gene      |
| no_gene   | RCOR2        |
| no_gene   | FNBP1L       |
| no_gene   | no_gene      |
| ARHGAP29  | no_gene      |
| no_gene   | no_gene      |
| no_gene   | no_gene      |
| ARHGAP29  | no_gene      |
| no_gene   | no_gene      |
| CCDC41    | FTMT         |
| no_gene   | ARHGAP29     |
| CCDC41    | no_gene      |
| no_gene   | no_gene      |
| no_gene   | no_gene      |
| no_gene   | MCTP2        |
| no_gene   | no_gene      |
| MCTP2     | no_gene      |
| ABCD3     | VPS8         |
| no_gene   | no_gene      |
| SERPINA12 | CSNK1G1      |
| SERPINA12 | CSNK1G1      |
| SERPINA12 | no_gene      |
| SERPINA12 | no_gene      |
| no_gene   | NTNG1        |
| no_gene   | no_gene      |
| no_gene   | no_gene      |
| no_gene   | LOC100129620 |
| no_gene   | no_gene      |
| no_gene   | FNBP1L       |
| no_gene   | CRYZ         |
| no_gene   | no_gene      |

|            |            |
|------------|------------|
| no_gene    | no_gene    |
| HPGDS      | no_gene    |
| no_gene    | DDAH1      |
| no_gene    | ST6GALNAC3 |
| no_gene    | SLC44A5    |
| ECM2       | no_gene    |
| no_gene    | no_gene    |
| no_gene    | no_gene    |
| SLC44A3    | NTNG1      |
| no_gene    | no_gene    |
| SLC44A3    | no_gene    |
| SLC44A3    | LPHN2      |
| no_gene    | no_gene    |
| CNN3       | no_gene    |
| no_gene    | no_gene    |
| CNN3       | ST6GALNAC3 |
| no_gene    | PDE4D      |
| LOC729970  | no_gene    |
| LOC729970  | no_gene    |
| LOC729970  | RPL22      |
| LOC729970  | MGC27382   |
| RAD54B     | RAD54B     |
| ALG14      | no_gene    |
| RAD54B     | RAD54B     |
| ALG14      | no_gene    |
| ALG14      | no_gene    |
| ANKRD20A8P | AQP7P1     |
| ANKRD20A8P | AQP7P1     |
| ANKRD20A8P | AQP7P1     |
| ANKRD20A8P | AQP7       |
| ALG14      | ODF2L      |
| no_gene    | LOC729970  |
| TMEM56-RW  | no_gene    |
| no_gene    | MALL       |
| no_gene    | no_gene    |
| no_gene    | SLC44A5    |
| no_gene    | MSH4       |
| no_gene    | SSX2IP     |
| DPY19L4    | AKAP9      |
| no_gene    | LPAR3      |
| no_gene    | no_gene    |
| no_gene    | EYS        |
| no_gene    | no_gene    |
| BMPR1B     | BMPR1B     |

|         |              |
|---------|--------------|
| no_gene | no_gene      |
| BMPR1B  | BMPR1B       |
| no_gene | no_gene      |
| no_gene | no_gene      |
| KCNIP3  | KCNIP3       |
| KCNIP3  | KCNIP3       |
| no_gene | EPHX4        |
| no_gene | no_gene      |
| no_gene | no_gene      |
| no_gene | no_gene      |
| no_gene | FPGT-TNNI3K  |
| no_gene | no_gene      |
| CAST    | COX10        |
| no_gene | no_gene      |
| TCL1A   | no_gene      |
| DIAPH2  | DIAPH2       |
| DIAPH2  | DIAPH2       |
| no_gene | TCL1A        |
| FAM120A | FAM120A      |
| no_gene | no_gene      |
| FAM120A | FAM120A      |
| no_gene | no_gene      |
| no_gene | RNF141       |
| no_gene | LOC100129620 |
| no_gene | no_gene      |
| no_gene | FRRS1        |
| DIAPH2  | no_gene      |
| no_gene | LRRIQ3       |
| no_gene | no_gene      |
| RIOK2   | no_gene      |
| no_gene | no_gene      |
| no_gene | LPHN2        |
| no_gene | no_gene      |

|             |          |
|-------------|----------|
| no_gene     | RIOK2    |
| no_gene     | no_gene  |
| no_gene     | SLC44A5  |
| no_gene     | MSH4     |
| no_gene     | no_gene  |
| no_gene     | ARHGEF7  |
| no_gene     | no_gene  |
| no_gene     | DLG2     |
| no_gene     | EYS      |
| no_gene     | NTNG1    |
| no_gene     | no_gene  |
| LOC10061653 | no_gene  |
| LOC10061653 | KCNQ3    |
| no_gene     | no_gene  |
| no_gene     | GPSM2    |
| no_gene     | ARHGAP29 |
| no_gene     | no_gene  |
| no_gene     | no_gene  |
| no_gene     | MIR137HG |
| no_gene     | no_gene  |
| no_gene     | no_gene  |
| no_gene     | ABCA4    |
| no_gene     | GPSM2    |
| no_gene     | VCAM1    |
| no_gene     | no_gene  |
| no_gene     | no_gene  |
| no_gene     | AK5      |
| no_gene     | no_gene  |
| no_gene     | no_gene  |
| no_gene     | no_gene  |
| no_gene     | ABCC2    |
| no_gene     | no_gene  |
| no_gene     | no_gene  |
| no_gene     | no_gene  |
| no_gene     | VAV3     |
| no_gene     | no_gene  |
| no_gene     | no_gene  |
| no_gene     | GBP1P1   |
| no_gene     | no_gene  |
| no_gene     | no_gene  |
| no_gene     | MCOLN2   |
| no_gene     | LHX8     |
| PTBP2       | no_gene  |
| PTBP2       | PTBP2    |

|            |         |
|------------|---------|
| no_gene    | no_gene |
| no_gene    | TRPA1   |
| PTBP2      | no_gene |
| PTBP2      | PTBP2   |
| MTERFD1    | no_gene |
| no_gene    | no_gene |
| no_gene    | no_gene |
| no_gene    | 15-Sep  |
| no_gene    | no_gene |
| no_gene    | no_gene |
| no_gene    | COL11A1 |
| no_gene    | no_gene |
| no_gene    | no_gene |
| no_gene    | no_gene |
| no_gene    | OLFM3   |
| no_gene    | no_gene |
| no_gene    | COL24A1 |
| no_gene    | COL24A1 |
| no_gene    | no_gene |
| DPYD       | GBP6    |
| no_gene    | MAP3K19 |
| DPYD       | PRKACB  |
| no_gene    | DEFB131 |
| DPYD       | no_gene |
| DPYD       | LPAR3   |
| no_gene    | GPR98   |
| no_gene    | GPR98   |
| no_gene    | STAC    |
| ENTPD1-AS1 | PCDH9   |
| no_gene    | no_gene |
| DPYD       | no_gene |
| DPYD       | no_gene |
| no_gene    | OR5H14  |
| no_gene    | no_gene |
| no_gene    | no_gene |
| OR5H14     | no_gene |
| DPYD       | no_gene |
| DPYD       | no_gene |
| no_gene    | no_gene |
| no_gene    | no_gene |
| no_gene    | no_gene |

|           |            |
|-----------|------------|
| no_gene   | no_gene    |
| no_gene   | no_gene    |
| DPYD      | no_gene    |
| DPYD      | no_gene    |
| DPYD      | no_gene    |
| no_gene   | no_gene    |
| DPYD      | no_gene    |
| DPYD      | DPYD       |
| DPYD      | PAPPA2     |
| DPYD      | PAPPA2     |
| DPYD      | AMY2B      |
| no_gene   | AGBL4      |
| DPYD      | PSMA5      |
| DPYD      | PSMA5      |
| no_gene   | no_gene    |
| DPYD      | DPYD       |
| no_gene   | no_gene    |
| no_gene   | no_gene    |
| DPYD      | no_gene    |
| no_gene   | WWP1       |
| no_gene   | NA         |
| no_gene   | no_gene    |
| no_gene   | DPYD       |
| TMEM131   | no_gene    |
| TMEM131   | BCYRN1     |
| MIR137HG  | no_gene    |
| MIR137HG  | no_gene    |
| no_gene   | ABCC6P2    |
| no_gene   | no_gene    |
| no_gene   | no_gene    |
| no_gene   | TEKT4P2    |
| ERCC6L2   | ERCC6L2    |
| LOC729987 | NTNG1      |
| no_gene   | no_gene    |
| ERCC6L2   | ERCC6L2    |
| no_gene   | OTUD7A     |
| no_gene   | no_gene    |
| no_gene   | no_gene    |
| no_gene   | no_gene    |
| no_gene   | DPYD       |
| no_gene   | ST6GALNAC3 |

|             |              |
|-------------|--------------|
| LAPTM4B     | no_gene      |
| LAPTM4B     | no_gene      |
| no_gene     | no_gene      |
| INPP4A      | INPP4A       |
| no_gene     | no_gene      |
| SNX7        | no_gene      |
| no_gene     | no_gene      |
| no_gene     | AZGP1        |
| INPP4A      | INPP4A       |
| no_gene     | no_gene      |
| SNX7        | no_gene      |
| no_gene     | no_gene      |
| no_gene     | COL11A1      |
| no_gene     | no_gene      |
| no_gene     | no_gene      |
| LPPR5       | no_gene      |
| no_gene     | no_gene      |
| LPPR5       | no_gene      |
| LPPR5       | SLC44A5      |
| LPPR5       | LOC100129620 |
| LPPR5       | no_gene      |
| LPPR5       | LOC100131564 |
| LPPR5       | no_gene      |
| LOC10012962 | no_gene      |
| LOC10012962 | LPPR5        |
| no_gene     | no_gene      |
| AZGP1       | no_gene      |
| AZGP1       | AQP4-AS1     |
| LOC10012962 | no_gene      |
| LOC10012962 | no_gene      |
| LOC10012962 | LHX8         |
| LOC10012962 | no_gene      |
| ZKSCAN1     | ZKSCAN1      |
| ZKSCAN1     | ZKSCAN1      |
| FAM22G      | FAM22A       |
| no_gene     | HS2ST1       |
| no_gene     | no_gene      |
| STK3        | STK3         |
| STK3        | STK3         |

|             |             |
|-------------|-------------|
| MRPL30      | BEND6       |
| no_gene     | no_gene     |
| no_gene     | NEGR1       |
| no_gene     | no_gene     |
| no_gene     | no_gene     |
| no_gene     | LPPR5       |
| no_gene     | no_gene     |
| ADH5        | no_gene     |
| VPS13B      | VPS13B      |
| no_gene     | FNBP1L      |
| no_gene     | no_gene     |
| no_gene     | no_gene     |
| no_gene     | no_gene     |
| VPS13B      | VPS13B      |
| no_gene     | NTNG1       |
| no_gene     | no_gene     |
| no_gene     | no_gene     |
| LOC10050705 | no_gene     |
| MIR548AA1   | SORT1       |
| FRRS1       | no_gene     |
| no_gene     | FPGT-TNNI3K |
| no_gene     | LRRIQ3      |
| no_gene     | no_gene     |
| DNM1P46     | no_gene     |
| AGL         | no_gene     |
| no_gene     | GIPC2       |
| no_gene     | HLA-DRB6    |
| VPS13B      | VPS13B      |
| SLC35A3     | no_gene     |
| VPS13B      | VPS13B      |
| HIAT1       | no_gene     |
| no_gene     | TNPO1       |
| no_gene     | TNPO1       |
| LRRC39      | no_gene     |
| DBT         | CCDC18      |
| DBT         | no_gene     |



|             |              |
|-------------|--------------|
| no_gene     | BCAR3        |
| HPSE2       | no_gene      |
| no_gene     | TMEM56-RWDD3 |
| HPSE2       | HPSE2        |
| ARHGAP42    | no_gene      |
| ARHGAP42    | no_gene      |
| CDC14A      | no_gene      |
| CDC14A      | no_gene      |
| HPSE2       | HPSE2        |
| CORO2A      | CORO2A       |
| CORO2A      | CORO2A       |
| WDR25       | WDR25        |
| WDR25       | WDR25        |
| CDC14A      | HENMT1       |
| CDC14A      | AK5          |
| no_gene     | SLC35F4      |
| no_gene     | no_gene      |
| no_gene     | SLC30A7      |
| no_gene     | CDC14A       |
| no_gene     | no_gene      |
| no_gene     | ST6GALNAC3   |
| LOC10012878 | no_gene      |
| no_gene     | no_gene      |
| no_gene     | no_gene      |
| no_gene     | no_gene      |
| LOC10012878 | ST6GALNAC3   |
| no_gene     | no_gene      |
| no_gene     | DNAJB4       |
| no_gene     | CNN3         |
| no_gene     | no_gene      |
| no_gene     | EVI5         |
| no_gene     | no_gene      |
| VCAM1       | no_gene      |
| no_gene     | PIGK         |
| no_gene     | no_gene      |
| no_gene     | no_gene      |
| EXTL2       | no_gene      |
| no_gene     | no_gene      |
| no_gene     | LOC646762    |
| EXTL2       | PKN2         |
| SLC30A7     | CCBL2        |

|           |            |
|-----------|------------|
| SLC30A7   | no_gene    |
| no_gene   | no_gene    |
| SLC30A7   | no_gene    |
| no_gene   | no_gene    |
| no_gene   | no_gene    |
| no_gene   | no_gene    |
| GABBR2    | no_gene    |
| DPH5      | no_gene    |
| no_gene   | SORT1      |
| no_gene   | no_gene    |
| no_gene   | SSBP1      |
| no_gene   | no_gene    |
| ABCC2     | no_gene    |
| ABCC2     | no_gene    |
| CUX1      | CUX1       |
| no_gene   | no_gene    |
| CUX1      | CUX1       |
| no_gene   | no_gene    |
| no_gene   | SLC35A3    |
| RNU6-6    | no_gene    |
| RNU6-6    | no_gene    |
| RNU6-6    | no_gene    |
| no_gene   | GRIK2      |
| no_gene   | no_gene    |
| SLCO6A1   | no_gene    |
| GRIK2     | no_gene    |
| no_gene   | SLCO6A1    |
| no_gene   | no_gene    |
| no_gene   | ST6GALNAC3 |
| no_gene   | no_gene    |
| no_gene   | no_gene    |
| no_gene   | MGC27382   |
| no_gene   | no_gene    |
| no_gene   | LRRC8B     |
| no_gene   | no_gene    |
| no_gene   | no_gene    |
| LINC00630 | no_gene    |
| no_gene   | no_gene    |
| LINC00263 | PP7080     |
| no_gene   | PC         |

|           |           |
|-----------|-----------|
| BIRC3     | BIRC2     |
| no_gene   | no_gene   |
| no_gene   | no_gene   |
| BIRC2     | BIRC3     |
| no_gene   | no_gene   |
| no_gene   | no_gene   |
| no_gene   | GOLGA6D   |
| OLFM3     | TGFBR3    |
| OR4F15    | OR4F13P   |
| no_gene   | GLB1L3    |
| no_gene   | GLB1L3    |
| OR4F13P   | OR4F15    |
| no_gene   | no_gene   |
| no_gene   | no_gene   |
| OLFM3     | no_gene   |
| no_gene   | no_gene   |
| FAM138E   | OR4F21    |
| HSP90AA1  | no_gene   |
| no_gene   | no_gene   |
| no_gene   | no_gene   |
| MMP10     | MMP3      |
| FGF14     | L1TD1     |
| no_gene   | no_gene   |
| no_gene   | no_gene   |
| MMP3      | MMP10     |
| no_gene   | no_gene   |
| no_gene   | RAB40A    |
| no_gene   | no_gene   |
| no_gene   | no_gene   |
| no_gene   | no_gene   |
| RAB40A    | no_gene   |
| no_gene   | LINC00630 |
| no_gene   | COL11A1   |
| no_gene   | no_gene   |
| BANK1     | no_gene   |
| BANK1     | CDH18     |
| BANK1     | no_gene   |
| DPY19L2P2 | no_gene   |
| no_gene   | no_gene   |
| no_gene   | no_gene   |
| no_gene   | CLCA4     |
| no_gene   | no_gene   |
| no_gene   | PCDH11X   |
| no_gene   | no_gene   |



|          |             |
|----------|-------------|
| no_gene  | no_gene     |
| no_gene  | SDHAP3      |
| ORC5     | no_gene     |
| LPPR1    | no_gene     |
| no_gene  | ORC5        |
| RNPC3    | ST6GALNAC3  |
| RNPC3    | TGFBR3      |
| no_gene  | no_gene     |
| AMY2B    | DPYD        |
| ACTG1P4  | CCDC18      |
| AMY2B    | no_gene     |
| no_gene  | no_gene     |
| IL1RAPL2 | no_gene     |
| IL1RAPL2 | no_gene     |
| no_gene  | no_gene     |
| no_gene  | EDNRB       |
| BAALC    | BAALC       |
| AMY1B    | no_gene     |
| BAALC    | BAALC       |
| no_gene  | no_gene     |
| no_gene  | no_gene     |
| no_gene  | FPGT-TNNI3K |
| no_gene  | LRRC39      |
| no_gene  | no_gene     |
| no_gene  | no_gene     |
| no_gene  | ELTD1       |
| no_gene  | SLC44A3     |
| no_gene  | no_gene     |
| no_gene  | LHX8        |
| RIMS2    | no_gene     |
| no_gene  | no_gene     |
| IL1RAPL2 | WDR70       |
| RIMS2    | CSMD1       |
| RIMS2    | RUNX1T1     |
| no_gene  | ZZZ3        |
| no_gene  | no_gene     |
| RIMS2    | RIMS2       |
| RIMS2    | RIMS2       |
| no_gene  | no_gene     |
| no_gene  | no_gene     |





|             |          |
|-------------|----------|
| no_gene     | no_gene  |
| SORCS3      | SORCS3   |
| LOC10030264 | no_gene  |
| SORCS3      | SORCS3   |
| no_gene     | no_gene  |
| no_gene     | no_gene  |
| no_gene     | PTBP2    |
| no_gene     | no_gene  |
| no_gene     | HFM1     |
| no_gene     | CLCA3P   |
| no_gene     | DDAH1    |
| no_gene     | no_gene  |
| no_gene     | no_gene  |
| LOC10028794 | ANKRD52  |
| LOC10028794 | ANKRD52  |
| no_gene     | no_gene  |
| no_gene     | LPPR5    |
| no_gene     | no_gene  |
| no_gene     | no_gene  |
| LOC10028794 | no_gene  |
| no_gene     | USP7     |
| LOC10028794 | AUTS2    |
| no_gene     | no_gene  |
| no_gene     | no_gene  |
| no_gene     | no_gene  |
| LOC10028794 | GLS2     |
| no_gene     | DPYD     |
| LOC10028794 | MYL6     |
| no_gene     | no_gene  |
| no_gene     | no_gene  |
| LOC10028794 | no_gene  |
| no_gene     | no_gene  |
| RIC8B       | SLC25A52 |
| no_gene     | SORT1    |
| no_gene     | no_gene  |
| RIC8B       | SMARCC2  |
| no_gene     | no_gene  |



|         |           |
|---------|-----------|
| no_gene | no_gene   |
| MTERFD3 | FAM19A2   |
| no_gene | no_gene   |
| no_gene | no_gene   |
| CRY1    | ASXL3     |
| no_gene | no_gene   |
| OXR1    | no_gene   |
| no_gene | no_gene   |
| COL4A6  | COL4A6    |
| no_gene | COL24A1   |
| no_gene | LPHN2     |
| COL4A6  | COL4A6    |
| no_gene | no_gene   |
| no_gene | no_gene   |
| no_gene | SLC35F2   |
| no_gene | no_gene   |
| SLC35F2 | no_gene   |
| no_gene | no_gene   |
| NTNG1   | LPAR3     |
| NTNG1   | no_gene   |
| NTNG1   | AK5       |
| NTNG1   | LOC729987 |
| NTNG1   | NTNG1     |
| NTNG1   | no_gene   |
| no_gene | no_gene   |
| no_gene | no_gene   |
| NTNG1   | NTNG1     |
| NTNG1   | no_gene   |
| no_gene | no_gene   |
| NTNG1   | CLCA4     |
| NTNG1   | MGC27382  |
| NTNG1   | no_gene   |
| NTNG1   | no_gene   |
| NTNG1   | no_gene   |
| NTNG1   | SLC44A3   |

|          |              |
|----------|--------------|
| BTBD11   | no_gene      |
| BTBD11   | no_gene      |
| no_gene  | no_gene      |
| VAV3     | LRRIQ3       |
| no_gene  | no_gene      |
| ANGPT1   | no_gene      |
| no_gene  | no_gene      |
| no_gene  | no_gene      |
| VAV3     | no_gene      |
| VAV3     | VAV3         |
| VAV3     | VAV3         |
| FAM155A  | FAM155A      |
| FAM155A  | FAM155A      |
| no_gene  | LOC100505495 |
| no_gene  | no_gene      |
| no_gene  | no_gene      |
| no_gene  | SYDE2        |
| no_gene  | no_gene      |
| no_gene  | no_gene      |
| no_gene  | no_gene      |
| no_gene  | FPGT-TNNI3K  |
| no_gene  | ST6GALNAC3   |
| no_gene  | no_gene      |
| no_gene  | no_gene      |
| DDX10    | DDX10        |
| no_gene  | no_gene      |
| no_gene  | no_gene      |
| no_gene  | AGL          |
| no_gene  | no_gene      |
| DDX10    | DDX10        |
| no_gene  | no_gene      |
| no_gene  | no_gene      |
| no_gene  | no_gene      |
| SLC25A24 | ODF2L        |
| no_gene  | no_gene      |
| NBPF4    | no_gene      |
| no_gene  | no_gene      |
| no_gene  | no_gene      |
| SULT1C2  | SULT1C2P1    |
| no_gene  | no_gene      |
| no_gene  | NBPF11       |

|           |              |
|-----------|--------------|
| no_gene   | no_gene      |
| no_gene   | STXBP3       |
| no_gene   | no_gene      |
| SULT1C2P1 | SULT1C2      |
| no_gene   | no_gene      |
| no_gene   | STXBP3       |
| no_gene   | LRRC8B       |
| no_gene   | PSRC1        |
| no_gene   | no_gene      |
| MAN2A1    | MAN2A1       |
| MAN2A1    | MAN2A1       |
| no_gene   | no_gene      |
| FAM102B   | no_gene      |
| no_gene   | no_gene      |
| FAM102B   | FPGT-TNNI3K  |
| HENMT1    | no_gene      |
| HENMT1    | CDC14A       |
| HENMT1    | ST6GALNAC3   |
| STXBP3    | no_gene      |
| no_gene   | no_gene      |
| no_gene   | no_gene      |
| STXBP3    | no_gene      |
| STXBP3    | no_gene      |
| no_gene   | no_gene      |
| AKNAD1    | BCAR3        |
| AKNAD1    | no_gene      |
| no_gene   | no_gene      |
| no_gene   | no_gene      |
| GPSM2     | no_gene      |
| GPSM2     | no_gene      |
| WDR47     | no_gene      |
| WDR47     | LOC100131564 |
| WDR47     | no_gene      |
| no_gene   | no_gene      |
| WDR47     | no_gene      |
| no_gene   | no_gene      |
| TAF13     | CCBL2        |
| KIAA1324  | RPAP2        |
| KIAA1324  | no_gene      |
| KIAA1324  | no_gene      |
| MYO16     | B3GALT1      |

|          |           |
|----------|-----------|
| CELSR2   | no_gene   |
| CELSR2   | ESPNP     |
| PSRC1    | no_gene   |
| PSRC1    | MTUS2     |
| PSRC1    | no_gene   |
| PSRC1    | MTUS2     |
| SORT1    | no_gene   |
| SORT1    | no_gene   |
| no_gene  | no_gene   |
| SORT1    | MIR548AA1 |
| no_gene  | no_gene   |
| SORT1    | no_gene   |
| SORT1    | no_gene   |
| SORT1    | no_gene   |
| no_gene  | no_gene   |
| no_gene  | no_gene   |
| PSMA5    | no_gene   |
| PSMA5    | DPYD      |
| PSMA5    | DPYD      |
| no_gene  | no_gene   |
| no_gene  | no_gene   |
| GNAI3    | FBXO42    |
| GNAI3    | FBXO42    |
| no_gene  | no_gene   |
| AMPD2    | RSG1      |
| AMPD2    | RSG1      |
| no_gene  | no_gene   |
| no_gene  | MROH9     |
| no_gene  | no_gene   |
| PAK3     | PAK3      |
| no_gene  | no_gene   |
| PAK3     | PAK3      |
| PAK3     | PAK3      |
| PAK3     | PAK3      |
| no_gene  | no_gene   |
| no_gene  | no_gene   |
| ARHGAP20 | ARHGAP20  |

|          |             |
|----------|-------------|
| no_gene  | CTNNBL1     |
| ARHGAP20 | ARHGAP20    |
| no_gene  | no_gene     |
| COL4A1   | CRADD       |
| no_gene  | PALM2-AKAP2 |
| MALL     | no_gene     |
| no_gene  | no_gene     |
| no_gene  | LOC727677   |
| no_gene  | no_gene     |
| no_gene  | no_gene     |
| TRPC5    | no_gene     |
| NREP     | NREP        |
| NREP     | NREP        |
| no_gene  | CD96        |
| CCDC63   | no_gene     |
| CD96     | no_gene     |
| CCDC63   | no_gene     |
| SLC16A10 | ATG5        |
| LRIF1    | no_gene     |
| no_gene  | LRIF1       |
| no_gene  | no_gene     |
| IKBKAP   | no_gene     |
| no_gene  | no_gene     |
| ARHGEF7  | no_gene     |
| ARHGEF7  | BTBD9       |
| ARHGEF7  | no_gene     |
| ARHGEF7  | no_gene     |
| ARHGEF7  | no_gene     |
| no_gene  | no_gene     |
| EPB41L4B | EPB41L4B    |
| no_gene  | NA          |
| EPB41L4B | EPB41L4B    |

|             |             |
|-------------|-------------|
| ATXN2       | SPATS2      |
| ATXN2       | SPATS2      |
| no_gene     | MCRS1       |
| no_gene     | MCRS1       |
| BCO2        | WDR70       |
| BCO2        | WDR70       |
| BRAP        | no_gene     |
| PTPN3       | PTPN3       |
| PTPN3       | PTPN3       |
| ALDH2       | no_gene     |
| ALDH2       | no_gene     |
| no_gene     | no_gene     |
| no_gene     | no_gene     |
| no_gene     | no_gene     |
| KCND3       | KCND3       |
| KCND3       | KCND3       |
| no_gene     | no_gene     |
| KCND3       | LOC643355   |
| PALM2       | PALM2-AKAP2 |
| LOC643355   | KCND3       |
| PALM2-AKAP2 | PALM2       |
| MERTK       | MERTK       |
| PALM2-AKAP2 | no_gene     |
| MCC         | MCC         |
| MERTK       | MERTK       |
| MCC         | MCC         |
| no_gene     | LOC255130   |
| no_gene     | no_gene     |
| NCAM1       | SAMD11      |
| NCAM1       | SAMD11      |
| RGPD5       | RGPD2       |
| no_gene     | SLC29A2     |
| no_gene     | SLC29A2     |
| ALPK1       | ALPK1       |
| ALPK1       | ALPK1       |
| no_gene     | no_gene     |
| no_gene     | ZNF678      |

|         |         |
|---------|---------|
| no_gene | no_gene |
| no_gene | no_gene |
| no_gene | FAM20B  |
| no_gene | SOCS5   |
| no_gene | SOCS5   |
| no_gene | no_gene |
| no_gene | no_gene |
| no_gene | KCNN2   |
| KCNN2   | no_gene |
| KCNN2   | PFDN1   |
| KCNN2   | PFDN1   |
| ANK2    | ANK2    |
| IL1RN   | INSIG2  |
| ANK2    | ANK2    |
| MAGI3   | SCN8A   |
| MAGI3   | no_gene |
| CSMD3   | no_gene |
| no_gene | GLDN    |
| no_gene | no_gene |
| LRCH2   | LRCH2   |
| RBM19   | RBM19   |
| LRCH2   | LRCH2   |
| no_gene | no_gene |
| RBM19   | RBM19   |
| no_gene | PTH2R   |
| no_gene | no_gene |
| RASA3   | no_gene |
| RASA3   | no_gene |
| no_gene | no_gene |
| TCF7L2  | no_gene |
| no_gene | no_gene |
| no_gene | no_gene |
| no_gene | TCF7L2  |
| no_gene | no_gene |

|         |         |
|---------|---------|
| no_gene | no_gene |
| no_gene | RASA3   |
| no_gene | RASA3   |
| no_gene | no_gene |
| no_gene | no_gene |
| no_gene | no_gene |
| no_gene | RBMS2   |
| no_gene | no_gene |
| TBX3    | no_gene |
| no_gene | RBMS2   |
| no_gene | no_gene |
| no_gene | TBX3    |
| no_gene | no_gene |
| AFAP1L2 | AFAP1L2 |
| AFAP1L2 | AFAP1L2 |
| DPP10   | DPP10   |
| DPP10   | DPP10   |
| no_gene | no_gene |
| no_gene | no_gene |
| FRK     | FRK     |
| no_gene | no_gene |
| no_gene | no_gene |
| no_gene | no_gene |
| FRK     | FRK     |
| DPP10   | DPP10   |
| DPP10   | DPP10   |
| no_gene | no_gene |
| no_gene | NT5DC1  |
| TRPS1   | FAM150A |
| NT5DC1  | no_gene |
| no_gene | RBM34   |
| no_gene | no_gene |



|             |              |
|-------------|--------------|
| no_gene     | no_gene      |
| no_gene     | PRRC2C       |
| no_gene     | IL17D        |
| no_gene     | IL17D        |
| no_gene     | no_gene      |
| LINC00536   | LINC00536    |
| MAP1LC3B2   | no_gene      |
| no_gene     | no_gene      |
| LINC00536   | LINC00536    |
| no_gene     | no_gene      |
| KLHL13      | KLHL13       |
| KLHL13      | KLHL13       |
| FBXW8       | PFKM         |
| no_gene     | no_gene      |
| no_gene     | RAP1B        |
| MAN1A2      | MAN1A2       |
| MAN1A2      | MAN1A2       |
| MAN1A2      | no_gene      |
| no_gene     | MAN1A2       |
| 1-Dec       | 1-Dec        |
| 1-Dec       | 1-Dec        |
| no_gene     | no_gene      |
| KSR2        | KSR2         |
| DTWD2       | no_gene      |
| KSR2        | KSR2         |
| UBE4A       | LOC100131626 |
| LOC10013162 | UBE4A        |
| no_gene     | no_gene      |
| no_gene     | no_gene      |
| no_gene     | no_gene      |
| no_gene     | ARHGEF7      |
| CEP85L      | CEP85L       |
| INSIG2      | IL1RN        |
| CEP85L      | CEP85L       |
| CEP85L      | no_gene      |
| no_gene     | BTBD11       |
| no_gene     | MCM9         |

|         |              |
|---------|--------------|
| MCM9    | no_gene      |
| no_gene | no_gene      |
| no_gene | no_gene      |
| no_gene | NA           |
| SAMD12  | PRIM2        |
| no_gene | ALDH2        |
| no_gene | ALDH2        |
| no_gene | no_gene      |
| no_gene | ZBPB         |
| EMX2OS  | no_gene      |
| no_gene | no_gene      |
| no_gene | EMX2OS       |
| no_gene | no_gene      |
| ASTN2   | ASTN2        |
| no_gene | no_gene      |
| no_gene | no_gene      |
| ASTN2   | ASTN2        |
| SAMD12  | no_gene      |
| MARCO   | RNGTT        |
| no_gene | AKR1C3       |
| no_gene | no_gene      |
| no_gene | no_gene      |
| no_gene | no_gene      |
| ASTN2   | no_gene      |
| ASTN2   | no_gene      |
| HSD3B2  | COL24A1      |
| HSD3B2  | COL24A1      |
| no_gene | CHD7         |
| no_gene | no_gene      |
| no_gene | no_gene      |
| FAM204A | no_gene      |
| no_gene | FAM204A      |
| DBI     | LOC100505989 |
| no_gene | ZNF697       |
| ZNF697  | no_gene      |
| no_gene | CYFIP1       |
| no_gene | CYFIP1       |
| no_gene | DBC1         |
| NOTCH2  | NBPF3        |
| NOTCH2  | NBPF3        |
| PTPN4   | PTPN4        |

|         |          |
|---------|----------|
| GRIK4   | GRIK4    |
| PTPN4   | PTPN4    |
| no_gene | no_gene  |
| GRIK4   | GRIK4    |
| STXBP5L | STXBP5L  |
| no_gene | ADAMTS16 |
| no_gene | ADAMTS16 |
| STXBP5L | STXBP5L  |
| no_gene | no_gene  |
| no_gene | no_gene  |
| no_gene | no_gene  |
| EPB41L5 | EPB41L5  |
| no_gene | no_gene  |
| EPB41L5 | EPB41L5  |
| no_gene | SEMA5A   |
| no_gene | SEMA5A   |
| no_gene | no_gene  |
| DEPTOR  | KCNQ3    |
| STXBP5L | no_gene  |
| no_gene | SAMD12   |
| STXBP5L | STXBP5L  |
| STXBP5L | RAPGEF1  |
| STXBP5L | STXBP5L  |
| no_gene | no_gene  |
| COL14A1 | COL14A1  |
| no_gene | no_gene  |
| FTMT    | CCDC41   |
| COL14A1 | COL14A1  |
| no_gene | SAR1A    |
| no_gene | C3orf70  |
| no_gene | C3orf70  |
| no_gene | CATSPER3 |
| no_gene | no_gene  |
| no_gene | no_gene  |
| PTPRZ1  | AASS     |
| AASS    | PTPRZ1   |
| DBC1    | DBC1     |
| no_gene | no_gene  |
| DBC1    | DBC1     |
| CASR    | no_gene  |
| no_gene | CASR     |
| DBC1    | no_gene  |
| no_gene | no_gene  |
| no_gene | no_gene  |

|             |                |
|-------------|----------------|
| no_gene     | no_gene        |
| no_gene     | STXBP1         |
| CADPS2      | CADPS2         |
| no_gene     | no_gene        |
| CADPS2      | CADPS2         |
| no_gene     | no_gene        |
| no_gene     | no_gene        |
| no_gene     | IKBKAP         |
| no_gene     | ASTN2          |
| no_gene     | ASTN2          |
| no_gene     | no_gene        |
| no_gene     | no_gene        |
| no_gene     | no_gene        |
| PRDM6       | PRDM6          |
| no_gene     | no_gene        |
| PRDM6       | PRDM6          |
| no_gene     | no_gene        |
| PKIB        | no_gene        |
| no_gene     | no_gene        |
| no_gene     | no_gene        |
| CLMP        | FEZ1           |
| no_gene     | LOC100507377   |
| no_gene     | no_gene        |
| no_gene     | LOC100507377   |
| no_gene     | no_gene        |
| SPATA5      | SPATA5         |
| SPATA5      | SPATA5         |
| ZHX2        | ZHX2           |
| ZHX2        | ZHX2           |
| no_gene     | no_gene        |
| ZNF664-FAM1 | ZNF664-FAM101A |
| FLJ46361    | no_gene        |
| no_gene     | FLJ46361       |
| no_gene     | SEL1L2         |
| ZNF664-FAM1 | ZNF664-FAM101A |

|         |          |
|---------|----------|
| TTLL11  | TTLL11   |
| no_gene | no_gene  |
| CNTNAP5 | no_gene  |
| CNTNAP5 | REL      |
| CNTNAP5 | PUS10    |
| no_gene | no_gene  |
| no_gene | no_gene  |
| no_gene | no_gene  |
| NKAIN2  | NKAIN2   |
| no_gene | no_gene  |
| NKAIN2  | NKAIN2   |
| no_gene | no_gene  |
| FEZ1    | CLMP     |
| no_gene | OR1B1    |
| OR1B1   | no_gene  |
| no_gene | no_gene  |
| OR1L1   | no_gene  |
| no_gene | no_gene  |
| no_gene | TLK1     |
| no_gene | no_gene  |
| no_gene | no_gene  |
| no_gene | SAMD4A   |
| no_gene | SAMD4A   |
| no_gene | no_gene  |
| CPXM2   | C1orf116 |
| no_gene | no_gene  |
| no_gene | no_gene  |
| RC3H2   | NRTN     |
| no_gene | RAPGEF6  |
| no_gene | RAPGEF6  |
| RABGAP1 | NFE2L1   |
| SLC41A3 | SLC41A3  |
| SLC41A3 | SLC41A3  |
| no_gene | CACNA2D1 |
| no_gene | CACNA2D1 |
| CDON    | no_gene  |
| no_gene | PPP6R3   |

|           |           |
|-----------|-----------|
| no_gene   | C10orf53  |
| C5orf63   | C5orf63   |
| C5orf63   | C5orf63   |
| no_gene   | TTC28     |
| no_gene   | TTC28     |
| CHCHD6    | CHCHD6    |
| KIRREL3   | KIRREL3   |
| CHCHD6    | CHCHD6    |
| KIRREL3   | KIRREL3   |
| no_gene   | no_gene   |
| no_gene   | ME1       |
| no_gene   | no_gene   |
| no_gene   | SDHAP3    |
| no_gene   | no_gene   |
| no_gene   | no_gene   |
| no_gene   | no_gene   |
| no_gene   | TMEM170A  |
| no_gene   | no_gene   |
| FBN2      | no_gene   |
| no_gene   | FBN2      |
| LEP       | no_gene   |
| no_gene   | THEMIS    |
| no_gene   | no_gene   |
| THEMIS    | no_gene   |
| no_gene   | no_gene   |
| POU5F1B   | ASH1L     |
| no_gene   | LOC727677 |
| no_gene   | no_gene   |
| LOC727677 | no_gene   |
| LOC727677 | no_gene   |

|             |         |
|-------------|---------|
| LOC727677   | no_gene |
| no_gene     | no_gene |
| AHCYL2      | no_gene |
| no_gene     | no_gene |
| no_gene     | no_gene |
| no_gene     | CDON    |
| no_gene     | no_gene |
| FAM86HP     | FAM66D  |
| no_gene     | no_gene |
| CPA4        | no_gene |
| no_gene     | no_gene |
| STXBP1      | no_gene |
| no_gene     | CERKL   |
| LOC10013132 | OR6C3   |
| no_gene     | no_gene |
| no_gene     | HDGF    |
| no_gene     | no_gene |
| RAPGEF6     | no_gene |
| RAPGEF6     | no_gene |
| DNM1        | DNM1P35 |
| GOLGA2      | DNM1P35 |
| no_gene     | no_gene |
| no_gene     | no_gene |
| ASAP1       | ASAP1   |
| ASAP1       | ASAP1   |
| POTEJ       | no_gene |

|           |           |
|-----------|-----------|
| no_gene   | OR1L1     |
| MGMT      | MGMT      |
| MGMT      | MGMT      |
| CPNE4     | CPNE4     |
| no_gene   | no_gene   |
| CPNE4     | CPNE4     |
| CCBL1     | DHRS4L2   |
| no_gene   | HTR7      |
| no_gene   | no_gene   |
| NTM       | NTM       |
| NTM       | NTM       |
| ADCY8     | ADCY8     |
| ADCY8     | ADCY8     |
| NTM       | NTM       |
| no_gene   | no_gene   |
| no_gene   | ZNF678    |
| ENPP3     | no_gene   |
| NTM       | NTM       |
| PLXNA4    | PLXNA4    |
| no_gene   | SDHAP3    |
| no_gene   | no_gene   |
| no_gene   | no_gene   |
| PLXNA4    | PLXNA4    |
| PLXNA4    | PLXNA4    |
| PLXNA4    | PLXNA4    |
| no_gene   | no_gene   |
| no_gene   | no_gene   |
| OPCML     | EYS       |
| NPHP3-AS1 | no_gene   |
| C2orf27B  | no_gene   |
| no_gene   | no_gene   |
| no_gene   | no_gene   |
| no_gene   | MGC21881  |
| no_gene   | NUP210L   |
| STX7      | no_gene   |
| no_gene   | no_gene   |
| no_gene   | STX7      |
| no_gene   | no_gene   |
| TCERG1L   | no_gene   |
| no_gene   | LOC654342 |



|          |              |
|----------|--------------|
| no_gene  | TCERG1L      |
| GPR39    | GPR39        |
| KCNQ3    | LOC100616530 |
| KCNQ3    | DEPTOR       |
| no_gene  | no_gene      |
| no_gene  | no_gene      |
| no_gene  | TG           |
| TG       | no_gene      |
| no_gene  | no_gene      |
| no_gene  | no_gene      |
| GLB1L3   | no_gene      |
| GLB1L3   | no_gene      |
| CATSPER3 | no_gene      |
| no_gene  | no_gene      |
| no_gene  | no_gene      |
| no_gene  | no_gene      |
| RAPGEF1  | STXBP5L      |
| no_gene  | no_gene      |
| no_gene  | no_gene      |
| no_gene  | no_gene      |
| MED27    | MED27        |
| MED27    | MED27        |
| no_gene  | CSMD1        |
| no_gene  | LOC100616530 |
| no_gene  | no_gene      |
| no_gene  | no_gene      |
| no_gene  | no_gene      |
| no_gene  | LOC100505495 |
| no_gene  | NOMO2        |
| no_gene  | no_gene      |
| no_gene  | FAM41C       |
| no_gene  | no_gene      |
| no_gene  | no_gene      |
| no_gene  | PPP2R3A      |
| PPP2R3A  | no_gene      |
| MAP3K19  | no_gene      |
| no_gene  | no_gene      |

|           |           |
|-----------|-----------|
| no_gene   | no_gene   |
| ADAMTSL2  | no_gene   |
| no_gene   | ADAMTSL2  |
| SPOCK1    | SPOCK1    |
| SPOCK1    | SPOCK1    |
| CHRM2     | CHRM2     |
| CHRM2     | CHRM2     |
| LOC349160 | LOC349160 |
| LOC349160 | LOC349160 |
| PTN       | ZNF678    |
| no_gene   | no_gene   |
| no_gene   | no_gene   |
| no_gene   | no_gene   |
| no_gene   | NCOA2     |
| no_gene   | LAMP5     |
| no_gene   | PAK7      |
| no_gene   | LOC284385 |
| CLDN18    | DZIP1L    |
| no_gene   | no_gene   |
| DZIP1L    | CLDN18    |
| ETF1      | no_gene   |
| THSD7B    | THSD7B    |
| no_gene   | no_gene   |
| THSD7B    | THSD7B    |
| no_gene   | no_gene   |
| no_gene   | no_gene   |
| MCF2      | MCF2      |
| MCF2      | MCF2      |
| no_gene   | no_gene   |
| no_gene   | ATG5      |
| no_gene   | KCNB2     |
| PFDN1     | KCNN2     |
| PFDN1     | KCNN2     |
| no_gene   | no_gene   |
| no_gene   | no_gene   |
| COL22A1   | no_gene   |
| ELF2      | no_gene   |

|             |              |
|-------------|--------------|
| no_gene     | no_gene      |
| CLSTN2      | CLSTN2       |
| CLSTN2      | CLSTN2       |
| no_gene     | FAM110B      |
| LOC10013273 | LOC100132735 |
| LOC10013273 | LOC100132735 |
| no_gene     | no_gene      |
| PNPLA7      | no_gene      |
| no_gene     | no_gene      |
| no_gene     | no_gene      |
| no_gene     | CACNA1B      |
| CACNA1B     | no_gene      |
| no_gene     | no_gene      |
| no_gene     | no_gene      |
| CACNA1B     | CACNA1B      |
| CACNA1B     | CACNA1B      |
| no_gene     | no_gene      |
| TRAPPC9     | TRAPPC9      |
| no_gene     | FAM41AY2     |
| TRAPPC9     | TRAPPC9      |
| LRP1B       | no_gene      |
| SSBP1       | no_gene      |
| TAS2R38     | MGAM         |
| MGAM        | TAS2R38      |
| PTK2        | PTK2         |
| no_gene     | RNF150       |
| PTK2        | PTK2         |
| RNF150      | no_gene      |
| PTK2        | PTK2         |
| LRP1B       | LRP1B        |
| PTK2        | PTK2         |
| PTK2        | no_gene      |
| no_gene     | PTK2         |
| XRN1        | XRN1         |
| XRN1        | XRN1         |
| SPANXN4     | SPANXN2      |
| no_gene     | no_gene      |
| ARHGAP26    | ARHGAP26     |
| ARHGAP26    | ARHGAP26     |
| no_gene     | no_gene      |
| no_gene     | no_gene      |

|             |             |
|-------------|-------------|
| no_gene     | no_gene     |
| no_gene     | VTA1        |
| no_gene     | no_gene     |
| VTA1        | no_gene     |
| no_gene     | no_gene     |
| ANKRD20A12P | no_gene     |
| ANKRD20A12P | SLC6A19     |
| SPANXN2     | SPANXN4     |
| no_gene     | no_gene     |
| no_gene     | no_gene     |
| no_gene     | SLC6A19     |
| no_gene     | SLC6A19     |
| no_gene     | no_gene     |
| no_gene     | OXR1        |
| no_gene     | no_gene     |
| no_gene     | no_gene     |
| no_gene     | AQP7P1      |
| no_gene     | ANKRD20A12P |
| no_gene     | no_gene     |
| no_gene     | no_gene     |
| no_gene     | no_gene     |
| no_gene     | SLC6A19     |
| no_gene     | SLC6A19     |
| no_gene     | no_gene     |
| no_gene     | no_gene     |
| no_gene     | FAM115A     |
| no_gene     | no_gene     |
| no_gene     | ENPP3       |
| no_gene     | no_gene     |
| no_gene     | no_gene     |
| FAM115A     | no_gene     |
| FLJ39739    | no_gene     |
| FLJ39739    | no_gene     |
| no_gene     | no_gene     |
| no_gene     | no_gene     |
| PPIAL4G     | no_gene     |

|           |           |
|-----------|-----------|
| no_gene   | no_gene   |
| no_gene   | DOC2GP    |
| no_gene   | no_gene   |
| no_gene   | NBPF11    |
| no_gene   | no_gene   |
| TPK1      | no_gene   |
| no_gene   | no_gene   |
| no_gene   | no_gene   |
| LINC00623 | FLJ39739  |
| no_gene   | no_gene   |
| ZFP41     | LINC00639 |
| no_gene   | ZMYM2     |
| TOP1MT    | no_gene   |
| no_gene   | no_gene   |
| no_gene   | LOR       |
| no_gene   | LOR       |
| no_gene   | no_gene   |
| NBPF9     | NBPF14    |
| NBPF9     | no_gene   |
| NBPF9     | no_gene   |
| NBPF9     | NOTCH2NL  |
| NBPF9     | NOTCH2NL  |
| NBPF9     | NA        |
| GYPE      | no_gene   |
| GYPE      | no_gene   |
| GYPE      | no_gene   |
| NBPF9     | no_gene   |
| no_gene   | no_gene   |
| PDE4DIP   | NA        |
| PDE4DIP   | EFNA3     |
| no_gene   | no_gene   |
| PDE4DIP   | EFNA3     |
| GYPB      | no_gene   |
| PDE4DIP   | NOTCH2NL  |
| PDE4DIP   | no_gene   |
| PDE4DIP   | no_gene   |
| PDE4DIP   | ROCK1P1   |
| PDE4DIP   | NOTCH2NL  |
| PDE4DIP   | PDE4DIP   |
| UTRN      | no_gene   |
| no_gene   | no_gene   |
| PDE4DIP   | PDE4DIP   |
| PDE4DIP   | no_gene   |
| PDE4DIP   | no_gene   |

|          |              |
|----------|--------------|
| no_gene  | no_gene      |
| PDE4DIP  | no_gene      |
| no_gene  | GYPE         |
| no_gene  | ADAMTS16     |
| no_gene  | ADAMTS16     |
| no_gene  | GYPE         |
| no_gene  | GYPB         |
| no_gene  | GYPE         |
| no_gene  | AMZ1         |
| no_gene  | ADAMTS16     |
| no_gene  | no_gene      |
| NOTCH2NL | NOTCH2NL     |
| NOTCH2NL | NOTCH2NL     |
| NOTCH2NL | PDE4DIP      |
| NOTCH2NL | PDE4DIP      |
| NOTCH2NL | NBPF9        |
| NOTCH2NL | NBPF9        |
| no_gene  | no_gene      |
| no_gene  | no_gene      |
| no_gene  | PKIB         |
| no_gene  | no_gene      |
| NBPF11   | no_gene      |
| NBPF11   | no_gene      |
| NBPF11   | no_gene      |
| no_gene  | no_gene      |
| PPP2R2B  | PPP2R2B      |
| no_gene  | no_gene      |
| PPP2R2B  | PPP2R2B      |
| no_gene  | no_gene      |
| STK32A   | LOC100505495 |
| STK32A   | LOC100505495 |
| STK32A   | no_gene      |
| no_gene  | no_gene      |
| CNTNAP2  | NUP107       |
| CNTNAP2  | NUP107       |
| CNTNAP2  | SLC6A3       |
| no_gene  | no_gene      |
| no_gene  | no_gene      |
| no_gene  | HAX1         |
| no_gene  | PLEKHA6      |

|            |            |
|------------|------------|
| STXBP5-AS1 | STXBP5-AS1 |
| STXBP5-AS1 | STXBP5-AS1 |
| CNTNAP2    | no_gene    |
| no_gene    | no_gene    |
| no_gene    | no_gene    |
| SPINK6     | no_gene    |
| no_gene    | SPINK6     |
| SPINK13    | SPINK7     |
| SPINK7     | SPINK13    |
| no_gene    | NBPF4      |
| no_gene    | NBPF11     |
| no_gene    | no_gene    |
| no_gene    | no_gene    |
| FLJ39739   | LINC00623  |
| CNTNAP2    | no_gene    |
| NBPF14     | NBPF9      |
| HTR4       | no_gene    |
| no_gene    | no_gene    |
| no_gene    | HTR4       |
| no_gene    | no_gene    |
| SH3TC2     | no_gene    |
| no_gene    | SH3TC2     |
| no_gene    | no_gene    |
| MAGEA9B    | MAGEA8     |
| no_gene    | no_gene    |
| no_gene    | no_gene    |
| MBD5       | MBD5       |
| MBD5       | MBD5       |
| no_gene    | HPS3       |
| no_gene    | no_gene    |
| MBD5       | MBD5       |
| MBD5       | MBD5       |
| HPS3       | no_gene    |
| no_gene    | no_gene    |
| ARHGAP10   | ARHGAP10   |

|           |           |
|-----------|-----------|
| no_gene   | no_gene   |
| no_gene   | no_gene   |
| no_gene   | KDM6A     |
| ARHGAP10  | ARHGAP10  |
| no_gene   | no_gene   |
| no_gene   | PPIAL4G   |
| MAGEA8    | MAGEA9B   |
| MBD5      | no_gene   |
| no_gene   | STARD8    |
| no_gene   | no_gene   |
| NR3C2     | no_gene   |
| LOC388692 | no_gene   |
| no_gene   | LOC388692 |
| no_gene   | no_gene   |
| no_gene   | no_gene   |
| no_gene   | no_gene   |
| no_gene   | KIF5C     |
| KIF5C     | no_gene   |
| no_gene   | no_gene   |
| KIF5C     | KIF5C     |
| KIF5C     | KIF5C     |
| no_gene   | no_gene   |
| LYPD6     | LYPD6     |
| LYPD6     | LYPD6     |
| no_gene   | no_gene   |
| no_gene   | no_gene   |
| no_gene   | RIMKLB    |
| ENSA      | no_gene   |
| no_gene   | no_gene   |
| no_gene   | no_gene   |
| no_gene   | C8B       |
| ARNT      | CDH5      |
| no_gene   | no_gene   |
| LRBA      | no_gene   |
| no_gene   | CR1       |
| GALNT11   | no_gene   |
| GALNT11   | no_gene   |





|         |          |
|---------|----------|
| TPM3    | no_gene  |
| HAX1    | no_gene  |
| DPP6    | DPP6     |
| DPP6    | DPP6     |
| no_gene | F8       |
| no_gene | no_gene  |
| no_gene | LPPR1    |
| no_gene | no_gene  |
| no_gene | no_gene  |
| EFNA3   | PDE4DIP  |
| EFNA3   | PDE4DIP  |
| SLC50A1 | RABGAP1L |
| SLC50A1 | RABGAP1L |
| no_gene | no_gene  |
| no_gene | no_gene  |
| ASH1L   | POU5F1B  |
| ASH1L   | no_gene  |
| ASH1L   | no_gene  |
| no_gene | HPN      |
| no_gene | SGCD     |
| no_gene | DEFB107B |
| KCNJ3   | no_gene  |
| no_gene | KCNJ3    |
| SGCD    | no_gene  |
| SGCD    | PRODH    |
| no_gene | no_gene  |
| no_gene | no_gene  |
| no_gene | DYNC2H1  |
| no_gene | no_gene  |
| no_gene | MYRIP    |
| CYFIP2  | CYFIP2   |
| HDGF    | no_gene  |
| CYFIP2  | CYFIP2   |
| no_gene | GABRA2   |
| no_gene | no_gene  |
| no_gene | no_gene  |
| ADAM19  | ADAM19   |
| ADAM19  | ADAM19   |
| no_gene | no_gene  |
| VEPH1   | VEPH1    |
| no_gene | no_gene  |
| VEPH1   | VEPH1    |
| no_gene | GALNT11  |
| no_gene | no_gene  |

|            |                |
|------------|----------------|
| TMEM242    | no_gene        |
| no_gene    | KIRREL         |
| no_gene    | no_gene        |
| no_gene    | no_gene        |
| KIRREL     | no_gene        |
| no_gene    | no_gene        |
| no_gene    | no_gene        |
| EBF1       | no_gene        |
| no_gene    | HSP90AA1       |
| no_gene    | SPTA1          |
| SPTA1      | no_gene        |
| no_gene    | COL22A1        |
| LOC285626  | HEPH           |
| no_gene    | BLOC1S5-TXNDC5 |
| no_gene    | no_gene        |
| no_gene    | no_gene        |
| no_gene    | FCER1G         |
| FNDC1      | no_gene        |
| no_gene    | NA             |
| no_gene    | no_gene        |
| SLU7       | no_gene        |
| no_gene    | PDE4D          |
| no_gene    | PDE4D          |
| no_gene    | ADAMTS6        |
| MIR3142    | no_gene        |
| COPA       | no_gene        |
| COPA       | SUMO1P1        |
| COPA       | no_gene        |
| IGF2R      | FCHO2          |
| CD48       | PRAMEF12       |
| no_gene    | LRP1B          |
| CD48       | no_gene        |
| no_gene    | no_gene        |
| no_gene    | no_gene        |
| LY75-CD302 | PLA2R1         |
| LY75-CD302 | PLA2R1         |
| PLA2R1     | LY75-CD302     |
| PLA2R1     | LY75-CD302     |
| no_gene    | no_gene        |
| PLG        | no_gene        |
| no_gene    | no_gene        |

|         |              |
|---------|--------------|
| no_gene | no_gene      |
| FCER1G  | no_gene      |
| no_gene | PLG          |
| no_gene | no_gene      |
| no_gene | no_gene      |
| PCP4L1  | no_gene      |
| no_gene | no_gene      |
| no_gene | no_gene      |
| no_gene | CYP4V2       |
| no_gene | LRBA         |
| no_gene | no_gene      |
| no_gene | no_gene      |
| no_gene | GPR149       |
| no_gene | no_gene      |
| no_gene | OSBPL3       |
| no_gene | no_gene      |
| NOS1AP  | NOS1AP       |
| NOS1AP  | NOS1AP       |
| no_gene | no_gene      |
| no_gene | no_gene      |
| NOS1AP  | NOS1AP       |
| NOS1AP  | NOS1AP       |
| NOS1AP  | no_gene      |
| no_gene | no_gene      |
| PARK2   | SCUBE3       |
| RGS5    | NUF2         |
| NUF2    | RGS5         |
| no_gene | no_gene      |
| no_gene | no_gene      |
| no_gene | LOC100506023 |
| no_gene | no_gene      |
| no_gene | no_gene      |
| no_gene | SLU7         |
| no_gene | no_gene      |
| no_gene | CHM          |
| no_gene | METTL9       |

|             |          |
|-------------|----------|
| no_gene     | no_gene  |
| no_gene     | no_gene  |
| no_gene     | no_gene  |
| no_gene     | ZNF587   |
| no_gene     | no_gene  |
| 1-Mar       | 1-Mar    |
| 1-Mar       | no_gene  |
| 1-Mar       | 1-Mar    |
| 1-Mar       | no_gene  |
| MIR5684     | MAP2K6   |
| LOC10050598 | DBI      |
| no_gene     | no_gene  |
| no_gene     | no_gene  |
| PDE10A      | no_gene  |
| PDE10A      | PROKR2   |
| PDE10A      | CCSER1   |
| SCN3A       | no_gene  |
| no_gene     | no_gene  |
| no_gene     | no_gene  |
| no_gene     | no_gene  |
| SCN2A       | SCN9A    |
| FMO9P       | no_gene  |
| FMO9P       | no_gene  |
| no_gene     | DOCK2    |
| TENM2       | ATP6V0E1 |
| SFT2D1      | no_gene  |
| TTC21B      | no_gene  |
| TENM2       | TENM2    |
| no_gene     | TTC21B   |
| TENM2       | RNF145   |
| TENM2       | RARS     |
| TENM2       | RPL26L1  |
| TENM2       | no_gene  |
| SCN9A       | SCN2A    |
| TENM2       | TENM2    |
| no_gene     | no_gene  |
| WDR49       | CAMKMT   |
| no_gene     | no_gene  |
| no_gene     | LAPTM4B  |
| no_gene     | LAPTM4B  |

|         |         |
|---------|---------|
| no_gene | no_gene |
| no_gene | no_gene |
| WWC1    | no_gene |
| no_gene | no_gene |
| RARS    | TENM2   |
| RARS    | no_gene |
| no_gene | no_gene |
| DOCK2   | no_gene |
| no_gene | no_gene |
| MECOM   | MECOM   |
| MECOM   | MECOM   |
| DOCK2   | no_gene |
| DOCK2   | DOCK2   |
| DOCK2   | DOCK2   |
| no_gene | no_gene |
| NOSTRIN | NOSTRIN |
| NOSTRIN | NOSTRIN |
| KCNIP1  | HBZ     |
| PHF10   | LRP5L   |
| no_gene | no_gene |
| no_gene | no_gene |
| RANBP17 | RANBP17 |
| RANBP17 | RANBP17 |
| MROH9   | no_gene |
| no_gene | no_gene |
| no_gene | no_gene |
| FMO1    | THSD4   |
| MYO3B   | no_gene |
| PRRC2C  | no_gene |
| no_gene | MACROD2 |
| STK10   | SFXN1   |
| TLK1    | no_gene |
| no_gene | no_gene |
| no_gene | no_gene |

|             |              |
|-------------|--------------|
| no_gene     | PDE4D        |
| no_gene     | no_gene      |
| no_gene     | no_gene      |
| no_gene     | TENM2        |
| RPL26L1     | TENM2        |
| ATP6V0E1    | no_gene      |
| ATP6V0E1    | TENM2        |
| no_gene     | no_gene      |
| STC2        | no_gene      |
| no_gene     | STC2         |
| no_gene     | no_gene      |
| no_gene     | no_gene      |
| LOC10050602 | no_gene      |
| LOC10050602 | no_gene      |
| LOC10050602 | LOC100506023 |
| no_gene     | no_gene      |
| LOC10050602 | LOC100506023 |
| GALNTL6     | GALNTL6      |
| GALNTL6     | GALNTL6      |
| no_gene     | no_gene      |
| no_gene     | no_gene      |
| NLGN1       | NLGN1        |
| NLGN1       | NLGN1        |
| no_gene     | no_gene      |
| no_gene     | CPLX2        |
| FLJ16171    | no_gene      |
| no_gene     | FLJ16171     |
| no_gene     | no_gene      |
| DRD1        | no_gene      |
| no_gene     | DRD1         |
| SFXN1       | STK10        |
| RABGAP1L    | SLC50A1      |
| RABGAP1L    | SLC50A1      |
| TNN         | no_gene      |
| no_gene     | no_gene      |
| no_gene     | no_gene      |
| CPLX2       | no_gene      |
| no_gene     | no_gene      |
| ADAM29      | no_gene      |
| GPRIN1      | no_gene      |
| no_gene     | GPRIN1       |

|           |            |
|-----------|------------|
| no_gene   | no_gene    |
| no_gene   | no_gene    |
| PAPPA2    | DPYD       |
| PAPPA2    | DPYD       |
| NSD1      | no_gene    |
| TBL1XR1   | OPA1       |
| FAM153A   | CDKN2B-AS1 |
| FAM153A   | CDKN2B-AS1 |
| no_gene   | CDH18      |
| no_gene   | PDE10A     |
| no_gene   | no_gene    |
| no_gene   | RAB3C      |
| HNRNPA3   | SCN8A      |
| KCNMB2    | KCNMB2     |
| KCNMB2    | KCNMB2     |
| no_gene   | no_gene    |
| ADAMTS2   | NCOA2      |
| ADAMTS2   | NCOA2      |
| ADAMTS2   | NCOA2      |
| no_gene   | no_gene    |
| FAM20B    | no_gene    |
| ABL2      | no_gene    |
| ABL2      | no_gene    |
| no_gene   | no_gene    |
| CANX      | no_gene    |
| CANX      | no_gene    |
| no_gene   | MGAT1      |
| FLJ23867  | LHX4       |
| LHX4      | FLJ23867   |
| MGAT1     | no_gene    |
| no_gene   | PTPRB      |
| no_gene   | no_gene    |
| no_gene   | no_gene    |
| no_gene   | FBN1       |
| no_gene   | no_gene    |
| no_gene   | no_gene    |
| LINC00290 | LINC00290  |
| LINC00290 | LINC00290  |
| CERKL     | no_gene    |
| ALG3      | no_gene    |



|         |         |
|---------|---------|
| no_gene | no_gene |
| no_gene | no_gene |
| no_gene | no_gene |
| no_gene | GALNT11 |
| VPS8    | SDHAP3  |
| VPS8    | ACOT11  |
| VPS8    | ABCD3   |
| C3orf70 | no_gene |
| C3orf70 | no_gene |
| no_gene | no_gene |
| no_gene | no_gene |
| ZNF804A | ZNF804A |
| ZNF804A | ZNF804A |
| no_gene | CCDC41  |
| no_gene | no_gene |
| RFC4    | no_gene |
| no_gene | no_gene |
| no_gene | no_gene |
| no_gene | no_gene |
| PLA2G4A | DYX1C1  |
| PLA2G4A | TTY11   |
| CYP4V2  | no_gene |
| no_gene | no_gene |
| SNAR-I  | SNAR-F  |
| SNAR-I  | SNAR-F  |
| no_gene | FAM182B |
| no_gene | FAM182B |
| no_gene | FAM27B  |
| no_gene | no_gene |
| no_gene | no_gene |

|          |              |
|----------|--------------|
| no_gene  | FMO9P        |
| HIBCH    | HIBCH        |
| no_gene  | no_gene      |
| MFSD6    | TMEM194B     |
| no_gene  | no_gene      |
| no_gene  | no_gene      |
| no_gene  | no_gene      |
| TMEM194B | MFSD6        |
| no_gene  | no_gene      |
| no_gene  | no_gene      |
| no_gene  | D2HGDH       |
| no_gene  | no_gene      |
| no_gene  | no_gene      |
| CDC73    | no_gene      |
| no_gene  | CDC73        |
| OPA1     | TBL1XR1      |
| no_gene  | DMGDH        |
| no_gene  | no_gene      |
| CRB1     | NME7         |
| CRB1     | NME7         |
| HECW2    | HECW2        |
| HECW2    | HECW2        |
| no_gene  | no_gene      |
| DENND1B  | no_gene      |
| no_gene  | no_gene      |
| no_gene  | CAPN8        |
| LHX9     | no_gene      |
| LHX9     | LPGAT1       |
| no_gene  | no_gene      |
| no_gene  | LOC100133331 |
| no_gene  | no_gene      |
| PLCL1    | PLCL1        |
| PLCL1    | PLCL1        |
| no_gene  | no_gene      |
| no_gene  | no_gene      |
| no_gene  | no_gene      |

|           |          |
|-----------|----------|
| no_gene   | no_gene  |
| no_gene   | ENSA     |
| FAM126B   | no_gene  |
| ALS2CR12  | ALS2CR12 |
| ALS2CR12  | ALS2CR12 |
| PPP1R12B  | PPP1R12B |
| PPP1R12B  | PPP1R12B |
| LOC148709 | no_gene  |
| LOC730227 | no_gene  |
| no_gene   | PLEKHA6  |
| PLEKHA6   | no_gene  |
| PLEKHA6   | no_gene  |
| PLEKHA6   | no_gene  |
| LRRN2     | no_gene  |
| ICOS      | no_gene  |
| ICOS      | no_gene  |
| LOC284581 | no_gene  |
| no_gene   | no_gene  |
| no_gene   | no_gene  |
| C1orf186  | CCSER1   |
| C1orf186  | no_gene  |
| IL20      | no_gene  |
| IL20      | no_gene  |
| C1orf116  | CPXM2    |
| DYTN      | no_gene  |
| DYTN      | no_gene  |
| CR2       | SHANK3   |
| no_gene   | no_gene  |
| no_gene   | ICOS     |
| CR1       | CR1      |
| CR1       | no_gene  |
| CR1       | CR1      |
| no_gene   | no_gene  |
| no_gene   | no_gene  |
| no_gene   | no_gene  |
| no_gene   | NOS1AP   |
| METTL21A  | BHMT     |
| no_gene   | no_gene  |
| no_gene   | no_gene  |

|           |           |
|-----------|-----------|
| PTH2R     | no_gene   |
| no_gene   | GPATCH2   |
| no_gene   | GPATCH2   |
| HSD11B1   | ZNF25     |
| HSD11B1   | no_gene   |
| HSD11B1   | TRAF3IP3  |
| TRAF3IP3  | HSD11B1   |
| TRAF3IP3  | DUSP10    |
| no_gene   | no_gene   |
| no_gene   | no_gene   |
| SYT14     | SYT14     |
| SYT14     | SYT14     |
| no_gene   | no_gene   |
| HHAT      | no_gene   |
| KCNH1     | KCNH1     |
| KCNH1     | KCNH1     |
| TRAF5     | DROSHA    |
| no_gene   | no_gene   |
| LPGAT1    | LHX9      |
| ERBB4     | ERBB4     |
| no_gene   | no_gene   |
| ERBB4     | no_gene   |
| no_gene   | ERBB4     |
| no_gene   | LINC00538 |
| LINC00538 | no_gene   |
| no_gene   | TESPA1    |
| GPATCH2   | no_gene   |



|           |           |
|-----------|-----------|
| no_gene   | no_gene   |
| no_gene   | no_gene   |
| no_gene   | RHOU      |
| no_gene   | no_gene   |
| no_gene   | no_gene   |
| no_gene   | no_gene   |
| no_gene   | PRKCB     |
| no_gene   | TMEM101   |
| no_gene   | no_gene   |
| no_gene   | no_gene   |
| ITPKB     | no_gene   |
| no_gene   | no_gene   |
| no_gene   | STXBP5L   |
| no_gene   | no_gene   |
| CDC42BPA  | C10orf99  |
| CDC42BPA  | C10orf99  |
| no_gene   | no_gene   |
| ZNF678    | CCNB3     |
| ZNF678    | no_gene   |
| ZNF678    | PTN       |
| ZNF678    | no_gene   |
| ZNF678    | no_gene   |
| no_gene   | no_gene   |
| RHOU      | no_gene   |
| no_gene   | GALNT2    |
| GALNT2    | no_gene   |
| no_gene   | no_gene   |
| no_gene   | no_gene   |
| LOC151484 | no_gene   |
| no_gene   | LOC151484 |
| no_gene   | no_gene   |

|              |              |
|--------------|--------------|
| no_gene      | no_gene      |
| no_gene      | no_gene      |
| no_gene      | no_gene      |
| no_gene      | FAM150B      |
| no_gene      | COA6         |
| COA6         | no_gene      |
| TARBP1       | no_gene      |
| no_gene      | TARBP1       |
| RBM34        | no_gene      |
| no_gene      | no_gene      |
| ASB18        | no_gene      |
| RYR2         | RYR2         |
| no_gene      | JAK2         |
| no_gene      | no_gene      |
| no_gene      | no_gene      |
| no_gene      | no_gene      |
| HDAC4        | HDAC4        |
| HDAC4        | HDAC4        |
| no_gene      | no_gene      |
| no_gene      | no_gene      |
| RGS7         | RGS7         |
| RGS7         | RGS7         |
| no_gene      | no_gene      |
| no_gene      | no_gene      |
| CAPN10       | GPR35        |
| GPR35        | CAPN10       |
| PLD5         | no_gene      |
| PLD5         | no_gene      |
| PLD5         | GLYATL3      |
| D2HGDH       | no_gene      |
| no_gene      | no_gene      |
| no_gene      | no_gene      |
| no_gene      | ZNF580       |
| no_gene      | no_gene      |
| ZNF670-ZNF69 | NA           |
| ZNF124       | no_gene      |
| ZNF124       | LONRF1       |
| OR6F1        | LOC100508120 |
| OR2W3        | no_gene      |
| no_gene      | no_gene      |
| OR2T29       | OR2T10       |

|         |        |
|---------|--------|
| OR2T10  | OR2T29 |
| no_gene | ITPKB  |
