# Supplementary material
Source: PubMed Central journal article supplement (PMC4399556)

Supplementary Figure 1. WGA DNA Quality

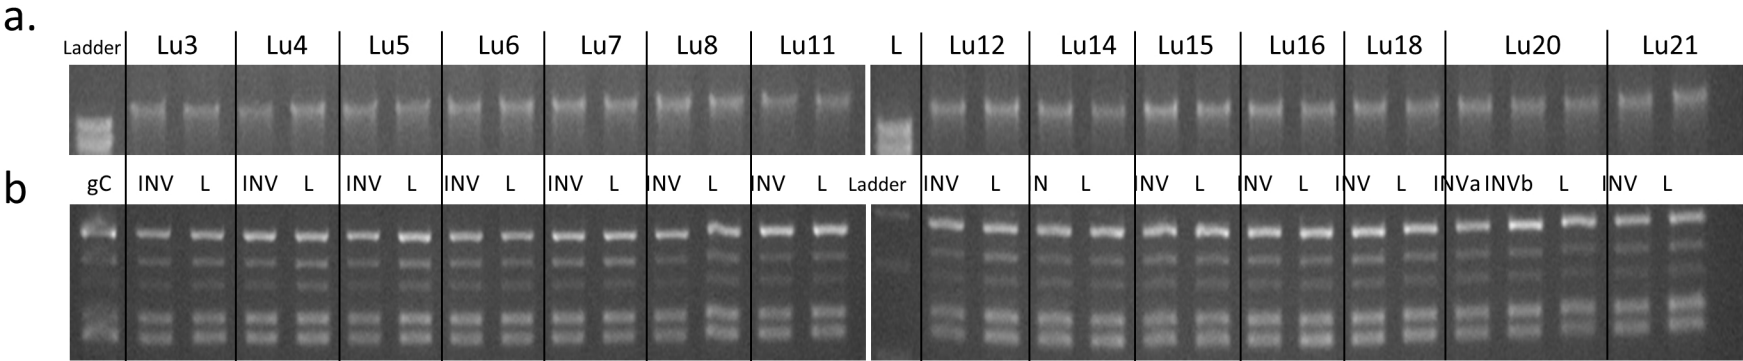

Supplement: NIHMS660173-supplement-s1.pdf [file NIHMS660173-supplement-s1.pdf]

Supplementary Figure 2.

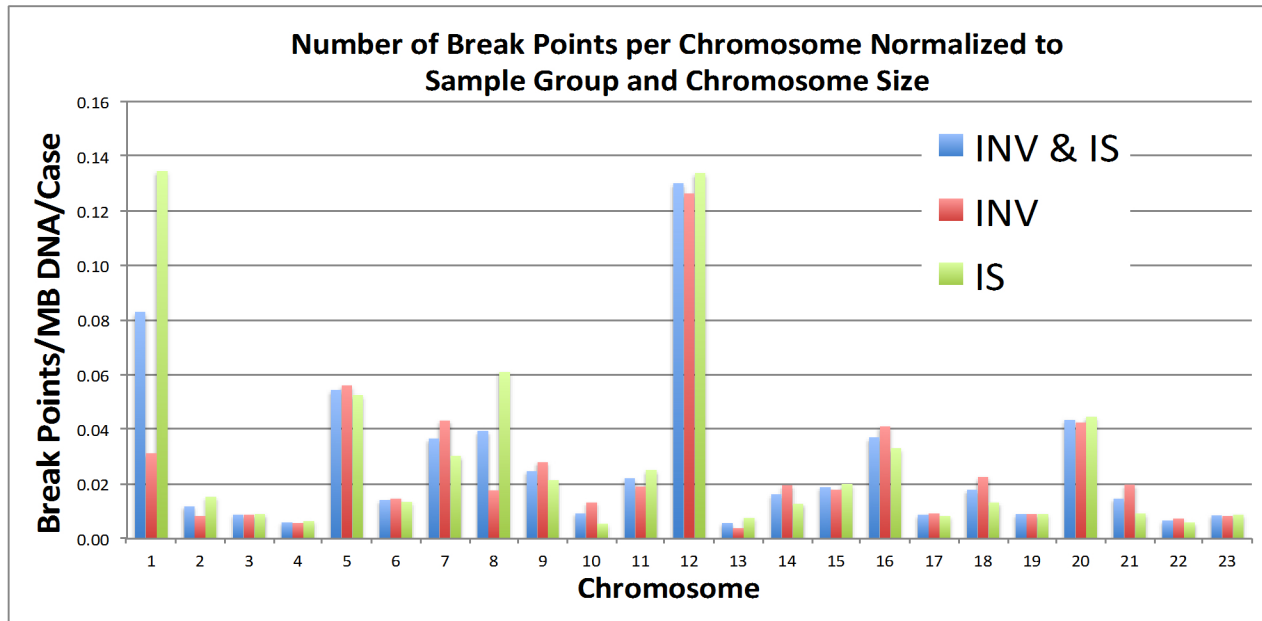

Supplement: NIHMS660173-supplement-s2.pdf [file NIHMS660173-supplement-s2.pdf]

Supplementary Figure 5. Dendrogram

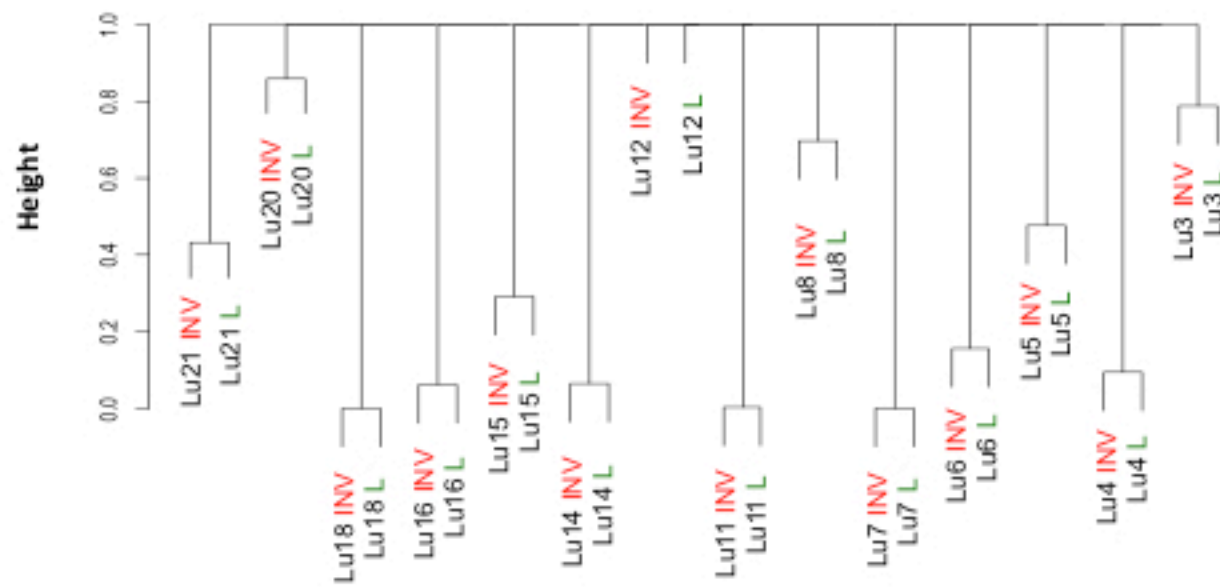

Supplement: NIHMS660173-supplement-s5.pdf [file NIHMS660173-supplement-s5.pdf]
